# Supplementary material
Source: PubMed Central journal article supplement (PMC6954708)
Supplement: PRO-29-509-s002.pdf [file PRO-29-509-s002.pdf]

#ID DESC POS SEQ FND

sp:F181A\_HUMAN [Q8N9Y4] RecName: Full=Protein **FAM181A**;>rs:NP\_612353  
[NP\_612353] protein **FAM181A** isoform 1 [Homo sapiens].191..205

MPLEERRSSGERNDAAPTNRHRPGEKRASTAKQVSSVPFLGAAGHQQLPSSWKASCSPGLVMASDSDV  
KMLLNFNVLASSDIKAALDKSAPCRRSVDHRKYLQKQLKRFSQKYSRLPRGLPGRAAEPLYLKRGESEDRPRRLLLD  
LGPDSSPGGGGGCKEKVLRNYPYREECLAKEQLPQRQHPEAAQPGQVPMRKRQLPASFWEEPPTHSHYHVGLEGLL  
GPREGPPYEGKKNCKGLEPLGPETTLVSMSPRALAEKEPLKMPGVSLVGRVNAWSSCCPFQYHGQPIYPGPLGALP  
QSPVPSLGLWRKSPAFPGELAHLCCKDVGDLGQKVCPRVVLKPIPTKPAVPPPIFNVFGYL  
PMRKRQLPASFWEEP

sp:F181B\_BOVIN [A7MB34] RecName: Full=Protein **FAM181B**;>rs:NP\_001094693  
[NP\_001094693] protein **FAM181B** [Bos taurus].>gp:BC151312\_1 [BC151312]  
LOC613623 protein [Bos taurus] 214..228

MAVQAALLSTHPFVFPFGGGSPDGLGGAFGALEKGCFFEDEETGTPAGALLAGAESGDAREATRDLLSF  
IDSASSNIKLALDKPGKSKRKNVHRKYLQKQIKRCSGLMGAAPPSPSPAADTPAKRPLAQAQTVVVPVPAHGK  
AAPRREASQAAAAASLQSRSLAALFDSLRLHVPGGADPAGVAEAVPAAGLVRGDAAGSAGGPAVPGARKVPLRARN  
LPPSFFTEPSRAGGCVCSPGPGVSLGDLEKGEAAEFFELLGPDYAGTEAGALLAAEPLDVFPAGAAVLRGPP  
ELEPGLFDPPQAMVGSLLYPEPWSAPGGPATKKPPLPAPGGGLTLNEPLRSVYPAAADSPGGDDGPGLLASFTFP  
FSDCALPPAPPQQVSYDYSAGYSRTAFAGLWRPDGAWEGAPGEEGAPRD PLRARNLPPSFFTEP

sp:F181B\_HUMAN [A6NEQ2] RecName: Full=Protein **FAM181B**;>rs:NP\_787081  
[NP\_787081] protein **FAM181B** [Homo sapiens]. 221..235

MAVQAALLSTHPFVFPFGGGSPDGLGGAFGALDKGCCFEDDETGAPAGALLSGAEGGDVREATRDLLSF  
IDSASSNIKLALDKPGKSKRKNVHRKYLQKQIKRCSGLMGAAPPSPSPAADTPAKRPLAAPSAPTVAAPAHGK  
AAPRREASQAAAAASLQSRSLAALFDSLRLHVPGGAEPAAGVAEAVPAAGLVGGAGTGAGGDVAGPAGATAIPGARK  
VPLRARNLPPSFFTEPSRAGGGCGSPGPDVSLGDLEKGAEEVEFFELLGPDYAGTEAAVLLAAEPLDVFPAGA  
SVLRGPPPELEPGLFEPVAVVGNLLYPEPWSVPGCSPTKKSPLTAPRGGLTLNEPLSPLYPAAADSPGGEDGRGH  
LASFAPFFPDICALPPPPPHQVSYDYSAGYSRTAYSSLWRSDGVWEGAPGEEGAHRD PLRARNLPPSFFTEP

sp:F181B\_MOUSE [Q80VF6] RecName: Full=Protein **FAM181B**;>gp:BC043329\_1  
[BC043329] family with sequence similarity 181, member B [Mus musculus]  
215..229

MAVQAALLSSHFFIFPFGGGADGLVSAFGSLDKGCCFEDDESGASAGALLSGSEGGDVREATRDLLSF  
IDSASSNIKLALDKPGKSKRKNVHRKYLQKQIKRCSGLMGTAPPRPASPSAADAPAKRPPGAPTVAATPAHCKAAP  
RREATQAAAAASLQSRSLAALFDSLRLHIPGGAETAGGAEAVSVPLGAASAVGDGAGTAVSSVAPGTRKVPLRAR  
NLPPSFFTEPSRVGCGGASGVPSGQGVSLGDLEKGAEEVEFFELLAPDFGSGNDSGVLMAADPLDFPAGATVLR  
GPLELESGPFEPQAMVGNLLYPEPWNTPSCPQTKKPPVAGVRRGGVTLNEPVRLLYPTALDSPGGEDAPALSSFTF  
FFPDICALPPPHQVSYDYSAGYSRAVYPSLWRPDGVWEGASGEEGGHPD PLRARNLPPSFFTEP

sp:YAP1A\_XENLA [D6C652] RecName: Full=Transcriptional coactivator YAP1-  
A; Short=Yes-associated protein 1-A; Short=xYAP  
{ECO:0000303|PubMed:21687713}; AltName: Full=Protein yorkie homolog-A;  
AltName: Full=Yes-associated protein YAP65 homolog A;>rs:NP\_001233236  
[NP\_001233236] transcriptional coactivator YAP1-A [Xenopus  
laevis].>gp:FJ979828\_1 [FJ979828] yes-associated protein 65 [Xenopus  
laevis] 54..68

MEPGSQQQPSAPAQQPPVGHQVVHVRTDSETDLEALFNAVMPKNNANLPQTLPMRMRKLPDSFFKQPQ  
PEAKSHSRQASTDGGASAGALTPQHVRHSSPASLQLAAVSPGALSPQGVVTGLAPPSAPHLRQSSYEIPDDVPLP  
PGWEMAKTPSGQRYFLNHIDQTTTWDPRKAMLSQINVTAPTSPPVQQNIMTPTGPLPDGWEQALTPEGEAYFIN  
HKNKSTSWLDPRLDPRFAMNQRLSQNAPVKAPPALPPSPQTVGLSGGNQQMRLQQLQMEKERLRLKHQELLR  
QVRPQELALRSQIPPMEQDGGTQNPVCTTGISQELRTMTMNSDFFLNSGTYHSRDESTESGLSMSSYSVPRTPD  
DFLNSVDEMDTGEAITQSTIPTQQRNRPDYLETLPGTNVDLGTLEGEAMNVEGEELMPSLQEQALSSDILNDMETV  
LAATKLDKESFTLWL PMRMRKLPDSFFKQP

sp:YAP1B\_XENLA [Q32NJ6] RecName: Full=Transcriptional coactivator YAP1-  
B; Short=Yes-associated protein 1-B; AltName: Full=Protein yorkie homolog-  
B; AltName: Full=Yes-associated protein YAP65 homolog B;>rs:NP\_001167495  
[NP\_001167495] transcriptional coactivator YAP1-B [Xenopus

laevis].>gp:BC108591\_1 [BC108591] Unknown (protein for MGC:131098) [Xenopus laevis] 54..68

MEPGSQQQPSAPGQQPPVGHQIVHVRTDSETDLETLFNAVMPKNNANVPQTLPMRMRKLPDSFFKQPE  
PKSHSRHVDQTTTWQDPRKAMLSQINITAPTSPVQONIMTPTAMNQQRSLQSAPVKSPALQPPSPGVLGSG  
GNQQMRLQQLQMEKERLRLKHQELLRQVRPQELALRSQIPPMEQDSGPPNPVCSSGISQELRTMTMNSSDPFLNS  
GTYHSRDESTDSGLSMSSYSVPRTPDFFLNSVDEMDTGEAITQSTIPTQQRFPDYLETLPGTNVDLGTLEGEAM  
NVEGEELMPSLQEQALSSDILNDMETVLAATKLDKESFLTWL PMRMRKLPDSFFKQP

sp:YAP1\_CHICK [P46936] RecName: Full=Transcriptional coactivator YAP1;  
Short=Yes-associated protein 1; AltName: Full=65 kDa Yes-associated protein  
{ECO:0000303|PubMed:8035999}; Short=YAP65 {ECO:0000303|PubMed:8035999};  
AltName: Full=Protein yorkie homolog;>rs:NP\_990574 [NP\_990574]  
transcriptional coactivator YAP1 [Gallus gallus].>gp:X76483\_1 [X76483] Yes-  
associated protein (65kDa) [Gallus gallus] 84..98

MDPGQPQPQPPQAAQPPAPQQAAPQPPGAGSGAPGGAAQPPGAGPPPAGHQIVHVVRGDSETDLEALFN  
AVMNPKGANVPHTLPMRLRKLKLPDSFFKPPPEPKAHSRQASTDAGTAGALTPQHVRHSSPASLQLGAVSPGTLTPS  
GVVTGPGAPSSQHLRQSSFEIPDDVPLPPGWEMAKTPSGQRYFLNHIDQTTTWQDPRKAMLSQMNVTAPTSPPVQ  
QNLMSASAMNQRIQSAPVKQPPPLAPQSPQGGVMGGSSSNQQQQMRLQQLQMEKERLRLKHQELLRQELALRS  
QLPTMEQDGGSQNPVSSPGMSQELRTMTTNSSDPFLNSGTYHSRDESTDSGLSMSSYSVPRTPDFFLNSVDEMDT  
GDSISQSNIPSHQNRFPDYLEAIPGTNVDLGTLEGDGMNIEGEEELMPSLQEQALSSDILNDMESVLAATKPKESF  
LTWL PMRLRKLKLPDSFFKPP

sp:YAP1\_DANRE [Q1L8J7] RecName: Full=Transcriptional coactivator YAP1;  
Short=Yes-associated protein 1; Short=zYAP {ECO:0000303|PubMed:21687713};  
AltName: Full=Protein yorkie homolog; AltName: Full=Yes-associated protein  
YAP65 homolog;>rs:NP\_001132952 [NP\_001132952] transcriptional coactivator  
YAP1 [Danio rerio].>gp:CR762425\_2 [CR762425] novel protein similar to  
vertebrate Yes-associated protein 1, 65kDa (YAP1) (si:ch211-181p1.5) [Danio  
rerio] 45..59

MDPNQHNPPAGHQIVHVVRGDSETDLEALFNAVMPKNTIVPPSVPMLRKLKLPDSFFTPPEPKSHSRQAS  
TDAGTAGTVPVPHVRAHSSPASLQLGAVSPGALTSMPGANAPPQHLRQSSYEIPDDMPLPPGWEMAKTPSGQRYF  
LNHNDQTTTWQDPRKALLQMNQAAPASPVVQQQNMNPASGPLPDGWQAITSEGEIYYINHKNKTTSWLDPRL  
DPRFAMNQQRISQSAPVKQGSQLPSSPQSGVMGNNPIRLQQIHIEKERLRIKQELLRQRPQELALRNQLPTSME  
QDGGTQNPVSSPGMQDARNMTTNSSDPFLNSGTYHSRDESTDSGLSMSSYSVPRTPDFFLNSVDEMETGDTLGP  
GSMATQPSRFPDYLDIAIPGTDVVDLGTLEGESMAVEGEELMPSLQEQALSSDILNDMESVLAATKIDKENFLTWL  
PMRLRKLKLPDSFFTPP

sp:YAP1\_DROME [Q45VV3] RecName: Full=Transcriptional coactivator yorkie  
{ECO:0000305}; AltName: Full=Protein yorkie {ECO:0000303|PubMed:16096061};  
AltName: Full=Transcriptional coactivator YAP1 homolog  
{ECO:0000305};>rs:NP\_726414 [NP\_726414] yorkie, isoform G [Drosophila  
melanogaster].>rs:NP\_001036568 [NP\_001036568] yorkie, isoform F [Drosophila  
melanogaster]. 65..79

MLTTMSASSNTNSLIEKEIDDEDMLSPIKSNLNVVRVNDQTDNDNLQALFDSVLNPGDAKRPLQLPLMR  
KLPNSFFTPPAPSHSRANSADSTYDAGSQSSINIGNKASIVQQPDGQSPIAAIPQLQIQPSPQHSRLAIHHSRAR  
SSPASLQQNYNVRARSDAANPNANPSSQQQPAGPTFPENSAQEFPSGAPASSAIDLAMNTCMSQDIPMSMQ  
TVHKKQRSYDVISPIQLNRQLGALPPGWQAKTNDGQIYYLNHTTKSTQWEDPRIQYRQQQILMAERIKQNDVL  
QTTKQTTTSTIANNLGPLPDGWQAVTESGDLYFINHIDRTTWNDRMQSGLSVLDCPDNLVSSLQIEDNLCSN  
LFNDAQAIVNPPSSHKPDLEWYKIN PLRMRKLKLPNSFFTPP

sp:YAP1\_HUMAN [P46937] RecName: Full=Transcriptional coactivator YAP1;  
Short=Yes-associated protein 1; AltName: Full=Protein yorkie homolog;  
AltName: Full=Yes-associated protein YAP65 homolog;>rs:XP\_024110885  
[XP\_024110885] transcriptional coactivator YAP1 isoform X4 [Pongo  
abelii].>rs:XP\_001151467 [XP\_001151467] transcriptional coactivator YAP1  
isoform X4 [Pan troglodytes]. 85..99

MDPGQQPPQPAPQGGQPPSPQPPQGGQPPSGPGQPAPAATQAAPQAPPAGHQIVHVVRGDSETDLEALF  
NAVMPKKTANVPQTVPMRLRKLKLPDSFFKPPPEPKSHSRQASTDAGTAGALTPQHVRHSSPASLQLGAVSPGTLTP

TGVVSGPAATPTAQHLRQSSFEIPDDVPLPAGWEMAKTSSGQRYFLNHIDQTTTWQDPRKAMLSQMNVTAPTSPP  
VQQNMMNSASGPLPDGWEQAMTQDGEIYYINHKNKTTSWLDPRLDPRFAMNQRIQSAPVKQPPPLAPQSPQGGV  
MGGSNSNQQQMRLQQLQMEKERLRLKQOELLRQAMRNINPSTANSPKCQELALRSQLPTLEQDGGTQNPVSSPG  
MSQELRTMTTNSSDPFLNSGTYHSRDESTDSGLSMSSYSVPRTPDDFLNSVDEMDTGDITINQSTLPSQQNRFPDY  
LEAIPGTNVDLGTLEGDGMNIEGEELMPSLQEQALSSDILNDMESVLAATKLDKESFLTWL

PMRLRKLPSFFKPP

sp:YAP1\_MOUSE [P46938] RecName: Full=Transcriptional coactivator YAP1;  
Short=Yes-associated protein 1; AltName: Full=Protein yorkie homolog;  
AltName: Full=Yes-associated protein YAP65 homolog;>rs:NP\_001164618  
[NP\_001164618] transcriptional coactivator YAP1 isoform 1 [Mus  
musculus].>gp:BC014733\_1 [BC014733] Yap1 protein [Mus musculus] 70..84

MEPAQQPPPPQAPQGPAPPSVSPAGTPAAPPAPPAGHQVVHVRGDSETDLEALFNAVMPKNTANVPQTV  
PMRLRKLPSFFKPPPEPKSHSRQASTDAGTAGALTPQHVAHSSPASLQLGAVSPGTLTASGVVSGPAAAPAAQH  
LRQSSFEIPDDVPLPAGWEMAKTSSGQRYFLNHNDQTTTWQDPRKAMLSQLNVPAPASPAVPQTLMNSASGPLPD  
GWEQAMTQDGEVYYINHKNKTTSWLDPRLDPRFAMNQRIQSAPVKQPPPLAPQSPQGGVLLGGSSNQQQIQLLQ  
QLQMEKERLRLKQOELFRQAIRNINPSTANAPKCQELALRSQLPTLEQDGGTNAVSSPGMSQELRTMTTNSSDP  
FLNSGTYHSRDESTDSGLSMSSYSIPRTPDFFLNSVDEMDTGDITISQSTLPSQQSRFPDYLEALPGTNVDLGTLE  
GDAMNIEGEELMPSLQEQALSSEILDVESVLAATKLDKESFLTWL PMRLRKLPSFFKPP

sp:YAP1\_ORYLA [H2LBU8] RecName: Full=Transcriptional coactivator YAP1  
{ECO:0000250|UniProtKB:P46937}; Short=Yes-associated protein 1  
{ECO:0000250|UniProtKB:P46937}; AltName: Full=Protein hirage  
{ECO:0000303|PubMed:25778702}; AltName: Full=Protein yorkie homolog  
{ECO:0000250|UniProtKB:P46937}; AltName: Full=Yes-associated protein YAP65  
homolog {ECO:0000250|UniProtKB:P46937}; 45..59

MDPSQHNPPVGHQIVHVRGDSETDLEALFNAVMPKGAIVPQSVPMRMRKLPSFFKPPPEPKSHSRQAS  
TDAGSGGVLTPHHVAHSSPASLQLGAVSGGSLSGMASAGASPOHLRQSSYEIPDDVPLPPGWEMAKTSSGQRYF  
LNHIDQTTTWQDPRKALLQLNQATPPSTVPVQQNLLSPASGPLPEGWEQAITPEGEIYYINHKNKTTSWLDPRL  
ETRYALNQQRITQSAPVKQGGPLPPNPHGGVMGGNNQMRLLQMEKERIRLQOELLRQSRPQIDLQPSTANQDA  
EHCDELALRNQLPTSMDQDSSNPVSSPMAQDARTMTANSNDPFLNSVSSGTYHSRDESTDSGLSMSSYSVPRTP  
DDFLNSVDEMDTGDPLAPSMATQPSRFPDYLDITPGTDVDLGTLEGESMAVEGEELMPSLQEQALSSDILNDMESV  
LAATKIDKESFLTWL PMRMRKLPSFFKPP

sp:YAP1\_RAT [Q2EJA0] RecName: Full=Transcriptional coactivator YAP1;  
Short=Yes-associated protein 1; AltName: Full=Protein yorkie homolog;  
AltName: Full=Yes-associated protein YAP65 homolog;>rs:XP\_006242555  
[XP\_006242555] PREDICTED: transcriptional coactivator YAP1 isoform X8  
[Rattus norvegicus].>gp:DQ376007\_1 [DQ376007] yes-associated protein  
[Rattus norvegicus] 70..84

MEPAQQPPPPQAPQGPAPPSVSPAGTPAAPPAPPAGHQVVHVRGDSETDLEALFNAVMPKNTANVPQTV  
PMRLRKLPSFFKPPPEPKSHSRQASTDAGTAGALTPQHVAHSSPASLQLGAGTLTASGVVSGPAAAPAAQH  
SSFEIPDDVPLPAGWEMAKTSSGQRYFLNHNDQTTTWQDPRKAMLSQLNVPTSASPAVPQTLMNSASGPLPDGWE  
QAMTQDGEVYYINHKNKTTSWLDPRLDPRFAMNQRIQSAPVKQPPPLAPQSPQGGVLLGGSSNQQQIQLLQQLQ  
MEKERLRLKQOELFRQELALRSQLPSLEQDGGTQNAVSSPGMTQELRTMTTNSSDPFLNSGTYHSRDESTDSGLS  
MSSYSIPRTPDFFLNSVDEMDTGDITISQSTLPSQQSRFPDYLEALPGTNVDLGTLEGDAMNIEGEELMPSLQEQAL  
SSEILDVESVLAATKLDKESFLTWL PMRLRKLPSFFKPP

rs:XP\_023971110 [XP\_023971110] transcriptional coactivator YAP1 isoform  
X8 [Physeter catodon].>rs:XP\_004283403 [XP\_004283403] PREDICTED:  
transcriptional coactivator YAP1 isoform X4 [Orcinus orca].>rs:XP\_019779332  
[XP\_019779332] PREDICTED: transcriptional coactivator YAP1 isoform X8  
[Tursiops truncatus]. 86..100

MDPGQQPPPPQAPQGGQPPAQQPPQGGPPSGPQPAPPGSQAAPQAPPAGHQIVHVRGDSETDLEAL  
FNAVMPKNTANVPQTVPMRLRKLPSFFKPPPEPKSHSRQASTDAGTAGALTPQHVAHSSPASLQLGAVSPGTLT  
PTGVVSGPAAATPTAQHLRQSSFEIPDDVPLPAGWEMAKTSSGQRYFLNHIDQTTTWQDPRKAMLSQMNVTSPTS  
PVQQNMMNSASGPLPDGWEQAMTQDGEIYYINHKNKTTSWLDPRLDPRFAMNQRIQSAPVKQPPPLAPQSPQGG  
VMGGNSNQQQMRLQQLQMEKERLRLKQOELLRQELALRSQLPTLEQDGGTQNPVSSPGMSQELRTMTTNSSDP

FLNSGTYHSRDESTDSGLSMSSYSVPRTPDDFLNSVDEMDTGDTINQSTLPSQQNRFPDYLEAIPGTNVDLGTLE  
GDGMNIEGEEELMPSLQEALSSDILNDMESVLAATKLDKESFLTWL PMRLRKLPSFFKPP

rs:XP\_028276091 [XP\_028276091] LOW QUALITY PROTEIN: protein **FAM181B**  
[Parambassis ranga]. 247..261

MQVVGHKQRVKXPALPLPLFDVLTSLVLPERSPRFSSEPLTSTLECLQQQLDEQHQRVCVKNRNETCS  
EEKTFASGNTVDATGVAAGLSRVMQAAIMNPQFMNFCFPGSVMEYDVEKSLDGSLLGEAENDEYKETTRDLL  
SFIDSASSNIKLALDKPVKSKRVNHRKYLQKQIKRCTGIITPGNVAETPGKRQGSPLTQPSPLQSKTLPKRDGV  
QASLQSKSLAALFSPVKDIRGEKAKKPLRHRNLPPSFFTEPANCSKVSSTSGMTLKDRLERGNPEAAEFFELLGP  
DYSNMVSDQDLYQSMPLRGQPELGGPDPASYDAHHLVGGLLYSEPWTS CSGPSKKGESLRSRGAQPPVYCQSEA  
ASGPIEDNALCTLAFFSFFTDCSIPQVTYDLSGGYNRANYSSL PLRHRNLPPSFFTEP

rs:XP\_028339764 [XP\_028339764] protein **FAM181A** [Physeter catodon].  
204..218

MSVPRPRTLSRAEGCCGEDHCLQPCGLWGGLSVVAQRDANGCCVPPGQLGALPWSRQPPAEPSSWKAP  
CSGPLAMASDSVDMKLLNFVNLAASSDIKAALDKSAPCRRSVDHRKYLQKQLKRFSQKYSRSLPRGLPGRRAEPLK  
SGSEDRPGRLPLDSGHRSPSPGGGCCKEKALGNPYREECLSKEQTLHGPDPEAARPGQVPMRKRQLPASFWEEP  
PTHSYVPGLEGLGPREGPPYEGKKHCKGLEPLGPETAPVPASPRAPAEKEPLKMPGVSLVGRVNAWSCCFFQYH  
GQPVYPPGPPGALPQSPHPSLGLWRKSSASPGELAHFCKDVEGPGQKVYRPVVLKPIPTKPAMPPPIFNVFYGL  
PMRKRQLPASFWEEP

rs:XP\_028370338 [XP\_028370338] transcriptional coactivator YAP1 isoform  
X6 [Phyllostomus discolor]. 85..99

MDPGQQPPPQAPQGGQPPAQQPPQGGPPSGPGQPTPPGSQAAPQAPPAGHQIVHVRGDSSETDLEALF  
NAVMPKNTANVPQTPMRLRKLPSFFKPPPEPKSHSRQASTDAGSAGALTPQHVRHSSPASLQLGAVSPGTLTP  
TGVSVPAAATPTAQHLRQSSFEIPDDVPLPAGWEMAKTSSGQRYFLNHIDQTTTWDPRKAMLSQLNVTAPTSP  
VQQNMMNSASAMNQRISQSAPVKQPPPLAPQSPQGGVLGGNSNQQQMRLQQLQMEKERLRLKQQLRQAMRN  
ISPSTANSKQELALRSQLEQDGGTQNPVSSPGMSQELRTMTTNSSDPFLNSGTYHSRDESTDSGLSMSSY  
SVPRTPDDFLNSVDEMDTGDTINQSTLPSQQNRFPDYLEAIPGTNVDLGTLEGDGMNIEGEEELMPSLQEALSSDI  
LNDMESVLAATKLDKESFLTWL PMRLRKLPSFFKPP

rs:XP\_028322905 [XP\_028322905] transcriptional coactivator YAP1-like  
isoform X1 [Gouania willdenowi]. 46..60

MDAHHAAAPPAGQQIVHVRGDSQTELEALFSAVMNPSKAARAPNSLPMRMRKLPSFFRQPDPRGHSRQA  
SSDGGVCGSLTPHHVRAHSSPASLPVNSLSTQAADVAATPIIPDDMPLPHGWEMAKTPTGQRYFLNHLDKTTTWH  
DPRLAHLQSAVAQHPIPGPPGHAHSLSNPAPNTQPQNTPETGPLEGWEQAVTADGEVYIDHINKTTTWDPS  
LVQKMNPGILGIAMQQRQEKERLRFKQGIPOQTTPQEAARRNQMPGGMDHRSQTLVPLNDVIRASNQEP  
GAHSRNESTDSGLSVSSLPRSDHMLSSVDHMDTGDVGEPPSMVLQDTMSVLPMSGEDELMPCIPEGLSSDLLMD  
METVLSGSHMDKDSLLTTL PMRMRKLPSFFRQP

rs:XP\_028251966 [XP\_028251966] protein **FAM181A** [Parambassis ranga].  
100..114

MANADSEVKTLNLFVNLAASSDIKAALDKSAPCRRSVDHRKYLQKQLKRFSQKYSRVPRCHTHRSAEHRC  
AKPVGTVHQIMTASEKANSHAQDVDSVEQVPMRKRQLPASFWEEPKLTQTKREHQHLGSKRSPVVTCEGSESEKR  
KKCYDEDTKASMSASSRRSSDKEMLKLDLTHRCVSVCGCCPFHYHGHQVLHSHIVVPHPLALWSKAAGTETE  
RFDPYGQKIHTHVVKPIPTKPTAQSPIFSVMGFI PMRKRQLPASFWEEP

rs:XP\_028372536 [XP\_028372536] protein **FAM181B** [Phyllostomus discolor].  
221..235

MAVQAALLSTHPFVFPFGGSPDGLGGAFGALDKGCCFEDDETGTPAGALLAGTEGGDVREATRDLLSF  
IDSASSNIKLALDKPGKSKRVNHRKYLQKQIKRCSGLMGAASPGPSSPGAADTPAKRALGAPSAQTVALPVHGK  
AAPRRDASQAATAASLQSRSLAALFDSLRIIPAAADSAGGSVAAPTVLGGAGAGGAVGDAAGPAGVSALAGSRK  
VPLRARNLPPSFFTEPRASGGGCGPSGCLSLCDLEKGSNLEFFELLGPDYAGATEAGVLLAAEPLDVFPTGTT  
VLRGPPMEMEPLFEPAMPVGSLLYPETWSASACPPTKKPSLATPRGGSTLNEPLRRLYPATVDSPPGEDGPGLL  
ASFSPFFSDCALPPPPPPPHQVSYEYSAGYGRTPYSSLRWPDGVWEGGPGGEGAHRD PLRARNLPPSFFTEP

rs:XP\_028422539 [XP\_028422539] protein **FAM181A** [Perca flavescens].  
104..118

MANADSEVKTLNLFVNLAASSDIKAALDKSAPCRRSVDHRKYLQKQLKRFSQKYSRVPRCHTHRSAEYGC

AKPVGTVHQSVNATEKASSDSRCVENVGSAAVEQVPMRKRQLPASFWEEP KLTQTKMEHSHLGRKKNPASTPEGSE  
NEKRKRSYDDDDAKATLSASSRRSSADKETLKLDLTSHHCVSVCGCCPFQYHGHQVLHSHIVVPHPLGLWSKTA  
ETERPEHHYGQKIHTHVVKPIPTKPTVQSPIFSVMFGFI PMRKRQLPASFWEEP

rs:XP\_028357417 [XP\_028357417] transcriptional coactivator YAP1 isoform  
X12 [Physeter catodon].>rs:XP\_004283404 [XP\_004283404] PREDICTED:  
transcriptional coactivator YAP1 isoform X8 [Orcinus orca].>rs:XP\_019779336  
[XP\_019779336] PREDICTED: transcriptional coactivator YAP1 isoform X12  
[Tursiops truncatus]. 86..100

MDPGQQQPPQPAPQGGQPPAQPQQGQPPSGPGQPAPPGSQAAPQAPPAGHQIVHVRGDSETDLEAL  
FNAVMPKNTANVPQTVPMRLRKLKLPDSFFKPPPEPKSHSRQASTDAGTAGALTPQHVRHSSPASLQLGAVSPGTLT  
PTGVVSGPAATPTAQHLRQSSFEIPDDVPLPAGWEMAKTSSGQRYFLNHIDQTTTWQDPRKAMLSQMNVTSP  
PVQQNMNSASAMNQRISQSAPVKQPPLAPQSPQGGVMGGGNSNQQQQMRLQQLQMEKERLRLKQQEELLRQELA  
LRSQLPTEQDGGTQNPVSSPGMSQELRTMTTNSSDPFLNSGTYHSRDESTDSGLSMSSYSVPRTPDDFLNSVDE  
MDTGDTINQSTLPSQQNRFPDYLEAIPGTNVLDLGTLEGDGMNIEGEEELMPSLQEQALSSDILNDMESVLAATKLDK  
ESFLTWL PMRLRKLKLPDSFFKPP

rs:XP\_028430162 [XP\_028430162] transcriptional coactivator YAP1 [Perca  
flavescens]. 45..59

MDPSQHNPPAGHQIVHVRGDSETDLEALFNAVMPKNTIVPPSVPMRMRKLKLPDSFFKPPPEPKSHSRQAS  
TDAGSGGVLTPHHVRHSSPASLQLGAVTGLSGMPPPGAAPQHLRQSSYEIPDDVPLPPGWEMAKTSPGQRYFLN  
HIDQTTTWQDPRKALLQMNQAPPSSVVPVQQNIMNPASGPLPEGWEQAITSEGEIYYINHKNKTTSWLDPRLDP  
RFALNQQRISQSAPVKQGGQLPPGIMGGNNQMRLOQIEKERLRLKQQEELLRQRPQELAIRNQLPTSMDQDGTNP  
VSSPMAQDARTMTTNSSDPFLNSGTYHSRDESTDSGLSMSSYSVPRTPDDFLNSVDEMDTGDSLPPSMATQPSRF  
PDYLDIAPGTDVLDLGTLESESMAVEGEEELMPSLQEQALSSDILNDMETVLAATKIDKESFLTWL  
PMRMRKLKLPDSFFKPP

rs:XP\_028370335 [XP\_028370335] transcriptional coactivator YAP1 isoform  
X3 [Phyllostomus discolor]. 85..99

MDPGQQQPPQPAPQGGQPPAQPQQGQPPSGPGQPTPPGSQAAPQAPPAGHQIVHVRGDSETDLEALF  
NAVMPKNTANVPQTVPMRLRKLKLPDSFFKPPPEPKSHSRQASTDAGSAGALTPQHVRHSSPASLQLGAVSPGTLTP  
TGVVSGPAATPTAQHLRQSSFEIPDDVPLPAGWEMAKTSSGQRYFLNHIDQTTTWQDPRKAMLSQLNVTAPTSP  
VQQNMNSASGPLPDGWEQAMTQDGEIYYINHKNKTTSWLDPRLDPRFAMNQRISQSAPVKQPPLAPQSPQGGV  
LGGGNSNQQQQMRLQQLQMEKERLRLKQQEELLRQVRPQELALRSQLPTEQDGGTQNPVSSPGMSQELRTMTTNS  
SDPFLNSGTYHSRDESTDSGLSMSSYSVPRTPDDFLNSVDEMDTGDTINQSTLPSQQNRFPDYLEAIPGTNVLDL  
TLEGDGMNIEGEEELMPSLQEQALSSDILNDMESVLAATKLDKESFLTWL PMRLRKLKLPDSFFKPP

rs:XP\_028363788 [XP\_028363788] protein **FAM181A** [Phyllostomus discolor].  
129..143

MASDSVDMKLLNFVNLASSDIKAALDKSAPCRRSVDHRKYLQKQLKRFSQKYSRLPRGLPGRGPEPHLK  
RGPEDRPGRLPLDAGPDASAAGGGDCKEKALGNPYGVECLSKEQALQGQNPAAARPQVPMRKRQLPASFWEEP  
PTHSYVPGLEGVLGPREGLPCEGKHKHCKGLELLGPEMALVPMSPRAPGEKEPPKMPGVALVGRVNAWSCC  
PFQYH  
GQPVYPGPPGALPQGPIPSLGLWRKSPASPGELAHFCKDVGPGQKVYRPVVLKPIPTKAMPPIIFNVFGYL  
PMRKRQLPASFWEEP

rs:XP\_028451826 [XP\_028451826] transcriptional coactivator YAP1-like  
isoform X1 [Perca flavescens]. 46..60

MDAHRGAPPAGQQIVHVRGDSQTELEALFSAVMNPSSKSSRQPPSLPMRMRKLKLPDSFFRQPD  
SRGHSRQA  
SSDGGVCGSLTPHHVRHSSPASLPVNSLSTQAADVAAIIPDDVPLPHGWEMAKTPTGQRYFLNHLDKTT  
TWHDP  
RLSQLQSAAAQHPISGTPVHAHSLSNPATTQPQININPETGPLPEGWEKAVTADGEVYIDHINKTTAW  
VDPRLA  
QKMNPGILGLALQQRQEKERLRCKQGLPQOITQEAGGRNQMPGGMDHRNTQTLVPSLDVIRAS  
NHEPTLNGAH  
SRNESTDSGLSVSSLPRTSDHVLSSVDHMDTGDSGDTSSMTLQESMPVLPMSGEELMPCIEGLSSD  
LLMDMET  
VLSGSHMDRDSLTLTWL PMRMRKLKLPDSFFRQ

rs:XP\_028357414 [XP\_028357414] transcriptional coactivator YAP1 isoform  
X10 [Physeter catodon].>rs:XP\_012393541 [XP\_012393541] PREDICTED:  
transcriptional coactivator YAP1 isoform X6 [Orcinus orca].>rs:XP\_019779334  
[XP\_019779334] PREDICTED: transcriptional coactivator YAP1 isoform X10  
[Tursiops truncatus]. 86..100

MDPGQQQPPPQPAPQGQGQPPAQPQQGQGGPPSGPGQPAPPPGSQAAPQAPPAGHQIVHVRGDSETDLEAL  
FNAVMNPKTANVPQTVPMRLRKLKLPDSFFKPPPEPKSHSRQASTDAGTAGALTPQHVRHSSPASLQLGAVSPGTLT  
PTGVVSGPAATPTAQHLRQSSFEIPDDVPLPAGWEMAKTSSGQRYFLNHIDQTTTWQDPRKAMLSQMNVTSP  
PVQONMMNSASAMNQIRISQSAPVKQPPPLAPQSPQGGVMGGGNSNQOQMRLLQQLQMEKERLRLKQELLRQAMR  
NINPSTANSPKCQELALRSQLEQDGGTQNPVSSPGMSQELRTMTTNSSDPFLNSGTYSRDESTDSGLSMSS  
YSVPRTPDFFLNSVDEMDTGDITINQSTLPSQONRFPDYLEAIPGTNVLDLGTLEGDGMNIEGEEELMPSLQEQALSSD  
ILNDMESVLAATKLDKESFLTWL PMRLRKLKLPDSFFKPP

rs:XP\_023971106 [XP\_023971106] transcriptional coactivator YAP1 isoform  
X4 [Physeter catodon].>rs:XP\_004283402 [XP\_004283402] PREDICTED:  
transcriptional coactivator YAP1 isoform X2 [Orcinus orca].>rs:XP\_019779328  
[XP\_019779328] PREDICTED: transcriptional coactivator YAP1 isoform X4  
[Tursiops truncatus]. 86..100

MDPGQQQPPPQPAPQGQGQPPAQPQQGQGGPPSGPGQPAPPPGSQAAPQAPPAGHQIVHVRGDSETDLEAL  
FNAVMNPKTANVPQTVPMRLRKLKLPDSFFKPPPEPKSHSRQASTDAGTAGALTPQHVRHSSPASLQLGAVSPGTLT  
PTGVVSGPAATPTAQHLRQSSFEIPDDVPLPAGWEMAKTSSGQRYFLNHIDQTTTWQDPRKAMLSQMNVTSP  
PVQONMMNSASGPLPDGWEQAMTQDGEIYYINHKNKTTSWLDPRLDRPFAMNQIRISQSAPVKQPPPLAPQSPQGG  
VMGGGNSNQOQMRLLQQLQMEKERLRLKQELLRQAMRNINPSTANSPKCQELALRSQLEQDGGTQNPVSSP  
GMSQELRTMTTNSSDPFLNSGTYSRDESTDSGLSMSSYSVPRTPDFFLNSVDEMDTGDITINQSTLPSQONRFP  
DYLEAIPGTNVLDLGTLEGDGMNIEGEEELMPSLQEQALSSDILNDMESVLAATKLDKESFLTWL  
PMRLRKLKLPDSFFKPP

rs:XP\_028178224 [XP\_028178224] transcriptional coactivator YAP1-like  
isoform X1 [Ostrinia furnacalis]. 44..58

MALNSDGEQKSNLVLVRVDQSDSVLQSLFDTVLKPKDSKRPLQVPLRMRQLPKSFFNPPSTGSKSPSVSH  
SRENSADSAFGSSSATGAAPVSHSRAHSSPASLQOQTYAAGQONQPPPLHQQHAKHRSYDVGSHLQDDLGLPLPAGW  
EQARTPEGQIYYLNHITKTTTWDDPRKTLAAQSVASSVQHQAETLLPQPASAPAITPAATPAAKSTSSNTTDDP  
LGPLPEGWEQATTPEGETYFINHAARTTSWFDPRIPQHLQRTPAANAGAAGGGWANASLQACQQKIRLQSLQLER  
DRLKQRQEQEIRLQOELMARQSSSIMSSLASSAGAAASTDLSLDPFLSGLSEHQEQESADSGLGMVPRVGEQDGL  
FSIPHTPEDFLAGMDDRMDCSSEAGANMDSADMAIGDNLDDSTDDLVPVSLQLENEFTNDILLDDVQSLINSTPSKPD  
NVLTWL PLRMRQLPKSFFNPP

rs:XP\_028370339 [XP\_028370339] transcriptional coactivator YAP1 isoform  
X7 [Phyllostomus discolor]. 85..99

MDPGQQQPPPQPAPQGQGQPPAQPQQGQGGPPSGPGQPAPPPGSQAAPQAPPAGHQIVHVRGDSETDLEALF  
NAVMNPKTANVPQTVPMRLRKLKLPDSFFKPPPEPKSHSRQASTDAGSAGALTPQHVRHSSPASLQLGAVSPGTLT  
TGVVSGPAATPTAQHLRQSSFEIPDDVPLPAGWEMAKTSSGQRYFLNHIDQTTTWQDPRKAMLSQNLVTA  
PTSPPVQONMMNSASAMNQIRISQSAPVKQPPPLAPQSPQGGVLLGGGNSNQOQMRLLQQLQMEKERLRLKQELLRQV  
RPELALRSQLEQDGGTQNPVSSPGMSQELRTMTTNSSDPFLNSGTYSRDESTDSGLSMSSYSVPRTPDFFLNS  
VDEMDTGDITINQSTLPSQONRFPDYLEAIPGTNVLDLGTLEGDGMNIEGEEELMPSLQEQALSSDILNDMESV  
LAATKLDKESFLTWL PMRLRKLKLPDSFFKPP

rs:XP\_028322906 [XP\_028322906] transcriptional coactivator YAP1-like  
isoform X2 [Gouania willdenowii]. 46..60

MDAHHAAAPPAGQQIVHVRGDSQTELEALFSAVMNPSKAARAPNSLPMRMRKLKLPDSFFRQPDPRGHSRQA  
SSDGGVCGSLTPHHVRHSSPASLPVNSLSTQAADVAATPIIPDDMPLPHGWEMAKTPTGQRYFLNHLDKTTTWH  
DPRLAHLQSAVAQHPIPGPPGHAHSLSNPAPNTQPQNITPETVQKMNPGILGIAMQORQEKERLRFKQIGIPQQT  
TPEEAARRNQMPGGMDHRSQAQTLVPNLDVIRIRASNQEPNLNGAHSRNESTDSGLSVSSLPRTSDHMLSSVDHMDT  
GDVGEPPSMVLQDTMSVLPMSSEGEDELMPCEIPEGLSSDLLMDMETVLSGSHMDKDSLTLTWL  
PMRMRKLKLPDSFFRQP

rs:XP\_023971108 [XP\_023971108] transcriptional coactivator YAP1 isoform  
X6 [Physeter catodon].>rs:XP\_012393539 [XP\_012393539] PREDICTED:  
transcriptional coactivator YAP1 isoform X3 [Orcinus orca].>rs:XP\_019779330  
[XP\_019779330] PREDICTED: transcriptional coactivator YAP1 isoform X6  
[Tursiops truncatus]. 86..100

MDPGQQQPPPQPAPQGQGQPPAQPQQGQGGPPSGPGQPAPPPGSQAAPQAPPAGHQIVHVRGDSETDLEAL  
FNAVMNPKTANVPQTVPMRLRKLKLPDSFFKPPPEPKSHSRQASTDAGTAGALTPQHVRHSSPASLQLGAVSPGTLT  
PTGVVSGPAATPTAQHLRQSSFEIPDDVPLPAGWEMAKTSSGQRYFLNHIDQTTTWQDPRKAMLSQMNVTSP  
TSP

PVQQNMNSASGPLPDGWEQAMTQDGEIYYINHKNKTTSWLDPRLDPRFAMNQRISSQAPVKQPPPLAPQSPQGG  
VMGGGNSNQQQMRLQQLQMEKERLRLKQQELLRQVRPQELALRSQLPTLEQDGGTQNPVSSPGMSQELRTMTTN  
SSDPFLNSGTYHSRDESTDSGLSMSSYSVPRTPDFFLNSVDEMDTGDITINQSTLPSQQNRFPDYLEAIPGTNVDL  
GTLEGDGMNIEGELMPSLQEQALSSDILNDMESVLAATKLDKESFLTWL PMRLRKLPSDFFKPP

rs:XP\_028277482 [XP\_028277482] transcriptional coactivator YAP1-like  
isoform X2 [Parambassis ranga]. 42..56

MDAPPAGQQIVHVRGDSQTELEALFSAVMNPSKAARQPQSLPMRMRKLPSDFFRQPDPRGHSRQASSDG  
GPCGSLTPHHVRAHSSPASLPVNSLSTQAADVAATPIIPDDVPLPHGWEMAKTPTGQRYFLNHLEKTTTWHDPRL  
SQLQSAQAQHPITGTTPVHAHSLSNPAPTTQPQINPETAQKMNPGNLGLAMLQRQEKERLRCKQGLPQLTPQDAG  
GRNQIPSGMDHRSQAQTHVPSLDVRIIRGSNHEPTLNGAHSRNESTDSGLSVSSLPRTSDHMLSSVDHMDTGDSDG  
APSMTLQESMPVLPMSSEGEELMPCIEGLSSDLLMDMETVLSGSHMDRDSLLTWL PMRMRKLPSDFFRQP

rs:XP\_028138151 [XP\_028138151] transcriptional coactivator YAP1-A-like  
isoform X1 [Diabrotica virgifera virgifera]. 41..55

MALNQDEAKQVVRVDQDSETDLQALFDSVLKPDSCRPLQVPWMSMRKLPSDFFNPPSTGSKSINHSRENS  
VDSAFGGGATGATSVNSVPLQTAHHRHRAHSSPASLQOQTYAVGQQQAPVHHIKQRSYDVASKSEDNTPLPPGWEQAR  
TPEGQVYYLNHTTRTTTWEDPRKSLAAQAAAQHQSAEQLLTSHQLSHQPSPNSNTTAKVNTDVLGLPLPEGWEQ  
AQTPEGEIIYFINHQTRTTSWFDPRIPTHLOQRTSGGNIIGSNWHSPTLSSSPAKAQQIRLQQLQMERERLKRQQ  
EIRRQQEIMMRSSSDLPVMDPFLSSLDHRSRQESGDSGLGMGTYSMPHTPEDFLANMDDNMDVGSSESHTMDTPD  
ISTLSDNIDSTDDLVPRTLQLGEEEFMPLDVQSLINPPTTRPDNLIWL PWSMRKLPSDFFNPP

rs:XP\_028393807 [XP\_028393807] uncharacterized protein LOC114518090  
[Dendronephthya gigantea]. 106..120

MAEIINEDKLTVTNDDQDKDFNQWRQPKTPESPKEEIKSNSPEHSSVQNKSLCGVKDLSRLSRKRRT  
ILSVKGARICSRKRSEDKPFGSGHDSKPRTSKKEPLPMKQRSPLQSFWLQPNISKSSMAQNTYSRLPPLFPEDH  
NPKELMERPVTPPEERREHQPRPPKRVVTSEPDTELLFSLFKAVTGNPLEKKLIKRGPKKIHSEKLPVSHED  
DPCMVENLTGRLFPQLSLENHRSADARLASLTVHAGNHCIQLPTLAVDNNYPQMLSQLAQVL  
PMKQRSPLQSFWLQP

rs:XP\_028138152 [XP\_028138152] transcriptional coactivator YAP1-like  
isoform X2 [Diabrotica virgifera virgifera]. 41..55

MALNQDEAKQVVRVDQDSETDLQALFDSVLKPDSCRPLQVPWMSMRKLPSDFFNPPSTGSKSINHSRENS  
VDSAFGGGATGATSVNSVPLQTAHHRHRAHSSPASLQOQTYAVGQQQAPVHHIKQRSYDVASKSEDNTPLPPGWEQAR  
TPEGQVYYLNHTTRTTTWEDPRKSLAAQAAAQHQSAEQLLTSHQLSHQPSPNSNTTTHLQOQRTSGGNIIGSNWH  
SPTLSSSPAKAQQIRLQQLQMERERLKRQQEIRRQQEIMMRSSSDLPVMDPFLSSLDHRSRQESGDSGLGMGT  
YSMPHTPEDFLANMDDNMDVGSSESHTMDTPDISTLSDNIDSTDDLVPRTLQLGEEEFMPLDVQSLINPPTTRPDN  
LIWL PWSMRKLPSDFFNPP

rs:XP\_028320858 [XP\_028320858] transcriptional coactivator YAP1 [Gouania  
willdenowii]. 45..59

MDPSQHNPAGHQIVHVRGDSETDLEALFNAVMPKNTIVPHSVPMRMRKLPSDFFKPPEPKSHSRQAS  
TDAGSAGVLTPHHVRAHSSPASLQLGAVSAGSLSGMAPAGASPQHLRQSSYEIPDDVPLPAGWEMAKTASGQRYF  
LNHIEQTTTWQDPRKALLQMNQAAPASTVPVQQNLNMPNTNGALPEGWEQAITSEGEIYYINHKNKTTSWLDPRL  
EPRYALNQQRITQSAPGKQQLPPHSGVMGGNNQMLRPQLEKDRLRMKPQELLRQRQELALRNQLPTSMEQDGG  
TNPVSSPMAQDARTMTANSNDPFLNSGTYHSRDESTDSGLSMSSYSVPRTPDFFLNSVDEMDTGDPLPPSMATQP  
SRFPDYLDIAPGTDVLDLTLESESMVVEGEELMPSLQEQALSSDILNDMESVLAATKIDKESFLTWL  
PMRMRKLPSDFFKPP

rs:XP\_028357415 [XP\_028357415] transcriptional coactivator YAP1 isoform  
X11 [Physeter catodon].>rs:XP\_012393542 [XP\_012393542] PREDICTED:  
transcriptional coactivator YAP1 isoform X7 [Orcinus orca].>rs:XP\_019779335  
[XP\_019779335] PREDICTED: transcriptional coactivator YAP1 isoform X11  
[Tursiops truncatus]. 86..100

MDPGQQQPPQPAPQGGQPPAQPQGGQPPSGPGQPAPPGSQAAPQAPPAGHQIVHVRGDSETDLEAL  
FNAVMPKNTANVPQTPMRLRKLPSDFFKPPEPKSHSRQASTDAGTAGALTPQHVRHSSPASLQLGAVSPGTLT  
PTGVVSGPAATPTAQHLRQSSFEIPDDVPLPAGWEMAKTSSGQRYFLNHIDQTTTWQDPRKAMLSQMNVTSTPTSP  
PVQQNMNSASAMNQRISSQAPVKQPPPLAPQSPQGGVMGGGNSNQQQMRLQQLQMEKERLRLKQQELLRQVRP  
QELALRSQLPTLEQDGGTQNPVSSPGMSQELRTMTTNSSDPFLNSGTYHSRDESTDSGLSMSSYSVPRTPDFFLNS

SVDEMDTGDITINQSTLPSQQNRFPDYLEAIPGTNVDLGTLEGGDMNIEGEEELMPSLQEQALSSDILNDMESVLAAT  
KLDKESFLTWL PMRLRKLPSFFKPP

rs:XP\_028357413 [XP\_028357413] transcriptional coactivator YAP1 isoform  
X9 [Physeter catodon].>rs:XP\_012393540 [XP\_012393540] PREDICTED:  
transcriptional coactivator YAP1 isoform X5 [Orcinus orca].>rs:XP\_019779333  
[XP\_019779333] PREDICTED: transcriptional coactivator YAP1 isoform X9  
[Tursiops truncatus]. 86..100

MDPGQQQPPPPQAPQGGQPPAQPQQGPPSGPGQPAPPGSQAAPQAPPAGHQIVHVRGDSETDLEAL  
FNAVMNPKTANVPQTVPMRLRKLPSFFKPPPEPKSHSRQASTDAGTAGALTPQHVRHSSPASLQLGAVSPGTLT  
PTGVVSGPAATPTAQHLRQSSFEIPDDVPLPAGWEMAKTSSGQRYFLNHIDQTTTWQDPRKAMLSQMNVTSP  
PVQQNMMNSASAMNQRISQSAPVKQPPPLAPQSPQGGVMGGGNSNQQQQMRLQQLQMEKERLRLKQEQELLRQVRP  
QAMRNINPSTANSPKCQELALRSQLELRTQDGGTQNPVSSPGMSQELRTMTTNSSDPFLNSGTYSRDESTDSGL  
SMSSYSVPRTPDFFLNSVDEMDTGDITINQSTLPSQQNRFPDYLEAIPGTNVDLGTLEGGDMNIEGEEELMPSLQEQ  
ALSSDILNDMESVLAATKLDKESFLTWL PMRLRKLPSFFKPP

rs:XP\_023971104 [XP\_023971104] transcriptional coactivator YAP1 isoform  
X2 [Physeter catodon].>rs:XP\_012393538 [XP\_012393538] PREDICTED:  
transcriptional coactivator YAP1 isoform X1 [Orcinus orca].>rs:XP\_019779326  
[XP\_019779326] PREDICTED: transcriptional coactivator YAP1 isoform X2  
[Tursiops truncatus]. 86..100

MDPGQQQPPPPQAPQGGQPPAQPQQGPPSGPGQPAPPGSQAAPQAPPAGHQIVHVRGDSETDLEAL  
FNAVMNPKTANVPQTVPMRLRKLPSFFKPPPEPKSHSRQASTDAGTAGALTPQHVRHSSPASLQLGAVSPGTLT  
PTGVVSGPAATPTAQHLRQSSFEIPDDVPLPAGWEMAKTSSGQRYFLNHIDQTTTWQDPRKAMLSQMNVTSP  
PVQQNMMNSASGPLPDGWEQAMTQDGEIYYINHKNKTTSWLDPRLDPRFAMNQRISQSAPVKQPPPLAPQSPQGG  
VMGGGNSNQQQQMRLQQLQMEKERLRLKQEQELLRQVRPQAMRNINPSTANSPKCQELALRSQLELRTQDGGTQNP  
VSSPGMSQELRTMTTNSSDPFLNSGTYSRDESTDSGLSMSSYSVPRTPDFFLNSVDEMDTGDITINQSTLPSQQN  
RFPDYLEAIPGTNVDLGTLEGGDMNIEGEEELMPSLQEQALSSDILNDMESVLAATKLDKESFLTWL  
PMRLRKLPSFFKPP

rs:XP\_028293640 [XP\_028293640] protein **FAM181A** [Gouania willdenowii].  
99..113

MAHADSEVKTLNLFVNLAASSDIKAALDKSAPCRRSVDHRKYLQKQLKRFSQKYSRVTRYHRSAEYRCKT  
PVVTTVPSMTGSSGAQEAETVGGAAVEQVPMRKRQLPASFWEEPRLIENKKNDSVPGLKGRPEAPPEATETTKRR  
GNFNDPKAPIGAPTRRSPEAKETLKLDSLSSHCLSMYGCCPCQYHGHQVLHSHIIVPHLPVGLWSKAVETETERA  
EHIYGPKFHHTHVVKPIPTKPSHSSIYSVFGFI PMRKRQLPASFWEEP

rs:XP\_028370333 [XP\_028370333] transcriptional coactivator YAP1 isoform  
X1 [Phyllostomus discolor]. 85..99

MDPGQQQPPPPQAPQGGQPPAQPQQGPPSGPGQPPTPPGSQAAPQAPPAGHQIVHVRGDSETDLEALF  
NAVMPNPKTANVPQTVPMRLRKLPSFFKPPPEPKSHSRQASTDAGSAGALTPQHVRHSSPASLQLGAVSPGTLT  
TGVVSGPAATPTAQHLRQSSFEIPDDVPLPAGWEMAKTSSGQRYFLNHIDQTTTWQDPRKAMLSQLNVTAPTSP  
VQQNMMNSASGPLPDGWEQAMTQDGEIYYINHKNKTTSWLDPRLDPRFAMNQRISQSAPVKQPPPLAPQSPQGGV  
LGGGNSNQQQQMRLQQLQMEKERLRLKQEQELLRQVRPQAMRNINPSTANSPKCQELALRSQLELRTQDGGTQNPV  
SSPGMSQELRTMTTNSSDPFLNSGTYSRDESTDSGLSMSSYSVPRTPDFFLNSVDEMDTGDITINQSTLPSQQNR  
FPDYLEAIPGTNVDLGTLEGGDMNIEGEEELMPSLQEQALSSDILNDMESVLAATKLDKESFLTWL  
PMRLRKLPSFFKPP

rs:XP\_023971107 [XP\_023971107] transcriptional coactivator YAP1 isoform  
X5 [Physeter catodon].>rs:XP\_019779329 [XP\_019779329] PREDICTED:  
transcriptional coactivator YAP1 isoform X5 [Tursiops  
truncatus].>rs:XP\_026943624 [XP\_026943624] transcriptional coactivator YAP1  
isoform X5 [Lagenorhynchus obliquidens]. 86..100

MDPGQQQPPPPQAPQGGQPPAQPQQGPPSGPGQPAPPGSQAAPQAPPAGHQIVHVRGDSETDLEAL  
FNAVMNPKTANVPQTVPMRLRKLPSFFKPPPEPKSHSRQASTDAGTAGALTPQHVRHSSPASLQLGAVSPGTLT  
PTGVVSGPAATPTAQHLRQSSFEIPDDVPLPAGWEMAKTSSGQRYFLNHIDQTTTWQDPRKAMLSQMNVTSP  
PVQQNMMNSASGPLPDGWEQAMTQDGEIYYINHKNKTTSWLDPRLDPRFGKAMNQRISQSAPVKQPPPLAPQSPQ  
GGVMGGGNSNQQQQMRLQQLQMEKERLRLKQEQELLRQVRPQELALRSQLELRTQDGGTQNPVSSPGMSQELRTMT



TNSSDPFLNSGTYHSRDESTDSGLSMSSYSVPRTPDDFLNSVDEMDTGDTINQSTLPSQQNRFPDYLEAIPGTNV  
DLGTLEGDGMNIEGELMPSLQEQALSSDILNDMESVLAATKLDKESFLTWL PMRLRKLPSFFKPP

rs:XP\_028321398 [XP\_028321398] protein **FAM181B** [Gouania willdenowi].  
156..170

MAVQTAIMNPQFMNFCFPASVMEYEVEKSLDGSLLAEAETDEEYKETTDRLLSFIDSASSNIKLALDKP  
VKSKRKVNHRKYLQKQIKRCTGIIAPGNVAEAPVKRHGSSPPAQPSFLQSKTLPKRDLGIQANLQSKSLAALFSPV  
KDVRGEKTKKPLRHRNLPPSFFTEPAKCPKVSSTSGMTLKDRLGRNPEAVDFFELLGPDYSNMVSEQDFYQNSS  
SGRVQPELGGPDPASYDIHHLASGLLYAESWTNCSGTAKKLEESLSAGSAQPPLYCQAETSSSPMDDSLAFPHFF  
TDCSIPQVTYDGGYNRATYSSL PLRHRNLPPSFFTEP

rs:XP\_023971103 [XP\_023971103] transcriptional coactivator YAP1 isoform  
X1 [Physeter catodon].>rs:XP\_019779325 [XP\_019779325] PREDICTED:  
transcriptional coactivator YAP1 isoform X1 [Tursiops  
truncatus].>rs:XP\_026943620 [XP\_026943620] transcriptional coactivator YAP1  
isoform X1 [Lagenorhynchus obliquidens]. 86..100

MDPGQQQPPQPAPQGGQPPAQPPQGGQPPSGPGQPAPPQSQAAPQAPPAGHQIVHVRGDSETDLEAL  
FNAVMPKNTANVPQTVPMRLRKLPSFFKPPPEPKSHSRQASTDAGTAGALTPQHVRHSSPASLQLGAVSPGTLT  
PTGVVSGPAATPTAQHLRQSSFEIPDDVPLPAGWEMAKTSSGQRYFLNHIDQTTTWQDPRKAMLSQMNVTSTPTSP  
PVQQNMNSASGPLPDGWEQAMTQDGEIYYINHKNKTTSWLDPRLDPRFGKAMNQRISQSAPVKQPPPLAPQSPQ  
GGVMGGNSNQQQMRLQQLQMEKERLRLKQEQELLRQVRPQAMRNINPSTANSPKCQELALRSQLPTLEQDGGTQ  
NPVSSPGMSQELRTMTTNSDDPFLNSGTYHSRDESTDSGLSMSSYSVPRTPDDFLNSVDEMDTGDTINQSTLPSQ  
QNRFPDYLEAIPGTNVDLGTLEGDGMNIEGELMPSLQEQALSSDILNDMESVLAATKLDKESFLTWL  
PMRLRKLPSFFKPP

rs:XP\_028451827 [XP\_028451827] transcriptional coactivator YAP1-like  
isoform X2 [Perca flavescens]. 46..60

MDAHRGAPPAGQQIVHVRGDSQTELEALFSAVMNPSSKSRQPPSLPMRMRKLPSFFRQPDSTRGHSRQA  
SSDGGVCGSLTPHHVRAHSSPASLPVNSLSTQAADVAAIIPDDVPLPHGWEMAKTPTGQRYFLNHLDKTTTWHDP  
RLSQLQSAQAHPISGTPVHAHSLSNPAPTTPQPNINPETAQKMNPGLGLALQQRQEKERLRCKQGLPQQITQE  
AGGRNQMPGGMDHNRNTQTLVPSLDVRIIRASNHEPTLNGAHSRNESTDSGLSVSSLPRTSDHVLSSVDHMDTGDS  
GDTSSMTLQESMPVLPMSSEGEELMPCIEPEGLSSDLLMDMETVLSGSHMDRDSLTLWL PMRMRKLPSFFRQP

rs:XP\_028178226 [XP\_028178226] transcriptional coactivator YAP1-like  
isoform X3 [Ostrinia furnacalis]. 44..58

MALNSDGEQKSNLVLVLDQSDSVLQSLFDTVLKPDSCRPLQVPLRMRQLPKSFFNPPSTGSKSPSVSH  
SRENSADSAFGSSSATGAAPVSHSRAHSSPASLQQTYAAGQQNQPPQLHGHAKHRSYDVGSHLQDDLGLPLPAGW  
EQARTPEGQIYYLNHITKTTTWDDPRKTLAAQSVASSVQHQAETLLPQPASAPAITPAATPAAKSTSSNTTTDP  
LGPLPEGWEQATTPEGETYFINHAARTTSWFDPRIPQHLQRTPAANAGAAGGGWANASLQACQQKIRLQSLQLER  
DRLKQRQEQEIRLQQLMARQSSSIMSSLASSAGAAASTDLSLDPFLSGLSEHQEQESADSGLMAVPRVGEQDGL  
FSIPHTPEDFLAGMDDRMDCSSEAGANMDSADMAIGDNLDDSTDDLLNEFTNDILLDDVQSLINSTPSKPDNVLTW  
L PLRMRQLPKSFFNPP

rs:XP\_028370336 [XP\_028370336] transcriptional coactivator YAP1 isoform  
X4 [Phyllostomus discolor]. 85..99

MDPGQQQPPQPAPQGGQPPAQPPQGGQPPSGPGQPPTPPQSQAAPQAPPAGHQIVHVRGDSETDLEALF  
NAVMPKNTANVPQTVPMRLRKLPSFFKPPPEPKSHSRQASTDAGSAGALTPQHVRHSSPASLQLGAVSPGTLTP  
TGVVSGPAATPTAQHLRQSSFEIPDDVPLPAGWEMAKTSSGQRYFLNHIDQTTTWQDPRKAMLSQLNVTAPTSP  
VQQNMNSASGPLPDGWEQAMTQDGEIYYINHKNKTTSWLDPRLDPRFAMNQRISQSAPVKQPPPLAPQSPQGGV  
LGGGNSNQQQMRLQQLQMEKERLRLKQEQELLRQELALRSQLPTLEQDGGTQNPVSSPGMSQELRTMTTNSDDP  
LNSGTYHSRDESTDSGLSMSSYSVPRTPDDFLNSVDEMDTGDTINQSTLPSQQNRFPDYLEAIPGTNVDLGTLEG  
DGMNIEGELMPSLQEQALSSDILNDMESVLAATKLDKESFLTWL PMRLRKLPSFFKPP

rs:XP\_028178225 [XP\_028178225] transcriptional coactivator YAP1-like  
isoform X2 [Ostrinia furnacalis]. 44..58

MALNSDGEQKSNLVLVLDQSDSVLQSLFDTVLKPDSCRPLQVPLRMRQLPKSFFNPPSTGSKSPSVSH  
SRENSADSAFGSSSATGAAPVSHSRAHSSPASLQQTYAAGQQNQPPQLHGHAKHRSYDVGSHLQDDLGLPLPAGW  
EQARTPEGQIYYLNHITKTTTWDDPRKTLAAQSVASSVQHQAETLLPQPASAPAITPAATPAKSTSSNTTTDPL  
GPLPEGWEQATTPEGETYFINHAARTTSWFDPRIPQHLQRTPAANAGAAGGGWANASLQACQQKIRLQSLQLERD

RLKQRQQEIRLQQELMARQSSSIMSSLASSAGAAASTDLSLDPFLSGLSEHQEQESADSGLGMAVPRVGEGLF  
SIPHTPEDFLAGMDDRMDCSSEAGANMDSADMAIGDNLDDSTDDLVPSSLQNEFTNDILLDDVQSLINSTPSKPDN  
VLTWL PLRMRQLPKSFFNPP

rs:XP\_023971109 [XP\_023971109] transcriptional coactivator YAP1 isoform  
X7 [Physeter catodon].>rs:XP\_019779331 [XP\_019779331] PREDICTED:  
transcriptional coactivator YAP1 isoform X7 [Tursiops  
truncatus].>rs:XP\_026943627 [XP\_026943627] transcriptional coactivator YAP1  
isoform X7 [Lagenorhynchus obliquidens]. 86..100

MDPGQQQPPPPQAPQGGQPPAQQPPQGGPPSGPGQPAPPGSQAAPQAPPAGHQIVHVRGDSETDLEAL  
FNAVMPKNTANVPQTVPMRLRKLKLPDSFFKPPPEPKSHSRQASTDAGTAGALTPQHVRHSSPASLQLGAVSPGTLT  
PTGVVSGPAATPTAQHLRQSSFEIPDDVPLPAGWEMAKTSSGQRYFLNHIDQTTTWQDPRKAMLSQMNVTSP  
PVQQNMMNSASGPLPDGWEQAMTQDGEIYYINHKNKTTSWLDPRLDPRFGKAMNQRISQSAPVKQPPPLAPQSPQ  
GGVMGGGNSNQQQMRLQQLQMEKERLRLKQOELLRQELALRSQLPTLEQDGGTQNPVSSPGMSQELRTMTTNS  
DPFLNSGTYHSRDESTDSGLSMSSYSVPRTPDFFLNSVDEMDTGDTINQSTLPSQQNRFPDYLEAIPGTNVDLGT  
LEGDGMNIEGEEELMPSLQEQALSSDILNDMESVLAATKLDKESFLTWL PMRLRKLKLPDSFFKPP

rs:XP\_028370334 [XP\_028370334] transcriptional coactivator YAP1 isoform  
X2 [Phyllostomus discolor]. 85..99

MDPGQQQPPPPQAPQGGQPPAQQPPQGGPPSGPGQPTPPGSQAAPQAPPAGHQIVHVRGDSETDLEALF  
NAVMPKNTANVPQTVPMRLRKLKLPDSFFKPPPEPKSHSRQASTDAGSAGALTPQHVRHSSPASLQLGAVSPGTLT  
TGVVSGPAATPTAQHLRQSSFEIPDDVPLPAGWEMAKTSSGQRYFLNHIDQTTTWQDPRKAMLSQLNVTAPTSP  
VQQNMMNSASGPLPDGWEQAMTQDGEIYYINHKNKTTSWLDPRLDPRFAMNQRISQSAPVKQPPPLAPQSPQGGV  
LGGGNSNQQQMRLQQLQMEKERLRLKQOELLRQAMRNISPSTANSPKCQELALRSQLPTLEQDGGTQNPVSSPG  
MSQELRTMTTNSSDPFLNSGTYHSRDESTDSGLSMSSYSVPRTPDFFLNSVDEMDTGDTINQSTLPSQQNRFPDY  
LEAIPGTNVDLGTLEGDGMNIEGEEELMPSLQEQALSSDILNDMESVLAATKLDKESFLTWL  
PMRLRKLKLPDSFFKPP

rs:XP\_023971105 [XP\_023971105] transcriptional coactivator YAP1 isoform  
X3 [Physeter catodon].>rs:XP\_019779327 [XP\_019779327] PREDICTED:  
transcriptional coactivator YAP1 isoform X3 [Tursiops  
truncatus].>rs:XP\_026943622 [XP\_026943622] transcriptional coactivator YAP1  
isoform X3 [Lagenorhynchus obliquidens]. 86..100

MDPGQQQPPPPQAPQGGQPPAQQPPQGGPPSGPGQPAPPGSQAAPQAPPAGHQIVHVRGDSETDLEAL  
FNAVMPKNTANVPQTVPMRLRKLKLPDSFFKPPPEPKSHSRQASTDAGTAGALTPQHVRHSSPASLQLGAVSPGTLT  
PTGVVSGPAATPTAQHLRQSSFEIPDDVPLPAGWEMAKTSSGQRYFLNHIDQTTTWQDPRKAMLSQMNVTSP  
PVQQNMMNSASGPLPDGWEQAMTQDGEIYYINHKNKTTSWLDPRLDPRFGKAMNQRISQSAPVKQPPPLAPQSPQ  
GGVMGGGNSNQQQMRLQQLQMEKERLRLKQOELLRQAMRNINPSTANSPKCQELALRSQLPTLEQDGGTQNPV  
SPGMSQELRTMTTNSSDPFLNSGTYHSRDESTDSGLSMSSYSVPRTPDFFLNSVDEMDTGDTINQSTLPSQQNR  
PDYLEAIPGTNVDLGTLEGDGMNIEGEEELMPSLQEQALSSDILNDMESVLAATKLDKESFLTWL  
PMRLRKLKLPDSFFKPP

rs:XP\_028429740 [XP\_028429740] protein **FAM181B** [Perca flavescens].  
153..167

MAVQTAIMNPQFMNFCFPCSVMEYEVEKSLDGSLLGEAENDEYKETTDRDLSFIDSASSNIKLALDKP  
VSKSRKVNHRKYLQKQIKRGTGNIPTGNVAEVPVKRQGSPLAQPLQSKTLPKRDGVQANLQSKSLAALFSPVKDI  
RGEKAKKPLRHRNLPPSFFTEPANCSKVSSTSGMTLKDRLERGNPEAAEFFELLGPDYSNMVSDQDLYQSMPVVRV  
QPENGGPDASYDAHHLVGGLLYSEPWTSCSVPTKKVGENLRTGPTQPPVYCHSEAASGSIEDNALCTLAFPNFF  
TDCSIPQVTYDLSGGYNRANYSSL PLRHRNLPPSFFTEP

rs:XP\_028370337 [XP\_028370337] transcriptional coactivator YAP1 isoform  
X5 [Phyllostomus discolor]. 85..99

MDPGQQQPPPPQAPQGGQPPAQQPPQGGPPSGPGQPTPPGSQAAPQAPPAGHQIVHVRGDSETDLEALF  
NAVMPKNTANVPQTVPMRLRKLKLPDSFFKPPPEPKSHSRQASTDAGSAGALTPQHVRHSSPASLQLGAVSPGTLT  
TGVVSGPAATPTAQHLRQSSFEIPDDVPLPAGWEMAKTSSGQRYFLNHIDQTTTWQDPRKAMLSQLNVTAPTSP  
VQQNMMNSASAMNQRISQSAPVKQPPPLAPQSPQGGVLGGGNSNQQQMRLQQLQMEKERLRLKQOELLRQVRPQ  
AMRNISPSTANSPKCQELALRSQLPTLEQDGGTQNPVSSPGMSQELRTMTTNSSDPFLNSGTYHSRDESTDSGLS  
MSSYSVPRTPDFFLNSVDEMDTGDTINQSTLPSQQNRFPDYLEAIPGTNVDLGTLEGDGMNIEGEEELMPSLQEQAL  
SSDILNDMESVLAATKLDKESFLTWL PMRLRKLKLPDSFFKPP

rs:XP\_028178227 [XP\_028178227] WW domain-containing transcription regulator protein 1-like isoform X4 [Ostrinia furnacalis]. 44..58

MALNSDGEQKSNLVLVRVDQSDSVLQSLFDTVLKPKDSKRPLQVPLRMRQLPKSFFNPPSTGSKSPSVSH  
SRENSADSAFGSSSATGAAPVSHSRAHSSPASLQQTYYAAGQONQPOPLHHQHAKHRSYDVGSHLQDDLGLPLPAGW  
EQARTPEGQIYYLNHITKTTTWDPRKTLAAQSVASSVQHQAETLLPQPASAPAITPAATPAAKSTSSNTTDF  
LGPLPEGWEQATTPEAQHLQRTPAANAGAAGGGWANASLQACQKIRLQSLQLERDRLKQRQQEIRLQQEELMARQ  
SSSIMSSLASSAGAAASTDLSLDFLSEHQRQESADSGLGMVPRVGEVGDGLFSIPHTPEDFLAGMDDRMDC  
SSEAGANMDSADMAIGDNLDDSTDDLVPVSLQNEFTNDILLDDVQSLINSTPSKPDNVLTLW  
PLRMRQLPKSFFNPP

rs:XP\_007119750 [XP\_007119750] protein **FAM181B** [Physeter catodon].>tr:A0A2Y9FCD7\_PHYCD [A0A2Y9FCD7] SubName: Full=protein **FAM181B** {ECO:0000313|RefSeq:XP\_007119750.2}; 221..235

MAVQAALLSTHFPVFGFGGSPDGLGGAFGALDKGCCFEDEETGTPAGALLAGAEGGDVREATRDLISF  
IDSASSNIKLALDKPGKSKRKNVHRKYLQKQIKRCSGLMGAAPPSPGAAADTPAKRPLAAASAQTVPVQAHGK  
AVPRREASQAAAAASLQSRSLAALFDSLHVPGAGDPAGSAEAAAPAAGLVGAGAGGVGGDAAGAAGGPAVPGARK  
VPLRARNLPPSFFTEPSRAGGGGCGSPGVS LGDLEKGAEEAFFELLGPDYGAGTEAGVLLAAEPLDVLTLGA  
AVLRGPPELEPGLFEPSPVMGGSLLYPEPWSAPGGPTTKKSPLAAPRGGLTLNEPLRPLYPAAADS PGDDGPG  
LASFTPFSDCALPPPPPPVQVSYDYSAGYSRTAYASLWRPDIWEGAPGEEGAHRD PLRARNLPPSFFTEP

rs:XP\_028275188 [XP\_028275188] transcriptional coactivator YAP1 [Parambassis ranga]. 45..59

MDPSQHNPPAGHQIVHVRGDSETDLEALFNAVMPKGSIMPPSVPMRMRKLPDSFFKPPPEPKSHSRQAS  
TDAGSGGVLTPHHVAHSSPASLQLGAVSGGSMGLAPAGASPQHLRQSSYEIPDDVPLPPGWEMAKTSSGQRYF  
LNHIEQTTTWQDPRKALLMNQPPSSVVPVQQNLMNPASGPLPDGWEQAITSEGEIYYINHKNKTTSWLDRLE  
PRYALNQRGITQSAPVKPLPPGPHSGVMGGNSQMRLQOIEKERLRLKQOELLRQRPELALRNQLPTSMDQDGST  
NPVSSPMGQDARTMTANSSDPFLNSGTYHSRDESTDSGLSMSSYSVPRTPDDFLNSVDEMDTGDPLPTSMATQPS  
RFPDYLDIAPGTDVLDLGTLEGESMAVEGEELMPSLQEQALSSDILNDMESVLAATKIDKESFLTWL  
PMRMRKLPDSFFKPP

rs:XP\_028370340 [XP\_028370340] transcriptional coactivator YAP1 isoform X8 [Phyllostomus discolor]. 85..99

MDPGQQPPPPQAPQGGQPPAQPPQGGPPSPGPGQPTPPGSQAAPQAPPAGHQIVHVRGDSETDLEALF  
NAVMPKNTANVPQTVPMRLRKLKLPDSFFKPPPEPKSHSRQASTDAGSAGALTPQHVAHSSPASLQLGAVSPGTLTP  
TGVVSGPAATPTAQHLRQSSFEIPDDVPLPAGWEMAKTSSGQRYFLNHIDQTTTWQDPRKAMLSQLNVTAPTSP  
VQQNMNSASAMNQRIQSAPVKQPPPLAPQSPQGGVLLGGNSNQOQMRLOQLQMEKERLRLKQOELLRQELAL  
RSQLPTLEQDGGTQNPVSSPGMSQELRTMTTNSDDPFLNSGTYHSRDESTDSGLSMSSYSVPRTPDDFLNSVDEM  
DTGDTINQSTLPSQQNRFPDYLEAIPGTNVDLGTLEGDMNIEGEEELMPSLQEQALSSDILNDMESVLAATKLDKE  
SFLTWL PMRLRKLKLPDSFFKPP

rs:XP\_028277481 [XP\_028277481] transcriptional coactivator YAP1-like isoform X1 [Parambassis ranga]. 42..56

MDAPPAGQQIVHVRGDSQTELEALFSAVMNPSKAARQPQSLPMRMRKLPDSFFRQPDPRGHSRQASSDG  
GPCGSLTPHHVAHSSPASLPVNSLSTQAADVAATPIIPDDVPLPHGWEMAKTPTGQRYFLNHLEKTTTWHDPR  
SQLQSAQAHPITGTPVHAHSLSNPAPTTPQPNINPETGPLPEGWEQAVTADGEVYIDHINKTTAWVDPRLAQK  
MNPGNLGLAMLQRQEKERLRCKQGLPQLTPQDAGGRNQIPSGMDHRSRQTHVPSLDVIRGSNHEPTLNGAHSR  
NESTDSGLSVSSLPRTSDHMLSSVDHMDTGDSGDAPSMTLQESMPVLPMSSEGEELMPCIEGLSSDLLMDMETVL  
SGSHMDRDSLTLW PMRMRKLPDSFFRQP

rs:XP\_028145773 [XP\_028145773] transcriptional coactivator YAP1-like [Diabrotica virgifera virgifera]. 36..50

MALNKSEVVTVDPKDLQALFDSVLKPKDSKRNVQVPWHKRRLPDSFFNPPPTGSKSINHRSRDSVSDSSC  
GSNTSTTSVSSACTIPIHQRHSSPASFQETMEQOPLQHMKQKSHDVSKKSKVKNRPLSGWEQGRTRDGKIYYI  
NHNTRTTTWDHPTNSLAAQTASKKHSAEQLLSTRQLSSNPFYNTVVQNRNLEHLPDGWEQARTSEGEIYFMNH  
KTRTTSWEDPRISSRQSTSDGKYALPELSRALLKQKHQNVLRQHEDSISSLDPRIITPTHFQQPSSEENGNEFSS  
QLPSAQQLRLQELYLERERLRQRHEYIREQENMMTALVHSFLPDITDRPEKEDIRGAVPPVSEALQPIMDVSREC  
QNMDSFDIPMLEDDVSSTDDLEPTFRPNEEVSMNTNVDAKSYLWL PWHKRRLPDSFFNPP

rs:XP\_016416304 [XP\_016416304] PREDICTED: transcriptional coactivator  
YAP1 isoform X1 [Sinocyclocheilus rhinoceros].45..59  
MDPSQHNPAGHQIVHVRGDSETDLEALFNAVMPKNTITPPSVPMRMRKLPDSFFKPPPEPKSHSRQAS  
TDAGTAGTLTPQHVRHSSPASLQLGAVSPGTLSSMVPANAPPQHRLRQSSYEIPDDVPLPPGWEMAKTPSGQRYF  
LNHNDQTTTWQDPRKALLQMNQAAPASPVVQQQNIMNPASGPLPDGWEQAITSEGEIYYINHKNKTTSWLDPRL  
DPYAMNQQRISHSAPVKQGSQLPSSPQSGVLGGNNQIRLQQIQMEKERLRIKQELLRQRPOELALRNQLPTSME  
QDGGTQNPVSSPSMGQDARNMTTNSDDPFLNSGTYHSRDESTDSGLSMSSYSVPRTPDFFLNSVDEMETGDSLGP  
SSMATQPSRFPDYLDALPGTDVLDLGTLEGESMAVEGEELMPSLQEQALSSDILNDMESVLAATKIDKENFLTWL  
PMRMRKLPDSFFKPP

rs:XP\_016416306 [XP\_016416306] PREDICTED: transcriptional coactivator  
YAP1 isoform X2 [Sinocyclocheilus rhinoceros].45..59  
MDPSQHNPAGHQIVHVRGDSETDLEALFNAVMPKNTITPPSVPMRMRKLPDSFFKPPPEPKSHSRQAS  
TDAGTAGTLTPQHVRHSSPASLQLGAVSPGTLSSMVPANAPPQHRLRQSSYEIPDDVPLPPGWEMAKTPSGQRYF  
LNHNDQTTTWQDPRKALLQMNQAAPASPVVQQQNIMNPASAMNQQRISHSAPVKQGSQLPSSPQSGVLGGNNQI  
RLQQIQMEKERLRIKQELLRQRPOELALRNQLPTSMEQDGGTQNPVSSPSMGQDARNMTTNSDDPFLNSGTYHSR  
DESTDSGLSMSSYSVPRTPDFFLNSVDEMETGDSLGPSSMATQPSRFPDYLDALPGTDVLDLGTLEGESMAVEGEE  
LMPSLQEQALSSDILNDMESVLAATKIDKENFLTWL PMRMRKLPDSFFKPP

rs:XP\_016420209 [XP\_016420209] PREDICTED: protein **FAM181A**  
[Sinocyclocheilus rhinoceros]. 111..125  
MASSDSEVKTLNLFVNLAASDIKAAALDRSAPCRRSVDHRKYLQKQLKRFSHRYAKMPRCHSHRNGDSAP  
AKLSEDAQPPGTGTGSGREERLNAEDGARSGQGQGGQAPMPMRKRQLPASFWKEPQSSSGSRERLERFLQSGHV  
RPPAVNGERSTTVFEDLNANPLLSGRAACACSCCSLPYRFLPHADAPLSSRAHVVIKPIPTKPSSSSSSSSSSSSV  
FSVFGFI PMRKRQLPASFWKEP

rs:XP\_016431451 [XP\_016431451] PREDICTED: transcriptional coactivator  
YAP1-like isoform X1 [Sinocyclocheilus rhinoceros]. 45..59  
MDPSQHNPAGHQIVHVRGDSETDLEALFNAVMPKNAISPPSVPMRMRKLPDSFFKPPPEPKSHSRQAS  
TDAGTAGTLTPQHIRAHSSPASLQLGAVSPGTLSSMVPANPQPQHRLRQSSYEIPDDVPLPPGWEMAKTPSGQRYF  
LNHNDQTTTWQDPRKALLQMNQAAPASPVVQQQNIMNPASGVPDGEQAITSEGEIYYINHKNKTTSWLDPRL  
DPYAMNQQRISQAPVKQGSQLPSSPQSGVLGGNNQIRLQQIQMEKERLRIKQELLRQRPOELALRNQLPTSME  
QDGGTQNPVSSPGMGQDARNMTTNSDDPFLNSGTYHSRDESTDSGLSMSSYSVPRTPDFFLNSVDEMETGDTLGP  
SSMATQPSRFPDYLDALPGTDVLDLGTLEGESMAVEGEELMPSLQEQALSSDILNDMESVLAATKIDKENFLTWL  
PMRMRKLPDSFFKPP

rs:XP\_016431452 [XP\_016431452] PREDICTED: transcriptional coactivator  
YAP1-like isoform X2 [Sinocyclocheilus rhinoceros]. 45..59  
MDPSQHNPAGHQIVHVRGDSETDLEALFNAVMPKNAISPPSVPMRMRKLPDSFFKPPPEPKSHSRQAS  
TDAGTAGTLTPQHIRAHSSPASLQLGAVSPGTLSSMVPANPQPQHRLRQSSYEIPDDVPLPPGWEMAKTPSGQRYF  
LNHNDQTTTWQDPRKALLQMNQAAPASPVVQQQNIMNPASAMNQQRISQAPVKQGSQLPSSPQSGVLGGNNQI  
RLQQIQMEKERLRIKQELLRQRPOELALRNQLPTSMEQDGGTQNPVSSPGMGQDARNMTTNSDDPFLNSGTYHSR  
DESTDSGLSMSSYSVPRTPDFFLNSVDEMETGDTLGPSSMATQPSRFPDYLDALPGTDVLDLGTLEGESMAVEGEE  
LMPSLQEQALSSDILNDMESVLAATKIDKENFLTWL PMRMRKLPDSFFKPP

rs:XP\_008216287 [XP\_008216287] PREDICTED: transcriptional coactivator  
yorkie isoform X1 [Nasonia vitripennis].>tr:K7J1R3\_NASVI [K7J1R3] SubName:  
Full=Uncharacterized protein {ECO:0000313|EnsemblMetazoa:NV15294-PA};  
52..66  
MALNQDVAEPGSGAAGAKSNLVVRIDQNSESDLQALFDSVLKPDSCRPLQVPLMRNLPDSFFNPPSTG  
SKSPSISHSRENSADSAFGAGGGGLVNGGGAATPGGNGSGGTTSPGAQPSGAAQVPOGLTVAHPRAHSSPASLQQ  
TYASAQQQSQHAPQHNSARHHHQKQRSYDVIISTVDDLGLPHGWEQARTPEGQIYFLNHLTRTTTWEDPRKTA  
AASVAVAVAAVESGKAAATPGQAGSNALGPLPDGWEQARTPEGEIYFINHQARTTSWFDPRIPSHLQRAPTS  
GAMLPQNWQIQQQGAAGIQSSQTLQACQKLRQLQSLQMERERLKRQOEIIRQVSSQELMLRQSTDAAMD  
PFLSGIN EQHARQESADSLGLGSAYSHPHTPEDFLANIDNMDGTSEGAPMETPDLSSLSDNIDSTDDLVPL  
QLGEEFSSD ILEDVQSLIDPVGNPTKPENILTWL PLMRNLPDSFFNPP

rs:XP\_008216288 [XP\_008216288] PREDICTED: transcriptional coactivator  
yorkie isoform X2 [Nasonia vitripennis]. 52..66

MALNQDVAEPGSGAAGAKSNLVVRIDQNSESDLQALFDSVLKPD SKRPLQVPLRMRNLPDSFFNPPSTG  
SKSPSISHSRENSADSAFGAGGGGLVNGGGAATPGGNGSGGTTSPGAQPSGAAQVPQGLTVAHPRAHSSPASLQQ  
TYASAQQQSQHAPQHNSARHHHHQKQRSYDVI STVDDLGLPLHGWEQARTPEGQIYFLNHLTRTTTWEDPRKTA  
AASVAAVAAAVESGKAAATPGQAGSNALGPLPDGWEQARTPEGEIYFINHQARTTSWFDPRI PSHLQRAPTSGAM  
LPQNWQIQQQGAAGIQSSQTLQACQQLRQLQSLQMERERLQKQOQEI IRQVSSQELMLRQSTTDAAMDFFLSGIN  
EQHARQESADSLGLGSAYS LPHTPEDFLANIDDNMDGTSGAPMETPDLSSLSDNIDSTDDLVLPLQLGEEFSSDI  
LEDVQSLIDPVG NPTK PENILT WL PLRMRNLPDSFFNPP

rs:XP\_001604094 [XP\_001604094] PREDICTED: transcriptional coactivator  
yorkie isoform X3 [Nasonia vitripennis]. 52..66

MALNQDVAEPGSGAAGAKSNLVVRIDQNSESDLQALFDSVLKPD SKRPLQVPLRMRNLPDSFFNPPSTG  
SKSPSISHSRENSADSAFGAGGGGLVNGGGAATPGGNGSGGTTSPGAQPSGAAQVPQGLTVAHPRAHSSPASLQQ  
TYASAQQQSQHAPQHNSARHHHHQKQRSYDVI STVDDLGLPLHGWEQARTPEGQIYFLNHLTRTTTWEDPRKTA  
AASVAAVAAAVESGKAAATPGQAGSNALGPLPDGWEQARTPEGEIYFINHQARTTSWFDPRI PSHLQRAPTSGAM  
LPQNWQIQQQGAAGIQSSQTLQACQQLRQLQSLQMERERLQKQOQEI IRQVSSQELMLRQSTTDAAMDFFLSGINEQH  
ARQESADSLGLGSAYS LPHTPEDFLANIDDNMDGTSE GAPMETPDLSSLSDNIDSTDDLVLPLQLGEEFSSDILE  
DVQSLIDPVG NPTK PENILT WL PLRMRNLPDSFFNPP

rs:XP\_016135139 [XP\_016135139] PREDICTED: uncharacterized protein  
LOC107590746 [Sinocyclocheilus grahami]. 232..246

MAASVIRTL SNLGLAKPFPFCFFPVEDEEETEEEEEYEEELREDSLEEEEDAVASESQEEEPWSFDSSPNN  
AEMTNQLLRMAASVIRTL SNLGLAKPFPFCFFPVEDEEETEEEEEYEEELREDSLEEEEDAVASESQEEEPWSFDSS  
PNNAEMTNQLLRFAELISSDVQRYFGRSQDPDACDIYAEKPCPKVGGRRQRYADFIKVASSGQGEPEPSLGPLAE  
LFQDAQRKGRGLPMSQRRLPVSFWTEPFQAQLDMLGDTSMQDNSLSMSNTSESSININTSLSMFSNSSVCTMTSS  
SISGTLSSSSTPDFS DLLAHWAMDRENPNFNCDYPLS PMSQRRLPVSFWTEP

rs:XP\_016138714 [XP\_016138714] PREDICTED: protein **FAM181B**  
[Sinocyclocheilus grahami]. 157..171

MAVQAAIMNSQFLNFCFPGSVMDYEVEKGLEGLLGEVDCGGDFKETTDRDLSFIDSASSNIKLALDK  
PVKSKRKNVHRKYLQKQIKRCTGII SPGTPVQEPCKRQGSQPPTSNLSGKTTPPKKDGMAQLQSKSLAALFNS  
AKDVRGERAKKPLRHRNLPPSFFTEPANSSRVTSTSGMSLKD LERGTPEAAEFFELLGPDYSNMVSEQDLFHTA  
PIRIQQEVTVGPEPYDSHHFVSGGFLYTEPWGTCSGTSKKS GDMRTVPVQPNLYTHTDLSGSVPVEQSSPCALTF  
SNFFTDCSAPPVSYDLVNGYNRGNFSSL PLRHRNLPPSFFTEP

rs:XP\_018619362 [XP\_018619362] PREDICTED: protein **FAM181B** [Scleropages  
formosus].>tr:A0A1W5AUZ7\_9TELE [A0A1W5AUZ7] SubName: Full=protein **FAM181B**  
{ECO:0000313|RefSeq:XP\_018619362.1}; 230..244

MDHTLKG RDYTPSHCKQLSKGFEGEERGRGALPSPSKRSPSVQLGGVQKPCQWQDQGF AHLPP EQEDA  
ACFCEAPPPGTAVDAVGE GAGCDAVMAVQAALMTPQSLLGEGACEGDFREATRDLLSFIDSASSNIKLALDKPVK  
SRRKVNHRKYLQKQIKRCAGIAGTLGAAQDSGKRPGSSPPTHPGGCVPARPPSKRDGLQANLQSRSLAALFEPMR  
DARXXXXXXXXPLRQRNLPPSFFTEPAH CARVTSTSGVTLKDLERGNPEAADFLELLGPDYSGMLMEQDVGR TAPA  
SNTRNQLVVRHPCGLFEVCNLI VTDKILSMSGGVDLEGIRLLDRERTL KELTGPLRQRNLPPSFFTEP

rs:XP\_018620303 [XP\_018620303] PREDICTED: transcriptional coactivator  
YAP1 isoform X1 [Scleropages formosus].>tr:A0A1W5B304\_9TELE [A0A1W5B304]  
SubName: Full=transcriptional coactivator YAP1 isoform X1  
{ECO:0000313|RefSeq:XP\_018620303.1}; 45..59

MDPSQHNPAGHQIVHVRGDSETDLEALFNAMNPKNAIVPHSVPMRMRKLPDSFFKPPPEPKSHSRQAS  
TDAGTAGSLTPQH VRAHSSPASLQLGAVSPASMASMTPPGGPPQH LRQSSYEIPDDVPLPPGWEMAKTSSGQRYF  
LNHLEQSTTWQDPRKTMLQMN TSPNSSVSVQOGIMGTASGPLPEGWEQAVTTDGEIYYINHKNKTT SWLDPRLDP  
RYALNQQRIGQSATVKQAPALPSSPQGGVMGGGSQLRLQQLQMEKERVRLKQOELLRQRQPQELPLRTQVPTSME  
QDGSTQNNISSPGVAQDVRTMTSNSSDPFLNSGTYHSRDESTDSGLSMSSYSVPRTPPDFLNSVDEMDTGDPLGP  
ASMATQPSRFPDYLDTI PGTNVDLGTLESDSMAVEGEELMPSLQEQALSSEILNDMESVLAATKIDKESFLT WL  
PMRMRKLPDSFFKPP

rs:XP\_018620312 [XP\_018620312] PREDICTED: transcriptional coactivator  
YAP1 isoform X2 [Scleropages formosus].>tr:A0A1W5AY12\_9TELE [A0A1W5AY12]  
SubName: Full=transcriptional coactivator YAP1 isoform X2  
{ECO:0000313|RefSeq:XP\_018620312.1}; 45..59

MDPSQHNPAGHQIVHVRGDSETDLEALFNAVMPKNAIVPHSVPMRMRKLPDSFFKPPPEPKSHSRQAS  
TDAGTAGSLTPQHVRHSSPASLQLGAVSPASMASMTPPGGPPQHRLRQSSYEIPDDVPLPPGWEMAKTSSGQRYF  
LNHLEQSTTWQDPRKTMQMNTSPNSSVSVQOGIMGTASGPLEGWEQAVTTDGEIYYINHKNKTTSWLDFRLDP  
RYALNQQRIGQSATVKQAPALPSSPQGGVMGGGGSQRLRQQLOMEKERVRLKQQELLRQRQVPTSMEQDGSTQN  
NISSPGVAQDVRTMTSNSSDPFLNSGTYHSRDESTDSGLSMSSYSVPRTPDDFLNSVDEMDTGDPLGPASMATQP  
SRFPDYLDTIPTGNVDLGTLESDSMAVEGEELMPSLQEALSSEILNDMESVLAATKIDKESFLTWL  
PMRMRKLPDSFFKPP

rs:XP\_005957321 [XP\_005957321] PREDICTED: protein **FAM181A** [Pantholops  
hodgsonii]. 130..144

MASDSVDMKLLNFVNLASSDIKAALDKSAPCRRSVDHRKYLQKQLKRFSQKYSRLPRGLPGRGAEPHLK  
RGPEDRPRPLPLESGHGSSPSGGGGYKEKALGNPDREESLSKERTLHGPDPGAARPGQVPMRKRQLPASFWEEP  
RPTHSPVGLGGLGREGPPYEGKKHCKGLEPLGPETAPVPTSPRAPAEKEPLKMPGVSIVGRVSAWCCPFQY  
HGQPIYPSPPGALPQSPMPSLGLWRKSAASPGELAHFCKDAEGPGQKVYRPPVVLKPIPTKPAVPPPIFNVFGYL  
PMRKRQLPASFWEEP

rs:XP\_006621320 [XP\_006621320] PREDICTED: yorkie homolog [Apis dorsata].  
46..60

MALNQDVDQLSKSNLVVRIDQNSESDLQALFDSVLKPDSCRPLQVPLMRNLPSFFNPPSTGSKSPSI  
SHSRENSADSAFGTAAAAAAGVGGGGPTPGGNATGTPATGAAGAATGGSGNSAGSGSNAAGAAAAGLTVAH  
HSSPASLQOQTYASAQQAQAPQHAPQPHARHHHHQKQRSYDVI STVDDLGLPLPHGWEQARTPEGQIYFLNHLTRTTW  
EDPRKTAANVAAVAAAVDNGNSLGLPLPDGWEQARTPEGEIYFINHQTRTTSWFDPRIPHTLQRAPTSGAMLPQ  
NWLQOQOQPTGGGIQNNQTLQACQKLRQLQSLQMERERLQKQOQEIIRQOELMLRQSTTDAAMDFFLSGINEQ  
HARQESADSGGLGSAISLPHPTPEDFLANIDNMDGTSDDGAPMETPDLSTLSDNIDSTDDLVPVSLQ  
LSEDFSSDILDVQSLINPNTTKPENVTWL PLRMRNLPSFFNPP

rs:XP\_017767514 [XP\_017767514] PREDICTED: transcriptional coactivator  
yorkie [Eufriesea mexicana]. 46..60

MALNQDVDQLSKSNLVVRIDQNSESDLQALFDSVLKPDSCRPLQVPLMRNLPSFFNPPSTGSKSPSI  
SHSRENSADSAFGTAAAAAAGVGGGGPAPGGNATGTPATGAAGAATGGSGNSAGSGSNAAGAAAAA  
VAAAAAGLTVAH  
PRAHSSPASLQOQTYASAQQAQAPQHAPQPHARHHHHQKQRSYDVI STVDDLGLPLPHGWEQARTPEGQIYFLN  
HLTRTTT  
WEDPRKTAANVAAVAAAVDNGKSTTGATNTLGLPLPDGWEQARTPEGEIYFINHQTRTTSWFDPRIP  
HTLQRAPTSGAMLPQ  
NWLQOQOQPTGGGIQSNQTLQACQKLRQLQSLQMERERLQKQOQEIIRQOELMLRQSTTDA  
AMDFFLSGINEQ  
HARQESADSGGLGSAISLPHPTPEDFLANIDNMDGTSDDGAPMETPDLSTLSDNIDSTDDLVP  
VSLQ  
LSEDFSSDILDDVQSLINPNTTKPENVTWL PLRMRNLPSFFNPP

rs:XP\_017779527 [XP\_017779527] PREDICTED: transcriptional coactivator  
YAP1-A-like isoform X1 [Nicrophorus vespilloides]. 41..55

MALNQDESKQVVRVDQDSETGLQALFDSVLKPDSCRPLQVPWKLRLKLPDSFFNPPSTGTKSINHSRENS  
VDSAFGSSSSGGGGGGGGSSNGGGTSTTPVNTVPLQTTTHHRAHSSPASLQOQTYAVGQQOQTTPTHHMKQRSYDV  
ASKTEDNTPLPPGWEQARTPEGQVYYLNHTTRTTTWEDPRKTTLASQVAAQHQSAEQLLTTHQVVTSPQTS  
PS  
TTCTGAKTSSDVLGLPEGWEQSQTSDGELYFINHQTRTTSWFDPRIPHTLQSPGSTLILPQTWHSTGNPLSP  
QSSSAKSQOQMLHLLQLERDKLQKMRQOQEIIRQOEMRRLMVRSSSDLPNMDPFPNLSDSRQESADSGLMGTT  
YSVPHTPEDFLNMDNMEVGSHTMDTPDMSLTDNIDPTDDLVPVTLQCEEFPMLSDVQNIIDPPTTKPDNVL  
VWL PWKLRLKLPDSFFNPP

rs:XP\_017779528 [XP\_017779528] PREDICTED: WW domain-containing  
transcription regulator protein 1-like isoform X2 [Nicrophorus  
vespilloides]. 41..55

MALNQDESKQVVRVDQDSETGLQALFDSVLKPDSCRPLQVPWKLRLKLPDSFFNPPSTGTKSINHSRENS  
VDSAFGSSSSGGGGGGGGSSNGGGTSTTPVNTVPLQTTTHHRAHSSPASLQOQTYAVGQQOQTTPTHHMKQRSYDV  
ASKTEDNTPLPPGWEQARTPEGQVYYLNHTTRTTTWEDPRKTTLASQVAAQHQSAEQLLTTHQVVTSPQTS  
PS  
TTCTATHLQSPGSTLILPQTWHSTGNPLSPQSSSAKSQOQMLHLLQLERDKLQKMRQOQEIIRQOEMRRLMVRSS  
SDLPNMDPFPNLSDSRQESADSGLMGTTYSVPHTPEDFLNMDNMEVGSHTMDTPDMSLTDNIDPTDDL  
VPTLQCEEFPMLSDVQNIIDPPTTKPDNVLVWL PWKLRLKLPDSFFNPP

rs:XP\_007447169 [XP\_007447169] PREDICTED: yorkie homolog isoform X1  
[Lipotes vexillifer].>tr:A0A340WJ71\_LIPVE [A0A340WJ71] SubName: Full=yorkie  
homolog isoform X1 {ECO:0000313|RefSeq:XP\_007447169.1}; 86..100

MDPGQQQPPPQPAPQGGQPPAQPQQGQGPSSGPGQPAPPGSQAAPQAPPAGHQIVHVRGDSETDLEAL  
FNAVMNPKTANVPQTVPMRLRKLKLPDSFFKPPPEPKPHSRQASTDAGTAGALTPQHVRHSSPASLQLGAVSPGTLT  
PTGVVSGPAATPTAQHLRQSSFEIPDDVPLPAGWEMAKTSSGQRYFLNHIDQTTTWQDPRKAMLSQMNVTSP  
PVQQNMNSASGPLPDGWEQAMTQDGEIYYINHKNKTTSWLDPRLDPRFAMNQRISQSAPVKQPPPLAQSPQGG  
VMGGGNSNQQQMRLQQLQMEKERLRLKQOELLRQELALRSQLPTLEQDGGTQNPVSSPGMSQELRTMTTNSSDP  
FLNSGTYHSRDESTDSGLSMSSYSVPRTPDDFLNSVDEMDTGDTINQSTLPSQQNRFPDYLEAIPGTNVDLGTLE  
GDGMNIEGEEELMPSLQEQALSSDILNDMESVLAATKLDKESFLTWL PMRLRKLKLPDSFFKPP

rs:XP\_007447170 [XP\_007447170] PREDICTED: yorkie homolog isoform X2  
[Lipotes vexillifer].>tr:A0A340WJJ0\_LIPVE [A0A340WJJ0] SubName: Full=yorkie  
homolog isoform X2 {ECO:0000313|RefSeq:XP\_007447170.1}; 71..85

MDPGQQQPPPQPAPQGGQPPAQPQQGQGPSSGPGQPAPPGSQAAPQAPPAGHQIVHVRGDSETDLEALFNAVMNPKTANVPQTV  
VPMRLRKLKLPDSFFKPPPEPKPHSRQASTDAGTAGALTPQHVRHSSPASLQLGAVSPGTLTPTGVVSGPAATPTAQ  
HLRQSSFEIPDDVPLPAGWEMAKTSSGQRYFLNHIDQTTTWQDPRKAMLSQMNVTSP  
TSPPVQQNMNSASGPLPDGWEQAMTQDGEIYYINHKNKTTSWLDPRLDPRFAMNQRISQSAPVKQPPPLAQSPQGGVMGGGNSNQQQMRL  
QQLQMEKERLRLKQOELLRQELALRSQLPTLEQDGGTQNPVSSPGMSQELRTMTTNSSDPFLNSGTYHSRDESTDSGLSMSSYSVPRTPD  
DFLNSVDEMDTGDTINQSTLPSQQNRFPDYLEAIPGTNVDLGTLEGDGMNIEGEEELMPSLQEQALSSDILNDMESVLAATKLDKESFLTWL  
PMRLRKLKLPDSFFKPP

rs:XP\_007447171 [XP\_007447171] PREDICTED: yorkie homolog isoform X3  
[Lipotes vexillifer].>tr:A0A340WEW9\_LIPVE [A0A340WEW9] SubName: Full=yorkie  
homolog isoform X3 {ECO:0000313|RefSeq:XP\_007447171.1}; 86..100

MDPGQQQPPPQPAPQGGQPPAQPQQGQGPSSGPGQPAPPGSQAAPQAPPAGHQIVHVRGDSETDLEAL  
FNAVMNPKTANVPQTVPMRLRKLKLPDSFFKPPPEPKPHSRQASTDAGTAGALTPQHVRHSSPASLQLGAVSPGTLT  
PTGVVSGPAATPTAQHLRQSSFEIPDDVPLPAGWEMAKTSSGQRYFLNHIDQTTTWQDPRKAMLSQMNVTSP  
TSPPVQQNMNSASDPRLDPRFAMNQRISQSAPVKQPPPLAQSPQGGVMGGGNSNQQQMRLQQLQMEKERLRLKQO  
ELLRQELALRSQLPTLEQDGGTQNPVSSPGMSQELRTMTTNSSDPFLNSGTYHSRDESTDSGLSMSSYSVPRTPD  
DFLNSVDEMDTGDTINQSTLPSQQNRFPDYLEAIPGTNVDLGTLEGDGMNIEGEEELMPSLQEQALSSDILNDMESV  
LAATKLDKESFLTWL PMRLRKLKLPDSFFKPP

rs:XP\_007447424 [XP\_007447424] PREDICTED: protein **FAM181B** [Lipotes  
vexillifer].>tr:A0A340WJY8\_LIPVE [A0A340WJY8] SubName: Full=protein **FAM181B**  
{ECO:0000313|RefSeq:XP\_007447424.1}; 221..235

MAVQAALLSTHPFVFPFGFGGSPDGLGSAFGALDKGCCFEDEETGTPAGALLAGAEGGDVREATRDLLS  
IDSASSNIKLALDKPGKSKRKNVHRKYLQKQIKRCSGLMGAAPPSPGAADTPAKRPLAAASAQTVPAQAHGK  
AGPRREASQAAAAASLQSQSLAALFDSLHVPGAADPAGVAEAPAAAGLVGAGAGGVGGDAAGPAGGPAVPGARK  
VPLRARNLPPSFFTEPSRAGGGGCGSPGPGVSLGDLEKGAEEAFFELLGPDYAGSEAGVLLAAEPLDVLLTGA  
AVLRGPPELETGLFEPPEPAMGGSLLYPEPWSAPGGSTTKKSPLAAPRGGLTLNEPLRPLYPAAADSPPGDDGPG  
LASFTPFSDCTLPPPPPPPPPPPPQVSYDYSAGYSRTAYASLWRPDIWEGAPGEEGAHRD  
PLRARNLPPSFFTEP

rs:XP\_007447496 [XP\_007447496] PREDICTED: protein **FAM181A** isoform X1  
[Lipotes vexillifer].>tr:A0A340WFT7\_LIPVE [A0A340WFT7] SubName:  
Full=protein **FAM181A** isoform X1 {ECO:0000313|RefSeq:XP\_007447496.1};  
180..194

MKLLQMLIRGSPCCQPEISPPGQLCALPWSRQPPAEPSSWKAPCSGPLVMASDSVVKMLLNFNVLAS  
SDIKAALDKSAPCRRSVDHRKYLQKQLKRFSQKYSRLPRGLPGRGAEPHLKRGSEDRPGRPLDLSGHSSSPGGGG  
CCKEKALGNPYKEECLSKEQNLHGPDPAAARPGQVPMRKRQLPASFWEEPRTQSYVPGLEGGGLGPREGPPYEGK  
KHCKGLEPLGPETAPVPASPRAPTEKEPLKMPGVSLVGRVNAWSCCFFQYHGQPIYPGPPGALPQSPLPSLGLWR  
KSSASPGELNHFCKDVEGPGQKVYRPVVLKPIPTKPAMPPPIFNVFGYL PMRKRQLPASFWEEP

rs:XP\_007447497 [XP\_007447497] PREDICTED: protein **FAM181A** isoform X2  
[Lipotes vexillifer].>tr:A0A340WIX9\_LIPVE [A0A340WIX9] SubName:  
Full=protein **FAM181A** isoform X2 {ECO:0000313|RefSeq:XP\_007447497.1};  
129..143

MASDSVVKMLLNFNVLASSDIKAALDKSAPCRRSVDHRKYLQKQLKRFSQKYSRLPRGLPGRGAEPHLK  
RGSEDRPGRPLDLSGHSSSPGGGGCCKEKALGNPYKEECLSKEQNLHGPDPAAARPGQVPMRKRQLPASFWEEP  
RTQSYVPGLEGGGLGPREGPPYEGKKHCKGLEPLGPETAPVPASPRAPTEKEPLKMPGVSLVGRVNAWSCCFFQYH

GQPIYPGPPGALPQSPLPSLGLWRKSSASPGELNHFKDVEGPGQKVYRPVVLKPIPTKAMPPIFNVFGYL  
PMRKRQLPASFWEEP

rs:XP\_007985859 [XP\_007985859] PREDICTED: protein **FAM181A** isoform X1  
[Chlorocebus sabaeus]. 257..271

MLGAGVVGGGGYHQGGRGLGLAFKWSSCLSENKHLTGKLAAWCVGDGAGWECVPAPAMPPVAGSPWAS  
CLTFLSLGCKKRAPDPSRLGEALLAPAASQVSLVPFLGAAGHQSSPSSWKASCSPVLMASDSDVKMLLNFNVL  
ASSDIKAALDKSAPCRRSVDHRKYLQKQLKRFSQKYSRLPRGLPGRAAEPYLKRGESEDRPGRLLLDLGPDSSPGG  
GGGCKEKAPRNPYREECLAKEQLPQGQHPEAAQPGQVPMRKRQLPASFWEEPPTHSHYHVGLGGLGPREGPPYE  
GKKNKCKGLEPLGPEIVPVPMSPRALAEKEPLKMPGVSLVGRVNAWSCCPFYHGQPIYPGPLGALPQSPVPSLGL  
WKKSPAFFGELAHLCCKDADGLGQKVCRPVVLKPIPTKPAVPPPIFNVFGYL PMRKRQLPASFWEEP

rs:XP\_007985860 [XP\_007985860] PREDICTED: protein **FAM181A** isoform X2  
[Chlorocebus sabaeus].>rs:XP\_007985861 [XP\_007985861] PREDICTED: protein  
**FAM181A** isoform X2 [Chlorocebus sabaeus].>rs:XP\_007985862 [XP\_007985862]  
PREDICTED: protein **FAM181A** isoform X2 [Chlorocebus sabaeus]. 129..143

MASDSDVKMLLNFNVLASSDIKAALDKSAPCRRSVDHRKYLQKQLKRFSQKYSRLPRGLPGRAAEPYLK  
RGSEDRPGRLLLDLGPDSSPGGGGGCKEKAPRNPYREECLAKEQLPQGQHPEAAQPGQVPMRKRQLPASFWEEP  
PTHSHYHVGLGGLGPREGPPYEGKKNKCKGLEPLGPEIVPVPMSPRALAEKEPLKMPGVSLVGRVNAWSCCPFYH  
GQPIYPGPLGALPQSPVPSLGLWKKSPAFFGELAHLCCKDADGLGQKVCRPVVLKPIPTKPAVPPPIFNVFGYL  
PMRKRQLPASFWEEP

rs:XP\_017713486 [XP\_017713486] PREDICTED: protein **FAM181A** [Rhinopithecus  
bieti].>rs:XP\_017713487 [XP\_017713487] PREDICTED: protein **FAM181A**  
[Rhinopithecus bieti].>rs:XP\_010382821 [XP\_010382821] PREDICTED: protein  
**FAM181A** [Rhinopithecus roxellana]. 129..143

MASDSDVKMLLNFNVLASSDIKAALDKSAPCRRSVDHRKYLQKQLKRFSQKYSRLPRGLPGRAAEPYLK  
RGSEDRPGRLLLDLGPDSSPGGGGGCKEKALRNPYREECLAKEQLPQGQHPEAAQPGQVPMRKRQLPASFWEEP  
PTHSHYHVGLGGLGPREGPPYEGKKNKCKGLEPLGPEIVPVPMSPRALAEKEPLKMPGVSLVGRVNAWSCCPFYH  
GQPIYPGPLGALPQSPVPSLGLWKKSPAFFGELAHLCCKDADGLGQKVCRPVVLKPIPTKPAVPPPIFNVFGYL  
PMRKRQLPASFWEEP

rs:XP\_017730717 [XP\_017730717] PREDICTED: protein **FAM181B** [Rhinopithecus  
bieti].>tr:A0A2K6JYF4\_RHIBE [A0A2K6JYF4] SubName: Full=Family with sequence  
similarity 181 member B {ECO:0000313|Ensembl:ENSRBIP00000004049};  
221..235

MAVQAALLSTHPFVFPFGGGSPDGLGGAFGALDKGCCFEDDETGAPAGALLSGAEGGDLREATRDLLSF  
IDSASSNIKLALDKPGKSKRKNVHRKYLQKQIKRCSGLMGAVPPGPPSPAADTPAKRPLAAPSAPTVAAPAHGK  
AVPRREAAQAAAAASLQSRSLAALFDSLHRVPGGAEPAGGAVVAVVAGLGGAGTGGAGGDAVGPAGATAVPGARK  
VPLRARNLPPSFFTEPSRAGGGGCGSPGPDVSLGDLEKGAEEFFELLGPDYAGTEAAVLLAAEPLDVFPAGA  
SVLRGPPELESGLFDPAPAVVGNLLYPEPWSVPGCPPTKPKPLTAPRGGLTLNEPLRPLYPAAADSPPGGEDGPGH  
LASFSPPFFPCALPPPPPPHQVSYDYSAGYSRNAYSSLWRPDGVWEGAPGEEGAHRD PLRARNLPPSFFTEP

rs:XP\_008490751 [XP\_008490751] PREDICTED: protein **FAM181A** [Calypte  
anna].>tr:A0A091HHE0\_CALAN [A0A091HHE0] SubName: Full=Protein **FAM181A**  
{ECO:0000313|EMBL:KFO95708.1}; 127..141

MASDSEVKTLNFNVLASSDIKAALDKSAPCRRSVDHRKYLQKQLKRFSQKYSRIPRCHPSKPPECGWH  
RGAEDRGRGPQPEAPDPSPHGGAAAERGLQTAEVEESLTGEGVLQDQONLEASRPDQVPMRKRQLPASFWEEP  
QSLPARAFSTGPEGLPASRDPPPYEGKSKRSLDAASPENPSESALHAGEKDTARVLTGRVGAWTCCPFP  
VYQPPGTLPPSPFALGLWRKSTVAALPAEVPHFCKEADGTGQKLYRPVVLKPIPTKPTIPPIFNVFSYL  
PMRKRQLPASFWEEP

rs:XP\_008281832 [XP\_008281832] PREDICTED: protein **FAM181A** [Stegastes  
partitus]. 104..118

MANADSEVKTLNFNVLASSDIKAALDKSAPCRRSVDHRKYLQKQLKRFSQKYSRVPRCHTHRSAEYRC  
AKPAGTVNQSVTVSEKANSDAQDVENVGSAVEQVPMRKRQLPASFWEEP  
NEKRKRSYDEDAKAAMSASNRRSSADKETLKLDLTSHHCVSVCGCCPFYHGHHQVLHSHIVVPHPLGLWSKAA  
GTETERPEHPYQKIHVHVVKPIPTKPTAQSPIFSVMGFI PMRKRQLPASFWEEP



rs:XP\_008276992 [XP\_008276992] PREDICTED: yorkie homolog isoform X1  
[Stegastes partitus].>tr:A0A3B4ZTA6\_9TELE [A0A3B4ZTA6] SubName:  
Full=Uncharacterized protein {ECO:0000313|Ensembl:ENSSPAP00000011011};  
46..60

MDAHRGAPPAGQQVVHVRGDSQTELEALFSAVMNPSKAVRQPSSVPMRMRKLPDSFFRQPDPRGHSRQA  
SSDGGVCGSLTPHHVRAHSSPASLPVNSLSTQAADVATTPPIIPDDVPLPHGWEMAKTPTGQRYFLNHRDKTTTWH  
DPRLSQLQSAAAQHPISGTPVHAHSLSNPAPTTQPQNINPETGPLPEGWEQAVTADGEVYYIDHINKTTTWVDPR  
LAQKMNPGLGLAMQQRQEKERLRCKQGLPFPQIGSQEAGGRSQMPGGMDHRSQAQTLVPPLDVIRAPNHEPTLN  
GAHSRNESTDSGLSVSSLPRTSDHMLSSVDHMDTGEPVEPPSMTLQESMPVLPMSGEELMPCPEGLSSDLLMD  
METVLSGSHMDRDSLLTWL PMRMRKLPDSFFRQP

rs:XP\_008276993 [XP\_008276993] PREDICTED: yorkie homolog isoform X2  
[Stegastes partitus]. 46..60

MDAHRGAPPAGQQVVHVRGDSQTELEALFSAVMNPSKAVRQPSSVPMRMRKLPDSFFRQPDPRGHSRQA  
SSDGGVCGSLTPHHVRAHSSPASLPVNSLSTQAADVATTPPIIPDDVPLPHGWEMAKTPTGQRYFLNHRDKTTTWH  
DPRLSQLQSAAAQHPISGTPVHAHSLSNPAPTTQPQNINPETAQKMNPGLGLAMQQRQEKERLRCKQGLPFPQIG  
SQEAGGRSQMPGGMDHRSQAQTLVPPLDVIRAPNHEPTLNGAHSRNESTDSGLSVSSLPRTSDHMLSSVDHMDT  
GEPVEPPSMTLQESMPVLPMSGEELMPCPEGLSSDLLMDMETVLSGSHMDRDSLLTWL  
PMRMRKLPDSFFRQP

rs:XP\_008287715 [XP\_008287715] PREDICTED: yorkie homolog [Stegastes  
partitus].>tr:A0A3B4ZWH1\_9TELE [A0A3B4ZWH1] SubName: Full=Yes associated  
protein 1 {ECO:0000313|Ensembl:ENSSPAP00000013238}; 45..59

MDPSQHNPPAGHQIVHVRGDSQTELEALFNAVMPKNTIVPPSVPMRMRKLPDSFFKPPPEPKSHSRQAS  
TDAGSAGVLTTPHHVRAHSSPASLQLGAVSGGSLSGMASAGASPOHLRQSSYEIPDDAPLPAGWEMAKTASGQRYF  
LNHIDQTTTWQDPRKALLQMNQAAPPSSVFPVPPQNLMPASGPLPDGWEQAITSEGEIYYINHKNKTTSWLDPR  
EPYALNQQRITQSAPVKQGGPLPSTHSGVMGGNNQLRLQOIEKERLRKQQLRQPELALRNQLPTSMDQ  
DGSTNPVSSPMAQDARTMTANSSDPFLNSGTYHSRDESTDSGLSMSSYSVPRTPDDFLNSVDEMDTGDPLPPSMA  
TQPSRFPDYLDIAPGTVDVLTGTLEGESMAVEGEELMPSLQEQALSSDILNDMESVLAATKIDKESFLTWL  
PMRMRKLPDSFFKPP

rs:XP\_008288570 [XP\_008288570] PREDICTED: protein **FAM181B** [Stegastes  
partitus].>tr:A0A3B5AW19\_9TELE [A0A3B5AW19] SubName: Full=Family with  
sequence similarity 181 member B {ECO:0000313|Ensembl:ENSSPAP00000017707};  
155..169

MAVQAAIMNPQFMNFCFPGSVMEYDVEKSLDGSLLGEAENDEYKETTDRDLSFIDSASSNIKLALDKP  
VKSKRKNVHRKYLQKQIKRGTGIIITPGNVAEAPVKRQGSPLTQPSPLQSKTLPKRQDGVQANLQSKSLAALFSPVK  
DIRGEKAKKPLRHRNLPPSFFTEPANCSKVSSTSGMTLKDLEKRNPEAAEFFELLGPDYSNMVSEQDLYQGMPF  
RVQPELQSPDPASYDAHHLVGGLLYSEPWTSCSGPSKGLGETLRGTGPAQPPAYCHSEAASGPIEDNALCTLAFPN  
FFTDCSIPQVTYDLSSGGYNRANYSSL PLRHRNLPPSFFTEP

rs:XP\_008696489 [XP\_008696489] PREDICTED: protein **FAM181A** isoform X1  
[Ursus maritimus].>rs:XP\_026371172 [XP\_026371172] protein **FAM181A** isoform  
X1 [Ursus arctos horribilis].>tr:A0A384CPS9\_URSMA [A0A384CPS9] SubName:  
Full=protein **FAM181A** isoform X1 {ECO:0000313|RefSeq:XP\_008696489.1};  
187..201

MERGAGRTAGSGDVCTPTPNPGLLPHLCVSSVFPFGAASDPQSPRSSWKAPCSGPLVMASDSDVKMLL  
NFVNLAASSDIKAALDKSAPCRRSVDHRKYLQKQLKRFSQKYSRLPRGLPGRGAEPHLRRGADDRPGRPLPLESGHD  
SSPGGGGGCKEKALGNPYREECLSQEQTQQRONPEAARPGQVPMRKRQLPASFWEEPRTHTSYPLGLEGGGLPRE  
GPPYEGKRCKGLEPLDTEMAPVPASPRAPAEKEPLKMSGVSLVGRVNAWSCCPFYHQGPVYAGPPGALPQSSV  
PGLGLWRKSPASPGELAHFCKDVGDPQKVYRPVVLKPIPTKPAVPPPIFNVFGYL PMRKRQLPASFWEEP

rs:XP\_008696497 [XP\_008696497] PREDICTED: protein **FAM181A** isoform X2  
[Ursus maritimus].>rs:XP\_008696505 [XP\_008696505] PREDICTED: protein  
**FAM181A** isoform X2 [Ursus maritimus].>rs:XP\_008696507 [XP\_008696507]  
PREDICTED: protein **FAM181A** isoform X2 [Ursus maritimus]. 129..143

MASDSDVKMLLNFNLAASSDIKAALDKSAPCRRSVDHRKYLQKQLKRFSQKYSRLPRGLPGRGAEPHLR  
RGADDRPGRPLPLESGHDSSPGGGGGCKEKALGNPYREECLSQEQTQQRONPEAARPGQVPMRKRQLPASFWEEP  
RTHTSYPLGLEGGGLPREGPPYEGKRCKGLEPLDTEMAPVPASPRAPAEKEPLKMSGVSLVGRVNAWSCCPFYH

GQPVYAGPPGALPQSSVPLGGLWRKSPASPGELAHFCKDVGPGQKVYRPVVLKPIPTKPAVPPPIFNVFGYL  
PMRKRQLPASFWEEP

rs:NP\_001102620 [NP\_001102620] protein **FAM181B** [Rattus norvegicus].>tr:B0BN67\_RAT [B0BN67] SubName: Full=Family with sequence similarity 181, member B {ECO:0000313|Ensembl:ENSRNOP00000014284}; SubName: Full=Similar to A830059I20Rik protein {ECO:0000313|EMBL:AAI58704.1}; SubName: Full=Similar to A830059I20Rik protein (Predicted) {ECO:0000313|EMBL:EDM18510.1};>gp:BC158703\_1 [BC158703] similar to A830059I20Rik protein [Rattus norvegicus] 218..232

MAVQAALLSSHPIPFQFGGSADGLVSAFGLDKGCCFEDDESAVSAGALLSGSDGGDVREATRDLISF  
IDSASSNIKLALDKPGKSKRKNVHRKYLQKQIKRCSGLMGTAPPRPPSPSSTDTSAKRPPGAPGASTVATPAHCK  
AAPRREATQAAAAASLQSRSLAALFDSLRLHIPGGAETAGGAVAAASVPGLGAASSAGDRAGTSASSVAPGTRKVP  
L RARNLPPSFFTEPSRVGCCGGGGPSGQGVSLGDLEKGAEEVEFFELLAPDFSTGNDSSGVLLAADPLDFPAGATV  
LRGPLELESVPFEQAMVGNLLYPEPWNTSPSCQSKKPLPGVRGNMNLNEPVRLLYPTALDSPGGEDAPALASF  
TPFFPDCALPPPQVSYDYSAGYSRAVYPSLWRPDGVWEGASGEEGAHPD PLRARNLPPSFFTEP

rs:XP\_009465744 [XP\_009465744] PREDICTED: protein **FAM181A** [Nipponia nippon].>tr:A0A091WCS4\_NIPNI [A0A091WCS4] SubName: Full=Protein **FAM181A** {ECO:0000313|EMBL:KFQ99425.1}; 127..141

MASDSEVKTLNLFVNLASSDIKAALDKSAPCRRSVDHRKYLQKQLKRFSQKYSRIPRCHPSKPPECGWR  
RGAEDRGRGPQPEAPDPSPHNGAAAEEKGLRTAEAEESLSGERVLQEQNPEATRPDQVPMRKRQLPASFWEEP  
RPA QSLGAFRALPEGLPAPRDPPEEGKSKRSLDAGPESPPDSAPHPGKDPAGVLSGRVGAWTCCPFPCPGPG  
VYQPPGTLPPSPFPGLGGLWRKSAATLPAEVPHFCKEADGTGQKLYRPVVLKPIPTKPAVPPPIFNVFGYL  
PMRKRQLPASFWEEP

rs:XP\_009870156 [XP\_009870156] PREDICTED: LOW QUALITY PROTEIN: protein **FAM181A**-like [Apaloderma vittatum]. 127..141

MASDSEVKTLNLFVNLASSDIKAALDKSAPCRRSVDHRKYLQKQLKRFSQKYSRIPRCHPSKPSEC  
GWR RGPEDQGRGPQPEAPDPSPHGGATAEKVLLTAEVEESLAGERVLQEQNPEATRPDQVPMRKRQLPASFWEEP  
RPA QSLPARVFPASPEGLPAPRDPPEHEGKSKRSLDSAGPESPPPEPAPHTGEKDPAGVFSGRVGAWTCCPF  
SCPGPG VYQPPGALPPSPFPGLGGLWRKSGAKLPAEXCRTXXXXXXXXYRPVVLKPIPTKPAIPPIFNVFSYL  
PMRKRQLPASFWEEP

rs:XP\_009893824 [XP\_009893824] PREDICTED: protein **FAM181A** [Charadrius vociferus]. 127..141

MASDSEVKTLNLFVNLASSDIKAALDKSAPCRRSVDHRKYLQKQLKRFSQKYSRIPRCHPGKPPESGWR  
RVAEDRGRVPPPELDPDPSPHGGAATEKVLRTTEAEESLAGERVLQEQNPEASRPDQVPMRKRQLPASFWEEP  
RPA QSLPTRAFFPPGLEGLPAPRDPPEYEGKSKRSLDAGPESPPDAAPHGKEDPTGVLSGRVGAWTCCPFPCPGPG  
VYQPPGALPPSPFPGLRRLWRKLPMSVPLSFLQLRYIPVRPVLSSSVTPAQDRWLKATKTWVSQ  
PMRKRQLPASFWEEP

rs:XP\_006767680 [XP\_006767680] PREDICTED: protein **FAM181A** [Myotis davidii]. 129..143

MASDSDVKMLNLFVNLASSDIKAALDKSAPCRRSVDHRKYLQKQLKRFSQKYSRLPRGLPGRGAEAPLR  
RGPEDRPGRLPLNPGPDASPSGGDCKEKALGNPYREECLSREQTLQGNPGAARPGQVPMRKRQLPASFWEEP  
R PTHSYVALEGLVLPREGPPYECKQHCRGLELFGPDMALIPMSPRALAEKEPPKLPVSVLGRVNAWSCPFQYH  
GQPIYPGPPGALPQGPVPSLGLWRKSPASPGELAHPAKDVDVGPGQKVHRPVVLKPIPTKPAVPPPIFNVFGYL  
PMRKRQLPASFWEEP

rs:XP\_010002031 [XP\_010002031] PREDICTED: protein **FAM181A** [Chaetura pelagica]. 127..141

MASDSEVKTLNLFVNLASSDIKAALDKSAPCRRSVDHRKYLQKQLKRFSQKYSRIPRCHPSKPPECVWR  
RGAEDRGRGPQLEAPDPSPHGGAEEKVLQTAEAEESLTAEQVLQEQNPEATRPDQVPMRKRQLPASFWEEP  
RPA PSLPARAFPPAGERLSAPRDSPPYEYEGKSKRSLDAAPESSPESAPHNGEKDPFVLSGQVGAWTCCPFPCPGPG  
VYQPPGTLPPSPFPGLGGLWRKSTA AVLPAEMPPFCKEADGTGQKLYRPVVLKPIPTKPAVPPPIFNVFSYL  
PMRKRQLPASFWEEP

rs:XP\_010143782 [XP\_010143782] PREDICTED: protein **FAM181A** [Buceros rhinoceros silvestris]. 127..141

MASDSEVKTLLNFVNLASSDIKAALDKSAPCRRSVDHRKYLQKQLKRFSQKYSRIPRCHSSKPSECGWR  
RGXEDRGRGPQETPDGPHGGAAAEKVLQTSVEVESLTGERVLQEQNPEAARPDQVPMRKRQLPASFWEEP  
QSLPAGAFPTSPEGFPAPRDPHPHYEGKSKRSRSPGAASPEPSPVPHAREKDPARVLSGRVGAWTCCPFPCPGPG  
VYQPPGALPPSPFPLGLWRKSVATLPAEGPRFCKEAEGAGQKLFPRPVVLKPIPTNPAVPPPIFNVFGYL  
PMRKRQLPASFWEEP

rs:XP\_010159774 [XP\_010159774] PREDICTED: protein **FAM181A** [Eurypyga helias].>tr:A0A093ILT3\_EURHL [A0A093ILT3] SubName: Full=Protein **FAM181A** {ECO:0000313|EMBL:KFV99728.1}; 127..141

MASDSEVKTLLNFVNLASSDIKAALDKSAPCRRSVDHRKYLQKQLKRFSQKYSRIPRCHPSKPPECGWR  
RGAEDRGRGPQPEAPDSSPHGGAATEKVLQTAEEESLTGEQVLQEQNPEVARPDQVPMRKRQLPASFWEEP  
QSLPARAFAPGPEGIPAPRDPSPYEGKSKRSSTAGPESQEPAPHTGEKDPAGVLSGRVGSWTCCPFSCPGPG  
VYQPPGTLPPSPFAGLGLWRKTAALPAEVPHFCKEADSTGQKLYRPVVLKPIPTKPAIPPIFNVFGYL  
PMRKRQLPASFWEEP

rs:XP\_010074409 [XP\_010074409] PREDICTED: protein **FAM181A** [Pterocles gutturalis]. 104..118

MASDSEVKTLLNFVNLASSDIKAALDKSAPCRRSVDHRKYLQKQLKRFSQKYSRIPRCHPSKPPECGWR  
RGAEDRGHAAEESLTGERVLQEQNPEAARPDQVPMRKRQLPASFWEEP  
QSLPARAFAPGPEGILLAPKDP  
YEGKSKWSSDTASPEPSPESAPHAGEKDPAGLLGGVGAWTCCPFPCPGPGVYQPPGTLPPSPFPLGLWRKSA  
ATLPAEVPHFCKEADGMGQNLVLRPVVLKPIPTKPAVPPPIFNVFSYLPMRKRQLPASFWEEP

rs:XP\_010202152 [XP\_010202152] PREDICTED: LOW QUALITY PROTEIN: protein **FAM181A**-like [Colius striatus]. 124..138

MASDSEVKTLLNFVNLASSDIKAALDKSAPCRRSVDHRKYLQKQLKRXXXXXXXXXXXXXXXXXXPAEGGWRRGA  
EERGRGPQPEAPDPGPHGAAAEKVLQAGEAETLARERVLQEQNPEASRPDQVPMRKRQLPASFWEEP  
QSLPARVFPGLSPRDPPLLYEGKSKRSPDIAGPESPESHAGEKDPAEVLSRVSWTCCPFPCPGPGVYQPPG  
ALPPAPFPGLGLWTKSAALLPAEVPHFCKEADSVGQKLYRPVVLKPIPTKPTIPSPIFNVFGYL  
PMRKRQLPASFWEEP

rs:XP\_010210734 [XP\_010210734] PREDICTED: LOW QUALITY PROTEIN: protein **FAM181A** [Tinamus guttatus]. 124..138

MASDSEVKTLLNFVNLASSDIKAALDKSAPCRRSVDHRKYLQKQLKRFSQKYSRIPRCHPSKPAECSVK  
RGAEEGRXRPGAPHPSHHCRAEKALRAAEAEETFPGEQLLQEQNPEPAKPDQVPMRKRQLPASFWEEP  
QSLPARVFPDGLGGLPNSGEPLPYEKKSRRSPEAAGPESPHEPMLHGKKESAKAPGPPTAGRVAAWTCCPFQCPGQ  
PLYQTPGALPPSPFPLGLWRKSAALPGEVQHFCKEADSTGQKLYRPVVVKPIPTKPSVPPPIFNVFGYI  
PMRKRQLPASFWEEP

rs:XP\_010295462 [XP\_010295462] PREDICTED: protein **FAM181A** [Phaethon lepturus]. 24..38

MASDSEVKTLLNFVNLASSDIKAALDKSAPCRRSVDHRKYLQKQLKRFSQKYSRIPRCHPSKPSECGWR  
RGAEDRGRGPQETPDGPHGGAAAEKVLQTSVEVESLTGERVLQEQNPEAARPDQVPMRKRQLPASFWEEP  
QSLPAGAFPTSPEGFPAPRDPHPHYEGKSKRSRSPGAASPEPSPVPHAREKDPARVLSGRVGAWTCCPFPCPGPG  
VYQPPGALPPSPFPLGLWRKSVATLPAEGPRFCKEAEGAGQKLFPRPVVLKPIPTNPAVPPPIFNVFGYL  
PMRKRQLPASFWEEP

rs:XP\_010297499 [XP\_010297499] PREDICTED: LOW QUALITY PROTEIN: protein **FAM181A** [Balearica regulorum gibbericeps]. 126..140

MASDSEVKTLLNFVNLASSDIKAALDKSAPCRRSVDHRKYLQKQLKRFSQKYSRIPRCHPSKPSETGWR  
RGVGDGRGRTTPXXXXXXXXXXPATEKVLRTAEVEEGLTSELVQEQNPEAGRPDQVPMRKRQLPASFWEEP  
QSLPARAFAPGPEGIPAPRDPSPYEGKSKRSSTAGPESQEPAPHTGEKDPAGVLSGRVGSWTCCPFSCPGPG  
VYQPPGTLPPSPFAGLGLWRKTAALPAEVPHFCKEADSTGQKLYRPVVLKPIPTKPAIPPIFNVFGYL  
PMRKRQLPASFWEEP

rs:XP\_010582179 [XP\_010582179] PREDICTED: protein **FAM181A** [Haliaeetus leucocephalus]. 127..141

MASDSEVKTLLNFVNLASSDIKAALDKSAPCRRSVDHRKYLQKQLKRFSQKYSRIPRCHPSKPPECSWR  
RGAEDRGRGPQAEAPDPSPHGGAEEKVLQAAEAEDSLTGERVLQEQNPEATRPDQVPMRKRQLPASFWEEP  
QSLPARAFAPGPEGIPAPRDPSPYEGKSKRSRSPDAGPESPEPALHAGEKDPAGVLSGRVGAWTCCPFPCPGPG

VYQPPGTLPPSPFPGLGLWRKSAAVLPVEVPHFCKEADGTGQKLYRPVVLKPIPTKPAVPPPIFNVFGYL  
PMRKRQLPASFWEEP

rs:XP\_019940329 [XP\_019940329] PREDICTED: protein **FAM181A** [Paralichthys  
olivaceus].>rs:XP\_019940330 [XP\_019940330] PREDICTED: protein **FAM181A**  
[Paralichthys olivaceus]. 104..118

MANADSEVKTLLNFVNLAASDIKAALDKSAPCRRSVDHRKYLQKQLKRFSQRYSRVPRCHTHRPAEYAC  
GRPAAGSSHQSVKGAEKASSDAQDVENAGSAVQVPMRKRQLPASFWEEPKLSPAKKERSLKRGSAGASEGGDNEK  
RKRSCGEDTNKAALPASGRSSADKEPLKLDLSSHHCVSVCGCCPFQYHGQVLHSHIVVPHPLGLWSKAAGTE  
TPEHPYGQKLHTHVVVKPIPTKPTVQSPIFSVFGFI PMRKRQLPASFWEEP

rs:XP\_019941647 [XP\_019941647] PREDICTED: transcriptional coactivator  
YAP1-like isoform X1 [Paralichthys olivaceus]. 46..60

MDAHRGAPPAGQQIVHVRGDSQTELEALFSAVMNPSKATQQPASLPMRMRKLPDSFFRQPDPRGHSRQA  
SSDGGVCGSLTPHHVRAHSSPASLPVNSLSTQAADVAATPIIPDDVPLPHGWEMAKTPTGQRYFLNHLDKTTTWH  
DPRLSQLQSAATQHPIAGTPIHAHSLSNPAPATQAQININPETGPLPEGWEQAVTADGEVFYIDHINKTTAWVDPR  
LAQKMNPGILSLALQQRQEKERLRCKQGLPPQTTPOEAGGRNQMTSGMDHDRNAQTLVPTLDVIRAPNYEPTLN  
GAHSRNESTDSGLSVSSLPRTSDHMLSSVDHMDTGDSEGENSSMSLQESMPVLPMSSEGEELMPCIEGLSSDLLMD  
METVLSGSHMDRDSLLTWL PMRMRKLPDSFFRQP

rs:XP\_019941648 [XP\_019941648] PREDICTED: transcriptional coactivator  
YAP1-like isoform X2 [Paralichthys olivaceus]. 46..60

MDAHRGAPPAGQQIVHVRGDSQTELEALFSAVMNPSKATQQPASLPMRMRKLPDSFFRQPDPRGHSRQA  
SSDGGVCGSLTPHHVRAHSSPASLPVNSLSTQAADVAATPIIPDDVPLPHGWEMAKTPTGQRYFLNHLDKTTTWH  
DPRLSQLQSAATQHPIAGTPIHAHSLSNPAPATQAQININPETAQKMNPGILSLALQQRQEKERLRCKQGLPPQTT  
POEAGGRNQMTSGMDHDRNAQTLVPTLDVIRAPNYEPTLNGAHSRNESTDSGLSVSSLPRTSDHMLSSVDHMDT  
GDSEGENSSMSLQESMPVLPMSSEGEELMPCIEGLSSDLLMDMETVLSGSHMDRDSLLTWL  
PMRMRKLPDSFFRQP

rs:XP\_019943703 [XP\_019943703] PREDICTED: protein **FAM181B** [Paralichthys  
olivaceus]. 155..169

MAVQTAIMNPQFMNFCFSGSVVEYDVEKSLDGGLLGEAENDEYKETTDRDLSFIDSASSNIKLALDKP  
VKSKRKNVHRKYLQKQIKRGTGIITPGNTAEAPVKRQGSPLAQSPLOSKTLPKRQGVQANLQSKSLAALFSPVK  
DIRGEKAKKPLRHRNLPPSFFTEPANCSKVSSTSGMTLKDFFERGNPEAAEFFELLGPDYSNLVSDQDLYQNMPL  
RVQPEMGGLDPATYDSHHLVGGLLYSEPWTS CSGPSK KAGESLRGTGPAQPPLYCQSEAATTGPLEDNALCTLAFF  
NFFTDCPIPVQVYDLSGGYNRANYSSL PLRHRNLPPSFFTEP

rs:XP\_019943987 [XP\_019943987] PREDICTED: transcriptional coactivator  
YAP1 [Paralichthys olivaceus]. 45..59

MDPSQHNPPAGHQIVHVRGDSQTDLETLFSAVMNPKGTIIPQSVPMRMRKLPDSFFKPPPEPKSHSRQAS  
TDAGSGVTLTPHHVRAHSSPASLQLGAVSGGSLSGMASAGASPQHLRQSSYEIPDDVPLPHGWEMAKTTSGQRYF  
LNHIDQSTTWQDPRKALLQMNQAAPANSLPVQQQNLMTPASGSLPDGWEQAITSEGEIYYINHKNKTTSWLDPRL  
DQRYALNQRISQSAPGKAGQLPPSIHSAVMGGNNQMRLQOIEKERLRRLKQQELLRQRPQELALRNQLPTSMDQDG  
STNPVSSPMAQDARTMTANSSDPFLNSGTYHSRDESTDSGLSMSSYSVPRTPDDFLNSVDEMMDTGDLSLPPSMATQ  
PSRFPDYLDIIPGTDVDLGTLEGESMAVEGEELMPSLQEQALSSDILNDMESVLAATKIDKESFLTWL  
PMRMRKLPDSFFKPP

rs:XP\_010789373 [XP\_010789373] PREDICTED: transcriptional coactivator  
YAP1 [Notothenia coriiceps]. 45..59

MDPSQHNPPAGHQIVHVRGDSQTDLETLFSAVMNPKNTIVPPCVPMRMRKLPDSFFKPPPEPKSHSRQAS  
TDAGSGVTLTPHHVRAHSSPASLQLGVVGGGSMGMPPPGASQHLRQSSYEIPDDVPLPPGWEMAKTSGSQRYF  
LNHIDQSTTWQDPRKALLQMNQAAPPSSVPVQQQNMNPASGSLPEAWEQAITSEGEIYYINHKNKSTSWLDPRL  
DPRFGLNQQRITQSAPVKQGGPQQPFMGGNNQMRLQOIEKERMLKQQELLRQRPQELAIRNQLPTSMDQDGIT  
NPVSSPMAQDARIMTANSSDPFLNSGTYHSRDESTDSGLSMSSYSVPRTPDDFLNSVDEMMDTGDLSLPPSMASQPS  
RFPDYLDIIPGTDVDLGTLESESMAVEGEELMPSLQEQALSSDILNDMETVLAATKIDKESFLTWL  
PMRMRKLPDSFFKPP

rs:XP\_010765329 [XP\_010765329] PREDICTED: protein **FAM181A** [Notothenia  
coriiceps]. 104..118

MANADSEVKLLNFVNLAASSDIKAALDKSAPCRRSVDHRKYLQKQLKRFSQKYSRVPRCHTHRSAEFGC  
AKPVGAANQSVKVTESKASLDVQSAEKVRSATEQVPMRKRQLPASFWEEPCLTQTKGDDSHGLKKNPAGPCAGSE  
NENKKRSYDDDAKVTLSSASSRRSTADKDTLKMDSLSSHHCVSVCGCCPFQYHGQVLHSHIVVPHPALGLWSKAAE  
TERPEHPYQKQLHTHVVIKPIPTKPTVQSPIFSVFGFI PMRKRQLPASFWEEP

rs:XP\_010782332 [XP\_010782332] PREDICTED: protein **FAM181B** [Notothenia  
coriiceps]. 155..169

MAVQTAIMNPQFMSFCFPGSVMEYEVEKGLDGSLLGEAENDEYKETTDRDLSFIDSASSNIKLALDKP  
VSKSRKVNHRKYLQKQIKRGTGIIITPGNVADA AVKRQGSPLAQPSLQSKTLPKRQDGVQANLQSKSLAALFSPVK  
DIRGEKAKKPLRHRNLPPSFFTEPANCSKVSSTSGMTLKDRLERGNPEAAEFFELLGPDYSNMVSDQDLYQSMPV  
RVLPEMGGLDPASDAHHLVGGLLYSEPWTS CSGSPSKLEESLRTGPAQPPLYCPSETGSIEDNALCTLAFFPNFF  
TDCSIPQVTYDLSSGGYNRANYSSL PLRHRNLPPSFFTEP

rs:XP\_010791807 [XP\_010791807] PREDICTED: transcriptional coactivator  
YAP1-like isoform X1 [Notothenia coriiceps]. 46..60

MDAHRGVPAAGQQIVHVRGDSQTELEALFNAVMPNSESVRQPPSLPMRMRKLPDSFFRQPDFRGHSRQA  
SSDGGVYGSLLTPPKHSRSQSSPASLPLNSLSTQAADVAVAAAAAALIPDDMPLPHGWEMAKTPTGQRYFLNHV  
DKTTTWHDPRIAQLQSAAAQHPISGTPIHAHSLSNPAPTTLQQNINPETGPLPEGWEKAVTADGEVYYIDHINTT  
TAWVDPRLAQKMI PGLHGLALQQRQEKERLRCKQGLPPQHTQEAGEGPDAPGWTMTGTH  
PMRMRKLPDSFFRQP

rs:XP\_010791808 [XP\_010791808] PREDICTED: transcriptional coactivator  
YAP1-like isoform X2 [Notothenia coriiceps]. 46..60

MDAHRGVPAAGQQIVHVRGDSQTELEALFNAVMPNSESVRQPPSLPMRMRKLPDSFFRQPDFRGHSRQA  
SSDGGVYGSLLTPPKHSRSQSSPASLPLNSLSTQAADVAVAAAAAALIPDDMPLPHGWEMAKTPTGQRYFLNHV  
DKTTTWHDPRIAQLQSAAAQHPISGTPIHAHSLSNPAPTTLQQNINPETAQKMI PGLHGLALQQRQEKERLRCKQ  
GLPPQHTQEAGEGPDAPGWTMTGTH PMRMRKLPDSFFRQP

rs:XP\_019363056 [XP\_019363056] PREDICTED: uncharacterized protein  
LOC109290763 [Gavialis gangeticus]. 210..224

MAAGVIRNPAEFRLPTSFQHSFLHPAVHQDRDFQELSEEEEEEEEEEMEEVELQGNPTAPIPGGERQE  
VTATASLHDAEMTLQLLRFSELISDDIQRVYFGRKAKEEDPDSCNIYEDCFSPQRSGRELYYADLMHLAQSGELDA  
EDSHSAQVPLGQLDQQLWRSICNKDGGQKLGPLAELFEYGLRQYIKQTVSDSRRLRLEKKYAHITPMHRRKLPSS  
FWKEPSPGAGILNTNTPDFSDLLANWTVEPGQELPNASRELASELGRQAMEADQFNVL  
PMHRRKLPSSFWKEP

rs:XP\_019375546 [XP\_019375546] PREDICTED: protein **FAM181A** [Gavialis  
gangeticus]. 126..140

MASDSEVKMLLNFNLAASSDIKAALDKSAPCRRSVDHRKYLQKQLKRFSQKYSRIPRSHPSKSMESNMK  
RGVEDRSRSSHDPALDPNPCRAASEKALRGAEVEENLSGEQGLQEQSPESARPDQVPMRKRQLPASFWEEP  
SLLVGSFPAGLDGLPKSRDLPSYEGKSKKSPDATGPESPPVPVQPSGEKEPIKVPGTSLSGRMNAWSCC  
PFQYHGQPVYQTPGALPQSPFPLGLWRKNTAPQGEIQHFCKEADATGQKLYRPVVLKPIPTKPAVPPPIFN  
VFGYI PMRKRQLPASFWEEP

rs:XP\_019379708 [XP\_019379708] PREDICTED: transcriptional coactivator  
YAP1 [Gavialis gangeticus]. 13..27

MNPKGANVPHTLPMRLRKLKLPDSFFKPPCTRVYSRQASTDAGSAGALTPQHVRHSSPASLQLGAVSPGT  
LTPSGVVTGPGPASSQHLRQSSFEIPDDVPLPPGWEMAKTPSGQRYFLNHIDQTTTWQDPRKAMLSQMNVTAPT  
SPPVQPNLMNSASAMNARITQSAPVKQPPSLAPQSPQGGVMGSGNSNQQQMQRLQQLQMEKERLRLKHQELLRQE  
LALRSQLPTMEQDSGSQNPVSSPGMSQELRTMTTNSDPFLNSGTYHSRDESTDSGLSMSSYSVPRTPDDFLNSV  
DEMMDTGDSISQSNIPSHQNRFPDYLEAIPGTNVLDLGTLEGDMNIEGEEELMPSLQEQALSSDI LNDMESVLAATKL  
DKESFLTWL PMRLRKLKLPDSFFKPP

rs:XP\_010986244 [XP\_010986244] PREDICTED: protein **FAM181A** [Camelus  
dromedarius]. 129..143

MASDSDVKMLLNFNLAASSDIKAALDKSAPCRRSVDHRKYLQKQLKRFSQKYSRLPRGLPSRGAEPHLK  
RVPEDRPGRLPRDSGHNSSPSGGGYKEKALGNPYREECLPKEQTLQGDPEAARPGQVPMRKRQLPASFWEEP  
PTHSYPMGLEGLPREGLPYEGKKHCKGLEPLGPETAPLPTKEPLKMPGVSLVGRVNAWSCC  
PFQYHGQPIYP

GPPGALPQSPVPGLGLWRKSSISPGELVHFCKDVESPGQKVYRPVVLKPIPTKPAVPPPIFNVFGYL  
PMRKRQLPASFWEEP

rs:XP\_010988476 [XP\_010988476] PREDICTED: protein **FAM181B**, partial  
[Camelus dromedarius]. 20..34

GGDAAGPAGGPLVPGARKVPLRARNLPPSFFTEPSRAGGGVCGPSGPGVSLGDLEKGAEEVEFFELLGP  
DYGAGTETGVLLAAESLDVFPPTGAAALRGPPELEPGLFEPFPAMVGSLLYPEPWSAPGCPPTKKPPLAAPRGGLT  
LNEPLRPLYPAAADSPGGEDGPGLLATLAPFFSDCALPPPPLPQQVSYDYSAGYSRTAYSSSLWRADGVWEGASGE  
EGAHRD PLRARNLPPSFFTEP

rs:XP\_010976098 [XP\_010976098] PREDICTED: transcriptional coactivator  
YAP1 [Camelus dromedarius]. 13..27

MNPKTANVPQTVPMRLRKLKLPDSFFKPPPEPKSHSRQASTDAGTAGALTPQHVAHSSPASLQLGAVSPGT  
LTPTGVVSGPAAAPTAQHLRQSSFEIPDDVPLPAGWEMAKTSSGQRYFLNHIDQTTTWQDPRKAMLSQMNVTAFT  
SPPVQNNMNSASGPLPDGWEQAMTQDGEIYYINHKNKTTSWLDPRLDPRFAMNQRISQSAPVKQPPPLAQSPQ  
GGVMGGGSSNQQQMRLQQLQMEKERLRLKQQLLRQAMRNINPSTANSPKCQELALRSQLPTLEQDGGTQNPVS  
SPGMSQELRTMTTNSDDPFLNSGTYHSRDESTDSGLSMSSYSVPRTPDDFLNSVDEMDTGDITINQSTLPSQQNRF  
PDYLEAIPGTNVDLGTLEGDMNIEGEEELMPSLQEQALSSDILNDMESVLAATKLDKESFLTWL  
PMRLRKLKLPDSFFKPP

rs:XP\_007094995 [XP\_007094995] PREDICTED: protein **FAM181A** [Panthera  
tigris altaica].>rs:XP\_007094996 [XP\_007094996] PREDICTED: protein **FAM181A**  
[Panthera tigris altaica]. 129..143

MANDSDVKMLLNFNVLASSDIKAALDKSAPCRRSVDHRKYLQKQLKRFSQKYSRLRPLRGLPGRGAEPHLK  
RGPEDRPGRLPLDSGHDSRPGGGGCKEKALGNPYREECLSKEQTLQGNPEAARPGQVPMRKRQLPASFWEEP  
ATHSYPLGLDGGPGPREGPPYEGKKHCKGLEPLDPETAPVPASPRAPAEKEPLKMSGVSLVGRVNAWSCCQPFQYH  
GQPVYPGPPGALPQSPVPGLSLWRKSPASPGELAHFCKDVDPGQKVYRPVVLKPIPTKPAVPPPIFNVFGYL  
PMRKRQLPASFWEEP

rs:XP\_015439574 [XP\_015439574] PREDICTED: transcriptional coactivator  
YAP1 isoform X1 [Dufourea novaeangliae]. 46..60

MALNQDQDQLSKSNLVVRMDQNSSEDLQALFDSVLKPDSCRPLQVPLRMRNLKLPDSFFNPPSTGSKSPSI  
SHSRENSADSAFGTAPGAGAGAGGNAPGTGTQGTGPASGQPTSGNTAGSGTNAAGAAAAAAGLTVAHPR  
AHSSPASLQQTYSAAQAPQHPAPQPHARHHHHQKQRSYDVISTVDDLGLPLPHGWQARTPEGQIYFLNHLTRTTT  
WEDPRKTAANVAAVAAVDNGKTTSAATNSLGLPLPDGWEQARTPEGEIYFINHQTRTTSWFDPRIPHTLQRAP  
TSGAMLQPNWLQQTGGGIQSNQTLQACQKLRQLQSLQMERERLQKQRQOEIMRQQLMLRQSTTDAAMDPLSLGI  
NEQHARQESADSGGLGSAISLPHTPEDFLANIDNMDGTSDDGAPMETPDLSTLSDNIDSTDDLVPQLSEDF  
SSDILDDVQSLINPNTTKPENVLTLW PLRMRNLKLPDSFFNPP

rs:XP\_015439575 [XP\_015439575] PREDICTED: transcriptional coactivator  
yorkie isoform X2 [Dufourea novaeangliae]. 46..60

MALNQDQDQLSKSNLVVRMDQNSSEDLQALFDSVLKPDSCRPLQVPLRMRNLKLPDSFFNPPSTGSKSPSI  
SHSRENSADSAFGTAPGAGAGAGGNAPGTGTQGTGPASGQPTSGNTAGSGTNAAGAAAAAAGLTVAHPR  
AHSSPASLQQTYSAAQAPQHPAPQPHARHHHHQKQRSYDVISTVDDLGLPLPHGWQARTPEGQIYFLNHLTRTTT  
WEDPRKTAANVAAVAAVDNGKTTSAATNSLGLPLPDGWEQARTPEGEIYFINHQTRTTSWFDPRIPHTLQRAP  
TSGAMLQPNWLQQTGGGIQSNQTLQACQKLRQLQSLQMERERLQKQRQOEIMRQQLMLRQSTTDAAMDPLSLGI  
NEQHARQESADSGGLGSAISLPHTPEDFLANIDNMDGTSGEISSQMEHPWRHQTFLL  
PLRMRNLKLPDSFFNPP

rs:XP\_011184542 [XP\_011184542] PREDICTED: transcriptional coactivator  
yorkie [Zeugodacus cucurbitae].>tr:A0A0A1WE41\_ZEUCU [A0A0A1WE41] SubName:  
Full=Protein yorkie {ECO:0000313|EMBL:JAC97171.1}; 61..75

MSLSKTVVSLNKGNAKEKERSTSKESNNLVVRIDQSDNNLQALFDSVLNPTESKCPQVPPFRMRQLPE  
SFFKPPATASRSPVAHSRANSADSAYDTGSQPNVSQGNISTSSIAAVPATITQPQVTANRLSISHSRAHSSPAS  
LQQTNYNIIGNVMETGACIQDGIQVFTAGAVSFPPGVNAGSGVRMEQVDQSVTKDAPNTIQTFFHKQRSYDVVST  
IQLQNELGPLPPGWQAKTNDGQIYYLNHTTKSTQWEDPRIQLKQOIFQDGLSHNVNLKSKESVNLADNLGLPE  
GWEQAYTESGDVYFINHVNRRTTSWNDPRIPDFLQKPVKSQKPGPSWLNQIHIEKEQDYFKPSSEQSSLTRQNGSL  
QMDPFLSGDNHARQESSDGLSLSSNTFSTTADLMPNIDDSMDCISESGSLNALSGIDCPDNLVSSLQLEDNICN  
EMFSDVHSMNLNATATKPDTLDWYKIN PFRMRQLPESFFKPP

rs:XP\_015806780 [XP\_015806780] PREDICTED: transcriptional coactivator YAP1 [Nothobranchius furzeri].>tr:A0A1A7Z8P0\_NOTFU [A0A1A7Z8P0] SubName: Full=Yes-associated protein 1 {ECO:0000313|EMBL:SBP38863.1};>tr:A0A1A8D695\_9TELE [A0A1A8D695] SubName: Full=Yes-associated protein 1 {ECO:0000313|EMBL:SBQ28853.1}; 45..59

MDPSQHNPAGHQIVHVRGDSETDLETLEFNIVMNPSSANIPHSVPMRQRKLPDSFFNPPEPKSHSRQAS  
TDAGSGGVLIPIHHVRAHSSPASLQLGAVSAGLSGLAPAGASPOHLRQSSYEIPDDVPLPAGWEMAKTSSGQRYF  
LNHIDKTTTWDPRKPLLQMNQTSPPSSVVPVQOTLMNPTSGPLPEGWEQAITPEGEIYYINHKNKTTSWLDPRL  
EPRYGLNQQRNTQSAPGKQGGPLPTNSHGGVNMRLQOIEKERLRKQHEVLRQRPQELALRNQLPTSMEQDGPT  
NPVSSPLAQDARTMTANSSDPFLNSGTYHSRDESTDSGLSMSSYSVPRTPDDFLNSVDEMDTGDQLPPSMATQPN  
RFPDYLDIAIPGTDVDLGTLESESMAVEGEELMPSLQEPSSDILSDMESVLAATKIDKESFLTWL  
PMRQRKLPDSFFNPP

rs:XP\_015806792 [XP\_015806792] PREDICTED: protein **FAM181B** [Nothobranchius furzeri]. 155..169

MAVQTAIMNSQFMSFCFPDSVMEYDVEKSLDGSLLCEAENDDDFKETTDRDLSFIDSASSNIKLALDKP  
VKSKRKVNHRKYLQKQIKRCTGIITPGHVAEGPVERQSGPMQPGPLQSKTTPKRDEVQASLQSKSLAALFSPA  
EVRGEKAKKPLRHRNLPPSFFTEPANCSKVIISTSGMTLKDRLERGNPEAAEFFELLGPDYSNMIGDQDLYQGA  
PLRAQPDGLGDPVSYDAHHLVGGLLYSEPWTSCSGPPKLGESLRTGLAQPPPIYSQSEEASGSIDDSGLSSLA  
FNSFFTDCSIPQVTYDLNCGYSKANYSSP PLRHRNLPPSFFTEP

rs:XP\_015816184 [XP\_015816184] PREDICTED: transcriptional coactivator YAP1-like isoform X1 [Nothobranchius furzeri]. 47..61

MDAHRGGAPPAGQQVVHVRGDSKTELEALFSAVMDPGKASRQPQSLPMRMRKLPDSFFKPPPEPRGHSRQ  
ASSDGGVCGSLAPHHVRAHSSPASLPVNSLTAQADADVAATPIIPDDVPLPDGWELAKTLTGQRYFINHLEKTTT  
WLDPRLSQLQSTAAQHPIISCAPIHTHSFSNPAPTTQAQHIHPETGPLPEGWEQAVTADGEVYIDHINKNTTWVD  
PRLAQKMNPAIILGLAMQQRQEKERLRCKQGLPPQITPQDAAGRNIIPRGMDHDSRQMLVPSVDARIRALNQEPT  
LNGAHSRNESTDSGLSVSSLPRTSDHLLSSVDHMDTGDSSSEPSSVTMQETMPVLPITEGEELMPCIPDGLNSDLL  
MDMETVLSGPHMDRDSLLTWL PMRMRKLPDSFFKPP

rs:XP\_015816186 [XP\_015816186] PREDICTED: transcriptional coactivator YAP1-like isoform X2 [Nothobranchius furzeri]. 47..61

MDAHRGGAPPAGQQVVHVRGDSKTELEALFSAVMDPGKASRQPQSLPMRMRKLPDSFFKPPPEPRGHSRQ  
ASSDGGVCGSLAPHHVRAHSSPASLPVNSLTAQADADVAATPIIPDDVPLPDGWELAKTLTGQRYFINHLEKTTT  
WLDPRLSQLQSTAAQHPIISCAPIHTHSFSNPAPTTQAQHIHPETAQKMNPAIILGLAMQQRQEKERLRCKQGLPPQ  
ITPQDAAGRNIIPRGMDHDSRQMLVPSVDARIRALNQEPTLNGAHSRNESTDSGLSVSSLPRTSDHLLSSVDHM  
DTGDSSEPSSVTMQETMPVLPITEGEELMPCIPDGLNSDLLMDMETVLSGPHMDRDSLLTWL  
PMRMRKLPDSFFKPP

rs:XP\_015825575 [XP\_015825575] PREDICTED: protein **FAM181A** [Nothobranchius furzeri].>tr:A0A1A8A856\_NOTFU [A0A1A8A856] SubName: Full=Family with sequence similarity 181, member A

{ECO:0000313|EMBL:SBP51307.1};>tr:A0A1A8EA08\_9TELE [A0A1A8EA08] SubName: Full=Family with sequence similarity 181, member A {ECO:0000313|EMBL:SBQ42396.1}; 98..112

MANADSEVKTLLNLFVNLASSDIKAALDKSAPCRRSVDHRKYLQKQLKRFSQKYSRVPRCHAHKSADHRC  
LKPPGTAAQETASHAQDVENVGIEVEQVPMRERQLPASFWEEPQTKAKRDKTGLGLKKSAGISSDGSKNEMRKA  
ALDDGANASSRRNSADKEVLKLDVTSHHFVSVGCCPLQYHGHVHLHSHIVVPHPLWSKAAAGTESEHPFGPR  
IHTHVVKPIPTKTPQSPIFSVFGFI PMRERQLPASFWEEP

rs:XP\_011558709 [XP\_011558709] PREDICTED: LOW QUALITY PROTEIN: transcriptional coactivator YAP1 [Plutella xylostella]. 44..58

MALNSDAEQKSTPFVVRVDQSDSVLQSLFDTVLKPKDRPLQVPLRMRQLPKSFFNPPSTGSKSPSVSH  
SRENSADSAFGSTSAGGTVPVSHSRAHSXQVSPSRAPSSPASLQQTYYAAAGQONQPPPLHHQHAKORSYDVGPHL  
QDDLGLPLPGWEQARTPEGQIYYLNHITKTTTWTEDPRKSLAAQVQAVQHQSAEPLGLPLPDGWEQAAATPEGEVYF  
INHAARTTSWFDPRIPQHLQRTPSAGRELRKQROQEIIRLQOELMARQASSIVSSLATSAGAAADLPIDPFLSGLT  
DHQRQESADSGLGMVAVTQSYMPHTPEDFLSSMDDRMDCSTESGANLDTNDISLADNDLLGEFTNDILLDDVQSL  
INSTPSKPDNVLTWL PLRMRQLPKSFFNPP

rs:XP\_003962706 [XP\_003962706] PREDICTED: protein **FAM181A** [Takifugu rubripes]. 102..116

MANADSEVKTLLNLFVNLAASSDIKAALDKSAPCRRSVDHRKYLQKQLKRFSQKYSRMPRCHMHRSTDHGC  
AKPAGAVYQKLAMKTDVDPVAEKTGTGASEQVPMRKRQLPASFWEEPKLTQTRRELLGLREDAGGDPEVSERETR  
KRSRDADALASLSASGRRGSADKSSKLDLTSGHCVSVCGCCPFQYHGHHILHGHI VFPHPSPWSKAAVTNAGRP  
EHPYGPQIHTHV VVKPIPTKPAVQSSIFSVFGFI PMRKRQLPASFWEEP

rs:XP\_003968635 [XP\_003968635] PREDICTED: transcriptional coactivator  
YAP1 isoform X1 [Takifugu rubripes].>tr:A0A3B5KIA1\_TAKRU [A0A3B5KIA1]  
SubName: Full=Yes-associated protein 1  
{ECO:0000313|Ensembl:ENSTRUP00000053107}; 44..58

MDPSQHNPPAGHQIVHVRGDSETDLEALFNAVMPKSSVPPSVPMMRKL PDSFFKPPPEPKSHSRQAST  
DAGSGGTLTPHHVRAHSSPASLQLGAVSGGSLPGLPPTSPQHLRQSSYEIPDDVPLPPGWEMAKTASGQRYFLNH  
IEQTTTWDPRKALLQMNQAAPANSVPVQQQLNMPASGPLPDGWEQAF TSEGEIYYINHKNKTTSWLDPRLDAR  
FAMNQQRITQSAPVKQGGPLPNTHSQMRLQOMEKERLRKQQLRQRPQELALRNQLPTSMEQDGTNPVSSP  
MAQDARTMTANSSDPFLNSGTYSRDESTDSGLSMSSYSVPRTPD DFLNSVDEMDTGDPLPTSMATQPSRFPDYLD  
DAIPGTDVDLGTLESESMAVEGEELMPSLQEQALSSDILNDMESMLAATKIDKESFLTWL  
PMRMRKL PDSFFKPP

rs:XP\_011606936 [XP\_011606936] PREDICTED: transcriptional coactivator  
YAP1 isoform X2 [Takifugu rubripes]. 44..58

MDPSQHNPPAGHQIVHVRGDSETDLEALFNAVMPKSSVPPSVPMMRKL PDSFFKPPPEPKSHSRQAST  
DAGSGGTLTPHHVRAHSSPASLQLGAVSGGSLPGLPPTSPQHLRQSSYEIPDDVPLPPGWEMAKTASGQRYFLNH  
IEQTTTWDPRKALLQMNQAAPANSVPVQQQLNMPASAMNQQRITQSAPVKQGGPLPNTHSQMRLQOMEKERL  
RLKQQLRQRPQELALRNQLPTSMEQDGTNPVSSPMAQDARTMTANSSDPFLNSGTYSRDESTDSGLSMSSY  
SVRTPD DFLNSVDEMDTGDPLPTSMATQPSRFPDYLD AIPGTDVDLGTLESESMAVEGEELMPSLQEQALSSDIL  
NDMESMLAATKIDKESFLTWL PMRMRKL PDSFFKPP

rs:XP\_003968705 [XP\_003968705] PREDICTED: protein **FAM181B** [Takifugu rubripes]. 155..169

MAVQTAIMNPQFMNFAFPGSVMGYDMEKGLDEGLLCEADNEEDYRETT RDLLSFMD SASSNIKLALDKP  
VKSKRKVNHRKYLQKQIKRGTGIIITPGNVAEAPVKRQV SPLTQSSPLQSKTTPPKREGIQASLQSKSLAALFSPVK  
DVRGEKTKKPLRHRNLPPSFFTEPVSCSKVSSTSGM TLRDLERANPETADFFDLLGPDYSSMVSEQDLYQGIPL  
RVQPD LGGDPACYDTHHLVGGLLYPEPWTSCSDTSKKAGSGPRSGPHQLPAYCPSDPCGPMEDHSLCTLAFPNL  
FTDCSTPQVTYDLNGACNR PQYSSL PLRHRNLPPSFFTEP

rs:XP\_011609930 [XP\_011609930] PREDICTED: transcriptional coactivator  
YAP1-like isoform X1 [Takifugu rubripes].>tr:A0A3B5K7C1\_TAKRU [A0A3B5K7C1]  
SubName: Full=Uncharacterized protein  
{ECO:0000313|Ensembl:ENSTRUP00000049270}; 46..60

MDAHHGAPPAGQQIVHVRGDSQTELEALFSAVMNP SKASRQPPSLPMRMRKL PDSFFRQPDSRGHSRQA  
SSDGGVCSSSLTPHHIRAHSSPASLPVNSLSAQAPDVAAAPIIPDDVPLPHGWEMAKTPTGQRYFLNHLDKTTTWH  
DPRIAQLQSAQAQRPIAGTPVHTHSLSNPAQ PATQPQNMS PETGPLPEGWEQAVTADGEVYYIDHINKTTTWDV  
PRLAQKMNPNILGSLQQRQEKERM RQQGLPPLPQEAAGRNVQVSGGLDHRNTQMLVPPLDVIRAPNHEPT  
LNGAHSRNESTDSGLSVSSLPRTSDHMLSSVDHMDTGDSGDASSMTLQESMPVLP MSEGEEELIPCIPEGLGSDLL  
MDMETVLSGSHMDRDSLLT WL PMRMRKL PDSFFRQP

rs:XP\_011609931 [XP\_011609931] PREDICTED: transcriptional coactivator  
YAP1-like isoform X2 [Takifugu rubripes]. 46..60

MDAHHGAPPAGQQIVHVRGDSQTELEALFSAVMNP SKASRQPPSLPMRMRKL PDSFFRQPDSRGHSRQA  
SSDGGVCSSSLTPHHIRAHSSPASLPVNSLSAQAPDVAAAPIIPDDVPLPHGWEMAKTPTGQRYFLNHLDKTTTWH  
DPRIAQLQSAQAQRPIAGTPVHTHSLSNPAQ PATQPQNMS PETAQKMNPNILGSLQQRQEKERM RQQGLPPLP  
LPPQEAAGRNVQVSGGLDHRNTQMLVPPLDVIRAPNHEPTLNGAHSRNESTDSGLSVSSLPRTSDHMLSSVDHM  
DTGDSDASSMTLQESMPVLP MSEGEEELIPCIPEGLGSDLLMDMETVLSGSHMDRDSLLT WL  
PMRMRKL PDSFFRQP

rs:XP\_016386960 [XP\_016386960] PREDICTED: uncharacterized protein  
LOC107722971 [Sinocyclocheilus rhinocerosus]. 154..168

MAASVIRTL SNLGLAKFPFCFFPAEDEEETEEEEEYEEELREDSLEEEEDALASESQEEEPWSFDSYPNN



AEMTNQLLRFAELISSDVQRYFGRSQDPDACDIYAEKPCPKVGGRRQRYADFIKVASSGQGEPEPESLGPLAELFQ  
DAQRKGRGLPMSQRRLLPVSWTEPFQAQQLDMLGDTSMQDNSRSMINTSESSININTSLSMFNSNSVCTMTSSSIS  
GTLSSSSTPDFSDLLAHWAMDRENPNFNCDYPLS PMSQRRLLPVSWTEP

rs:XP\_016391649 [XP\_016391649] PREDICTED: protein **FAM181B**-like  
[Sinocyclocheilus rhinoceros]. 156..170

MAVQAAIMNSQFLNFCFPGSVMDYEVERGLEGLLGEVDCEGDFKETTDRDLSFIDSASSNIKLALDKP  
VKSKRKVNHRKYLQKQIKRCTGIIISPGTTPVQEPCKRQGSPhnPTSNLSSKTPPKKDGIQANLQSKSLAALFNSA  
KDVRGERAKKPLRHRNLPPSFFTEPANSSRVSTSTSGMSLKDLEGRTPDAAEFLELLGPDYSNMVSEQDLFHTAP  
IRIQQEVTVGPEPYDSHHFVSGGFLYTEPWGTCSSSTPKKSGDMRTVPVQPNLYTHTDLSGSPVVEQSSPCALTF  
NFFTDCSTPSVSYDLVNGYNRGSFSSL PLRHRNLPPSFFTEP

rs:XP\_016391824 [XP\_016391824] PREDICTED: protein **FAM181B**-like, partial  
[Sinocyclocheilus rhinoceros]. 4..18

YATPLRHRNLPPSFFTEPANSSRVSTSTSGMSLKDLEGRTPDAAEFLELLGPDYSNMVSEQDLFHTAPIR  
IQQEVTVGPEPYDSHHFVSGGFLYTEPWGTCSSSTPKKSGDMRTVPVQPNLYTHTDLSGSPVVEQSSPCALTF  
FTDCSTPSVSYDLVNGYNRGSFSSL PLRHRNLPPSFFTEP

rs:XP\_016408307 [XP\_016408307] PREDICTED: protein **FAM181B**-like  
[Sinocyclocheilus rhinoceros]. 157..171

MAVQAAIMNSQFLNFCFPGSVMDYEVERKLEGLLGEVDCEGDFKETTDRDLSFIDSASSNIKLALDK  
PVKSKRKVNHRKYLQKQIKRCTGIIISPGTTPVQEPCKRQGSPTPTSNLSGKTPPKKDGMQASLQSKSLAALFNS  
AKDVRGERAKKPLRHRNLPPSFFTEPANSSRVSTSTSGMSLKDLEGRTPDAAEFLELLGPDYSNMVSEQDLFHTA  
PIRIQQEVTVGPEPYDSHHFVSGGFLYTEPWGTCSSSTPKKSGDMRTVPVQPNLYTHTDLSGSPVVEQSSPCALTF  
SNFFTDCSAPPVSYDLVNGYNRGSFSSL PLRHRNLPPSFFTEP

rs:XP\_003725473 [XP\_003725473] PREDICTED: uncharacterized protein  
LOC100891483 [Strongylocentrotus purpuratus]. 243..257

MAMMNYQVPPSYPHSMQNYMDYSMHNPHIHNPQIQNLPHIHFQDEYYVDDSDDES  
NFTSEDIYEDDRMSDELFEFEPNAVNLQLLDFAETASMDIQKFFGKKRVLDEPELIADCNKKVRLSGRELYYADLLR  
VAQHGDSDADPCKEASEPNRI IRYGDDENSPDLTNSLSPKSMDSNGLGPLEELFNVAERSVCYNGHMLPMYGYSYQ  
SGAWMPPTDNVNDTSLSGKPPVTPWSKRAMPKSFTEPVSSSVPRIEVDQRFVALSLPLDTPCVGVSATSNQHEA  
PDFSDLIATMESDEHDHGLPRVTPVHG PWSKRAMPKSFTEP

rs:XP\_800421 [XP\_800421] PREDICTED: uncharacterized protein LOC586927  
[Strongylocentrotus purpuratus]. 139..153

MDKLVKPSASTSPPTANNGKRGPTCSLSGSSSSSEGEESDHEEIPSPCSSTSSGPTYVRPPGFKHHGQE  
IKVQEQRPKVNTSVRIKRIKQSMKDVLPVLSHVTSHPVTKVTMEEKTTGVQVLPSPGMKTKVRKEPIPMRLRA  
LPQSFQQPNTVNSASPGSMYSVLPLCKMEQNSDLADIRPVTTPSDGENVESREGDQPDVRLKERKDTLVDRD  
SLVIKLEKDKERDLSREREVSPRDRDYSPREKDLSPRDRDTGREKESPRDKEKVRDGLKEGAGLESSKQLPPEAK  
KKQPRPPPRIVRVSPANSELLAKLFEGFDGDKKKIVRRGRPKREYNPQAAVLAVAAAQTAANTSNNNNTTPT  
GNNASNPVTTLHHPYLTGDDPYMIDSVAEGLLPLMSLESRRQSSGSSQLAIVTIRGDNNRMLSLPSLSVEQNHS  
AILSELVKAL PMRLRALPQSFQQP

rs:XP\_011678315 [XP\_011678315] PREDICTED: transcriptional coactivator  
YAP1 isoform X1 [Strongylocentrotus purpuratus]. 45..59

MEPAGGRKQNAVHVVRGDSGAELDDLFRNVLNTPEAADKVPSQVPWRKRNPASFFQEPRISSHRESSA  
DSTNYSGNMNSASHEIASRSLGPQGMTIAHSRAHSSPASLQEMRNINPQDVIRNQHLRQQSYDISDTDNPPLPSG  
WEMAVTPTGQKYFLDTPNSHNSQTTWEDPRKQPSPVNPQLSKPNTNTNNNQVQIIMQNGQPLPSMHDGLPL  
PINWEQAVTPEGEVYFINHVERTTTWLDPRIAMRAPGTVQAAAAALQSQNNSNPPPSHSVATASSTTSLSQQTP  
QLPPPPPPPIISPPQPPSQGGPMTQQQQLQKLRQLRVLMERDCLQRQHMRILQQAQQNPKSLSSCPNLFPRSD  
RFQNELALRRELRLDLPNNNNNDSITGGTDPFLSSSNTTNFHRREESGDSGCGLSNVSHPRTPEDLLNTLEDMS  
SEAPPTDRKPLDKQAPRPLPPLASMGDFLETLPSTNVDMASMDTMDPSDSGTAVTSMDSDDLVPVSLPEALDSDIL  
SDVGDVGDVNNFLTWL PWRKRNPASFFQEP

rs:XP\_789542 [XP\_789542] PREDICTED: transcriptional coactivator YAP1  
isoform X2 [Strongylocentrotus purpuratus]. 45..59

MEPAGGRKQNAVHVVRGDSGAELDDLFRNVLNTPEAADKVPSQVPWRKRNPASFFQEPRISSHRESSA  
DSTNYSGNMNSASHEIASRSLGPQGMTIAHSRAHSSPASLQEMRNINPQDVIRNQHLRQQSYDISDTDNPPLPSG

WEMAVTPTGQKYFLDHSNQTTWEDPRKPQPPSVPNQLSKPNTNTNNNQVQOIIMQNGQPLPSMHDLGPLPINW  
EQAVTPEGEVYFINHVERTTTWLDPRIAMRAPGTVQAAAAALQSQNNNSNPPPSHVSATASSTTSLSQQTPQLPP  
PPPPPI SPPQPPSQGGPMTQQQQQLQOKLRLQRVLMERDCLQRQHMRILQQAQQNPKSLSSCPNLFPRSDRFQN  
ELALRRELRLDLSLNNNNNDSITGGTDPFLSSSNTTNFHRREESGDSGCGLSNVSHPRTPEDLLNTLEDMSSEAP  
PTDRKPLDKQAPRPLPPLASMGDFLETLPSTNVDMASMDTMDPSSDGTAVTSMDSDDLVPVSLPEALDSDILSDVG  
DVGDVNNFLTWL PWRKRNPASFFQEP

rs:XP\_011939172 [XP\_011939172] PREDICTED: protein **FAM181A** isoform X1  
[Cerrocebus atys]. 129..143

MASDSVDMKLLNFVNLASSDIKAALDKSAPCRRSVDHRKYLQKQLKRFSQKYSRLPRGLPGRAAEPYLK  
RGSEDRPGRLLLLDLGPDSSPGGGGGCKEKALRNYPYREECLAKEQLLQGGHPEAAQPGQVPMRKRQLPASFWEEPR  
PTHSHYHVGLEGGGLPGREGPPYEGKKNCKGLEPLGPEIVPVPMSPRALAEKEPLKMPGVSLVGRVNAWSCC  
PFQYHGQPIYPGPLGALPQSPVPSLGLWKKSPAFFPGELAHLCCKDADGLGQKVCRPVVLKPIPTKPAAPPP  
IFNVFGYL  
PMRKRQLPASFWEEP

rs:XP\_011939173 [XP\_011939173] PREDICTED: protein **FAM181A** isoform X2  
[Cerrocebus atys]. 194..208

MPLLEKRSSGERNDAAYRKHRRPGEKKTMACFVVPQVSLVPFLGAAGHQSPSSWKASCGLVMASD  
SDVKMLLNFNVLASSDIKAALDKSAPCRRSVDHRKYLQKQLKRFSQKYSRLPRGLPGRAAEPYLKRGSEDRPGR  
LLDLGPDSSPGGGGGCKEKALRNYPYREECLAKEQLLQGGHPEAAQPGQVPMRKRQLPASFWEEPRPTHSHYHVG  
LEGGGLPGREGPPYEGKKNCKGLEPLGPEIVPVPMSPRALAEKEPLKMPGVSLVGRVNAWSCC  
PFQYHGQPIYPGPLGALPQSPVPSLGLWKKSPAFFPGELAHLCCKDADGLGQKVCRPVVLKPIPTKPAAPPP  
IFNVFGYL  
PMRKRQLPASFWEEP

rs:XP\_011887662 [XP\_011887662] PREDICTED: protein **FAM181A**-like, partial  
[Cerrocebus atys]. 51..65

RVLDLGPDSPPGGGGCKEKALRNYPYREECLAKEQLLQGGHPEAAQPGQVPMRKRQLPASFWEEPRPTH  
SYHVGLEGGGLPGREGPPYEGKKNCKGLEPLGPEIVPVPMSPRALAEKEPLKMPGVSLVGRVNAWSCC  
PFQYHGQPIYPGPLGALPQSPVPSLGLWKKSPAFFPGELAHLCCKDADGLGQKVCRPVVLKPIPTKPAAPPP  
IFNVFGYL  
PMRKRQLPASFWEEP

rs:XP\_011900067 [XP\_011900067] PREDICTED: protein **FAM181B** [Cerrocebus  
atys].>tr:A0A2K5KKB9\_CERAT [A0A2K5KKB9] SubName: Full=Family with sequence  
similarity 181 member B {ECO:0000313|Ensembl:ENSCATP00000001130};  
221..235

MAVQAALLSTHPFVFPFGGGSPDGLGVAFGALDKGCCFEDDETGAPAGALLSGAEGGDVREATRDLLSF  
IDSASSNIKLALDKPGKSKRKNVHRKYLQKQIKRCSGLMGAVPPGPPSPSAADTPAKRPLAAPSAPTVAAPAHGK  
AVPREASQAAAAASLQSRSLAALFDSLHRVPGGAEPAGGAVAAPVAGLGGAGTGGAGGDAAGPAGATAVPGARK  
VPLRARNLPPSFFTEPSRAGGGGCGSPGPDVSLGDLEKGAEEVEFFELLGPDYAGATEAAVLLAAEPLDVFPAGA  
SVLRGPPELESGLFDPAVAVGNLLYPEPWSVPGCPPTKKPPLTAPRGGLTLNEPLRPLYPAAADS  
PGGEDGPGHLASFSPFFPDCALPPPPPPHQVSYDYSAGYSRNAYSSLWRPDAVWEGAPGEEGAHRD  
PLRARNLPPSFFTEP

rs:XP\_012136501 [XP\_012136501] PREDICTED: transcriptional coactivator  
YAP1 [Megachile rotundata]. 46..60

MALNQDVDQLSKSNLVVRIDQNSDSLQALFDSVLKPDSCRPLQVPLRMRNLPSFFNPPSTGSKSPSI  
SHSRENSADSAFGTAAVAAGVGGGAPGGNATGATPATGAXAGLTVAHRAHSSPASLQQTYASAQQAPQHAPQPH  
ARHHHPKQRSYDVISTVDDLGLPLPHGWEQARTPEGQIYFLNHLTRTTTWEDPRKTAANVAVAVAVDNGKST  
SAATNSLGLPLPDGWEQARTPEGEIYFINHQTRTTSWFDPRIPTHLQRAPTSGLMLPQNWLQQQPAGGGIQSNQTL  
QACQQKLRLLQSLQMERERLQKQEQEIMRQOELMLRQSTTDAAMD PFLSGINEQHVRQESADSGLGLGSAYS  
LPHT  
PEDFLANIDDNMDGTS DGGAPMETPDLSTLSDNIDSTDDLVPVSLQSEDFSSDILDDVQSLINPNTTKPEN  
VLTWL  
PLRMRNLPSFFNPP

rs:XP\_018792030 [XP\_018792030] PREDICTED: transcriptional coactivator  
yorkie isoform X1 [Bactrocera latifrons].>tr:A0A0K8V6G4\_BACLA [A0A0K8V6G4]  
SubName: Full=Protein yorkie {ECO:0000313|EMBL:JAI34461.1}; 59..73

MSLSKTVGSLNKGNAKEKSTSKESNNLVVRIDQSDNNLQALFDSVLNPTESKCPQLQVPPFRMRQLPESF  
FKPPATASRSPVAHSRANSADSAYDTGSQPNVSQGNISTSSVAAPVATITQPQVTANRLSISHSRAHSSPASLQ  
QTYNVHIGNVMETSACLQDGIGPVFTTGAVFPFPPSVNAGAAVRMEQGEQPVPKDAPNIQTFFHMKQRSYDVVSTIQ  
LQNELGLPLPPGWEQAKTNDGQIYYLNHTTKSTQWEDPRIQLKQQIFQDGLSHNVNLKKGESVNLADNLGLPEGW

EQAYTESGDVYFINHVNRTTSWNDPRIPDFLQKPVKSQKPGPSWLN IQHIEKEQDYFKPSSEQSSLTRQNGSLQM  
DPFLSGDNHARQESSDSLSSNTFSTTADLMPNIDDSMDCISGNYSESGSLNALSGIDCPDNLVSSLQLEDNI  
CNEMFSDVHSMNLNASATKPD TLDWYKIN PFRMRQLPESFFKPP

rs:XP\_018792031 [XP\_018792031] PREDICTED: transcriptional coactivator  
yorkie isoform X2 [Bactrocera latifrons].>tr:A0A0K8WMQ1\_BACLA [A0A0K8WMQ1]  
SubName: Full=Protein yorkie {ECO:0000313|EMBL:JAI52280.1}; 59..73  
MSLSKTVGSLNKGNAKEKSTSKESNNLVVRIDQSDNNLQALFDSVNLNPTESKCPLQVPPFRMRQLPESF  
FKPPATASRSPSVAHSRANSADSAYDTGSQPNVSOQGNISTSSVAAPATITQPQVTANRLSISHSRAHSSPASLQ  
QTYNVHIGNVMETSACLQDGIGPVFTTGAVPFPPSVNAGAAVRMEQGEQPVPKDAPNIQTFFHMKQRSYDVVSTIQ  
LQNELGLPLPPGW EQAKTNDGQIYYLNHTTKSTQWEDPRIQLKQQIFQDGLSHNVNLKKGESVNLADNLGLPEGW  
EQAYTESGDVYFINHVNRTTSWNDPRIPDFLQKPVKSQKPGPSWLN IQHIEKEQDYFKPSSEQSSLTRQNGSLQM  
DPFLSGDNHARQESSDSLSSNTFSTTADLMPNIDDSMDCISESGSLNALSGIDCPDNLVSSLQLEDNICNEM  
FSDVHSMNLNASATKPD TLDWYKIN PFRMRQLPESFFKPP

rs:XP\_019497991 [XP\_019497991] PREDICTED: protein **FAM181A** [Hipposideros  
armiger].>rs:XP\_019497992 [XP\_019497992] PREDICTED: protein **FAM181A**  
[Hipposideros armiger].>rs:XP\_019497993 [XP\_019497993] PREDICTED: protein  
**FAM181A** [Hipposideros armiger]. 128..142  
MASDSVDMKLLNFVN LASSDIKAALDKSAPCRRSVDHRKYLQKQLKRFSQKYSRLPRGLPGRGAEPHLR  
RGPEDQSGRLSLDSGDSSPGMGSCKEKALGNPYREECLSKEQTLQGQHPEAARPGQVPMRKRQLPASFWEEP  
PHSYVVGLEGGGLGPREGPPYEGKKHCKGVEPLGPEMAPVPMSPRAPVEKEPLKMPGISLVGRVNAWSSCCPFQYHG  
QPIYPGALPPSPVPSLALWRKSPVSSGELAHFCKD VDSLQKQVYRPVVLKPIPTKPTMPPPIFNVFGYL  
PMRKRQLPASFWEEP

rs:XP\_004262408 [XP\_004262408] PREDICTED: protein **FAM181A** isoform X1  
[Orcinus orca]. 180..194  
MKLLQMLLRGSPCCQPEISPPGQLRALPWSRQPPAEPSSWKAPCSGPLVMASDSVDMKLLNFVN LASS  
SDIKAALDKSAPCRRSVDHRKYLQKQLKRFSQKYSRLPRGLPGRGAEPHLKRGSSEDRPGRPLDLSGHSSSPGGGG  
CCKEALGNPYREECLSKEQTLHGPDPEAARPGQVPMRKRQLPASFWEEPRTQSYVVGLEGGGLGPREGPPYEGK  
KHCKGLEPRGPETAPVPASPRAPAEKEPLKMPGVSLVGRVNAWSSCCPFQYHGQPIYPGPPGALPQSPLPSLGLWR  
KSSASPGELAHFCKDVEGPGQKQVYRPVVLKPIPTK PAMPPPIFNVFGYL PMRKRQLPASFWEEP

rs:XP\_004262409 [XP\_004262409] PREDICTED: protein **FAM181A** isoform X2  
[Orcinus orca]. 129..143  
MASDSVDMKLLNFVN LASSDIKAALDKSAPCRRSVDHRKYLQKQLKRFSQKYSRLPRGLPGRGAEPHLK  
RGSEDRPGRPLDLSGHSSSPGGGGCCKEALGNPYREECLSKEQTLHGPDPEAARPGQVPMRKRQLPASFWEEP  
PTQSYVVGLEGGGLGPREGPPYEGKKHCKGLEPRGPETAPVPASPRAPAEKEPLKMPGVSLVGRVNAWSSCCPFQYH  
GQPIYPGPPGALPQSPLPSLGLWRKSSASPGELAHFCKDVEGPGQKQVYRPVVLKPIPTK PAMPPPIFNVFGYL  
PMRKRQLPASFWEEP

rs:XP\_004271880 [XP\_004271880] PREDICTED: protein **FAM181B** [Orcinus orca].  
221..235  
MAVQAALLSTHPFVFPFGFGGSPDGLGSAFGALDKGCCFEDEETGTPAGALLAGAEGGDVREATRDLLSF  
IDSASSNIKLALDKPGKSKRKVNHRKYLQKQIKRCSGLMGAAPPGPSGAADTPAKRPLAAASAQTVPVQAHGK  
AAPRREASQAAAAASLQSQSLAALFDSLHVPGAADPAGVAEAAAPAAGLVGAGAGGVGDAAGPAGGPAVPGARK  
VPLRARNLPPSFFTEPSRAGGGGCGSPGVS LGDLEKGAEEAEFFEMLGPDYAGTEAGVLLAAEPLDVLLTGA  
AVLRGPPELEPGLFEP PAMGGSLLYPEPWSAPGGPTTKKSPLAAPRGGLTLNEPLRPLYPAAADSPGGDDGPG  
LASFTFFSFCALPPPPPPQVSYDYSAGYSRTAYASLWRPDGIWEGAPGEEGAHRD PLRARNLPPSFFTEP

rs:XP\_008270121 [XP\_008270121] PREDICTED: protein **FAM181A** [Oryctolagus  
cuniculus]. 125..139  
MASDSEVKMLLN FVN LASSDIKAALDKSAPCRRSVDHRKYLQKQLKRFSQKYSRLPRGLPSRAAE PHLK  
RGLEDRPGRLLLDSCPDSSPSCKEKALGSALPEECLSHEQALQGQDPEAARPGQVPMRKRQLPASFWEEP  
RTHS YPLGLEGGGLGREGAPYEGKKHCKGLEPLGPETASVPLSPRALADKELLKMPGIPLVGRVNAWSSCCPFQYHGQPI  
YPGPPGALPPSPVPGGLGLWQKSPSRPGELSHFCKD VDLGQKQVCRPVVLKPIPTK PAMPPPIFNVFGYL  
PMRKRQLPASFWEEP

rs:XP\_004394556 [XP\_004394556] PREDICTED: protein **FAM181A** isoform X1 [Odobenus rosmarus divergens].>tr:A0A2U3VI75\_ODORO [A0A2U3VI75] SubName: Full=protein **FAM181A** isoform X1 {ECO:0000313|RefSeq:XP\_004394556.1}; 180..194

MKLLQMLLRGRPAARGLRSARQVSSVFPFGAASHQQSPRSSWKAPGSGPLVMASDSDVKMLLNFNVLAS  
SDIKAALDKSAPCRRSVDHRKYLQKQLKRFSQKYSRLPRGLPGKGAEPHLKRGPEDRPGRLPLDSGQDSSPSGGG  
CYKEKALGNPYREECLSREQTLQRQNPEAARPGQVPMRKRQLPASFWEEP RPPTHSYPLGLEGGGLGPREGPPYEGK  
KHCKGLEPLDPETAPVPASPRALAEKEPLKMSGVSLVGRVNAWSCCPFYHGQPIYAGHPGVLPQSPVPSLGLWR  
KSPASPGELAHFCKDVGPGQKVYRPVVLKPIPTKPAVPPPIFNVFGYL PMRKRQLPASFWEEP

rs:XP\_012415778 [XP\_012415778] PREDICTED: protein **FAM181A** isoform X2 [Odobenus rosmarus divergens].>tr:A0A2U3Z9Y3\_ODORO [A0A2U3Z9Y3] SubName: Full=protein **FAM181A** isoform X2 {ECO:0000313|RefSeq:XP\_012415778.1}; 173..187

MTHLLEPNFLPRCGKVSSVFPFGAASHQQSPRSSWKAPGSGPLVMASDSDVKMLLNFNVLASSDIKAAL  
DKSAPCRRSVDHRKYLQKQLKRFSQKYSRLPRGLPGKGAEPHLKRGPEDRPGRLPLDSGQDSSPSGGGCYKEKAL  
GNPYREECLSREQTLQRQNPEAARPGQVPMRKRQLPASFWEEP RPPTHSYPLGLEGGGLGPREGPPYEGKKHCKGLE  
PLDPETAPVPASPRALAEKEPLKMSGVSLVGRVNAWSCCPFYHGQPIYAGHPGVLPQSPVPSLGLWRKSPASPG  
ELAHFCKDVGPGQKVYRPVVLKPIPTKPAVPPPIFNVFGYL PMRKRQLPASFWEEP

rs:XP\_004408705 [XP\_004408705] PREDICTED: protein **FAM181B** [Odobenus rosmarus divergens].>tr:A0A2U3WIS2\_ODORO [A0A2U3WIS2] SubName: Full=protein **FAM181B** {ECO:0000313|RefSeq:XP\_004408705.1}; 221..235

MAVQAALLSTHPFVFPFGGSPDGLGGAFGALDKGCCFEDDETGTGTPAGALLAGAEGGDVREATRDLLSF  
IDSASSNIKLALDKPGKSKRKNHRKYLQKQIKRCSGLMGAAPPSPGAPDAPAKRPLAAPGAQTVAVPLHGK  
AAPPREASQAAAAASLQSRSLAALFDSLHRVPGGDERAGGSVAAPVAGLGGAGAGGSGGDAAGPAGGTAVPGARK  
VPLRARNLPPSFFTEPSRAGGGCGPSGPGVSLGDLEKGAEEFFELLGPDYAGTEASVLLAAEPLDVFTPTGA  
AVLRGPPPELEPGLFEQPPAMVGSLLYSESWAPGCPPTKKPPLAGPRGGLTLNEPLRPLYPSAADSPPGGEDAPGL  
LASFAPFFSDCALPPPPPPHQQVSYDYSAGYSRTAYSSLWRPDGVWEGAPGEEGAHRD PLRARNLPPSFFTEP

rs:XP\_012423426 [XP\_012423426] PREDICTED: transcriptional coactivator YAP1 [Odobenus rosmarus divergens].>tr:A0A2U3ZXS7\_ODORO [A0A2U3ZXS7] SubName: Full=transcriptional coactivator YAP1 {ECO:0000313|RefSeq:XP\_012423426.1}; 13..27

MNPKTANVPQTVPMRLRKL PDSFFKPPPEPKSHSRQASTDAGTAGALTPQHVAHSSPASLQLGAVSPGS  
LTPGTGVVSGPAAAPTAQHLRQSSFEIPDDVPLPAGWEMAKTSSGQRYFLNHIDQTTTWQDPRKAMLSQMSVTAPT  
SPPVQQSLMTSASGPLPDGWEQAVTQDGEIYYINHKNKTTSWLDPRLDRPFAMNQRVQSAPVKQPPPLAPQSP  
GGVLGSGGSSQQQMRLLQQLQMEKERLRLKQELLRQELALRSQLPTLEQDGGTPNVPVSPGMSQELRTMTTSGS  
DPFLNSGTYHSRDESTDSGLSMSSYSVPRTPDDFLNSVDEMDTGDTINQSTLPSQQNRFPDYLEAIPGTNVDLGT  
LEGDGMNIEGEEELMPSLQEALSSDILNDMESVLAATKLDKESFLTWL PMRLRKL PDSFFKPP

rs:XP\_002198083 [XP\_002198083] PREDICTED: transcriptional coactivator YAP1 isoform X1 [Taeniopygia guttata].>rs:XP\_005516267 [XP\_005516267] PREDICTED: transcriptional coactivator YAP1 isoform X2 [Pseudopodoces humilis].>rs:XP\_017671538 [XP\_017671538] PREDICTED: transcriptional coactivator YAP1 isoform X3 [Lepidothrix coronata]. 13..27

MNPKGANVPHTLPMRLRKL PDSFFKPPPEKAHSRQASTDAGTAGALTPQHVAHSSPASLQLGAVSPGT  
LTPSGVVTGPGAPSSQHLRQSSFEIPDDVPLPAGWEMAKTSPGQRYFLNHIDQTTTWQDPRKAMLSQMNVTAPTS  
PSVQQNIMNSASGPLPDGWEQAMTQDGEIYYINHKNKTTSWLDPRLDRPFAMNQRIQSAPVKQPPPLAPQSPQG  
GVMGGSSSNQQQMRLLQQLQMEKERLRLKHQELLRQALRNINPSTANS PKHQELALRSQLPTMEQDGGSQNPVSS  
PGMSQELRTMTTNSD PFLNSGTYHSRDESTDSGLSMSSYSVPRTPDDFLNSVDEMDTGDSIGQSNIPSHQNRFP  
DYLEAIPGTNVDLGTLEGDGMNIEGEEELMPSLQEALSSDILNDMESVLAATKLDKESFLTWL  
PMRLRKL PDSFFKPP

rs:XP\_012425184 [XP\_012425184] PREDICTED: transcriptional coactivator YAP1 isoform X2 [Taeniopygia guttata].>rs:XP\_014106279 [XP\_014106279] PREDICTED: transcriptional coactivator YAP1 isoform X3 [Pseudopodoces humilis].>rs:XP\_017671540 [XP\_017671540] PREDICTED: transcriptional coactivator YAP1 isoform X5 [Lepidothrix coronata]. 13..27

MNPKGANVPHTLPMRLRKLPSDFFKPPEPKAHSRQASTDAGTAGALTPQHVRHSSPASLQLGAVSPGT  
LTPSGVVTGPGAPSSQHLRQSSFEIPDDVPLPPGWEMAKTPSGQRYFLNHIDQTTTWDPRKAMLSQMNVTAPTS  
PSVQQNIMNSASGPLPDGWEQAMTQDGEIYYINHKNKTTSWLDPRLDPRFAMNQRISSAPVKQPPPLAQSPQG  
GVMGGSSSNQQQQMRLQQLQMEKERLRLKHQELLRQELALRSQLPPTMEQDGGSQNPVSSPGMSQELRMTTNSSD  
PFLNSGTYHSRDESTDSGLSMSSYSVPRTPDDFLNSVDEMDTGD SIGQSNIPSHQNRFPDYLEAIPGTNVDLGLT  
EGDGMNIEGEELMPSLQEQALSSDILNDMESVLAATKLDKESFLTWL PMRLRKLPSDFFKPP

rs:XP\_002200202 [XP\_002200202] PREDICTED: protein **FAM181A** [Taeniopygia  
guttata].>tr:H0ZQV8\_TAEGU [H0ZQV8] SubName: Full=Family with sequence  
similarity 181 member A {ECO:0000313|Ensembl:ENSTGUP00000012999};  
127..141

MASDSEVKTLNLFVNLAASSDIKAALDKSAPCRRSVDHRKYLQKQLKRFSQKYSRIPRCHPSKAPECGWR  
RGAEDRARGPQPEAPEPSPHGGAAADKVMQTAEAEESLTGERVLQEQKPEAARPDQVPMRKRQLPASFWEEP  
QSLTARAFASPEGLQTPRDPYEGKSKRSPDAAGPESPPDTAPHAGEKDPAGPLSGRVGAWTCCPFPCPGPG  
VYQPPGALPPSPFGLGLWRKSAAALPAEVPHFCKEADGQKLYRPMVLKPIPTKPAIPPIFNVFGYL  
PMRKRQLPASFWEEP

rs:XP\_004754834 [XP\_004754834] PREDICTED: protein **FAM181A** isoform X1  
[Mustela putorius furo]. 162..176

MHGTVSSVVPVGAAGHQQSPRSSWTAPCRGPLVMASDSVDMKLLNLFVNLAASSDIKAALDKSAPCRRSVD  
HRKYLQKQLKRFSQKYSRIPRGLPGRGTEPHLKRGPEDRPRGRLLLDPGHGSSPGVVGCKEKALGNPYREECLSK  
EQSLQRQNPAAARPGQVPMRKRQLPASFWEEPRAHSYSLGLELGPREGSPYEGKKHCKGLEPWPDPMAPVPA  
SPRAPAGKEPLKMSGVSLVGRVNAWGYPFQYHGQPIYAGPPGALPQNPVNLGLWRKSPASPGELAHFCKDQV  
PGQKVYRPVVLKPIPTKPAVPPPIFNVFGYL PMRKRQLPASFWEEP

rs:XP\_012912896 [XP\_012912896] PREDICTED: protein **FAM181A** isoform X2  
[Mustela putorius furo].>rs:XP\_004754836 [XP\_004754836] PREDICTED: protein  
**FAM181A** isoform X2 [Mustela putorius furo].>rs:XP\_004754838 [XP\_004754838]  
PREDICTED: protein **FAM181A** isoform X2 [Mustela putorius furo]. 129..143

MASDSVDMKLLNLFVNLAASSDIKAALDKSAPCRRSVDHRKYLQKQLKRFSQKYSRIPRGLPGRGTEPHL  
RGPEDRPGRLLLLDPGHGSSPGVVGCKEKALGNPYREECLSKQSLQRQNPAAARPGQVPMRKRQLPASFWEEP  
PAHSYSLGLELGPREGSPYEGKKHCKGLEPWPDPMAPVPASPRAPAGKEPLKMSGVSLVGRVNAWGYPFQYH  
GQPIYAGPPGALPQNPVNLGLWRKSPASPGELAHFCKDQVDPGQKVYRPVVLKPIPTKPAVPPPIFNVFGYL  
PMRKRQLPASFWEEP

rs:XP\_004763556 [XP\_004763556] PREDICTED: protein **FAM181B**, partial  
[Mustela putorius furo]. 217..231

AALLSTHPFVFPFGGGSPDGLGGAFGALDKGCCFEDDETGTTPAGALLAGAEGGDVREATRDLLSFIDSA  
SSNIKLALDKPGKSKRKNVHRKYLQKQIKRCSGLMGTAVPGPPSPGAADTPAKRPLAAPGAQTVAVPPHGKAAPR  
REASQAAAAASLQSRSLAALFDSLHRVPGGDERAGGSVAARVAGLGGAGAGGSGDAAGSAGGTAVPGARKVPLR  
ARNLPPSFFTEPSRAGSGCGSPGVS LGDLEKAGAEAVEFFELLGPDYAGTEASVLLAAEPLDVFPPTGAAV  
LRGPPELEPGLFEPVPPAMVGSLLYSESWSAPGCPPTKPPPLAAPRGGLTLNEPLRPLYPTAADS PGGEDAPGLLA  
SFAPFFSDCALPPPPPHQVSYDYSAGYSRTAYSSLWRPDGVWEGAPGEEGAHRD PLRARNLPPSFFTEP

rs:XP\_004681652 [XP\_004681652] PREDICTED: protein **FAM181A** [Condylura  
cristata]. 129..143

MASDSVDMKLLNLFVNLAASSDIKAALDKSAPCRRSVDHRKYLQKQLKRFSQKYSRIPRGLPGRGAE  
RGPEDQPGRLPLHSGPDASPGGGGGFQEKALGNPYGEECLAKEQALQGNPEAARPGQVPMRKRQLPASFWEEP  
PHTSYVPGLEGALGPREGPPCEGKRRQRVEPAGPETAPVPLKMPGVS LAGRNVNAWCCPFQYHGQPVYPPGPPGA  
LPQSPVPSLGLWRKSPASPAELAPFCKDQVGLVQKVYRPVVLKPIPTKPAVPPPIFNVFGYL  
PMRKRQLPASFWEEP

rs:XP\_004683765 [XP\_004683765] PREDICTED: protein **FAM181B** [Condylura  
cristata]. 221..235

MAVQAALLSTHPFVFPFGGGSSDGLGGAFGALDKGCCFEDEETGTTPASALLAGTEGGDVREATRDLLSF  
MDSASSNIKLALDKPGKSKRKNVHRKYLQKQIKRCSGLMGAAPPSPGAADAPAKRPLAAPGAQTVAVPAHGK  
VAPRREASQAAAAASLQSRSLAALFDSLHRVPGGAEPVGGTLAAPPAGLGAAGSGGGGGDAIGPLGGTAVPGARK  
VPLRARNLPPSFFTEPSRAGSGACVPSGPGVSLGDLEKAGAEAVEFFELLGPDYGATTEAGVLVAAEPLDVFPPTGA

AVLRGSLELEPSLFEPPPPAMVGSLLYPEPWSVPACPTTKKPPVAAPRGGLTLNEPLRPQYPAPADSPGGEDGPGL  
LASFAPFFSDCALPPPLPPHQVSYDYSASYSRPAISGLWRPDGVWEGAPGEEGAHPD PLRARNLPPSFFTEP

rs:XP\_012585407 [XP\_012585407] PREDICTED: transcriptional coactivator  
YAP1 [*Condylura cristata*]. 13..27

MNPKTANVPQTLPMLRLNLPDSFFKPPPEKSHSRQASTDTGTAGALTPQHTRAHSSPASLTQGSVSPGT  
LTPTGVVSGPAAAPTAQHRLRQPSFEIPDEVPLPAGWEMAKTSSGQRYFLNHIDQTTTWQDPRKAMFSQMNVTAPT  
SPPVQONMMNSPSGGLPDGWEQAMTQDGEIYYINHKNKTTSWLDRPLDPRFGKAMNQRISQSAPVKQPPPLAPQS  
PQGGIMGGSSNQQQMRLQQLQMEKERLRLKQOELLRQVRPQAMRNINPSTANSPKCQELALRSQLPTLEQDGG  
TQNPVSSPGMSQELRTMTTNSSDPFLNSGTYHSRDESTDSGLSMSSYSVPRTPDDFLNSVDEMDTGDITINQSTLP  
SQQNRFPDYLEALPGTNDLGTLEGDGMNIEGELMPSLQEQALSSDILNDMESVLAATKLDKESFLTWL  
PMRLRLNLPDSFFKPP

rs:XP\_012674938 [XP\_012674938] PREDICTED: protein **FAM181A** [*Clupea harengus*]. 118..132

MANADSEVRTLLNFVNLAASSDIKAALDKSAPCRRSVDHRKYLQKQLKRFSKRYSRLPSCRSYRTTELGM  
KNISEDNPVVYSLEGIHQNLNRGKKESVASDLHQSSNLHKNQDQNVQVPMRKRQLPASFWKEPTSSQQSLTASLV  
TVTKETDVPRTIPLVPDGENIYRFNDNNINSLHTFSDSVESTPLKMDLTCRNVDLGCGCYSLQYHGQILQRHLIA  
PRSAFFSVGAPAAAMAVDADRHNPNRLEYHATHVVVKPIPTKPALSSSMFSGFI PMRKRQLPASFWKEP

rs:XP\_019660308 [XP\_019660308] PREDICTED: protein **FAM181A** isoform X1  
[*Ailuropoda melanoleuca*]. 173..187

MAHLELSSPPRCGKVSSVFPFGAASHPQSPRSSWKAPCSGPLVMASDSDVKMLLNFNLAASSDIKAAL  
DKSAPCRRSVDHRKYLQKQLKRFSQKYPRLPRGLPGRGAETHLRGADHRPGRPLPLEAGHDSSPSGGGGCKEKAL  
GNPYREECLSKEQTLQRQNPEAARPGQVPMRKRQLPASFWEEPRTHTSYPLGLEGGGLPREGPPYEGKKHKKWGLE  
PLDPEMAPVPASPRALAEKEPLKMSGVSLVGRVNAWSCCPFYHQGPVYAGPPGALPQSSVPLGLLWRKSPAPP  
ELAHFCKDVGPGQKVYRPPVVLKPIPTKPAVPPPIFNVFGYL PMRKRQLPASFWEEP

rs:XP\_019660309 [XP\_019660309] PREDICTED: protein **FAM181A** isoform X2  
[*Ailuropoda melanoleuca*]. 129..143

MASDSDVKMLLNFNLAASSDIKAALDKSAPCRRSVDHRKYLQKQLKRFSQKYPRLPRGLPGRGAETHLR  
RGADHRPGRPLPLEAGHDSSPSGGGGCKEKALGNPYREECLSKEQTLQRQNPEAARPGQVPMRKRQLPASFWEEP  
RTHSYPLGLEGGGLPREGPPYEGKKHKKWGLEPLDPEMAPVPASPRALAEKEPLKMSGVSLVGRVNAWSCCPFYH  
GQPVYAGPPGALPQSSVPLGLLWRKSPAPPGELAHFCKDVGPGQKVYRPPVVLKPIPTKPAVPPPIFNVFGYL  
PMRKRQLPASFWEEP

rs:XP\_019661666 [XP\_019661666] PREDICTED: protein **FAM181B** [*Ailuropoda melanoleuca*]. 68..82

MQGGDVREATRDLLSFIDSASSNIKLALDKPGKSKRVNHRKYLQKQIKRCSGLMGAAPPGPSVGPVPL  
RARNLPPSFFTEPSRAGGGGXGAAGPGVSLGDLEKGAEEVFFELLGPDYAGATEASVLLAAEPLDVFPTGAAVL  
RGPPELEPGLFEPPPPAMVGSLLYSESWSAPGXPSAKKPPLAAPRGGLTLNEPLRPLYPSAADSPPGGEDGPGLLAS  
FAPFFSDCALPPPPPHQVSYEYSAGYSRTAYSSLWRPDGVWEGAPGEEGAHRD PLRARNLPPSFFTEP

rs:XP\_012686357 [XP\_012686357] PREDICTED: protein **FAM181B** [*Clupea harengus*]. 160..174

MAVQAAIMNSQFLNFCFPGSVMEFGMEKDLEGGLLCTDRDEGDFREATRDLLSFIDSASSNIKLALDK  
PVKSKRVNHRKYLQKQIKRCTGIIAPSSPPQQSPSQATPQQQQQQQPGTFOGKMPKRDGVQANLQSKSLAALF  
NSAAKDNRGERAKKPLRHRNLPPSFFTEPVNFRVTSTSGMTLKDRLERGNPEASEFFELLGPDYSNMLLEQDLF  
QNGPGCLARVQQDVSAAGLEPVSYDSPHYVTGGFVYAEPWTTTCVGPVKVGEEMRTGPEGQASVYSPSDPSAPVA  
LEDSSSCTLAFFPFFTDCSSSQVPYDGLTGGYARGSFSSL PLRHRNLPPSFFTEP

rs:XP\_012686408 [XP\_012686408] PREDICTED: transcriptional coactivator  
YAP1 [*Clupea harengus*]. 45..59

MDPSQHNPPAGHQIVHVRGDSETDLEALFNAVMPKNTILPSPVPMRMRKLPDSFFKPPPEKSHSRQAS  
TDAGTAGTLTPQHVRHSSPASLQLGTVSPGGLSGMAPAGTTPQHRLRQSSYEFDDMPLPPGWEMAKTASGQRYF  
LNHLDQTTTWQDPRKTLQMNPAAPPSPPLVQVQQQQQQQVMAPATGPLEGWEQAITPEGEIYYINHKNKTTSW  
LDRPLDARYAMNPQRLSQGTPVKQGGPLTSPQGGTLGGNSQMRLQQLQMEKERLRLKHQELLRQRPQELALRNQ  
LPVSMEQDGPQTQNPISPPGMAQDARTMTTNSSDPFLNSGTYHSRDESTDSGLSMSSYSVPRTPDDFLNSVDEME

TNDSLGPASMVTQPNRFPDYLDAMPGTDVDLGTLEGESMAVEGEELMPSLQEALSSDILNDMESVLAATKIDKES  
FLTWL PMRMRKLPDSFFKPP

rs:XP\_004610324 [XP\_004610324] PREDICTED: protein **FAM181A** [Sorex  
araneus]. 113..127

MASDSDVKMLLNFNVLASSDIKAALDKSAPCRRSVDHRKYLQKQLKRFSQKCSRLPRGLPGRGAEP  
RGPDDRPGKPPPEGSPGGGAEGGGSGEETPGRDPDAAQPGQVPMRKRQLPASFWEEP  
RPTHGYPGGPAGPPYEG  
KKPRQALEPLGPAAPRLQAHKELLRMPGVALAGRAGAWTCCPFQHHGQPIYPGPPGALPASPLPSLGLWRKSP  
PGELAHFRKDVDPGPKVHRPVVVKPIPTKPAVAPPLFNVFGYL PMRKRQLPASFWEEP

rs:XP\_004584374 [XP\_004584374] PREDICTED: protein **FAM181A** [Ochotona  
princeps]. 130..144

MASDSDVKMLLNFNVLASSDIKAALDKSAPCRRSVDHRKYLQKQLKRFSQKYSRLPRGLPGRAAAE  
PHL  
RRGSEDRPGRLLLDSCPDSSPSGGGSCKEKGLGNAVPRECLSQEQTLOGQDPEAARPGQVPMRKRQLPAS  
FWEEP  
RPTHSYPMGLEGLGPRQGGPYEGKKTCKGLEPLGPETTLGPLSPRVLAEKELLKMPGVPLVGRVNAW  
SCCFQY  
HGQPIYPGPPGLLPLGPVPSLGLWQKSPACPGELSHFCKDVGDLGQKVYRPPVVKPIPTKPA  
MPPPIFNVFGYL  
PMRKRQLPASFWEEP

rs:XP\_012782383 [XP\_012782383] PREDICTED: transcriptional coactivator  
YAP1 isoform X1 [Ochotona princeps]. 86..100

MDPAQQQPPPPQAPQGGQPPAQPQGGQPPSGPGQPTQASQAAPQAPPAGHQIVHVRGDSETDLEAL  
FNAVMNPKTANVPQTVPMRLRKLKLPDSFFKPPPEPKSHSRQASTDAGTAGVLTQHVRAHSSPASLQ  
LGAVTPGTLT  
PTGVVSGPAATPTAQHLQSSSFEIPDDVPLPAGWEMAKTSSGQRYFLNHIDQTTTWQDPRKAMLS  
QMNVPA  
PAPTSP  
PVQQNMMNSASGPLPDGWEQAMTQDGEIYYINHKNKTTSWLDPRLDPRFAMNQRI  
SQSAPVKQPPPLAPQSPQGG  
VLGSGSSNQQQMRLQQLQMEKERLRLKQOELLRQVRPQAMRNINPSTANSPKCQELALRSQ  
LPTLEQDGGTQNP  
VSSPGMSQELRTMTTNSD  
PFLNSGTYHSRDESTDSGLSMSSYSVPRT  
PDDFLNSVDEMDTGDTINQSTLPSQQN  
RFPDYLEAIPGTNVDLGTLEGDGMNIEGEELMPSLQEALSSDILNDMESVLAATKLDKESFLT  
WL  
PMRLRKLKLPDSFFKPP

rs:XP\_004585064 [XP\_004585064] PREDICTED: transcriptional coactivator  
YAP1 isoform X2 [Ochotona princeps]. 86..100

MDPAQQQPPPPQAPQGGQPPAQPQGGQPPSGPGQPTQASQAAPQAPPAGHQIVHVRGDSETDLEAL  
FNAVMNPKTANVPQTVPMRLRKLKLPDSFFKPPPEPKSHSRQASTDAGTAGVLTQHVRAHSSPASLQ  
LGAVTPGTLT  
PTGVVSGPAATPTAQHLQSSSFEIPDDVPLPAGWEMAKTSSGQRYFLNHIDQTTTWQDPRKAMLS  
QMNVPA  
PAPTSP  
PVQQNMMNSASGPLPDGWEQAMTQDGEIYYINHKNKTTSWLDPRLDPRFAMNQRI  
SQSAPVKQPPPLAPQSPQGG  
VLGSGSSNQQQMRLQQLQMEKERLRLKQOELLRQAMRNINPSTANSPKCQELALRSQ  
LPTLEQDGGTQNPVSSP  
GMSQELRTMTTNSD  
PFLNSGTYHSRDESTDSGLSMSSYSVPRT  
PDDFLNSVDEMDTGDTINQSTLPSQQNRFPD  
YLEAIPGTNVDLGTLEGDGMNIEGEELMPSLQEALSSDILNDMESVLAATKLDKESFLT  
WL  
PMRLRKLKLPDSFFKPP

rs:XP\_012782384 [XP\_012782384] PREDICTED: transcriptional coactivator  
YAP1 isoform X3 [Ochotona princeps]. 86..100

MDPAQQQPPPPQAPQGGQPPAQPQGGQPPSGPGQPTQASQAAPQAPPAGHQIVHVRGDSETDLEAL  
FNAVMNPKTANVPQTVPMRLRKLKLPDSFFKPPPEPKSHSRQASTDAGTAGVLTQHVRAHSSPASLQ  
LGAVTPGTLT  
PTGVVSGPAATPTAQHLQSSSFEIPDDVPLPAGWEMAKTSSGQRYFLNHIDQTTTWQDPRKAMLS  
QMNVPA  
PAPTSP  
PVQQNMMNSASGPLPDGWEQAMTQDGEIYYINHKNKTTSWLDPRLDPRFAMNQRI  
SQSAPVKQPPPLAPQSPQGG  
VLGSGSSNQQQMRLQQLQMEKERLRLKQOELLRQVRPQELALRSQ  
LPTLEQDGGTQNPVSSP  
GMSQELRTMTTNSD  
PFLNSGTYHSRDESTDSGLSMSSYSVPRT  
PDDFLNSVDEMDTGDTINQSTLPSQQNRFPDYLEAIPGTNVDL  
GTLEGDGMNIEGEELMPSLQEALSSDILNDMESVLAATKLDKESFLT  
WL PMRRLKLPDSFFKPP

rs:XP\_004585065 [XP\_004585065] PREDICTED: transcriptional coactivator  
YAP1 isoform X4 [Ochotona princeps]. 86..100

MDPAQQQPPPPQAPQGGQPPAQPQGGQPPSGPGQPTQASQAAPQAPPAGHQIVHVRGDSETDLEAL  
FNAVMNPKTANVPQTVPMRLRKLKLPDSFFKPPPEPKSHSRQASTDAGTAGVLTQHVRAHSSPASLQ  
LGAVTPGTLT  
PTGVVSGPAATPTAQHLQSSSFEIPDDVPLPAGWEMAKTSSGQRYFLNHIDQTTTWQDPRKAMLS  
QMNVPA  
PAPTSP  
PVQQNMMNSASGPLPDGWEQAMTQDGEIYYINHKNKTTSWLDPRLDPRFAMNQRI  
SQSAPVKQPPPLAPQSPQGG  
VLGSGSSNQQQMRLQQLQMEKERLRLKQOELLRQELALRSQ  
LPTLEQDGGTQNPVSSP  
GMSQELRTMTTNSD  
PFLNSGTYHSRDESTDSGLSMSSYSVPRT  
PDDFLNSVDEMDTGDTINQSTLPSQQNRFPDYLEAIPGTNVDLGTLE  
GDGMNIEGEELMPSLQEALSSDILNDMESVLAATKLDKESFLT  
WL PMRRLKLPDSFFKPP

rs:XP\_012782385 [XP\_012782385] PREDICTED: transcriptional coactivator  
YAP1 isoform X5 [Ochotona princeps]. 86..100

MDPAQQQPPPPQAPQGGQPPAQQPPQGGQPPSGPGQPTPQASQAAPQAPPAGHQIVHVRGDSETDLEAL  
FNAVMNPKTANVPQTVPMRLRKLKLPDSFFKPPPEPKSHSRQASTDAGTAGVLTPOHVRAHSSPASLQLGAVTPGTLT  
PTGVVSGPAATPTAQHLQSSFEIPDDVPLPAGWEMAKTSSGQRYFLNHIDQTTTWQDPRKAMLSQMNVPAPTSP  
PVQQNMMNSASAMNQRISQSAPVKQPPPLAPQSPQGGVVGSGSSNQQQMRLQQLQMEKERLRLKQQEELLRQVRP  
QAMRNINPSTANSPKCQELALRSQLPTLEQDGGTQNPVSSPGMSQELRTMTTNSSDPFLNSGTYHSRDESTDSGL  
SMSSYSVPRTPDDFLNSVDEMDTGDTINQSTLPSQQNRFPDYLEAIPGTNVDLGTLEGDGMNIEGEEELMPSLQEA  
LSSDILNDMESVLAATKLDKESFLTWL PMRLRKLKLPDSFFKPP

rs:XP\_004585066 [XP\_004585066] PREDICTED: transcriptional coactivator  
YAP1 isoform X6 [Ochotona princeps]. 86..100

MDPAQQQPPPPQAPQGGQPPAQQPPQGGQPPSGPGQPTPQASQAAPQAPPAGHQIVHVRGDSETDLEAL  
FNAVMNPKTANVPQTVPMRLRKLKLPDSFFKPPPEPKSHSRQASTDAGTAGVLTPOHVRAHSSPASLQLGAVTPGTLT  
PTGVVSGPAATPTAQHLQSSFEIPDDVPLPAGWEMAKTSSGQRYFLNHIDQTTTWQDPRKAMLSQMNVPAPTSP  
PVQQNMMNSASAMNQRISQSAPVKQPPPLAPQSPQGGVVGSGSSNQQQMRLQQLQMEKERLRLKQQEELLRQAMR  
NINPSTANSPKCQELALRSQLPTLEQDGGTQNPVSSPGMSQELRTMTTNSSDPFLNSGTYHSRDESTDSGLSMSS  
YSVPRTPDDFLNSVDEMDTGDTINQSTLPSQQNRFPDYLEAIPGTNVDLGTLEGDGMNIEGEEELMPSLQEA  
LSSDILNDMESVLAATKLDKESFLTWL PMRLRKLKLPDSFFKPP

rs:XP\_004585067 [XP\_004585067] PREDICTED: transcriptional coactivator  
YAP1 isoform X7 [Ochotona princeps]. 86..100

MDPAQQQPPPPQAPQGGQPPAQQPPQGGQPPSGPGQPTPQASQAAPQAPPAGHQIVHVRGDSETDLEAL  
FNAVMNPKTANVPQTVPMRLRKLKLPDSFFKPPPEPKSHSRQASTDAGTAGVLTPOHVRAHSSPASLQLGAVTPGTLT  
PTGVVSGPAATPTAQHLQSSFEIPDDVPLPAGWEMAKTSSGQRYFLNHIDQTTTWQDPRKAMLSQMNVPAPTSP  
PVQQNMMNSASAMNQRISQSAPVKQPPPLAPQSPQGGVVGSGSSNQQQMRLQQLQMEKERLRLKQQEELLRQVRP  
QELALRSQLPTLEQDGGTQNPVSSPGMSQELRTMTTNSSDPFLNSGTYHSRDESTDSGLSMSSYSVPRTPDDFLN  
SVDEMDTGDTINQSTLPSQQNRFPDYLEAIPGTNVDLGTLEGDGMNIEGEEELMPSLQEA  
LSSDILNDMESVLAATKLDKESFLTWL PMRLRKLKLPDSFFKPP

rs:XP\_004585068 [XP\_004585068] PREDICTED: transcriptional coactivator  
YAP1 isoform X8 [Ochotona princeps]. 86..100

MDPAQQQPPPPQAPQGGQPPAQQPPQGGQPPSGPGQPTPQASQAAPQAPPAGHQIVHVRGDSETDLEAL  
FNAVMNPKTANVPQTVPMRLRKLKLPDSFFKPPPEPKSHSRQASTDAGTAGVLTPOHVRAHSSPASLQLGAVTPGTLT  
PTGVVSGPAATPTAQHLQSSFEIPDDVPLPAGWEMAKTSSGQRYFLNHIDQTTTWQDPRKAMLSQMNVPAPTSP  
PVQQNMMNSASAMNQRISQSAPVKQPPPLAPQSPQGGVVGSGSSNQQQMRLQQLQMEKERLRLKQQEELLRQELA  
LRSQLPTLEQDGGTQNPVSSPGMSQELRTMTTNSSDPFLNSGTYHSRDESTDSGLSMSSYSVPRTPDDFLNSVDE  
MDTGDTINQSTLPSQQNRFPDYLEAIPGTNVDLGTLEGDGMNIEGEEELMPSLQEA  
LSSDILNDMESVLAATKLDKESFLTWL PMRLRKLKLPDSFFKPP

rs:XP\_004589899 [XP\_004589899] PREDICTED: protein **FAM181B** [Ochotona  
princeps]. 219..233

MAVQAALLSSHFPVFPFGFGGSPDGLGGTFGVLDKCCFEDDETGTPAGALLSGAEGGDVREATRDLLSF  
IDSASSNIKLALDKPGKSKRKNVNRKYLQKQIKRCSGLMGTAPPSPSAADTPAKRPPGAPTVAAPAHGKAAP  
RREASQAAAAASLQSRSLAALFDSL RHVPGAAEPAGGAVASVAAAGLSGAGAAGNGEDAAGPVGTVVPGSRKVP  
LRARNLPLSFFTEPSRAGGGSGGCGPSTPGVSLGDLEKGAEEAEFFELLGPDYGAAGTEAGVLLAAEPLDVFPSA  
GAVLRATPELEPGLFEPFPAMVGSLLYPETWSAPGCPQTKKPALAAPRGGLTLNEPLHPLYAAATDSPAEDGSG  
HLASFAPFFPDCALPPPAPHPVSYDYSAGYSRSTYSSLWRPDGGWEGAPGEEGARRD PLRARNLPLSFFTEP

rs:NP\_001296578 [NP\_001296578] transcriptional coactivator YAP1-like  
[Hydra vulgaris].>tr:A0A089Q509\_HYDVU [A0A089Q509] SubName: Full=YAP  
{ECO:0000313|EMBL:AI07404.1};>gp:KM065534\_1 [KM065534] YAP [Hydra  
vulgaris] 43..57

MDMNSTQRQGNFVLHVRQDSDTDLQFLKNSVSTNKDIPRSKPFDRKLPASFFRPPPSLETQTAPIH  
TRARSLPSNIGQIAQDQVILQQQQHQPNFLTPSHQRTQSYGTLESNYLPSGCEMRTTASGQKYIINHQN  
QSTSWQDPRKAQSMTVLPANPQNLLMDDLPEGWERAVTAEGEVYFINHQTKTTSWFDPRLNRPNNNLLGGTNIQ  
YYQQEKRRHQQIQNQLLREFLIHQRMNGQHTDSVLNNSLNNLVREKYTAHMNSSVLGRGSSVDSGLDGMES  
YLTFTSTDGLNDMDTADVDRNNQFDKNTSMEQGICFNNRLEFFDLSLQASNVLDLILEDGFELSSDLEAINTAL  
NDVDMILSPNNKPNAYMTWL PFRDRKLPASFFRPP



rs:XP\_008819911 [XP\_008819911] PREDICTED: protein **FAM181A** [Nannospalax galili]. 129..143

MAADSDVKMLLNFNVLASSDIKAALDKSAPCRRSVDHRKYLQKQLKRFSQKYSRLPRGLPGRATETHLQ  
RGPEDRPGRLPLHPCPHSSPGGGGSCKEKALGTFPGEELSKESQSLQGLSPEAARPGQVPMRKRQLPASFWEEP  
PTLSYPMGLEVLGAREASLYESKKSCKGLESLGPETAPLPMSPRALADKEPLKMPGISLVGSLDAWGYPFQYH  
GQPIFSGPLPGVLPQGPVPSLGLWRKNPASPGELAHFCKDVGPGPKVYRPVVLKPIPTKPAMPPPIFNVFGYL  
PMRKRQLPASFWEEP

rs:XP\_018361461 [XP\_018361461] PREDICTED: transcriptional coactivator YAP1 [Trachymyrmex cornetzi]. 46..60

MALNQDVDQLSKSNPVVRVDQNSESDLQALFDTVLKPDSCRPLQVPLRLRNLNLPDSFFNPPSTGSKSPSI  
SHSRENSADSAFGAAVAVPATPNGGGGGGGGKQRSYDVISTVDDLGLPLPHGWEQARTPEGQIYFLNHLTRTTTWEDP  
RKATAAASVAAVAAVAVESSKSNALGPLPDGWEQARTAEGEIIYFINHQTRTTTSWFDPRIPSHLQRTTPASGAMPLPQN  
WQLQQPTGIQSNQNLQACQKQKIRLQSLQLERERLQQRQOEIMRQVGIQQEMMLRQSTTDAVMDPFLSGINEHAR  
QESADSGGLGSAISLPQASDDFLNIDENMDGTSDDGAPMDTPDLSTLSDNIDSTDDLLPSLQLNNEEFSTDILDD  
VQSLINPNTTKPENVTWL PLRLRNLNLPDSFFNPP

rs:XP\_018349476 [XP\_018349476] PREDICTED: transcriptional coactivator YAP1 [Trachymyrmex septentrionalis]. 46..60

MALNQDVDQLSKSNPVVRVDQNSESDLQALFDTVLKPDSCRPLQVPLRLRNLNLPDSFFNPPSTGSKSPSI  
SHSRENSADSAFGAAAAAAGLTVSHPRAHSSPASLQOQTYASAAQAPQHAPQPHARHHHQQKQRSYDVISTVDDL  
PLPHGWEQARTPEGQIYFLNHLTRTTTWEDPRKATAAASVAAVAAVAVESSKSNALGPLPDGWEQARTAEGEIIYFI  
NHQTRTTTSWFDPRIPSHLQRTTPASGAMPLPQNWQLQQPAGIQSNQNLQACQKQKIRLQSLQLERERLQQRQOEIMR  
QVGIQQEMMLRQSTTDAVMDPFLSGINEQHARQESADSGGLGSAISLPQASDDFLNIDENMDSTSERHCALNDL  
TKRLYRSHKYINGGTPEPDLSTLSDNIDSTDDLLPSLQLNNEEFSTDILDDVQSLINPNTTKPENVTWL  
PLRLRNLNLPDSFFNPP

rs:XP\_018545515 [XP\_018545515] PREDICTED: protein **FAM181A** [Lates calcarifer]. 104..118

MANADSEVKTLNLFVNLASSDIKAALDKSAPCRRSVDHRKYLQKQLKRFSQKYSRVPRCHTHRPAEYGC  
GRPVGAVHQSVKVAEKANSDAQDVGNVGSAVEQVPMRKRQLPASFWEEPKLTQTRREHAHFGLKRSPPAGTSEGG  
ENEKRKRSYGDADKATLSASGRSSADKEALKLDLTSHHCVSVCGCCPFQYHGHQVLHSHIVVPHPLGLWSKAA  
GTETERPEHPYQKIHITHVVVKPIPTKPTVQSPIFSVFGFI PMRKRQLPASFWEEP

rs:XP\_018546894 [XP\_018546894] PREDICTED: transcriptional coactivator YAP1-like isoform X1 [Lates calcarifer]. 47..61

MDTHRGGAPPAGQQVVHVRGDSQTELEALFSAVMNPSKATRQPASLPMRMRKLPDSFFRQPDPRGHSRQ  
ASSDGGVCGSLTPHHVRAHSSPASLPVNSLSTQAADVAATPIIPDDVPLPHGWEMAKTPTGQRYFLNHLDKTTTW  
HDPRLSQLQSAAAQHPPIPGAPVHSHSLSNPAPTTQPQNI SPETGPLPEGWEQAVTADGEVYYIDHINKTTTWVDP  
RLAQKMNPGILGLAMQQRQEKERLRCKQGLPQQITPQEAGGRNQMDHDRNAQTLVPSLDVIRIRASNHEPTLNGAH  
SRNESTDSGLSVSSLPRTSDHMLSSVDHMDTGDSGEPSSMTLQESMPVLPMSENEELMPCIEGLSSDLLMDMET  
VLSGSHMDRDSLTLTWL PMRMRKLPDSFFRQP

rs:XP\_018546895 [XP\_018546895] PREDICTED: transcriptional coactivator YAP1-like isoform X2 [Lates calcarifer]. 47..61

MDTHRGGAPPAGQQVVHVRGDSQTELEALFSAVMNPSKATRQPASLPMRMRKLPDSFFRQPDPRGHSRQ  
ASSDGGVCGSLTPHHVRAHSSPASLPVNSLSTQAADVAATPIIPDDVPLPHGWEMAKTPTGQRYFLNHLDKTTTW  
HDPRLSQLQSAAAQHPPIPGAPVHSHSLSNPAPTTQPQNI SPETAQKMNPGILGLAMQQRQEKERLRCKQGLPQQI  
TPQEAGGRNQMDHDRNAQTLVPSLDVIRIRASNHEPTLNGAHSRNESTDSGLSVSSLPRTSDHMLSSVDHMDTGDS  
GEPSSMTLQESMPVLPMSENEELMPCIEGLSSDLLMDMETVLSGSHMDRDSLTLTWL PMRMRKLPDSFFRQP

rs:XP\_018520940 [XP\_018520940] PREDICTED: LOW QUALITY PROTEIN: protein **FAM181B** [Lates calcarifer]. 246..260

MQVVGHKQRVKXPGVPLPLLFDVLTSLVQPPVRSPCXSSEPVTSTLECLQELHEQHQQDQVQVVRGKKTCS  
EETFGSRIAADATGVAAGLNRMVAVQTAIMNPQFMNFCFPGSVMEYDVEKSLDGSLGAEENDEYKETTRDLLS  
FIDSASSNIKLALDKPVKSKRKVNHRKYLQKQIKRGTGIITPGNVGEAPVKRQGSPPVQSPPLQSKTLPKRDGVQ  
ANLQSKSLAALFSPVKDIRGEKAKKPLRHRNLPPSFFTEPANCSKVSSTSGMTLKDRLERGNPEAADFFELLGPD  
YSNMVSDQDLYQSMPLRVQPEMGGPDASYDAHHLVGGLLYSEPWTS CSGSPSKKLGESLRTGPAQPPVYCHSEAA  
TGPIEDNALCTLAFPNFFTTDCSIPQVTTYDLSSGYNRANYSSL PLRHRNLPPSFFTEP

rs:XP\_018521078 [XP\_018521078] PREDICTED: transcriptional coactivator YAP1 [Lates calcarifer]. 45..59

MDPSQHNPPAGHQIVHVRGDSETDLEALFNAMNPKSTIVPPSVPMRMRKLPDSFFKPPPEPKSHSRQAS  
TDAGSGGALTPHHVRAHSSPASLQLGAVSGGSLSGMGSAGASPOHLRQSSYEIPDDMPLPPGWEMAKTASGQRYF  
LNHIDQTTTWDPRKALLQMNQAAPPSSVPVQQQNMNPNASGPLPEGWEQAITSEGEIYYINHKNKTTSWLDPRL  
DQRYALNQQRISQSGPVKQGGQLPPSTHSGVMGGNNQMRLOQIEKERLRLKQOELLRQRPQELALRNQLPTSMQD  
DGSTNPVSSPMAQDARTMTANSSDPFLNSGTYHSRDESTDSGLSMSSYSVPRTPDFFLNSVDEMDTGDPLPPSMA  
TQPSRFPDYLDIAPGTDVLDLGTLEGESMAVEGEELMPSLQEQALSSDILNDMESVLAATKIDKESFLTWL  
PMRMRKLPDSFFKPP

rs:XP\_005090902 [XP\_005090902] PREDICTED: transcriptional coactivator YAP1-like isoform X1 [Aplysia californica]. 41..55

MSQDRTGPIVHVRENSDTELEALFNIAMNPQLASETNKSVPLMRNLPASFFRPPPEPKQNMQQMGVN  
ASKDGHSPADAPVFGAVNSSVNIAMRAHSSPASLQQLNSAAPPPPTSHVRQHSYDLLDEQPLPAGWDMAKTP  
QGQRYLNLHVLIQITWINDPRKTHTPGTTAPSGSSNNNNNNNTSNLNSSPQTGSPAPSSQPAPNSTPVNVKVP  
PPGWERAFADCEVYFINHIDRTTSWFHPSIPVHLQRPGMKFQQQQQQQQQQQQQQQLSSGPISPQQEQQLKHLKI  
QQLQMEQELLKKRQDEIARQEMALRAQVNNMGTSGGDVTAISQSSEMTSVADPFFGQTTTSDHHRQESGDSGLG  
GMGTSYSLPRTPDFFLGNMEDMDTGDGGPKLTGQADFSSMDLAGVNDVGDHLNMDSEDLVPSLQEEIASDLLKDV  
ETVLGNKDNPLTWL PLMRNLPASFFRPP

rs:XP\_005090903 [XP\_005090903] PREDICTED: transcriptional coactivator YAP1-like isoform X2 [Aplysia californica]. 41..55

MSQDRTGPIVHVRENSDTELEALFNIAMNPQLASETNKSVPLMRNLPASFFRPPPEPKQNMQQMGVN  
ASKDGHSPADAPVFGAVNSSVNIAMRAHSSPASLQQLNSAAPPPPTSHVRQHSYDLLDEQPLPAGWDMAKTP  
QGQRYLNLHVLIQITWINDPRKTHTPGTTAPSGSSNNNNNNNTSNLNSSPQTGSPAPSSQPAPNSTPVNVKVP  
PPGWERAFADCEVYFINHIDRTTSWFHPSIPVHLQRPGMKFQQQQQQQQQQQQQQQLSSGPISPQQEQQLKHLKI  
QQLQMEQELLKKRQDEIARQMALRAQVNNMGTSGGDVTAISQSSEMTSVADPFFGQTTTSDHHRQESGDSGLGG  
MGTSYSLPRTPDFFLGNMEDMDTGDGGPKLTGQADFSSMDLAGVNDVGDHLNMDSEDLVPSLQEEIASDLLKDV  
TVLGNKDNPLTWL PLMRNLPASFFRPP

rs:XP\_012944291 [XP\_012944291] PREDICTED: uncharacterized protein DDB\_G0271670-like [Aplysia californica]. 359..373

MASTRPYTFQPQPPLPRTTGGKRGSPGINIASSSSEDESDQSITDFSPVPVSRLSVTDLASGPSTK  
SNAVITVSSLSPRNNFVTKKSTGLLPSRSLSNASHVISGSFNHSSGSSSCSSGNSLFGSNTISSNGINVAN  
HGAIGQSVTTTTTTPINNANSSTSSSLPPAVPGPLTIQAHSTLNNKTSFAFTTQNSLTSNATNSTASSITCGNN  
AGGSSSSSSDNGNATNSANTGSLVAATTSSSASSPSSRTCSVPEAASTSPRERSCSPANFAYEHDHDYENVASP  
CSSTASGPTYVRPPGFNHHAQEITVSSKNKLKKKSSAAFI SVRDGFKKREATPPKIKPKREPLPMKLRALPQSF  
WQQPNVAHQVSPATLFPILPPLSQKESEEIMDVPRVTPPEDRDSKKAPPPERKLTVANITLLFKLFDGVTEKK  
STGTSKSRTHTRQRKTVPKSSTKGLFLGNDPYLVEDVTDKIFPTLTLEGSRHLSGGGNTSLQLITLKEGDRVTLL  
PSSLSMEQSYQMLSELVMHI PMKLRALPQSFVQQP

rs:XP\_005149577 [XP\_005149577] PREDICTED: protein **FAM181A** [Melopsittacus undulatus]. 127..141

MASDSEVKLLNFVNLASSDIKAALDKSAPCRRSVDHRKYLQKQLKRFSQKYSRIPRCHPSKSTECGWR  
RGAEDLGRGPPPEAPDPSARGAAATERVLQTAGVEGSLTEERVLQEQNPEATRDPQVPMRKRQLPASFWEEPQPA  
QSLARAYPTSSEGLPAPRDPSPSEGGKSKRSPNTSGPESPEPTPHAGDKDSAGILLGRVGAWTCCPFPCPGPG  
VYQPPGTLSPFLGLGLWRKSAATLSAEVPHFCKEADGMEQKLYRPVVLKPIPTKPAVPPPIFNVFSYL  
PMRKRQLPASFWEEP

rs:XP\_006278984 [XP\_006278984] PREDICTED: protein **FAM181A** [Alligator mississippiensis].>tr:A0A151P8Q3\_ALLMI [A0A151P8Q3] SubName: Full=Protein **FAM181A** {ECO:0000313|EMBL:KYO45477.1}; 126..140

MASDSEVKMLNFVNLASSDIKAALDKSAPCRRSVDHRKYLQKQLKRFSQKYSRIPRSHPSKSMESNMK  
RGVEDRNRSSHPDALDPNCRATSEKALRGAEVEENLSGEQGLQEQSPESARPDQVPMRKRQLPASFWEEP  
SLMVGSPAGLDGLPKSRDLPSYEGKSKKSPDATGPESPPVPVQPSGEKEPIKVPGTSLSGRMNAWSCCPFYH  
GQPVYQTPGALPQSPFPLGLWRKNTAPQGEIQHFCKETDATGQKLYRPVVLKPIPTKPAVPPPIFNVFGYI  
PMRKRQLPASFWEEP

rs:XP\_019337569 [XP\_019337569] PREDICTED: transcriptional coactivator  
YAP1 isoform X1 [Alligator mississippiensis]. 13..27

MNPKGANVPHTLPMRLRKLKLPDSFFKPPPEPKAHSRQASTDAGSAGALTPQHVAHSSPASLQLGAVSPGT  
LTPSGVVTGPGPASSSQHLRQSSFEIPDDVPLPPGWEMAKTPSGQRYFLNHIDQTTTWQDPRKAMLSQMNVTAPT  
SPPVQPNIMNSASGPLPDGWEQAMTQDGEIYYINHKNKTTSWLDPRLDPRFAMNPRITQSAPVKQPPSLAPQSPQ  
GGVMGSGNSNQQQMRLQQLQMEKERLRLKHQELLRQVRPQALRNINPSTANSPKHQELALRSQLPTMEQDSGSQ  
NPVSSPGMSQELRTMTTNSDDPFLNSGTYHSRDESTDSGLSMSSYSVPRTPDFFLNSVDEMDTGDSISQSNIPSH  
QNRFPDYLEAIPGTNVDLGTLEGDGMNIEGELMPSLQEQALSSDILNDMESVLAATKLDKESFLTWL  
PMRLRKLKLPDSFFKPP

rs:XP\_019337570 [XP\_019337570] PREDICTED: transcriptional coactivator  
YAP1 isoform X2 [Alligator mississippiensis].>tr:A0A151P7G7\_ALLMI  
[A0A151P7G7] SubName: Full=Transcriptional coactivator YAP1 isoform D  
{ECO:0000313|EMBL:KYO44972.1}; 13..27

MNPKGANVPHTLPMRLRKLKLPDSFFKPPPEPKAHSRQASTDAGSAGALTPQHVAHSSPASLQLGAVSPGT  
LTPSGVVTGPGPASSSQHLRQSSFEIPDDVPLPPGWEMAKTPSGQRYFLNHIDQTTTWQDPRKAMLSQMNVTAPT  
SPPVQPNIMNSASGPLPDGWEQAMTQDGEIYYINHKNKTTSWLDPRLDPRFAMNPRITQSAPVKQPPSLAPQSPQ  
GGVMGSGNSNQQQMRLQQLQMEKERLRLKHQELLRQVRPQELALRSQLPTMEQDSGSQNPVSSPGMSQELRTMT  
TNSDDPFLNSGTYHSRDESTDSGLSMSSYSVPRTPDFFLNSVDEMDTGDSISQSNIPSHQNRFPDYLEAIPGTN  
VDLGTLEGDGMNIEGELMPSLQEQALSSDILNDMESVLAATKLDKESFLTWL PMRLRKLKLPDSFFKPP

rs:XP\_019337571 [XP\_019337571] PREDICTED: transcriptional coactivator  
YAP1 isoform X3 [Alligator mississippiensis]. 13..27

MNPKGANVPHTLPMRLRKLKLPDSFFKPPPEPKAHSRQASTDAGSAGALTPQHVAHSSPASLQLGAVSPGT  
LTPSGVVTGPGPASSSQHLRQSSFEIPDDVPLPPGWEMAKTPSGQRYFLNHIDQTTTWQDPRKAMLSQMNVTAPT  
SPPVQPNIMNSASAMNPRITQSAPVKQPPSLAPQSPQGGVMGSGNSNQQQMRLQQLQMEKERLRLKHQELLRQV  
RPQALRNINPSTANSPKHQELALRSQLPTMEQDSGSQNPVSSPGMSQELRTMTTNSDDPFLNSGTYHSRDESTDS  
GLSMSSYSVPRTPDFFLNSVDEMDTGDSISQSNIPSHQNRFPDYLEAIPGTNVDLGTLEGDGMNIEGELMPSLQ  
EALSSDILNDMESVLAATKLDKESFLTWL PMRLRKLKLPDSFFKPP

rs:XP\_014456178 [XP\_014456178] PREDICTED: transcriptional coactivator  
YAP1 isoform X4 [Alligator mississippiensis].>tr:A0A151P7B6\_ALLMI  
[A0A151P7B6] SubName: Full=Transcriptional coactivator YAP1 isoform C  
{ECO:0000313|EMBL:KYO44971.1}; 13..27

MNPKGANVPHTLPMRLRKLKLPDSFFKPPPEPKAHSRQASTDAGSAGALTPQHVAHSSPASLQLGAVSPGT  
LTPSGVVTGPGPASSSQHLRQSSFEIPDDVPLPPGWEMAKTPSGQRYFLNHIDQTTTWQDPRKAMLSQMNVTAPT  
SPPVQPNIMNSASGPLPDGWEQAMTQDGEIYYINHKNKTTSWLDPRLDPRFAMNPRITQSAPVKQPPSLAPQSPQ  
GGVMGSGNSNQQQMRLQQLQMEKERLRLKHQELLRQELALRSQLPTMEQDSGSQNPVSSPGMSQELRTMTTNS  
DPFLNSGTYHSRDESTDSGLSMSSYSVPRTPDFFLNSVDEMDTGDSISQSNIPSHQNRFPDYLEAIPGTNVDLGT  
LEGDGMNIEGELMPSLQEQALSSDILNDMESVLAATKLDKESFLTWL PMRLRKLKLPDSFFKPP

rs:XP\_014457652 [XP\_014457652] PREDICTED: uncharacterized protein  
LOC106737997 [Alligator mississippiensis].>rs:XP\_019345533 [XP\_019345533]  
PREDICTED: uncharacterized protein LOC106737997 [Alligator  
mississippiensis].>rs:XP\_014457655 [XP\_014457655] PREDICTED:  
uncharacterized protein LOC106737997 [Alligator mississippiensis].  
214..228

MAAGVIRNPAEFRLPTSFQHSFLHPAVHQDRDFQELSEEEEEEEEEEEEEEEEEEEEEVEVESQGSPTAPIPGG  
ERQEVATATASLHDAEMTLQLLRFSELISSDIQRYFGRKDKKEEDPDSCNIYEDCFSPQRSGRELYYADLMHIAQSG  
ELDDEDSHSAQVPLGQLDQQVWRSICNKDGGQKLGPLAELFEYGLRQYIKQTVSDSRRLRLEKKYAHITPMHRRK  
LPPSFWKEPSPGAGILNTNTPDFSDLLANWTVEPGQELPNASRELAGELGQRQAMEADQFNVL  
PMHRRKLPPSFWKEP

rs:XP\_013032975 [XP\_013032975] PREDICTED: protein **FAM181A**, partial [Anser  
cygnoides domesticus]. 115..129

FVNLISSDIKAALDKSAPCRRSVDHRKYLQKQLKRFSQKYSRVPRCHPGKPSSECGPRRGAEDRARGCQS  
EMPDPGPHSGAAAEKALRAAEAEESLAGERALPEQNPEAGRPDQVPMRKRQLPASFWEEPRAQSLPSRGFPPGP  
EGLSAPRDTPSFEGKSKRSQDTAGPESPSEPALHTGEKDPAGVLSGRVGTWTCCPFPCPGPAVYQPPGTLPPSP  
FPGLGLWRKSAATLPAEAQPFCKEAEAGQKFYRPVVLKPIPTKPAVPPPIFNVFVGYL PMRKRQLPASFWEEP

rs:XP\_013134895 [XP\_013134895] PREDICTED: transcriptional coactivator  
YAP1 isoform X1 [Papilio polytes]. 44..58

MALNSDSEQKSNLVLVRVDQSDSVLQSLFDTVLKPDSCRPLQVPLRMRQLPKSFFNPPSTGSKSPSVSH  
SRENSADSAFGSSSATGAAPVSHSRAHSSPASLQQTYAAGQQTQQAPLHHQHSHKQORSYDVGTHMQDDLGLPLPSGW  
EQARTPEGQIYYLNHITKTTTWEDPRKTLAAQSAETMLAQATAPQTIAPATPTAAKSTSSSTASDPLGLPLDGWE  
QAATPEGEVYFINHAARTTSWFDPRIPQHLQRTPVAGAGAAGGGWANASLQACQQKLRQLQSLQMERERLKQRQQE  
IMLQQELMGRQSSSIVSSLASGGAGAAGVPGAGGGAAADLDPFLSGLTEHQREQESADSGLGMVNPSSYMPHTPE  
DFLAGMDDRMDCSEAGAIKDPDISLGDNIDPTDDLVPVSLQLSEFTNDILLDDVQSLINSTPSKTDNVLTWL  
PLRMRQLPKSFFNPP

rs:XP\_013134896 [XP\_013134896] PREDICTED: transcriptional coactivator  
YAP1 isoform X2 [Papilio polytes]. 44..58

MALNSDSEQKSNLVLVRVDQSDSVLQSLFDTVLKPDSCRPLQVPLRMRQLPKSFFNPPSTGSKSPSVSH  
SRENSADSAFGSSSATGAAPVSHSRAHSSPASLQQTYAAGQQTQQAPLHHQHSHKQORSYDVGTHMQDDLGLPLPSGW  
EQARTPEGQIYYLNHITKTTTWEDPRKTLAAQSAETMLAQATAPQTIAPATPTAAKSTSSSTASDPLGLPLDGWEQ  
AATPEGEVYFINHAARTTSWFDPRIPQHLQRTPVAGAGAAGGGWANASLQACQQKLRQLQSLQMERERLKQRQQE  
IMLQQELMGRQSSSIVSSLASGGAGAAGVPGAGGGAAADLDPFLSGLTEHQREQESADSGLGMVNPSSYMPHTPE  
FLAGMDDRMDCSEAGAIKDPDISLGDNIDPTDDLVPVSLQLSEFTNDILLDDVQSLINSTPSKTDNVLTWL  
PLRMRQLPKSFFNPP

rs:XP\_013134897 [XP\_013134897] PREDICTED: transcriptional coactivator  
yorkie isoform X3 [Papilio polytes]. 44..58

MALNSDSEQKSNLVLVRVDQSDSVLQSLFDTVLKPDSCRPLQVPLRMRQLPKSFFNPPSTGSKSPSVSH  
SRENSADSAFGSSSATGAAPVSHSRAHSSPASLQQTYAAGQQTQQAPLHHQHSHKQORSYDVGTHMQDDLGLPLPSGW  
EQARTPEGQIYYLNHITKTTTWEDPRKTLAAQSAETMLAQATAPQTIAPATPTAAHLQRTPVAGAGAAGGGWANA  
SLQACQQKLRQLQSLQMERERLKQRQQEIMLQQELMGRQSSSIVSSLASGGAGAAGVPGAGGGAAADLDPFLSGLT  
EHQREQESADSGLGMVNPSSYMPHTPEDFLAGMDDRMDCSEAGAIKDPDISLGDNIDPTDDLVPVSLQLSEFTNDI  
LLDDVQSLINSTPSKTDNVLTWL PLRMRQLPKSFFNPP

rs:XP\_013176904 [XP\_013176904] PREDICTED: transcriptional coactivator  
YAP1 isoform X1 [Papilio xuthus]. 44..58

MALNTDSEQKSNLVLVRVDQSDSVLQSLFDTVLKPDSCRPLQVPLRMRQLPKSFFNPPSTGSKSPSVSH  
SRENSADSAFGSSSATGAAPVSHSRAHSSPASLQQTYAAGQQTQQAPLHHQHSHKQORSYDVGTHMQDDLGLPLPSGW  
EQARTPEGQIYYLNHITKTTTWEDPRKTLAAQSAETMLAQATAPQTIAPATPTAAKSTSSSAASDPLGLPLDGWE  
QAATPEGEVYFINHAARTTSWFDPRIPQHLQRTPVAGAGAAGGGWANASLQACQQKLRQLQSLQMERERLKQRQQE  
IMLQQELMGRQSSSIVSSLASGGATAGVQAGGGAAADLDPFLSGLTEHQREQESADSGLGMVNPSSYMPHTPE  
FLAGMDDRMDCSSEAGAIKDPDISLGDNIDPTDDLVPVSLQLSEFTNDILLDDVQSLINSTPNKTTDNVLTWL  
PLRMRQLPKSFFNPP

rs:XP\_013176905 [XP\_013176905] PREDICTED: transcriptional coactivator  
YAP1 isoform X2 [Papilio xuthus]. 44..58

MALNTDSEQKSNLVLVRVDQSDSVLQSLFDTVLKPDSCRPLQVPLRMRQLPKSFFNPPSTGSKSPSVSH  
SRENSADSAFGSSSATGAAPVSHSRAHSSPASLQQTYAAGQQTQQAPLHHQHSHKQORSYDVGTHMQDDLGLPLPSGW  
EQARTPEGQIYYLNHITKTTTWEDPRKTLAAQSAETMLAQATAPQTIAPATPTAAKSTSSSAASDPLGLPLDGWEQ  
AATPEGEVYFINHAARTTSWFDPRIPQHLQRTPVAGAGAAGGGWANASLQACQQKLRQLQSLQMERERLKQRQQE  
IMLQQELMGRQSSSIVSSLASGGATAGVQAGGGAAADLDPFLSGLTEHQREQESADSGLGMVNPSSYMPHTPE  
LAGMDDRMDCSSEAGAIKDPDISLGDNIDPTDDLVPVSLQLSEFTNDILLDDVQSLINSTPNKTTDNVLTWL  
PLRMRQLPKSFFNPP

rs:XP\_013176906 [XP\_013176906] PREDICTED: transcriptional coactivator  
yorkie isoform X3 [Papilio xuthus]. 44..58

MALNTDSEQKSNLVLVRVDQSDSVLQSLFDTVLKPDSCRPLQVPLRMRQLPKSFFNPPSTGSKSPSVSH  
SRENSADSAFGSSSATGAAPVSHSRAHSSPASLQQTYAAGQQTQQAPLHHQHSHKQORSYDVGTHMQDDLGLPLPSGW  
EQARTPEGQIYYLNHITKTTTWEDPRKTLAAQSAETMLAQATAPQTIAPATPTAAHLQRTPVAGAGAAGGGWANA  
SLQACQQKLRQLQSLQMERERLKQRQQEIMLQQELMGRQSSSIVSSLASGGATAGVQAGGGAAADLDPFLSGLTE  
HQREQESADSGLGMVNPSSYMPHTPEDFLAGMDDRMDCSSEAGAIKDPDISLGDNIDPTDDLVPVSLQLSEFTNDIL  
LDDVQSLINSTPNKTTDNVLTWL PLRMRQLPKSFFNPP

rs:XP\_013194178 [XP\_013194178] PREDICTED: transcriptional coactivator YAP1-like isoform X1 [Amyeloidis transitella]. 44..58

MALNTDGEQKSNLVLVRVDQSDSVLQSLFDTVLKPDSCRPLQVPLRMRQLPKSFFNPPSTGSKSPSVSH  
SRENSADSAFGSSSATGAAPVSHSRAHSSPASLQQTYYAAGQQNQQAAPLHHQHSKQRSYDVVSHIPDDLGLPLPPG  
WEQARTPEGQIYYLNHITKTTTTWDDPRKTLAAQNVASAVQQHQSSEALINQSPAQPAITPVATPAAKSTSSNTTT  
ESIPLPEGWEQATTLEGETYFINHATRRTTSWFDPRIPQHLQRTPAANAGVAGGGWANASLQASQQKLRQLSLQLE  
RERLQKQRQQEIRLQQELMSRQVTSLSNSIGTVTNTLSELDPFLSGLADHQREQSADSGLGMVAVSOSYMPHTPED  
FLASMDDRMDCSSEAGANLDSTDMTLGDNLDTTEDLVPSLQQLSEFTNDILLDDVQSLINSTPSKAGNVLTWL  
PLRMRQLPKSFFNPP

rs:XP\_013194179 [XP\_013194179] PREDICTED: transcriptional coactivator yorkie-like isoform X2 [Amyeloidis transitella]. 44..58

MALNTDGEQKSNLVLVRVDQSDSVLQSLFDTVLKPDSCRPLQVPLRMRQLPKSFFNPPSTGSKSPSVSH  
SRENSADSAFGSSSATGAAPVSHSRAHSSPASLQQTYYAAGQQNQQAAPLHHQHSKQRSYDVVSHIPDDLGLPLPPG  
WEQARTPEGQIYYLNHITKTTTTWDDPRKTLAAQNVASAVQQHQSSEALINQSPAQPAITPVATPAQHLQRTPAAN  
AGVAGGGWANASLQASQQKLRQLSLQLERERLQKQRQQEIRLQQELMSRQVTSLSNSIGTVTNTLSELDPFLSGLA  
DHQREQSADSGLGMVAVSOSYMPHTPEDFLASMDDRMDCSSEAGANLDSTDMTLGDNLDTTEDLVPSLQQLSEFTN  
DILLDDVQSLINSTPSKAGNVLTWL PLRMRQLPKSFFNPP

rs:XP\_015019507 [XP\_015019507] uncharacterized protein Dmoj\_GI18856, isoform B [Drosophila mojavensis].>tr:A0A0Q9XKT2\_DROMO [A0A0Q9XKT2]

SubName: Full=Uncharacterized protein, isoform B {ECO:0000313|EMBL:KRG04903.1}; 61..75

MSLSNKSNISEKEIDDEDMLSPKISTNLVVRVNDSDDNLQALFDSVLNPGDAKLPLQLPFRMRKLPN  
SFFNPPAPLHRSRANSADSTYDGSQTNINKTAQPEMQPSLTQQNQPSHSRLAIHHRARSSPASLQQNYNVRTRNE  
PSANNTNTNQGPAYPETSVDVFSASTANNIDLVDVINTCMGPVPGPDAAALAAATQTTIHKKQRSYDVVSPILQSQ  
LGALPPGWQAKTNDGQIYYLNHTSKTTQWEDPRIQFRQQQRALAEIKPNDVIQTTKPTSSTIATHLGLPLPD  
GWEQAVTESGDIYFINHIDRTTSWNDPRIQSGNLVLDPCPNLVSSLQIGDNICSNIFNDTQAIINTPSSHKPDDL  
EWYKIN PFRMRKLPNSFFNPP

rs:XP\_002005853 [XP\_002005853] uncharacterized protein Dmoj\_GI18856, isoform A [Drosophila mojavensis].>tr:B4KLX8\_DROMO [B4KLX8] SubName:

Full=Uncharacterized protein, isoform A {ECO:0000313|EMBL:EDW09788.1}; 61..75

MSLSNKSNISEKEIDDEDMLSPKISTNLVVRVNDSDDNLQALFDSVLNPGDAKLPLQLPFRMRKLPN  
SFFNPPAPLHRSRANSADSTYDGSQTNINKTAQPEMQPSLTQQNQPSHSRLAIHHRARSSPASLQQNYNVRTRNE  
PSANNTNTNQGPAYPETSVDVFSASTANNIDLVDVINTCMGPVPGPDAAALAAATQTTIHKKQRSYDVVSPILQSQ  
LGALPPGWQAKTNDGQIYYLNHTSKTTQWEDPRIQFRQQQRALAEIKPNESGLNVLDPCPNLVSSLQIGDNI  
CSNIFNDTQAIINTPSSHKPDDLEWYKIN PFRMRKLPNSFFNPP

rs:XP\_012594065 [XP\_012594065] protein **FAM181A** [Microcebus murinus].>rs:XP\_012594066 [XP\_012594066] protein **FAM181A** [Microcebus murinus]. 129..143

MASDSVDKMLLNFNVLASSDIKAALDKSAPCRRSVDHRKYLQKQLKRFSQKYSRLPRGLPGRAAEPHLK  
RGPEDRPGRLLLDPGPESGPGGGGCKEKALGNPYGEECLSKQVLQGSPEAARPGQVPMRKRQLPASFWEEP  
PHTSYVPGLEGGLGPREGPLYEGKKNCKGLEPLGPEAALVPMSPRALAEKEPLKMPGVSLVGRGNAWSCCPLQYH  
GQPIYPGLPGALPQSPIPGLGLWRKSPAFFGELAHFCKDVGDLGQVCRPVVLKPIPTKAMAPPIFNVFGYL  
PMRKRQLPASFWEEP

rs:XP\_014904663 [XP\_014904663] PREDICTED: transcriptional coactivator YAP1 [Poecilia latipinna].>rs:XP\_007570007 [XP\_007570007] PREDICTED: transcriptional coactivator YAP1 [Poecilia formosa].>tr:A0A3B3U6J2\_9TELE [A0A3B3U6J2] SubName: Full=Yes-associated protein 1 {ECO:0000313|Ensembl:ENSPLAP00000008955}; 45..59

MDPNQHNPAGHQIVHVRGDSQTDLELLFNLSVMNPKSSNVPASLPMRMRNLPSFFKPPPEPKSHSRQAS  
TDAGSGGVLTPHHVRAHSSPASLQLGAVSGGSLSGMASAGASPOHLRQSSYEIPDDVPLPAGWEMAKTTSGQRYF  
LNHNDKSTTWQDPRKALLQTSQPAPPSSVPVQPNLMNPANGPLPEHWEQAITSEGEIYYINHEKRTTSWLDPRL  
EPRYALNQQRMTQSAPGKQSGQLPPSTHGGVMAGNNQLRQLQIEKDRLRQLQHRPQELALRNQLPTSMDDQDSTN  
PISSPLAQDARTMTVNSSDPFLNSGTYHSRDESTDSGLSMSSYSVPRTPDDFLNSVDEMDTGDSLPMASQPSR

FPDYLDGIPGTDVDLGTLEGESMAVESEELMASLQEPLSSDILSDMESVLAATKIDKENFLTWL  
PMRMRNLPDSFFKPP

rs:XP\_014913692 [XP\_014913692] PREDICTED: protein **FAM181A** [Poecilia latipinna]. 102..116

MSSADSEVKTLNLFVNLAASSDIKAALDKSAPCRRSVDHRKYLQKQLKRFSQKFSRVPRGQTLTSADYRC  
ARGAERQVRTATDEASSDAQLAQSVGGVMDQVPMRKRQLPASFWEEPRLTKARRDKPCLDLRRSSSSGTSDDGEN  
ERRRRSQEDAQKTANSSSGRRSSAEKEVLKLDLTSRHSVFCSCCPFFQFQGHQVLHSQIVVPHPPFGLWSKAAEP  
ERSEHPYGQKLHTHVVVKPIPTKATAQSPILSVFGFI PMRKRQLPASFWEEP

rs:XP\_014831258 [XP\_014831258] PREDICTED: protein **FAM181A** [Poecilia mexicana]. 102..116

MSSADSEVKTLNLFVNLAASSDIKAALDKSAPCRRSVDHRKYLQKQLKRFSQKFSRVPRGQTLTSADYRC  
ARGAERQVRTATDEASSDAQHAQSVGGVMDQVPMRKRQLPASFWEEPRLTKARRDKPCLDLRRSSSSGTSDDGEN  
ERRRRSQEDAQKTANSSSGRRSSAEKEVLKLDLTSRHSVFCSCCPFFQFQGHQVLHSQIVVPHPPFGLWSKAAEP  
RSEHPYGQKLHTHVVVKPIPTKATAQSPILSVFGFI PMRKRQLPASFWEEP

rs:XP\_005724066 [XP\_005724066] PREDICTED: protein **FAM181A** [Pundamilia nyererei].>rs:XP\_026008629 [XP\_026008629] protein **FAM181A** [Astatotilapia calliptera].>rs:XP\_005916781 [XP\_005916781] PREDICTED: protein **FAM181A** [Haplochromis burtoni]. 102..116

MANADSEVKTLNLFVNLAASSDIKAALDKSAPCRRSVDHRKYLQKQLKRFSQKYSRVPRCHTHRSAEYRC  
AKPMGSVHQSVAEKASSGAQDQDQLGSSVEQVPMRKRQLPASFWEEPPLTPTKREHSYLGMRSHAGTSEGTENE  
KRKRSCDDDAKTAISACSRSSADKETLKLVDVTSRHSVFCSCCPFFQYHGHQILHNHIFVPHPLGLWSKAAAGTE  
TERSEHPYGQKIHTHVVKPIPTKPTAQSPIFSVFGFI PMRKRQLPASFWEEP

rs:XP\_005735999 [XP\_005735999] PREDICTED: transcriptional coactivator YAP1 [Pundamilia nyererei].>tr:A0A3B4FS17\_9CICH [A0A3B4FS17] SubName: Full=Yes-associated protein 1 {ECO:0000313|Ensembl:ENSPNYP00000012413}; 45..59

MDPSQHNPAGHQIVHVRGDSETDLEALFNAVMPKVNTPHVSVPMMRKLKLPDSFFKPPPEPKSHSRQAS  
TDAGSGGVLIPHVRAHSSPASLQLGAVSGGSLSGMGSTGASPOHLRQSSYEIPDDLPLPDGWEMAKTASGQRYF  
LNHIDQTTTWDPRKALLQMNQPAPPSSVPVQPOPIMNPASGSLPDGWQAITAEGEIYYINHNKNTTSWLDPRL  
EPRYALNQQRISQSAPVKQAGQLPPSISGVMGSNNQMRLOMEKERLRQKQELLRQRPOELALRNQLPTSMDQDG  
STNPVSSPMAQDARTMTANSSDPFLNSGTYHSRDESTDSGLSMSSYSVPRTPDDFLNSVDEMDTGDPLAPSMATQ  
PSRFPDYLDITPGTDVDLGTLEGESMAVEGEELMPSLQEQALSSDILNDMESVLAATKLDKESFLTWL  
PMRMRKLKLPDSFFKPP

rs:XP\_005736013 [XP\_005736013] PREDICTED: protein **FAM181B** [Pundamilia nyererei].>rs:XP\_005926585 [XP\_005926585] PREDICTED: protein **FAM181B** [Haplochromis burtoni].>rs:XP\_004560587 [XP\_004560587] protein **FAM181B** [Maylandia zebra]. 155..169

MAVQTAIMNPQFMNFCFPGSVMEYDVEKSLDGSLLGETENDEYKETTDRDLSFIDSASSNIKLALDKP  
VSKRKNVNRKYLQKQIKRGTGIIITPGNAEAPVKRQGSPLTQPSSTLQSKTLPKRDGVQANLQSKSLAALFSPVK  
DIRGEKPKKPLRHRNLPPSFFTEPANCSKVSSTSGMTLKDRLERGNPEATEFFELLGPDYCNMVSDDQDIYQGMPL  
RVQPELGGPDASYDTHHLVGGLLYSEPWTSCSGPSKKGESMRTGPAQPPVYCQSEGATGPIEDNALCTLAFFN  
FFADCPQPVTYDLTGGINRANYSSL PLRHRNLPPSFFTEP

rs:XP\_005751097 [XP\_005751097] PREDICTED: transcriptional coactivator YAP1-like isoform X1 [Pundamilia nyererei].>rs:XP\_026037126 [XP\_026037126] transcriptional coactivator YAP1-like isoform X1 [Astatotilapia calliptera].>rs:XP\_026037127 [XP\_026037127] transcriptional coactivator YAP1-like isoform X1 [Astatotilapia calliptera]. 45..59

MDAHRGAPPAGQQIVHVRGDSQTELEALFTAVMNPNAKQPSSLPMMRKLKLPDSFFRQPDPRGHSRQAS  
SDGGVCGSQAPHVRAHSSPASLPVNSLSTQAADVAATPIIPDDMPLPRGWEMAKTPTGQRYFLNHLDKTTTWH  
PRLAQLQSAQAHPISGPPVHAHLSNPAPTTQPQINPEKGPLPEGWEQAVTADGEMYYIDHINKNTTWVDPRL  
AQKMNP SILGMAMQSQEKDRLRCKQGIPIQIAPQDVGGRSQMPGGMDHRSATLVPPLDVRIRASNHEPTLNG  
AHSRNESTDSGLSVSSLPRTTDDHMLSSVEHMDTGDSEPPSMALQDSMPVLPMSSEGEELMPCIPPEGLSSDLLMDME  
TVLSGSHMDRDSLTLWL PMRMRKLKLPDSFFRQP

rs:XP\_005751098 [XP\_005751098] PREDICTED: transcriptional coactivator YAP1-like isoform X2 [Pundamilia nyererei].>rs:XP\_026037128 [XP\_026037128] transcriptional coactivator YAP1-like isoform X2 [Astatotilapia calliptera].>rs:XP\_006800089 [XP\_006800089] PREDICTED: yorkie homolog [Neolamprologus brichardi]. 45..59

MDAHRGAPPAGQQIVHVRGDSQTELEALFTAVMNPNAAKQPSSLPMMRKLKLPDSFFRQPDPRGHSRQAS  
SDGGVCGSQAPHHVRAHSSPASLPVNSLSTQAADVAATPIIPDDMPLPRGWEMAKTPTGQRYFLNHLDKTTTWH  
PRLAQLQSAAAQHPISGPPVHAHSLSNPAPTTQPONINPEKAQKMNPSILGMAMQSQEKDRLRCKQGIPOQIAP  
QDVGGRSQMPGGMDHRSQAQTLVPSLDVRIRASNHEPTLNGAHSRNESTDSGLSVSSLPRTTDHMLSSVEHMDTG  
DSEPPSMALQDSMPVLPMSGEELMPCIEPGLSSDLLMDMETVLSGSHMDRDSLLTTLW PMRMRKLKLPDSFFRQ

rs:XP\_006208286 [XP\_006208286] PREDICTED: protein **FAM181A** [Vicugna pacos]. 129..143

MASDSVVKMLLNFNVLASSDIKAALDKSAPCRRSVDHRKYLQKQLKRFSQKYSRLPRGLPSRGAEPHLK  
RVPEDRPGRRLPRDSGHNSPSGGGGYKEKALGNPYREECLPKEQTLQGDPEAARPGQVPMRKRQLPASFWEEP  
PTHSYPMGLEGLGPREGLPYEGKKHCKGLEPLGPETAPLPTKEPLKMPGVSLVGRVNAWSCCFFQYHGQPIYP  
GPPGALPQSPVSGGLWRKSSASPGELVHFCKDVEGPGQKVYRPVVLKPIPTKPAVPPPIFNVFGYL  
PMRKRQLPASFWEEP

rs:XP\_013796471 [XP\_013796471] PREDICTED: protein **FAM181A** [Apteryx australis mantelli]. 127..141

MASDSEVKTLNLFVNLASSDIKAALDKSAPCRRSVDHRKYLQKQLKRFSQKYSRIPRCHPSKSAECSVK  
RGTEDRSRGSQSEVVDSHHCRAAAQKVLRTAKVEENFSGEQVLQEQNPEPARPDQVPMRKRQLPASFWEEP  
QSLARSFPAGLDGLPNSGDPVVPYEGKSRSPPEAGPESPPPEVQHGSEDPKAPGPPMSGRVAAWTCCPFQCP  
GQPLYQTPGALPPSPFPGLGLWRKSAALPGEIQHFSKEADSTGQKLYRPMVLKPIPTKPAVPPPIFNVFGYI  
PMRKRQLPASFWEEP

rs:XP\_013913644 [XP\_013913644] PREDICTED: protein **FAM181B** [Thamnophis sirtalis]. 226..240

MAVQAAPPPPHHPFVFPFGFPTADFGALEKSCYGDGAALLLLEGGVGVASGIGGVEGGVGGVGGVGCPEAA  
DFREATRELLSFIDSASSNIKLALDKPGKSKRVNHRKYLQKQIKRCTGLLGGNAEPGAGSVPGSSPAAAAA  
PTNKQASASPSSGGGAAAAAPSCPKAKRESKSLAALFDSLARGAPTAVATAASPAGPSGCASGKEAGSAPPTAA  
VACKKVPLRNRNLPRSFTEPAPNRPAPNAGLEGGGGGGGAGVPVSAEELFDLLAAPDYRALLQESSEPPPPPP  
PVFPAELPLEPPLYEPLPSLAPLLYAETPLRPLPALYA AVAVSDPTAPFFADCPPLPPPPSMPYDYGYSRGAPYPS  
L PLRNRNLPRSFTEP

rs:XP\_013914507 [XP\_013914507] PREDICTED: protein **FAM181A** [Thamnophis sirtalis]. 138..152

MASADSEVKTLNLFVNLASSDIKAALDKSAPCRRSVDHRKYLQKQLKRFSQKYSRLPRCHHHHLQPQLP  
PARERRPPEGRVRLSPSSSLGRGHAASGASKGDKASKAPERLGGEKQQQQQQAGTSEAGARPDQVPMRKRQL  
PASFWEEP RPAPGSPGVVSGVIFPMGVCSSPSSSSSSKDLLPPYEGKKNKIGLDGGSGGTGAVLESPPRRPEAEA  
ALKGLRTWGCCPFQYHGPQASPGVYPPPLPAALPPLAPFSALGLWRKDAPSPTEGEPFCQPGQKVYRPVWVKPI  
TKPAAPPLIFSVFSYL PMRKRQLPASFWEEP

rs:XP\_013929736 [XP\_013929736] PREDICTED: transcriptional coactivator YAP1-like, partial [Thamnophis sirtalis]. 80..94

MDVGGPQQAPSAAQPQPSQGQPTGQASPPAPQPGGAVSGPPPAGHQVVHVRGDSETDLEALFNAVMN  
PKGANVPHTLPMRLRKLKLPDSFFKPPPEPKAHSRQASTDAGTAGALTPQHVRHSSPALLGTVSPGALTPSGVVP  
TPSQHLRQSSFEIPDDVPLPPGWEMAKTPSGQRYFLNHIDQTTTWQDPRKTLTLLSQMNVTAPTSPPVQQNIMNSAT  
PMRLRKLKLPDSFFKPP

rs:XP\_013869014 [XP\_013869014] PREDICTED: protein **FAM181A** [Austrofundulus limnaeus].>tr:A0A2I4BMP7\_9TELE [A0A2I4BMP7] SubName: Full=protein **FAM181A** {ECO:0000313|RefSeq:XP\_013869014.1}; 109..123

MRQAKDLANMANADSEVKTLNLFVNLASSDIKAALDKSAPCRRSVDHRKYLQKQLKRFSQKYSRVPRCH  
THRSTDYRCLKPAGAAHQSAQKGGSDARDAESVGGVEQVPMRKRQLPASFWEEPRLTKAKRDKSCSRSPV  
GASD GGEKRKTSGLDDAKASPSNRSSADREVLKLDVSSQHSVSVCGCCPLQYHGHVHLHSHIVVPHPLALWSKASGT  
EEQPYVQRLHTHVVKPIPTKPTAQSPIFSVMFGFI PMRKRQLPASFWEEP

rs:XP\_013858633 [XP\_013858633] PREDICTED: transcriptional coactivator  
YAP1-like isoform X1 [Austrofundulus limnaeus].>tr:A0A2I4AT48\_9TELE  
[A0A2I4AT48] SubName: Full=transcriptional coactivator YAP1-like isoform X1  
{ECO:0000313|RefSeq:XP\_013858633.1}; 48..62  
MDAHRGGSAPPAGQQVVHVRGDSKSELEALFSAVMNPNGKAARQPQSLPMRMRNLPSFFKPPEPRGHSR  
QASSDGGVCGSLAPHHVRAHSSPASLPVNSLSAQAAADVATSPILPDDVPLPDGWEMAKTPTGQRYFINHLQKTT  
TWQDPRLSQLQSAAVHHQIPCAPVHAHSFSNPAPTTQPQTISSETGPLPEGWEQAVTADGEVYYIDHINKITTWV  
DPRLAQKMNPGMLSLQQRQEKERLRGKIGIPPQIAPQEAAGRSQIPGGMDHDRSTQMLVPSVDVVRIRALNQEPTL  
NGAHSRNESTDSGLSVSSLPRSSDHMLSTVDHMDTGDSSSEPPSVTMQEMPVLPITEGEELMPCIPDGLNSDLLMD  
METVLSGPHMDRDSLTLWL PMRMRNLPSFFKPP

rs:XP\_013858634 [XP\_013858634] PREDICTED: transcriptional coactivator  
YAP1-like isoform X2 [Austrofundulus limnaeus].>tr:A0A2I4AT23\_9TELE  
[A0A2I4AT23] SubName: Full=transcriptional coactivator YAP1-like isoform X2  
{ECO:0000313|RefSeq:XP\_013858634.1}; 48..62  
MDAHRGGSAPPAGQQVVHVRGDSKSELEALFSAVMNPNGKAARQPQSLPMRMRNLPSFFKPPEPRGHSR  
QASSDGGVCGSLAPHHVRAHSSPASLPVNSLSAQAAADVATSPILPDDVPLPDGWEMAKTPTGQRYFINHLQKTT  
TWQDPRLSQLQSAAVHHQIPCAPVHAHSFSNPAPTTQPQTISSETAQKMNPGMLSLQQRQEKERLRGKIGIPPQI  
APQEAAGRSQIPGGMDHDRSTQMLVPSVDVVRIRALNQEPTLNGAHSRNESTDSGLSVSSLPRSSDHMLSTVDHMD  
TGDSSSEPPSVTMQEMPVLPITEGEELMPCIPDGLNSDLLMDMETVLSGPHMDRDSLTLWL  
PMRMRNLPSFFKPP

rs:XP\_013858635 [XP\_013858635] PREDICTED: transcriptional coactivator  
YAP1-like isoform X3 [Austrofundulus limnaeus].>tr:A0A2I4AT08\_9TELE  
[A0A2I4AT08] SubName: Full=transcriptional coactivator YAP1-like isoform X3  
{ECO:0000313|RefSeq:XP\_013858635.1}; 48..62  
MDAHRGGSAPPAGQQVVHVRGDSKSELEALFSAVMNPNGKAARQPQSLPMRMRNLPSFFKPPEPRGHSR  
QASSDGGVCGSLAPHHVRAHSSPASLPVNSLSAQAAADVATSPILPDDVPLPDGWEMAKTPTGQRYFINHLQKTT  
TWQDPRLSQLQSAAVHHQIPCAPVHAHSFSNPAPTTQPQTISSETGPLPEGWEQAVTADGEVYYIDHINKITTWV  
DPRLAQKMNPGMLSLQQRQEKERLRGKIGIPPQIAPQEAAGRSQIPGGMDHDRSTQMLVPSVDVVRIRALNQEPTL  
NGAHSRNESTDSGLSVSSLPRSSDHMLSTVDHMDTVFPIM PMRMRNLPSFFKPP

rs:XP\_013868176 [XP\_013868176] PREDICTED: protein **FAM181B** [Austrofundulus  
limnaeus].>tr:A0A2I4BKA8\_9TELE [A0A2I4BKA8] SubName: Full=protein **FAM181B**  
{ECO:0000313|RefSeq:XP\_013868176.1}; 155..169  
MAVQTAIMNPQFMSFCFPDAVMEYDMEKSPDGGLLCEAENDGDFKETTDRDLSFIDSASSNIKLALDKP  
VKSKRKNVHRKYLQKQIKRCTGIIIGPNAEAPAKRQGSQSPSQSPLQSKTLPKRDGLQANLQSKSLAALFNPGK  
DVKGEKAKKPLRHRNLPPSFFTEPAHCSKVSSTSGMTLKDLEGRNPEAADFFELLGPDYSNMMSQDLYQGAPL  
RAQPD LGVMDPGSYDAHHLVGGLLYSEPWTGCSGSPSKLVTSPAPPAGYQCSESDASGPVDDNGLCTLAFSNFFTD  
CSIPQVAYDLNCGYKGNYSLL PLRHRNLPPSFFTEP

rs:XP\_013868238 [XP\_013868238] PREDICTED: transcriptional coactivator  
YAP1 [Austrofundulus limnaeus].>tr:A0A2I4BKJ3\_9TELE [A0A2I4BKJ3] SubName:  
Full=transcriptional coactivator YAP1 {ECO:0000313|RefSeq:XP\_013868238.1};  
45..59  
MDPSQHNPPAGHQIVHVRGDSSETDLETFLNIVMNPNSPNIPHCVPMRQRKLPDSFFNPPEPKSHSRQAS  
TDAGSGAVLTPHHVRAHSSPASLQLGAVSGGSLSGMASAGVSPQHRLRQSSYEIPDDVPLPAGWEMAKTSSGQRYF  
LNHIDKTTTWQDPRKPLLQMNQAAPPSVPPVQQNPMNPASGTLPDGWQAITPDGEIYYINHKNKTTSWLDPRL  
EPRYALNQQRITQSAPVKQGQLPSSPHGGVMGNNQLRLQOIEKERLRKQHEALRQRPELALRNQLPTSMQD  
DGGTNPVSSPLAQDARTMTANSSDPFLNSGTYHSRDESTDSGLSMSSYSVPRTPDDFLNSVDEMDTGDQLPPSMA  
TQPSRFPDYLD AIPGTDVLDLGTLEGESMAVEGEELMPSLQEP LSSDILSDMESVLAATKIDKESFLTWL  
PMRQRKLPDSFFNPP

rs:XP\_005516790 [XP\_005516790] PREDICTED: protein **FAM181B** [Pseudopodoces  
humilis]. 171..185  
MAVPAALLSPHLLSFCFPAAGLLGYADLEKGYEGGGDAGDFREATRDLSFIDSASSNIKLALDRP  
VKSRRKNVHRKYLQKQIKRCTGIIAAAPPPAACPPSACPARPPRREPAQAAGSSLQSKSLAALFGLQRGRGA  
AGGAEAKAGGGGAGGGEKAAGGPRKVPLRDRNLPPSFFTEPALPGPAARGPPAKEPEKGGGGAEATEFFELLCP



YGALLPEHAAPTDAFGGRLPAELGLEHGLYELPLPAGPHLLGGLLYPEPPWSPAAPCSPPRKAPAEPLRPLYPG  
GAEPVPGGGGGGEEPPGGHLPAVAPFFPECLPPPQPPYDYGGGYHRGGYPGL PLRDRNLPPSFFTEP

rs:XP\_014106265 [XP\_014106265] PREDICTED: transcriptional coactivator  
YAP1 isoform X1 [Pseudopodoces humilis]. 85..99

MDPGQPQTQQPPQAAQPPASQQQPPPPQPPGAVSGAAAGAAQPPGAGPPPAGHQIVHVRGDSETDLEALF  
NAVMNPKGANVPHTLPMRLRKLKLPDSFFKPPPEPKAHSRQASTDAGTAGALTPQHVRHSSPASLQLGAVSPGTLTP  
SGVVTGPGAPSSQHLRQSSFEIPDDVPLPPGWEMAKTPSGQRYFLNHIDQTTTWQDPRKAMLSQMNVTAPTSPSV  
QQNIMNSASAMNQIRISQSAPVKQPPPLAPQSPQGGVMGGSSSNQQQQMRLQQLQMEKERLRLKHQELLRQELALR  
SQLPTMEQDGGSQNPVSSPGMSQELRTMTTNSSDPFLNSGTYHSRDESTDSGLSMSSYSVPRTPDDFLNSVDEMD  
TGDSIGQSNIPSHQNRFPDYLEAIPGTNVLDLGTLEGDGMNIEGEEMLPSLQEQALSSDILNDMESVLAATKLDKES  
FLTWL PMRLRKLKLPDSFFKPP

rs:XP\_005520227 [XP\_005520227] PREDICTED: protein **FAM181A** [Pseudopodoces  
humilis]. 128..142

MASDSEVKTLLNFVNLAASSDIKAALDKSAPCRRSVDHRKYLQKQLKRFSQKYSRIPRCHHPSKPAECGW  
RRGAEDRARGPLPEAPEPSSHGGATAEKVMQTAEAEESLTGDRVLQEQKPEAARPDQVPMRKRQLPASFWEEP  
AQSLTARAFPASPEGLQAPRDPPPYEKKSRSKSPDAAGPESPPDTAPHAGEKDPAGPLSGRVGTWTCCPFPCPGP  
GVFQPPGALPPSPFPGLGLWRKSAAPLPAEVPFRFCKEADGPGQKLYRPMVLKPIPTKPAIPPPPIFNVFGYL  
PMRKRQLPASFWEEP

rs:XP\_005896258 [XP\_005896258] PREDICTED: protein **FAM181A** [Bos mutus].  
130..144

MASDSVDMLLNFVNLAASSDIKAALDKSAPCRRSVDHRKYLQKQLKRFSQKYSRLPRGLPGRGAEPHLK  
RGPEDRSGRPLPLESGHGSSPGGGGGCKEKALGNLDREESLSKERTLHGPDPGAARPGQVPMRKRQLPASFWEEP  
RPTHSPVVGLEGLGPREGPPYEGKKHCKGLEPLGPETTPVPTSPRAPAEKEPLKMPGVSLVGRVSAWSCCPFY  
HGQPVYPSPPGALPQSPMPSLGLWRKSAASPGELAHFCKDAEGPGQKVYRPVVLKPIPTKPAVPPPIFNVFGYL  
PMRKRQLPASFWEEP

rs:XP\_014354483 [XP\_014354483] PREDICTED: uncharacterized protein  
LOC102364766 [Latimeria chalumnae].>tr:M3XI84\_LATCH [M3XI84] SubName:  
Full=Uncharacterized protein {ECO:0000313|Ensembl:ENSLACP00000022440};  
120..134

MMAYFNDREVKTLLNFVNLAASSDIKAALDKSAPCKRSVDHRKYLQKQLKRFSQKKLASKASPSPAKDPP  
ANKHPSNMSSDSEVDSNSFSQPGIWTLPSTRYNGLLQPGKMDSRKSESLPLRKRRLPASFWKEPGPLDKLAPPQ  
LSDWESLLASEDARESQVPVPKSSTFLPSCGLPRELSAAQPNHHISCTASQECGCRCCVLSHSDCLVFPPLQAL  
IPLQFLPCVEVGALPFPTQREASFFQNEVETFAIWKPVVTKPAAVLQPYGPGVNL PLRKRRLPASFWKEP

rs:XP\_006001898 [XP\_006001898] PREDICTED: protein **FAM181B** [Latimeria  
chalumnae].>tr:H2ZW23\_LATCH [H2ZW23] SubName: Full=Family with sequence  
similarity 181 member B {ECO:0000313|Ensembl:ENSLACP00000001594};  
155..169

MAVQAAMNPHFIHFCFSPVMDYDMEKTYDGALLGEVDAGGEFREATRDLLSFIDSASSNIKLALDKP  
VSKSRKVNHRKYLQKQIKRCTGMI STGNVNQEVTKRQSSSPSNSNNFQCKPPAKRDGSHSNLQSKSLAALFDSVK  
EIRGDKSKKVPRLNRNLPPSFFTEPANVSKVNSTSGMTLKDLEGRNPEAADFFELLGPEYSNMISDQEVFQGASV  
RIHQDLTDDHGLYEPHMLMGFFLYSDSWNPNNLTCKNTLGVCNMNTNENMRTIPVQTAMYTNAEPTVTPMEESS  
LSLPSFPHFFPDCSFPQVSYDYSTPYNRASYPVL PLRNRNLPPSFFTEP

rs:XP\_014352180 [XP\_014352180] PREDICTED: transcriptional coactivator  
YAP1 isoform X1 [Latimeria chalumnae]. 45..59

MDPSQQHPPAGHQIVHVRGDSETDLEALFNAVMNPKSANVPHSVPMRMRKLKLPDSFFRQPEPKSHSRQAS  
TDAGSAGALTPQHVRHSSPASLQLGAVSPGTMASGGVSGQGPQPSQHLRQSSFEIPDDVPLPPGWEMAKTPS  
GQRYFLNHIDQTTTWQDPRKALLPQMNVTAPTSPVQQNIMSPSSGKQAGPLPDGWEQAMTQEGEIIYINHKNKT  
TSWLDPRLDPRFGINQQRMSQSAPVKQAPPLAPPSPQSGVMGGSSNQQQQMRLQQLQMEKERLRLKHQELLRQVRP  
QELALRSQLPTMEQDGGSQNPVSPPGMSQDVRTMTTNSSDPFLNSGTYHSRDESTDSGLSMSSYSVPRTPDDFLN  
SVDEMDTGDITIGQSNLASQQNRFPDYLETIPGTNVLDLGTLEEDGMNVEGEEMLPSLQEQALSTDILNDMESVLAAT  
KIDKETFLTWL PMRMRKLKLPDSFFRQP

rs:XP\_014352181 [XP\_014352181] PREDICTED: transcriptional coactivator  
YAP1 isoform X2 [Latimeria chalumnae]. 45..59

MDPSQQHPPAGHQIVHVRGDSETDLEALFNAVMPKNSANVPHSVPMRMRKLPDSFFRQPEPKSHSRQAS  
TDAGSAGALTPQHVAHSSPASLQLGAVSPGTMTASGGVSGGGPQPQSQHLRQSSFEIPDDVPLPPGWEMAKTPS  
GQRYFLNHIDQTTTWDPRKALLPQMNVTAPTSPVQONIMSPSSGKAGPLPDGWEQAMTQEGEIIYINHNKNTTSWL  
DPRLDPRFGINQQRMSQSAPVKQAPPLAPPSPQSGVMGGSNQQQQMRLQQLQMEKERLRLKHQELLRQVVRPQELA  
LRSQLPTMEQDGGSQNPVSPPGMSQDVRTMTTNSDPFLNSGTYHSRDESTDSGLSMSSYSVPRTPDDFLNSVDE  
MDTGDTIGQSNLASQQNRFPDYLETIPGTNVDLGTLEEDGMNVEGEELMPSLQEQALSTDILNDMESVLAATKIDK  
ETFLTWL PMRMRKLPDSFFRQP

rs:XP\_014352182 [XP\_014352182] PREDICTED: transcriptional coactivator  
YAP1 isoform X3 [Latimeria chalumnae]. 45..59

MDPSQQHPPAGHQIVHVRGDSETDLEALFNAVMPKNSANVPHSVPMRMRKLPDSFFRQPEPKSHSRQAS  
TDAGSAGALTPQHVAHSSPASLQLGAVSPGTMTASGGVSGGGPQPQSQHLRQSSFEIPDDVPLPPGWEMAKTPS  
GQRYFLNHIDQTTTWDPRKALLPQMNVTAPTSPVQONIMSPSSGKAGPLPDGWEQAMTQEGEIIYINHNKNT  
TSWLDPRLDPRFGINQQRMSQSAPVKQAPPLAPPSPQSGVMGGSNQQQQMRLQQLQMEKERLRLKHQELLRQELA  
LRSQLPTMEQDGGSQNPVSPPGMSQDVRTMTTNSDPFLNSGTYHSRDESTDSGLSMSSYSVPRTPDDFLNSVDE  
MDTGDTIGQSNLASQQNRFPDYLETIPGTNVDLGTLEEDGMNVEGEELMPSLQEQALSTDILNDMESVLAATKIDK  
ETFLTWL PMRMRKLPDSFFRQP

rs:XP\_006009477 [XP\_006009477] PREDICTED: transcriptional coactivator  
YAP1 isoform X4 [Latimeria chalumnae]. 45..59

MDPSQQHPPAGHQIVHVRGDSETDLEALFNAVMPKNSANVPHSVPMRMRKLPDSFFRQPEPKSHSRQAS  
TDAGSAGALTPQHVAHSSPASLQLGAVSPGTMTASGGVSGGGPQPQSQHLRQSSFEIPDDVPLPPGWEMAKTPS  
GQRYFLNHIDQTTTWDPRKALLPQMNVTAPTSPVQONIMSPSSGKAGPLPDGWEQAMTQEGEIIYINHNKNTTSWL  
DPRLDPRFGINQQRMSQSAPVKQAPPLAPPSPQSGVMGGSNQQQQMRLQQLQMEKERLRLKHQELLRQELALRSQ  
LPTMEQDGGSQNPVSPPGMSQDVRTMTTNSDPFLNSGTYHSRDESTDSGLSMSSYSVPRTPDDFLNSVDEMDTG  
DTIGQSNLASQQNRFPDYLETIPGTNVDLGTLEEDGMNVEGEELMPSLQEQALSTDILNDMESVLAATKIDKETFL  
TWL PMRMRKLPDSFFRQP

rs:XP\_014352183 [XP\_014352183] PREDICTED: transcriptional coactivator  
YAP1 isoform X5 [Latimeria chalumnae]. 45..59

MDPSQQHPPAGHQIVHVRGDSETDLEALFNAVMPKNSANVPHSVPMRMRKLPDSFFRQPEPKSHSRQAS  
TDAGSAGALTPQHVAHSSPASLQLGAVSPGTMTASGGVSGGGPQPQSQHLRQSSFEIPDDVPLPPGWEMAKTPS  
GQRYFLNHIDQTTTWDPRKALLPQMNVTAPTSPVQONIMSPSSGKAGINQQRMSQSAPVKQAPPLAPPSPQS  
GVMGGSNQQQQMRLQQLQMEKERLRLKHQELLRQVVRPQELALRSQLPTMEQDGGSQNPVSPPGMSQDVRTMTTNS  
SDPFLNSGTYHSRDESTDSGLSMSSYSVPRTPDDFLNSVDEMDTGDTIGQSNLASQQNRFPDYLETIPGTNVDLG  
TLEEDGMNVEGEELMPSLQEQALSTDILNDMESVLAATKIDKETFLTWL PMRMRKLPDSFFRQP

rs:XP\_014352184 [XP\_014352184] PREDICTED: transcriptional coactivator  
YAP1 isoform X6 [Latimeria chalumnae]. 45..59

MDPSQQHPPAGHQIVHVRGDSETDLEALFNAVMPKNSANVPHSVPMRMRKLPDSFFRQPEPKSHSRQAS  
TDAGSAGALTPQHVAHSSPASLQLGAVSPGTMTASGGVSGGGPQPQSQHLRQSSFEIPDDVPLPPGWEMAKTPS  
GQRYFLNHIDQTTTWDPRKALLPQMNVTAPTSPVQONIMSPSSGINQQRMSQSAPVKQAPPLAPPSPQSGVMG  
GSNQQQQMRLQQLQMEKERLRLKHQELLRQVVRPQELALRSQLPTMEQDGGSQNPVSPPGMSQDVRTMTTNSDPF  
LNSGTYHSRDESTDSGLSMSSYSVPRTPDDFLNSVDEMDTGDTIGQSNLASQQNRFPDYLETIPGTNVDLGTLEE  
DGMNVEGEELMPSLQEQALSTDILNDMESVLAATKIDKETFLTWL PMRMRKLPDSFFRQP

rs:XP\_006010249 [XP\_006010249] PREDICTED: protein **FAM181A** [Latimeria  
chalumnae].>tr:H2ZZY0\_LATCH [H2ZZY0] SubName: Full=Family with sequence  
similarity 181 member A {ECO:0000313|Ensembl:ENSLACP00000002951};  
128..142

MASDSEVKTLLNFVNLASCDIKAALDKSAPCRRSVDHRKYLQKQLKRFSQKYSRIPRCHPSRLAETSLK  
NTVEDKSRGFILDRSELNFKTLHENVSRASELDCGASKSDHILSDQGEVGRQDHPMRKRQLPASFWEEP  
TKTLLTPSHLHVEQQSVPPVNESVSDVKSESRRTCAESAQDTLGLPVQLCREKEPVKQMTSISRMSLCGCCS  
FQYHGQHVFTIALPQSGFPDVLWRKNGVSNIEVQNICKDSINGQNVHRPVVLKPIPTKPAVPPPIFNVFGFL  
PMRKRQLPASFWEEP

rs:XP\_014366949 [XP\_014366949] PREDICTED: transcriptional coactivator YAP1 [*Papilio machaon*]. 44..58

MALNSDSEQKSNLVLVRVDQSDSVLQSLFDTVLKPDSCRPLQVPLRMRQLPKSFFNPPSTGSKSPSVSH  
SRENSADSAFGSSSATGAAPVSHSRAHSSPASLQQTYYAAGQQTQQAPLHHQHSHKQORSYDVGTHMQDDLGLPLPSGW  
EQSLLRVSDIDYICQLPIYSIHVRLVLIDRYRLISAASSTSSAASDPLGPLPDGWEQAATPEGEVYFINHAART  
TSWFDPRIPQHLQRTPVAGAGAAGGGWANASLQACQOKLRLQSLQMERERLQQRQOEIMLQOELMGRQSSSIVSS  
LASGGGAGAAGVQGAGAGGGAAADLDFLSGLTEHQRESADSGLGMVNPSSYMPHTPEDFLAGMDDRMDCTSE  
AGAIDPDISLGDNIDPTDDLVPSSLQSEFTNDILLDDVQSLINSTPSKTDNVLTLW PLRMRQLPKSFFNPP

rs:XP\_022077855 [XP\_022077855] protein **FAM181A** [*Acanthochromis polyacanthus*]. 104..118

MANADSEVKTLNLFVNLASSDIKAALDKSAPCRRSVDHRKYLQKQLKRFSQKYSRVPRCHTHRSAEYRC  
AKPAGTVHQSVAVSEKASSDAQDVENVGSAVEQVPMRKRQLPASFWEEPFLTQTKREHSYGLRKSAGTSEGNE  
NEKRKRSYDEDAKATMSASSRRNSVDKETLKLDSLSSHQCVSVCGCCPFQYHGHQVLHSHIVVPHPLGLWSKAAG  
TETERLEHPYGQKIHTHVVKPIPTKPTAQSPIFSVFGFI PMRKRQLPASFWEEP

rs:XP\_022044655 [XP\_022044655] LOW QUALITY PROTEIN: protein **FAM181B** [*Acanthochromis polyacanthus*]. 246..260

MQVVGHKQRVKXPALPLPLLLFDVLTSLARPPERSPRXSSEPVTSTLECLQELHEQHQQDQVFIKGGKTC  
EEILGSEITVDATGVAAGLNTVMAVQTAIMNPQFMNFCFPQSVMEYDVEKSLDGSLLGEAENDEYKETTRDLS  
FIDSASSNIKLALDKPVKSKRKNVHRKYLQKQIKRGTGIITPGNVAEAPVKRQGSPLTQPSPLQSKTLPKRDGVQ  
ANLQSKSLAALFSPVKDIRGEKAKKPLRHRNLPPSFFTEPANCSKVSSTSGMSLKDLEGRNPEAADFFELLGPD  
YSNMVSDQDLYQGMFPRVQPELGGPDASYDAHHLVGGLLYSEPWTSCSGPSKKLGESLRTGPAQPPAYCHSEAA  
SGPIEDNALCTLAFNFFTDCSIPOVQTYDLSSGGYNRANYSSL PLRHRNLPPSFFTEP

rs:XP\_022044766 [XP\_022044766] transcriptional coactivator YAP1 [*Acanthochromis polyacanthus*]. 45..59

MDPSQHNPAGHQIVHVRGDSETDLEALFNAVMPKNTIVPPSVPMRMRKLPDSFFKPPPEPKSHSRQAS  
TDAGSGGVLTPHHVRAHSSPASLQLGAVSGGSLSGMASAGASPQHLRQSSYEIPDDAPLPAGWEMAKTASGQRYF  
LNHIDQTTTWQDPRKALLQMNQPPPPSSVPPVQQLNLMNPASGPLEGWEQAITSEGEIYYINHKNKTTSWLDPR  
EPRYALNQQRITQSAPVKQGGQLPPSHSAVMGGNNQLRLQOIEKERLRLKQOELLRQRPELALRNQLPTSMQ  
DGSTNPVSSPMAQDARTMTANSSDPFLNSGTYHSRDESTDSGLSMSYSVPRTPDDFLNSVDEMDTGDPLPTSM  
TQPSRFPDYLDIAPGTDVLDLGTLEGESMAVEGEELMPSLQEQALSSDILNDMESVLAATKIDKESFLTWL  
PMRMRKLPDSFFKPP

rs:XP\_014482249 [XP\_014482249] PREDICTED: transcriptional coactivator YAP1 [*Dinoponera quadriceps*]. 45..59

MALNQDQDQLTKNLVVRIDQNSESDLQALFDSVLKPDSSRPLQVPLRMRKLPDSFFNPPSTGSKSPSIS  
HSRENSADSAFGTAAAATAATPSNPGAGGSAPNSSANGSGGGAGAAAAAAGLTVAHRAHSSPASLQQTY  
ASAQQAPQHAPQPHARHHHQQORSYDVISTVDDLGLPLPHGWEQARTPEGQIYFLNHLTRTTTWEDPRKTAAAN  
VAAVAAVESGKSNNGTLGLPLPDGWEQARTPEGEIYFINHQTRTTSWFDPRIPHTLQRAPTSGAMLPQSWLQOQPT  
GGGIQSNQSMQACQOKLRLQSLQMERERLQQRQOEIMRQOELMLRQTTTEPMDPFLSGINEQHARQESADSGLGL  
GSAYSLPHTPEDFLANIDNMDGTSDGGAPMETPDLSTLSDNIDSTDDLPLSLQSEDFSSDILDDVQSLINPNT  
TKPENVLTLW PLRMRKLPDSFFNPP

rs:XP\_014598034 [XP\_014598034] PREDICTED: transcriptional coactivator YAP1-like [*Polistes canadensis*]. 47..61

MALNQEIDQLSNSSNLVVRIDQNSESDLQALFDTVLKPDSPKHPLQVPLRMRNLPSFFNPPSTGSRSPS  
ISHSRENSADSAFGSSGASGAVTGTGGRNAESSGGGGNVVTGGANVSVVGGGAGGGAGAGGSVGTNGGGGG  
PAGGGSPGGGAGGVVAVAAGTNNVNGGNTGGGGAGATVNNGGPPPGPAGVPAGTAASASAVNGPAPAAAAA  
AAAAAAGLTVAHRAHSSPASLQQTYASAQQAQHAPQPHARHHHQQORSYDVISTVDDLGLPLPHGWE  
QARTTEGQIYFLNHLTRTTTWEDPRKTVAQAQVAAQVESGKAAAAGNTLGLPLPDGWEQARTPEGEIYFINHQ  
TRTTSWFDPRIPHTLQRAPSSGAMLPQNWLOQPTAGGIPNNQSLQVCQOKLRLQSLQMERERLQQRQOEIMRQOE  
LMLRQTTTEAAMPFLSGISEQHARQESADSGLGLGSAYSLPHTPEDFLANIDNMDGTSDGGAPMETPDLSTLS  
DNIDSTDDLVPSSLQSEDFSSDILEDVQCFISPNTIKPGNVLTWL PLRMRNLPSFFNPP

rs:XP\_014640698 [XP\_014640698] PREDICTED: transcriptional coactivator YAP1 isoform X1 [*Ceratotherium simum simum*]. 85..99

MDPGQQPPQSAPOGQQAQPPQGGPPSGSQAPPQQAAPQAPPAGHQIVHVRGDSETDLEALF

NAVMNPKTANVPQTVPMRLRKLKLPDSFFKPPPEPKSHSRQASTDAGTAGALTPQHVRHSSPASLQLGAVSPGTLTP  
TGVVSGPAATPAAQHLRQSSFEIPDDVPLPAGWEMAKTSSGQRYFLNHIDQTTTQDPRKAMLSQMNVTTPTSPP  
VQQNMMNSASGPLPDGWEQAMTQDGEIYYINHKNKTTSWLDPRLDPRFGKAMNQRISQSAPVKQPPPLAPQSPQG  
GVMGSGNSNQOQMRLQQLQMEKERLRLKQOELLRQVRPQAMRNINPSTANSPKCQELALRSQLPTLEQDGGTQN  
PVSSPGMSQELRTMTTNSSDPFLNSGTYSRDESTDSGLSMSSYSVPRTPDDFLNSVDEMDTGDITINQSTLPSQQ  
NRFPDYLEAIPGTNVDLGTLEGDGMNIEGEELMPSLQEQALSSDILNDMESVLAATKLDKESFLTWL  
PMRLRKLKLPDSFFKPP

rs:XP\_014640699 [XP\_014640699] PREDICTED: transcriptional coactivator  
YAP1 isoform X2 [Ceratootherium simum simum]. 85..99

MDPGQQPPQPSAPQGGQAPAQPPQGQPPSGSGQQAPPGSQAAPQAPPAGHQIVHVRGDSETDLEALF  
NAVMNPKTANVPQTVPMRLRKLKLPDSFFKPPPEPKSHSRQASTDAGTAGALTPQHVRHSSPASLQLGAVSPGTLTP  
TGVVSGPAATPAAQHLRQSSFEIPDDVPLPAGWEMAKTSSGQRYFLNHIDQTTTQDPRKAMLSQMNVTTPTSPP  
VQQNMMNSASGPLPDGWEQAMTQDGEIYYINHKNKTTSWLDPRLDPRFAMNQRISQSAPVKQPPPLAPQSPQGV  
MGSGNSNQOQMRLQQLQMEKERLRLKQOELLRQVRPQAMRNINPSTANSPKCQELALRSQLPTLEQDGGTQNPV  
SSPGMSQELRTMTTNSSDPFLNSGTYSRDESTDSGLSMSSYSVPRTPDDFLNSVDEMDTGDITINQSTLPSQQNR  
FPDYLEAIPGTNVDLGTLEGDGMNIEGEELMPSLQEQALSSDILNDMESVLAATKLDKESFLTWL  
PMRLRKLKLPDSFFKPP

rs:XP\_014640700 [XP\_014640700] PREDICTED: transcriptional coactivator  
YAP1 isoform X3 [Ceratootherium simum simum]. 85..99

MDPGQQPPQPSAPQGGQAPAQPPQGQPPSGSGQQAPPGSQAAPQAPPAGHQIVHVRGDSETDLEALF  
NAVMNPKTANVPQTVPMRLRKLKLPDSFFKPPPEPKSHSRQASTDAGTAGALTPQHVRHSSPASLQLGAVSPGTLTP  
TGVVSGPAATPAAQHLRQSSFEIPDDVPLPAGWEMAKTSSGQRYFLNHIDQTTTQDPRKAMLSQMNVTTPTSPP  
VQQNMMNSASGPLPDGWEQAMTQDGEIYYINHKNKTTSWLDPRLDPRFGKAMNQRISQSAPVKQPPPLAPQSPQG  
GVMGSGNSNQOQMRLQQLQMEKERLRLKQOELLRQVRPQAMRNINPSTANSPKCQELALRSQLPTLEQDGGTQNPVSS  
PGMSQELRTMTTNSSDPFLNSGTYSRDESTDSGLSMSSYSVPRTPDDFLNSVDEMDTGDITINQSTLPSQQNRFP  
DYLEAIPGTNVDLGTLEGDGMNIEGEELMPSLQEQALSSDILNDMESVLAATKLDKESFLTWL  
PMRLRKLKLPDSFFKPP

rs:XP\_004427460 [XP\_004427460] PREDICTED: transcriptional coactivator  
YAP1 isoform X4 [Ceratootherium simum simum]. 85..99

MDPGQQPPQPSAPQGGQAPAQPPQGQPPSGSGQQAPPGSQAAPQAPPAGHQIVHVRGDSETDLEALF  
NAVMNPKTANVPQTVPMRLRKLKLPDSFFKPPPEPKSHSRQASTDAGTAGALTPQHVRHSSPASLQLGAVSPGTLTP  
TGVVSGPAATPAAQHLRQSSFEIPDDVPLPAGWEMAKTSSGQRYFLNHIDQTTTQDPRKAMLSQMNVTTPTSPP  
VQQNMMNSASGPLPDGWEQAMTQDGEIYYINHKNKTTSWLDPRLDPRFAMNQRISQSAPVKQPPPLAPQSPQGV  
MGSGNSNQOQMRLQQLQMEKERLRLKQOELLRQVRPQAMRNINPSTANSPKCQELALRSQLPTLEQDGGTQNPVSSPG  
MSQELRTMTTNSSDPFLNSGTYSRDESTDSGLSMSSYSVPRTPDDFLNSVDEMDTGDITINQSTLPSQQNRFPDY  
LEAIPGTNVDLGTLEGDGMNIEGEELMPSLQEQALSSDILNDMESVLAATKLDKESFLTWL  
PMRLRKLKLPDSFFKPP

rs:XP\_014640701 [XP\_014640701] PREDICTED: transcriptional coactivator  
YAP1 isoform X5 [Ceratootherium simum simum]. 85..99

MDPGQQPPQPSAPQGGQAPAQPPQGQPPSGSGQQAPPGSQAAPQAPPAGHQIVHVRGDSETDLEALF  
NAVMNPKTANVPQTVPMRLRKLKLPDSFFKPPPEPKSHSRQASTDAGTAGALTPQHVRHSSPASLQLGAVSPGTLTP  
TGVVSGPAATPAAQHLRQSSFEIPDDVPLPAGWEMAKTSSGQRYFLNHIDQTTTQDPRKAMLSQMNVTTPTSPP  
VQQNMMNSASGPLPDGWEQAMTQDGEIYYINHKNKTTSWLDPRLDPRFGKAMNQRISQSAPVKQPPPLAPQSPQG  
GVMGSGNSNQOQMRLQQLQMEKERLRLKQOELLRQVRPQELALRSQLPTLEQDGGTQNPVSSPGMSQELRTMTT  
NSSDPFLNSGTYSRDESTDSGLSMSSYSVPRTPDDFLNSVDEMDTGDITINQSTLPSQQNRFPDYLEAIPGTNVD  
LGTLEGDGMNIEGEELMPSLQEQALSSDILNDMESVLAATKLDKESFLTWL PMRLRKLKLPDSFFKPP

rs:XP\_014640702 [XP\_014640702] PREDICTED: transcriptional coactivator  
YAP1 isoform X6 [Ceratootherium simum simum]. 85..99

MDPGQQPPQPSAPQGGQAPAQPPQGQPPSGSGQQAPPGSQAAPQAPPAGHQIVHVRGDSETDLEALF  
NAVMNPKTANVPQTVPMRLRKLKLPDSFFKPPPEPKSHSRQASTDAGTAGALTPQHVRHSSPASLQLGAVSPGTLTP  
TGVVSGPAATPAAQHLRQSSFEIPDDVPLPAGWEMAKTSSGQRYFLNHIDQTTTQDPRKAMLSQMNVTTPTSPP  
VQQNMMNSASGPLPDGWEQAMTQDGEIYYINHKNKTTSWLDPRLDPRFAMNQRISQSAPVKQPPPLAPQSPQGV  
MGSGNSNQOQMRLQQLQMEKERLRLKQOELLRQVRPQELALRSQLPTLEQDGGTQNPVSSPGMSQELRTMTTNS

SDPFLNSGTYHSRDESTDSGLSMSSYSVPRTPDDFLNSVDEMMDTGDITINQSTLPSQQNRFPDYLEAIPGTNVDLG  
TLEGDMNIEGEEELMPSLQEQALSSDILNDMESVLAATKLDKESFLTWL PMRLRKLPSDFFKPP

rs:XP\_014640703 [XP\_014640703] PREDICTED: transcriptional coactivator  
YAP1 isoform X7 [Ceratotherium simum simum]. 85..99

MDPGQQPPQSAPOGQQAQPPQGGPPSGSQAPPQAGHQIVHVRGDSETDLEALF  
NAVMPKTANVPQTVPMRLRKLPSDFFKPPEPKSHSRQASTDAGTAGALTPQHVRHSSPASLQLGAVSPGTLTP  
TGVVSGPAATPAAQHLRQSSFEIPDDVPLPAGWEMAKTSSGQRYFLNHIDQTTTWQDPRKAMLSQMNVTTPTSPP  
VQQNMMNSASGPLPDGWEQAMTQDGEIYYINHKNTTSWLDPRLDPRFQKAMNQRISQSAPVKQPPPLAPQSPQG  
GVMGSGNSNQQQMRLQQLQMEKERLRLKQEQELLRQELALRSQLPTLEQDGGTQNPVSSPGMSQELRTMTTNSSD  
PFLNSGTYHSRDESTDSGLSMSSYSVPRTPDDFLNSVDEMMDTGDITINQSTLPSQQNRFPDYLEAIPGTNVDLGT  
EGDMNIEGEEELMPSLQEQALSSDILNDMESVLAATKLDKESFLTWL PMRLRKLPSDFFKPP

rs:XP\_004427461 [XP\_004427461] PREDICTED: transcriptional coactivator  
YAP1 isoform X8 [Ceratotherium simum simum]. 85..99

MDPGQQPPQSAPOGQQAQPPQGGPPSGSQAPPQAGHQIVHVRGDSETDLEALF  
NAVMPKTANVPQTVPMRLRKLPSDFFKPPEPKSHSRQASTDAGTAGALTPQHVRHSSPASLQLGAVSPGTLTP  
TGVVSGPAATPAAQHLRQSSFEIPDDVPLPAGWEMAKTSSGQRYFLNHIDQTTTWQDPRKAMLSQMNVTTPTSPP  
VQQNMMNSASGPLPDGWEQAMTQDGEIYYINHKNTTSWLDPRLDPRFAMNQRISQSAPVKQPPPLAPQSPGGV  
MGSGNSNQQQMRLQQLQMEKERLRLKQEQELLRQELALRSQLPTLEQDGGTQNPVSSPGMSQELRTMTTNSSDPF  
LNSGTYHSRDESTDSGLSMSSYSVPRTPDDFLNSVDEMMDTGDITINQSTLPSQQNRFPDYLEAIPGTNVDLGT  
LEGDMNIEGEEELMPSLQEQALSSDILNDMESVLAATKLDKESFLTWL PMRLRKLPSDFFKPP

rs:XP\_014640704 [XP\_014640704] PREDICTED: transcriptional coactivator  
YAP1 isoform X9 [Ceratotherium simum simum]. 85..99

MDPGQQPPQSAPOGQQAQPPQGGPPSGSQAPPQAGHQIVHVRGDSETDLEALF  
NAVMPKTANVPQTVPMRLRKLPSDFFKPPEPKSHSRQASTDAGTAGALTPQHVRHSSPASLQLGAVSPGTLTP  
TGVVSGPAATPAAQHLRQSSFEIPDDVPLPAGWEMAKTSSGQRYFLNHIDQTTTWQDPRKAMLSQMNVTTPTSPP  
VQQNMMNSASAMNQRISQSAPVKQPPPLAPQSPGGVGMGSGNSNQQQMRLQQLQMEKERLRLKQEQELLRQVRPQ  
AMRNINPSTANSKQELALRSQLPTLEQDGGTQNPVSSPGMSQELRTMTTNSSDPFLNSGTYHSRDESTDSGLS  
MSSYSVPRTPDDFLNSVDEMMDTGDITINQSTLPSQQNRFPDYLEAIPGTNVDLGTLEGDMNIEGEEELMPSLQEQAL  
SSDILNDMESVLAATKLDKESFLTWL PMRLRKLPSDFFKPP

rs:XP\_014640705 [XP\_014640705] PREDICTED: transcriptional coactivator  
YAP1 isoform X10 [Ceratotherium simum simum]. 85..99

MDPGQQPPQSAPOGQQAQPPQGGPPSGSQAPPQAGHQIVHVRGDSETDLEALF  
NAVMPKTANVPQTVPMRLRKLPSDFFKPPEPKSHSRQASTDAGTAGALTPQHVRHSSPASLQLGAVSPGTLTP  
TGVVSGPAATPAAQHLRQSSFEIPDDVPLPAGWEMAKTSSGQRYFLNHIDQTTTWQDPRKAMLSQMNVTTPTSPP  
VQQNMMNSASAMNQRISQSAPVKQPPPLAPQSPGGVGMGSGNSNQQQMRLQQLQMEKERLRLKQEQELLRQAMRN  
INPSTANSKQELALRSQLPTLEQDGGTQNPVSSPGMSQELRTMTTNSSDPFLNSGTYHSRDESTDSGLSMSSY  
SVPRTPDDFLNSVDEMMDTGDITINQSTLPSQQNRFPDYLEAIPGTNVDLGTLEGDMNIEGEEELMPSLQEQALSSDI  
LNDMESVLAATKLDKESFLTWL PMRLRKLPSDFFKPP

rs:XP\_014640706 [XP\_014640706] PREDICTED: transcriptional coactivator  
YAP1 isoform X11 [Ceratotherium simum simum]. 85..99

MDPGQQPPQSAPOGQQAQPPQGGPPSGSQAPPQAGHQIVHVRGDSETDLEALF  
NAVMPKTANVPQTVPMRLRKLPSDFFKPPEPKSHSRQASTDAGTAGALTPQHVRHSSPASLQLGAVSPGTLTP  
TGVVSGPAATPAAQHLRQSSFEIPDDVPLPAGWEMAKTSSGQRYFLNHIDQTTTWQDPRKAMLSQMNVTTPTSPP  
VQQNMMNSASAMNQRISQSAPVKQPPPLAPQSPGGVGMGSGNSNQQQMRLQQLQMEKERLRLKQEQELLRQVRPQ  
ELALRSQLPTLEQDGGTQNPVSSPGMSQELRTMTTNSSDPFLNSGTYHSRDESTDSGLSMSSYSVPRTPDDFLNS  
VDEMMDTGDITINQSTLPSQQNRFPDYLEAIPGTNVDLGTLEGDMNIEGEEELMPSLQEQALSSDILNDMESVLAATK  
LDKESFLTWL PMRLRKLPSDFFKPP

rs:XP\_004427462 [XP\_004427462] PREDICTED: transcriptional coactivator  
YAP1 isoform X12 [Ceratotherium simum simum]. 85..99

MDPGQQPPQSAPOGQQAQPPQGGPPSGSQAPPQAGHQIVHVRGDSETDLEALF  
NAVMPKTANVPQTVPMRLRKLPSDFFKPPEPKSHSRQASTDAGTAGALTPQHVRHSSPASLQLGAVSPGTLTP  
TGVVSGPAATPAAQHLRQSSFEIPDDVPLPAGWEMAKTSSGQRYFLNHIDQTTTWQDPRKAMLSQMNVTTPTSPP  
VQQNMMNSASAMNQRISQSAPVKQPPPLAPQSPGGVGMGSGNSNQQQMRLQQLQMEKERLRLKQEQELLRQELAL

RSQLPTLEQDGGTQNPVSSPGMSQELRTMTTNSSDPFLNSGTYHSRDESTDSGLSMSSYSVPRTPDDFLNSVDEM  
DTGDTINQSTLPSQQNRFPDYLEAIPGTNVDLGTLEGDGMNIEGELMPSLQEQALSSDILNDMESVLAATKLDKE  
SFLTWL PMRLRKLPSFFKPP

rs:XP\_004434215 [XP\_004434215] PREDICTED: protein **FAM181B** [Ceratotherium  
simum simum]. 17..31

MLALPAGSPLETLSKVPLRARNLPPSFFTEPSRAGGGGCGPSGPVVSLGDLEKGAEEVEFFELLGPDYG  
TGTEAGVLLAAEPLDVFTGAAALRGPELEPGLFEPSPGMVGSLLYPEPWSAPGCPSTKKPPLAAPRGGLTLNE  
HLRPLYPAAADSPGGEDGPGLLASFAFFSDCALPAPPPHQVSYDYSAGYGRYSSSLWRPDGVWEGAPGEEGA  
HRD PLRARNLPPSFFTEP

rs:XP\_004434284 [XP\_004434284] PREDICTED: protein **FAM181A** isoform X1  
[Ceratotherium simum simum]. 228..242

MLCIWRGAPDWPEGPPSSGSDSVSIQPTRGLHHRFQPDARSSPAAPGLAQVCGREPAGPRWWGPGPGART  
LGPLCALLWSSQTLQNLSSWKAPCSGLAMASDSDVKMLLNFNVLASSDIKAALDKSAPCRRSVDHRKYLQKQL  
KRFSQKYSRLPRGLPGRGAEPHLRRGPEDRPGRLPLDSGQDSSPGGGGCKEKALGNPYREECLSKEQTLQGQNP  
EAARPGQVPMRKRQLPASFWEEPRTHTSYPLGLEGLGREGAPYEGKKPCKGLEPMGPELAPVPTSPRAPAEKE  
PLKMPGVTLVGRVNAWNYCPLQYHGQPIYPGPPAALPQSSVPSLGLWRKSPASPGELAHFCKDVDSPGQKVYRVP  
VLKPIPTKPAMPPPIFNVFGYL PMRKRQLPASFWEEP

rs:XP\_014645997 [XP\_014645997] PREDICTED: protein **FAM181A** isoform X2  
[Ceratotherium simum simum].>rs:XP\_014645998 [XP\_014645998] PREDICTED:  
protein **FAM181A** isoform X2 [Ceratotherium simum simum]. 129..143

MASDSDVKMLLNFNVLASSDIKAALDKSAPCRRSVDHRKYLQKQLKRFSQKYSRLPRGLPGRGAEPHLR  
RGPEDRPGRLPLDSGQDSSPGGGGCKEKALGNPYREECLSKEQTLQGQNPAAARPGQVPMRKRQLPASFWEEP  
RTHSYPLGLEGLGREGAPYEGKKPCKGLEPMGPELAPVPTSPRAPAEKEPLKMPGVTLVGRVNAWNYCPLQYH  
GQPIYPGPPAALPQSSVPSLGLWRKSPASPGELAHFCKDVDSPGQKVYRVPVLKPIPTKPAMPPPIFNVFGYL  
PMRKRQLPASFWEEP

rs:XP\_014669587 [XP\_014669587] PREDICTED: transcriptional coactivator  
YAP1-like isoform X1 [Priapulus caudatus]. 38..52

MEPKKGTVIHVRGDSSELEALFKVALSPDPKNHSLPMRNRKLPESFWKPPETGSRSCNHSRESSTDS  
THLMRAPPVGLVSSHSRAQSSPASMQQSQLSTPQTPPHHSQHIRQHSEIPDHIPLPPGWEVATMPKTGQRYFIKN  
KEQQIRLRDGTGMQYRLGSPRNSVFPKRSHIEKSTTWTDPRLKYYSNMQTGTTLEPLPGGWEQATTEAGETYIN  
HINRTTSWFDPRQLQPSMHAQRAGGPGGPHLPPQLQQQPASQIPTSVGGNLPHLSPQARQQNLRLQSLQMERERL  
RQRQQEIFRQVVGSTQKPKQSAVHEPPACHNQEMMLRNHLGGEERSTPVSTTVTGVVDPFLGSGGEYHARQESADSG  
LELGTNYSLPRTPEDFLGNVDEMDTSDGNQSQNPQQHSRVPPDFLDSMQGTNVDLGGLESTTAGTNMESDDLVP  
LDINSDLLGDVEAVLNNNKIDNLLTWL PMRNRKLPESFWKPP

rs:XP\_014669593 [XP\_014669593] PREDICTED: transcriptional coactivator  
YAP1-like isoform X2 [Priapulus caudatus]. 38..52

MEPKKGTVIHVRGDSSELEALFKVALSPDPKNHSLPMRNRKLPESFWKPPETGSRSCNHSRESSTDS  
THLMRAPPVGLVSSHSRAQSSPASMQQSQLSTPQTPPHHSQHIRQHSEIPDHIPLPPGWEVATMPKTGQRYFIKN  
KEQQIRLRDGTGMQYRLGSPRNSVFPKRSHIEKSTTWTDPRLKYYSNMQTGTTLEPLPGGWEQATTEAGETYIN  
HINRTTSWFDPRQLQPSMHAQRAGGPGGPHLPPQLQQQPASQIPTSVGGNLPHLSPQARQQNLRLQSLQMERERL  
RQRQQEIFRQEMMLRNHLGGEERSTPVSTTVTGVVDPFLGSGGEYHARQESADSGLELGTNYSLPRTPEDFLGNV  
DEMDTSDGNQSQNPQQHSRVPPDFLDSMQGTNVDLGGLESTTAGTNMESDDLVP  
LDINSDLLGDVEAVLNNNKIDNLLTWL PMRNRKLPESFWKPP

rs:XP\_014669600 [XP\_014669600] PREDICTED: transcriptional coactivator  
YAP1-like isoform X3 [Priapulus caudatus]. 38..52

MEPKKGTVIHVRGDSSELEALFKVALSPDPKNHSLPMRNRKLPESFWKPPETGSRSCNHSRESSTDS  
THLMRAPPVGLVSSHSRAQSSPASMQQSQLSTPQTPPHHSQHIRQHSEIPDHIPLPPGWEVATMPKTGQRYFINH  
IEKSTTWTDPRLKYYSNMQTGTTLEPLPGGWEQATTEAGETYINHINRTTSWFDPRQLQPSMHAQRAGGPGGPH  
LPPQLQQQPASQIPTSVGGNLPHLSPQARQQNLRLQSLQMERERLRQRQQEIFRQVVGSTQKPKQSAVHEPPACHNQ  
EMMLRNHLGGEERSTPVSTTVTGVVDPFLGSGGEYHARQESADSGLELGTNYSLPRTPEDFLGNVDEMDTSDGNQ  
SQNPQQHSRVPPDFLDSMQGTNVDLGGLESTTAGTNMESDDLVP  
LDINSDLLGDVEAVLNNNKIDNLLTWL PMRNRKLPESFWKPP

rs:XP\_014665935 [XP\_014665935] PREDICTED: atrophin-1-like [Priapulus caudatus]. 128..142

MHVATSLSPVGDAGDPVSEETVALLQFIDEVSVSMKTVLDRPTKPRKKVNHRKYLQKQLRRCGAVVHAV  
VATPTEKPPDKIPASVGVSSAGGSSSSSRSKLLDALFDPKTVHEKCCATRRRVGAKMPLRSRNLPAFFVEPRC  
ADDDVGGQOPTNATHPMPTTTTGGGERANGVVRWWQSSPDASACDVGAPLGYGLTGLADEEANRECAPYFYGDGL  
APNHVGVGAPGVGHYFGQVALAAQQSAYTELHHHHHHQQQQQQQQQQQEEEQMSNKIGIACGGAEYRGVAP  
PARVSHLDTSAAAAAAVALTLHAVDRHAVYDQPQQSSPHSSCSSPRYQVTSAAPHLADVTAYHRPTPDAMSPPS  
HLADVTSYHQPTAMSAHLYPSLSLDGLHHEFPANQSTMPMSMDSTERLRHYDGLAAVQPLPAFPDVFPTTQRPEQH  
RRLMQTTM PLRSRNLPAFFVEP

rs:XP\_022361307 [XP\_022361307] protein **FAM181A** [Enhydra lutris kenyonii].>tr:A0A2Y9JJY7\_ENHLU [A0A2Y9JJY7] SubName: Full=protein **FAM181A** {ECO:0000313|RefSeq:XP\_022361307.1}; 129..143

MASDSVDMKLLNFVNLASSDIKAALDKSAPCRRSVDHRKYLQKQLKRFSSQKYSRLPRGLPGRGTPEHLK  
RGPEDQPGRLLLDPGHSSPGVVGCKEALGNPYREECLSKEQTLQRQNPAAARPGQVPMRKRQLPASFWEEP  
PHTSYSLGLELGPREGSPYEGKKHCKGLEPLDPEMAPVPASPRAPAGKEPLKMSGVSLVGRVNAWGCCPFQYH  
GQPIYAGPPGALPQSPVPSLGLWRKSPASPGELAHFCKDVGDPGQKVYRPVVLKPIPTKPAVPPPIFNVFGYL  
PMRKRQLPASFWEEP

rs:XP\_022369806 [XP\_022369806] protein **FAM181B** [Enhydra lutris kenyonii].>tr:A0A2Y9K8P3\_ENHLU [A0A2Y9K8P3] SubName: Full=protein **FAM181B** {ECO:0000313|RefSeq:XP\_022369806.1}; 221..235

MAVQAALLSTHPFVFFGFGGSPDGLGGAFGALDKGCCFEDDETGTTPAGALLAGAEGGDVREATRDLLSF  
IDSASSNIKLALDKPGKSKRKNHRKYLQKQIKRCSGLMGTAPPGPPSPGAADTPAKRPLAAPGAQTVAVPPHGK  
AAPPREASQAAAAASLQSRSLAALFDSLHRVPGGDERAGGSVAARVAGLGGASAGGSGGDAAGSAGGTAVPGARK  
VPLRARNLPPSFFTEPSRAGGSGCGPSGPGVSLGDLEKGAEEFFELLGPDYAGTEASVLLAAEPLDVFPFTA  
AVLRGPPPELEPGLFEPPEPAMVGSLLYSESWAPGCPPTKKPLAAPRGGLTLNEPLRPLYPTAADSPPGGEDAPGL  
LASFAPFFSDCALPPPPPHQVSYDYSAGYSRTAYSSLWRPDGVWEGAPGEEGAHRD PLRARNLPPSFFTEP

rs:XP\_022694835 [XP\_022694835] transcriptional coactivator YAP1-A-like isoform X1 [Varroa jacobsoni].>rs:XP\_022643709 [XP\_022643709] transcriptional coactivator YAP1-A-like isoform X1 [Varroa destructor]. 43..57

MATEGFLEQQGNHIVRIRQDQNLDELKVAIEGGATKTGQLPMRMRNLPPSFFQQAEGATALSQOIA  
KPVVNHSSRAHSSPASLEQTYRSAPQQPTHARQQSYDLVDEPLPPGWQMMRTSIGORYLNHETHTTTWEDPRKK  
LNGQVRATQRATAPPPHTTNPVINAETLGLPLAGWEQRTTSDGEVYFLNHNRRTTSWFDPRIPTHLQKAEYMA  
RQATQGAASSSGDVQTMESQNHVTPGLHSPGNSHNKLDAGSTDSINAVCAATSSLSLQQQIQQLQMORIQQ  
LELERERMKLRQQEILRQPAFGLSTNEPNNNTVVVNPQLGVNSSLTDAFLGGPHSRQESADSGLGLGNFSLPP  
EEFLNSIDSTTGTSSLTSTNNNNTPNISIAGMDDSSLDAMGGGVGVGGGGAVGGPEQMSDDLVPVSLNEMPDLLPD  
MEALLSDNKDSVLTWL PMRMRNLPPSFFQQP

rs:XP\_014836471 [XP\_014836471] PREDICTED: protein **FAM181B** [Poecilia mexicana].>rs:XP\_007572434 [XP\_007572434] PREDICTED: protein **FAM181B** [Poecilia formosa]. 246..260

MQVVGHKQRVKFPGFPSLLLLFDVLTSSVLPPERSPSSSSVPTSSLDCLWKLHEQHQEQVFIIRRTKSCF  
EETFSSGITVDATGVAAGLDRVMAVQTAIMNPQFMSFCFPDSVMEYDVEKSLDGSLLCEAENDEDFKETTRDLS  
FIDSASSNIKLALDKPVKSKRKNHRKYLQKQIKRGTGIITPGNTSEAPVKRQGSPPVSSQQGPLQSKTLQKREGGQ  
ANLQSKSLAALFSPVKEIRGEKAKKPPMRHRNLPPSFFTEPANCSRVSSTSGMTLKDLEGRNPEAADFFELLGPD  
YSNMVNEQDIYQGVPLRGQPDGLGDPASYDHLVGLLYTEPWTNCSGPKCKPSEGLRTGPPQPPVYSQAEDTSV  
PLDDNGLCTLTFPNFFPDCSISQVTYDLNGGYNKTNFSCS PMRHRNLPPSFFTEP

rs:XP\_014848256 [XP\_014848256] PREDICTED: transcriptional coactivator YAP1-like isoform X1 [Poecilia mexicana].>rs:XP\_014848266 [XP\_014848266] PREDICTED: transcriptional coactivator YAP1-like isoform X1 [Poecilia mexicana].>rs:XP\_007556451 [XP\_007556451] PREDICTED: transcriptional coactivator YAP1-like isoform X1 [Poecilia formosa]. 46..60

MDAHRGAPPAGQQVVHVRGDSNTELEALFNAVMPGKAARQTQSVPMRMRKFPDSFFKPPPEPRGHSRQA  
SSDGGVCGSLAPHHVRAHSSPASLPINSVNVAATPVIIPDDVPLPEDWEMAKTPTGQRYFINHAQRSTTWQDPRLS  
QLQSAQAQHQIACTPSHAHSFNSNPAPTTQPKNIIPETGPLPKGWEQAVTAEGEVYIDHIKQETTWDDPRLAPKV

NPAGLPLAIQQRLEKLRLKHPVPPQFAPQVQEAGGSNQMPGGMDHRSQAQMLVPSVDIRIRALNQESNLNGAHSR  
NESTDSGLSVSSLSRSDHMLSSVDHMDTGIGDSSEPPSMGLQESMPVLPINEELMSGIPDSLTSMDMLMEMDVTLS  
SGPHMDRDSLLTTLW PMRMRKFPDSFFKPP

rs:XP\_014848272 [XP\_014848272] PREDICTED: transcriptional coactivator  
YAP1-like isoform X2 [Poecilia mexicana].>rs:XP\_007556460 [XP\_007556460]  
PREDICTED: transcriptional coactivator YAP1-like isoform X2 [Poecilia  
formosa].>tr:A0A096MBE9\_POEFO [A0A096MBE9] SubName: Full=Uncharacterized  
protein {ECO:0000313|Ensembl:ENSPFOP00000028740}; 46..60

MDAHRGAPPAGQQVVHVRGDSNTELEALFNAVMPGKAARQTQSVPMRMRKFPDSFFKPPPEPRGHSRQA  
SSDGGVCGSLAPHHVRAHSSPASLPINSVNVAATPVIPDDVPLPEDWEMAKTPTGQRYFINHAQRSTTWQDPRLS  
QLQSAQAQHQIACPTPSHAHSFSNPAPTTQPKNIIPETGPLPKGWQAVTAEGEVYYIDHIKQETTWDPRLPAPKV  
NPAGLPLAIQQRLEKLRLKHPVPPQFAPQVQEAGGSNQMPGGMDHRSQAQMLVPSVDIRIRALNQESNLNGAHSR  
NESTDSGLSVSSLSRSDHMLSSVDHMDTGIGDSSEPPSMGLQESMPVLPINEELMSGIPDSLTSMDMLMEMDVTLSG  
PHMDRDSLLTTLW PMRMRKFPDSFFKPP

rs:XP\_014848279 [XP\_014848279] PREDICTED: transcriptional coactivator  
YAP1-like isoform X3 [Poecilia mexicana].>rs:XP\_007556469 [XP\_007556469]  
PREDICTED: transcriptional coactivator YAP1-like isoform X3 [Poecilia  
formosa]. 46..60

MDAHRGAPPAGQQVVHVRGDSNTELEALFNAVMPGKAARQTQSVPMRMRKFPDSFFKPPPEPRGHSRQA  
SSDGGVCGSLAPHHVRAHSSPASLPINSVNVAATPVIPDDVPLPEDWEMAKTPTGQRYFINHAQRSTTWQDPRLS  
QLQSAQAQHQIACPTPSHAHSFSNPAPTTQPKNIIPETAPKVNPAAGLPLAIQQRLEKLRLKHPVPPQFAPQVQEAG  
GSNQMPGGMDHRSQAQMLVPSVDIRIRALNQESNLNGAHSRNESTDSGLSVSSLSRSDHMLSSVDHMDTGIGDS  
SEPPSMGLQESMPVLPINEELMSGIPDSLTSMDMLMEMDVTLSGPHMDRDSLLTTLW PMRMRKFPDSFFKPP

rs:XP\_014885914 [XP\_014885914] PREDICTED: protein **FAM181B** [Poecilia  
latipinna].>tr:A0A3B3UHT5\_9TELE [A0A3B3UHT5] SubName: Full=Family with  
sequence similarity 181 member B {ECO:0000313|Ensembl:ENSPLAP00000012177};  
246..260

MQVVGHKQRVKFPGFPLLLLLFDVLTSSVLPERSPSSSSVPTSSLDCLWKLHEQHQEQVFIIRRTKSCF  
EETFSSGITVDATGVAAGLDRVMAVQTAIMNPQFMSFCFPDSVMEYDVEKSLDGSLLCEAENDEDFKETTRDLLS  
FIDSASSNIKLALDKPVKSKRKNVHRKYLQKQIKRCTGIITPGNTSEAPVKRQGSPPVQQGPLQSKTLQKREGGQ  
ANLQSKSLAALFSPVKEIRGEKAKKPPMRHRNLPPSFFTEPANCSRVSSTSGMTLKDLEGRNPEAADFFELLGPD  
YSNMVNEQDIYQGVPLRGQPDGLGDPASYDHLVGGLLYTEPWTNCSGPKKPPSEGLRTGPPQPPVYSQAEDTSTV  
PLDDNGLCTLTFFPNFFPDCSISQVTYDLNGGYNKTNFSCS PMRHRNLPPSFFTEP

rs:XP\_014844608 [XP\_014844608] PREDICTED: transcriptional coactivator  
YAP1-like [Poecilia mexicana]. 45..59

MDPNQHNPAGHQIVHVRGDSQTDLELLFNVSVMNPKSSNPASLPMRMRNLPSFFKPPPEPKSHSRQAS  
TDAGSGGVLTTPHHVRAHSSPASLQLGAVSGGSLSGMASAGASPQHLRQSSYEIPDDVPLPAGWEMAKTTSQRYF  
LNHNKSTTWQDPRKALLQTSQPAPPSSVPPQNLMPANGPLPEHWEQAITSEGEIYYINHEKRTTSWLDPRL  
EPRYALNQQRMTQSAPGKQSQGLPPSTLGGVMAGNNQLRLQOIEKDRLRLQQRHPQVSHQFGLGAFISEGGDGRG  
TFPFCVL PMRMRNLPSFFKPP

rs:XP\_014900478 [XP\_014900478] PREDICTED: transcriptional coactivator  
YAP1-like isoform X1 [Poecilia latipinna].>rs:XP\_014900479 [XP\_014900479]  
PREDICTED: transcriptional coactivator YAP1-like isoform X1 [Poecilia  
latipinna]. 46..60

MDAHRGAPPAGQQIVHVRGDSNTELEALFNAVMPGKAARQTQSVPMRMRKFPDSFFKPPPEPRGHSRQA  
SSDGGVCGSLAPHHVRAHSSPASLPINSVNVAATPIIPDDVPLPEDWEMAKTPTGQRYFINHAQRSTTWQDPRLS  
QLQSAQAQHQIACPTPSHAHSFSNPAPTTQPKNIIPETGPLPKGWQAVTAEGEVYYIDHIKQETTWDPRLPAPKV  
NPAGLPLAIQQRLEKLRLKHPVPPQFAPQVQEAGGSNQMPGGMDHRSQAQMLVPSVDIRIRALNQESNLNGAHSR  
NESTDSGLSVSSLSRSDHMLSSVDHMDTGIGDSSEPPSMGLQESMPVLPINEELMSGIPDSLTSMDMLMEMDVTLS  
SGPHMDRDSLLTTLW PMRMRKFPDSFFKPP

rs:XP\_014900480 [XP\_014900480] PREDICTED: transcriptional coactivator  
YAP1-like isoform X2 [Poecilia latipinna].>tr:A0A3B3U0I4\_9TELE [A0A3B3U0I4]  
SubName: Full=Uncharacterized protein



{ECO:0000313|Ensembl:ENSPLAP00000006159}; 46..60

MDAHRGAPPAGQQIVHVRGDSNTELEALFNAVMPGKAARQTQSVPMRMRKFPDSFFKPPPEPRGHSRQA  
SSDGGVCGSLAPHHVRAHSSPASLPINSVNVAATPIIPDDVPLPEDWEMAKTPTGQRYFINHAQRSTTWQDPRLS  
QLQSAQAQHQAIACTPSHAHSFSNPAPTTQPKNIIPETGPLPKGWEQAVTAEGEVYYIDHIKQETTWDPRLPAPKV  
NPAGLPLAIQQRLEKLRLKHPVPPQFAPQVQEAGGSNQMPGGMDHRSQAQMLVPSVDIRIRALNQESNLNGAHSR  
NESTDSGLSVSSLSRSDHMLSSVDHMDTGDSSEPPSMGLQESMPVLPINEELMSGIPDSLTSDMLMEMDVLVLSG  
PHMDRDSLTLTWL PMRMRKFPDSFFKPP

rs:XP\_014900481 [XP\_014900481] PREDICTED: transcriptional coactivator  
YAP1-like isoform X3 [Poecilia latipinna]. 46..60

MDAHRGAPPAGQQIVHVRGDSNTELEALFNAVMPGKAARQTQSVPMRMRKFPDSFFKPPPEPRGHSRQA  
SSDGGVCGSLAPHHVRAHSSPASLPINSVNVAATPIIPDDVPLPEDWEMAKTPTGQRYFINHAQRSTTWQDPRLS  
QLQSAQAQHQAIACTPSHAHSFSNPAPTTQPKNIIPETAPKVNPAAGLPLAIQQRLEKLRLKHPVPPQFAPQVQEAG  
GSNQMPGGMDHRSQAQMLVPSVDIRIRALNQESNLNGAHSRNESTDSGLSVSSLSRSDHMLSSVDHMDTGIGDS  
SEPPSMGLQESMPVLPINEELMSGIPDSLTSDMLMEMDVLVLSGPHMDRDSLTLTWL PMRMRKFPDSFFKPP

rs:XP\_018414906 [XP\_018414906] PREDICTED: protein **FAM181A** [Nanorana  
parkeri]. 112..126

MASDNEVKTLNLFVNLASCDIKAALDKSAPCRRSVDHRKYLQKQLKRFSQKYSRLPRCHSGKSVELRKG  
LVERINLAARSKGLSEKVMDENAVGGACLRENSAEGRPDQVPMRKRQLPPSFWEPRPSTSLLEMPCPKLDLIL  
YKDRTSVTGTSLSSFENKLLKNTAAQETSQSPGPDKEAGKVPSTPLAGRVNVCSCCPLQYHGQQMLYHHSHGTL  
PPDPFAALALWSKSAAVPTVEIQHLCKDSGQRIYRHVVFKPIPTKPAMPASIFNVFGYI  
PMRKRQLPPSFWEPR

rs:XP\_018421209 [XP\_018421209] PREDICTED: protein **FAM181B** [Nanorana  
parkeri]. 157..171

MAVQAAIMNHFMPLYFPGSHVGFESYHEGVEFLGAVESAGDYKESKDLLTFINSASSNIKLALDKP  
VKSKRKVNHRKYLQKQIKRCTGMIVNGNTSQGSPKQLASPSSTSPQSYHCKPPPKRDTTQTNLQSKSLAALFDN  
TKEVRGERCKKVPLRNRNLPPSFFTEPANCSGLLPNSIATLKEMEKGSQETMEYFDLLDSDYNSLISEQEILQG  
ASVRIHQDITAEHSMYEPHLLNGILYSDPWNPCNLIKKSPVGTGASPNENFKCLPMPGTVFTSHGDSSSLPTGV  
EDNCSTLTSFTPCYSECSLPQMFYDCSSGYNRIGYPVL PLRNRNLPPSFFTEPR

rs:XP\_023272958 [XP\_023272958] protein **FAM181A** [Seriola lalandi  
dorsalis].>rs:XP\_022606209 [XP\_022606209] protein **FAM181A** [Seriola  
dumerili]. 104..118

MANADSEVKTLNLFVNLASSDIKAALDKSAPCRRSVDHRKYLQKQLKRFSQKYSRVPRCHTHRPAEYGC  
GRPVGTVGHQSVKVAEKASSDAQDVENVGSVAEQVPMRKRQLPASFWEEPKLTQTKREHSHLALKRSPASTSEGGE  
NEKRKRNYGNDAKATLSASSRRSSADKETLKLDLTSHHCVSVCGCCPFQYHGHQVLHSHIVVPHPPVGLWGKTAG  
TESERPEHPYQKIHTHVVKPIPTKPTVQSPIFSVFGFI PMRKRQLPASFWEEP

rs:XP\_023277281 [XP\_023277281] transcriptional coactivator YAP1-like  
isoform X1 [Seriola lalandi dorsalis]. 46..60

MDAHRGAPPAGQQIVHVRGDSQTELEALFSAVMNPASKATRQASLPMMRMRKLPDSFFRQPDPRGHSRQA  
SSDGGVCGSLTPHHVRAHSSPASLPVNSLSTQATDVAAPQIIPDDVPLPHGWEMAKTPAGQRYFLNHLDKTTTWH  
DPRLSQLQSAQAQHPIISGTPVHAHSLSNPAPTTQPNINPETGPLEGWEQAVTADGEVYYIDHINKTTAWVAPR  
LAQKMNPGILGLALQQRQEKERLRCKGLPPQITPQEAGGRNQMTGGMDHNRNAPTLPVPSLDVIRIRSSNHEPTLNG  
AHSRNESTDSGLSVSSLPRTSDHMLSSVDHMDTGDSGDNSSMTLQESMPVLPMSSEGEELMPCIEGLSSDLLMDM  
ETVLSGSHMDRDSLTLTWL PMRMRKLPDSFFRQP

rs:XP\_023277282 [XP\_023277282] transcriptional coactivator YAP1-like  
isoform X2 [Seriola lalandi dorsalis].>rs:XP\_022618503 [XP\_022618503]  
transcriptional coactivator YAP1-like isoform X2 [Seriola dumerili].  
46..60

MDAHRGAPPAGQQIVHVRGDSQTELEALFSAVMNPASKATRQASLPMMRMRKLPDSFFRQPDPRGHSRQA  
SSDGGVCGSLTPHHVRAHSSPASLPVNSLSTQATDVAAPQIIPDDVPLPHGWEMAKTPAGQRYFLNHLDKTTTWH  
DPRLSQLQSAQAQHPIISGTPVHAHSLSNPAPTTQPNINPETAQKMNPGILGLALQQRQEKERLRCKGLPPQITP  
QEAGGRNQMTGGMDHNRNAPTLPVPSLDVIRIRSSNHEPTLNGAHSRNESTDSGLSVSSLPRTSDHMLSSVDHMDTG  
DSGDNSSMTLQESMPVLPMSSEGEELMPCIEGLSSDLLMDMETVLSGSHMDRDSLTLTWL  
PMRMRKLPDSFFRQP

rs:XP\_014214486 [XP\_014214486] transcriptional coactivator yorkie isoform X1 [Copidosoma floridanum]. 49..63

MALNQDVGDTGSANKRNLEVRIDQNSESDLQALFDSVLKPKDKNRPLQVPLRMRNLPDSFFNPPSTGSKS  
PSISHSRENSADSAFGAGVLGGVNPAAVASGIVSNGSGSNGTTSPGATGQIQSAGLTIAHPRAHSSPASLQQTYA  
SAQQQSQHAPQPHSARHVHHQKQRSYDVISTVDDLGLPLPHGWEQARTPEGQIYYLNHITKTTTWEDPRKTAAAAA  
VAAVAAAAVESSKANNASAAVAAAAAANSALRPLPEGWEQARTPEGEIYFINHPARTTSWFDPRIPAHLQRAP  
LSGAMLPQSWQLQQQQQTATPGIQNNQTLQACQOKLRLQSLQMERERLQKQEQEIMRQVSSQELVMRQSTTDAAM  
DPFLSGINEQHARQESADSGGLGTAYPLNGPHTPEDFLANIDDNMDGTTEGAPMDTPDLSIDTTDDLVTSLQLG  
EDFSSDILEDVQSLINPNPTKPENILTWL PLRMRNLPDSFFNPP

rs:XP\_014214487 [XP\_014214487] transcriptional coactivator yorkie isoform X2 [Copidosoma floridanum]. 49..63

MALNQDVGDTGSANKRNLEVRIDQNSESDLQALFDSVLKPKDKNRPLQVPLRMRNLPDSFFNPPSTGSKS  
PSISHSRENSADSAFGAGVLGGVNPAAVASGIVSNGSGSNGTTSPGATGQIQSAGLTIAHPRAHSSPASLQQTYA  
SAQQQSQHAPQPHSARHVHHQKQRSYDVISTVDDLGLPLPHGWEQARTPEGQIYYLNHITKTTTWEDPRKTAAAAA  
VAAVAAAAVESSKANNASAAVAAAAAANSALRPLPEGWEQARTPEGEIYFINHPARTTSWFDPRIPAHLQRAP  
LSGAMLPQSWQLQQQQQTATPGIQNNQTLQACQOKLRLQSLQMERERLQKQEQEIMRQVSSQELVMRQSTTDAAM  
DPFLSGINEQHARQESADSGGLGTAYPLNGPHTPEDFLANIDDNMDGTTEGAPMDTPDLSIDTTDDLVTSLQLGE  
DFSSDILEDVQSLINPNPTKPENILTWL PLRMRNLPDSFFNPP

rs:XP\_014214488 [XP\_014214488] transcriptional coactivator yorkie isoform X3 [Copidosoma floridanum]. 49..63

MALNQDVGDTGSANKRNLEVRIDQNSESDLQALFDSVLKPKDKNRPLQVPLRMRNLPDSFFNPPSTGSKS  
PSISHSRENSADSAFGAGVLGGVNPAAVASGIVSNGSGSNGTTSPGATGQIQSAGLTIAHPRAHSSPASLQQTYA  
SAQQQSQHAPQPHSARHVHHQKQRSYDVISTVDDLGLPLPHGWEQARTPEGQIYYLNHITKTTTWEDPRKTAAAAA  
VAAVAAAAVESSKANNASAAVAAAAAANSALRPLPEGWEQARTPEGEIYFINHPARTTSWFDPRIPAHLQRAP  
LSGAMLPQSWQLQQQQQTATPGIQNNQTLQACQOKLRLQSLQMERERLQKQEQEIMRQVSSQELVMRQSTTDAAMDPF  
LSGINEQHARQESADSGGLGTAYPLNGPHTPEDFLANIDDNMDGTTEGAPMDTPDLSIDTTDDLVTSLQLGEDF  
SSDILEDVQSLINPNPTKPENILTWL PLRMRNLPDSFFNPP

rs:XP\_014214489 [XP\_014214489] transcriptional coactivator yorkie isoform X4 [Copidosoma floridanum]. 49..63

MALNQDVGDTGSANKRNLEVRIDQNSESDLQALFDSVLKPKDKNRPLQVPLRMRNLPDSFFNPPSTGSKS  
PSISHSRENSADSAFGAGVLGGVNPAAVASGIVSNGSGSNGTTSPGATGQIQSAGLTIAHPRAHSSPASLQQTYA  
SAQQQSQHAPQPHSARHVHHQKQRSYDVISTVDDLGLPLPHGWEQARTPEGQIYYLNHITKTTTWEDPRKTAAAAA  
VAAVAAAAVESSKANNASAAVAAAAAANSALRPLPEGWEQARTPEGEIYFINHPARTTSWFDPRIPAHLQRAP  
LSGAMLPQSWQLQQQQQTATPGIQNNQTLQACQOKLRLQSLQMERERLQKQEQEIMRQSTTDAAMDPFLSGINEQ  
HARQESADSGGLGTAYPLNGPHTPEDFLANIDDNMDGTTEGAPMDTPDLSIDTTDDLVTSLQLGEDFSSDILED  
VQSLINPNPTKPENILTWL PLRMRNLPDSFFNPP

rs:XP\_003780911 [XP\_003780911] protein **FAM181B** [Otolemur garnettii].>tr:H0XWY9\_OTOGA [H0XWY9] SubName: Full=Family with sequence similarity 181 member B {ECO:0000313|Ensembl:ENSOGAP00000020632};  
217..231

MAVQAALLSAHPFVFPFGFGGPPDGLGGAFGALDKCCFEDDETAAPAGALLSGAEGGDVREATRDLLSF  
IDSASSNIKLALDKPGKSKRKNVHRKYLQKQIKRCSGLMGAAAPGPPSPGAADAPAKRPLAVPGAPTPTVPIHGK  
AAPRREASQAAAAANLQSRSLAALFDSLRLHIPGAAEPAGGEAAGLRGAGAGGAAGDGIGSAGAAVPGARKVPLR  
ARNLPPSFFTEPSRAGGGGCSLSGPGVSLGDLEKGAEEVFFELLGPDYGAGTEAAVLLAAEPLDVFPPTGAAVLR  
GPPELEPGFFEPFPAVVGNVLYPEPWSVAGCPATKKPSLTTPRGCLTLNEPLRPVYPGVADSPGGEDGPGHLASF  
VPPFPDCALPPPPPHQVSYDYSAGYSRSAYSSLWRPDGVWEGPPGEEGAPRD PLRARNLPPSFFTEP

rs:XP\_023367100 [XP\_023367100] transcriptional coactivator YAP1 isoform X1 [Otolemur garnettii]. 82..96

MDPGQQPPPPQAPPQQGQPPAQTPOGQGGQPSGPGQPAPQAAPPAPPAGHQIVHVRGDSETDLEALFNAV  
MNPKTANVPQTVPMRLRKLPLDSFFKPPPEPKSHSRQASTDAGTAGALTPQHVRHSSPASLQLGAVSPGTLTPTGV  
VSGPAATSAAQHLRQSSFEIPDDVPLPAGWEMAKTSSGQRYFLNHIDQTTTWQDPRKAMLSQMNVTAPTSPVQVQ  
SMMNSASGPLPDGWEQAMTQDGEIYYINHNKNTTSWLDPRLDPRFGKAMNQRIQSAPVKQPPPLAPQSPQGGVM  
GGSNSNQQQMRLQQLQMEKERLRLKQOELLRQVRPQAMRNINPSTANSPKCQELALRSQLPTLEQDGGTQNPVS  
SPGMSQELRTMTTSSDPFLNSGTYHSRDESTDSGLSMSSYSVPRTPDDFLNSVDEMDTGDTINQSTLPSQQNRF

PDYLEAIPGTNVDLGTLEGDMNIEGEEELMPSLQEQALSSDILNDMESVLAATKLDKESFLTWL  
PMRLRKLPSFFKPP

rs:XP\_012658817 [XP\_012658817] transcriptional coactivator YAP1 isoform  
X2 [Otolemur garnettii]. 82..96

MDPGQQPPPQPAPPGQGQPPAQTPOGQGGQPSGPGQPAPQAAPPAPPAGHQIVHVRGDSETDLEALFNAV  
MNPKTANVPQTVPMRLRKLPSFFKPPPEPKSHSRQASTDAGTAGALTPQHVRHSSPASLQLGAVSPGTLTPTGV  
VSGPAATSAAQHLRQSSFEIPDDVPLPAGWEMAKTSSGQRYFLNHIDQTTTWQDPRKAMLSQMNVTAPTSPVQVQ  
SMMNSASGPLPDGWEQAMTQDGEIYYINHKNKTTSWLDPRLDPRFAMNQRISQSAPVKQPPPLAPQSPQGGVMGG  
SNSNQQQMRLQQLQMEKERLRLKQEQELLRQVRPQAMRNINPSTANSPKCQELALRSQLPTLEQDGGTQNPVSSP  
GMSQELRTMTTNSSDPFLNSGTYHSRDESTDSGLSMSSYSVPRTPDFFLNSVDEMDTGDTINQSTLPSQQNRFPD  
YLEAIPGTNVDLGTLEGDMNIEGEEELMPSLQEQALSSDILNDMESVLAATKLDKESFLTWL  
PMRLRKLPSFFKPP

rs:XP\_023367110 [XP\_023367110] transcriptional coactivator YAP1 isoform  
X3 [Otolemur garnettii]. 82..96

MDPGQQPPPQPAPPGQGQPPAQTPOGQGGQPSGPGQPAPQAAPPAPPAGHQIVHVRGDSETDLEALFNAV  
MNPKTANVPQTVPMRLRKLPSFFKPPPEPKSHSRQASTDAGTAGALTPQHVRHSSPASLQLGAVSPGTLTPTGV  
VSGPAATSAAQHLRQSSFEIPDDVPLPAGWEMAKTSSGQRYFLNHIDQTTTWQDPRKAMLSQMNVTAPTSPVQVQ  
SMMNSASGPLPDGWEQAMTQDGEIYYINHKNKTTSWLDPRLDPRFGKAMNQRISQSAPVKQPPPLAPQSPQGGVM  
GGSNSNQQQMRLQQLQMEKERLRLKQEQELLRQAMRNINPSTANSPKCQELALRSQLPTLEQDGGTQNPVSSPGM  
SQELRTMTTNSSDPFLNSGTYHSRDESTDSGLSMSSYSVPRTPDFFLNSVDEMDTGDTINQSTLPSQQNRFPDYL  
EAIPGTNVDLGTLEGDMNIEGEEELMPSLQEQALSSDILNDMESVLAATKLDKESFLTWL  
PMRLRKLPSFFKPP

rs:XP\_003780840 [XP\_003780840] transcriptional coactivator YAP1 isoform  
X4 [Otolemur garnettii].>tr:H0WLN6\_OTOGA [H0WLN6] SubName: Full=Yes  
associated protein 1 {ECO:0000313|Ensembl:ENSOGAP00000002584}; 82..96

MDPGQQPPPQPAPPGQGQPPAQTPOGQGGQPSGPGQPAPQAAPPAPPAGHQIVHVRGDSETDLEALFNAV  
MNPKTANVPQTVPMRLRKLPSFFKPPPEPKSHSRQASTDAGTAGALTPQHVRHSSPASLQLGAVSPGTLTPTGV  
VSGPAATSAAQHLRQSSFEIPDDVPLPAGWEMAKTSSGQRYFLNHIDQTTTWQDPRKAMLSQMNVTAPTSPVQVQ  
SMMNSASGPLPDGWEQAMTQDGEIYYINHKNKTTSWLDPRLDPRFAMNQRISQSAPVKQPPPLAPQSPQGGVMGG  
SNSNQQQMRLQQLQMEKERLRLKQEQELLRQAMRNINPSTANSPKCQELALRSQLPTLEQDGGTQNPVSSPGMSQ  
ELRTMTTNSSDPFLNSGTYHSRDESTDSGLSMSSYSVPRTPDFFLNSVDEMDTGDTINQSTLPSQQNRFPDYLEA  
IPGTNVDLGTLEGDMNIEGEEELMPSLQEQALSSDILNDMESVLAATKLDKESFLTWL PMRLRKLPSFFKPP

rs:XP\_023367125 [XP\_023367125] transcriptional coactivator YAP1 isoform  
X5 [Otolemur garnettii]. 82..96

MDPGQQPPPQPAPPGQGQPPAQTPOGQGGQPSGPGQPAPQAAPPAPPAGHQIVHVRGDSETDLEALFNAV  
MNPKTANVPQTVPMRLRKLPSFFKPPPEPKSHSRQASTDAGTAGALTPQHVRHSSPASLQLGAVSPGTLTPTGV  
VSGPAATSAAQHLRQSSFEIPDDVPLPAGWEMAKTSSGQRYFLNHIDQTTTWQDPRKAMLSQMNVTAPTSPVQVQ  
SMMNSASGPLPDGWEQAMTQDGEIYYINHKNKTTSWLDPRLDPRFGKAMNQRISQSAPVKQPPPLAPQSPQGGVM  
GGSNSNQQQMRLQQLQMEKERLRLKQEQELLRQELALRSQLPTLEQDGGTQNPVSSPGMSQELRTMTTNSSDPFL  
NSGTYHSRDESTDSGLSMSSYSVPRTPDFFLNSVDEMDTGDTINQSTLPSQQNRFPDYLEAIPGTNVDLGTLEGDM  
NIEGEEELMPSLQEQALSSDILNDMESVLAATKLDKESFLTWL PMRLRKLPSFFKPP

rs:XP\_003780841 [XP\_003780841] transcriptional coactivator YAP1 isoform  
X6 [Otolemur garnettii]. 82..96

MDPGQQPPPQPAPPGQGQPPAQTPOGQGGQPSGPGQPAPQAAPPAPPAGHQIVHVRGDSETDLEALFNAV  
MNPKTANVPQTVPMRLRKLPSFFKPPPEPKSHSRQASTDAGTAGALTPQHVRHSSPASLQLGAVSPGTLTPTGV  
VSGPAATSAAQHLRQSSFEIPDDVPLPAGWEMAKTSSGQRYFLNHIDQTTTWQDPRKAMLSQMNVTAPTSPVQVQ  
SMMNSASGPLPDGWEQAMTQDGEIYYINHKNKTTSWLDPRLDPRFAMNQRISQSAPVKQPPPLAPQSPQGGVMGG  
SNSNQQQMRLQQLQMEKERLRLKQEQELLRQELALRSQLPTLEQDGGTQNPVSSPGMSQELRTMTTNSSDPFLNS  
GTYHSRDESTDSGLSMSSYSVPRTPDFFLNSVDEMDTGDTINQSTLPSQQNRFPDYLEAIPGTNVDLGTLEGDM  
NIEGEEELMPSLQEQALSSDILNDMESVLAATKLDKESFLTWL PMRLRKLPSFFKPP

rs:XP\_012658838 [XP\_012658838] transcriptional coactivator YAP1 isoform  
X7 [Otolemur garnettii]. 82..96

MDPGQQPPPQPAPPGQGQPPAQTPOGQGGQPSGPGQPAPQAAPPAPPAGHQIVHVRGDSETDLEALFNAV

MNPKTANVPQTVPMRLRKL PDSFFKPPPEPKSHSRQASTDAGTAGALTPQH VRAHSSPASLQLGAVSPGTLTPTGV  
VSGPAATSAAQHLRQSSFEIPDDVPLPAGWEMAKTSSGQRYFLNHIDQTTTWQDPRKAMLSQMNVTAPTSPVQ  
SMMNSASAMNQRISQSAPVKQPPPLAPQSPQGGVMGGSNSNQQQQMRLQQLQMEKERLRLKQOELLRQVRPQAMR  
NINPSTANSPKCQELALRSQ LPTLEQDGGTQNPVSSPGMSQELRTMTTNSSDPFLNSGTYHSRDESTDSGLSMSS  
YSVPRTPD DFLNSVDEMDTGD TINQSTLPSQQNRFPDYLEAIPGTNVDLGTLEGDGMNIEGEEELMPSLQ EALSSD  
ILNDMESVLAATKLDKESFLT WL PMRLRKL PDSFFKPP

rs:XP\_003780842 [XP\_003780842] transcriptional coactivator YAP1 isoform  
X8 [Otolemur garnettii]. 82..96

MDPGQQPPPPQAPPPGQGPQAQTPQGQGPSPGPGQPAPQAAPPAPPAGHQIVHVRGDSETDLEALFNAV  
MNPKTANVPQTVPMRLRKL PDSFFKPPPEPKSHSRQASTDAGTAGALTPQH VRAHSSPASLQLGAVSPGTLTPTGV  
VSGPAATSAAQHLRQSSFEIPDDVPLPAGWEMAKTSSGQRYFLNHIDQTTTWQDPRKAMLSQMNVTAPTSPVQ  
SMMNSASAMNQRISQSAPVKQPPPLAPQSPQGGVMGGSNSNQQQQMRLQQLQMEKERLRLKQOELLRQAMRNINP  
STANSPKCQELALRSQ LPTLEQDGGTQNPVSSPGMSQELRTMTTNSSDPFLNSGTYHSRDESTDSGLSMSSYSVP  
RTPDDFLNSVDEMDTGD TINQSTLPSQQNRFPDYLEAIPGTNVDLGTLEGDGMNIEGEEELMPSLQ EALSSDILND  
MESVLAATKLDKESFLT WL PMRLRKL PDSFFKPP

rs:XP\_012658847 [XP\_012658847] transcriptional coactivator YAP1 isoform  
X9 [Otolemur garnettii]. 82..96

MDPGQQPPPPQAPPPGQGPQAQTPQGQGPSPGPGQPAPQAAPPAPPAGHQIVHVRGDSETDLEALFNAV  
MNPKTANVPQTVPMRLRKL PDSFFKPPPEPKSHSRQASTDAGTAGALTPQH VRAHSSPASLQLGAVSPGTLTPTGV  
VSGPAATSAAQHLRQSSFEIPDDVPLPAGWEMAKTSSGQRYFLNHIDQTTTWQDPRKAMLSQMNVTAPTSPVQ  
SMMNSASAMNQRISQSAPVKQPPPLAPQSPQGGVMGGSNSNQQQQMRLQQLQMEKERLRLKQOELLRQELALRSQ  
LPTLEQDGGTQNPVSSPGMSQELRTMTTNSSDPFLNSGTYHSRDESTDSGLSMSSYSVPRTPD DFLNSVDEMDT  
DTINQSTLPSQQNRFPDYLEAIPGTNVDLGTLEGDGMNIEGEEELMPSLQ EALSSDILNDMESVLAATKLDKESFL  
TWL PMRLRKL PDSFFKPP

rs:XP\_012658909 [XP\_012658909] protein **FAM181A** [Otolemur  
garnettii].>rs:XP\_012658910 [XP\_012658910] protein **FAM181A** [Otolemur  
garnettii].>rs:XP\_012658911 [XP\_012658911] protein **FAM181A** [Otolemur  
garnettii]. 129..143

MASDSDVKMLLNFNVLASSDIKAALDKSAPCRRSVDHRKYLQKQLKRFSQKYSRLPRGLPGRAAEPLK  
RGPEDRPGRLLLDPGPESPPGGGGYKEKALGNPYSEECLSKQVLQGSPEAARPGQVPMRKRQLPASFWEEP  
PTHSYMGLEGLGPREGPPYEGKKNCKGLES LGPEAAPVPMSPRALAEKEPLKMPGVSLVGRSSAWSCCPLQYH  
GQPIYPGLSGTL PQSPIPSLGLWRKSPAFFGELAHFCKEVDGLGQVYRPVVLKPIPTK PAMAPPIFNVFGYL  
PMRKRQLPASFWEEP

rs:XP\_002049990 [XP\_002049990] uncharacterized protein Dvir\_GJ20440,  
isoform C [Drosophila virilis].>tr:B4LP14\_DROVI [B4LP14] SubName:  
Full=Uncharacterized protein, isoform C {ECO:0000313|EMBL:EDW61183.2};  
61..75

MSLSNKSNI SEKEIDDEDMLSPTKLSTNLVVRVNQDSDDNLQALFDSV LNPGDAKLPLQLPFRMRKLPN  
SFFNPPAPLHSRANSADSTYDGSQTNINKTAQPEIQPSLSQNQPSHSRLTIHHFRARSSPASLQQNYNVR SRNES  
AANSNQGPAYPDNNVDFASSTANNIDL DVINTCMGQGPETPLSTQT IHHKQRSYDVVSP IQLQSQLGALPPGWEQ  
AKTNDGQIYYLNHTTKTTQWEDPRIQFRQQQRAMSDRKPADVIQTSKQASAPSISTHIGPLPDGWEQAVTESGD  
IYFINHIDRTTSWNDPRIQSGNLVLDPCDNLVSSLQIGDNICSNIFNDTQTVINTPSSHKPD DLEWYKIN  
PFRMRKLPNSFFNPP

rs:XP\_018650022 [XP\_018650022] hypothetical protein Smp\_014840  
[Schistosoma mansoni].>tr:G4VBX4\_SCHMA [G4VBX4] SubName:  
Full=Uncharacterized protein {ECO:0000313|EMBL:CCD77398.1};>gp:HE601625\_457  
[HE601625] hypothetical protein [Schistosoma mansoni] 38..52

MEGYDSRKPPSVRVTVLEDPNSSLQELFN PASQRQVPLHQRNLPKSFFVPPGDVNDNSRLSKLNSVNC  
NERNSTDFVVFH SKANSSPACLDAALRTSISANVPNHSHQKSLDVASKYKTD FSPDFAFSGCGPFFQQRNSQ  
QTALLYGPTMTFAISELPVGYDMAINESNQVYFLNHQTQETTWFDPRIPEKFQKWGMTPEELEQVHLRYAKQFLC  
TTPSSNLNVCVQQMPYFAGTGIHYVDTYQIQSFSVWLT PLHQRNLPKSFFVPP

rs:XP\_023695198 [XP\_023695198] protein **FAM181B** [Paramormyrops  
kingsleyae].>tr:A0A3B3QIA9\_9TELE [A0A3B3QIA9] SubName: Full=Uncharacterized

protein {ECO:0000313|Ensembl:ENSPKIP00000005554}; 156..170  
MAVQAPIVTSQFMNFCFLGSGMEYDAEKPFDDGSLLEGEVACEGDFRETTRDLSFIDSASSNIKLALDKP  
VKSKRKNVHRKYLQKQIKRCTGIIIGSGGNLAQDQGRQGSPTSHAGNIPGKPVARRDGIQANLQSKSLAALFEPT  
KDIRGEKTRKPLRQRNLPPSFFTEPAICPRVTSTSGMTLKDLEAGPEASEFFELLGPDYSMDLVEQDIPQGM  
MRVQQEALSGQDSYEPHLLSEGLLYAEPWGGCTGPSKKAAPCSLGENMRTIQAQPPLYCQLDSTVSLPVEENTLC  
ALAFPNLFTDYSPLPHATYDFASGYNRAAFPSL PLRQRNLPPSFFTEP

rs:XP\_023656308 [XP\_023656308] transcriptional coactivator YAP1-like  
[Paramormyrops kingsleyae].>rs:XP\_023656309 [XP\_023656309] transcriptional  
coactivator YAP1-like [Paramormyrops kingsleyae].>tr:A0A3B3T2R5\_9TELE  
[A0A3B3T2R5] SubName: Full=Uncharacterized protein  
{ECO:0000313|Ensembl:ENSPKIP00000037402}; 45..59  
MDPGQHNPVGHQIVHVRGDSETDLEALFNAVMPKNASVPPTLPMRMRKLPESFFQPPDKSHSRQVS  
TDAGTSGALTPQHIRAHSSPASLQLGSLSPAALAGTAPPASSSQHHRQSSYEIPDDVPLPPGWEMAKTSSGQRYF  
LNHLDKTTTWQDPRKAMPLPINQAAPLPVVSSATGPLPEGWEQAITPEGEIYYINHKNKSTSWLDPRLDSRIVLSS  
QRVSQSTPEKLTSSQSSGMSQVRIQQMQMKERLRHEHQELLRQAQTQEPALRNQNHAAAGLEQDGSAPNAGSS  
SGVSQDARTMTTNGSDPFLNSGTYHSRDESTDSGLSVSSYSVPRTPDLLNSVEEMETGDSAAPTATQHSVFP  
DYLDITPGTSVDFGTLESESMAMESEELMPSLQEQALNSDILSDMESVLAATAKCDKESFLTWL  
PMRMRKLPESFFQPP

rs:XP\_023658183 [XP\_023658183] protein **FAM181A** [Paramormyrops  
kingsleyae].>rs:XP\_023658184 [XP\_023658184] protein **FAM181A** [Paramormyrops  
kingsleyae]. 128..142  
MASADSEVKTLNLFVNLAASDIKAALDKSAPCRRSVDHRKYLQKQLKRFSQKCSRMPSCRCHAYRAGECG  
VPKLTLEDKSAVFAFEPANRNLQLSRLKDRSGSEVRSEDNSGLNAKPKAERDPHRQDQVPMRKRQLPASFWEEPSS  
SRSKRDAPVSWRKSQPGDAGISGPSAPEEEEEKSSDERKAHLILSSEQIAAEKEPLMLDITPGSVNVCGCCPFQ  
YHGHVVFQGHIVLPHSSFSEVGLWGNTTIVVHAETSDIQNGQKSQTHVVVKPIPTKPSVPSPIFSVFGFI  
PMRKRQLPASFWEEP

rs:XP\_023662914 [XP\_023662914] transcriptional coactivator YAP1-like  
isoform X1 [Paramormyrops kingsleyae].>tr:A0A3B3SY94\_9TELE [A0A3B3SY94]  
SubName: Full=Yes-associated protein 1  
{ECO:0000313|Ensembl:ENSPKIP00000035218}; 45..59  
MDPSQHNPAGHQIVHVRGDSETDLEALFNAVMPKNAVVPQSVPMRMRKLPDSFFKPPPEPKSHSRQAS  
TDAGTAGSLTPQHVRHSSPASLQLGTVSPSSLAGLAPPGASPOHLRQSSFEIPDDVPLPPGWEMAKTSSGQRYF  
LNHIDQSTTWQDPRKAMMQMNQTSNPSPVSVQQNIMSSSSGTLPEGWEQAVTPEGEIYYINHKNKTTSWLDPRLD  
SRYSLNQQRMSQSAPGKPPQAVPASPOGGGSQLRLQQLQMEKERLRRLKQEQELLRQRPOELTLRTQLPSSLEQEGG  
TQSSISPSMAQDGRMTTNSDPPFLNSGTYHSRDESTDSGLSMSSYSVPRTPDFFLNSVDEMDTGDALGPASMAT  
QPSRFPDYLDITPGTNVDLGTLEGESMAVEGEELMPSLQEQALSSDILNDMESVLAATAKIDKESFLTWL  
PMRMRKLPDSFFKPP

rs:XP\_023662915 [XP\_023662915] transcriptional coactivator YAP1-like  
isoform X2 [Paramormyrops kingsleyae].>tr:A0A3B3SWU8\_9TELE [A0A3B3SWU8]  
SubName: Full=Yes-associated protein 1  
{ECO:0000313|Ensembl:ENSPKIP00000035232}; 45..59  
MDPSQHNPAGHQIVHVRGDSETDLEALFNAVMPKNAVVPQSVPMRMRKLPDSFFKPPPEPKSHSRQAS  
TDAGTAGSLTPQHVRHSSPASLQLGTVSPSSLAGLAPPGASPOHLRQSSFEIPDDVPLPPGWEMAKTSSGQRYF  
LNHIDQSTTWQDPRKAMMQMNQTSNPSPVSVQQNIMSSSGLNQQRMSQSAPGKPPQAVPASPOGGGSQLRLQQL  
QMEKERLRRLKQEQELLRQRPOELTLRTQLPSSLEQEGGTQSSISPSMAQDGRMTTNSDPPFLNSGTYHSRDESTD  
SGLSMSSYSVPRTPDFFLNSVDEMDTGDALGPASMATQPSRFPDYLDITPGTNVDLGTLEGESMAVEGEELMPSL  
QEQALSSDILNDMESVLAATAKIDKESFLTWL PMRMRKLPDSFFKPP

rs:XP\_017199173 [XP\_017199173] PREDICTED: transcriptional coactivator  
YAP1 isoform X1 [Oryctolagus cuniculus]. 85..99  
MDPGQQPPPPQAPQGGQPPAQQPPQGGQPPSGPGQAPQASQAAPQAPPAGHQIVHVRGDSETDLEALF  
NAVMPKNTANVPQTVPMRLRKLKLPDSFFKPPPEPKSHSRQASTDAGTAGALTPQHVRHSSPASLQLGAVSPGTLTP  
TGVSVPAAATPTTQQHLQSSFEIPDDVPLPAGWEMAKTSSGQRYFLNHIDQSTTWQDPRKAMLSQMNVTAPTSP  
PVQQNMNSASGPLPDGWEQAMTQDGEIYYINHKNKTTSWLDPRLDPRFGKAMNQRISQSAPVKQPPPLAPQSPQ  
GGVMGGSSNQQQMRLQQLQMEKERLRRLKHQEQELLRQVRPQAMRNINPSTANSPKCQELALRSQLPTLEQDGGTQ

NPVSSPGMSQELRTMTTNSDDPFLNSGTYHSRDESTDSGLSMSSYSVPRTPDFFLNSVDEMDTGDTINQSSLPSQ  
QNRFPDYLEAIPGTNVDLGTLEGDGMNIEGELMPSLQEQALSSDILNDMESVLAATKLDKESFLTWL  
PMRLRKLPSDFKPP

rs:XP\_017199176 [XP\_017199176] PREDICTED: transcriptional coactivator  
YAP1 isoform X2 [Oryctolagus cuniculus]. 85..99  
MDPGQQPPPPQAPQGGQPPAQQPPQGGPPSGPGQPAPQASQAAPQAPPAGHQIVHVRGDSETDLEALF  
NAVMNPKTANVPQTVPMRLRKLPSDFKPPPEPKSHSRQASTDAGTAGALTPQHVRHSSPASLQLGAVSPGTLTP  
TGVVSGPAATPTTQQHLQSSSFEIPDDVPLPAGWEMAKTSSGQRYFLNHIDQTTTWQDPRKAMLSQMNVTAPTSP  
PVQQNMNSASGPLPDGWEQAMTQDGEIYYINHKNKTTSWLDPRLDPRFAMNQRISQSAPVKQPPPLAPQSPQGG  
VMGGGSSNQQQMRLQQLQMEKERLRLKHQELLRQVRPQAMRNINPSTANSPKCQELALRSQLPTLEQDGGTQNP  
VSSPGMSQELRTMTTNSDDPFLNSGTYHSRDESTDSGLSMSSYSVPRTPDFFLNSVDEMDTGDTINQSSLPSQQN  
RFPDYLEAIPGTNVDLGTLEGDGMNIEGELMPSLQEQALSSDILNDMESVLAATKLDKESFLTWL  
PMRLRKLPSDFKPP

rs:XP\_017199180 [XP\_017199180] PREDICTED: transcriptional coactivator  
YAP1 isoform X3 [Oryctolagus cuniculus]. 85..99  
MDPGQQPPPPQAPQGGQPPAQQPPQGGPPSGPGQPAPQASQAAPQAPPAGHQIVHVRGDSETDLEALF  
NAVMNPKTANVPQTVPMRLRKLPSDFKPPPEPKSHSRQASTDAGTAGALTPQHVRHSSPASLQLGAVSPGTLTP  
TGVVSGPAATPTTQQHLQSSSFEIPDDVPLPAGWEMAKTSSGQRYFLNHIDQTTTWQDPRKAMLSQMNVTAPTSP  
PVQQNMNSASGPLPDGWEQAMTQDGEIYYINHKNKTTSWLDPRLDPRFGKAMNQRISQSAPVKQPPPLAPQSPQ  
GGVMGGGSSNQQQMRLQQLQMEKERLRLKHQELLRQAMRNINPSTANSPKCQELALRSQLPTLEQDGGTQNPVS  
SPGMSQELRTMTTNSDDPFLNSGTYHSRDESTDSGLSMSSYSVPRTPDFFLNSVDEMDTGDTINQSSLPSQQNR  
FPDYLEAIPGTNVDLGTLEGDGMNIEGELMPSLQEQALSSDILNDMESVLAATKLDKESFLTWL  
PMRLRKLPSDFKPP

rs:XP\_017199183 [XP\_017199183] PREDICTED: transcriptional coactivator  
YAP1 isoform X4 [Oryctolagus cuniculus]. 85..99  
MDPGQQPPPPQAPQGGQPPAQQPPQGGPPSGPGQPAPQASQAAPQAPPAGHQIVHVRGDSETDLEALF  
NAVMNPKTANVPQTVPMRLRKLPSDFKPPPEPKSHSRQASTDAGTAGALTPQHVRHSSPASLQLGAVSPGTLTP  
TGVVSGPAATPTTQQHLQSSSFEIPDDVPLPAGWEMAKTSSGQRYFLNHIDQTTTWQDPRKAMLSQMNVTAPTSP  
PVQQNMNSASGPLPDGWEQAMTQDGEIYYINHKNKTTSWLDPRLDPRFAMNQRISQSAPVKQPPPLAPQSPQGG  
VMGGGSSNQQQMRLQQLQMEKERLRLKHQELLRQAMRNINPSTANSPKCQELALRSQLPTLEQDGGTQNPVSS  
PGMSQELRTMTTNSDDPFLNSGTYHSRDESTDSGLSMSSYSVPRTPDFFLNSVDEMDTGDTINQSSLPSQQNR  
FPDYLEAIPGTNVDLGTLEGDGMNIEGELMPSLQEQALSSDILNDMESVLAATKLDKESFLTWL  
PMRLRKLPSDFKPP

rs:XP\_017199187 [XP\_017199187] PREDICTED: transcriptional coactivator  
YAP1 isoform X5 [Oryctolagus cuniculus]. 85..99  
MDPGQQPPPPQAPQGGQPPAQQPPQGGPPSGPGQPAPQASQAAPQAPPAGHQIVHVRGDSETDLEALF  
NAVMNPKTANVPQTVPMRLRKLPSDFKPPPEPKSHSRQASTDAGTAGALTPQHVRHSSPASLQLGAVSPGTLTP  
TGVVSGPAATPTTQQHLQSSSFEIPDDVPLPAGWEMAKTSSGQRYFLNHIDQTTTWQDPRKAMLSQMNVTAPTSP  
PVQQNMNSASGPLPDGWEQAMTQDGEIYYINHKNKTTSWLDPRLDPRFGKAMNQRISQSAPVKQPPPLAPQSPQ  
GGVMGGGSSNQQQMRLQQLQMEKERLRLKHQELLRQVRPQELALRSQLPTLEQDGGTQNPVSSPGMSQELRTMT  
TNSDDPFLNSGTYHSRDESTDSGLSMSSYSVPRTPDFFLNSVDEMDTGDTINQSSLPSQQNRFPDYLEAIPGTN  
VDLGTLEGDGMNIEGELMPSLQEQALSSDILNDMESVLAATKLDKESFLTWL PMRLRKLPSDFKPP

rs:XP\_017199191 [XP\_017199191] PREDICTED: transcriptional coactivator  
YAP1 isoform X6 [Oryctolagus cuniculus]. 85..99  
MDPGQQPPPPQAPQGGQPPAQQPPQGGPPSGPGQPAPQASQAAPQAPPAGHQIVHVRGDSETDLEALF  
NAVMNPKTANVPQTVPMRLRKLPSDFKPPPEPKSHSRQASTDAGTAGALTPQHVRHSSPASLQLGAVSPGTLTP  
TGVVSGPAATPTTQQHLQSSSFEIPDDVPLPAGWEMAKTSSGQRYFLNHIDQTTTWQDPRKAMLSQMNVTAPTSP  
PVQQNMNSASGPLPDGWEQAMTQDGEIYYINHKNKTTSWLDPRLDPRFAMNQRISQSAPVKQPPPLAPQSPQGG  
VMGGGSSNQQQMRLQQLQMEKERLRLKHQELLRQVRPQELALRSQLPTLEQDGGTQNPVSSPGMSQELRTMTN  
SSDDPFLNSGTYHSRDESTDSGLSMSSYSVPRTPDFFLNSVDEMDTGDTINQSSLPSQQNRFPDYLEAIPGTN  
VDLGTLEGDGMNIEGELMPSLQEQALSSDILNDMESVLAATKLDKESFLTWL PMRLRKLPSDFKPP

rs:XP\_017199194 [XP\_017199194] PREDICTED: transcriptional coactivator  
YAP1 isoform X7 [Oryctolagus cuniculus]. 85..99

MDPGQQPPPPQAPQGGQPPAQQPPQGGQPPSGPGQPAPQASQAAPQAPPAGHQIVHVRGDSETDLEALF  
NAVMNPKTANVPQTVPMRLRKLKLPDSFFKPPPEPKSHSRQASTDAGTAGALTPQHVRHSSPASLQLGAVSPGTLTP  
TGVVSGPAATPTTQQHLQSSFEIPDDVPLPAGWEMAKTSSGQRYFLNHIDQTTTWQDPRKAMLSQMNVTAPTSP  
PVQQNMMNSASGPLPDGWEQAMTQDGEIYYINHKNKTTSWLDPRLDPRFGKAMNQRISSQAPVKQPPPLAPQSPQ  
GGVMGGSSNQQQMRLQQLQMEKERLRLKHQELLRQELALRSQLPTLEQDGGTQNPVSSPGMSQELRMTTNS  
DPFLNSGTYHSRDESTDSGLSMSSYSVPRTPDFFLNSVDEMDTGDTINQSSLPSQQNRFPDYLEAIPGTNVDLGT  
LEGDGMNIEGEELMPSLQEQALSSDILNDMESVLAATKLDKESFLTWL PMRLRKLKLPDSFFKPP

rs:XP\_017199199 [XP\_017199199] PREDICTED: transcriptional coactivator  
YAP1 isoform X8 [Oryctolagus cuniculus]. 85..99

MDPGQQPPPPQAPQGGQPPAQQPPQGGQPPSGPGQPAPQASQAAPQAPPAGHQIVHVRGDSETDLEALF  
NAVMNPKTANVPQTVPMRLRKLKLPDSFFKPPPEPKSHSRQASTDAGTAGALTPQHVRHSSPASLQLGAVSPGTLTP  
TGVVSGPAATPTTQQHLQSSFEIPDDVPLPAGWEMAKTSSGQRYFLNHIDQTTTWQDPRKAMLSQMNVTAPTSP  
PVQQNMMNSASGPLPDGWEQAMTQDGEIYYINHKNKTTSWLDPRLDPRFAMNQRISSQAPVKQPPPLAPQSPQGG  
VMGGSSNQQQMRLQQLQMEKERLRLKHQELLRQELALRSQLPTLEQDGGTQNPVSSPGMSQELRMTTNSSDP  
FLNSGTYHSRDESTDSGLSMSSYSVPRTPDFFLNSVDEMDTGDTINQSSLPSQQNRFPDYLEAIPGTNVDLGTLE  
GDGMNIEGEELMPSLQEQALSSDILNDMESVLAATKLDKESFLTWL PMRLRKLKLPDSFFKPP

rs:XP\_008261583 [XP\_008261583] PREDICTED: LOW QUALITY PROTEIN: protein  
**FAM181B** [Oryctolagus cuniculus]. 218..232

MAVQAALLSTHPFVAFGFGGSPDGLGGGFGALDKGCCFEDDETGXYPAGALLSGAEGGDVREATRDLLS  
IDSASSNIKALDKPGKSKRKNVHRKYLRSRXXXXXXXXXGAAPPSPPAADTPAKRPPGAPTVAAPAHGKAAP  
RREASQAAAAASLQSRSLAALFDSLHVPGAAEPAGSAVASPAAGLSGAGAVGAGEDATGPGVGGTVAPGARKVPL  
RARNLPPSFFTEPSRAGGGGCGPSAPGVSLGDLEKGAEEAEFFELLGPDYGSAGTEAGVLLAAEPLDVFPGGGAV  
LRATPELEPGLFEPPPAMVGSLLYSETWSAPGCPQSKKPALAAPRGGLTLNEPLRLLYPAAADSAGGEDGPGHLA  
SFAPFFPDCALPPPPSHQVSYDYSAGYGRSTYSSLWRPDGVWEGAPGEEGARRD PLRARNLPPSFFTEP

rs:XP\_013416853 [XP\_013416853] uncharacterized protein LOC106178273  
[Lingula anatina].>tr:A0A1S3K2I7\_LINUN [A0A1S3K2I7] SubName:  
Full=uncharacterized protein LOC106178273  
{ECO:0000313|RefSeq:XP\_013416853.1}; 160..174

MEDYRSHYNIKSTNMSSVPKTTGGKLGSPSTYAVVPPNRPPSGGKRGPSGPLANSSEEDAGDAVNISVS  
STSTTTSSPSTPSPNASSDYENVASPGGSSTASGPIYVRPPGFAHGGQEILKTPASKPSWRKKRAILAMKEGLK  
REPTPPRPKSKKDLPLPMRMRALPQSFFQQPNVPHNVSPGAAYPVLPLMNRSDVTEVRPVTPEEKEKKNKAPK  
PPERKITLGNPDLLFKLFEGYGDDEKKGSTSIKRGKPKVHSTQGKAFVTGEDPFIMDAVAEKLFPQLSLESSK  
QQGYSGLGHSSQLHVVTLREGDKSVMLPALSSREQNYSQLSELVSHI PMRMRALPQSFFQQP

rs:XP\_024110882 [XP\_024110882] transcriptional coactivator YAP1 isoform  
X1 [Pongo abelii].>rs:XP\_016777348 [XP\_016777348] transcriptional  
coactivator YAP1 isoform X1 [Pan troglodytes].>rs:XP\_005271435  
[XP\_005271435] transcriptional coactivator YAP1 isoform X1 [Homo sapiens].  
85..99

MDPGQQPPPPQAPQGGQPPSQQPPQGGQPPSGPGQPAPAAATQAAPQAPPAGHQIVHVRGDSETDLEALF  
NAVMNPKTANVPQTVPMRLRKLKLPDSFFKPPPEPKSHSRQASTDAGTAGALTPQHVRHSSPASLQLGAVSPGTLTP  
TGVVSGPAATPTAQHLRQSSFEIPDDVPLPAGWEMAKTSSGQRYFLNHIDQTTTWQDPRKAMLSQMNVTAPTSP  
VQQNMMNSASGPLPDGWEQAMTQDGEIYYINHKNKTTSWLDPRLDPRFGKAMNQRISSQAPVKQPPPLAPQSPQ  
GVMGGSSNSNQQQMRLQQLQMEKERLRLKHQELLRQVRPQAMRNINPSTANSKPCQELALRSQLPTLEQDGGTQ  
NPVSSPGMSQELRMTTNSSDPFLNSGTYHSRDESTDSGLSMSSYSVPRTPDFFLNSVDEMDTGDTINQSTLPSQ  
NRFPDYLEAIPGTNVDLGTLEGDGMNIEGEELMPSLQEQALSSDILNDMESVLAATKLDKESFLTWL  
PMRLRKLKLPDSFFKPP

rs:XP\_024110883 [XP\_024110883] transcriptional coactivator YAP1 isoform  
X2 [Pongo abelii].>rs:XP\_016777349 [XP\_016777349] transcriptional  
coactivator YAP1 isoform X2 [Pan troglodytes].>rs:NP\_001269030  
[NP\_001269030] transcriptional coactivator YAP1 isoform 9 [Homo sapiens].  
85..99

MDPGQQPPPPQAPQGGQPPSQQPPQGGQPPSGPGQPAPAAATQAAPQAPPAGHQIVHVRGDSETDLEALF  
NAVMNPKTANVPQTVPMRLRKLKLPDSFFKPPPEPKSHSRQASTDAGTAGALTPQHVRHSSPASLQLGAVSPGTLTP  
TGVVSGPAATPTAQHLRQSSFEIPDDVPLPAGWEMAKTSSGQRYFLNHIDQTTTWQDPRKAMLSQMNVTAPTSP

VQQNMMNSASGPLPDGWEQAMTQDGEIYYINHKNKTTSWLDPRLDPRFAMNQRISQSAPVKQPPPLAPQSPQGGV  
MGGSNSNQOQMLRQLQMEKERLRLKQOELLRQVRPQAMRNINPSTANSPKCQELALRSQLPTLEQDGGTQNPV  
SSPGMSQELRTMTTNSSDPFLNSGTYHSRDESTDSGLSMSSYSVPRTPDDFLNSVDEMDTGDTINQSTLPSQQNR  
FPDYLEAIPGTNVDLGTLEGDGMNIEGEELMPSLQEQALSSDILNDMESVLAATKLDKESFLTWL  
PMRLRKLPSFFKPP

rs:XP\_024110884 [XP\_024110884] transcriptional coactivator YAP1 isoform  
X3 [Pongo abelii].>rs:XP\_016777350 [XP\_016777350] transcriptional  
coactivator YAP1 isoform X3 [Pan troglodytes].>rs:XP\_005271437  
[XP\_005271437] transcriptional coactivator YAP1 isoform X2 [Homo sapiens].  
85..99

MDPGQQPPPQPAPQGGQPPSQQPPQGGPPSGPGQPAPAATQAAPQAPPAGHQIVHVRGDSETDLEALF  
NAVMNPKTANVPQTVPMRLRKLPSFFKPPPEPKSHSRQASTDAGTAGALTPQHVRHSSPASLQLGAVSPGTLTP  
TGVVSGPAATPTAQHLRQSSFEIPDDVPLPAGWEMAKTSSGQRYFLNHIDQTTTQDPRKAMLSQMNVTAPTSPP  
VQQNMMNSASGPLPDGWEQAMTQDGEIYYINHKNKTTSWLDPRLDPRFGKAMNQRISQSAPVKQPPPLAPQSPQG  
GVMGGSNSNQOQMLRQLQMEKERLRLKQOELLRQAMRNINPSTANSPKCQELALRSQLPTLEQDGGTQNPVSS  
PGMSQELRTMTTNSSDPFLNSGTYHSRDESTDSGLSMSSYSVPRTPDDFLNSVDEMDTGDTINQSTLPSQQNRFP  
DYLEAIPGTNVDLGTLEGDGMNIEGEELMPSLQEQALSSDILNDMESVLAATKLDKESFLTWL  
PMRLRKLPSFFKPP

rs:XP\_024110886 [XP\_024110886] transcriptional coactivator YAP1 isoform  
X5 [Pongo abelii].>rs:XP\_016777351 [XP\_016777351] transcriptional  
coactivator YAP1 isoform X5 [Pan troglodytes].>rs:XP\_005271438  
[XP\_005271438] transcriptional coactivator YAP1 isoform X3 [Homo sapiens].  
85..99

MDPGQQPPPQPAPQGGQPPSQQPPQGGPPSGPGQPAPAATQAAPQAPPAGHQIVHVRGDSETDLEALF  
NAVMNPKTANVPQTVPMRLRKLPSFFKPPPEPKSHSRQASTDAGTAGALTPQHVRHSSPASLQLGAVSPGTLTP  
TGVVSGPAATPTAQHLRQSSFEIPDDVPLPAGWEMAKTSSGQRYFLNHIDQTTTQDPRKAMLSQMNVTAPTSPP  
VQQNMMNSASGPLPDGWEQAMTQDGEIYYINHKNKTTSWLDPRLDPRFGKAMNQRISQSAPVKQPPPLAPQSPQG  
GVMGGSNSNQOQMLRQLQMEKERLRLKQOELLRQVRPQELALRSQLPTLEQDGGTQNPVSSPGMSQELRTMTT  
NSSDPFLNSGTYHSRDESTDSGLSMSSYSVPRTPDDFLNSVDEMDTGDTINQSTLPSQQNRFPDYLEAIPGTNVD  
LGTLEGDGMNIEGEELMPSLQEQALSSDILNDMESVLAATKLDKESFLTWL PMRLRKLPSFFKPP

rs:XP\_024110887 [XP\_024110887] transcriptional coactivator YAP1 isoform  
X6 [Pongo abelii].>rs:XP\_016777352 [XP\_016777352] transcriptional  
coactivator YAP1 isoform X6 [Pan troglodytes].>rs:NP\_001269029  
[NP\_001269029] transcriptional coactivator YAP1 isoform 8 [Homo sapiens].  
85..99

MDPGQQPPPQPAPQGGQPPSQQPPQGGPPSGPGQPAPAATQAAPQAPPAGHQIVHVRGDSETDLEALF  
NAVMNPKTANVPQTVPMRLRKLPSFFKPPPEPKSHSRQASTDAGTAGALTPQHVRHSSPASLQLGAVSPGTLTP  
TGVVSGPAATPTAQHLRQSSFEIPDDVPLPAGWEMAKTSSGQRYFLNHIDQTTTQDPRKAMLSQMNVTAPTSPP  
VQQNMMNSASGPLPDGWEQAMTQDGEIYYINHKNKTTSWLDPRLDPRFAMNQRISQSAPVKQPPPLAPQSPQGGV  
MGGSNSNQOQMLRQLQMEKERLRLKQOELLRQVRPQELALRSQLPTLEQDGGTQNPVSSPGMSQELRTMTTNS  
SDPFLNSGTYHSRDESTDSGLSMSSYSVPRTPDDFLNSVDEMDTGDTINQSTLPSQQNRFPDYLEAIPGTNVDL  
GTLEGDGMNIEGEELMPSLQEQALSSDILNDMESVLAATKLDKESFLTWL PMRLRKLPSFFKPP

rs:XP\_024110888 [XP\_024110888] transcriptional coactivator YAP1 isoform  
X7 [Pongo abelii].>rs:XP\_016777353 [XP\_016777353] transcriptional  
coactivator YAP1 isoform X7 [Pan troglodytes].>rs:XP\_005271440  
[XP\_005271440] transcriptional coactivator YAP1 isoform X4 [Homo sapiens].  
85..99

MDPGQQPPPQPAPQGGQPPSQQPPQGGPPSGPGQPAPAATQAAPQAPPAGHQIVHVRGDSETDLEALF  
NAVMNPKTANVPQTVPMRLRKLPSFFKPPPEPKSHSRQASTDAGTAGALTPQHVRHSSPASLQLGAVSPGTLTP  
TGVVSGPAATPTAQHLRQSSFEIPDDVPLPAGWEMAKTSSGQRYFLNHIDQTTTQDPRKAMLSQMNVTAPTSPP  
VQQNMMNSASGPLPDGWEQAMTQDGEIYYINHKNKTTSWLDPRLDPRFGKAMNQRISQSAPVKQPPPLAPQSPQG  
GVMGGSNSNQOQMLRQLQMEKERLRLKQOELLRQELALRSQLPTLEQDGGTQNPVSSPGMSQELRTMTTNSD  
PFLNSGTYHSRDESTDSGLSMSSYSVPRTPDDFLNSVDEMDTGDTINQSTLPSQQNRFPDYLEAIPGTNVDLGT  
LEGDGMNIEGEELMPSLQEQALSSDILNDMESVLAATKLDKESFLTWL PMRLRKLPSFFKPP



rs:XP\_024110889 [XP\_024110889] transcriptional coactivator YAP1 isoform X8 [Pongo abelii].>rs:XP\_016777354 [XP\_016777354] transcriptional coactivator YAP1 isoform X8 [Pan troglodytes].>rs:NP\_001181973 [NP\_001181973] transcriptional coactivator YAP1 isoform 3 [Homo sapiens]. 85..99

MDPGQQPPPPQAPQGGQPPSQPPQGGQPPSGPGQPAPAATQAAPQAPPAGHQIVHVRGDSETDLEALF NAVMNPKTANVPQTVPMRLRKLKLPDSFFKPPPEPKSHSRQASTDAGTAGALTPQHVRHSSPASLQLGAVSPGTLTP TGVVSGPAATPTAQHLRQSSFEIPDDVPLPAGWEMAKTSSGQRYFLNHIDQTTTWQDPRKAMLSQMNVTAPTSPP VQQNMNSASGPLPDGWEQAMTQDGEIYYINHKNKTTSWLDPRLDPRFAMNQRISQSAPVKQPPPLAPQSPQGGV MGGSNSNQQQMRLQQLQMEKERLRLKQQELLRQELALRSQLPTLEQDGGTQNPVSSPGMSQELRMTTNSDDPF LNSGTYHSRDESTDSGLSMSSYSVPRTPDDFLNSVDEMMDTGDINQSTLPSQQNRFPDYLEAIPGTNVDLGTLEG DGMNIEGEELMPSLQEQALSSDILNDMESVLAATKLDKESFLTWL PMRLRKLKLPDSFFKPP

rs:XP\_024111254 [XP\_024111254] protein **FAM181B** [Pongo abelii].>tr:A0A2J8V0L8\_PONAB [A0A2J8V0L8] SubName: Full=**FAM181B** isoform 1 {ECO:0000313|EMBL:PNJ51058.1}; 221..235

MAVQAALLSTHPFVFGFGGSPDGLGGAFGALDKGCCFEDDETGAPAGALLSGAEGGDVREATRDLISF IDSASSNIKLALDKPGKSKRKNVHRKYLQKQIKRCSGLMGAAPPSPSAADTPAKRPLAAPSAPTVAAPAHGK AAPRREASQAAAAASLQSRSLAALFDSLHRVPGGAEPAGGAVAAPAAGLGGAGTGGAGGDVAGPAGATAIPGARK VPLRARNLPPSFFTEPSRAGGGCVSPGPDVSLGDLEKGAEEVEFFELLGPDYAGATEAAVLLAAEPLDVFPAGA SVLRGPPELEPGLFEPPIAVVGNLLYPEPWSVPGCPPTKKSPLTAPRGGLTLNEPLRPLYPAAADSPGGEDGPGH LASFAPFFPDICALPPPPPHQVSYDYSAGYSRTAYSSLWRSDDGVWEGAPGEEGAHRD PLRARNLPPSFFTEP

rs:XP\_024087613 [XP\_024087613] protein **FAM181A** isoform X1 [Pongo abelii]. 178..192

MQPTQSTEGLRKQSTAKQVSSVPFLGAAGHQQLPSSWKASCGLVMASDSDVKMLLNFNVLASSD IKAALDKSAPCRRSVDHRKYLQKQLKRFSQKYSRLPRGLPGRAAEPLYLKRGESEDRPGRLLLDLGPDSSPGGGGGC KEKALRNYPREECLAKEQLPQGHPEAAQPGQVPMRKRQLPASFWEEPRTSHYHVGLGGLGPREGPPYEGKKN CKGLEPLGPETTPVPMSPRALAEKEPLKMPGVSLVGRVNAWSCCFFQYHGQPIYPGPLGTLQSPVPSLGLWRKS PAFPGELTHLCKDVDGLGQKVCRPVVLKPIPTKPAVPPPIFNVFGYLPMRKRQLPASFWEEP

rs:XP\_003778403 [XP\_003778403] protein **FAM181A** isoform X2 [Pongo abelii].>rs:XP\_003778404 [XP\_003778404] protein **FAM181A** isoform X2 [Pongo abelii].>rs:XP\_003778405 [XP\_003778405] protein **FAM181A** isoform X2 [Pongo abelii]. 129..143

MASDSDVKMLLNFNVLASSDIKAALDKSAPCRRSVDHRKYLQKQLKRFSQKYSRLPRGLPGRAAEPLYL KRGESEDRPGRLLLDLGPDSSPGGGGGCCKEKALRNYPREECLAKEQLPQGHPEAAQPGQVPMRKRQLPASFWEEP RTSHYHVGLGGLGPREGPPYEGKKNCKGLEPLGPETTPVPMSPRALAEKEPLKMPGVSLVGRVNAWSCCFFQYHG QPIYPGPLGTLQSPVPSLGLWRKSPAFPGELTHLCKDVDGLGQKVCRPVVLKPIPTKPAVPPPIFNVFGYL PMRKRQLPASFWEEP

rs:XP\_013411604 [XP\_013411604] uncharacterized protein LOC106174544 [Lingula anatina].>tr:A0A1S3JNQ1\_LINUN [A0A1S3JNQ1] SubName: Full=uncharacterized protein LOC106174544 {ECO:0000313|RefSeq:XP\_013411604.1}; 120..134

MATADRSGGETGQQLLSFVDIASSNIKLALDKCGKSKRKNVHRKYLQKQLKKSNGSYDTETAVIHGGR VSKPTRKETSIFYGIQHKSLQALFDPRTLHKQCCADPQAKLVKGCSCRNRVPLKNRKLPPSFFTEPAKLLQSQSYT AYYIENALQNYYSQSQLETVANGVYTCQQTTLDPYFTHEIDIHDIIGGQDGLARPSSCGSSQHSSSGSPQRETSS TSSPPIPLLPISSRTDYRLQSWDQPYASSYNGTIFMDPNYNEPYGYQQEELSGAFSNMGQVGNAMATLRSPhDGL TSMENVYALPNFSQTFSSYVTGADVSSVDNPFVAPCMLNSYTCL PLKNRKLPPSFFTEP

rs:XP\_023934073 [XP\_023934073] transcriptional coactivator YAP1 [Bicyclus anynana]. 44..58

MALNSDGEQKSNLVLVLDQSDSVLQSLFDTVLKPDSCRPLQVPLRMRQLPKSFFNPPSTGSKSPSVSH SRENSADSAFGSSSATGSAPVSHSRAHSSPASLQOQTYAAGQPAQPPPLPHQAKQRSYDVGTHLPDDLGLPLPSGW EQARTPEGQIYYLNHITKTTTWTWEDPRKTLAAQAMAGGVQHQAEEALLTQTVPSTPQIPTPTPAAKSTSTNTATDP LGPLPEGWEQATTPEGEIYFINHAARTTSWFDPRIPQHLQRTPTSGGAAGGGWANASIQACQQLRLQSLQLERE RLKQRQEQEIRLQQLMARQSSSIVSSLASSATTELPDPLSGLTDHQEQESADSGLMAVTSYSMPHTPEDFL

AGMDDRMDCCTSEAGANLDTADITLGDITDDLVPSSLQLGFEFTNDILLDDVQSLINSTPNKPDNVLTLWL  
PLRMRQLPKSFFNPP

rs:XP\_015244037 [XP\_015244037] PREDICTED: transcriptional coactivator  
YAP1 [Cyprinodon variegatus]. 45..59

MDPNQHNPAGHQIVHVRGDSQTDLELLFNFSVMNPKNSNAPASLPMRMRKLPDSFFKPPPEPKSHSRQAS  
TDAGSGGVLTPHHVRAHSSPASLQLGAVSGGSLSGMASAGASPOHLRQSSYEIPDEMLPAGWEMAKTPSGQRYF  
LNHIDKTTTQDPRKSLQLNQPAPPSTVPVQPPNLLNPANGPLPEGWEQAMTPEGEIYYINHKNKTTSWLDPRL  
EPRYALNQQRITQSAPVKQSGQLPSSTHGGVMGGNNQLRLQOIEKERLRLQQHRPQELALRNQLPTSMDQDGSTN  
PVSSPLAQDARTMTVNSSDPFLNSGTYHSRDESTDSGLSMSSYSVPRTPDFFLNSVDEMDTGDPLPPSIATQPNR  
FPDYLDIAPGTDVLDLGTLESESMAVESEELMASLQEPSSDILSDMESVLAATKIDKENFLTWL  
PMRMRKLPDSFFKPP

rs:XP\_015246868 [XP\_015246868] PREDICTED: protein **FAM181B** [Cyprinodon  
variegatus]. 155..169

MAVQTAIMNPQFMSCFPDVSMEYDMEKSLDCSLLCEAENDEDFKETTRDLSFIDSASSNIKLALDKP  
VKSKRKNVHRKYLQKQIKRCTGIISPNGTSEAPVKRQSSPVNQOGLQSKTLQKREGGQANLQSKSLAALFSPVK  
EIRGEKAKKPLRHRNLPPSFFTEPANCSRVSSTSGMMLKDLERGNPEAAEFFELLGPDYSNMVNEQDVYQAMPL  
RVQQDLGLDPASYDHLVSGLLYPDPWTNCSGPKKPGEGRLTGPPQLPGYGQAEDPSGPIDDSGLCTLAFFSFF  
PDCSIPQVTYDLNGGYNKTNYPCPL PLRHRNLPPSFFTEP

rs:XP\_015251719 [XP\_015251719] PREDICTED: transcriptional coactivator  
YAP1-like isoform X1 [Cyprinodon variegatus].>rs:XP\_015251720  
[XP\_015251720] PREDICTED: transcriptional coactivator YAP1-like isoform X1  
[Cyprinodon variegatus]. 46..60

MDAHRGAPPAGQOVVHVRGDSKTELEALFSAVMNPSKAARQPHSVPMRMRKLPDSFFKPPPEPRGHSRQA  
SSDGGVCGSLAPHHVRAHSSPASLPVNSLSAQVDADAAATPLIPDDVPLPDGWEMAKTSTGQRYFINHVHKT  
QDPRLSQLQSAAAQHQIACPIHAHSFSNPAPTTQPKNVIPEAGPLPEGWEQAVTADGEMYYIDHINKTTTWD  
RLAQKANPTMLSLAMQORQEKLRQKQILPQFAPQAEAGSSNQMPGGMDHRSQAQMLVPSVDVIRALNQE  
PNLNGAHSRNESTDSGLSVSSLPRTSDHMLGSVDHMDTGSSDPPSMSLQEPMPVLPINEELMPGIPDGLTSD  
ILMDMDTVLSGPHMDRDSLLTLWL PMRMRKLPDSFFKPP

rs:XP\_015251722 [XP\_015251722] PREDICTED: transcriptional coactivator  
YAP1-like isoform X2 [Cyprinodon variegatus]. 46..60

MDAHRGAPPAGQOVVHVRGDSKTELEALFSAVMNPSKAARQPHSVPMRMRKLPDSFFKPPPEPRGHSRQA  
SSDGGVCGSLAPHHVRAHSSPASLPVNSLSAQVDADAAATPLIPDDVPLPDGWEMAKTSTGQRYFINHVHKT  
QDPRLSQLQSAAAQHQIACPIHAHSFSNPAPTTQPKNVIPEAQKANPTMLSLAMQORQEKLRQKQILPQFAP  
QAEAGSSNQMPGGMDHRSQAQMLVPSVDVIRALNQEPNLNGAHSRNESTDSGLSVSSLPRTSDHMLGSVDH  
MDTGSSDPPSMSLQEPMPVLPINEELMPGIPDGLTSDILMDMDTVLSGPHMDRDSLLTLWL PMRMRKLPDS  
FFKPP

rs:XP\_015252583 [XP\_015252583] PREDICTED: protein **FAM181A** [Cyprinodon  
variegatus]. 102..116

MSSADSEVKTLNLFVNLAASSDIKAALDKSAPCRRSVDHRKYLQKQLKRFSQKFSRVPRCQTLRSADYRC  
TRGAGAERQMGKVIDKSSDAQQSVGGVMEQVPMRKRQLPASFWEEPRLIKAKRDISCMDLRGSSTGSDGSEDEK  
RKRSQDDAPKTPKTTISSSKRGSADKEVLKLDLTSVHVCFCGCWPFQFHENQVLHSQLVVPHPMGLWSKPAGE  
ELERSEHPYQKLRHRVVKPIPTKPTAHSPIFSVGFIPMRKRQLPASFWEEP

rs:XP\_015279990 [XP\_015279990] PREDICTED: transcriptional coactivator  
YAP1 [Gekko japonicus]. 85..99

MDPAGQPQPPSAASQQAASQPPSGQPPQAAGAPPQPPQPPGAVSGAPPAGHQIVHVRGDSQTDLEALF  
NAVMNPKGANVPHTLPMRLRKLPLDSFFKPPPEPKAHSRQASTDAGTAGTLTPQHVRHSSPASLQLGTVSPGTLPP  
TGVISGSPSSQHLRQPSFEIPDDVPLPPGWEMAKTPSGQRYFLNHIDQTTTQDPRKALLSGLNVTAPTSPPLQ  
QNIINSASGPLPDGWEQAMTQDGEIYYINHKNKTTSWLDPRLDPRFAMSQRISQSAPMKQPPPLAPQSPGGVLG  
SGSSNQQQMRLQQLQVEKERLRLKHQELLRQALRNINPSTANSRQFQLLYGGGRIELHGQMLLHCANISQDL  
VLCLELFKEYRFSGTNLLDKQVVHARGQIVAIIDLEFHNFSAFYSS PMRLRKLPLDSFFKPP

rs:XP\_015263365 [XP\_015263365] PREDICTED: protein **FAM181B** [Gekko  
japonicus]. 228..242

MAVQAATLHAHPFAVPPFCFPAAAGLADFGAEKGYDDSGALLLAGGGGGGSDPGDREATRDLLSFID

SASSNIKLALDKPVKSKRKVNHRKYLQKQIKRCTGMIGAGGGGGGAPATPGLQDAPTISANSVHSNNSNHSQP  
ANKRTSPTTGAPPASASPPAGGAAHCKAPAKREGGTLQSESLAALFDSLQQPSGFAPERPPGAAGPAGGREGGSG  
PSAGGKKVPLRKRNLPPSFFTEPAAARSTAPPSPLKDPAGPEELFDLLAASPEFGNLLPEQPPPLFQTGGRLQ  
TSDLGGETPLYESLPLPHLMYPEPPLRPLPALYAGASDPAGAESSPTAHLPSFAPFFPDCLPPPPAMPYDYPA  
GYSRGGALF PLRKRNLPPSFFTEP

rs:XP\_015281466 [XP\_015281466] PREDICTED: protein **FAM181A** [Gekko japonicus]. 140..154

MASADSEVKTLNLFVNLAASDIKAALDKSAPCRRSVDHRKYLQKQLKRFSQKYARLPRGHHHHHHLPPP  
PPPHARERRAAEERARGPSADAAETPVGQSSGGALLSHNGEPKACNKAAPGDERQOSACEATSRPDQVPMRKR  
QLPASFWEEPRPAPGPLGVSAGAFPTAAPPPASSSSKDLPLYEGKSKKAPDGGQAAAAPDSPSSGPDAAEATVKVL  
SAWSCCPFQCHGPQASPLYPSALSALPPAAPFPALGLWRKSAASSTEGEGFCKPSGGGAGQKVHRPVVWKP  
TKPAAPPPIFSVFGYI PMRKRQLPASFWEEP

rs:XP\_015519255 [XP\_015519255] PREDICTED: transcriptional coactivator yorkie [Neodiprion lecontei]. 45..59

MALNQDVDQLKSSLVVRIDQNSESDLQALFDSVLKPDAGRPLQVPLRMRNLNSFFNPPSTGSKSPSIS  
HSRENSADSAFGATGGGGGGGGGGGAAGGSTAPGSGCVSSGTTGAAGSCTTSAAGTPGSVVGSVAGVVVGASGA  
GSNNGGLTVSHPRAHSSPASLQOTYASAOQSQOHIPOPHPRHHHHKQRSYDVIISTVDDLGLPLPPGWEQARTPEGQ  
VYFLNHMTRTTTTWEDPRKTAASVAVAVAVESGTKNSSAATSSLGPLPDGWEQARTPEGEIYFINHQTRTTSW  
FDPRIPTHLQRAPTSGAMLQOTWLOQPGAATIQSSQTIQACQRLHSLQLERERLQORQOQEIIMRQOELMRQTTEV  
AMDPFLLSGINEQHARQESADSGGLGTAYSLPHTPEDFLANIDNMDGRSEGAPMETPDLSTLSDNIDSTDDLVP  
SLQLGEDFTSDILDDVQSLINPNTSKSENVLTWL PLRMRNLNSFFNPP

rs:XP\_006983846 [XP\_006983846] PREDICTED: transcriptional coactivator YAP1 [Peromyscus maniculatus bairdii]. 13..27

MNPKTANVPQTPMRLRKLKLPDSFFKPEPKSHSRQASTDAGTAGALTPQHVAHSSPASLQLGAVSPGT  
LTPSVVPGPAAAPAAQHLRQSSFEIPDDVPLPAGWEMAKTSSGQRYFLNHIDQTTTWDQPRKAMLSQLNVPAPAS  
PAVPQTLMNSASGPLPDGWEQAMTQDGDVYYINHKNKTTSWLDRPDRFAMNQRIQOSAPVKQPPPLAPQSPQG  
GVLGGGNSNQOQMQLOQLQMEKERLRLKQOELLRQAIRNINPSTANAPKCQELALRSQLPTLEQDGGTQNAVSS  
PGMSQELRMTTNSSDPFLNSGTYHSRDESTDSGLSMSSYSVPRTPDDFLNSVDEMDTGDITINQSTLPSQQSRFP  
DYLEAIPGTNVDLGTLEGDAMNIEGEELMPSLQREALSSDILNDMESVLAATKLDKESFLTWL  
PMRLRKLKLPDSFFKPP

rs:XP\_006990968 [XP\_006990968] PREDICTED: protein **FAM181A** [Peromyscus maniculatus bairdii]. 129..143

MAADSDVKMLNLFVNLAASDIKAALDKSAPCRRSVDHRKYLQKQLKRFSQKYSRLPRGLPGRVTEPHLQ  
RGPEERPGQLPLHPCPESSPGGGGCKEVLGTPFREECLSKEQSFGGLNPEAARPGQLPMRKRQLPASFWEEP  
PTLSYPMGLEVLGPRETSLYENKKNCKGLES LGPETAPLPMSPRVLADMEPLKMPGVSLVGS LDAWSYCPFYH  
GQPIFPSLPGVLPQGPVPSLGLWRKSPASPVELAHFCKDQVSPGPKVYRVPVVKPIPTKAMPPIIFNVFGYL  
PMRKRQLPASFWEEP

rs:XP\_006991949 [XP\_006991949] PREDICTED: protein **FAM181B** [Peromyscus maniculatus bairdii]. 218..232

MAVQAALLSSHPFIPFGFGGSADGLVSAFGSLDKGCCFEDDES GAPAGALLSGSEGGDVREATRDLLSF  
IDSASSNIKLALDKPGKSKRKVNHRKYLQKQIKRCSGLMGTAPPGPPSPAADAPAKRPPGAPGAPTVAAPAHCK  
ATPRREATQAAAAASLQSRSLAALFDSLHQVPGGAEPAGGAVAVVPVPLGAASAAGDGAGTAGNSAASGTRKVPL  
RARNLPPSFFTEPSRVGGCGGPGSGQVSLGDLEKGAEEAFFELLAPDFGAGTDSGALLAAEPLDAFPAGATVL  
RGPLELES GPFEPPAMVGNLLYPEPWSAPTCPQTKKPLVGVRCGVTLNEPVRFLYPTALDSPGGEDTPALTSFA  
PFFPDICALPPPHQVSYDYSAGYSRAVYPSLWRPDGVWEGASGEDGAHPD PLRARNLPPSFFTEP

rs:XP\_007664995 [XP\_007664995] PREDICTED: protein **FAM181B**, partial [Ornithorhynchus anatinus]. 142..156

FIDSASCNIKMALDKPGKSKRKVNHRKYLQKQIKRCTGMASSTPGPSAPGPSSTPGSSTAASEVPPRRPP  
AASPPAAASGTPAAQGRTPPPRREGGQAAAALQSRSLAALFDSLHPPRRGAPPAPAAAAPRASAGSPGPAKKLPLR  
HRNLPPSFFTEPTQARGLREPEKGGGEPAAEFFDLLGPDYGGAQLEPALFEGHPAVDVSYCGAASRGKM  
PLRHRNLPPSFFTEP

rs:XP\_007667539 [XP\_007667539] PREDICTED: protein **FAM181A**  
[Ornithorhynchus anatinus].>rs:XP\_007667540 [XP\_007667540] PREDICTED:  
protein **FAM181A** [Ornithorhynchus anatinus]. 125..139

MASDSEVKMLLNFNVLASSDIKAALDKSAPCRRSVDHRKYLQKQLKRFSQKYSRNPRCHPGKTAEPHPK  
KAAEEGRPRGAPADGVDHRRGCGEKASGKSETPEQSTQARALRDQSPGAARPDHVPMRKRQLPASFWEEPRAQS  
FPAGPDGLLAPGEVKKSKKDLEGAGPESASVAGAPRGEKESKIPGAPLSSRANTWSCCFQYHGQPVFQGPAL  
PQSPAPAPGLGPWRKSSAAPGDLMPFCKESSGATQKVYRPVVLKPIPTKPAVPPPIFNVFGYI  
PMRKRQLPASFWEEP

rs:XP\_970492 [XP\_970492] PREDICTED: transcriptional coactivator YAP1-A  
isoform X1 [Tribolium castaneum].>tr:D6W803\_TRICA [D6W803] SubName:  
Full=Yorkie homolog-like Protein {ECO:0000313|EMBL:EFA11163.1}; 41..55

MALNQDEGKQVLRVDQDSETDLQALFDSVLKPDSCRPLQVPWMSMRKLPDSFFNPPSTGSKSINHSRENS  
VDSAFSSAASASGSSTAAAAAPAPLPSAHHRAHSSPASLQQTAYAVGQAQATHHHIKQRSYDVASKVEDNTPLPTG  
WEQARTPEGQLYYLNHITRTTTTWEDPRKSLAAQAAAQQHQSAEQLLSSHQVSQAQAPNSTPPAKVSTDVDLGLPL  
EGWEQAQTPEGEIYFINHQTRTTSWFDPRIPTHLLQQRSPGTASVSGQSWPSGSLSQSSPAKQQQFRLQLLQFERD  
RLKLRQQEIRMQQELMMRGSSNDLALDPFLNDHSRQESADSGLGLGTTYSMPHTPEDFFDCTEDLVPSSLQLGEEF  
PTDLGEEFPTVILDDDQVSLINPPTTKPDNVLIWL PWSMRKLPDSFFNPP

rs:XP\_008200710 [XP\_008200710] PREDICTED: transcriptional coactivator  
YAP1 isoform X2 [Tribolium castaneum]. 41..55

MALNQDEGKQVLRVDQDSETDLQALFDSVLKPDSCRPLQVPWMSMRKLPDSFFNPPSTGSKSINHSRENS  
VDSAFSSAASASGSSTAAAAAPAPLPSAHHRAHSSPASLQQTAYAVGQAQATHHHIKQRSYDVASKVEDNTPLPTG  
WEQARTPEGQLYYLNHITRTTTTWEDPRKSLAAQAAAQQHQSAEQLLSSHQVSQAQAPNSTPPHLLQQRSPGTASV  
SGQSWPSGSLSQSSPAKQQQFRLQLLQFERDRLKLRQQEIRMQQELMMRGSSNDLALDPFLNDHSRQESADSGL  
LGTYSMPHTPEDFFDCTEDLVPSSLQLGEEFPTDLGEEFPTVILDDDQVSLINPPTTKPDNVLIWL  
PWSMRKLPDSFFNPP

rs:XP\_025425738 [XP\_025425738] transcriptional coactivator YAP1 [Sipha  
flava]. 73..87

MSGLQQQQQQQQQQEQVTIKMEPSDPSSPATAVAAAINNVLVVRVDQDSETDLQALFDTVLKPDGKKP  
LQLPLMRQLPKSFFNPPSTGSKSSSISHSRENSGDSAFGTAPSIGQSCVAGGGPGPMHSAHSSPASLQQTAYGV  
SAAKQQQQQHVQKRSYDVSSAIDELGPLPQGWQARTPEGQIYFLNHLTRTTQWEDPRKSLAAQAAHQHRSQAEQ  
LLSPGNDSGSSTNATSTPTNSPPHIHSTLQGTNKNVTLGPLPDGWEQAVTVDGETYFINHIARTTSWFDPRI PAH  
LQRAPTS GAVLPSGSASWLLNGGSGLSQSLQVTQOKLRLHSLQMERERLKLKLRQQEIRQQELMLHSGQTTNDLDP  
FLSCSSSNVDHSRQESADSGLGLGNYSLPHTPEDFLSSNMDDNMDCTSESDNPGPSSDMSVVDVSDQEMASLDVTD  
DLVPSLQLGDEFNSDILDEVQSLIDPNNKPGSILTWL PLRMRQLPKSFFNPP

rs:XP\_015989479 [XP\_015989479] PREDICTED: transcriptional coactivator  
YAP1 isoform X1 [Rousettus aegyptiacus]. 85..99

MDPGQQPPPPQAPQGGQPPAQPPQGGPPSGPGQPAPPGSQAASQAPPAGHQIVHVRGDSETDLEALF  
NAVMNPKTANVPQTVPMRLRKLKLPDSFFKPPPEPKSHSRQASTDAGTAGALTPQHVRHSSPASLQLGAVSPGALTP  
TGVVSGPAATPTAQHLRQSSFEIPDDVPLPAGWEMAKTSSGQRYFLNHIDQTTTWQDPRKAMLSQINVTAPTSP  
VQQNMMNSASGPLPDGWEQAVTQDGEIYYINHKNTTSLWLDPRLDPRFGKAMNQRISQSAPVKQPPPLAPQSPQG  
GVMGGGNSNQQQMRLQQLQMEKERLRLKQQELLRQVRPQAMRNINPSTANSKPCQELALRSQLEPTLEQDGGTQN  
PVSSPGMSQELRTMTTNSSDPFLNSGTYHSRDESTDSGLSMSSYSVPRTPDDFLNSVDEMDTGD TINQSTLPSQQ  
NRFPDYLEAIPGTNVDLGTLEGDMNIEGEELMPSLQEQALSSDILNDMESVLAATKLDKESFLTWL  
PMRLRKLKLPDSFFKPP

rs:XP\_015989481 [XP\_015989481] PREDICTED: transcriptional coactivator  
YAP1 isoform X2 [Rousettus aegyptiacus]. 85..99

MDPGQQPPPPQAPQGGQPPAQPPQGGPPSGPGQPAPPGSQAASQAPPAGHQIVHVRGDSETDLEALF  
NAVMNPKTANVPQTVPMRLRKLKLPDSFFKPPPEPKSHSRQASTDAGTAGALTPQHVRHSSPASLQLGAVSPGALTP  
TGVVSGPAATPTAQHLRQSSFEIPDDVPLPAGWEMAKTSSGQRYFLNHIDQTTTWQDPRKAMLSQINVTAPTSP  
VQQNMMNSASGPLPDGWEQAVTQDGEIYYINHKNTTSLWLDPRLDPRFAMNQRISQSAPVKQPPPLAPQSPQGGV  
MGGGNSNQQQMRLQQLQMEKERLRLKQQELLRQVRPQAMRNINPSTANSKPCQELALRSQLEPTLEQDGGTQNPV  
SSPGMSQELRTMTTNSSDPFLNSGTYHSRDESTDSGLSMSSYSVPRTPDDFLNSVDEMDTGD TINQSTLPSQQNR  
FPDYLEAIPGTNVDLGTLEGDMNIEGEELMPSLQEQALSSDILNDMESVLAATKLDKESFLTWL  
PMRLRKLKLPDSFFKPP

rs:XP\_015989482 [XP\_015989482] PREDICTED: transcriptional coactivator  
YAP1 isoform X3 [Rousettus aegyptiacus]. 85..99

MDPGQQPPPPQAPQGGQPPAQQPPQGGPPSGPGQPAPPGSQAASQAPPAGHQIVHVRGDSETDLEALF  
NAVMPKNTANVPQTVPMRLRKLKLPDSFFKPPPEPKSHSRQASTDAGTAGALTPQHVRHSSPASLQLGAVSPGALTP  
TGVVSGPAATPTAQHLRQSSFEIPDDVPLPAGWEMAKTSSGQRYFLNHIDQTTTWQDPRKAMLSQINVTAPTSP  
VQQNMMNSASGPLPDGWEQAVTQDGEIYYINHKNTTSWLDPRLDPRFGKAMNQRISQSAPVKQPPPLAPQSPQG  
GVMGGGNSNQQQQMRLQQLQMEKERLRLKQOELLRQAMRNINPSTANSKQELALRSQLEQDGGTQNPVSS  
PGMSQELRTMTTNSSDPFLNSGTYHSRDESTDSGLSMSSYSVPRTPDDFLNSVDEMDTGDITINQSTLPSQQNRFP  
DYLEAIPGTNVDLGTLEGDGMNIEGEEELMPSLQEQALSSDILNDMESVLAATKLDKESFLTWL  
PMRLRKLKLPDSFFKPP

rs:XP\_015989483 [XP\_015989483] PREDICTED: transcriptional coactivator  
YAP1 isoform X4 [Rousettus aegyptiacus]. 85..99

MDPGQQPPPPQAPQGGQPPAQQPPQGGPPSGPGQPAPPGSQAASQAPPAGHQIVHVRGDSETDLEALF  
NAVMPKNTANVPQTVPMRLRKLKLPDSFFKPPPEPKSHSRQASTDAGTAGALTPQHVRHSSPASLQLGAVSPGALTP  
TGVVSGPAATPTAQHLRQSSFEIPDDVPLPAGWEMAKTSSGQRYFLNHIDQTTTWQDPRKAMLSQINVTAPTSP  
VQQNMMNSASGPLPDGWEQAVTQDGEIYYINHKNTTSWLDPRLDPRFAMNQRISQSAPVKQPPPLAPQSPGGV  
MGGGNSNQQQQMRLQQLQMEKERLRLKQOELLRQAMRNINPSTANSKQELALRSQLEQDGGTQNPVSSPG  
MSQELRTMTTNSSDPFLNSGTYHSRDESTDSGLSMSSYSVPRTPDDFLNSVDEMDTGDITINQSTLPSQQNRFPDY  
LEAIPGTNVDLGTLEGDGMNIEGEEELMPSLQEQALSSDILNDMESVLAATKLDKESFLTWL  
PMRLRKLKLPDSFFKPP

rs:XP\_015989484 [XP\_015989484] PREDICTED: transcriptional coactivator  
YAP1 isoform X5 [Rousettus aegyptiacus]. 85..99

MDPGQQPPPPQAPQGGQPPAQQPPQGGPPSGPGQPAPPGSQAASQAPPAGHQIVHVRGDSETDLEALF  
NAVMPKNTANVPQTVPMRLRKLKLPDSFFKPPPEPKSHSRQASTDAGTAGALTPQHVRHSSPASLQLGAVSPGALTP  
TGVVSGPAATPTAQHLRQSSFEIPDDVPLPAGWEMAKTSSGQRYFLNHIDQTTTWQDPRKAMLSQINVTAPTSP  
VQQNMMNSASGPLPDGWEQAVTQDGEIYYINHKNTTSWLDPRLDPRFGKAMNQRISQSAPVKQPPPLAPQSPQG  
GVMGGGNSNQQQQMRLQQLQMEKERLRLKQOELLRQVRPQELALRSQLEQDGGTQNPVSSPGMSQELRTMTT  
NSSDPFLNSGTYHSRDESTDSGLSMSSYSVPRTPDDFLNSVDEMDTGDITINQSTLPSQQNRFPDYLEAIPGTNVD  
LGTLEGDGMNIEGEEELMPSLQEQALSSDILNDMESVLAATKLDKESFLTWL PMRLRKLKLPDSFFKPP

rs:XP\_015989485 [XP\_015989485] PREDICTED: transcriptional coactivator  
YAP1 isoform X6 [Rousettus aegyptiacus]. 85..99

MDPGQQPPPPQAPQGGQPPAQQPPQGGPPSGPGQPAPPGSQAASQAPPAGHQIVHVRGDSETDLEALF  
NAVMPKNTANVPQTVPMRLRKLKLPDSFFKPPPEPKSHSRQASTDAGTAGALTPQHVRHSSPASLQLGAVSPGALTP  
TGVVSGPAATPTAQHLRQSSFEIPDDVPLPAGWEMAKTSSGQRYFLNHIDQTTTWQDPRKAMLSQINVTAPTSP  
VQQNMMNSASGPLPDGWEQAVTQDGEIYYINHKNTTSWLDPRLDPRFAMNQRISQSAPVKQPPPLAPQSPGGV  
MGGGNSNQQQQMRLQQLQMEKERLRLKQOELLRQVRPQELALRSQLEQDGGTQNPVSSPGMSQELRTMTTNS  
SDPFLNSGTYHSRDESTDSGLSMSSYSVPRTPDDFLNSVDEMDTGDITINQSTLPSQQNRFPDYLEAIPGTNVDL  
GTLEGDGMNIEGEEELMPSLQEQALSSDILNDMESVLAATKLDKESFLTWL PMRLRKLKLPDSFFKPP

rs:XP\_015989486 [XP\_015989486] PREDICTED: transcriptional coactivator  
YAP1 isoform X7 [Rousettus aegyptiacus]. 85..99

MDPGQQPPPPQAPQGGQPPAQQPPQGGPPSGPGQPAPPGSQAASQAPPAGHQIVHVRGDSETDLEALF  
NAVMPKNTANVPQTVPMRLRKLKLPDSFFKPPPEPKSHSRQASTDAGTAGALTPQHVRHSSPASLQLGAVSPGALTP  
TGVVSGPAATPTAQHLRQSSFEIPDDVPLPAGWEMAKTSSGQRYFLNHIDQTTTWQDPRKAMLSQINVTAPTSP  
VQQNMMNSASGPLPDGWEQAVTQDGEIYYINHKNTTSWLDPRLDPRFGKAMNQRISQSAPVKQPPPLAPQSPQG  
GVMGGGNSNQQQQMRLQQLQMEKERLRLKQOELLRQELALRSQLEQDGGTQNPVSSPGMSQELRTMTTNSSD  
PFLNSGTYHSRDESTDSGLSMSSYSVPRTPDDFLNSVDEMDTGDITINQSTLPSQQNRFPDYLEAIPGTNVDL  
GTLEGDGMNIEGEEELMPSLQEQALSSDILNDMESVLAATKLDKESFLTWL PMRLRKLKLPDSFFKPP

rs:XP\_015989487 [XP\_015989487] PREDICTED: transcriptional coactivator  
YAP1 isoform X8 [Rousettus aegyptiacus]. 85..99

MDPGQQPPPPQAPQGGQPPAQQPPQGGPPSGPGQPAPPGSQAASQAPPAGHQIVHVRGDSETDLEALF  
NAVMPKNTANVPQTVPMRLRKLKLPDSFFKPPPEPKSHSRQASTDAGTAGALTPQHVRHSSPASLQLGAVSPGALTP  
TGVVSGPAATPTAQHLRQSSFEIPDDVPLPAGWEMAKTSSGQRYFLNHIDQTTTWQDPRKAMLSQINVTAPTSP  
VQQNMMNSASGPLPDGWEQAVTQDGEIYYINHKNTTSWLDPRLDPRFAMNQRISQSAPVKQPPPLAPQSPGGV  
MGGGNSNQQQQMRLQQLQMEKERLRLKQOELLRQELALRSQLEQDGGTQNPVSSPGMSQELRTMTTNSSDPF

LNSGTYHSRDESTDSGLSMSSYSVPRTPDDFLNSVDEMDTGDGTINQSTLPSQQNRFPDYLEAIPGTNVDLGTLEG  
DGMNIEGEEMLPMSLQEQALSSDILNDMESVLAATKLDKESFLTWL PMRLRKLPSFFKPP

rs:XP\_016000922 [XP\_016000922] PREDICTED: protein **FAM181A** [Rousettus  
aegyptiacus]. 129..143

MASDSVDMKLLNFVNLASSDIKAALDKSAPCRRSVDHRKYLQKQLKRFSQKYSRLPRGLHGRGAEPHLK  
GGPEDRPRPPLDSGPDAGPGGCGGCKEKALGNPYREVCLAKEQILQGNPEVARPGQVPMRKRQLPASFWEEP  
PTHSYPVGLEGLGPRAGPPYEGKKHCKGLEPLGPEAARMSPRVPAPKEPLKMPGVSLVGRVNAWGCCPFQYH  
GQPSYPGPPGALPPGPVPSLGLWRKSSVSPGELAHFCKDVDGLGQKVYRPVVLKPIPTKALPPPPIFNVFGYL  
PMRKRQLPASFWEEP

rs:XP\_016015776 [XP\_016015776] PREDICTED: protein **FAM181B** [Rousettus  
aegyptiacus]. 221..235

MAVQAALLSTHPFVFPFGFGTDPDGLGGAFGALDKGCCFEDDETGTAAALLAGTEGGDVREATRDLLS  
IDSASSNIKALDKPGKSKRKVNHRKYLQKQIKRCSSLMGAAPPSPGAVDTPAKRVLAAPSAQTAAVPAHGK  
ATPRREASQAAAAASLQSRSLAALFDSLHHPGGAELAGGSVVAPAAGLRGAGAAGAGGDAAGPAGGAALPGCRK  
VPLRARNLPPSFFTEPSRAGGSGCGSPGPGVSLGDLEKGAETVEFFELLGPDYGPGETGVLLATEPLDVFPTG  
AAVLRGPQELEPGLFEPATVGSLLYPEPWSALGCPPTKKPNLAAPRGGSTLNEPLRSLYPATADSPGGEDGTG  
LLASFAPFFSDCALSPPHQVSYDYSAGYGRTAFSGLWRPDGVWEGAPGEEGAHRD PLRARNLPPSFFTEP

rs:XP\_011206098 [XP\_011206098] PREDICTED: transcriptional coactivator  
yorkie [Bactrocera dorsalis].>tr:A0A034W9G2\_BACDO [A0A034W9G2] SubName:  
Full=Protein yorkie {ECO:0000313|EMBL:JAC51349.1}; 59..73

MSLSKTVGSLNKGNAKEKSTSKESNNLVVRIDQSDNNLQALFDSVNLNPTESKCPQLQVPRMRQLPESF  
FKPPATASRSPVAHSRANSADSAYDTGSQPNVSQGNISTSSVAAPVATITQPQVTANRLSISHSRAHSSPASLQ  
QTYNVHIGNVMETNACIQDGIQVFTTGAVPFPSPVNAAGAVRMEQGEQAVPKDAPNIQTFHMKQRSYDVVSTIQ  
LQNELGPLPPGWQAKTNDGQIYYLNHTTKSTQWEDPRIQLKQQIFQDGLSHNVNLKSKESVNLADNLGPLEGW  
EQAYTESGDVYFINHVNRRTSWNDPRIPDFLQKPVKSQKPGPSWLNQIHIEKEQDYFKPSSEQSSLTRQNGSLQM  
DPFLSGDNHARQESSDGLSLSSNTFSTTADLMPNIDDSMDCISESGSLNALSGIDCPDNLVSSLQLEDNICNEM  
FSDVHSMNLNASATKPDTLDWYKIN PFRMRQLPESFFKPP

rs:NP\_001182697 [NP\_001182697] transcriptional coactivator YAP1 [Xenopus  
tropicalis].>tr:E1CHM2\_XENTR [E1CHM2] SubName: Full=Yes-associated protein  
1 {ECO:0000313|EMBL:BAJ19431.1};>gp:AB551789\_1 [AB551789] Yes-associated  
protein 1 [Xenopus tropicalis] 51..65

MEPGSQPSAPAQPPAGHQIVHVRSDSETDLEALFNAVMPKNANVPQTLPMRMRKLPSFFKQPEPKS  
HSRQASTDGGAGALTPQHVRHSSPASLQLGAVSPGALSPPGVVPGPAPAPNAQHLRQSSYEIPDDVPLPPGWE  
MAKTSPGQRYFLNHMEQTTTQWQDPRKAMLSQINLPAPTSPPVQONIMTPTGPLPDGWEQALTPEGETYFINHKNK  
TTSWLDPRLDPRFAMNQRLSQSAPVKSPPALPPQSPQSGVLGSGGNQQQMLRQQLQMEKERLRLKHQELLRQVR  
PQELALRSQIPPMQDGGTQNPVCSTGISQEMRTMTMNSSDPFLNSGTYHSRDESTDSGLSMSSYSVPRTPDDFL  
NSVDEMDTGEAITQSTIPTQQRNFPDYLETLPGTNVDLGTLEGEAMNVEGEEMLPMSLQEQALSSDILNDMESVLA  
TKLDKESFLTWL PMRMRKLPSFFKQP

rs:XP\_009100036 [XP\_009100036] PREDICTED: protein **FAM181A** [Serinus  
canaria]. 127..141

MASDSEVKTLNFVNLASSDIKAALDKSAPCRRSVDHRKYLQKQLKRFSQKYSRIPRCHPSKPPECGWR  
RGAEDRARGPLPEAPEPSPHGGAAADKVMHTAEAEESLTGERVLQEQKPEAARPDQVPMRKRQLPASFWEEP  
QSLAARAFASPEGLQAPRDPYEGKSKRSPDAAGPESPPDTAPLAGEKDPAGALSGRVGWSWTCPPFCPPGPG  
VYQPPGALPPSPFPLGLWRKSVATLPAEVPPFCKEADGPGQKLYRPMVLKPIPTKPAIPPIFNVFGYL  
PMRKRQLPASFWEEP

rs:XP\_024831476 [XP\_024831476] transcriptional coactivator YAP1 isoform  
X1 [Bos taurus].>rs:XP\_027419731 [XP\_027419731] transcriptional coactivator  
YAP1 isoform X2 [Bos indicus x Bos taurus]. 84..98

MDPGPPPPQAPQGGQPPPAQAPQGGQPPSAPGQAPPPGPPAAPQAPPAGHQIVHVRGDSETDLEALFN  
AVMNPKTANVPQTVPMRLRKLPSFFKPPPEPKSHSRQASTDAGTAGALTPQHVRHSSPASLQLGAVSPGTLTPT  
GVVSGPAAAPAAQHLRQSSFEIPDDVPLPAGWEMAKTSSGQRYFLNHIDQTTTQWQDPRKAMLSQMNVTAPTSPPV  
QQNMMNSASGPLPDGWEQAMTQDGEIYYINHNKNTTSWLDPRLDPRFAMNQRLSQSAPVKSPPPLAPQSPQGGVL  
GGSSNQQQMLRQQLQMEKERLRLKHQELLRQVRPQAMRNINPSTANSPKCQELALRSQLPTLEQDGGTQNPVS

SPGMSQELRTMTTNSDPFLNSGTYHSRDESTDSGLSMSSYSVPRTPDFFLNSVDEMDTGDTINQSTLPSQQNRF  
PDYLEAIPGTNVDLGTLEGDGMNIEGELMPSLQEQALSSDILNDMESVLAATKLDKESFLTWL  
PMRLRKLPSFFKPP

rs:XP\_024831477 [XP\_024831477] transcriptional coactivator YAP1 isoform  
X2 [Bos taurus].>rs:XP\_027419733 [XP\_027419733] transcriptional coactivator  
YAP1 isoform X4 [Bos indicus x Bos taurus]. 84..98

MDPGPPPPQAPQGGQPPPAQAPQGGQPPSAPGQPAPPPGPPAAPQAPPAGHQIVHVRGDSETDLEALFN  
AVMNPKTANVPQTVPMRLRKLPSFFKPPPEPKSHSRQASTDAGTAGALTPQHVRHSSPASLQLGAVSPGTLTPT  
GVVSGPAAAPAAQHLRQSSFEIPDDVPLPAGWEMAKTSSGQRYFLNHIDQTTTWQDPRKAMLSQMNVTAPTSPPV  
QQNMMNSASGPLPDGWEQAMTQDGEIYYINHKNKTTSWLDPRLDRPFAMNQRISQSAPVKQPPPLAPQSPQGGVL  
GGGSSNQQQMRLQQLQMEKERLRLKQEQELLRQAMRNINPSTANSPKCQELALRSQLPTLEQDGGTQNPVSSPGM  
SQELRTMTTNSDPFLNSGTYHSRDESTDSGLSMSSYSVPRTPDFFLNSVDEMDTGDTINQSTLPSQQNRFPDYL  
EAIPGTNVDLGTLEGDGMNIEGELMPSLQEQALSSDILNDMESVLAATKLDKESFLTWL  
PMRLRKLPSFFKPP

rs:XP\_024831478 [XP\_024831478] transcriptional coactivator YAP1 isoform  
X3 [Bos taurus].>rs:XP\_027419736 [XP\_027419736] transcriptional coactivator  
YAP1 isoform X6 [Bos indicus x Bos taurus]. 84..98

MDPGPPPPQAPQGGQPPPAQAPQGGQPPSAPGQPAPPPGPPAAPQAPPAGHQIVHVRGDSETDLEALFN  
AVMNPKTANVPQTVPMRLRKLPSFFKPPPEPKSHSRQASTDAGTAGALTPQHVRHSSPASLQLGAVSPGTLTPT  
GVVSGPAAAPAAQHLRQSSFEIPDDVPLPAGWEMAKTSSGQRYFLNHIDQTTTWQDPRKAMLSQMNVTAPTSPPV  
QQNMMNSASGPLPDGWEQAMTQDGEIYYINHKNKTTSWLDPRLDRPFAMNQRISQSAPVKQPPPLAPQSPQGGVL  
GGGSSNQQQMRLQQLQMEKERLRLKQEQELLRQVVRPQELALRSQLPTLEQDGGTQNPVSSPGMSQELRTMTTNS  
DPFLNSGTYHSRDESTDSGLSMSSYSVPRTPDFFLNSVDEMDTGDTINQSTLPSQQNRFPDYLEAIPGTNVDLGT  
LEGDGMNIEGELMPSLQEQALSSDILNDMESVLAATKLDKESFLTWL PMRLRKLPSFFKPP

rs:XP\_024831479 [XP\_024831479] transcriptional coactivator YAP1 isoform  
X4 [Bos taurus].>rs:XP\_027419738 [XP\_027419738] transcriptional coactivator  
YAP1 isoform X8 [Bos indicus x Bos taurus]. 84..98

MDPGPPPPQAPQGGQPPPAQAPQGGQPPSAPGQPAPPPGPPAAPQAPPAGHQIVHVRGDSETDLEALFN  
AVMNPKTANVPQTVPMRLRKLPSFFKPPPEPKSHSRQASTDAGTAGALTPQHVRHSSPASLQLGAVSPGTLTPT  
GVVSGPAAAPAAQHLRQSSFEIPDDVPLPAGWEMAKTSSGQRYFLNHIDQTTTWQDPRKAMLSQMNVTAPTSPPV  
QQNMMNSASGPLPDGWEQAMTQDGEIYYINHKNKTTSWLDPRLDRPFAMNQRISQSAPVKQPPPLAPQSPQGGVL  
GGGSSNQQQMRLQQLQMEKERLRLKQEQELLRQELALRSQLPTLEQDGGTQNPVSSPGMSQELRTMTTNSDPFL  
NSGTYHSRDESTDSGLSMSSYSVPRTPDFFLNSVDEMDTGDTINQSTLPSQQNRFPDYLEAIPGTNVDLGTLEGD  
GMNIEGELMPSLQEQALSSDILNDMESVLAATKLDKESFLTWL PMRLRKLPSFFKPP

rs:XP\_024831480 [XP\_024831480] transcriptional coactivator YAP1 isoform  
X5 [Bos taurus].>rs:XP\_027419739 [XP\_027419739] transcriptional coactivator  
YAP1 isoform X9 [Bos indicus x Bos taurus]. 84..98

MDPGPPPPQAPQGGQPPPAQAPQGGQPPSAPGQPAPPPGPPAAPQAPPAGHQIVHVRGDSETDLEALFN  
AVMNPKTANVPQTVPMRLRKLPSFFKPPPEPKSHSRQASTDAGTAGALTPQHVRHSSPASLQLGAVSPGTLTPT  
GVVSGPAAAPAAQHLRQSSFEIPDDVPLPAGWEMAKTSSGQRYFLNHIDQTTTWQDPRKAMLSQMNVTAPTSPPV  
QQNMMNSASAMNQRISQSAPVKQPPPLAPQSPQGGVLGGGSSNQQQMRLQQLQMEKERLRLKQEQELLRQVVRPQA  
MRNINPSTANSPKCQELALRSQLPTLEQDGGTQNPVSSPGMSQELRTMTTNSDPFLNSGTYHSRDESTDSGLSM  
SSYSVPRTPDFFLNSVDEMDTGDTINQSTLPSQQNRFPDYLEAIPGTNVDLGTLEGDGMNIEGELMPSLQEQALS  
SDILNDMESVLAATKLDKESFLTWL PMRLRKLPSFFKPP

rs:XP\_024831481 [XP\_024831481] transcriptional coactivator YAP1 isoform  
X6 [Bos taurus].>rs:XP\_027419740 [XP\_027419740] transcriptional coactivator  
YAP1 isoform X10 [Bos indicus x Bos taurus]. 84..98

MDPGPPPPQAPQGGQPPPAQAPQGGQPPSAPGQPAPPPGPPAAPQAPPAGHQIVHVRGDSETDLEALFN  
AVMNPKTANVPQTVPMRLRKLPSFFKPPPEPKSHSRQASTDAGTAGALTPQHVRHSSPASLQLGAVSPGTLTPT  
GVVSGPAAAPAAQHLRQSSFEIPDDVPLPAGWEMAKTSSGQRYFLNHIDQTTTWQDPRKAMLSQMNVTAPTSPPV  
QQNMMNSASAMNQRISQSAPVKQPPPLAPQSPQGGVLGGGSSNQQQMRLQQLQMEKERLRLKQEQELLRQAMRNI  
NPSTANSPKCQELALRSQLPTLEQDGGTQNPVSSPGMSQELRTMTTNSDPFLNSGTYHSRDESTDSGLSMSSYS  
VPRTPDFFLNSVDEMDTGDTINQSTLPSQQNRFPDYLEAIPGTNVDLGTLEGDGMNIEGELMPSLQEQALSSDIL  
NDMESVLAATKLDKESFLTWL PMRLRKLPSFFKPP

rs:XP\_024831482 [XP\_024831482] transcriptional coactivator YAP1 isoform X7 [Bos taurus].>rs:XP\_027419741 [XP\_027419741] transcriptional coactivator YAP1 isoform X11 [Bos indicus x Bos taurus]. 84..98

MDPGPPPPQAPQGGQPPPAQAPQGGQPPSAPGQPAPPQPPAAPPAGHQIVHVRGDSETDLEALFN  
AVMNPKTANVPQTVPMRLRKLKLPDSFFKPPPEPKSHSRQASTDAGTAGALTPQHVRHSSPASLQLGAVSPGTLTPT  
GVVSGPAAAPAAQHLRQSSFEIPDDVPLPAGWEMAKTSSGQRYFLNHIDQTTTWQDPRKAMLSQMNVTAPTSPV  
QQNMNSASAMNQRISQSAPVKQPPPLAPQSPQGGVLGGGSSNQQQMRLQQLQMEKERLRLKQQLRQVVRPQE  
LALRSQLPTLEQDGGTQNPVSSPGMSQELRTMTTNSDDPFLNSGTYHSRDESTDSGLSMSSYSVPRTPDFFLNSV  
DEMDTGDTINQSTLPSQQNRFPDYLEAIPGTNVDLGTLEGDGMNIEGEEELMPSLQEQALSSDILNDMESVLAATKL  
DKESFTWL PMRLRKLKLPDSFFKPP

rs:XP\_024831483 [XP\_024831483] transcriptional coactivator YAP1 isoform X8 [Bos taurus].>rs:XP\_027419742 [XP\_027419742] transcriptional coactivator YAP1 isoform X12 [Bos indicus x Bos taurus]. 84..98

MDPGPPPPQAPQGGQPPPAQAPQGGQPPSAPGQPAPPQPPAAPPAGHQIVHVRGDSETDLEALFN  
AVMNPKTANVPQTVPMRLRKLKLPDSFFKPPPEPKSHSRQASTDAGTAGALTPQHVRHSSPASLQLGAVSPGTLTPT  
GVVSGPAAAPAAQHLRQSSFEIPDDVPLPAGWEMAKTSSGQRYFLNHIDQTTTWQDPRKAMLSQMNVTAPTSPV  
QQNMNSASAMNQRISQSAPVKQPPPLAPQSPQGGVLGGGSSNQQQMRLQQLQMEKERLRLKQQLRQELALR  
SQLPTLEQDGGTQNPVSSPGMSQELRTMTTNSDDPFLNSGTYHSRDESTDSGLSMSSYSVPRTPDFFLNSVDEMD  
TGDTINQSTLPSQQNRFPDYLEAIPGTNVDLGTLEGDGMNIEGEEELMPSLQEQALSSDILNDMESVLAATKLDKES  
FLTWL PMRLRKLKLPDSFFKPP

rs:XP\_010815609 [XP\_010815609] protein **FAM181A** isoform X1 [Bos taurus].>rs:XP\_027377395 [XP\_027377395] protein **FAM181A** isoform X1 [Bos indicus x Bos taurus]. 240..254

MWERGRLLGMLCIWRGAPDWPEGPPAPGTRRPPFSPLEGGTTASSRTTELAKRAKPGPGLQHGGNLCR  
ATLAGARAPALSVGSVLFPGAASCLNPASSWKARCSGALVMASDSDVKMLLNFNVLASSDIKAALDKSAPCRRS  
VDHRKYLQKQLKRFSQKYSRRLPRGLPGRGAEPHLKRGPEDRPGRPLPLESGHGSSPGGGGGCKEKALGNLDREES  
LSKERTLHGPDPGAARPGQVPMRKRQLPASFWEEPRTHSYPVGLGGLGPREGPPYEGKKHCKGLEPLGPETTP  
VPTSPRAPAEKEPLKMPGVSLVGRVSAWCCPFQYHGQPVYPSPPGALPQSPMPSLGLWRKSAASPGELAHFCKD  
AEGPGQKVYRPVVLKPIPTKPAVPPPIFNVFGYL PMRKRQLPASFWEEP

rs:XP\_010815610 [XP\_010815610] protein **FAM181A** isoform X2 [Bos taurus].>rs:XP\_027377396 [XP\_027377396] protein **FAM181A** isoform X2 [Bos indicus x Bos taurus]. 230..244

MVPMVTICDGKECGNGAAACLGCFVSGEALLIGLRAPQLRGPVVLHSAHSRAAQLPAGPRSSPAAPSL  
AQVGSVLFPGAASCLNPASSWKARCSGALVMASDSDVKMLLNFNVLASSDIKAALDKSAPCRRSVDHRKYLQKQ  
LKRFSQKYSRRLPRGLPGRGAEPHLKRGPEDRPGRPLPLESGHGSSPGGGGGCKEKALGNLDREESLSKERTLHG  
PDGAARPGQVPMRKRQLPASFWEEPRTHSYPVGLGGLGPREGPPYEGKKHCKGLEPLGPETTPVPTSPRAPAE  
KEPLKMPGVSLVGRVSAWCCPFQYHGQPVYPSPPGALPQSPMPSLGLWRKSAASPGELAHFCKDAEGPGQKVY  
RPVVLKPIPTKPAVPPPIFNVFGYL PMRKRQLPASFWEEP

rs:XP\_024837885 [XP\_024837885] protein **FAM181A** isoform X3 [Bos taurus]. 130..144

MASDSDVKMLLNFNVLASSDIKAALDKSAPCRRSVDHRKYLQKQLKRFSQKYSRRLPRGLPGRGAEPHLK  
RGPEDRPGRPLPLESGHGSSPGGGGGCKEKALGNLDREESLSKERTLHGPDPGAARPGQVPMRKRQLPASFWEEP  
RPTHYPVGLGGLGPREGPPYEGKKHCKGLEPLGPETTPVPTSPRAPAEKEPLKMPGVSLVGRVSAWCCPFQY  
HGQPVYPSPPGALPQSPMPSLGLWRKSAASPGELAHFCKDAEGPGQKVYRPVVLKPIPTKPAVPPPIFNVFGYL  
PMRKRQLPASFWEEP

rs:XP\_020043968 [XP\_020043968] protein **FAM181A** [Castor canadensis]. 222..236

MRPLAPTPAQIISRYLTRIPLRCLERSGARVGFILFASRFVGLGEGMGVWLFQRDSNSLWCPPGQLCI  
LLGAAGPYQSSPSSWKALCSGPLVMAADSDVKMLLNFNVLASSDIKAALDKSAPCRRSVDHRKYLQKQLKRFSQR  
CSRLPRGLPGRVAEPDLKRGPEQPGRPLPHATSDDSPGGGGCKEKASGNPFREELSKPTLQGGQSLAAKPG  
QVPMRKRQLPASFWEEPRTHSYMRDLGRLGPREGPPFESKKNCKGLESIGPEIAPVSMSPRVLADKESLKM  
MSLVGRVDAWCCPFQYHGQPIFPCPPGALPQNPVPSLGLWRKSPALPGELAHFCRDMDDPGQKVCPRPVVLKPI  
TKPAVPSPIFNVFGYL PMRKRQLPASFWEEP



rs:XP\_016318830 [XP\_016318830] PREDICTED: protein **FAM181B**-like  
[Sinocyclocheilus anshuiensis]. 157..171

MAVQAAIMNSQFLNFCFPGSVMDYEVVEKGLGGLLGEVDCGGDFKETTDRDLLSFIDSASSNIKLALDK  
PVKSKRKVNHRKYLQKQIKRCTGIILPGTTPVQEPCKRQGSPTPTSNLSGKTPPKKDGMQASLQSKSLAALFNS  
AKDVRGERAKKPLRHRNLPPSFFTEPANSSRVSTSTSGMSLKDLEGTPEAAEFFELLGPDYSNMVSEQDLFHTA  
PIRIQQEVTVGPPEYDSSHFFVSGGFLYTEPWGTCSGTSKKSMDMRTVPVQPNLYTHTDLSGVSVPVEQSSPCALTF  
SNFFTDCSAPPVSYDLVNGYNRDNFSSL PLRHRNLPPSFFTEP

rs:XP\_016307523 [XP\_016307523] PREDICTED: transcriptional coactivator  
YAP1 isoform X1 [Sinocyclocheilus anshuiensis].45..59

MDPSQHNPPAGHQIVHVRGDSETDLEALFNAVMPKNAISPPSVPMRMRKLPDSFFKPPPEPKSHSRQAS  
TDAGTAGTLTPQHIRAHSSPASLQLGAVSPGTLSSMVPANPQPQHLRQSSYEIPDDVPLPPGWEMAKTPSGQRYF  
LNHNDQTTTWQDPRKALLQMNQAAPASVVPVQQQNIMNPASGVPDGEQAITSEGEIYYINHKNKTTSWLDPRL  
DPRYAMNQQRISQSAPVKQGSQQLPSSPQSGVLGGNNQIRLQQIQMEKERLRIKQELLRQRPQELALRNQLPTSME  
QDGGTQNPVSSPGMGQDARNMTTNSSDPFLNSGTYHSRDESTDSGLSMSSYSVPRTPDDFLNSVDEMETGDTLGP  
SSMATQPSRFPDYLDIAIPGTDVDLGTLEGESMAVEGEELMPSLQEQALSSDILNDMESVLAATKIDKENFLTWL  
PMRMRKLPDSFFKPP

rs:XP\_016307525 [XP\_016307525] PREDICTED: transcriptional coactivator  
YAP1 isoform X2 [Sinocyclocheilus anshuiensis].45..59

MDPSQHNPPAGHQIVHVRGDSETDLEALFNAVMPKNAISPPSVPMRMRKLPDSFFKPPPEPKSHSRQAS  
TDAGTAGTLTPQHIRAHSSPASLQLGAVSPGTLSSMVPANPQPQHLRQSSYEIPDDVPLPPGWEMAKTPSGQRYF  
LNHNDQTTTWQDPRKALLQMNQAAPASVVPVQQQNIMNPASAMNQQRISQSAPVKQGSQQLPSSPQSGVLGGNNQI  
RLQQIQMEKERLRIKQELLRQRPQELALRNQLPTSMEQDGGTQNPVSSPGMGQDARNMTTNSSDPFLNSGTYHSR  
DESTDSGLSMSSYSVPRTPDDFLNSVDEMETGDTLGPSSMATQPSRFPDYLDIAIPGTDVDLGTLEGESMAVEGEE  
LMPSLQEQALSSDILNDMESVLAATKIDKENFLTWL PMRMRKLPDSFFKPP

rs:XP\_016309011 [XP\_016309011] PREDICTED: uncharacterized protein  
LOC107663320 [Sinocyclocheilus anshuiensis]. 154..168

MAASVIRTLNLGLAKPFPPCFPAEDEEEETEYEEELREDSLEEEEDAVASESQDEEPWFSFDSPPNN  
AEMTNQLLRFAELISSDVQRYFGRSQDPDACDIYAEKPCRKVGGQRQRYADFIKVAASSQGEEPELSGLAELFQ  
DAQRKGRGLPMSQRRLPVSFWTEPFAQQLDMLGDTSMQDNSLSMINTSESSINTNTLSMFSSVCTMTSSSIS  
GTLSSSSTPDFSDLLAHWAMDRENPNFNCDYPLS PMSQRRLPVSFWTEP

rs:XP\_016340120 [XP\_016340120] PREDICTED: transcriptional coactivator  
YAP1-like isoform X1 [Sinocyclocheilus anshuiensis]. 45..59

MDPSQHNPPAGHQIVHVRGDSETDLEALFNAVMPKNTITPPSVPMRMRKLPDSFFKPPPEPKSHSRQAS  
TDAGTAGTLTPQHIRAHSSPASLQLGAVSPGTLSSMI PANAPPQHLRQSSYEIPDDVPLLPGWEMAKTPSGQRYF  
LNHNDQTTTWQDPRKALLQMNQATPASVVPVQQQNIMNPASGPLPDGEQAITSEGEIYYINHKNKTTSWLDPRL  
DPRYAMNQQRISQSAPVKQGSQQLPSSPQSGVLGGNNQIRLQQIQMEKERLRIKQELLRQRPQELALRNQLPTSME  
QDGGTQNPVSSPSMGQDSRNMTTNSSDPFLNSGTYHSRDESTDSGLSMSSYSVPRTPDDFLNSVDEMETGDSLGP  
SSMATQPSRFPDYLDIAIPGTDVDLGTLEGESMVVEGEELMPSLQEQALSSDILNDMESVLAATKIDKENFLTWL  
PMRMRKLPDSFFKPP

rs:XP\_016340121 [XP\_016340121] PREDICTED: transcriptional coactivator  
YAP1-like isoform X2 [Sinocyclocheilus anshuiensis]. 45..59

MDPSQHNPPAGHQIVHVRGDSETDLEALFNAVMPKNTITPPSVPMRMRKLPDSFFKPPPEPKSHSRQAS  
TDAGTAGTLTPQHIRAHSSPASLQLGAVSPGTLSSMI PANAPPQHLRQSSYEIPDDVPLLPGWEMAKTPSGQRYF  
LNHNDQTTTWQDPRKALLQMNQATPASVVPVQQQNIMNPASAMNQQRISQSAPVKQGSQQLPSSPQSGVLGGNNQI  
RLQQIQMEKERLRIKQELLRQRPQELALRNQLPTSMEQDGGTQNPVSSPSMGQDSRNMTTNSSDPFLNSGTYHSR  
DESTDSGLSMSSYSVPRTPDDFLNSVDEMETGDSLGPSSMATQPSRFPDYLDIAIPGTDVDLGTLEGESMVVEGEE  
LMPSLQEQALSSDILNDMESVLAATKIDKENFLTWL PMRMRKLPDSFFKPP

rs:XP\_016340478 [XP\_016340478] PREDICTED: protein **FAM181A**  
[Sinocyclocheilus anshuiensis]. 107..121

MASSDSEVKTLNLFVNLAASSDIKAALDRSAPCRRSVDHRKYLQKQLKRFSHRYAKMPRCHSHRNGDSAP  
AKLSEDKAPPGPGSGREERLNAEDGARSGQGQQAPTPMRKRQLPASFWKEPQSSSGSRERLERFLQSGHVRPPA  
VNGERSTTGFDLNLNPLLSGSAACACSCCSLPYRFLPHADAPLSSRAHVVIKPIPTKPSSSSSSSSSSVFVSFVGF  
FI PMRKRQLPASFWKEP

rs:NP\_001182655 [NP\_001182655] protein **FAM181A** [Mus musculus].>rs:XP\_006515383 [XP\_006515383] PREDICTED: protein **FAM181A** isoform X1 [Mus musculus].>rs:XP\_006515384 [XP\_006515384] PREDICTED: protein **FAM181A** isoform X1 [Mus musculus]. 129..143

MAADSDVKMLLNFNVLASSDIKAALDKSAPCRRSVDHRKYLQKQLKRFSQKYSRLPRGLPGRVAEPhLQ  
RGPEERPGRPPLHPCPQSSPGGGGSCTEKALGTFREECLSKDQGFRLNPEAARPGQVPMRKRQLPASFWEEP  
PTLSYPMGLEVGLAPREASLYENKKNCKGLES LGPETAPLPMSPRVLADTEPLKMSGVSLVGS LDAWSYCPFQSH  
GQPIFPGLPGVLPQGPVPSLGLWRRSLASPDVLAHFCKGVDTPGPKVYRPVVLKPIPTKPAMPPPIFNVFGYL  
PMRKRQLPASFWEEP

rs:XP\_016953626 [XP\_016953626] PREDICTED: transcriptional coactivator yorkie isoform X1 [Drosophila biarmipes].90..104

MCACLIAKIFLCSFRLYTISAFYMLTTMSASSNSNANSLIEKEIDDEDMLSPIKSNLNVVRVNQDTDDN  
LQALFDSVLNPGDAKRPLQLPLMRKLPNSFFTPPAPSHSRANSADSTYDAGSQSNISIGNKAARVIQQPDDQSP  
IAAIPTLQIQPSPQHSRLAIHHSRARSPPASLQQNFNVRARS DAAANNPNANPSSQQQPAGPTFPENSAQEFPSG  
APASSGQIDL DAMNTCMSQDIPMSMQTVHKKQRSYDVISPIQLQRQLGALPPGWEQAKTNDGQIYYLNHTTKSTQ  
WEDPRIQYRQPQQILMAERIKQNDVLQTTKQTTTSTIANMGLPLPDGWEQAVTESGDIYFINHIDRTTSWNDPRM  
QSGLSVLDCPDNLVSSLQIEDNLCSNLFNDAQAIVNPPSSHKPDDLEWYKIN PLMRKLPNSFFTPP

rs:XP\_016953627 [XP\_016953627] PREDICTED: transcriptional coactivator yorkie isoform X2 [Drosophila biarmipes].90..104

MCACLIAKIFLCSFRLYTISAFYMLTTMSASSNSNANSLIEKEIDDEDMLSPIKSNLNVVRVNQDTDDN  
LQALFDSVLNPGDAKRPLQLPLMRKLPNSFFTPPAPSHSRANSADSTYDAGSQSNISIGNKAARVIQQPDDQSP  
IAAIPTLQIQPSPQHSRLAIHHSRARSPPASLQQNFNVRARS DAAANNPNANPSSQQQPAGPTFPENSAQEFPSG  
APASSGQIDL DAMNTCMSQDIPMSMQTVHKKQRSYDVISPIQLQRQLGALPPGWEQAKTNDGQIYYLNHTTKSTQ  
WEDPRIQYRQPQQILMAERIKQNESGLSVLDCPDNLVSSLQIEDNLCSNLFNDAQAIVNPPSSHKPDDLEWYKIN  
PLMRKLPNSFFTPP

rs:XP\_017045308 [XP\_017045308] PREDICTED: transcriptional coactivator yorkie isoform X1 [Drosophila ficusphila].>tr:A0A1W4UMV6\_DROFC [A0A1W4UMV6]  
SubName: Full=transcriptional coactivator yorkie isoform X1  
{ECO:0000313|RefSeq:XP\_017045308.1}; 65..79

MLTTMSASSNTNSLIEKEIDDEDMLSPIKSNLNVVRVNQDTDDNLQALFDSVLNPGDAKRPLQVPLMR  
KLPNSFFTPPAPSHSRANSADSTYDAGSQSNISGKAVQQTGGPDGQSPIAAIPQLQIQPSAQHSRLAIHHSRARS  
SPASLQQNYNVARARS DAAANNPNANPSSQQPTAGPTFPENSAQEFPSGAPASSIDL DAMNTCMSQDMPMSMQTVH  
KKQRSYDVISPIQLQRQLGALPPGWEQAKTNDGQIYYLNHTTKSTQWEDPRIQFRQQQILMAERIKQNDVLQTT  
KQTTTSTIANNLGPLPDGWEQAVTESGDLYFINHIDRTTSWNDPRMQSGLSVLDCPDNLVSSLQIEDNLCSNLFN  
DAQAIVNPPSSHKPDDLEWYKIN PLMRKLPNSFFTPP

rs:XP\_017045309 [XP\_017045309] PREDICTED: transcriptional coactivator yorkie isoform X2 [Drosophila ficusphila].>tr:A0A1W4V1D6\_DROFC [A0A1W4V1D6]  
SubName: Full=transcriptional coactivator yorkie isoform X2  
{ECO:0000313|RefSeq:XP\_017045309.1}; 65..79

MLTTMSASSNTNSLIEKEIDDEDMLSPIKSNLNVVRVNQDTDDNLQALFDSVLNPGDAKRPLQVPLMR  
KLPNSFFTPPAPSHSRANSADSTYDAGSQSNISGKAVQQTGGPDGQSPIAAIPQLQIQPSAQHSRLAIHHSRARS  
SPASLQQNYNVARARS DAAANNPNANPSSQQPTAGPTFPENSAQEFPSGAPASSIDL DAMNTCMSQDMPMSMQTVH  
KKQRSYDVISPIQLQRQLGALPPGWEQAKTNDGQIYYLNHTTKSTQWEDPRIQFRQQQILMAERIKQNESGLSV  
LDCPDNLVSSLQIEDNLCSNLFNDAQAIVNPPSSHKPDDLEWYKIN PLMRKLPNSFFTPP

rs:XP\_017070335 [XP\_017070335] PREDICTED: transcriptional coactivator yorkie isoform X1 [Drosophila eugracilis]. 90..104

MCACLIAKIILCSFRLYTISAFYMLTTMSASSNTNTNSLIEKEIDDEDMLSPIKSNLNVVRVNQDTDDN  
LQALFDSVLNPGDAKRPLQVPLMRNLNLSFFTPPAPSHSRANSADSTYDAGSQSNISISNKAVVQQTGGPGPDG  
QSPIAAIPQLQIQPSPQHSRLAIHHSRARSPPASLQQNYNVARARS DAVNNPNANPSSQQQPAGPTFPENSAQEFPS  
GAPASSIDL DAMNTCMSQDIPMSMQTVHKKQRSYDVISPIQLQRQLGALPPGWEQAKTNDGQIYYLNHTTKSTQW  
EDPRIQYRQQQILMAERIKQSDVLQTTKQTTTSTIANMGLPLPDGWEQAVTESGDLYFINHIDRTTSWNDPRMQ  
SGLSVLDCPDNLVSSLQIEDNNLCSNLFNDAQAIVNPPSSHKPDDLEWYKIN PLMRNLNLSFFTPP

rs:XP\_017070336 [XP\_017070336] PREDICTED: transcriptional coactivator  
yorkie isoform X2 [Drosophila eugracilis]. 90..104

MCACLIAKIILCSFRLYTISAFYMLTTMSASSNTNTNSLIEKEIDDEDMLSPIKSNLNVVRVNQDTDDN  
LQALFDSVLNPGDAKRPLQVPLRMRNLNSFFTPPAPSHSRANSADSTYDAGSQSNISISNKAVVQQTGGPGPDG  
QSPIAAIPQLQIQPSPQHSRLAIHHSRARSASPASLQQNYNVRARSADAVNNPNANPSSQQPAGPTFPENSAQEFPS  
GAPASSIDLAMNTCMSQDIPMSMQTVHKKQRSYDVISPIQLQRQLGALPPGWEQAKTNDGQIYYLNHTTKSTQW  
EDPRIQYRQQQILMAERIKQSESGLSVLDCPDNLVSSLQIEDNNLCSNLFNDAQAIVNPPSSHKPDDLEWYKIN  
PLRMRNLNSFFTPP

rs:XP\_017094176 [XP\_017094176] PREDICTED: transcriptional coactivator  
yorkie isoform X1 [Drosophila bipectinata]. 65..79

MLTTMSSSNTNSLIEKEIADEDMLPPIKSPNNLVLVRVNQDTDDNLRLLFDSVLNPGDAKRPLQLPFRMR  
KLPNSFFTPPAPSHSRANSADSTYDAGSQSNISLNSISLANAAQVVDGQPAISAIPOIQPSPQQRNLAHHFR  
ARSSPASLQQNYNVRQRS DPTKPSNPPTAGPTFPENSAAEFPSSGGAGAGAVAGAGAPASSIELDGMSMVEDMPM  
STQTVHKKQRSYDVVSPQLQLLRGALPPGWEQAKTNDGQIYYLNHTTKTTQWEDPRIQFQRQQNIMAERITQN  
EVLQTPKPTTTSAIANLNDPLPDGWEQALTENGDIYFINHIARTTSWNDRMQPVPGLSVLDCPDNLVSSLQIED  
NICSNMFNDAQTIVNPPSSHKPDDLEWYKIN PFRMRKLPNSFFTPP

rs:XP\_017094177 [XP\_017094177] PREDICTED: transcriptional coactivator  
yorkie isoform X2 [Drosophila bipectinata]. 65..79

MLTTMSSSNTNSLIEKEIADEDMLPPIKSPNNLVLVRVNQDTDDNLRLLFDSVLNPGDAKRPLQLPFRMR  
KLPNSFFTPPAPSHSRANSADSTYDAGSQSNISLNSISLANAAQVVDGQPAISAIPOIQPSPQQRNLAHHFR  
ARSSPASLQQNYNVRQRS DPTKPSNPPTAGPTFPENSAAEFPSSGGAGAGAVAGAGAPASSIELDGMSMVEDMPM  
STQTVHKKQRSYDVVSPQLQLLRGALPPGWEQAKTNDGQIYYLNHTTKTTQWEDPRIQFQRQQNIMAERITQN  
EVLQTPKPTTTSAIANLNDPLPDGWEQALTENGDIYFINHIARTTSWNDRMQPVPGLSVLDCPDNLVSSPD  
PFRMRKLPNSFFTPP

rs:XP\_017094178 [XP\_017094178] PREDICTED: transcriptional coactivator  
yorkie isoform X3 [Drosophila bipectinata]. 65..79

MLTTMSSSNTNSLIEKEIADEDMLPPIKSPNNLVLVRVNQDTDDNLRLLFDSVLNPGDAKRPLQLPFRMR  
KLPNSFFTPPAPSHSRANSADSTYDAGSQSNISLNSISLANAAQVVDGQPAISAIPOIQPSPQQRNLAHHFR  
ARSSPASLQQNYNVRQRS DPTKPSNPPTAGPTFPENSAAEFPSSGGAGAGAVAGAGAPASSIELDGMSMVEDMPM  
STQTVHKKQRSYDVVSPQLQLLRGALPPGWEQAKTNDGQIYYLNHTTKTTQWEDPRIQFQRQQNIMAERITQN  
EPVPGLSVLDCPDNLVSSLQIEDNICSNMFNDAQTIVNPPSSHKPDDLEWYKIN PFRMRKLPNSFFTPP

rs:XP\_017094179 [XP\_017094179] PREDICTED: transcriptional coactivator  
yorkie isoform X4 [Drosophila bipectinata]. 65..79

MLTTMSSSNTNSLIEKEIADEDMLPPIKSPNNLVLVRVNQDTDDNLRLLFDSVLNPGDAKRPLQLPFRMR  
KLPNSFFTPPAPSHSRANSADSTYDAGSQSNISLNSISLANAAQVVDGQPAISAIPOIQPSPQQRNLAHHFR  
ARSSPASLQQNYNVRQRS DPTKPSNPPTAGPTFPENSAAEFPSSGGAGAGAVAGAGAPASSIELDGMSMVEDMPM  
STQTVHKKQRSYDVVSPQLQLLRGALPPGWEQAKTNDGQIYYLNHTTKTTQWEDPRIQFQRQQNIMAERITQN  
EPVPGLSVLDCPDNLVSSPD PFRMRKLPNSFFTPP

rs:XP\_017094180 [XP\_017094180] PREDICTED: transcriptional coactivator  
yorkie isoform X5 [Drosophila bipectinata]. 65..79

MLTTMSSSNTNSLIEKEIADEDMLPPIKSPNNLVLVRVNQDTDDNLRLLFDSVLNPGDAKRPLQLPFRMR  
KLPNSFFTPPAPSHSRANSADSTYDAGSQSNISLNSISLANAAQVVDGQPAISAIPOIQPSPQQRNLAHHFR  
ARSSPASLQQNYNVRQRS DPTKPSNPPTAGPTFPENSAAEFPSSGGAGAGAVAGAGAPASSIELDGMSMVEDMPM  
STQTVHKKQRSYDVVSPQLQLLRGALPPGWEQAKTNDGQIYYLNHTTKTTQWEDPRIQFQRQQNIMAERITQN  
DENEYRIRNG PFRMRKLPNSFFTPP

rs:XP\_017005606 [XP\_017005606] PREDICTED: transcriptional coactivator  
yorkie isoform X1 [Drosophila takahashii]. 90..104

MCACLIAKIILCSFRLYTISAFYMLTTMSASSNSNANSLIEKEIDDEDMLSPIKPNLNVVRVNQDTDDN  
LQALFDSVLNPGDAKRPLQLPLRMRKLPNSFFTPPAPSHSRANSADSTYDAGSQSNISIGSKAAQVQQPDGQSP  
IPQQLQIQPSPQHSRLAIHHSRARSASPASLQQNYNVRARSADAAVAAANNPNANPSSQQPAGPTFPENSAQEFPS  
GAPASSGQIDLAMNTCMSQDIPMSMQTVHKKQRSYDVISPIQLQRQLGALPPGWEQAKTNDGQIYYLNHTTKST  
QWEDPRIQYRQQQILMAERIKQNDVLQTTKQTTTSTIANNMGPLPDGWEQAVTESGDLYFINHIDRTTSWNDR  
MQSGLSVLDCPDNLVSSLQIEDNLCNLFNDAQAIVNPPSSHKPDDLEWYKINPLRMRKLPNSFFTPP

rs:XP\_017005607 [XP\_017005607] PREDICTED: transcriptional coactivator  
yorkie isoform X2 [Drosophila takahashii]. 90..104  
MCACLIAKIILCSFRLYTISAFYMLTTMSASSNSNANSLIEKEIDDEDMLSPIKPNLVVRVNQDQDDN  
LQALFDSVLNPGDAKRPLQLPLMRKLPNSFFTPPAPSHSRANSADSTYDAGSQSNISIGSKAAQVVQQPDGQSP  
IPQQLQIQPSPQHSRLAIHHSRARSPPASLQQNYNVRARSDAAVAAANNPNANPSSQQQPAGPTFPENSAQEFPS  
GAPASSGQIDLDAMNTCMSQDIPMSMQTVHKKQRSYDVVISPIQLQRQLGALPPGWEQAKTNDGQIYYLNHTTKST  
QWEDPRIQYRQQQILMAERIKQNESGLSVLDCPDNLVSSLQIEDNLCNLFNDAQAIVNPPSSHKPDDLEWYKI  
N PLMRKLPNSFFTPP

rs:XP\_017149868 [XP\_017149868] PREDICTED: transcriptional coactivator  
yorkie isoform X1 [Drosophila miranda]. 65..79  
MLTTMSTSNNTNIIIEKEIDDEDMLSPIKSSNNLVVRVNQDQDDNQLALFDSVLNPGDAKRPLQLPFRMR  
KLPNSFFTPPAPSHSRANSADSTYDAGSQSNINKTAQPVDVQQPAISQIQPSQQSRLAIHHFRARSSPASLQQNY  
NVRSRSDANPGPSGQGPYPENSAEFPNSAANNIELDGMNTCMGGQDMPMSTQTVHKKQRSYDVVSPIQQLQSQGLG  
ALPPGWEQAKTNDGQIYYLNHTTKSTQWEDPRIQYRQQQRLMAERIKQSDVLTQTTKQTTTSTIANSLGPLPDGW  
EQAVTESGDIYFINHIDRTTSWIDPRMQSGLPVLDCPDNLVSSLQIEDNICTNLFNDAQTIVNPPSSHKPDDLEW  
YKIN PFRMRKLPNSFFTPP

rs:XP\_017149869 [XP\_017149869] PREDICTED: transcriptional coactivator  
yorkie isoform X2 [Drosophila miranda]. 65..79  
MLTTMSTSNNTNIIIEKEIDDEDMLSPIKSSNNLVVRVNQDQDDNQLALFDSVLNPGDAKRPLQLPFRMR  
KLPNSFFTPPAPSHSRANSADSTYDAGSQSNINKTAQPVDVQQPAISQIQPSQQSRLAIHHFRARSSPASLQQNY  
NVRSRSDANPGPSGQGPYPENSAEFPNSAANNIELDGMNTCMGGQDMPMSTQTVHKKQRSYDVVSPIQQLQSQGLG  
ALPPGWEQAKTNDGQIYYLNHTTKSTQWEDPRIQYRQQQRLMAERIKQSESGLPVLDCPDNLVSSLQIEDNICT  
NLFNDAQTIVNPPSSHKPDDLEWYKIN PFRMRKLPNSFFTPP

rs:XP\_017125498 [XP\_017125498] PREDICTED: transcriptional coactivator  
yorkie isoform X1 [Drosophila elegans]. 88..102  
MCACLIAKIILCSFHLYTISAFYMLTTMSASSNTNSLIEKEIDDEDMLSPIKSNLVVRVNQDQDDNQLQ  
ALFDSVLNPGDAKRPLQLPLMRKLPNSFFTPPAPSHSRANSADSTYDAGSQSNISNKS SVVQVQQQQQPGGPDG  
QSPIAAIPQLQSPQHSRLAIHHSRARSPPASLQQNYNVRARSDAANNPNANPSSQQPTAGPTFPENSAQEFPSG  
APASSIDLDAMNTCMSQDIPMAMQTAHKKQRSYDVVSPIQQLQRQLGALPPGWEQAKTNDGQIYYLNHTTKSTQWE  
DPRIQYRQQQILMAERIKQNDVLTQTTKQTTTSTIANMGLPLPDGWEQAVTESGDLYFINHIDRTTSWNDPRMQS  
GLSVLDCPDNLVSSLQIEDNLCNLFNDAQAIVNPPSSHKPDDLEWYKIN PLMRKLPNSFFTPP

rs:XP\_017125499 [XP\_017125499] PREDICTED: transcriptional coactivator  
yorkie isoform X2 [Drosophila elegans]. 88..102  
MCACLIAKIILCSFHLYTISAFYMLTTMSASSNTNSLIEKEIDDEDMLSPIKSNLVVRVNQDQDDNQLQ  
ALFDSVLNPGDAKRPLQLPLMRKLPNSFFTPPAPSHSRANSADSTYDAGSQSNISNKS SVVQVQQQQQPGGPDG  
QSPIAAIPQLQSPQHSRLAIHHSRARSPPASLQQNYNVRARSDAANNPNANPSSQQPTAGPTFPENSAQEFPSG  
APASSIDLDAMNTCMSQDIPMAMQTAHKKQRSYDVVSPIQQLQRQLGALPPGWEQAKTNDGQIYYLNHTTKSTQWE  
DPRIQYRQQQILMAERIKQNESGLSVLDCPDNLVSSLQIEDNLCNLFNDAQAIVNPPSSHKPDDLEWYKIN  
PLMRKLPNSFFTPP

rs:XP\_008424608 [XP\_008424608] PREDICTED: protein **FAM181B** [Poecilia  
reticulata].>tr:A0A3P9PJ09\_POERE [A0A3P9PJ09] SubName: Full=Family with  
sequence similarity 181 member B {ECO:0000313|Ensembl:ENSPREP00000021871};  
246..260  
MQVVGHKQRVKFPGFPSLLLLFDVLTSSVLPPERSPSSSSVPTSSLDCLWKLHEQHQEQVFIHRTKSCF  
EETFSSGITVDATGVAAGLDRVMAVQTAIMNPQFMSFCFPDSVMEYDVEKSLDGSLLCEAENDEDFKETTRDLLS  
FIDSASSNIKLALDKPVKSKRKNVHRKYLQKQIKRGTGIITPGNTSEAPVKRQGSFVSVQQGPLQSKTLQKREGGQ  
ANLQSKSLAALFSPVKEIRGEKAKKPPMRHRNLPPSFFTEPANCSRVSSTSGMTLKDRLERGNPEAADFFELLGPD  
YSNMVNEQDIYQGVPLRGQPDGLGDPASYDHLVGGLLYTEPWTNCSGPKKPPSEGLRGTGLPQPPVYSQAEDTSS  
PLDDNGLCTLTFFPNFFPDCSISQVTYDLNGGYKNTNFSC LPMRHRNLPPSFFTEP

rs:XP\_008424630 [XP\_008424630] PREDICTED: transcriptional coactivator  
YAP1 [Poecilia reticulata].>tr:A0A3P9PJP3\_POERE [A0A3P9PJP3] SubName:  
Full=Yes-associated protein 1 {ECO:0000313|Ensembl:ENSPREP00000022087};  
45..59

MDPNQHNPAGHQIVHVRGDSQTDLELLFNFSVMNPKSSNVPPSLPMRMRNLPDSFFKPPPEPKSHSRQAS  
TDAGSGGVLTPHHVRAHSSPASLQLGAVSGGSLSGMASAGASPOHLRQSSYEIPDDVPLPAGWEMAKTTSQORYF  
LNHNDKSTTWQDPRKALLQTSQPAPPSSVPVQPQNLMPANGPLPEHWEQAITSEGEIYYINHEKRTTSWLDPRL  
EPRYALNQQRMTQSAPGKQSGQLPPSTHGGVMAGNNQLRLQOIEKERLRLQOHRPQELALRNQLPTSMQDQGSTN  
PVSSPLAQDARTMTVNSSDPFLNSGTYHSRDESTDSGLSMSSYSVPRTPDDFLNSVDEMDTGDSL PASMASQPSR  
FPDYLDGIPGTDVLDLTLEGESMVVEGEELMASLQEPLSSDILSDMESVLAATKIDKENFLTWL  
PMRMRNLPDSFFKPP

rs:XP\_008425352 [XP\_008425352] PREDICTED: transcriptional coactivator  
YAP1-like isoform X1 [Poecilia reticulata].>rs:XP\_017164245 [XP\_017164245]  
PREDICTED: transcriptional coactivator YAP1-like isoform X1 [Poecilia  
reticulata]. 46..60

MDAHRGAPPAGQOVVHVRGDSNTELEALFNAMNPGKAARQTQSVPMRMRKFPDSFFKPPPEPRGHSRQA  
SSDGGVCSSLAPHHVRAHSSPASLPINSVNAVATPIIPDDVPLPEDWEMAKTPTGQRYFINHAQRSTTWQDPRLS  
QLQSAQAQHQIACPTPSHAHSFSNPAPTTQPKNIIPETGPLPKGWQAVTAEAGEVYIDHIKQETTWDPRLPKVV  
NPAVLPLAIQQRLEKLRLKHAVLPQFAPQVQVEAGGSNQMPGGMDHRSQMLVPSVDIRIRTLNQEENLNGAHSR  
NESTDSGLSVSSLSRTSDHMLSSVDHMDIGDSSEPPSMGLQESMPVLPINEELMSGIPDSLTSMDMLMEMD TVLSG  
PHMDRDSLLTTLW PMRMRKFPDSFFKPP

rs:XP\_008425353 [XP\_008425353] PREDICTED: transcriptional coactivator  
YAP1-like isoform X2 [Poecilia reticulata]. 46..60

MDAHRGAPPAGQOVVHVRGDSNTELEALFNAMNPGKAARQTQSVPMRMRKFPDSFFKPPPEPRGHSRQA  
SSDGGVCSSLAPHHVRAHSSPASLPINSVNAVATPIIPDDVPLPEDWEMAKTPTGQRYFINHAQRSTTWQDPRLS  
QLQSAQAQHQIACPTPSHAHSFSNPAPTTQPKNIIPETAPKVNPAVLPLAIQQRLEKLRLKHAVLPQFAPQVQVEAG  
GSNQMPGGMDHRSQMLVPSVDIRIRTLNQEENLNGAHSRNESTDSGLSVSSLSRTSDHMLSSVDHMDIGDSSE  
PPSMGLQESMPVLPINEELMSGIPDSLTSMDMLMEMD TVLSGPHMDRDSLLTTLW PMRMRKFPDSFFKPP

rs:XP\_556728 [XP\_556728] AGAP006045-PA [Anopheles gambiae str.  
PEST].>tr:Q5TR76\_ANOGA [Q5TR76] SubName: Full=AGAP006045-PA  
{ECO:0000313|EMBL:EAL39988.3}; SubName: Full=Protein yorkie  
{ECO:0000313|VectorBase:AGAP006045-PA}; 72..86

MAFNGGAAGSGNGSAAAAAAAAA VA AADENESTGANKKKNLIIILVDKDSNDKLNELFDKALS NKVPL  
QIPYRMRKLPESFFMPPSSGSKSPSVSHSRENSADSAFGSGTTILGGVAGVAATGPNGLPIHHSRAHSSPASLGK  
IPVGMGGLGGGAVAAAAAAAAAAGGNGAGGGGGGGGGGGTGGTGAAGAASKSAAAQAAAAAAAAQND  
TSLGAAVLQQAALS KAAIQHLHSRGRSYDVSNLHANFNGELPPGWQAKTQDGR IYYINHNTRTTTWEDPRI TAMQ  
ESLFQQQSSVETLARISSLRRKFTAGPNNVDLGLPLEGWEEGITEKGERYYINHATRSTTWRDPRLLQEQT VRLY  
NLQLERERLRKRQOEIKSHMGDDPFLSGIADHARQESGDSGLSESSMTQSMPHTPPEFLSSIDDSMDGLSMTDNTM  
DTIAFGDNLETPDEFMLDDP LLLLEKIDAVTNLSLMDPTSSKPDNTLYDII PYRMRKLPESFFMPP

rs:XP\_020299484 [XP\_020299484] transcriptional coactivator YAP1  
[Pseudomyrmex gracilis]. 45..59

MALNQDQVDPKSLVTVDRNSESDLQALFDTVLKPDSCRPLQIPLRMRNLPNSFFNPPSTGSKSPSIS  
HSRENSADSAFGTATPSTGGGGGAPSGGTGTGGGNAAGAAGGGGGAGGGGDANSAGAVAAAAAVAVAGLTVSHP  
RAHSSPASLQQTYASAQQAPQHAPQHARHHHQKQRSYDVI STVDDLGLPLPHGWQARTPEGQIYFLNHLTRTT  
TWEDPRKTAASVAVA AVESNKSTAQQVNSLGLPLDGWEQARTAEGETYFINHQTRTTSWFDPRIPHTLQRT  
PASNTMLPQNWLQQPTGSIQSNQSLQACQKRLRLQSLHMERERLKRQREIMRQQELMMQQSTTDAAMPFLSG  
INEHARQESADSGLGLGSAYSLSHTPDDFLAIDNMDGTSEWHSVLIKRRLYRSHKYINGGAPMETPDLSTLSDN  
IDSADDLLPSLQ LSEDFNSDILDDMLRNSNSKTENVLTWL PLRMRNLPNSFFNPP

rs:XP\_017675096 [XP\_017675096] PREDICTED: LOW QUALITY PROTEIN: protein  
**FAM181B** [Lepidothrix coronata]. 166..180

MAAPAALLSPHLLSFCFPAAGGLGYADLEKGYEGGGDAGDFREATRDLLSFIDSASSNIKLALDRP  
VKSRRKVNHRKYLQKQIKRCTGIIAAAAPPASCPPAACSTRPPRREPAQAAGSSLQSKSLAALFGLQRGRGA  
AGGAEAKAGGGEKAAGGPRKVLDRNLPPSFFTEPALPAPAARGPPAKEPEKGGGAAEASEFFELLCPYEGAL  
LPEHAAPPDAFGRLPAELGLEHGLYELPLPAGPHLLGGLLYPEPPWSPAAPCSPPRKAPPEPLRPLYAGGPEP  
VPGGGGGSTEEPGGHLPAFGAPFFPECPLAPRSRPTTTALGTTARATPGCRAARFVCRDGRSPEPARGADGRW  
GSAEAVRGS AHPKPRPRPPQDPPLCTASRLLLPFGRCK PLRDRNLPPSFFTEP

rs:XP\_017685289 [XP\_017685289] PREDICTED: protein **FAM181A**-like [Lepidothrix coronata].>rs:XP\_017669370 [XP\_017669370] PREDICTED: protein **FAM181A** [Lepidothrix coronata]. 127..141

MASDSEVKTLLNFVNLAASSDIKAALDKSAPCRRSVDHRKYLQKQLKRFSQKYSRMPRCHPSKPPECGWR  
RGAEDRGHGQPPEAPDPSPHGGAAAEKVMQTAEAEESLTGERVLQEQKPEAVRPDQVPMRKRQLPASFWEEP  
QSLTARAFPASPEGLPAPRDPPEYEGKSKWSPDAASPSPDPAPHAGEKDPAGVLSGRVGAWTCCPFPCPGT  
VYQPPGALPPSPFPLGLWRKSAATLPAEVPHFCKEADGTGQKLYRPMVLKPIPTKPAIPPIFNVFGYL  
PMRKRQLPASFWEEP

rs:XP\_020373926 [XP\_020373926] protein **FAM181B** [Rhincodon typus]. 183..197

MAVQAAIMNPHFIHFCFPGSSVEYEVESAYSGALLGEMGSSGELKETTALLNFIDSASSNIKLALDKP  
VKSKRKVNHRKYLQKQIKRCTGMISGGGTSAGAGQEAGNKRQVSPASSSSSSGGSSSTGHFQCKPPPKDGSQSS  
LQSKSLAALFDSVRDLRRSAAGDRALVAAAAAGSSRKIPLRNRNLPPSFFTEPANVKITSTSGMSLKDLE  
RGNPEAAEFFELLGPDYSNMISGQEPFLGSALRIQQEGNCELASYDSYRSLGSLSGSFPHFPEPWLP  
CSAAKKSPTS GCN LAVTEGARTLPVQTPLYPNNQAANSSPMEE SPVXLASFPQFFPECSLPQVPY  
EYSPGYNCSRQNFPTL PLRNRNLPPSFFTEP

rs:XP\_020374035 [XP\_020374035] protein **FAM181A** [Rhincodon typus]. 108..122

MASADSEVKTLLNFVNLAASSDIKAALDKSAPCRRSVDHRKYLQKQLKRFSQKYSRMPRCHPGRLLDSGS  
KRAPDEQSRPCVQLRASGAADCGEPPPPLPPARHGQVPMRKRQLPASFWEEP  
RPGKSLPPPRELLLRPPPPQQP PPPPGERGVSPASVSPGPAAVAKQEPRCERGEPLRLQLASLARTV  
TLCACCPLOYHRLYQSHMALPHAASPD MGI WRKAANLPAELHAYSKDSLNGQRIHKPIVFKPIPTKPTV  
PPPLYNAYGFL PMRKRQLPASFWEEP

rs:XP\_020392912 [XP\_020392912] transcriptional coactivator YAP1 [Rhincodon typus]. 61..75

MDPSQQQQGTGTAPAAGPGAAPRAGHQIVHVRGDSETDLEALFNAVMPKNSNVPQSVPMRLRKLDP  
SFFKQPEPKNHSRQASTDGNAPPLQPQHVRHSSPASLLSAAATASAPPASGSSGSSGASFAAAVVSQGS  
GSS PASAHLRQASYEIPDDVPLPPGWEMAKTPSGQRYLNLHIEQTTTWDPRKPM SVLNSNTPAS  
PASLQQLMNTTS SGPLPDGWEQGITPDGEIYYINHKNKTT SWLDPRLDPRIYAVDQQLTQSAPVKT  
PPSIGPHSPHSPQGGAMSGSN TQQQMRLLQQLQFEKERLRLKHQELLRQEMALRSQLPSMEQD  
GSPQTPVSSPAMSQDIRTMTTNSD PFLNSGTYH SREESTDSGLGMSSYSVPRTPD DFLN  
SVEEMDTVENLGPNNIGSQNRFPDYLETIPGTVNDLGTLEEDSMNVEG EELMPSLQ  
EALSSDILNDMESVLAATKIDKESFLTWL PMRLRKL PDSFFKQP

rs:XP\_020387589 [XP\_020387589] transcriptional coactivator YAP1-like [Rhincodon typus]. 44..58

MDQNPIPPPGQTIVRVLGDSETDLEALFNAVMPKPGAVPHQVPMRMRKLPESFFKQPD  
SGSHSRQSST DSSSNLPQFQVQHIRSHSSPASLPVSANPNSQPYAHLRQOSFDNVDVPLPP  
GWEMAKTPSGQRYFLK PMRMRKLPESFFKQP

rs:XP\_018398225 [XP\_018398225] PREDICTED: LOW QUALITY PROTEIN: transcriptional coactivator YAP1 [Cyphomyrmex costatus]. 47..61

MALNQDVVEQLSKSNPVVRVDQNSESDLQALFDTVLKPD SKRPLQVPLRMRNL PDSFFNPPSTG  
SKSPS ISHSRENSADSAFGA AVPATPNNGSVPNGGTNGGSGAGGENTANAI AAAAAVAAAAGLTV  
SHPRAHSSPASLQQ TYASAQQAPQHAPQPHARHHHQQORSYDVISTVDDLGLPHGW EQARTPE  
GQIYFLNHLTRTTWEDPRKTAAA ASVA AVAAVAVESSKSNALGLPDGWEQARTAEGEIYFI  
NHQTRTTSWFDPRI PSHLQRTPASGAMLPQNWQLQQP TGIQNNQNLQACQKQIRLQSLQ  
LERERLQKQOEIMRQVGIQQEMMLRQSTTDAVMDPFLSGINEQHARQESAD SGLGLGTAY  
SMPQASDDFLNIDENMDGTSERHCALNDLTKRLYRSHKYINGGAPMDTPDLSTLSDNIDST  
D DLLP SLQLNEEFSTDILDDVQSLINPNTTKPENVL TWL PLRMRNL PDSFFNPP

rs:XP\_017449591 [XP\_017449591] PREDICTED: protein **FAM181A** isoform X1 [Rattus norvegicus].>rs:XP\_017449995 [XP\_017449995] PREDICTED: protein **FAM181A**-like isoform X1 [Rattus norvegicus]. 199..213

MQAARVLRGAGRSLTWWPQSLSPAECTKSLEHEGWYLLLPVKVCPGLSSEL PAPSRTHTLHGK  
PCTV PVM AADS DVKMLLNFVNLAASSDIKAALDKSAPCRRSVDHRKYLQKQLKRFSQKYSRL  
PRGLPGRVTEPHLQRGPEE RPGRLLPHPCPQASTGGGGSCTEKALGTPFREECLSKEQSFR  
GLNPEATRPGQVPMRKRQLPASFWEEP  
RPTLSY PMGLEVGLAPREASLYENKKNCKGLES LGPETAPLPMSPRVLTDTESLKM  
SGVSLVGS LDAWSYCPFYHQGP I F

PGLPGVLPQGPVPSVGLWRKSPASPVELAHFCKDVDTPGPKVYRPVVLKPIPTKPAMPPPIFNVFGYL  
PMRKRQLPASFWEEP

rs:XP\_008762985 [XP\_008762985] PREDICTED: protein **FAM181A** isoform X2  
[Rattus norvegicus].>rs:XP\_008763127 [XP\_008763127] PREDICTED: protein  
**FAM181A**-like isoform X2 [Rattus norvegicus]. 167..181

MVGVSQLPQGVCPLSSELPAISRTHLHGKPCVTPVVMMAADSDVKMLLNFNVLASSDIKAALDKSAPC  
RRSVDHRKYLQKQLKRFSQKYSRLPRGLPGRVTEPHLQRGPEERPGRLPLHPCPQASTGGGGSCTEKALGTPFRE  
ECLSKEQSFRGLNPEATRPGQVPMRKRQLPASFWEEPRTLSPYPMGLEVGLAPREASLYENKKNCKGLESIGPET  
APLPMSPRVLTDTESLKMGSVSLVGSLEDAWSYCPFYHQPIFPGLPGVLPQGPVPSVGLWRKSPASPVELAHFC  
KDVDTPGPKVYRPVVLKPIPTKPAMPPPIFNVFGYL PMRKRQLPASFWEEP

rs:XP\_006240571 [XP\_006240571] PREDICTED: protein **FAM181A** isoform X3  
[Rattus norvegicus].>rs:XP\_006240577 [XP\_006240577] PREDICTED: protein  
**FAM181A**-like isoform X3 [Rattus norvegicus].>rs:XP\_006240578 [XP\_006240578]  
PREDICTED: protein **FAM181A**-like isoform X3 [Rattus norvegicus]. 129..143

MAADSDVKMLLNFNVLASSDIKAALDKSAPCRRSVDHRKYLQKQLKRFSQKYSRLPRGLPGRVTEPHLQ  
RGPEERPGRLPLHPCPQASTGGGGSCTEKALGTPFREELCSKEQSFRGLNPEATRPGQVPMRKRQLPASFWEEP  
PTLSYPMGLEVGLAPREASLYENKKNCKGLESIGPETAPLPMSPRVLTDTESLKMGSVSLVGSLEDAWSYCPFYHQ  
QPIFPGLPGVLPQGPVPSVGLWRKSPASPVELAHFCKDVDTPGPKVYRPVVLKPIPTKPAMPPPIFNVFGYL  
PMRKRQLPASFWEEP

rs:XP\_006242550 [XP\_006242550] PREDICTED: transcriptional coactivator  
YAP1 isoform X1 [Rattus norvegicus]. 70..84

MEPAQQPPPQPAPQGPAPPSVSPAGTPAAPPAPPAGHQVVHVRGDSETDLEALFNAMNPKTANVPQTV  
PMRLRKLKLPDSFFKPPPEPKSHSRQASTDAGTAGALTPQHVRHSSPASLQLGAGTLTASGVVSGPAATPAAQHRLQ  
SSFEIPDDVPLPAGWEMAKTSSGQRYFLNHNDQTTTWQDPRKAMLSQLNVPTSASPAVPQTLMNSASGPLPDGWE  
QAMTQDGEVYYINHKNKTTSWLDPRLDPRFGKAMNQIRITQSAPVKQPPPLAPQSPQGGVLGGGSSNQQQIQLQQ  
LQMEKERLRLKQQLFRQVRPQAIRNINPSTANAPKCQELALRSQLPSLEQDGGTQNAVSSPGMTQELRTMTTNS  
SDPFLNSGTYHSRDESTDSGLSMSSYSIPRTPDDFLNSVDEMMDTGDITISQSTLPSQQSRFPDYLEALPGTNVDLG  
TLEGDAMNIEGEEMLPSLQEALSSEILDVESVLAATKLDKESFLTWL PMRLRKLKLPDSFFKPP

rs:XP\_006242551 [XP\_006242551] PREDICTED: transcriptional coactivator  
YAP1 isoform X2 [Rattus norvegicus]. 70..84

MEPAQQPPPQPAPQGPAPPSVSPAGTPAAPPAPPAGHQVVHVRGDSETDLEALFNAMNPKTANVPQTV  
PMRLRKLKLPDSFFKPPPEPKSHSRQASTDAGTAGALTPQHVRHSSPASLQLGAGTLTASGVVSGPAATPAAQHRLQ  
SSFEIPDDVPLPAGWEMAKTSSGQRYFLNHNDQTTTWQDPRKAMLSQLNVPTSASPAVPQTLMNSASGPLPDGWE  
QAMTQDGEVYYINHKNKTTSWLDPRLDPRFAMNQIRITQSAPVKQPPPLAPQSPQGGVLGGGSSNQQQIQLQQ  
MEKERLRLKQQLFRQVRPQAIRNINPSTANAPKCQELALRSQLPSLEQDGGTQNAVSSPGMTQELRTMTTNS  
PFLNSGTYHSRDESTDSGLSMSSYSIPRTPDDFLNSVDEMMDTGDITISQSTLPSQQSRFPDYLEALPGTNVDLGLT  
EGDAMNIEGEEMLPSLQEALSSEILDVESVLAATKLDKESFLTWL PMRLRKLKLPDSFFKPP

rs:XP\_006242552 [XP\_006242552] PREDICTED: transcriptional coactivator  
YAP1 isoform X3 [Rattus norvegicus]. 70..84

MEPAQQPPPQPAPQGPAPPSVSPAGTPAAPPAPPAGHQVVHVRGDSETDLEALFNAMNPKTANVPQTV  
PMRLRKLKLPDSFFKPPPEPKSHSRQASTDAGTAGALTPQHVRHSSPASLQLGAGTLTASGVVSGPAATPAAQHRLQ  
SSFEIPDDVPLPAGWEMAKTSSGQRYFLNHNDQTTTWQDPRKAMLSQLNVPTSASPAVPQTLMNSASGPLPDGWE  
QAMTQDGEVYYINHKNKTTSWLDPRLDPRFGKAMNQIRITQSAPVKQPPPLAPQSPQGGVLGGGSSNQQQIQLQQ  
LQMEKERLRLKQQLFRQVRPQAIRNINPSTANAPKCQELALRSQLPSLEQDGGTQNAVSSPGMTQELRTMTTNS  
SDPFLNSGTYHSRDESTDSGLSMSSYSIPRTPDDFLNSVDEMMDTGDITISQSTLPSQQSRFPDYLEALPGTNVDLGLT  
EGDAMNIEGEEMLPSLQEALSSEILDVESVLAATKLDKESFLTWL PMRLRKLKLPDSFFKPP

rs:XP\_006242553 [XP\_006242553] PREDICTED: transcriptional coactivator  
YAP1 isoform X4 [Rattus norvegicus]. 70..84

MEPAQQPPPQPAPQGPAPPSVSPAGTPAAPPAPPAGHQVVHVRGDSETDLEALFNAMNPKTANVPQTV  
PMRLRKLKLPDSFFKPPPEPKSHSRQASTDAGTAGALTPQHVRHSSPASLQLGAGTLTASGVVSGPAATPAAQHRLQ  
SSFEIPDDVPLPAGWEMAKTSSGQRYFLNHNDQTTTWQDPRKAMLSQLNVPTSASPAVPQTLMNSASGPLPDGWE  
QAMTQDGEVYYINHKNKTTSWLDPRLDPRFAMNQIRITQSAPVKQPPPLAPQSPQGGVLGGGSSNQQQIQLQQ  
MEKERLRLKQQLFRQVRPQAIRNINPSTANAPKCQELALRSQLPSLEQDGGTQNAVSSPGMTQELRTMTTNS  
SDPFLNSGTYHSRDESTDSGLSMSSYSIPRTPDDFLNSVDEMMDTGDITISQSTLPSQQSRFPDYLEALPGTNVDLGLT  
EGDAMNIEGEEMLPSLQEALSSEILDVESVLAATKLDKESFLTWL PMRLRKLKLPDSFFKPP

SGTYHSRDESTDSGLSMSSYSIPRTPDDFLNSVDEMDTGDTISQSTLPSQQSRFPDYLEALPGTNVDLGTLEGDAMNIEGEEELMPSLQEQALSSEILDVESVLAATKLDKESFRTLWL PMRLRKLPSDFFKPP

rs:XP\_008764115 [XP\_008764115] PREDICTED: transcriptional coactivator YAP1 isoform X5 [Rattus norvegicus]. 70..84

MEPAQQPPPQPAPQGPAPPSVSPAGTPAAPPAPPAGHQVVHVRGDSETDLEALFNAVMPKNTANVPQTV PMRLRKLPSDFFKPPEPKSHSRQASTDAGTAGALTPQHVAHSSPASLQLGAGTLTASGVVSGPAATPAAQHRLRQ SSFEIPDDVPLPAGWEMAKTSSGQRYFLNHNDQTTTWQDPRKAMLSQLNVPTSASPAVPQTLMNSASGPLPDGWE QAMTQDGEVYYINHKNKTTSWLDPRLDPRFAMNQRITQSAPVKQPPPLAPQSPQGGVLLGGSSNQQQQIQLLQ LQMEKERLRLKQQLFRQVRPQELALRSQLPSLEQDGGTQNAVSSPGMTQELRTMTTNSSDPFLNSGTYHSRDES TDSGLSMSSYSIPRTPDDFLNSVDEMDTGDTISQSTLPSQQSRFPDYLEALPGTNVDLGTLEGDAMNIEGEEELMPSLQEQALSSEILDVESVLAATKLDKESFRTLWL PMRLRKLPSDFFKPP

rs:XP\_008764116 [XP\_008764116] PREDICTED: transcriptional coactivator YAP1 isoform X6 [Rattus norvegicus]. 70..84

MEPAQQPPPQPAPQGPAPPSVSPAGTPAAPPAPPAGHQVVHVRGDSETDLEALFNAVMPKNTANVPQTV PMRLRKLPSDFFKPPEPKSHSRQASTDAGTAGALTPQHVAHSSPASLQLGAGTLTASGVVSGPAATPAAQHRLRQ SSFEIPDDVPLPAGWEMAKTSSGQRYFLNHNDQTTTWQDPRKAMLSQLNVPTSASPAVPQTLMNSASGPLPDGWE QAMTQDGEVYYINHKNKTTSWLDPRLDPRFAMNQRITQSAPVKQPPPLAPQSPQGGVLLGGSSNQQQQIQLLQ LQMEKERLRLKQQLFRQVRPQELALRSQLPSLEQDGGTQNAVSSPGMTQELRTMTTNSSDPFLNSGTYHSRDESTDSGLSMSSYSIPRTPDDFLNSVDEMDTGDTISQSTLPSQQSRFPDYLEALPGTNVDLGTLEGDAMNIEGEEELMPSLQEQALSSEILDVESVLAATKLDKESFRTLWL PMRLRKLPSDFFKPP

rs:XP\_006242554 [XP\_006242554] PREDICTED: transcriptional coactivator YAP1 isoform X7 [Rattus norvegicus]. 70..84

MEPAQQPPPQPAPQGPAPPSVSPAGTPAAPPAPPAGHQVVHVRGDSETDLEALFNAVMPKNTANVPQTV PMRLRKLPSDFFKPPEPKSHSRQASTDAGTAGALTPQHVAHSSPASLQLGAGTLTASGVVSGPAATPAAQHRLRQ SSFEIPDDVPLPAGWEMAKTSSGQRYFLNHNDQTTTWQDPRKAMLSQLNVPTSASPAVPQTLMNSASGPLPDGWE QAMTQDGEVYYINHKNKTTSWLDPRLDPRFAMNQRITQSAPVKQPPPLAPQSPQGGVLLGGSSNQQQQIQLLQ LQMEKERLRLKQQLFRQVRPQELALRSQLPSLEQDGGTQNAVSSPGMTQELRTMTTNSSDPFLNSGTYHSRDESTDSGLSMSSYSIPRTPDDFLNSVDEMDTGDTISQSTLPSQQSRFPDYLEALPGTNVDLGTLEGDAMNIEGEEELMPSLQEQALSSEILDVESVLAATKLDKESFRTLWL PMRLRKLPSDFFKPP

rs:XP\_021062252 [XP\_021062252] protein **FAM181B** [Mus pahari]. 218..232

MAVQAALLSSHPFIPFGFGGSADGLVSAFGSLDKGCCFEDDESGASAGALLSGSEGGDVREATRDLLESF IDSASSNIKLALDKPGKSKRKNHRKYLQKQIKRCSGLMGSAPPRPASPSAADAPAKRPTGAPGAPTVAHPAHCK AAPREATQAAAAASLQSRSLAALFDSLRIHGGAEATAGGAEAVSASSLGAASAAGDGAGIAVSSVAPGTRKVPL RARNLPPSFFTEPSRVGCGGASGGPSGQGVSLGDLEKGAEEVEFFELLAPDFGSGNDSSVLMADPLDPFPAGAT VLRGPLELESQPFQAMVGNLLYPEPWNTPSCPQTKKPLAGVRGGVTLNEPVRLLYPTALDSPGGEDAPALAS FTPFFPDCALPPPHQVSYDYSAGYSRAVYPSLWRPDGLWEGASGEEGGHPD PLRARNLPPSFFTEP

rs:XP\_021062508 [XP\_021062508] transcriptional coactivator YAP1 isoform X1 [Mus pahari]. 70..84

MEPAQQPPPQPAPQGPAPPSVSPAGTPAAPPAPPAGHQVVHVRGDSETDLEALFNAVMPKNTANVPQTV PMRLRKLPSDFFKPPEPKSHSRQASTDAGTAGALTPQHVAHSSPASLQLGAVSPGTLTASGVVSGPAATPAAQH LRQSSFEIPDDVPLPAGWEMAKTSSGQRYFLNHNDQTTTWQDPRKAMLSQLNVPAPASPAVPQTLMNSASGPLPD GWEQAMTQDGEVYYINHKNKTTSWLDPRLDPRFAMNQRITQSAPVKQPPPLAPQSPQGGVLLGGSSNQQQQIQLLQ LQMEKERLRLKQQLFRQAIRNINPSTANAPKCQELALRSQLPALEQDGGTQNAVSSPGMSQELRTMTTNSSDP FLNSGTYHSRDESTDSGLSMSSYSIPRTPDDFLNSVDEMDTGDTISQSTLPSQQSRFPDYLEALPGTNVDLGTLE GDAMNIEGEEELMPSLQEQALSSEILDVESVLAATKLDKESFRTLWL PMRLRKLPSDFFKPP

rs:XP\_021062509 [XP\_021062509] transcriptional coactivator YAP1 isoform X2 [Mus pahari]. 70..84

MEPAQQPPPQPAPQGPAPPSVSPAGTPAAPPAPPAGHQVVHVRGDSETDLEALFNAVMPKNTANVPQTV PMRLRKLPSDFFKPPEPKSHSRQASTDAGTAGALTPQHVAHSSPASLQLGAVSPGTLTASGVVSGPAATPAAQH LRQSSFEIPDDVPLPAGWEMAKTSSGQRYFLNHNDQTTTWQDPRKAMLSQLNVPAPASPAVPQTLMNSASGPLPD GWEQAMTQDGEVYYINHKNKTTSWLDPRLDPRFAMNQRITQSAPVKQPPPLAPQSPQGGVLLGGSSNQQQQIQLLQ LQMEKERLRLKQQLFRQVRPQELALRSQLPALEQDGGTQNAVSSPGMSQELRTMTTNSSDPFLNSGTYHSRDES



STDSGLSMSSYSIPRTPDDFLNSVDEMDTGDGTISQSTLPSQQSRFPDYLEALPGTNVDLGTLEGDAMNIEGEELM  
PSLQEALSSEILDVESVLAATKLDKESFLTWL PMRLRKL PDSFFKPP

rs:XP\_021062510 [XP\_021062510] transcriptional coactivator YAP1 isoform  
X3 [Mus pahari]. 70..84

MEPAQQPPPQPAPQGPAPPSVSPAGTPAAPPAPPAGHQVVHVRGDSETDLEALFNAV MNPKTANVPQTV  
PMRLRKL PDSFFKPPPEPKSHSRQASTDAGTAGALTPQH VRAHSSPASLQLGAVSPGTLTASGVVSGPAATPAAQH  
LRQSSFEIPDDVPLPAGWEMAKTSSGQRYFLNHNDQTTTWQDPRKAMLSQLNVPAPASPAVPQTLMNSASGPLPD  
GWEQAMTQDGEVYYINHKNKTTSWLDPRLDPRFAMNQRITQSAPVKQPPPLAPQSPQGGVLGGGSSNQQQQIQLQ  
QLQMEKERLRLKQOELFRQELALRSQLPALEQDGGTQNAVSSPGMSQELRTMTTNSSDPFLNSGTYHSRDESTDS  
GLSMSSYSIPRTPDDFLNSVDEMDTGDGTISQSTLPSQQSRFPDYLEALPGTNVDLGTLEGDAMNIEGEELMPSLQ  
EALSSEILDVESVLAATKLDKESFLTWL PMRLRKL PDSFFKPP

rs:XP\_021062511 [XP\_021062511] transcriptional coactivator YAP1 isoform  
X4 [Mus pahari]. 70..84

MEPAQQPPPQPAPQGPAPPSVSPAGTPAAPPAPPAGHQVVHVRGDSETDLEALFNAV MNPKTANVPQTV  
PMRLRKL PDSFFKPPPEPKSHSRQASTDAGTAGALTPQH VRAHSSPASLQLGAVSPGTLTASGVVSGPAATPAAQH  
LRQSSFEIPDDVPLPAGWEMAKTSSGQRYFLNHNDQTTTWQDPRKAMLSQLNVPAPASPAVPQTLMNSASAMNQR  
ITQSAPVKQPPPLAPQSPQGGVLGGGSSNQQQQIQLQQLQMEKERLRLKQOELFRQVRPQAIRNINPSTANAPKC  
QELALRSQLPALEQDGGTQNAVSSPGMSQELRTMTTNSSDPFLNSGTYHSRDESTDSGLSMSSYSIPRTPDDFLN  
SVDEMDTGDGTISQSTLPSQQSRFPDYLEALPGTNVDLGTLEGDAMNIEGEELMPSLQEALSSEILDVESVLAATK  
LDKESFLTWL PMRLRKL PDSFFKPP

rs:XP\_021062512 [XP\_021062512] transcriptional coactivator YAP1 isoform  
X5 [Mus pahari]. 70..84

MEPAQQPPPQPAPQGPAPPSVSPAGTPAAPPAPPAGHQVVHVRGDSETDLEALFNAV MNPKTANVPQTV  
PMRLRKL PDSFFKPPPEPKSHSRQASTDAGTAGALTPQH VRAHSSPASLQLGAVSPGTLTASGVVSGPAATPAAQH  
LRQSSFEIPDDVPLPAGWEMAKTSSGQRYFLNHNDQTTTWQDPRKAMLSQLNVPAPASPAVPQTLMNSASAMNQR  
ITQSAPVKQPPPLAPQSPQGGVLGGGSSNQQQQIQLQQLQMEKERLRLKQOELFRQAIRNINPSTANAPKCQELA  
LRSQLPALEQDGGTQNAVSSPGMSQELRTMTTNSSDPFLNSGTYHSRDESTDSGLSMSSYSIPRTPDDFLNSVDE  
MDTGDGTISQSTLPSQQSRFPDYLEALPGTNVDLGTLEGDAMNIEGEELMPSLQEALSSEILDVESVLAATKLDKE  
SFLTWL PMRLRKL PDSFFKPP

rs:XP\_021062513 [XP\_021062513] transcriptional coactivator YAP1 isoform  
X6 [Mus pahari]. 70..84

MEPAQQPPPQPAPQGPAPPSVSPAGTPAAPPAPPAGHQVVHVRGDSETDLEALFNAV MNPKTANVPQTV  
PMRLRKL PDSFFKPPPEPKSHSRQASTDAGTAGALTPQH VRAHSSPASLQLGAVSPGTLTASGVVSGPAATPAAQH  
LRQSSFEIPDDVPLPAGWEMAKTSSGQRYFLNHNDQTTTWQDPRKAMLSQLNVPAPASPAVPQTLMNSASAMNQR  
ITQSAPVKQPPPLAPQSPQGGVLGGGSSNQQQQIQLQQLQMEKERLRLKQOELFRQVRPQELALRSQLPALEQD  
GTQNAVSSPGMSQELRTMTTNSSDPFLNSGTYHSRDESTDSGLSMSSYSIPRTPDDFLNSVDEMDTGDGTISQSTL  
PSQQSRFPDYLEALPGTNVDLGTLEGDAMNIEGEELMPSLQEALSSEILDVESVLAATKLDKESFLTWL  
PMRLRKL PDSFFKPP

rs:XP\_021062514 [XP\_021062514] transcriptional coactivator YAP1 isoform  
X7 [Mus pahari]. 70..84

MEPAQQPPPQPAPQGPAPPSVSPAGTPAAPPAPPAGHQVVHVRGDSETDLEALFNAV MNPKTANVPQTV  
PMRLRKL PDSFFKPPPEPKSHSRQASTDAGTAGALTPQH VRAHSSPASLQLGAVSPGTLTASGVVSGPAATPAAQH  
LRQSSFEIPDDVPLPAGWEMAKTSSGQRYFLNHNDQTTTWQDPRKAMLSQLNVPAPASPAVPQTLMNSASAMNQR  
ITQSAPVKQPPPLAPQSPQGGVLGGGSSNQQQQIQLQQLQMEKERLRLKQOELFRQELALRSQLPALEQDGGTQ  
NAVSSPGMSQELRTMTTNSSDPFLNSGTYHSRDESTDSGLSMSSYSIPRTPDDFLNSVDEMDTGDGTISQSTLPSQ  
SRFPDYLEALPGTNVDLGTLEGDAMNIEGEELMPSLQEALSSEILDVESVLAATKLDKESFLTWL  
PMRLRKL PDSFFKPP

rs:XP\_021062515 [XP\_021062515] transcriptional coactivator YAP1 isoform  
X8 [Mus pahari]. 70..84

MEPAQQPPPQPAPQGPAPPSVSPAGTPAAPPAPPAGHQVVHVRGDSETDLEALFNAV MNPKTANVPQTV  
PMRLRKL PDSFFKPPPEPKSHSRQASTDAGTAGALTPQH VRAHSSPASLQLGAVSPGTLTASGVVSGPAATPAAQH  
LRQSSFEIPDDVPLPAGWEMAKTSSGQRYFLNHNDQTTTWQDPRKAMLSQLNVPAPASPAVPQTLMNSASGPLPD  
GWEQAMTQDGEVYYINHKNKTTSWLDPRLDPRFAMNQRITQSAPVKQPPPLAPQSPQGGVLGGGSSNQQQQIQLQ

QLQMEKERLRLKQQELFRQVRPQAIRNINPSTANAPKCQELALRSQLPALQDGGTQNAVSSPGMSQELRTMTTN  
SSDPFLNSGTYHSRDESTDSGLSMSSYSIPRTPDDFLNSVDEMDTGDITISQSTLPSQQSRFPDYLEALPGTNVDL  
GTLEGDAMNIEGELMPSLQEALSSEILDVESVLAATKLDKESFLTWL PMRLRKLPSDFFKPP

rs:XP\_017460851 [XP\_017460851] PREDICTED: transcriptional coactivator  
yorkie [Rhagoletis zephyria]. 76..90

MHNTERRIITSGYFGNMSLSKTVGGLNKGNAKEKERSTGKESNNLVVVRIDQSDNNLQALFDSVLNPGES  
KRPLQVPPFRMRQLPESFFKPPATTSRSPSVAHSRANSADSAYDTGSQPNVSQGNISTSSIAAVPATITQPQVAAN  
RLAISHSRAHSSPASLQQTYNVHIGNVMEAGACLQDQIGPVYTSNAVQFPFPGVNAGSGVRMDQVDQSVTKDGSNA  
IQTFHMKQRSYDQVSTIQQLQNELGPLPPGWQAKTNDGQIYYLNHTTKTTQWEDPRIQLKQQLFQEGPLPHSVNLK  
NKESVNLAENLGLPEGWEQAYTESGDVYFINHVNRITTSWNPRIQDFLQKPVKSQKPGPSWLNIIQQIDKEQDYF  
KQSSEQSSLTRQNGSLQMDPFLSGDNHARQESSDSGLSLSSNTFSATTDLMPNIDDSMDCISESGSLNALSGIDC  
PDNLVSSLQLEDNICNEMFSDVHSMNLASATKPDITLDWYKIN PFRMRQLPESFFKPP

rs:XP\_021058188 [XP\_021058188] protein **FAM181A** [Mus pahari]. 129..143

MAADSDVKMLLNFNVLASSDIKAALDKSAPCRRSVDHRKYLQKQLKRFSQKYSRLPRGLPGRVAEPhLQ  
RGPEERPGRPPLHPCPQSSPGGGGSCTEKALGTPFREECLSKDQGFRLNPEAARPGQVPMRKRQLPASFWEEP  
PTLSYPVGLVGLAPRETSLYENKKNCKGLES LGPETAPLPMSPRVLADTEPLKMSGVSLVGLDAWSYCPFQSH  
GQPIFPGLPGVLPQGPVPSLGLWRSLASPVDLAHFCKGVDTPGPKVYRPVVLKPIPTKPAMPPPIFNVFGYL  
PMRKRQLPASFWEEP

rs:XP\_021035100 [XP\_021035100] protein **FAM181A** [Mus caroli]. 129..143

MAADSDVKMLLNFNVLASSDIKAALDKSAPCRRSVDHRKYLQKQLKRFSQKYSRLPRGLPGRVAEPhLQ  
RGPEERPGRPPLHPCPQSSPGGGGSCTEKALGTPFREECLSKDQGFRLNPEAARPGQVPMRKRQLPASFWEEP  
PTLSYPMGLEVGLAPREASLYENKKNCKGLES LGPETAPLPMSPRVLADTEPLKMSGVSLVGNLDAWSYCPFQSH  
GQPIFPGLPGVLPQGPVPSLGLWRSLASPVDLAHFCKGVDTPGPKVYRPVVLKPIPTKPAMPPPIFNVFGYL  
PMRKRQLPASFWEEP

rs:XP\_017532274 [XP\_017532274] PREDICTED: protein **FAM181A** isoform X1  
[Manis javanica]. 198..212

MLCIWRGAPDWPEGPPSSGDSSSIQPTRGLHNCFQPDTRSSRPRGPGPAASHQKPPSSWKAQC SGPLV  
MASDSVKMLLNFNVLASSDIKAALDKSAPCRRSVDHRKYLQKQLKRFSQKYSRLPRGLPGRGAEPHLKRGPEDQ  
PGRLPLNSGHDSPPSVGGGCKEKS LGNYPYREECLSKDQALQGNPEAARPGQVPMRKRQLPASFWEEP  
VGLVGLVGPREGPPYEGKKHCKGLEPLGPEMATAHTSPRVPAEKEPLKMPGVSLVGRVNAWSCCPFYHGQPIYP  
GPPGALPQSLVPSLGLWRKSPASPGELAHFCKDQVDTGLGQKQVYRPVVLKPIPTKPAMPPPIFNIFGYL  
PMRKRQLPASFWEEP

rs:XP\_017532275 [XP\_017532275] PREDICTED: protein **FAM181A** isoform X2  
[Manis javanica].>rs:XP\_017532276 [XP\_017532276] PREDICTED: protein **FAM181A**  
isoform X2 [Manis javanica].>rs:XP\_017532277 [XP\_017532277] PREDICTED:  
protein **FAM181A** isoform X2 [Manis javanica]. 129..143

MASDSVKMLLNFNVLASSDIKAALDKSAPCRRSVDHRKYLQKQLKRFSQKYSRLPRGLPGRGAEPHLK  
RGPEDQPGRLPLNSGHDSPPSVGGGCKEKS LGNYPYREECLSKDQALQGNPEAARPGQVPMRKRQLPASFWEEP  
PHTSYVGLVGLVGPREGPPYEGKKHCKGLEPLGPEMATAHTSPRVPAEKEPLKMPGVSLVGRVNAWSCCPFYHGQPIYP  
GPPGALPQSLVPSLGLWRKSPASPGELAHFCKDQVDTGLGQKQVYRPVVLKPIPTKPAMPPPIFNIFGYL  
PMRKRQLPASFWEEP

rs:XP\_017664169 [XP\_017664169] PREDICTED: sentrin-specific protease 3  
[Lepidothrix coronata]. 169..183

MAGRQROGVIQPLAELRLPSFFPHSLLLPHTPEPNFHNLS EEEEEEEEEEEEEVEAAEENVRPEPAISS  
TAETTLRLKFKSELISCDIQRYFGRRGREEATGTQVPKDCESPRSTGAQPEAPRGSPGAAHRLGLAELFEYGV  
HRCLSPRAAGSRTQRLERKYGHITPMHRRKLPPSFWKEPGPASLLHTGTPDFSDLLANWTVEPGPELPCAGREL  
LEPGRPGLEAEFPGL PMHRRKLPPSFWKEP

rs:XP\_017671536 [XP\_017671536] PREDICTED: transcriptional coactivator  
YAP1 isoform X1 [Lepidothrix coronata]. 86..100

MDPGQPQPPQPPQAAQPPAPQPPQPPQPPGAVSGASAGAAQPPGAGPPPAGHQIVHVRGDSETDLEAL  
FNAVMPKGANVPHTLPMRLRKLPSDFFKPPPEPKAHSRQASTDAGTAGALTPQHVRHSSPASLQLGAVSPGTLT  
PSGVVTGPGAPSSQHLRQSSFEIPDDVPLPPGWEMAKTPSGQRYFLNHIDQTTTWDPRKAMLSQMNVTAPTSPS

VQQNIMNSASAMNQRISQSAPVKQPPPLAPQSPQGGVMGGSSSNQQQQMRLQQLQMEKERLRLKHQELLRQELAL  
RSQLPTMEQDGGSQNPVSSPGMSQELRTMTTNSDDPFLNSGTYHSRDESTDSGLSMSSYSVPRTPDDFLNSVDEM  
DTGDSIGQSNIPSHQNRFPDYLEAIPGTNVDLGTLEGDGMNIEGEEELMPSLQEQALSSDILNDMESVLAATKLDKE  
SFLTWL PMRLRKLKLPDSFFKPP

rs:XP\_017671537 [XP\_017671537] PREDICTED: transcriptional coactivator  
YAP1 isoform X2 [Lepidothrix coronata]. 13..27

MNPKGANVPHTLPMRLRKLKLPDSFFKPPPEPKAHSRQASTDAGTAGALTPQHVRHSSPASLQLGAVSPGT  
LTPSGVVTGPGAPSSQHLRQSSFEIPDDVPLPPGWEMAKTPSGQRYFLNHIDQTTTWQDPRKAMLSQMNVTAPTS  
PSVQQNIMNSASGPLPDGWEQAMTQDGEIYYINHKNTTSWLDPRLDPRFAMNQRISQSAPVKQPPPLAPQSPQG  
GVMGGSSSNQQQQMRLQQLQMEKERLRLKHQELLRQVRPQALRNINPSTANSPKHQELALRSQELPTMEQDGGSQN  
PVSSPGMSQELRTMTTNSDDPFLNSGTYHSRDESTDSGLSMSSYSVPRTPDDFLNSVDEMDTGDSIGQSNIPSHQ  
NRFPDYLEAIPGTNVDLGTLEGDGMNIEGEEELMPSLQEQALSSDILNDMESVLAATKLDKESFLTWL  
PMRLRKLKLPDSFFKPP

rs:XP\_017671539 [XP\_017671539] PREDICTED: transcriptional coactivator  
YAP1 isoform X4 [Lepidothrix coronata].>tr:A0A218VAG6\_9PASE [A0A218VAG6]  
SubName: Full=Transcriptional coactivator YAP1  
{ECO:0000313|EMBL:OWK62926.1}; 13..27

MNPKGANVPHTLPMRLRKLKLPDSFFKPPPEPKAHSRQASTDAGTAGALTPQHVRHSSPASLQLGAVSPGT  
LTPSGVVTGPGAPSSQHLRQSSFEIPDDVPLPPGWEMAKTPSGQRYFLNHIDQTTTWQDPRKAMLSQMNVTAPTS  
PSVQQNIMNSASGPLPDGWEQAMTQDGEIYYINHKNTTSWLDPRLDPRFAMNQRISQSAPVKQPPPLAPQSPQG  
GVMGGSSSNQQQQMRLQQLQMEKERLRLKHQELLRQVRPQELALRSQELPTMEQDGGSQNPVSSPGMSQELRTMTT  
NSDDPFLNSGTYHSRDESTDSGLSMSSYSVPRTPDDFLNSVDEMDTGDSIGQSNIPSHQNRFPDYLEAIPGTNVD  
LGTLEGDGMNIEGEEELMPSLQEQALSSDILNDMESVLAATKLDKESFLTWL PMRLRKLKLPDSFFKPP

rs:XP\_015481337 [XP\_015481337] PREDICTED: LOW QUALITY PROTEIN: protein  
**FAM181B** [Parus major]. 171..185

MAVPAALLSPHLLSFCFPAAGGLLGYADLEKGYEGGGDAGDFREATRDLLSFIDSASSNIKLALDRP  
VKSRRKVNHRKYLQKQIKRCTGIIAAAPPPAACPPSACPARPPRREPAQAAGSSLQSKSLAALFGLQRGRGA  
AGGAEAKAGGGGAGGGEKAAGGPRKVPLRDRNLPPSFFTEPALPGPAARGPPAKEPEKGGGAEATEFFELLCE  
YGALLPEHAAPTDAFGRLPAELGLEHGLYELPLPAGPHLLGGLLYPEPPWSPAAPCSPPRKAPAEPLRPLYPG  
GPEPVPGGGGGEEPPGGHLPAGFAPFFPECSLPPRSRPTTTAAGTTAGATPGCRAAGDRGPPGRRGERSPRGGGR  
TDGRTLQGRGGRTELRTPHCM PLRDRNLPPSFFTEP

rs:XP\_015494803 [XP\_015494803] PREDICTED: transcriptional coactivator  
YAP1 isoform X1 [Parus major]. 85..99

MDPGQPQTQQPPQAAQPPASQQQPPPQPPGAVS GAPAGAAQPPGAGPPPAGHQIVHVRGDSETDLEALF  
NAVMPKGANVPHTLPMRLRKLKLPDSFFKPPPEPKAHSRQASTDAGTAGALTPQHVRHSSPASLQLGAVSPGTLTP  
SGVVTGPGAPSSQHLRQSSFEIPDDVPLPPGWEMAKTPSGQRYFLNHIDQTTTWQDPRKAMLSQMNVTAPTS  
QSNIMNSASGPLPDGWEQAMTQDGEIYYINHKNTTSWLDPRLDPRFAMNQRISQSAPVKQPPPLAPQSPQGGVM  
GGSSSNQQQQMRLQQLQMEKERLRLKHQELLRQVRPQALRNINPSTANSPKHQELALRSQELPTMEQDGGSQNPVS  
SPGMSQELRTMTTNSDDPFLNSGTYHSRDESTDSGLSMSSYSVPRTPDDFLNSVDEMDTGDSIGQSNIPSHQNR  
FPDYLEAIPGTNVDLGTLEGDGMNIEGEEELMPSLQEQALSSDILNDMESVLAATKLDKESFLTWL  
PMRLRKLKLPDSFFKPP

rs:XP\_015494813 [XP\_015494813] PREDICTED: transcriptional coactivator  
YAP1 isoform X2 [Parus major]. 85..99

MDPGQPQTQQPPQAAQPPASQQQPPPQPPGAVS GAPAGAAQPPGAGPPPAGHQIVHVRGDSETDLEALF  
NAVMPKGANVPHTLPMRLRKLKLPDSFFKPPPEPKAHSRQASTDAGTAGALTPQHVRHSSPASLQLGAVSPGTLTP  
SGVVTGPGAPSSQHLRQSSFEIPDDVPLPPGWEMAKTPSGQRYFLNHIDQTTTWQDPRKAMLSQMNVTAPTS  
QSNIMNSASGPLPDGWEQAMTQDGEIYYINHKNTTSWLDPRLDPRFAMNQRISQSAPVKQPPPLAPQSPQGGVM  
GGSSSNQQQQMRLQQLQMEKERLRLKHQELLRQALRNINPSTANSPKHQELALRSQELPTMEQDGGSQNPVSSPGM  
SQELRTMTTNSDDPFLNSGTYHSRDESTDSGLSMSSYSVPRTPDDFLNSVDEMDTGDSIGQSNIPSHQNRFPDY  
LEAIPGTNVDLGTLEGDGMNIEGEEELMPSLQEQALSSDILNDMESVLAATKLDKESFLTWL  
PMRLRKLKLPDSFFKPP

rs:XP\_015494821 [XP\_015494821] PREDICTED: transcriptional coactivator  
YAP1 isoform X3 [Parus major]. 85..99

MDPGQPQTQQPPQAAQPPASQQQPPPQPPGAVSGAPAGAAQPPGAGPPPAGHQIVHVRGDSETDLEALF  
NAVMNPKGANVPHTLPMRLRKLKLPDSFFKPPEPKAHSRQASTDAGTAGALTPQHVRHSSPASLQLGAVSPGTLTP  
SGVVTGPGAPSSQHLRQSSFEIPDDVPLPPGWEMAKTPSGQRYFLNHIDQTTTWQDPRKAMLSQMNVTAPTSPSV  
QQNIMNSASGPLPDGWEQAMTQDGEIYYINHKNKTTSWLDPRLDPRFAMNQRIQSAPVKQPPPLAPQSPQGGVM  
GGSSSNQQQQMRLQQLQMEKERLRLKHQELLRQVRPQELALRSQLPTMEQDGGSQNPVSSPGMSQELRTMTTNS  
DPFLNSGTYHSRDESTDSGLSMSSYSVPRTPDFFLNSVDEMDTGDSIGQSNIPSHQNRFPDYLEAIPGTNVDLGT  
LEGDGMNIEGEEMLPSLQEQALSSDILNDMESVLAATKLDKESFLTWL PMRLRKLKLPDSFFKPP

rs:XP\_015494831 [XP\_015494831] PREDICTED: transcriptional coactivator  
YAP1 isoform X4 [Parus major]. 85..99

MDPGQPQTQQPPQAAQPPASQQQPPPQPPGAVSGAPAGAAQPPGAGPPPAGHQIVHVRGDSETDLEALF  
NAVMNPKGANVPHTLPMRLRKLKLPDSFFKPPEPKAHSRQASTDAGTAGALTPQHVRHSSPASLQLGAVSPGTLTP  
SGVVTGPGAPSSQHLRQSSFEIPDDVPLPPGWEMAKTPSGQRYFLNHIDQTTTWQDPRKAMLSQMNVTAPTSPSV  
QQNIMNSASGPLPDGWEQAMTQDGEIYYINHKNKTTSWLDPRLDPRFAMNQRIQSAPVKQPPPLAPQSPQGGVM  
GGSSSNQQQQMRLQQLQMEKERLRLKHQELLRQELALRSQLPTMEQDGGSQNPVSSPGMSQELRTMTTNSDPFL  
NSGTYHSRDESTDSGLSMSSYSVPRTPDFFLNSVDEMDTGDSIGQSNIPSHQNRFPDYLEAIPGTNVDLGTLEGD  
GMNIEGEEMLPSLQEQALSSDILNDMESVLAATKLDKESFLTWL PMRLRKLKLPDSFFKPP

rs:XP\_015494840 [XP\_015494840] PREDICTED: transcriptional coactivator  
YAP1 isoform X5 [Parus major]. 85..99

MDPGQPQTQQPPQAAQPPASQQQPPPQPPGAVSGAPAGAAQPPGAGPPPAGHQIVHVRGDSETDLEALF  
NAVMNPKGANVPHTLPMRLRKLKLPDSFFKPPEPKAHSRQASTDAGTAGALTPQHVRHSSPASLQLGAVSPGTLTP  
SGVVTGPGAPSSQHLRQSSFEIPDDVPLPPGWEMAKTPSGQRYFLNHIDQTTTWQDPRKAMLSQMNVTAPTSPSV  
QQNIMNSASAMNQRIQSAPVKQPPPLAPQSPQGGVMGGSSSNQQQQMRLQQLQMEKERLRLKHQELLRQVRPQA  
LRNINPSTANSPKHQELALRSQLPTMEQDGGSQNPVSSPGMSQELRTMTTNSDPFLNSGTYHSRDESTDSGLSM  
SSYSVPRTPDFFLNSVDEMDTGDSIGQSNIPSHQNRFPDYLEAIPGTNVDLGTLEGDGMNIEGEEMLPSLQEQALS  
SDILNDMESVLAATKLDKESFLTWL PMRLRKLKLPDSFFKPP

rs:XP\_015494849 [XP\_015494849] PREDICTED: transcriptional coactivator  
YAP1 isoform X6 [Parus major]. 85..99

MDPGQPQTQQPPQAAQPPASQQQPPPQPPGAVSGAPAGAAQPPGAGPPPAGHQIVHVRGDSETDLEALF  
NAVMNPKGANVPHTLPMRLRKLKLPDSFFKPPEPKAHSRQASTDAGTAGALTPQHVRHSSPASLQLGAVSPGTLTP  
SGVVTGPGAPSSQHLRQSSFEIPDDVPLPPGWEMAKTPSGQRYFLNHIDQTTTWQDPRKAMLSQMNVTAPTSPSV  
QQNIMNSASAMNQRIQSAPVKQPPPLAPQSPQGGVMGGSSSNQQQQMRLQQLQMEKERLRLKHQELLRQALRNI  
NPSTANSPKHQELALRSQLPTMEQDGGSQNPVSSPGMSQELRTMTTNSDPFLNSGTYHSRDESTDSGLSMSSYS  
VPRTPDFFLNSVDEMDTGDSIGQSNIPSHQNRFPDYLEAIPGTNVDLGTLEGDGMNIEGEEMLPSLQEQALS  
NDMESVLAATKLDKESFLTWL PMRLRKLKLPDSFFKPP

rs:XP\_015494859 [XP\_015494859] PREDICTED: transcriptional coactivator  
YAP1 isoform X7 [Parus major]. 85..99

MDPGQPQTQQPPQAAQPPASQQQPPPQPPGAVSGAPAGAAQPPGAGPPPAGHQIVHVRGDSETDLEALF  
NAVMNPKGANVPHTLPMRLRKLKLPDSFFKPPEPKAHSRQASTDAGTAGALTPQHVRHSSPASLQLGAVSPGTLTP  
SGVVTGPGAPSSQHLRQSSFEIPDDVPLPPGWEMAKTPSGQRYFLNHIDQTTTWQDPRKAMLSQMNVTAPTSPSV  
QQNIMNSASAMNQRIQSAPVKQPPPLAPQSPQGGVMGGSSSNQQQQMRLQQLQMEKERLRLKHQELLRQVRPQE  
LALRSQLPTMEQDGGSQNPVSSPGMSQELRTMTTNSDPFLNSGTYHSRDESTDSGLSMSSYSVPRTPDFFLNSV  
DEMDTGDSIGQSNIPSHQNRFPDYLEAIPGTNVDLGTLEGDGMNIEGEEMLPSLQEQALSSDILNDMESVLAATKL  
DKESFLTWL PMRLRKLKLPDSFFKPP

rs:XP\_015494867 [XP\_015494867] PREDICTED: transcriptional coactivator  
YAP1 isoform X8 [Parus major]. 85..99

MDPGQPQTQQPPQAAQPPASQQQPPPQPPGAVSGAPAGAAQPPGAGPPPAGHQIVHVRGDSETDLEALF  
NAVMNPKGANVPHTLPMRLRKLKLPDSFFKPPEPKAHSRQASTDAGTAGALTPQHVRHSSPASLQLGAVSPGTLTP  
SGVVTGPGAPSSQHLRQSSFEIPDDVPLPPGWEMAKTPSGQRYFLNHIDQTTTWQDPRKAMLSQMNVTAPTSPSV  
QQNIMNSASAMNQRIQSAPVKQPPPLAPQSPQGGVMGGSSSNQQQQMRLQQLQMEKERLRLKHQELLRQELALR  
SQLPTMEQDGGSQNPVSSPGMSQELRTMTTNSDPFLNSGTYHSRDESTDSGLSMSSYSVPRTPDFFLNSVDEMD  
TGDSIGQSNIPSHQNRFPDYLEAIPGTNVDLGTLEGDGMNIEGEEMLPSLQEQALSSDILNDMESVLAATKLDKES  
FLTWL PMRLRKLKLPDSFFKPP

rs:XP\_015497850 [XP\_015497850] PREDICTED: uncharacterized protein  
LOC107210955 [Parus major]. 169..183  
MAAGVIQPLAELRLPSPFFPHGLLLPTHPEPDFDFSEEEEEEEEEEEEEEEEEEDVEAVEESVRPELASVSST  
AETTLRLLKFSSELISCDIQRYFGRRGREEASSHPVPEDCGSPQSAEAVAEAVAPRDSFGATHRLGPLAELFEYGV  
HRCLPARVAGSRTQRLERKYGHITPMHRRKLPPSFWKEPGPGPASLLHTGTPDFSDLLANWTVEPGPELPGAGRE  
LPGRPGLEAEFFAGL PMHRRKLPPSFWKEP

rs:XP\_018862623 [XP\_018862623] PREDICTED: protein **FAM181A** [Parus major].  
128..142  
MASDSEVKTLNLFVNLASSDIKAALDKSAPCRRSVDHRKYLQKQLKRFSQKYSRIPRCHHPSKPPECGW  
RRGAEDRARGPLPEAPEPSSHGAAAEEKVMQTAEAEESLTGDRVLQEQKPEAARPDQVPMRKRQLPASFWEEPRP  
AQSLTARAFPASPEGLQAPRDPPPYEKKSRSPPDAAGPESPPDTAPHVGEKDPAGPLSGRVGAWTCCPFPCPGP  
GVFQPPGALPPSFPGLGLWRKSAAPLPAEVPHFCKEADGPGQKLYRPMVLKPIPTKPAIPPPPIFNVFYGL  
PMRKRQLPASFWEEP

rs:XP\_017958673 [XP\_017958673] PREDICTED: transcriptional coactivator  
yorkie [Drosophila navojoa]. 61..75  
MSLSNKSNISEKEIDDEDMLSPTKISTNLVVRVNQSDDDLQALFDSVLNPGDAKLPLQLPFRMRKLPN  
SFFNPPAPLHSRANSADSTYDGSQTNINKTAQPEIQPSLTQQNQPSHSRLAVHHFRARSSPASLQQNYNVRTRNE  
PSVNNTNTNQGPAYPEASVDFASASTANNIDLVDVINTCMGVPVGPDAALAAATQTTIHKKQRSYDVISPIQLQSQ  
LGALPPGWEQAKTNDGQIYYLK PFRMRKLNSFFNPP

rs:XP\_012812060 [XP\_012812060] PREDICTED: transcriptional coactivator  
YAP1 isoform X1 [Xenopus tropicalis]. 51..65  
MEPGSQPSAPAQPPPAGHQIVHVRSDSETDLEALFNAVMPKNNANVPQTLPMRMRKLPSFFKQPEPKS  
HSRQASTDGGAGALTPQHVRHSSPASLQLGAVSPGALSPPGVVPGPAPAPNAQHRLRQSSYEIPDDVPLPPGWE  
MAKTPSGQRYFLNHMEQTTTWDPRKAMLSQINLPAPTSPPVQONIMTPTGPLPDGWEQALTPEGETYFINHKNK  
TTSWLDPRLDPRFAMNQRLSQAAPVKSPPALPPQSPQSGVLGSGGNQQMRLQQLQMEKERLRLKHQELLRQEL  
ALRSQIPPEQDGGTQNPVCSTGISQEMRTMTMNSDPFLNSGTYHSRDESTDSGLSMSSYSVPRTPDDFLNSVD  
EMDTGEAITQSTIPTQQRNRPDYLETLPGTNVDLGTLEGEAMNVEGEELMPSLQEQALSSDILNDMESVLAATKLD  
KESFLTWL PMRMRKLPSFFKQP

rs:XP\_012812061 [XP\_012812061] PREDICTED: transcriptional coactivator  
YAP1 isoform X2 [Xenopus tropicalis]. 51..65  
MEPGSQPSAPAQPPPAGHQIVHVRSDSETDLEALFNAVMPKNNANVPQTLPMRMRKLPSFFKQPEPKS  
HSRQASTDGGAGALTPQHVRHSSPASLQLGAVSPGALSPPGVVPGPAPAPNAQHRLRQSSYEIPDDVPLPPGWE  
MAKTPSGQRYFLNHMEQTTTWDPRKAMLSQINLPAPTSPPVQONIMTPTAMNQRLSQAAPVKSPPALPPQSPQ  
SGVLGSGGNQQMRLQQLQMEKERLRLKHQELLRQVPRQELALRSQIPPEQDGGTQNPVCSTGISQEMRTMTMNSDP  
SSDPFLNSGTYHSRDESTDSGLSMSSYSVPRTPDDFLNSVDEMDTGEAITQSTIPTQQRNRPDYLETLPGTNVDL  
GTLEGEAMNVEGEELMPSLQEQALSSDILNDMESVLAATKLDKESFLTWL PMRMRKLPSFFKQP

rs:XP\_012812062 [XP\_012812062] PREDICTED: transcriptional coactivator  
YAP1 isoform X3 [Xenopus tropicalis]. 51..65  
MEPGSQPSAPAQPPPAGHQIVHVRSDSETDLEALFNAVMPKNNANVPQTLPMRMRKLPSFFKQPEPKS  
HSRQASTDGGAGALTPQHVRHSSPASLQLGAVSPGALSPPGVVPGPAPAPNAQHRLRQSSYEIPDDVPLPPGWE  
MAKTPSGQRYFLNHMEQTTTWDPRKAMLSQINLPAPTSPPVQONIMTPTAMNQRLSQAAPVKSPPALPPQSPQ  
SGVLGSGGNQQMRLQQLQMEKERLRLKHQELLRQELALRSQIPPEQDGGTQNPVCSTGISQEMRTMTMNSDP  
FLNSGTYHSRDESTDSGLSMSSYSVPRTPDDFLNSVDEMDTGEAITQSTIPTQQRNRPDYLETLPGTNVDLGTLE  
GEAMNVEGEELMPSLQEQALSSDILNDMESVLAATKLDKESFLTWL PMRMRKLPSFFKQP

rs:XP\_004912246 [XP\_004912246] PREDICTED: protein **FAM181B** [Xenopus  
tropicalis]. 158..172  
MAVQAPIMNHQFMFLYIPGSIADYEKQYQEGVDYLGSVESGDFKEATKDILLSFINTASSNIKLALDKPV  
KSKRKVNHRKYLQKQIKRCTGLMGNGNTNQSPKRSPTSPSNSSMSPSGFPCKPPTKRDSQSNLQSKSLAALFD  
NAKEIRGERCKKVLNRNRLPPSFFTEPESSGGLSTAGAALKDLGKCNQETLEFFDLLGSDYNNMSEQEI IQG  
ASVRVHQDVSAEQSLYEPHLLNGLLYSDMWNPCNQVKKSPVGTANLSLNETLKSAPLHSAMYTNTQDPAMASPM  
DDTCPGLTAYTPCFSSDCSLPQLFYDYNTQNYNRIISYPVV PLNRNRLPPSFFTEP

rs:XP\_017915372 [XP\_017915372] PREDICTED: transcriptional coactivator  
YAP1 isoform X1 [Capra hircus]. 84..98

MDPGPPPPQPAPQGQGGPPPAQGPQGGPPSASGQPAPPGPPAAPQAPPAGHQIVHVRGDSETDLEALFN  
AVMNPKTANVPQTVPMRLRKLKLPDSFFKPPPEPKSHSRQASTDAGTAGALTPQHVRHSSPASLQLGAVSPGTLTPT  
GVVSGPAAAPAAQHLRQSSFEIPDDVPLPAGWEMAKTSSGQRYFLNHIDQTTTWQDPRKAMLSQMNVTAPTSPPV  
QQNMMNSASGPLPDGWEQAMTQDGEIYYINHKNKTTSWLDPRLDPRFGKAMNQRISQSAPVKQPPPLAPQSPQGG  
VLGGGSSNQQQMRLQQLQMEKERLRLKQOELLRQVRPQAMRNINPSTANSPKCQELALRSQLPTLEQDGGTQNP  
VSSPGMSQELRTMTTNSDDPFLNSGTYHSRDESTDSGLSMSSYSVPRTPDFFLNSVDEMDTGDTINQSTLPSQQN  
RFPDYLEAIPGTNVDLGTLEGDGMNIEGEEELMPSLQEQALSSDILNDMESVLAATKLDKESFLTWL  
PMRLRKLKLPDSFFKPP

rs:XP\_017915373 [XP\_017915373] PREDICTED: transcriptional coactivator  
YAP1 isoform X2 [Capra hircus]. 84..98

MDPGPPPPQPAPQGQGGPPPAQGPQGGPPSASGQPAPPGPPAAPQAPPAGHQIVHVRGDSETDLEALFN  
AVMNPKTANVPQTVPMRLRKLKLPDSFFKPPPEPKSHSRQASTDAGTAGALTPQHVRHSSPASLQLGAVSPGTLTPT  
GVVSGPAAAPAAQHLRQSSFEIPDDVPLPAGWEMAKTSSGQRYFLNHIDQTTTWQDPRKAMLSQMNVTAPTSPPV  
QQNMMNSASGPLPDGWEQAMTQDGEIYYINHKNKTTSWLDPRLDPRFAMNQRISQSAPVKQPPPLAPQSPQGGVL  
GGGSSNQQQMRLQQLQMEKERLRLKQOELLRQVRPQAMRNINPSTANSPKCQELALRSQLPTLEQDGGTQNPVS  
SPGMSQELRTMTTNSDDPFLNSGTYHSRDESTDSGLSMSSYSVPRTPDFFLNSVDEMDTGDTINQSTLPSQQNR  
PDYLEAIPGTNVDLGTLEGDGMNIEGEEELMPSLQEQALSSDILNDMESVLAATKLDKESFLTWL  
PMRLRKLKLPDSFFKPP

rs:XP\_017915374 [XP\_017915374] PREDICTED: transcriptional coactivator  
YAP1 isoform X3 [Capra hircus]. 84..98

MDPGPPPPQPAPQGQGGPPPAQGPQGGPPSASGQPAPPGPPAAPQAPPAGHQIVHVRGDSETDLEALFN  
AVMNPKTANVPQTVPMRLRKLKLPDSFFKPPPEPKSHSRQASTDAGTAGALTPQHVRHSSPASLQLGAVSPGTLTPT  
GVVSGPAAAPAAQHLRQSSFEIPDDVPLPAGWEMAKTSSGQRYFLNHIDQTTTWQDPRKAMLSQMNVTAPTSPPV  
QQNMMNSASGPLPDGWEQAMTQDGEIYYINHKNKTTSWLDPRLDPRFGKAMNQRISQSAPVKQPPPLAPQSPQGG  
VLGGGSSNQQQMRLQQLQMEKERLRLKQOELLRQAMRNINPSTANSPKCQELALRSQLPTLEQDGGTQNPVSSP  
GMSQELRTMTTNSDDPFLNSGTYHSRDESTDSGLSMSSYSVPRTPDFFLNSVDEMDTGDTINQSTLPSQQNRFPD  
YLEAIPGTNVDLGTLEGDGMNIEGEEELMPSLQEQALSSDILNDMESVLAATKLDKESFLTWL  
PMRLRKLKLPDSFFKPP

rs:XP\_017915375 [XP\_017915375] PREDICTED: transcriptional coactivator  
YAP1 isoform X4 [Capra hircus]. 84..98

MDPGPPPPQPAPQGQGGPPPAQGPQGGPPSASGQPAPPGPPAAPQAPPAGHQIVHVRGDSETDLEALFN  
AVMNPKTANVPQTVPMRLRKLKLPDSFFKPPPEPKSHSRQASTDAGTAGALTPQHVRHSSPASLQLGAVSPGTLTPT  
GVVSGPAAAPAAQHLRQSSFEIPDDVPLPAGWEMAKTSSGQRYFLNHIDQTTTWQDPRKAMLSQMNVTAPTSPPV  
QQNMMNSASGPLPDGWEQAMTQDGEIYYINHKNKTTSWLDPRLDPRFAMNQRISQSAPVKQPPPLAPQSPQGGVL  
GGGSSNQQQMRLQQLQMEKERLRLKQOELLRQAMRNINPSTANSPKCQELALRSQLPTLEQDGGTQNPVSSPGM  
SQELRTMTTNSDDPFLNSGTYHSRDESTDSGLSMSSYSVPRTPDFFLNSVDEMDTGDTINQSTLPSQQNRFPDY  
EAIPGTNVDLGTLEGDGMNIEGEEELMPSLQEQALSSDILNDMESVLAATKLDKESFLTWL  
PMRLRKLKLPDSFFKPP

rs:XP\_017915376 [XP\_017915376] PREDICTED: transcriptional coactivator  
YAP1 isoform X5 [Capra hircus]. 84..98

MDPGPPPPQPAPQGQGGPPPAQGPQGGPPSASGQPAPPGPPAAPQAPPAGHQIVHVRGDSETDLEALFN  
AVMNPKTANVPQTVPMRLRKLKLPDSFFKPPPEPKSHSRQASTDAGTAGALTPQHVRHSSPASLQLGAVSPGTLTPT  
GVVSGPAAAPAAQHLRQSSFEIPDDVPLPAGWEMAKTSSGQRYFLNHIDQTTTWQDPRKAMLSQMNVTAPTSPPV  
QQNMMNSASGPLPDGWEQAMTQDGEIYYINHKNKTTSWLDPRLDPRFGKAMNQRISQSAPVKQPPPLAPQSPQGG  
VLGGGSSNQQQMRLQQLQMEKERLRLKQOELLRQVRPQELALRSQLPTLEQDGGTQNPVSSPGMSQELRTMTN  
SSDPFLNSGTYHSRDESTDSGLSMSSYSVPRTPDFFLNSVDEMDTGDTINQSTLPSQQNRFPDYLEAIPGTNVDL  
GTLEGDGMNIEGEEELMPSLQEQALSSDILNDMESVLAATKLDKESFLTWL PMRLRKLKLPDSFFKPP

rs:XP\_017915377 [XP\_017915377] PREDICTED: transcriptional coactivator  
YAP1 isoform X6 [Capra hircus]. 84..98

MDPGPPPPQPAPQGQGGPPPAQGPQGGPPSASGQPAPPGPPAAPQAPPAGHQIVHVRGDSETDLEALFN  
AVMNPKTANVPQTVPMRLRKLKLPDSFFKPPPEPKSHSRQASTDAGTAGALTPQHVRHSSPASLQLGAVSPGTLTPT  
GVVSGPAAAPAAQHLRQSSFEIPDDVPLPAGWEMAKTSSGQRYFLNHIDQTTTWQDPRKAMLSQMNVTAPTSPPV

QQNMMNSASGPLPDGWEQAMTQDGEIYYINHKNKTTSWLDPRLDPRFAMNQRISQSAPVKQPPPLAPQSPQGGVL  
GGGSSNQQQMRLQQLQMEKERLRLKQQELLRQVRPQELALRSQLPTLEQDGGTQNPVSSPGMSQELRMTTNS  
DPFLNSGTYHSRDESTDSGLSMSSYSVPRTPDFFLNSVDEMDTGDTINQSTLPSQQNRFPDYLEAIPGTNVDLGT  
LEGDGMNIEGEEMLPMSLQEQALSSDILNDMESVLAATKLDKESFLTWL PMRLRKLPSDFKPP

rs:XP\_017915378 [XP\_017915378] PREDICTED: transcriptional coactivator  
YAP1 isoform X7 [Capra hircus]. 84..98

MDPGPPPPQAPQGGQPPPAQGGPQGGPPSASGQPAPPGPPAAPQAPPAGHQIVHVRGDSETDLEALFN  
AVMNPKTANVPQTVPMRLRKLPSDFKPPPEPKSHSRQASTDAGTAGALTPQHVRHSSPASLQLGAVSPGTLTPT  
GVVSGPAAAPAAQHLRQSSFEIPDDVPLPAGWEMAKTSSGQRYFLNHIDQTTTWQDPRKAMLSQMNVTAPTSPV  
QQNMMNSASGPLPDGWEQAMTQDGEIYYINHKNKTTSWLDPRLDPRFGKAMNQRISQSAPVKQPPPLAPQSPQGG  
VLGGGSSNQQQMRLQQLQMEKERLRLKQQELLRQELALRSQLPTLEQDGGTQNPVSSPGMSQELRMTTNSSDP  
FLNSGTYHSRDESTDSGLSMSSYSVPRTPDFFLNSVDEMDTGDTINQSTLPSQQNRFPDYLEAIPGTNVDLGTLE  
GDGMNIEGEEMLPMSLQEQALSSDILNDMESVLAATKLDKESFLTWL PMRLRKLPSDFKPP

rs:XP\_017915379 [XP\_017915379] PREDICTED: transcriptional coactivator  
YAP1 isoform X8 [Capra hircus]. 84..98

MDPGPPPPQAPQGGQPPPAQGGPQGGPPSASGQPAPPGPPAAPQAPPAGHQIVHVRGDSETDLEALFN  
AVMNPKTANVPQTVPMRLRKLPSDFKPPPEPKSHSRQASTDAGTAGALTPQHVRHSSPASLQLGAVSPGTLTPT  
GVVSGPAAAPAAQHLRQSSFEIPDDVPLPAGWEMAKTSSGQRYFLNHIDQTTTWQDPRKAMLSQMNVTAPTSPV  
QQNMMNSASGPLPDGWEQAMTQDGEIYYINHKNKTTSWLDPRLDPRFAMNQRISQSAPVKQPPPLAPQSPQGGVL  
GGGSSNQQQMRLQQLQMEKERLRLKQQELLRQELALRSQLPTLEQDGGTQNPVSSPGMSQELRMTTNSSDPFL  
NSGTYHSRDESTDSGLSMSSYSVPRTPDFFLNSVDEMDTGDTINQSTLPSQQNRFPDYLEAIPGTNVDLGTLEGD  
GMNIEGEEMLPMSLQEQALSSDILNDMESVLAATKLDKESFLTWL PMRLRKLPSDFKPP

rs:XP\_017921371 [XP\_017921371] PREDICTED: protein **FAM181A** [Capra hircus].  
130..144

MASDSVDMKLLNFVNLASSDIKAALDKSAPCRRSVDHRKYLQKQLKRFSQKYSRLRPRGLPGRGAEPHLK  
RGPEDRPRPLPLESGHGSSPGGGGYKEKALGNPDREESLSKERTLHGPDPGAARPGQVPMRKRQLPASFWEEP  
RPTHSPVGLGGLGREGPPYEGKHKCKGLEPLGPETAPVPTSPRAPAEKEPLKMPGVSLVGRVSAWSCCFQY  
HGQPIYPSPPGALPQSPMPSLGLWRKSAASPGELAHFCKDAEGPGQKVYRPVVLKPIPTKPAVPPPIFNVFGYL  
PMRKRQLPASFWEEP

rs:XP\_004917131 [XP\_004917131] PREDICTED: protein **FAM181A** isoform X1  
[Xenopus tropicalis]. 144..158

MGHAGWIILSNGIACIDFVWKSFLNIMASDSEVKTLNLFVNLASCDIKAALDKSAPCRRSVDHRKYLQ  
KQLKRFSQKYSRLRPRCTPSKSVDLRKGLLDRQNTTSLNGLSEKSMHALETEESI IKDTFTQENSSEAGRDPQVP  
MRKRHLPASFWEEP RPSSSLELHCPSPDPDFKESTDTLLPLYETKRGKNLAIHESHSSSSFYPSSEDKESGKLP  
VASLTELVNACSCCFQYHGQAMYQHYPGELSSNPFTALALWSKSTVPTLELQHLCKESGQRIYRHVVVKPIPTK  
PAVHSSLFNVFGYI PMRKRHLPASFWEEP

rs:XP\_004917132 [XP\_004917132] PREDICTED: protein **FAM181A** isoform X2  
[Xenopus tropicalis].>rs:XP\_004917134 [XP\_004917134] PREDICTED: protein  
**FAM181A** isoform X2 [Xenopus tropicalis].>rs:XP\_004917133 [XP\_004917133]  
PREDICTED: protein **FAM181A** isoform X2 [Xenopus tropicalis]. 117..131

MASDSEVKTLNLFVNLASCDIKAALDKSAPCRRSVDHRKYLQKQLKRFSQKYSRLRPRCTPSKSVDLRKG  
LLDRQNTTSLNGLSEKSMHALETEESI IKDTFTQENSSEAGRDPQVPMRKRHLPASFWEEP RPSSSLELHCP  
RPDIFKESTDTLLPLYETKRGKNLAIHESHSSSSFYPSSEDKESGKLPVASLTELVNACSCCFQYHGQAMYQH  
YPGELSSNPFTALALWSKSTVPTLELQHLCKESGQRIYRHVVVKPIPTKPAVHSSLFNVFGYI  
PMRKRHLPASFWEEP

rs:XP\_013831224 [XP\_013831224] PREDICTED: protein **FAM181B** [Capra hircus].  
212..226

MAVQAALLSTHPFVFPFGGGSPDGLGGAFGALDKGCCFEDEETGTPAGSLLAGAESGDAREATRDLLESF  
IDSASSNIKALDKPGKSKRVNHRKYLQKQIKRCSGLMGAAPPGPSGAADMPAKRPLAGAQTVPVPAHGKAA  
PRREASQAAAAASLQSRSLAALFDSLHRVPGGADPARAAEAAPAGLVGGDTACSAGGPVAVGSRKVPPLRARNLP  
PSFFTEPSRAGGGGGGCGPSGPGVSLGDLEKGEAAEFFELLGPDYAGATEAGALLAAEPLDVFAGAAVLRGPP  
ELEPGLFESQPAMVGSLLYPEPWSAPGGPATKKPPLPAPGGGLTLNEPLRSVYPAAADSPGGDDGPGLLASFAPF  
FSDCALPPAPPPPPQVSYDYSAGYSRTAFPLWRPDGAWEGAPGEEGAPRD PLRARNLPSPFFTEP

rs:XP\_005157544 [XP\_005157544] protein **FAM181B** [Danio rerio]. 156..170  
MAVKAAIMNSQFLNFCFPGSVMDYEVENHLEGGLLSEEGCEGDFRETTRDLLSFIDSASSNIKLALDKP  
VSKSRKVNHRKYLQKQIKRCTGIIISPGAAQVQEPCKRQSLPQTSTSNLSSKTTPKKDGIQANLQSKSLAALFNPA  
KDVRGERAKKPLRHRNLPPSFFTEPANSSRVTSTSGMSLKDLEGRTPAAEFLELLGPDYSNMVSEQDLFNTTP  
IRIQQEVMTMGPEPFDSSHFFVTGGFLYTEPWGTCSSSTSKKSADMRTVPAQLNLYSHTDLSSSMPVEQSSPCALTF  
NFLTDCSTPPGSYDLANGYNRASFSLL PLRHRNLPPSFFTEP

rs:XP\_005173719 [XP\_005173719] transcriptional coactivator YAP1 isoform  
X1 [Danio rerio]. 45..59  
MDPNQHNPAGHQIVHVRGDSETDLEALFNAVMPKNTIVPPSVMRLRKLKLPDSFFTPPEPKSHSRQAS  
TDAGTAGTVPVPHVRAHSSPASLQLGAVSPGALTSMPANAPPQHLRQSSYEIPDDMPLPPGWEMAKTPSGQRYF  
LNHNDQTTTWQDPRKALLQMNQAAPASPVVQQQNMNPASAMNQQRISQSAPVKQGSQLPSSPQSGVMGNNPI  
RLQQIHIEKERLRIKQELLRQRPELALRNQLPTSMEQDGGTQNPVSSPGMGQDARNMTTNSSDPFLNSGTYSR  
DESTDSGLSMSSYSVPRTPDDFLNSVDEMETGDTLPGGSMATQPSRFPDYLDIAIPGTDVDLGTLEGESMAVEGEE  
LMPSLQEQALSSDILNDMESVLAATKIDKENFLTWL PMRLRKLKLPDSFFTPP

rs:XP\_005339213 [XP\_005339213] protein **FAM181A** [Ictidomys  
tridecemlineatus].>tr:I3N9S7 ICTTR [I3N9S7] SubName: Full=Family with  
sequence similarity 181 member A {ECO:0000313|Ensembl:ENSSTOP00000021124};  
129..143  
MASDSVVKMLLNFNVLASSDIKAALDKSAPCRRSVDHRKYLQKQLKRFSQKCSRLPRGLPGRAAEPLK  
RGPEDRPGRLPLHSGPGASPGGGGGCQEKALGNPWREERLPKEQSLQGGPDAAKPGQVPMRKRQLPASFWEEP  
PTHSYPLGLEGLGPREGPPYESSKKSCKGLES LGPETAPVPMSPRALADKEPLKMPGVSLVGRVDAWCCPLQYH  
GQPMYPGPPGALPHSQVPGCLLWRKSPASPGELALFCKEVEGAGQKVHRPVVLKPIPTKPAVPPPPIFNVFGYL  
PMRKRQLPASFWEEP

rs:XP\_001664241 [XP\_001664241] transcriptional coactivator yorkie isoform  
X1 [Aedes aegypti].>tr:A0A1S4G125\_AEDAE [A0A1S4G125] SubName:  
Full=Uncharacterized protein {ECO:0000313|VectorBase:AAEL014022-PA};  
59..73  
MAFNGPSNNTSAASNTSDENDGARKKENLILLVAKDSNDKLNELFDKTLNRLPLQIPLMRKLPDSF  
FKPPSSGSKSPSVSHSRENSADSAFGSGTTILGGVTTGPNGLPIHHSRAHSSPASLGKIPAGLVASINAANQQQQ  
QQSANNSSNVNSNKSQPGNVAGGGSGGDGPSAAVQQQQAQQQAQQQSLTRQAILHSRGRSYDVSNQHAHYGELPP  
GWEQAKTQDGRIYYLNHNTRTTTTWEDPRITAAMQQESLQQQQQSSVETLFTNTGSQTLLSPTISSPTPTNNVVS  
DSIEMSNDLPAPAPAPSNVSMNLNSNVNLGPLEGWEEGITAKGERYYINHATRTTWRDPRLSNQDWAAQEQS  
VRLYNLQLERERLRRRQQEIRSHIGEDPFLSGLTDHSRQESGDSGLSESSTSQSMPTPDFLSSIDDSMDGLSMA  
DNTMDTIAFGDNLETPDEFMLDDPLLEKIDAVSNLNLIDPSSTKPDNTLYDII PLMRKLPDSFFKPP

rs:XP\_021696614 [XP\_021696614] transcriptional coactivator yorkie isoform  
X2 [Aedes aegypti]. 59..73  
MAFNGPSNNTSAASNTSDENDGARKKENLILLVAKDSNDKLNELFDKTLNRLPLQIPLMRKLPDSF  
FKPPSSGSKSPSVSHSRENSADSAFGSGTTILGGVTTGPNGLPIHHSRAHSSPASLGKIPAGLVASINAANQQQQ  
QQSANNSSNVNSNKSQPGNVAGGGSGGDGPSAAVQQQQAQQQAQQQSLTRQAILHSRGRSYDVSNQHAHYGELPP  
GWEQAKTQDGRIYYLNHNTRTTTTWEDPRITAAMQQESLQQQQQSSVETLFTNTGSQTLLSPTISSPTPTNNANQD  
WAAQEQSVRLYNLQLERERLRRRQQEIRSHIGEDPFLSGLTDHSRQESGDSGLSESSTSQSMPTPDFLSSIDDS  
MDGLSMADNTMDTIAFGDNLETPDEFMLDDPLLEKIDAVSNLNLIDPSSTKPDNTLYDII  
PLMRKLPDSFFKPP

rs:XP\_019616212 [XP\_019616212] PREDICTED: transcriptional coactivator  
YAP1-like isoform X1 [Branchiostoma belcheri]. 37..51  
MDAQQRQVLSHGDPEGDLEKLF AAVMNKKEGQPVSVPMRMRNLPPSFFNPPPDRAKGGASAAAYPGPPP  
TSQMSPHNLPIAHSRAHSSPASLQATQQASAQQFQHLRQOSYDPTAMDDLGLPLPPGWEMAHTASGQRYLNNHNQ  
TTTTWEDPRKSLSTSSLNQPQSPAGTPVRSPPGMSPLSPSPAHSQQGLNNINNIPLPEGWEQATTPEGEIYFINHR  
TQTTTDLDPRLAMMQRQOSIPQHQQPPYQARSPTPQQQAQVNEQQRQQLRQLQLERERLRMRQEIQIMQEQEMA  
LRAGQMPPEEQMNVAGMPPASQAAVSSASQNPTQTSSEMQAVTTTGMDFLSSGTPYHSRDESADSLGMSNYSL  
PRTPEDFLSNVDEMDSSENTGAEKMQTSRPNSTQPPGGRGMPDILDMTMQGTNVDLGFPELESSNVDSSEELVPSL  
QEQALNSDILNDVENMLSPSKIDNFLTWL PMRMRNLPPSFFNPP



rs:XP\_019616213 [XP\_019616213] PREDICTED: transcriptional coactivator YAP1-like isoform X2 [Branchiostoma belcheri]. 37..51

MDAQQGRQVLSHGDPEGDLKLF AAVMNKKEGQPVSVPMRMRNLPPSFFNPPPDRAKGGASAAAYPGPPP  
TSQMSPHNLPIAHSRAHSSPASLQATQQASAQQFQHLRQQSYDPTAMDDLGLPLPPGWEMAHTASGQRYLNNHNQ  
TTTWEDPRKSLSTSSLNQPQSPAGTPVRSPPGMSPLSPSPAHSQQGLNNINNIPLPEGWEQATTPEGEIYFINHR  
TQTTTWLDPRLAMMQRQOSIPQHQQPPYQARSPTPQQQAQVNEQQRQQKLRQLQLERERLRMRQEIQIMQQMAL  
RAGQMPEEQMNVAGMPPASQA AVSSASQNPTQTSSEMQAVTTTGMDPFLSSGTPYHSRDESADSGLGMSNYS  
LPRTPEDFLSNVDEMDTSENTGAEKMQTSRPNSTQPPQGGRGMPDILD TMQGTNVDLGFPE TESSNVDSEELVPSLQ  
EALNSDILNDVENMLSPSKIDNFLTWL PMRMRNLPPSFFNPP

rs:XP\_019616214 [XP\_019616214] PREDICTED: transcriptional coactivator YAP1-like isoform X3 [Branchiostoma belcheri]. 37..51

MDAQQGRQVLSHGDPEGDLKLF AAVMNKKEGQPVSVPMRMRNLPPSFFNPPPDRAKGGASAAAYPGPPP  
TSQMSPHNLPIAHSRAHSSPASLQATQQASAQQFQHLRQQSYDPTAMDDLGLPLPPGWEMAHTASGQSHNNQTTT  
WEDPRKSLSTSSLNQPQSPAGTPVRSPPGMSPLSPSPAHSQQGLNNINNIPLPEGWEQATTPEGEIYFINHRTQTT  
TWLDPRLAMMQRQOSIPQHQQPPYQARSPTPQQQAQVNEQQRQQKLRQLQLERERLRMRQEIQIMQQEMALRAG  
QMPEEQMNVAGMPPASQA AVSSASQNPTQTSSEMQAVTTTGMDPFLSSGTPYHSRDESADSGLGMSNYS  
LPRTPEDFLSNVDEMDTSENTGAEKMQTSRPNSTQPPQGGRGMPDILD TMQGTNVDLGFPE TESSNVDSEELVPSLQ  
EALNSDILNDVENMLSPSKIDNFLTWL PMRMRNLPPSFFNPP

rs:XP\_019621851 [XP\_019621851] PREDICTED: protein **FAM181B**-like [Branchiostoma belcheri]. 165..179

MRLDMSDSSPLLMELHPPPHPSQRLSPGATPGSNPSPSPSHSPACPSPRSSEVETD SLLSFMDTACNSI  
KLALDRPSRSRRKVNHRKYLQKQIKRCTQKLSPGDGENDDKDDNASDKEAATANKPVSRRD SHIGVQSKSLAALF  
DPNTLKRPNVNPAPTRGRTRVPLRKRNLPPSFFTEPGNQSGHRGSLQTC AVAGSWPLDGYRHPAAGVSDSLDIFNP  
DIADLITNWQDESGHISDP SMPAMPGNSTMG MAGSGDHAPIMLHMPSQPYGTNFMNMFPAQSQSNQGLLTAPQS  
WMPSTPSYPSTPSSNYTASREDYSRVGYQASSSAGLSSSLYAPQVHQMPNGLPDFPQA FGHGQAAIGQQWPNSLC  
YTYL PLRKRNLPPSFFTEP

rs:XP\_019637758 [XP\_019637758] PREDICTED: uncharacterized protein LOC109480050 [Branchiostoma belcheri]. 134..148

MAGKTGGKVGFPSSGKVG FSSGKRGAPAVSSSDEEEIEKEVQE KEDYENIASPCSSTSSGVPYERQPG  
FEKHGHEVVVPRRPKIKHKIKRKKMTNFMLGGDHD FYTASRGRKDGTMVPTPPSKGKPKRDTVPMRLRALPQSF  
WQQPNNMNNNSPGSLYPVLPV VVNEVSD EYLGQVVSVPTEIRPVT PPEERTETDQQERTGRKEEETVVTKPEKT  
VEKVAVKEDKEKTEKEKSEKEKTEKEKTEKEVKK EKIDLVEEGVTGATVTVTTTAPPRTRVTVTSTVPNTDLL  
FSLFDGVDPETKRQTVKLRGRPKRIHLEGMNAPRPRS QDNDPYMVDNIAERLFPVLSLENRKQNTNPANPNVTT  
TLHYITLNGEDEKSSVSLPAVRVETNYSQMLSELVMHI PMRLRALPQSFWQQP

rs:XP\_019642504 [XP\_019642504] PREDICTED: protein **FAM181A**-like [Branchiostoma belcheri]. 165..179

MTQGEENAICGRAERTLQQARKCKMAQSGGATADADVKTLLNFVN LASSDIKAALDKSAPCKRSVDHR  
KYLQKQLKRFSQRRVLPYVARPVKDTTSFLKRRPESTSSVNSESSGSGSESCSESGPILPENCNPIDL SMPDKD  
QPVEKDQELGLQDPAAADSVPLRKRALPASFWQEPGVQKQSSGSGGSPSAE ESECS PGKQDAKPTGETTSVPPR  
ITNHGLDRFPTAVPPAPLGYLPYHGYPYLYGVPPPPCGFDPTQSLGHS AQGLAQAPGLCPRPKEAACSCCLGQN  
TTVSAAYS RFPYGHHPGYVSVPHSPLAAHAPYSPWPWERTNPPSSSSSSPTTTKPKIWRPIPTKTVSTFPTRFHP  
LHM PLRKRALPASFWQEP

rs:XP\_019804223 [XP\_019804223] PREDICTED: protein **FAM181B** [Tursiops truncatus].>tr:A0A2U4CFK5\_TURTR [A0A2U4CFK5] SubName: Full=protein **FAM181B** {ECO:0000313|RefSeq:XP\_019804223.1}; 221..235

MAVQAALLSTHPFVFPFGGSPDGLGSAFGALDKGCCFEDEETGTPAGALLAGAEGGDVREATRDL LSF  
IDSASSNIKLALDKPGKSKRKNVHRKYLQKQIKRCSGLMGAAPP GPPSPGAADTPAKRPLAATS AQTVPVQAHGK  
AAPRREASQAAAAASLQSLSLAALFDSL SHVPGAADPAGVAEAPAAAGLVGAGAGGVGDDAAGPAGVPAVPGARK  
VPLRARNLPPSFFTEPSRAGGGGCGSPGPGVSLGDLEKGA EAAEFFEMLGPDYAGTEAGVLLAAEPLDVLLTGA  
AVLRGPPELEPGLFEP PAMGGSLLYPEPWSAPGGPTTKKSPLAAPRGGLTLNEPLRPLYPAAADS PGDDGPGLL  
LASFTFFSDCAVPPPPPPPPQVSYDYSAGYSRTAYASLWRPDGIWEGAPGEEGAHRD PLRARNLPPSFFTEP

rs:XP\_019810914 [XP\_019810914] PREDICTED: protein **FAM181B** [Bos indicus]. 214..228

MAVQAALLSTHPFVPGFGGSPDGLGGAFGALXKGCCFEDEETGTPAGALLAGAESGDAREATRDLLSF  
IDSASSNIKLALDKPGKSKRVNHRKYLQKQIKRCSGLMGXXXXXXXXXXXXXXXXXXXXXXXXXXXXXXXXXXXX  
XXXXXXXXXXXXXXXXXSLQSRSLAALFDSLRLHVPGGADPAGVAEAVPAAGLVRGDAAGSAGGPAVPGARKVPLRARN  
LPPSFFTEPSRAGGCVCGPSGPGVSLGDLEKGEAAEFFELLGPDYAGTEAGALLAAEPLDVFPAGAAVLRGPP  
ELEPGLFDPQAMVGSLLYPEPWSAPGGPATKKPPLPAPGGGLTLNEPLRSVYPAAADSPGGDDGPGLLASFTPF  
FSDCALPPAPPPQVSYDYSAGYSRTAFAGLWRPDGAWEGAPGEEGAPRD PLRARNLPPSFFTEP

rs:XP\_022116627 [XP\_022116627] transcriptional coactivator YAP1-A isoform  
X1 [*Pieris rapae*]. 43..57

MALNSDEQKSNLVLVRVDQSDSVLQSLFDTVLKPDSCRPLQVPLRMRQLPKSFFNPPSTGSKSPSVSHS  
RENSADSAFGSSSATGSAPVSHSRAHSSPASLQQTAAAGQQNQPPPLHHQHTKQRSYDVGSHLPDELGPLPAGWE  
QARTPEGQIYYLNHITKTTTWEPRKTLAAQTVASGVQHQSAAEALLTQTPSPQNLPTPTPAAKSTSTSATTDPLG  
PLPDGWEQATTPEGEIYFINHAARTTSWFDPRIPQHLQRTPAANAGAAGGGWANASVQACQQKRLQLSLQLERER  
LKQRQOEIRLQOELMARQSSSIVSSLTNSTATSTDLSLDFPLPGLNDHQEQESADSGLGMVAVSQQSYMPHTPEGF  
LGMDDRMDCSTSEAGANLDTDMALGDTDDLLGDFDNDILLDDVQSLINSTPNKPDNVLTWL  
PLRMRQLPKSFFNPP

rs:XP\_022116628 [XP\_022116628] transcriptional coactivator yorkie isoform  
X2 [*Pieris rapae*]. 43..57

MALNSDEQKSNLVLVRVDQSDSVLQSLFDTVLKPDSCRPLQVPLRMRQLPKSFFNPPSTGSKSPSVSHS  
RENSADSAFGSSSATGSAPVSHSRAHSSPASLQQTAAAGQQNQPPPLHHQHTKQRSYDVGSHLPDELGPLPAGWE  
QARTPEGQIYYLNHITKTTTWEPRKTLAAQTVASGVQHQSAAEALLTQTPSPQNLPTPTPAQHLQRTPAANAGAA  
GGGWANASVQACQQKRLQLSLQLERERLQQRQOEIRLQOELMARQSSSIVSSLTNSTATSTDLSLDFPLPGLNDH  
QRQESADSGLGMVAVSQQSYMPHTPEGFGLGMDDRMDCSTSEAGANLDTDMALGDTDDLLGDFDNDILLDDVQSLINS  
TPNKPDNVLTWL PLRMRQLPKSFFNPP

rs:XP\_022449645 [XP\_022449645] protein **FAM181B** [*Delphinapterus*  
*leucas*].>tr:A0A2Y9PVX0\_DELLE [A0A2Y9PVX0] SubName: Full=protein **FAM181B**  
{ECO:0000313|RefSeq:XP\_022449645.1}; 221..235

MAVQAALLSTHPFVPGFGGSPDGLGSAFGALDKGCCFEDEETGTPAGALLVGAEGGDVREATRDLLSF  
IDSASSNIKLALDKPGKSKRVNHRKYLQKQIKRCSGLMGAAPPGPSGAADTPAKRPLAAASAQTVPVQAHGK  
AAPPREASQAAAAASLQSQSLAALFDSLHVPGAADPAGVAEAAAPAAGLVGAGAGGVGDAAGPAGGPAVPGARK  
VPLRARNLPPSFFTEPSRAGGGCGPSGPGVSLGDLEKGAEEAEFFEMLGPDYAGTEAGVLLAAEPLDVLLTGA  
AVLRGPPPELEPGLFEPMPAMGGSLLYPEPWSAPGGPTTKKSSLAAPRSGTLNEPLRPLYPAAADSPGGDDGPG  
LASFSPPFFSDCALPPPPPPQVSYDYSAGYSRTAYASLWRPDGIWEGAPGEEGAHRD PLRARNLPPSFFTEP

rs:XP\_022417753 [XP\_022417753] transcriptional coactivator YAP1 isoform  
X1 [*Delphinapterus leucas*].>tr:A0A2Y9MKS8\_DELLE [A0A2Y9MKS8] SubName:  
Full=transcriptional coactivator YAP1 isoform X1  
{ECO:0000313|RefSeq:XP\_022417753.1}; 86..100

MDPGQQQPPPPQAPQGGQPPAQPQGGQPPSGPGQTAPPGSQAAPQAPPAGHQIVHVRGDSETDLEAL  
FNAVMNPKTANVPQTVPMRLRKLKLPDSFFKPPPEPKSHSRQASTDAGTAGALTPQHVRHSSPASLQLGAVSPGTLT  
PTGVVSGPAATPTAQHLRQSSFEIPDDVPLPAGWEMAKTSSGQRYFLNHIDQTTTWQDPRKAMLSQMNVTSP  
PVQONMMNSASGPLPDGWEQAMTQDGEIYYINHKNKTTSWLDPRLDPRFGKAMNQRISQSAPVKQPPPLAPQSPQ  
GGVMGGNSNQQQMRLQQLQMEKERLRLKQOELLRQVRPQAMRNINPSTANSPKCQELALRSQLPTLEQDGGTQ  
NPVSSPGMSQELRTMTTSSDPFLNSGTYHSRDESTDSGLSMSSYSVPRTPDDFLNSVDEMDTGDTINQSTLPSQ  
QNRFPDYLEAIPGTNVDLGTLEGDMNIEGELMPSLQEQALSSDILNDMESVLAATKLDKESFLTWL  
PMRLRKLKLPDSFFKPP

rs:XP\_022417754 [XP\_022417754] transcriptional coactivator YAP1 isoform  
X2 [*Delphinapterus leucas*].>tr:A0A2Y9M6I5\_DELLE [A0A2Y9M6I5] SubName:  
Full=transcriptional coactivator YAP1 isoform X2  
{ECO:0000313|RefSeq:XP\_022417754.1}; 86..100

MDPGQQQPPPPQAPQGGQPPAQPQGGQPPSGPGQTAPPGSQAAPQAPPAGHQIVHVRGDSETDLEAL  
FNAVMNPKTANVPQTVPMRLRKLKLPDSFFKPPPEPKSHSRQASTDAGTAGALTPQHVRHSSPASLQLGAVSPGTLT  
PTGVVSGPAATPTAQHLRQSSFEIPDDVPLPAGWEMAKTSSGQRYFLNHIDQTTTWQDPRKAMLSQMNVTSP  
PVQONMMNSASGPLPDGWEQAMTQDGEIYYINHKNKTTSWLDPRLDPRFAMNQRISQSAPVKQPPPLAPQSPQGG  
VMGGNSNQQQMRLQQLQMEKERLRLKQOELLRQVRPQAMRNINPSTANSPKCQELALRSQLPTLEQDGGTQNP  
VSSPGMSQELRTMTTSSDPFLNSGTYHSRDESTDSGLSMSSYSVPRTPDDFLNSVDEMDTGDTINQSTLPSQQN

RFPDYLEAIPGTNVDLGTLEGDMNIEGEEELMPSLQEQALSSDILNDMESVLAATKLDKESFLTWL  
PMRLRKLPSFFKPP

rs:XP\_022417755 [XP\_022417755] transcriptional coactivator YAP1 isoform  
X3 [Delphinapterus leucas].>tr:A0A2Y9M7Q0\_DELLE [A0A2Y9M7Q0] SubName:  
Full=transcriptional coactivator YAP1 isoform X3  
{ECO:0000313|RefSeq:XP\_022417755.1}; 86..100

MDPGQQQPPPQPAPQGQGGQPPAQQPPQGQGGPPSGPGQTAPPGSQAAPQAPPAGHQIVHVRGDSETDLEAL  
FNAVMNPKTANVPQTVPMRLRKLPSFFKPPPEPKSHSRQASTDAGTAGALTPQHVRHSSPASLQLGAVSPGTLT  
PTGVVSGPAATPTAQHLRQSSFEIPDDVPLPAGWEMAKTSSGQRYFLNHIDQTTTWQDPRKAMLSQMNVTSP  
PVQQNMMNSASGPLPDGWEQAMTQDGEIYYINHKNKTTSWLDPRLDPRFGKAMNQRISQSAPVKQPPPLAPQSPQ  
GGVMGGNSNQQQMRLQQLQMEKERLRLKQEQELLRQAMRNINPSTANSPKCQELALRSQLPTLEQDGGTQNPVS  
SPGMSQELRTMTTNSDDPFLNSGTYHSRDESTDSGLSMSSYSVPRTPDDFLNSVDEMDTGDTINQSTLPSQQNRF  
PDYLEAIPGTNVDLGTLEGDMNIEGEEELMPSLQEQALSSDILNDMESVLAATKLDKESFLTWL  
PMRLRKLPSFFKPP

rs:XP\_022417756 [XP\_022417756] transcriptional coactivator YAP1 isoform  
X4 [Delphinapterus leucas].>tr:A0A2Y9M9S8\_DELLE [A0A2Y9M9S8] SubName:  
Full=transcriptional coactivator YAP1 isoform X4  
{ECO:0000313|RefSeq:XP\_022417756.1}; 86..100

MDPGQQQPPPQPAPQGQGGQPPAQQPPQGQGGPPSGPGQTAPPGSQAAPQAPPAGHQIVHVRGDSETDLEAL  
FNAVMNPKTANVPQTVPMRLRKLPSFFKPPPEPKSHSRQASTDAGTAGALTPQHVRHSSPASLQLGAVSPGTLT  
PTGVVSGPAATPTAQHLRQSSFEIPDDVPLPAGWEMAKTSSGQRYFLNHIDQTTTWQDPRKAMLSQMNVTSP  
PVQQNMMNSASGPLPDGWEQAMTQDGEIYYINHKNKTTSWLDPRLDPRFAMNQRISQSAPVKQPPPLAPQSPQGG  
VMGGNSNQQQMRLQQLQMEKERLRLKQEQELLRQAMRNINPSTANSPKCQELALRSQLPTLEQDGGTQNPVSSP  
GMSQELRTMTTNSDDPFLNSGTYHSRDESTDSGLSMSSYSVPRTPDDFLNSVDEMDTGDTINQSTLPSQQNRF  
PDYLEAIPGTNVDLGTLEGDMNIEGEEELMPSLQEQALSSDILNDMESVLAATKLDKESFLTWL  
PMRLRKLPSFFKPP

rs:XP\_022417757 [XP\_022417757] transcriptional coactivator YAP1 isoform  
X5 [Delphinapterus leucas].>tr:A0A2Y9MFF0\_DELLE [A0A2Y9MFF0] SubName:  
Full=transcriptional coactivator YAP1 isoform X5  
{ECO:0000313|RefSeq:XP\_022417757.1}; 86..100

MDPGQQQPPPQPAPQGQGGQPPAQQPPQGQGGPPSGPGQTAPPGSQAAPQAPPAGHQIVHVRGDSETDLEAL  
FNAVMNPKTANVPQTVPMRLRKLPSFFKPPPEPKSHSRQASTDAGTAGALTPQHVRHSSPASLQLGAVSPGTLT  
PTGVVSGPAATPTAQHLRQSSFEIPDDVPLPAGWEMAKTSSGQRYFLNHIDQTTTWQDPRKAMLSQMNVTSP  
PVQQNMMNSASGPLPDGWEQAMTQDGEIYYINHKNKTTSWLDPRLDPRFGKAMNQRISQSAPVKQPPPLAPQSPQ  
GGVMGGNSNQQQMRLQQLQMEKERLRLKQEQELLRQVRPQELALRSQLPTLEQDGGTQNPVSSPGMSQELRTMT  
TNSDDPFLNSGTYHSRDESTDSGLSMSSYSVPRTPDDFLNSVDEMDTGDTINQSTLPSQQNRFDPDYLEAIPGTN  
VDLGTLEGDMNIEGEEELMPSLQEQALSSDILNDMESVLAATKLDKESFLTWL PMRLRKLPSFFKPP

rs:XP\_022417758 [XP\_022417758] transcriptional coactivator YAP1 isoform  
X6 [Delphinapterus leucas].>tr:A0A2Y9MKT3\_DELLE [A0A2Y9MKT3] SubName:  
Full=transcriptional coactivator YAP1 isoform X6  
{ECO:0000313|RefSeq:XP\_022417758.1}; 86..100

MDPGQQQPPPQPAPQGQGGQPPAQQPPQGQGGPPSGPGQTAPPGSQAAPQAPPAGHQIVHVRGDSETDLEAL  
FNAVMNPKTANVPQTVPMRLRKLPSFFKPPPEPKSHSRQASTDAGTAGALTPQHVRHSSPASLQLGAVSPGTLT  
PTGVVSGPAATPTAQHLRQSSFEIPDDVPLPAGWEMAKTSSGQRYFLNHIDQTTTWQDPRKAMLSQMNVTSP  
PVQQNMMNSASGPLPDGWEQAMTQDGEIYYINHKNKTTSWLDPRLDPRFAMNQRISQSAPVKQPPPLAPQSPQGG  
VMGGNSNQQQMRLQQLQMEKERLRLKQEQELLRQVRPQELALRSQLPTLEQDGGTQNPVSSPGMSQELRTMTN  
SSDDPFLNSGTYHSRDESTDSGLSMSSYSVPRTPDDFLNSVDEMDTGDTINQSTLPSQQNRFDPDYLEAIPGTN  
VDLGTLEGDMNIEGEEELMPSLQEQALSSDILNDMESVLAATKLDKESFLTWL PMRLRKLPSFFKPP

rs:XP\_022417759 [XP\_022417759] transcriptional coactivator YAP1 isoform  
X7 [Delphinapterus leucas].>tr:A0A2Y9M6J0\_DELLE [A0A2Y9M6J0] SubName:  
Full=transcriptional coactivator YAP1 isoform X7  
{ECO:0000313|RefSeq:XP\_022417759.1}; 86..100

MDPGQQQPPPQPAPQGQGGQPPAQQPPQGQGGPPSGPGQTAPPGSQAAPQAPPAGHQIVHVRGDSETDLEAL  
FNAVMNPKTANVPQTVPMRLRKLPSFFKPPPEPKSHSRQASTDAGTAGALTPQHVRHSSPASLQLGAVSPGTLT

PTGVVSGPAATPTAQHLRQSSFEIPDDVPLPAGWEMAKTSSGQRYFLNHIDQTTTWQDPRKAMLSQMNVTSP  
PVQQNMNSASGPLPDGWEQAMTQDGEIYYINHKNKTTSWLDPRLDPRFGKAMNQRISQSAPVKQPPPLAPQSPQ  
GGVMGGNSNQQQMRLQQLQMEKERLRLKQOELLRQELALRSQLEPTLEQDGGTQNPVSSPGMSQELRTMTNNS  
DPFLNSGTYHSRDESTDSGLSMSSYSVPRTPDFFLNSVDEMDTGDTINQSTLPSQQNRFPDYLEAIPGTNVDLGT  
LEGDGMNIEGEEELMPSLQEQALSSDILNDMESVLAATKLDKESFLTWL PMRLRKLKLPDSFFKPP

rs:XP\_022417760 [XP\_022417760] transcriptional coactivator YAP1 isoform  
X8 [Delphinapterus leucas].>tr:A0A2Y9M7Q6\_DELLE [A0A2Y9M7Q6] SubName:  
Full=transcriptional coactivator YAP1 isoform X8  
{ECO:0000313|RefSeq:XP\_022417760.1}; 86..100

MDPGQQQPPQPAPQGGQPPAQPQGGQPPSGPGQTAPPGSQAAPQAPPAGHQIVHVRGDSETDLEAL  
FNAVMPKNTANVPQTVPMRLRKLKLPDSFFKPPPEPKSHSRQASTDAGTAGALTPQHVAHSSPASLQLGAVSPGTLT  
PTGVVSGPAATPTAQHLRQSSFEIPDDVPLPAGWEMAKTSSGQRYFLNHIDQTTTWQDPRKAMLSQMNVTSP  
PVQQNMNSASGPLPDGWEQAMTQDGEIYYINHKNKTTSWLDPRLDPRFAMNQRISQSAPVKQPPPLAPQSPQGG  
VMGGNSNQQQMRLQQLQMEKERLRLKQOELLRQELALRSQLEPTLEQDGGTQNPVSSPGMSQELRTMTNNSDP  
FLNSGTYHSRDESTDSGLSMSSYSVPRTPDFFLNSVDEMDTGDTINQSTLPSQQNRFPDYLEAIPGTNVDLGTLE  
GDGMNIEGEEELMPSLQEQALSSDILNDMESVLAATKLDKESFLTWL PMRLRKLKLPDSFFKPP

rs:XP\_022617223 [XP\_022617223] transcriptional coactivator YAP1 [Seriola  
dumerili].>rs:XP\_023260693 [XP\_023260693] transcriptional coactivator YAP1  
[Seriola lalandi dorsalis].>tr:A0A3B4V6L6\_SERDU [A0A3B4V6L6] SubName:  
Full=Yes-associated protein 1 {ECO:0000313|Ensembl:ENSSDUP00000026252};  
45..59

MDPSQHNPPAGHQIVHVRGDSETDLEALFNAVMPKSTIVPPSVPMRMRKLKLPDSFFKPPPEPKSHSRQAS  
TDAGSGGALTPHHVRAHSSPASLQLGAVSGGSLSGMASAGASPOHLRQSSYEIPDDVPLPPGWEMAKTASGQRYF  
LNHIDQTTTWQDPRKALLQMNQAAPASSVPVQQNLMPASGPLEGWEQAITSEGEIYYINHKNKTTSWLDPRL  
DQRYALNQQRITQSAPVKQGGQLPPSHSAVMGANNQMLQQIEKERLRLKQOELLRQRPQELALRNQLPTSMDQD  
GSTNPVSSPMAQDARTMTANSSDPFLNSGTYHSRDESTDSGLSMSSYSVPRTPDFFLNSVDEMDTGDP  
LPPSMAT  
QPSRFPDYLDIAIPGTDVLDLGTLEGESMAVEGEEELMPSLQEQALSSDILNDMESVLAATKIDKESFLTWL  
PMRMRKLKLPDSFFKPP

rs:XP\_022618502 [XP\_022618502] transcriptional coactivator YAP1-like  
isoform X1 [Seriola dumerili].>tr:A0A3B4TH51\_SERDU [A0A3B4TH51] SubName:  
Full=Uncharacterized protein {ECO:0000313|Ensembl:ENSSDUP00000005524};  
46..60

MDAHRGAPPAGQQIVHVRGDSQTELEALFSAVMNPSKATRQPASLPMRMRKLKLPDSFFRQPDPRGHSRQA  
SSDGGVCGSLTPHHVRAHSSPASLPVNSLSTQATDVAAPQIIPDDVPLPHGWEMAKTPAGQRYFLNHLDKTTTWH  
DPRLSQLQSAQAHPISGTPVHAHSLSNPAPTTQPQINPETGPLPEGWEQAVTADGEVYIDHINKTTTWWVAPR  
LAQKMNPGILGLALQQRQEKERLRCKGLPPQITPQEAGGRNQMTGGMDHNRNAPTLVPSLDVIRSSNHEPTLNG  
AHSRNESTDSGLSVSSLPRTSDHMLSSVDHMDTGDSGDNSSMTLQESMPVLPMSGEELMPCIEGLSSDLLMMD  
ETVLSGSHMDRDSLTLWL PMRMRKLKLPDSFFRQP

rs:XP\_025321528 [XP\_025321528] transcriptional coactivator YAP1 isoform  
X1 [Canis lupus dingo]. 84..98

MDPGPPPPAAPPQAQGGPPSAPPPPGQAPPSAPGPPAPPQSQAAPQAPPAGHQIVHVRGDSETDLEALFN  
AVMNPNTANVPQTVPMRLRKLKLPDSFFKPPPEPKAHSRQASTDAGTAGALTPQHVAHSSPASLQLGAVSPGTLTPT  
GVSSGPAAPSAQHLRQSSFEIPDDVPLPAGWEMAKTSSGQRYFLNHIDQTTTWQDPRKAMLSQMSVTAPTSPPV  
QQSMNTSASGPLPDGWEQAMTQDGEIYYINHKNKTTSWLDPRLDPRFAMNQRISQSAPVKQPPPLAPQSPPGVLG  
GGSSQQQQMRLQQLQMEKERLRLKQOELLRQVRPQAMRNISPSTANSKQELALRSQLEPTLEQDGGTNPVPS  
PGMSQELRTMTTSGSDPFLNSGTYHSRDESTDSGLSMSSYSVPRTPDFFLNSVDEMDTGDTINQSTLPSQQNRFP  
DYLEAIPGTNVDLGTLEGDGMNIEGEEELMPSLQEQALSSDILNDMESVLAATKLDKESFLTWL  
PMRLRKLKLPDSFFKPP

rs:XP\_025321529 [XP\_025321529] transcriptional coactivator YAP1 isoform  
X2 [Canis lupus dingo]. 84..98

MDPGPPPPAAPPQAQGGPPSAPPPPGQAPPSAPGPPAPPQSQAAPQAPPAGHQIVHVRGDSETDLEALFN  
AVMNPNTANVPQTVPMRLRKLKLPDSFFKPPPEPKAHSRQASTDAGTAGALTPQHVAHSSPASLQLGAVSPGTLTPT  
GVSSGPAAPSAQHLRQSSFEIPDDVPLPAGWEMAKTSSGQRYFLNHIDQTTTWQDPRKAMLSQMSVTAPTSPPV  
QQSMNTSASGPLPDGWEQAMTQDGEIYYINHKNKTTSWLDPRLDPRFAMNQRISQSAPVKQPPPLAPQSPPGVLG

GGSSQQQMRLLQQLQMEKERLRLKQELLRQAMRNISPSTANSPKCQELALRSQLPTLEQDGGTPNPVPSPGMS  
QELRTMTTSGSDPFLNSGTYHSRDESTDSGLSMSSYSVPRTPDDFLNSVDEMGTGDTINQSTLPSQQNRFPDYLE  
AIPGTNVDLGTLEGDGMNIEGEEELMPSLQEQALSSDILNDMESVLAATKLDKESFLTWL PMRLRKLPSFFKPP

rs:XP\_025321530 [XP\_025321530] transcriptional coactivator YAP1 isoform  
X3 [Canis lupus dingo]. 84..98

MDPGPPPPAAPPQAQGPSSAPPPPGQAPPSAPGPPAPPQAAAPQAPPAGHQIVHVRGDSETDLEALFN  
AVMNPKTANVPQTVPMRLRKLPSFFKPPPEPKAHSRQASTDAGTAGALTPQHVRHSSPASLQLGAVSPGTLTPT  
GVSSGPAAPSAQHLRQSSFEIPDDVPLPAGWEMAKTSSGQRYFLNHIDQTTTWQDPRKAMLSQMSVTAPTSPV  
QQSMMTSASGPLPDGWEQAMTQDGEIYYINHKNKTTSWLDRPLDRFAMNQRISQSAPVKQPPPLAPQSPPGVLG  
GGSSQQQMRLLQQLQMEKERLRLKQELLRQVRPQELALRSQLPTLEQDGGTPNPVPSPGMSQELRTMTTSGSD  
PFLNSGTYHSRDESTDSGLSMSSYSVPRTPDDFLNSVDEMGTGDTINQSTLPSQQNRFPDYLEAIPGTNVDLGT  
LEGDGMNIEGEEELMPSLQEQALSSDILNDMESVLAATKLDKESFLTWL PMRLRKLPSFFKPP

rs:XP\_025321531 [XP\_025321531] transcriptional coactivator YAP1 isoform  
X4 [Canis lupus dingo]. 84..98

MDPGPPPPAAPPQAQGPSSAPPPPGQAPPSAPGPPAPPQAAAPQAPPAGHQIVHVRGDSETDLEALFN  
AVMNPKTANVPQTVPMRLRKLPSFFKPPPEPKAHSRQASTDAGTAGALTPQHVRHSSPASLQLGAVSPGTLTPT  
GVSSGPAAPSAQHLRQSSFEIPDDVPLPAGWEMAKTSSGQRYFLNHIDQTTTWQDPRKAMLSQMSVTAPTSPV  
QQSMMTSASGPLPDGWEQAMTQDGEIYYINHKNKTTSWLDRPLDRFAMNQRISQSAPVKQPPPLAPQSPPGVLG  
GGSSQQQMRLLQQLQMEKERLRLKQELLRQELALRSQLPTLEQDGGTPNPVPSPGMSQELRTMTTSGSDPFLN  
SGTYHSRDESTDSGLSMSSYSVPRTPDDFLNSVDEMGTGDTINQSTLPSQQNRFPDYLEAIPGTNVDLGTLEGD  
GMNIEGEEELMPSLQEQALSSDILNDMESVLAATKLDKESFLTWL PMRLRKLPSFFKPP

rs:XP\_025321533 [XP\_025321533] transcriptional coactivator YAP1 isoform  
X5 [Canis lupus dingo]. 84..98

MDPGPPPPAAPPQAQGPSSAPPPPGQAPPSAPGPPAPPQAAAPQAPPAGHQIVHVRGDSETDLEALFN  
AVMNPKTANVPQTVPMRLRKLPSFFKPPPEPKAHSRQASTDAGTAGALTPQHVRHSSPASLQLGAVSPGTLTPT  
GVSSGPAAPSAQHLRQSSFEIPDDVPLPAGWEMAKTSSGQRYFLNHIDQTTTWQDPRKAMLSQMSVTAPTSPV  
QQSMMTSASAMNQRISQSAPVKQPPPLAPQSPPGVLGGSSQQQMRLLQQLQMEKERLRLKQELLRQVRPQAM  
RNISPSTANSPKCQELALRSQLPTLEQDGGTPNPVPSPGMSQELRTMTTSGSDPFLNSGTYHSRDESTDSGLSM  
SYSVPRTPDDFLNSVDEMGTGDTINQSTLPSQQNRFPDYLEAIPGTNVDLGTLEGDGMNIEGEEELMPSLQEQALSS  
DILNDMESVLAATKLDKESFLTWL PMRLRKLPSFFKPP

rs:XP\_025321534 [XP\_025321534] transcriptional coactivator YAP1 isoform  
X6 [Canis lupus dingo]. 84..98

MDPGPPPPAAPPQAQGPSSAPPPPGQAPPSAPGPPAPPQAAAPQAPPAGHQIVHVRGDSETDLEALFN  
AVMNPKTANVPQTVPMRLRKLPSFFKPPPEPKAHSRQASTDAGTAGALTPQHVRHSSPASLQLGAVSPGTLTPT  
GVSSGPAAPSAQHLRQSSFEIPDDVPLPAGWEMAKTSSGQRYFLNHIDQTTTWQDPRKAMLSQMSVTAPTSPV  
QQSMMTSASAMNQRISQSAPVKQPPPLAPQSPPGVLGGSSQQQMRLLQQLQMEKERLRLKQELLRQAMRNIS  
PSTANSPKCQELALRSQLPTLEQDGGTPNPVPSPGMSQELRTMTTSGSDPFLNSGTYHSRDESTDSGLSMSSYSV  
PRTPDDFLNSVDEMGTGDTINQSTLPSQQNRFPDYLEAIPGTNVDLGTLEGDGMNIEGEEELMPSLQEQALSSDILN  
DMESVLAATKLDKESFLTWL PMRLRKLPSFFKPP

rs:XP\_025321535 [XP\_025321535] transcriptional coactivator YAP1 isoform  
X7 [Canis lupus dingo]. 84..98

MDPGPPPPAAPPQAQGPSSAPPPPGQAPPSAPGPPAPPQAAAPQAPPAGHQIVHVRGDSETDLEALFN  
AVMNPKTANVPQTVPMRLRKLPSFFKPPPEPKAHSRQASTDAGTAGALTPQHVRHSSPASLQLGAVSPGTLTPT  
GVSSGPAAPSAQHLRQSSFEIPDDVPLPAGWEMAKTSSGQRYFLNHIDQTTTWQDPRKAMLSQMSVTAPTSPV  
QQSMMTSASAMNQRISQSAPVKQPPPLAPQSPPGVLGGSSQQQMRLLQQLQMEKERLRLKQELLRQVRPQEL  
ALRSQLPTLEQDGGTPNPVPSPGMSQELRTMTTSGSDPFLNSGTYHSRDESTDSGLSMSSYSVPRTPDDFLNSV  
DEMGTGDTINQSTLPSQQNRFPDYLEAIPGTNVDLGTLEGDGMNIEGEEELMPSLQEQALSSDILNDMESVLAATKLD  
KESFLTWL PMRLRKLPSFFKPP

rs:XP\_025321536 [XP\_025321536] transcriptional coactivator YAP1 isoform  
X8 [Canis lupus dingo]. 84..98

MDPGPPPPAAPPQAQGPSSAPPPPGQAPPSAPGPPAPPQAAAPQAPPAGHQIVHVRGDSETDLEALFN  
AVMNPKTANVPQTVPMRLRKLPSFFKPPPEPKAHSRQASTDAGTAGALTPQHVRHSSPASLQLGAVSPGTLTPT  
GVSSGPAAPSAQHLRQSSFEIPDDVPLPAGWEMAKTSSGQRYFLNHIDQTTTWQDPRKAMLSQMSVTAPTSPV

QQSMMTSASAMNQRI SQSAPVKQPPPLAPQSPPGVLGGGGSSQQQQMRLQQLQMEKERLRLKQOELLRQELALRS  
QLPTLEQDGGT PNPVPSPGMSQELRTMTTSGSDPFLNSGTYHSRDESTDSGLSMSSYSVPRTPDDFLNSVDEMDT  
GDTINQSTLPSQQNRFPDYLEAIPGTNVDLGTLEGDGMNIEGEEELMPSLQEQALSSDILNDMESVLAATKLDKESF  
LTWL PMRLRKLKLPDSFFKPP

rs:XP\_025275284 [XP\_025275284] protein **FAM181B** [Canis lupus dingo].  
221..235

MAVQAALLSTHPFVFPFGGGSPDALGGAFGALDKGCCFEDDEPGPPAGALLAGAEGGDVREATRDLLSF  
MDSASSNIKLALDKPGKSKRKNVHRKYLQKQIKRCSGLMGAAPPGPSGAADAPAKRPLGAAGAQAQAVAGPPPGK  
AAPREASQAAAANSLQSRSLAALFDSLHRVPAGDERPGASGAAPAAALGAAGAGGSGGDAAGPAGGTAGPGARK  
VPLRARNLPPSFFTEPSRAGGGCGPSGPGVSLGDLEKGADAVEFLELLAPDYGAGAGAGAGAGAGAGAGAVLLA  
AEPLEVFPAAGAVLRGPELEPGLFEPPAATVGALLYPEPWSAPGCPPAKRPPPAAPRGGALALTEPLRPAYPAAA  
DCPGGEDAPGLLASFAFFSDCALPPPPPPPHQVSYEYGAGYGRSAYAGLWRPDAAWEGAPGEEGAPRD  
PLRARNLPPSFFTEP

rs:XP\_019839553 [XP\_019839553] PREDICTED: protein **FAM181A** isoform X1 [Bos  
indicus]. 252..266

MVPMVTICDGKECGNGAAACLGCFVSGEALPDWPEGPPAPGTRRPPFSPLEGGTTASSRTELAGRAK  
GPGQLQHGGNLCRATLAGARAPALSVGSVLFPGAASCLNPASSWKARCSGALVMASDSVLMKLLNFVNLAASDIK  
AALDKSAPCRRSVDHRKYLQKQLKRFSQKYSRLPRGLPGRXAEPHLKRGPEDRPGRPLPLESGHGSSPGGGGCK  
EKALGNLDREESLSKERTLHGPDGATKPGQVPMRKRQLPASFWEEP RPPTHSYVGLGGLGPREGPPYEGKKHC  
KGLEPLGPETTPVPTS PRAPAEKEPLKMPGVSLVGRVSAWCCPFQYHGQPVYPSPPGALPQSPMPSLGLWRKSA  
ASPGELAHFCKDAEGPGQKVYRPVVLKPIPTKPAVPPPIFNVFGYL PMRKRQLPASFWEEP

rs:XP\_019839554 [XP\_019839554] PREDICTED: protein **FAM181A** isoform X2 [Bos  
indicus]. 130..144

MASDSVLMKLLNFVNLAASDIKAALDKSAPCRRSVDHRKYLQKQLKRFSQKYSRLPRGLPGRXAEPHLK  
RGPEDRPGRPLPLESGHGSSPGGGGCKEKALGNLDREESLSKERTLHGPDGATKPGQVPMRKRQLPASFWEEP  
RPPTHSYVGLGGLGPREGPPYEGKKHC KGLEPLGPETTPVPTS PRAPAEKEPLKMPGVSLVGRVSAWCCPFQY  
HGQPVYPSPPGALPQSPMPSLGLWRKSAASPGELAHFCKDAEGPGQKVYRPVVLKPIPTKPAVPPPIFNVFGYL  
PMRKRQLPASFWEEP

rs:XP\_019873447 [XP\_019873447] PREDICTED: transcriptional coactivator  
YAP1-A isoform X1 [Aethina tumida]. 41..55

MALNQDEDKPVLRVDQDSETDLQALFDSVLKPNKRPLQVPWMSMRNMPDSFFNPPSTGSKSINHSRENS  
VDSAFGSGAANSASVNSVPLQTAHHRHSSPASLQQTYAVGQQQTPTHHHIKQRSYDVATKTEDDTPLPHGWEQA  
RTPEGQVYYLNHTTRTTTWEDPRKSLAAQAAAAQHQAHEHLLSSQTSHPSPSTSTSAKLTTDVLGPLEGWEQAQ  
TPEGEIYFINHQTRTTSWFDPRIPQHLQQRSPSNLVGSTWHSPLSQSPAKAQQARLHQLQLEREKLRQRQOEIRR  
QELIRSSSPMDPYISNYTDHSRQESGDSGLGMGNFSLPHTPEDYLSNIDNMDVASETHMTDPDISTLSDNIDS  
TDDLVP TLGLDEEFPILEEVSQSLINTPTTRPDNVL IWL PWSMRNMPDSFFNPP

rs:XP\_019873448 [XP\_019873448] PREDICTED: WW domain-containing  
transcription regulator protein 1 isoform X2 [Aethina tumida]. 41..55

MALNQDEDKPVLRVDQDSETDLQALFDSVLKPNKRPLQVPWMSMRNMPDSFFNPPSTGSKSINHSRENS  
VDSAFGSGAANSASVNSVPLQTAHHRHSSPASLQQTYAVGQQQTPTHHHIKQRSYDVATKTEDDTPLPHGWEQA  
RTPEGQVYYLNHTTRTTTWEDPRKSLAAQAAAAQHQAHEHLLSSQTSHPSPSTSTSQHLQQRSPSNLVGSTWHSPL  
SQSPAKAQQARLHQLQLEREKLRQRQOEIRRQELIRSSSPMDPYISNYTDHSRQESGDSGLGMGNFSLPHTPEDY  
LSNIDNMDVASETHMTDPDISTLSDNIDSTDDLVP TLGLDEEFPILEEVSQSLINTPTTRPDNVL IWL  
PWSMRNMPDSFFNPP

rs:XP\_019525794 [XP\_019525794] PREDICTED: transcriptional coactivator  
yorkie-like isoform X1 [Aedes albopictus]. 59..73

MAFNPGSPGNSSATSNTSEENDGARKKENLILLVAKDSNDKLNELFDKTLNRLPLQIPLMRKLPDSF  
FKPPSSGSKSPSVSHSRENSADSAFGSGTTILGGVTTGPNGLPIHHSRAHSSPASLGKIPAGLVA SINAANAQQ  
AANNSSNVNSNKTQQPGSVNGGGASSGGDSSAAA AVQQQQQAQQQAAQQQSLTRQAILHSRGRSYDVSNQHAVY  
GDLPPGWEQAKTQDRIYYLNHNTRTTTWEDPRITAA MQQESL FQQQQQSSVETLFNTG SQTLLSPTISSPTPTN  
NVVFSDSIEMSNDLPAPAPAAPSNVSMNLSSQNSNNNNNNQANPNNSNNNVGPLPDGWEEGITAKGERYYINHAT  
RTTTWRDPRLSNQDWA AQEQSVRLYNLQLERERLRRRQQEIRSHIGEDPFLSGLTDHSRQESGDSGLSESSTSQS

MPHTPDFLSSIDDSMDGLSMADNTMDTIAFGDNLETPDEFMLDDPILLEKIDAVSNLNLIDPSSTKPDNTLYDII  
PLMRKLPDSFFKPP

rs:XP\_019525803 [XP\_019525803] PREDICTED: transcriptional coactivator  
yorkie-like isoform X2 [Aedes albopictus]. 59..73

MAFNGSPGNSSATSNTSEENDGARKKENLILLVAKDSNDKLNELFDKTLNRLPLQIPLMRKLPDSF  
FKPPSSGSKSPSVSHSRENSADSAFGSGTTILGGVTTGPNGLPIHHSRAHSSPASLGKIPAGLVASINAANAQQ  
AANSSNVNSNKTQQPGSVNGGGASSGGDGSSAAAQVQQQQAQQQAAQQQSLTRQAILHSRGRSYDVSNQHAVY  
GDLPPGWEQAKTQDGRYIYLNHNTRTTTTWEDPRITAAMQQESLFQQQQQSSVETLFNTGSQTLLSPTISSPTPTN  
NANQDWAAQEQSVRLYNLQLERERLRRRQQEIRSHIGEDPFLSGLTDHSRQESGDSGLSESSTSQSMPTPDFLS  
SIDDSMDGLSMADNTMDTIAFGDNLETPDEFMLDDPILLEKIDAVSNLNLIDPSSTKPDNTLYDII  
PLMRKLPDSFFKPP

rs:XP\_019548748 [XP\_019548748] PREDICTED: transcriptional coactivator  
yorkie-like isoform X1 [Aedes albopictus]. 59..73

MAFNGSPGNSSATSNTSEENDGARKKENLILLVAKDSNDKLNELFDKTLNRLPLQIPLMRKLPDSF  
FKPPSSGSKSPSVSHSRENSADSAFGSGTTILGGVTTGPNGLPIHHSRAHSSPASLGKIPAGLVASINAANAQQ  
VANSSNVNSNKTQQPGSVNGGGASSGGDGSSAAAQVQQQQAQQQAAQQQSLTRQAILHSRGRSYDVSNQHAVY  
GDLPPGWEQAKTQDGRYIYLNHNTRTTTTWEDPRITAAMQQESLFQQQQQSSVETLFNTGSQTLLSPTISSPTPTN  
NVVFSDSIEMSNLPPAPAPASNVSMLNSSQNSNNNNNNNNQANPNNSNNNVGFLPDGWEEGITAKGERYYINH  
ATRTTTTWRDPRLSNQDWAAQEQSVRLYNLQLERERLRRRQQEIRSHIGEDPFLSGLTDHSRQESGDSGLSESSTS  
QSMPTPDFLSSIDDSMDGLSMADNTMDTIAFGDNLETPDEFMLDDPILLEKIDAVSNLNLIDPSSTKPDNTLYD  
II PLMRKLPDSFFKPP

rs:XP\_019548749 [XP\_019548749] PREDICTED: transcriptional coactivator  
yorkie-like isoform X2 [Aedes albopictus]. 59..73

MAFNGSPGNSSATSNTSEENDGARKKENLILLVAKDSNDKLNELFDKTLNRLPLQIPLMRKLPDSF  
FKPPSSGSKSPSVSHSRENSADSAFGSGTTILGGVTTGPNGLPIHHSRAHSSPASLGKIPAGLVASINAANAQQ  
VANSSNVNSNKTQQPGSVNGGGASSGGDGSSAAAQVQQQQAQQQAAQQQSLTRQAILHSRGRSYDVSNQHAVY  
GDLPPGWEQAKTQDGRYIYLNHNTRTTTTWEDPRITAAMQQESLFQQQQQSSVETLFNTGSQTLLSPTISSPTPTN  
NANQDWAAQEQSVRLYNLQLERERLRRRQQEIRSHIGEDPFLSGLTDHSRQESGDSGLSESSTSQSMPTPDFLS  
SIDDSMDGLSMADNTMDTIAFGDNLETPDEFMLDDPILLEKIDAVSNLNLIDPSSTKPDNTLYDII  
PLMRKLPDSFFKPP

rs:XP\_020023398 [XP\_020023398] transcriptional coactivator YAP1 isoform  
X1 [Castor canadensis]. 85..99

MDPGQQPPPQPAPQGGPPAQTTPQAQGGPPSGPGQPAPPAAQAAPQAPPAGHQIVHVRGDSETDLEALF  
NAVMPKNTANVPQTPMRLRKLKLPDSFFKPPPEPKSHSRQASTDAGTAGALTPQHVRHSSPASLQLGAVSPGTLTP  
AGGVSGPAATPTAQHLRQPSFEIPDDVPLPAGWEMAKTSSGQRYFLNHIDQTTTWQDPRKAMLSQMNVTAPTSP  
VPQNMMSASGPLPDGWEQAMTQDGEIYYINHKNKTTSWLDPRLDSRFAMNQRISQSAPVKQPPMAPQSPQGGV  
MGGGNSQQQMRLLQQLQMEKERLRLKQOELLRQAMRNINPSTANSPKCQELALRSQLPTLEPDGGTQNPVSSPGM  
SQELRTMTTSSDPFLNSGTYHSRDESTDSGLSMSSYSVPRTPDDFLNSVDEMDTGDTINQSTLPSQQNRFPDYL  
EAIPTGNVDLGTLEGDGMNIEGEEELMPSLQEQALSSDILNDMESVLAATKLDKESFLTWL  
PMRLRKLKLPDSFFKPP

rs:XP\_020023399 [XP\_020023399] transcriptional coactivator YAP1 isoform  
X2 [Castor canadensis]. 85..99

MDPGQQPPPQPAPQGGPPAQTTPQAQGGPPSGPGQPAPPAAQAAPQAPPAGHQIVHVRGDSETDLEALF  
NAVMPKNTANVPQTPMRLRKLKLPDSFFKPPPEPKSHSRQASTDAGTAGALTPQHVRHSSPASLQLGAVSPGTLTP  
AGGVSGPAATPTAQHLRQPSFEIPDDVPLPAGWEMAKTSSGQRYFLNHIDQTTTWQDPRKAMLSQMNVTAPTSP  
VPQNMMSASGPLPDGWEQAMTQDGEIYYINHKNKTTSWLDPRLDSRFKAMNQRISQSAPVKQPPMAPQSPQGG  
GVMGGGNSQQQMRLLQQLQMEKERLRLKQOELLRQAMRNINPSTANSPKCQELALRSQLPTLEPDGGTQNPVSSP  
GMSQELRTMTTSSDPFLNSGTYHSRDESTDSGLSMSSYSVPRTPDDFLNSVDEMDTGDTINQSTLPSQQNRFPD  
YLEAIPTGNVDLGTLEGDGMNIEGEEELMPSLQEQALSSDILNDMESVLAATKLDKESFLTWL  
PMRLRKLKLPDSFFKPP

rs:XP\_020023400 [XP\_020023400] transcriptional coactivator YAP1 isoform  
X3 [Castor canadensis]. 85..99

MDPGQQPPPQPAPQGGPPAQTTPQAQGGPPSGPGQPAPPAAQAAPQAPPAGHQIVHVRGDSETDLEALF

NAVMNPKTANVPQTVPMRLRKLKLPDSFFKPPPEPKSHSRQASTDAGTAGALTPQHVRHSSPASLQLGAVSPGTLTP  
AGGVSGPAATPTAQHLRQPSFEIPDDVPLPAGWEMAKTSSGQRYFLNHIDQTTTWQDPRKAMLSQMNVTAPTSPP  
VPQNMNNSASGPLPDGWEQAMTQDGEIYYINHKNKTTSWLDPRLDSRFKAMNQRISQSAPVKQPPMAPQSPQG  
GVMGGGNSQQQMRLLQQLQMEKERLRLKQQELLRQVRPQELALRSQLPTLEPDGGTQNPVSSPGMSQELRTMTTN  
SSDPFLNSGTYHSRDESTDSGLSMSSYSVPRTPDFFLNSVDEMDTGDTINQSTLPSQQNRFPDYLEAIPGTNVDL  
GTLEGDGMNIEGELMPSLQEQALSSDILNDMESVLAATKLDKESFLTWL PMRLRKLKLPDSFFKPP

rs:XP\_020023401 [XP\_020023401] transcriptional coactivator YAP1 isoform  
X4 [Castor canadensis]. 85..99

MDPGQQPPPQPAPQGGPQPPAQTPQAQGGPPSGPGQPAPPAAQAAPQAPPAGHQIVHVRGDSETDLEALF  
NAVMNPKTANVPQTVPMRLRKLKLPDSFFKPPPEPKSHSRQASTDAGTAGALTPQHVRHSSPASLQLGAVSPGTLTP  
AGGVSGPAATPTAQHLRQPSFEIPDDVPLPAGWEMAKTSSGQRYFLNHIDQTTTWQDPRKAMLSQMNVTAPTSPP  
VPQNMNNSASGPLPDGWEQAMTQDGEIYYINHKNKTTSWLDPRLDSRFAMNQRISQSAPVKQPPMAPQSPQGGV  
MGGGNSQQQMRLLQQLQMEKERLRLKQQELLRQVRPQELALRSQLPTLEPDGGTQNPVSSPGMSQELRTMTTNSS  
DPFLNSGTYHSRDESTDSGLSMSSYSVPRTPDFFLNSVDEMDTGDTINQSTLPSQQNRFPDYLEAIPGTNVDLGT  
LEGDGMNIEGELMPSLQEQALSSDILNDMESVLAATKLDKESFLTWL PMRLRKLKLPDSFFKPP

rs:XP\_020023402 [XP\_020023402] transcriptional coactivator YAP1 isoform  
X5 [Castor canadensis]. 85..99

MDPGQQPPPQPAPQGGPQPPAQTPQAQGGPPSGPGQPAPPAAQAAPQAPPAGHQIVHVRGDSETDLEALF  
NAVMNPKTANVPQTVPMRLRKLKLPDSFFKPPPEPKSHSRQASTDAGTAGALTPQHVRHSSPASLQLGAVSPGTLTP  
AGGVSGPAATPTAQHLRQPSFEIPDDVPLPAGWEMAKTSSGQRYFLNHIDQTTTWQDPRKAMLSQMNVTAPTSPP  
VPQNMNNSASGPLPDGWEQAMTQDGEIYYINHKNKTTSWLDPRLDSRFKAMNQRISQSAPVKQPPMAPQSPQG  
GVMGGGNSQQQMRLLQQLQMEKERLRLKQQELLRQELALRSQLPTLEPDGGTQNPVSSPGMSQELRTMTTNSSDP  
FLNSGTYHSRDESTDSGLSMSSYSVPRTPDFFLNSVDEMDTGDTINQSTLPSQQNRFPDYLEAIPGTNVDLGTLE  
GDGMNIEGELMPSLQEQALSSDILNDMESVLAATKLDKESFLTWL PMRLRKLKLPDSFFKPP

rs:XP\_020023403 [XP\_020023403] transcriptional coactivator YAP1 isoform  
X6 [Castor canadensis]. 85..99

MDPGQQPPPQPAPQGGPQPPAQTPQAQGGPPSGPGQPAPPAAQAAPQAPPAGHQIVHVRGDSETDLEALF  
NAVMNPKTANVPQTVPMRLRKLKLPDSFFKPPPEPKSHSRQASTDAGTAGALTPQHVRHSSPASLQLGAVSPGTLTP  
AGGVSGPAATPTAQHLRQPSFEIPDDVPLPAGWEMAKTSSGQRYFLNHIDQTTTWQDPRKAMLSQMNVTAPTSPP  
VPQNMNNSASGPLPDGWEQAMTQDGEIYYINHKNKTTSWLDPRLDSRFAMNQRISQSAPVKQPPMAPQSPQGGV  
MGGGNSQQQMRLLQQLQMEKERLRLKQQELLRQELALRSQLPTLEPDGGTQNPVSSPGMSQELRTMTTNSSDPFL  
NSGTYHSRDESTDSGLSMSSYSVPRTPDFFLNSVDEMDTGDTINQSTLPSQQNRFPDYLEAIPGTNVDLGTLEGD  
GMNIEGELMPSLQEQALSSDILNDMESVLAATKLDKESFLTWL PMRLRKLKLPDSFFKPP

rs:XP\_020023404 [XP\_020023404] transcriptional coactivator YAP1 isoform  
X7 [Castor canadensis]. 85..99

MDPGQQPPPQPAPQGGPQPPAQTPQAQGGPPSGPGQPAPPAAQAAPQAPPAGHQIVHVRGDSETDLEALF  
NAVMNPKTANVPQTVPMRLRKLKLPDSFFKPPPEPKSHSRQASTDAGTAGALTPQHVRHSSPASLQLGAVSPGTLTP  
AGGVSGPAATPTAQHLRQPSFEIPDDVPLPAGWEMAKTSSGQRYFLNHIDQTTTWQDPRKAMLSQMNVTAPTSPP  
VPQNMNNSASAMNQRISQSAPVKQPPMAPQSPQGGVVMGGGNSQQQMRLLQQLQMEKERLRLKQQELLRQAMRNI  
NPSTANSPKCQELALRSQLPTLEPDGGTQNPVSSPGMSQELRTMTTNSSDPFLNSGTYHSRDESTDSGLSMSSYS  
VPRTPDFFLNSVDEMDTGDTINQSTLPSQQNRFPDYLEAIPGTNVDLGTLEGDGMNIEGELMPSLQEQALSSDIL  
NDMESVLAATKLDKESFLTWL PMRLRKLKLPDSFFKPP

rs:XP\_020023405 [XP\_020023405] transcriptional coactivator YAP1 isoform  
X8 [Castor canadensis]. 85..99

MDPGQQPPPQPAPQGGPQPPAQTPQAQGGPPSGPGQPAPPAAQAAPQAPPAGHQIVHVRGDSETDLEALF  
NAVMNPKTANVPQTVPMRLRKLKLPDSFFKPPPEPKSHSRQASTDAGTAGALTPQHVRHSSPASLQLGAVSPGTLTP  
AGGVSGPAATPTAQHLRQPSFEIPDDVPLPAGWEMAKTSSGQRYFLNHIDQTTTWQDPRKAMLSQMNVTAPTSPP  
VPQNMNNSASAMNQRISQSAPVKQPPMAPQSPQGGVVMGGGNSQQQMRLLQQLQMEKERLRLKQQELLRQVRPQ  
LALRSQLPTLEPDGGTQNPVSSPGMSQELRTMTTNSSDPFLNSGTYHSRDESTDSGLSMSSYSVPRTPDFFLNSV  
DEMDTGDTINQSTLPSQQNRFPDYLEAIPGTNVDLGTLEGDGMNIEGELMPSLQEQALSSDILNDMESVLAATK  
DKESFLTWL PMRLRKLKLPDSFFKPP

rs:XP\_020023406 [XP\_020023406] transcriptional coactivator YAP1 isoform  
X9 [Castor canadensis]. 85..99



MDPGQQPPQPAPQGGQPPAQTPOAGQPPSGPGQPAPPAAQAAPQAPPAGHQIVHVRGDSETDLEALF  
NAVMPKNTANVPQTVPMRLRKLKLPDSFFKPPPEPKSHSRQASTDAGTAGALTPQHVRHSSPASLQLGAVSPGTLTP  
AGGVSGPAATPTAQHLRQPSFEIPDDVPLPAGWEMAKTSSGQRYFLNHIDQTTTWQDPRKAMLSQMNVTAPTSP  
VPQNMMSASAMNQRISSAPVKQPPPMAPQSPQGGVMGGGSSQQQMRLQQLQMEKERLRLKQQLLRLQELALR  
SQLPTLEPDGGTQNPVSSPGMSQELRTMTTNSSDPFLNSGTYHSRDESTDSGLSMSSYSVPRTPDFFLNSVDEMD  
TGDTINQSTLPSQQNRFPDYLEAIPGTNVDLGTLEGDGMNIEGEELMPSLQEQALSSDILNDMESVLAATKLDKES  
FLTWL PMRLRKLKLPDSFFKPP

rs:XP\_006133734 [XP\_006133734] protein **FAM181A** [Pelodiscus  
sinensis].>rs:XP\_006133735 [XP\_006133735] protein **FAM181A** [Pelodiscus  
sinensis].>tr:K7EYK0\_PELSI [K7EYK0] SubName: Full=Family with sequence  
similarity 181 member A {ECO:0000313|Ensembl:ENSPSIP00000000860};  
126..140

MASDSEVKTLNLFVNLASSDIKAALDKSAPCRRSVDHRKYLQKQLKRFSQKYSRIIPRCPTSKSIESSSK  
RGTDDRNRSSNPDLDPNHRVSSSEKALRLSEVEENFSGEQVLQEQSPESIRPDQVPMRKRQLPASFWEEPRTQ  
SLLVGSFPAGLDGLPNRDLPPYKGGKSKKGPDTTEPGTPPLPAQPRGEKEPIKVPGTSLSGRMNAWCCPFQYH  
GQPVYQTHGALPQSPFPLGLWRKSTAPAGEIQHFCKEAGSMGQKLYRPVVLKPIPTKPAVPPPIFNVFGYI  
PMRKRQLPASFWEEP

rs:XP\_014381795 [XP\_014381795] uncharacterized protein LOC106723032  
[Alligator sinensis].>rs:XP\_014381796 [XP\_014381796] uncharacterized  
protein LOC106723032 [Alligator sinensis].>tr:A0A1U8DX22\_ALLSI [A0A1U8DX22]  
SubName: Full=uncharacterized protein LOC106723032  
{ECO:0000313|RefSeq:XP\_014381795.1, ECO:0000313|RefSeq:XP\_014381796.1};  
214..228

MAAGVIRNPAEFRLPSSFQHSFLHPAVHQDRDFQELSEEEEEEEEEEEEEEEEEEMEEVESQGSPTAPIPGG  
ERQEVATATASLHDAEMTLQLLRFSELISSDIQRYFGRKDKEDPDSCNIYEDCFSPQSRGRELlyADLMHIAQSG  
ELDDEDSHSAQVPLGQLDQVWRSICNKDGGQKLGPLAELFEYGLRQYIKQTVSDSRRLRLEKKYAHIIPMHRK  
LPPSFWKEPSPGPASILNTNTPDFSDLLANWTVEPGQELPNASRELAGELGQAMEADQFNVL  
PMHRRKLPPSFWKEP

rs:XP\_012591562 [XP\_012591562] protein **FAM181B** [Microcebus murinus].  
221..235

MAVQAALLSTHPFVVFPGFGGAPDGLGGAFGALDKGCCFEDDETGAAPAGALLSGAQGGDVREATRDLLSF  
IDSASSNIKLALDKPGKSKRKNVHRKYLQKQIKRCSGLMGAAAPGPPSPSAADTPAKRPPVAPSAPTAVPAQK  
AAPREASQAAAAASLQSRSLAALFDSLRLHLPGGAEPAGAAVAAPAAGLGGAGAGGSGGDGAGPSGGTAVPGARK  
VPLRARNLPPSFFTEPSRAGGGCSPSGPGVCLGDLEKGAEEVFFELLGPDYSAGTEAAVLLAAEPLDVFPAGA  
AVLRGPPPELEPSFFEPVAVGNLLYPEPWSVPGCPATKKKPRGGLTLNEPLRPLYPAAADSPGGEDGPGHLASF  
APFFPDCALPPPPPHQVSYDYGAGYSRTAYSSLWRPDGVWEGPPGEEGAPRDPLRARNLPPSFFTEP

rs:XP\_012625980 [XP\_012625980] transcriptional coactivator YAP1 isoform  
X1 [Microcebus murinus]. 85..99

MDPGQQPPQPAPQGGQPPAQTPOAGQPPSGPGQPAPPASQAAPQAPPAGHQIVHVRGDSETDLEALF  
NAVMPKNTANVPQTVPMRLRKLKLPDSFFKPPPEPKSHSRQASTDAGTAGALTPQHVRHSSPASLQLGAVSPGTLNP  
TGVSVPAAATPAAQHLRQSSFEIPDDVPLPAGWEMAKTSSGQRYFLNHIDQTTTWQDPRKAMLSQMNVTAPTSP  
VQQNMMSASGPLPDGWEQAMTQDGEIYYINHKNKTTSWLDPRLDPRFGKAMNQRISSAPVKQPPPLAPQSPQG  
GVMGGGSSNQQQMRLQQLQMEKERLRLKQQLLRLQVVRPQAMRNINPSTANSKPCQELALRSQQLPTLEQDGGTQN  
AVSSPGMSQELRTMTTNSSDPFLNSGTYHSRDESTDSGLSMSSYSVPRTPDFFLNSVDEMDTGDTINQSTLPSQQ  
NRFPDYLEAIPGTNVDLGTLEGDGMNIEGEELMPSLQEQALSSDILNDMESVLAATKLDKESFLTWL  
PMRLRKLKLPDSFFKPP

rs:XP\_012625981 [XP\_012625981] transcriptional coactivator YAP1 isoform  
X2 [Microcebus murinus]. 85..99

MDPGQQPPQPAPQGGQPPAQTPOAGQPPSGPGQPAPPASQAAPQAPPAGHQIVHVRGDSETDLEALF  
NAVMPKNTANVPQTVPMRLRKLKLPDSFFKPPPEPKSHSRQASTDAGTAGALTPQHVRHSSPASLQLGAVSPGTLNP  
TGVSVPAAATPAAQHLRQSSFEIPDDVPLPAGWEMAKTSSGQRYFLNHIDQTTTWQDPRKAMLSQMNVTAPTSP  
VQQNMMSASGPLPDGWEQAMTQDGEIYYINHKNKTTSWLDPRLDPRFAMNQRISSAPVKQPPPLAPQSPQGGV  
MGGGSSNQQQMRLQQLQMEKERLRLKQQLLRLQVVRPQAMRNINPSTANSKPCQELALRSQQLPTLEQDGGTQNAV  
SSPGMSQELRTMTTNSSDPFLNSGTYHSRDESTDSGLSMSSYSVPRTPDFFLNSVDEMDTGDTINQSTLPSQQNR

FPDYLEAIPGTNVDLGTLEGDGMNIEGEELMPSLQEQALSSDILNDMESVLAATKLDKESFLTWL  
PMRLRKLKLPDSFFKPP

rs:XP\_012625982 [XP\_012625982] transcriptional coactivator YAP1 isoform  
X3 [Microcebus murinus]. 85..99

MDPGQQQPPQPAPQGQGGQPPAQTPOGQGGPPSGPGQPAPPASQAAPQAPPAGHQIVHVRGDSETDLEALF  
NAVMNPKTANVPQTVPMRLRKLKLPDSFFKPPPEPKSHSRQASTDAGTAGALTPQHVRHSSPASLQLGAVSPGTLNP  
TGVVSGPAATPAAQHLRQSSFEIPDDVPLPAGWEMAKTSSGQRYFLNHIDQTTTWQDPRKAMLSQMNVTAPTSPP  
VQQNMMNSASGPLPDGWEQAMTQDGEIYYINHKNKTTSWLDPRLDPRFGKAMNQRISQSAPVKQPPPLAPQSPQG  
GVMGGGSSNQQQMRLQQLQMEKERLRLKQOELLRQAMRNINPSTANSKPCQELALRSQLPTLEQDGGTQNAVSS  
PGMSQELRTMTTNSSDPFLNSGTYHSRDESTDSGLSMSSYSVPRTPDDFLNSVDEMDTGDTINQSTLPSQQNRFPD  
DYLEAIPGTNVDLGTLEGDGMNIEGEELMPSLQEQALSSDILNDMESVLAATKLDKESFLTWL  
PMRLRKLKLPDSFFKPP

rs:XP\_012625983 [XP\_012625983] transcriptional coactivator YAP1 isoform  
X4 [Microcebus murinus]. 85..99

MDPGQQQPPQPAPQGQGGQPPAQTPOGQGGPPSGPGQPAPPASQAAPQAPPAGHQIVHVRGDSETDLEALF  
NAVMNPKTANVPQTVPMRLRKLKLPDSFFKPPPEPKSHSRQASTDAGTAGALTPQHVRHSSPASLQLGAVSPGTLNP  
TGVVSGPAATPAAQHLRQSSFEIPDDVPLPAGWEMAKTSSGQRYFLNHIDQTTTWQDPRKAMLSQMNVTAPTSPP  
VQQNMMNSASGPLPDGWEQAMTQDGEIYYINHKNKTTSWLDPRLDPRFAMNQRISQSAPVKQPPPLAPQSPQGGV  
MGGGSSNQQQMRLQQLQMEKERLRLKQOELLRQAMRNINPSTANSKPCQELALRSQLPTLEQDGGTQNAVSSPG  
MSQELRTMTTNSSDPFLNSGTYHSRDESTDSGLSMSSYSVPRTPDDFLNSVDEMDTGDTINQSTLPSQQNRFPDY  
LEAIPGTNVDLGTLEGDGMNIEGEELMPSLQEQALSSDILNDMESVLAATKLDKESFLTWL  
PMRLRKLKLPDSFFKPP

rs:XP\_012625985 [XP\_012625985] transcriptional coactivator YAP1 isoform  
X5 [Microcebus murinus]. 85..99

MDPGQQQPPQPAPQGQGGQPPAQTPOGQGGPPSGPGQPAPPASQAAPQAPPAGHQIVHVRGDSETDLEALF  
NAVMNPKTANVPQTVPMRLRKLKLPDSFFKPPPEPKSHSRQASTDAGTAGALTPQHVRHSSPASLQLGAVSPGTLNP  
TGVVSGPAATPAAQHLRQSSFEIPDDVPLPAGWEMAKTSSGQRYFLNHIDQTTTWQDPRKAMLSQMNVTAPTSPP  
VQQNMMNSASGPLPDGWEQAMTQDGEIYYINHKNKTTSWLDPRLDPRFGKAMNQRISQSAPVKQPPPLAPQSPQG  
GVMGGGSSNQQQMRLQQLQMEKERLRLKQOELLRQVRPQELALRSQLPTLEQDGGTQNAVSSPGMSQELRTMTT  
NSSDPFLNSGTYHSRDESTDSGLSMSSYSVPRTPDDFLNSVDEMDTGDTINQSTLPSQQNRFPDYLEAIPGTNVD  
LGTLEGDGMNIEGEELMPSLQEQALSSDILNDMESVLAATKLDKESFLTWL PMRLRKLKLPDSFFKPP

rs:XP\_012625986 [XP\_012625986] transcriptional coactivator YAP1 isoform  
X6 [Microcebus murinus]. 85..99

MDPGQQQPPQPAPQGQGGQPPAQTPOGQGGPPSGPGQPAPPASQAAPQAPPAGHQIVHVRGDSETDLEALF  
NAVMNPKTANVPQTVPMRLRKLKLPDSFFKPPPEPKSHSRQASTDAGTAGALTPQHVRHSSPASLQLGAVSPGTLNP  
TGVVSGPAATPAAQHLRQSSFEIPDDVPLPAGWEMAKTSSGQRYFLNHIDQTTTWQDPRKAMLSQMNVTAPTSPP  
VQQNMMNSASGPLPDGWEQAMTQDGEIYYINHKNKTTSWLDPRLDPRFAMNQRISQSAPVKQPPPLAPQSPQGGV  
MGGGSSNQQQMRLQQLQMEKERLRLKQOELLRQVRPQELALRSQLPTLEQDGGTQNAVSSPGMSQELRTMTTNS  
SDPFLNSGTYHSRDESTDSGLSMSSYSVPRTPDDFLNSVDEMDTGDTINQSTLPSQQNRFPDYLEAIPGTNVDL  
GTLEGDGMNIEGEELMPSLQEQALSSDILNDMESVLAATKLDKESFLTWL PMRLRKLKLPDSFFKPP

rs:XP\_012625987 [XP\_012625987] transcriptional coactivator YAP1 isoform  
X7 [Microcebus murinus]. 85..99

MDPGQQQPPQPAPQGQGGQPPAQTPOGQGGPPSGPGQPAPPASQAAPQAPPAGHQIVHVRGDSETDLEALF  
NAVMNPKTANVPQTVPMRLRKLKLPDSFFKPPPEPKSHSRQASTDAGTAGALTPQHVRHSSPASLQLGAVSPGTLNP  
TGVVSGPAATPAAQHLRQSSFEIPDDVPLPAGWEMAKTSSGQRYFLNHIDQTTTWQDPRKAMLSQMNVTAPTSPP  
VQQNMMNSASGPLPDGWEQAMTQDGEIYYINHKNKTTSWLDPRLDPRFGKAMNQRISQSAPVKQPPPLAPQSPQG  
GVMGGGSSNQQQMRLQQLQMEKERLRLKQOELLRQELALRSQLPTLEQDGGTQNAVSSPGMSQELRTMTTNS  
SDPFLNSGTYHSRDESTDSGLSMSSYSVPRTPDDFLNSVDEMDTGDTINQSTLPSQQNRFPDYLEAIPGTNVDL  
GTLEGDGMNIEGEELMPSLQEQALSSDILNDMESVLAATKLDKESFLTWL PMRLRKLKLPDSFFKPP

rs:XP\_012625988 [XP\_012625988] transcriptional coactivator YAP1 isoform  
X8 [Microcebus murinus]. 85..99

MDPGQQQPPQPAPQGQGGQPPAQTPOGQGGPPSGPGQPAPPASQAAPQAPPAGHQIVHVRGDSETDLEALF  
NAVMNPKTANVPQTVPMRLRKLKLPDSFFKPPPEPKSHSRQASTDAGTAGALTPQHVRHSSPASLQLGAVSPGTLNP

TGVVSGPAATPAAQHLRQSSFEIPDDVPLPAGWEMAKTSSGQRYFLNHIDQTTTQWQDPRKAMLSQMNVTAPTSPP  
VQQNMMNSASGPLPDGWEQAMTQDGEIYYINHKNKTTSWLDPRLDPRFAMNQRIQSAPVKQPPPLAPQSPQGGV  
MGGGSSNQQQMRLQQLQMEKERLRLKQQELLRQELALRSQLPTLEQDGGTQNAVSSPGMSQELRTMTTNSSDPF  
LNSGTYHSRDESTDSGLSMSSYSVPRTPDDFLNSVDEMMDTGDITINQSTLPSQQNRFPDYLEAIPGTNVDLGTLEG  
DGMNIEGEEELMPSLQEQALSSDILNDMESVLAATKLDKESFLTWL PMRLRKLPSFFKPP

rs:XP\_012625989 [XP\_012625989] transcriptional coactivator YAP1 isoform  
X9 [Microcebus murinus]. 85..99

MDPGQQQPPQPAPQGGQPPAQTPOGGQPPSGPGQPAPPASQAAPQAPPAGHQIVHVRGDSETDLEALF  
NAVMNPKTANVPQTVPMRLRKLPSFFKPPPEPKSHSRQASTDAGTAGALTPQHVRHSSPASLQLGAVSPGTLNP  
TGVVSGPAATPAAQHLRQSSFEIPDDVPLPAGWEMAKTSSGQRYFLNHIDQTTTQWQDPRKAMLSQMNVTAPTSPP  
VQQNMMNSASAMNQRIQSAPVKQPPPLAPQSPQGGVMGGGSSNQQQMRLQQLQMEKERLRLKQQELLRQVRPQ  
AMRNINPSTANSPKCQELALRSQLPTLEQDGGTQNAVSSPGMSQELRTMTTNSSDPFLNSGTYHSRDESTDSGLS  
MSSYSVPRTPDDFLNSVDEMMDTGDITINQSTLPSQQNRFPDYLEAIPGTNVDLGTLEGDGMNIEGEEELMPSLQEQAL  
SSDILNDMESVLAATKLDKESFLTWL PMRLRKLPSFFKPP

rs:XP\_012625990 [XP\_012625990] transcriptional coactivator YAP1 isoform  
X10 [Microcebus murinus]. 85..99

MDPGQQQPPQPAPQGGQPPAQTPOGGQPPSGPGQPAPPASQAAPQAPPAGHQIVHVRGDSETDLEALF  
NAVMNPKTANVPQTVPMRLRKLPSFFKPPPEPKSHSRQASTDAGTAGALTPQHVRHSSPASLQLGAVSPGTLNP  
TGVVSGPAATPAAQHLRQSSFEIPDDVPLPAGWEMAKTSSGQRYFLNHIDQTTTQWQDPRKAMLSQMNVTAPTSPP  
VQQNMMNSASAMNQRIQSAPVKQPPPLAPQSPQGGVMGGGSSNQQQMRLQQLQMEKERLRLKQQELLRQAMRN  
INPSTANSPKCQELALRSQLPTLEQDGGTQNAVSSPGMSQELRTMTTNSSDPFLNSGTYHSRDESTDSGLSMSSYS  
VPRTPDDFLNSVDEMMDTGDITINQSTLPSQQNRFPDYLEAIPGTNVDLGTLEGDGMNIEGEEELMPSLQEQALSSDI  
LNDMESVLAATKLDKESFLTWL PMRLRKLPSFFKPP

rs:XP\_012625991 [XP\_012625991] transcriptional coactivator YAP1 isoform  
X11 [Microcebus murinus]. 85..99

MDPGQQQPPQPAPQGGQPPAQTPOGGQPPSGPGQPAPPASQAAPQAPPAGHQIVHVRGDSETDLEALF  
NAVMNPKTANVPQTVPMRLRKLPSFFKPPPEPKSHSRQASTDAGTAGALTPQHVRHSSPASLQLGAVSPGTLNP  
TGVVSGPAATPAAQHLRQSSFEIPDDVPLPAGWEMAKTSSGQRYFLNHIDQTTTQWQDPRKAMLSQMNVTAPTSPP  
VQQNMMNSASAMNQRIQSAPVKQPPPLAPQSPQGGVMGGGSSNQQQMRLQQLQMEKERLRLKQQELLRQVRPQ  
ELALRSQLPTLEQDGGTQNAVSSPGMSQELRTMTTNSSDPFLNSGTYHSRDESTDSGLSMSSYSVPRTPDDFLNS  
VDEMMDTGDITINQSTLPSQQNRFPDYLEAIPGTNVDLGTLEGDGMNIEGEEELMPSLQEQALSSDILNDMESVLAATK  
LDKESFLTWL PMRLRKLPSFFKPP

rs:XP\_012625992 [XP\_012625992] transcriptional coactivator YAP1 isoform  
X12 [Microcebus murinus]. 85..99

MDPGQQQPPQPAPQGGQPPAQTPOGGQPPSGPGQPAPPASQAAPQAPPAGHQIVHVRGDSETDLEALF  
NAVMNPKTANVPQTVPMRLRKLPSFFKPPPEPKSHSRQASTDAGTAGALTPQHVRHSSPASLQLGAVSPGTLNP  
TGVVSGPAATPAAQHLRQSSFEIPDDVPLPAGWEMAKTSSGQRYFLNHIDQTTTQWQDPRKAMLSQMNVTAPTSPP  
VQQNMMNSASAMNQRIQSAPVKQPPPLAPQSPQGGVMGGGSSNQQQMRLQQLQMEKERLRLKQQELLRQELAL  
RSQLPTLEQDGGTQNAVSSPGMSQELRTMTTNSSDPFLNSGTYHSRDESTDSGLSMSSYSVPRTPDDFLNSVDEM  
DTGDITINQSTLPSQQNRFPDYLEAIPGTNVDLGTLEGDGMNIEGEEELMPSLQEQALSSDILNDMESVLAATKLDKE  
SFLTWL PMRLRKLPSFFKPP

rs:XP\_012625993 [XP\_012625993] transcriptional coactivator YAP1 isoform  
X13 [Microcebus murinus]. 85..99

MDPGQQQPPQPAPQGGQPPAQTPOGGQPPSGPGQPAPPASQAAPQAPPAGHQIVHVRGDSETDLEALF  
NAVMNPKTANVPQTVPMRLRKLPSFFKPPPEPKSHSRQASTDAGTAGALTPQHVRHSSPASLQLGAVSPGTLNP  
TGVVSGPAATPAAQHLRQSSFEIPDDVPLPAGWEMAKTSSGQRYFLNHIDQTTTQWQDPRKAMLSQMNVTAPTSPP  
VQQNMMNSASGPLPDGWEQAMTQDGEIYYINHKNKTTSWLDPRLDPRFGKAMNQRIQSAPVKQPPPLAPQSPQG  
VVMGGGSSNQQQMRLQQLQMEKERLRLKQQELLRQVRPQAMRNINPSTANSPKCQELALRSQLPTLEQDGGTQNAV  
AVSSPGMSQELRTMTTNSSDPFLNSGTYHSRDESTDSGLSMSSYSVPRTPDDFLNSVDEMMDTVLPKVYIRAR  
PMRLRKLPSFFKPP

rs:XP\_022604687 [XP\_022604687] protein **FAM181B** [Seriola  
dumerili].>rs:XP\_023261647 [XP\_023261647] protein **FAM181B** [Seriola lalandi  
dorsalis]. 155..169

MAVQTAIMNPQFMNFCFPGSVMEYDVEKSLDGSLLGEAENDEYKETTDRDLSFIDSASSNIKLALDKP  
VSKSRKVNHRKYLQKQIKRCTGIITPGNVAEAPVKRQGSPLAQSPQLQSKTLPKRDGVQANLQSKSLAALFSPVK  
DIRGEKAKKPPLRHRNLPPSFFTEPANCSKVSSTSGMTLKDLEGRNPEAAEFFELLGPDYSNMVSDQDLYHSMPL  
RVQPEMGGPDASYDAHHLVGGLLYSEPWTSCSGPSKKQGESLRTGPAQPPVYCHSEAATGPIEDNALCTLAFPN  
FFTDCSIPQVTYDLSSGGYNRANYSSL PLRHRNLPPSFFTEP

rs:XP\_012710185 [XP\_012710185] protein **FAM181A** [Fundulus heteroclitus].>tr:A0A146SG82\_FUNHE [A0A146SG82] SubName: Full=Uncharacterized protein {ECO:0000313|EMBL:JAQ79661.1}; 104..118  
MSSADSEVKTLLNFVNLAASDIKAAALDKSAPCRRSVDHRKYLQKQLKRFSQKFSRVPRCQTLRSADYRC  
ARAAGAERQSAAVVDEAGSDAQHAQNVGGVTEQVPMRKRQLPASFWEEPRLTKTKRDKSCLDLRRSSSGTSEGT  
NEKRRRSQDDALKTAISSSSRRSSVDKDLKLDLTSHHSVSFCGCWPFQFHGNQVLHSQIVVPHPPVSLWSKAAG  
PEPERPEHPYGQKLHHTHVVKPIPTKPTAQSPIFSVFGFI PMRKRQLPASFWEEP

rs:XP\_012710689 [XP\_012710689] transcriptional coactivator YAP1-like isoform X1 [Fundulus heteroclitus].46..60  
MDAHRGAPPAGQQVVHVRGDSKTELEALFNAVMPGKAARQPHSLPMRMRKLPDSFFKPPPEPRGHSRQA  
SSDGGLCGSLAPHHVRAHSSPASLPVNSLSAQADADAAATPIIPDDVPLPDGWEMAKTPTGQRYFINHVHKT  
QDPRLSQLQSAQAQHQIACPIHAHSFSNPAPTTQPKNIIPETGPLEGWEQAVTADGEMYYIDHINKTTT  
RLAQKVNPNANLGLAMQQRQEKLRKHSILPQFVQESGGSNQMPGGMDHRTAQMLVPSVDVIRALKQEP  
AHSRNESTDSGLSVSSLPRTSDHMLSSVDHMDTGDSSSEPPSMSLQESMPVLPMNDELMPGIPDGLTSD  
VLSGSHMDRDSLLTTL PMRMRKLPDSFFKPP

rs:XP\_012710690 [XP\_012710690] transcriptional coactivator YAP1-like isoform X2 [Fundulus heteroclitus].46..60  
MDAHRGAPPAGQQVVHVRGDSKTELEALFNAVMPGKAARQPHSLPMRMRKLPDSFFKPPPEPRGHSRQA  
SSDGGLCGSLAPHHVRAHSSPASLPVNSLSAQADADAAATPIIPDDVPLPDGWEMAKTPTGQRYFINHVHKT  
QDPRLSQLQSAQAQHQIACPIHAHSFSNPAPTTQPKNIIPETAQKVNPNANLGLAMQQRQEKLRKHSILPQFV  
QESGGSNQMPGGMDHRTAQMLVPSVDVIRALKQEPNLNGAHSRNESTDSGLSVSSLPRTSDHMLSSVDHMDT  
DSSEPPSMSLQESMPVLPMNDELMPGIPDGLTSDILMDMTVLSGSHMDRDSLLTTL PMRMRKLPDSFFKPP

rs:XP\_012730683 [XP\_012730683] transcriptional coactivator YAP1 [Fundulus heteroclitus].>tr:A0A146P8N6\_FUNHE [A0A146P8N6] SubName: Full=Uncharacterized protein {ECO:0000313|EMBL:JAQ39740.1}; 45..59  
MDPNQHNPVGHQIIHVRGDSQTDLELLFNSVMNPKNSNPASLPMRMRKLPDSFFKPPPEPKSHSRQAS  
TDAGSAGVLTPHHVRAHSSPASLQLGAVSGGSLSGMASAGASPOHLRQSSYEIPDDMPLPAGWEMAKTHSGQRYF  
LNHIDKTTTWDPRKSLQMNQPAAPPSSVPVPPQNLMPASGALPEGWEQAITPEGEIYYINHNKTTT  
AQNQPRITQSAPVKQSGQLPPSTHGGVMGGNNQLRPLQIEKERLRLQHRPQELAVRNQLPTSMQDQGSTNPVSS  
PLAQDARTMTVNSSDPFLNSGTYSRDESTDSGLSMSSYSVPRTDDFLNSVDEMDTGDPLPPSIATQPNRFPDY  
LDAIPGTDVDLGTLESESMVVEGEELMASLQEPLSSDILSDMESVLAATKIDKENFLTTL  
PMRMRKLPDSFFKPP

rs:XP\_012730671 [XP\_012730671] LOW QUALITY PROTEIN: protein **FAM181B** [Fundulus heteroclitus]. 262..276  
MNSALHQRVFDLKLKHTWVAGHKQRVKSSGXPLLLFDVLTSSALPPERSPSSSPEVTPNLDCLWKLH  
ERHQEQVFIRGRKSCSEETLSSRITVDATGVAAGLDRVMAVQTAIMNPQFMSFCFPDSVMEYDVEKSLDGSLLCE  
AENDEDFKETTRDLSFIDSASSNIKLALDKPVKSKRKNVHRKYLQKQIKRCTGIITPGNTSEAPVKRQSSPVSQ  
QGPLQSKNLQKREGGANLQSKSLAALFSPEKEIRGEKAKKPPLRHRNLPPSFFTEPANCSRVSSSTSGMTLKDLE  
RGNPEAAEFFELLGPDYSNMVTEQDVYQGVSPRVQPDLGGLDSTSYDHLVSGLLYPEPWTNCLGPKKPGDGLRT  
GPPQPPVYQAEPSVSLDDSGLCTLAFFNFFPDCSIPQAAYDLNGGYSKTSYSCL PLRHRNLPPSFFTEP

rs:NP\_001116819 [NP\_001116819] YAP65-like protein [Bombyx mori].>rs:XP\_028040851 [XP\_028040851] transcriptional coactivator YAP1 isoform X3 [Bombyx mandarina].>tr:B2CMB6\_BOMMO [B2CMB6] SubName: Full=YAP65-like protein {ECO:0000313|EMBL:ACB41089.1}; 44..58  
MALNSDGEQKSNLVLVRVDQSDSVLQSLFDTVLKPDSCRPLQVPLRMRQLPKSFFNPPSTGSKSPSVSH  
SRENSADSAFGSSSATGTSTVSHSRAHSSPASLQQTYYTAGQSSQPPPLHHQHTKQRSYDVGTHIPDDLGLPLAGW  
EQARTPEGQIYYLNHITKTTTWDPRKTLAAQNVANTVQHQAEEALLNQNAQQTITNTATPAAKSTSNTTTDDPLG  
PLPEGWEQATTAEGEIIYFINHAARTTSWFDPRIPQHLQRTVPVGTGAVAGGGWANASIQACQQKLRQLQSLQLERDR

LKQRQQEIRLQQELMARQASSIVSSLASSTGAVASTELPLDPFLPGLTDHQRQESADSGLGMAVPQSYMPHTPE  
DFLSGMDRRMCTSEAGANMDSTDITLGDNI GSTDDLLNEFTNDILLDDVQSLINSTPSKPDNVLTLW  
PLRMRQLPKSFFNPP

rs:NP\_001257838 [NP\_001257838] protein **FAM181A** [Callithrix  
jacchus].>rs:XP\_009004735 [XP\_009004735] PREDICTED: protein **FAM181A** isoform  
X1 [Callithrix jacchus]. 129..143

MASDSVDMKMLLNFNVLASSDIKAALDKSAPCRRSVDHRKYLQKQLKRFSQKYSRLPRGLPGRAAEPYLK  
RGPEDRPGRLLLDLGPDSSPSGGGCKEKLVRNCPREECLAKEQLPQGQHPAAAQPGQVPMRKRQLPASFWEEP  
PTHSHYHVLGQGLGPREGPPYEGKKNCKGLEPLGPETASVPMSPSALVEKESLKMPGVSLVGRVNAWSCCPFYH  
GQPIYPGPLGALPQSPVPSLGLWRKSPAFFGELAHLCCKDADGLGQKVCPRMVLKPIPTKPAVPPPIFNVFYGL  
PMRKRQLPASFWEEP

rs:XP\_021448793 [XP\_021448793] protein **FAM181B** isoform X1 [Oncorhynchus  
mykiss]. 195..209

MAVQTAIMNSPFVNFVFCFPGSVMMMEYDMGQSLDGSPLEESEERGDYRETTRSLDGSPLEESEERGEYRET  
TRNLLSFIDSASSNIKLALDKPVKSKRKVNHRKYLQKQIKRCTGFISPTGNPAAAPGANKRKVSGFPTQTQTQPQ  
TQLQTQPSPFQQKPVHKRDGLQANLQTKSLAALFNSVKEPVKGERAKKPLRHRNLPPSFFTEPANTTTTSRV  
STPGMFLGDLERGAGNPDDFDLLGPDYSNMLSQDQVDFQTRGLPSRVIDQDVFQTRGLPSRIIDQDMFQTRGLPSR  
ILQHQQTQDITDQVSPYDPHHLVGGFLYTEPWTSSPSKKAGEGVRTGPGTQTPLYCQSGEGVRTGPGTQTPLYCQ  
SGECVRTGPGTQTPLYCHSVSDSSATGSTEDSNLCTLAFFNFFPDCSVSVQVSYGLSSGGYNTKDFSSL  
PLRHRNLPPSFFTEP

rs:XP\_021448794 [XP\_021448794] protein **FAM181B** isoform X2 [Oncorhynchus  
mykiss]. 195..209

MAVQTAIMNSPFVNFVFCFPGSVMMMEYDMGQSLDGSPLEESEERGDYRETTRSLDGSPLEESEERGEYRET  
TRNLLSFIDSASSNIKLALDKPVKSKRKVNHRKYLQKQIKRCTGFISPTGNPAAAPGANKRKVSGFPTQTQTQPQ  
TQLQTQPSPFQQKPVHKRDGLQANLQTKSLAALFNSVKEPVKGERAKKPLRHRNLPPSFFTEPANTTTTSRV  
STPGMFLGDLERGAGNPDDFDLLGPDYSNMLSQDQVDFQTRGLPSRVIDQDVFQTRGLPSRIIDQDMFQTRGLPSR  
ILQHQQTQDITDQVSPYDPHHLVGGFLYTEPWTSSPSKKAGEGVRTGPGTQTPLYCQSGEGVRTGPGTQTPLYCH  
SVSDSSATGSTEDSNLCTLAFFNFFPDCSVSVQVSYGLSSGGYNTKDFSSL PLRHRNLPPSFFTEP

rs:XP\_021447504 [XP\_021447504] transcriptional coactivator YAP1-like,  
partial [Oncorhynchus mykiss]. 45..59

MDPSQHNPAGHQIIHVRGDSETDLEALFNAMNPKNTIVPPSVPMRMRKLPDSFFKPPPEPKSHSRQTS  
TDAGTAGAIAPHVRAHSSPASLQLGAVSPLLGMVPAGAPPSHLRQSSYEIPEDMPLPPGWEMAKTPSGQRYFLN  
HLDQSTTWLDRKALLQMNQAPPTSPVPVQQQNMIMSPASGPLPDCWEQAVTSEGEVYYINH  
PMRMRKLPDSFFKPP

rs:XP\_021473000 [XP\_021473000] transcriptional coactivator YAP1-like  
[Oncorhynchus mykiss]. 48..62

MDARQQCAPPVQQIVHVRGDSQTDLEALFNAMNPKTSALPPSSLPMRMRKLPDSFFRQPDPRSHSR  
QASSDGTIVGSLTPHHVRAHSSPASLPINALSAPATSAMATQPLPDDVPLPPGWEMTKTPSGQCYFLNHLDQTTT  
WHDPRLSHLQTNAAHLLSAPPPHTHTLAHPAPNTHQTSNTSSNTGPLEGWEQAVTPEGEVYYINHITKTTSWL  
DPHLVQSAVAQVKPSTLSDPVGIAVVTKRRQQQLQVEKDRLRKQQLDARPIRLQDVAVRSGLEHDGKMRNNHVD  
PALNGAHSRNQSTDSGLSVSSFTTRTPDDLNTVELMDTGDGAGQPMAFLEAGPGVCMATDGEELMPSIQEALSS  
DLLSDMDTVLWL PMRMRKLPDSFFRQP

rs:XP\_022089413 [XP\_022089413] uncharacterized protein LOC110978601  
[Acanthaster planci].>rs:XP\_022089414 [XP\_022089414] uncharacterized  
protein LOC110978601 [Acanthaster planci]. 244..258

MMATEMAVGFQGMASAFGHNFPLPHHPMGYDYAQRPNYQDHVMMGHRQQQDEEEEDIEDEDIDE  
ESENESMYTSADMSEIASEDLAEPEPNVAEQLEFAEAVNRDIQKYFGRKKSAAHEPESVGTLYEDRFASGKSGR  
ELYADLLRVAQNGDAAEPYTTGRSRRTDSSVSPRTSTSSASTENADVNTANYSCKKGLGPLKELDFAIIGGCVD  
SVNDRHGGQWQRQSSQKCLQTLPWKRALPSSFFMEPGARDQSRGTGGAGNVGYGPHVTMI TEHETPDFSDLVA  
NFTSDYDSQITATTISH PWRKRALPSSFFMEP

rs:XP\_022098030 [XP\_022098030] transcriptional coactivator YAP1-A-like  
isoform X1 [Acanthaster planci]. 44..58

METQNQQAQPRQVLHVRSDSDAELEDLFKSVMNPRETSQSSSIPMRMRNLPSFFKEPDRVHAHHSRES  
SADSTNYGPSANGSNVSGSGQTLAAPGLTVAHSRAHSSPAALQEMHAVGAQSLQHQLRQQSYDITDDNTPLPPG  
WEMASTSTGQRYLLDDKGRFLLSTPKPDNNHRHTTTWQDPRKTLSTSQLNKVNSVAPNPPPTLTAQINTMTPPP  
PTGSQQPLPAMQDLGPLPPNWEQATTPEGEVYFINHLERTTTWLDPRIAMRAPGTVQAAAAALQNTQQTAAQPAQ  
QTMAISPTPAQQASKVPGPDISLQQRQQQLRLQRLQOMERECLQRRQQEILQQMAASGKNRSLPRNFWPQEGSAHM  
KGGQGSVPKEMQLRRDLDPATVSNNGSDGNAVSTTGLDPFLSSGNTSNFHSREESGDSGCGMSNYSHPRTPDDL  
NVEDMEAIEGERKTPIAPLTPRQHMDFLDSMPGTNIDMGPMEGNGDNSNQGNMDSDELVPSLHEALNTDILNDV  
LSSPNRIENFLTWL PMRMRNLPSFFKEP

rs:XP\_022098031 [XP\_022098031] transcriptional coactivator YAP1-A-like  
isoform X2 [Acanthaster planci]. 44..58

METQNQQAQPRQVLHVRSDSDAELEDLFKSVMNPRETSQSSSIPMRMRNLPSFFKEPDRVHAHHSRES  
SADSTNYGPSANGSNVSGSGQTLAAPGLTVAHSRAHSSPAALQEMHAVGAQSLQHQLRQQSYDITDDNTPLPPG  
WEMASTSTGQRYLLDHNHRHTTTWQDPRKTLSTSQLNKVNSVAPNPPPTLTAQINTMTPPPPTGSQQPLPAMQDLG  
PLPPNWEQATTPEGEVYFINHLERTTTWLDPRIAMRAPGTVQAAAAALQNTQQTAAQPAQQTMAISPTPAQQASK  
VPGPDISLQQRQQQLRLQRLQOMERECLQRRQQEILQQMAASGKNRSLPRNFWPQEGSAHMKGGQGSVPKEMQLRR  
DLDPATVSNNGSDGNAVSTTGLDPFLSSGNTSNFHSREESGDSGCGMSNYSHPRTPDDLNSNVEDMEAIEGERKT  
PIAPLTPRQHMDFLDSMPGTNIDMGPMEGNGDNSNQGNMDSDELVPSLHEALNTDILNDVLSPPNRIENFLTWL  
PMRMRNLPSFFKEP

rs:XP\_022098032 [XP\_022098032] transcriptional coactivator YAP1-A-like  
isoform X3 [Acanthaster planci]. 44..58

METQNQQAQPRQVLHVRSDSDAELEDLFKSVMNPRETSQSSSIPMRMRNLPSFFKEPDRVHAHHSRES  
SADSTNYGPSANGSNVSGSGQTLAAPGLTVAHSRAHSSPAALQEMHAVGAQSLQHQLRQQSYDITDDNTPLPPG  
WEMASTSTGQRYLLDDKGRFLLSTPKPDNNHRHTTTWQDPRKTLSTSQLNKVNSVAPNPPPTLTAQINTMTPPP  
PTGSQQPLPAMQDLGPLPPNWEQATTPEGEVYFINHLERTTTWLDPRIAMRAPGTVQAAAAALQNTQQTAAQPAQ  
QTMAISPTPAQQASKVPGPDISLQQRQQQLRLQRLQOMERECLQRRQQEILQQEMQLRRDLDPATVSNNGSDGNAV  
S TTGLDPFLSSGNTSNFHSREESGDSGCGMSNYSHPRTPDDLNSNVEDMEAIEGERKTPIAPLTPRQHMDFLDS  
M PGTNIDMGPMEGNGDNSNQGNMDSDELVPSLHEALNTDILNDVLSPPNRIENFLTWL PMRMRNLPSFFKEP

rs:XP\_005623810 [XP\_005623810] protein **FAM181A** isoform X1 [Canis lupus  
familiaris].>rs:XP\_025298440 [XP\_025298440] protein **FAM181A** isoform X1  
[Canis lupus dingo]. 173..187

MAHLEQNSLQRCGKVSSVFPFGAASHQQSPSSWKAPCSGLVMASDSDVKMLLNFNVLASSDIKAAL  
DKSAPCRRSVDHRKYLQKQLKRFSQKYSRLPRGLPGRGAEPHLKRGAEPRGRLPLGSGHDSSTGEGGGCKEKAL  
GNPYREECLSKEQTLQRQNPEAARPGQVPMRKRQLPASFWEEPPTHSYPLGLEGLGPREGPPYESSKKHCKGLE  
PLDPETAPVPTSPRAPAEKEPLKMSGVSLVGRVNAWSCCPFYHQPVYAGPPGALPQSPVPLGLWRKSPASPG  
ELAHFCKHVDGPGQKVYRPVVLKPIPTKPAVPPPIFNVFGYL PMRKRQLPASFWEEP

rs:XP\_005623811 [XP\_005623811] protein **FAM181A** isoform X2 [Canis lupus  
familiaris].>rs:XP\_022278047 [XP\_022278047] protein **FAM181A** isoform X2  
[Canis lupus familiaris].>rs:XP\_025298441 [XP\_025298441] protein **FAM181A**  
isoform X2 [Canis lupus dingo]. 129..143

MASDSDVKMLLNFNVLASSDIKAALDKSAPCRRSVDHRKYLQKQLKRFSQKYSRLPRGLPGRGAEPHLK  
RGAEDRPGRLPLGSGHDSSTGEGGGCKEKALGNPYREECLSKEQTLQRQNPEAARPGQVPMRKRQLPASFWEEP  
PTHSYPLGLEGLGPREGPPYESSKKHCKGLEPLDPETAPVPTSPRAPAEKEPLKMSGVSLVGRVNAWSCCPFYH  
QGPVYAGPPGALPQSPVPLGLWRKSPASPGELAHFCKHVDGPGQKVYRPVVLKPIPTKPAVPPPIFNVFGYL  
PMRKRQLPASFWEEP

rs:XP\_850835 [XP\_850835] LOW QUALITY PROTEIN: protein **FAM181B** [Canis  
lupus familiaris]. 221..235

MAVQAALLSTHPFVFGGSPDALGGAFGALDKGCCFEDDEPGPPAGALLAGAEGGDVREATRDLLSF  
MDSASSNIKLALDKPGKSKRKNHRKYLQKQIKRCSGLMGAAPPSPGAADAPAKRPLGAAGAQAQAVAGPPGK  
AAPPREASQAAAANSLSRSLAALFDSLHRVPA DERPGASGAAPAAALGAAGAGGSGDAAGPAGGTAGPGARK  
VPLRARNLPSFFTEPSRAGRGCPSGPGVSLGDLEKGA DALEILELAGSGTGAGAGAVLLAAEPLVFPAGAA  
VLRGPELEPGLFEPPAATV GALLYPEPWSAPGCPPAKRPPPAAPRGGALTEPLRPAYPAAADCQGGEDAPGLL  
ASFAPFFSDCALPPQPPRQPHQVSYEYGAGYGRSGYAGLWRPDAAWEGAPGEEGAPRD PLRARNLPSFFTEP

rs:XP\_023136250 [XP\_023136250] transcriptional coactivator YAP1 [Amphiprion ocellaris].>tr:A0A3P8T0A1\_AMPPE [A0A3P8T0A1] SubName: Full=Yes-associated protein 1 {ECO:0000313|Ensembl:ENSAPEP00000017206}; 45..59  
MDPSQHNPAGHQIVHVRGDSETDLEALFNAVMPKNTIVPPSVPMRMRKLPDSFFKPPPKSHSRQAS  
TDAGSGGVLTPHHVRAHSSPASLQLGAVSGGSLSGMASAGASPOHLRQSSYEIPDDAPLPAGWEMAKTASGQRYF  
LNHIDQTTTWDPRKALLQMNQPPPPSSVPPVQQNLMPASGPLPEGWEQAITSEGEIYYINHKNKTTSWLDPRL  
EPRYALNQORITQSAPVKQGGQLPPSHSAVMGGNNQLRLQOIEKERLRLKQOELLRQRPQELALRNQLPTSMQD  
DGSTNPVSSPMAQDARTMTANSSDPFLNSGTYHSRDESTDSGLSMSSYSVPRTPDDFLNSVDEMDTGDPLPTSMA  
TQPSRFPDYLDITPGTDVLDLGTLESESMAVEGEELMPSLQEQALSSDILNDMESVLAATKIDKESFLTWL  
PMRMRKLPDSFFKPP

rs:XP\_023141768 [XP\_023141768] protein **FAM181A** [Amphiprion ocellaris].  
104..118  
MANADSEVKTLNLFVNLAASSDIKAALDKSAPCRRSVDHRKYLQKQLKRFSQKYSRVPRCHTHRSAEYRC  
AKPAGTVHQSVTVSEKASSDAQDVENVGSVAEQVPMRKRQLPASFWEEPQLTKREHSYLGKKSPTGSEGNEN  
EKRRSYDEDATMSASSRRNSVDKETLKLDSLSSHQCVSVCGCCPFQYHGHQVLHSHIVVPHPALGLWSKAAGT  
ETERPEHPYGQKIHTHVVKPIPTKPTAQSPIFSFGFI PMRKRQLPASFWEEP

rs:XP\_023144274 [XP\_023144274] transcriptional coactivator YAP1-like isoform X1 [Amphiprion ocellaris].>rs:XP\_023144276 [XP\_023144276] transcriptional coactivator YAP1-like isoform X1 [Amphiprion ocellaris].>tr:A0A3P8UC39\_AMPPE [A0A3P8UC39] SubName: Full=Uncharacterized protein {ECO:0000313|Ensembl:ENSAPEP00000033083}; 46..60  
MDAHRGAPPAGQQIVHVRGDSQTELEALFNAVMPSSSARQPSSVPMRMRKLPDSFFRQPEPRGHSRQA  
SSDGGVCGSLTPHHVRAHSSPASLPVNSLSTQAADVATTPIIIPDDVPLPHGWEMAKTATGQRYFLNHRDKTTTWH  
DPRLSQLQSAAAQHPISGPPVHAHSLSNPATTQPQNINPETGPLPEGWEQAVTADGEVYIIDHINKTTTWDPR  
LAQKMNPGLLGLAMQQRQEKERLRCKQGLPQITSDAGGRSQMPGGMDHDRSTQTLVPPLDVIRIRASNHEPTLN  
GAHSRNESTDSGLSVSSLPRTSDHMLSSVDHMDTGESVEPPSMALQESMPVLPMSGEELMPCIEPEGLSSDLLMD  
METVLSGSHMDRDSLTLWL PMRMRKLPDSFFRQP

rs:XP\_023144277 [XP\_023144277] transcriptional coactivator YAP1-like isoform X2 [Amphiprion ocellaris]. 46..60  
MDAHRGAPPAGQQIVHVRGDSQTELEALFNAVMPSSSARQPSSVPMRMRKLPDSFFRQPEPRGHSRQA  
SSDGGVCGSLTPHHVRAHSSPASLPVNSLSTQAADVATTPIIIPDDVPLPHGWEMAKTATGQRYFLNHRDKTTTWH  
DPRLSQLQSAAAQHPISGPPVHAHSLSNPATTQPQNINPETAQKMNPGLLGLAMQQRQEKERLRCKQGLPQIT  
SQDAGGRSQMPGGMDHDRSTQTLVPPLDVIRIRASNHEPTLNGAHSRNESTDSGLSVSSLPRTSDHMLSSVDHMDT  
GESVEPPSMALQESMPVLPMSGEELMPCIEPEGLSSDLLMDMETVLSGSHMDRDSLTLWL  
PMRMRKLPDSFFRQP

rs:XP\_023118553 [XP\_023118553] LOW QUALITY PROTEIN: protein **FAM181B** [Amphiprion ocellaris]. 246..260  
MQVVGHKQRVKXPALPLPLLDVLTSLARPPERSPRXSSEPVSTLECLQELHEQHQQDQVFIKGGKTC  
EEIWGSEITVDATGVAAGLNRVMAVQTAIMNPQFMNFCFPGSVMEYDVEKSLDGSLLGEAENDEYKETTRDLLS  
FIDSASSNIKALDKPVKSKRKNVHRKYLQKQIKRGTGIIIPGNVAEAPVKRQGSPLTQPSPLQSKTLPKRDGVQ  
ANLQSKSLAALFSPVKDIRGEKAKKPLRHRNLPPSFFTEPANCSKVSSTSGMSLKDLEGRNPEAADFFELLGPD  
YSNMVSDQDLYQGMPFRVQPELGGPDASYDAHHLVGGLLYSEPWTSCSGPSKKGGETLRTGPAQPPAYCHSEAA  
SGPIEDNALCTLAFFNFFTDCSIPQVTYDLSGGYNRANYSSL PLRHRNLPPSFFTEP

rs:XP\_024423123 [XP\_024423123] protein **FAM181A** [Desmodus rotundus].  
129..143  
MASDSVDMKLLNLFVNLAASSDIKAALDKSAPCRRSVDHRKYLQKQLKRFSQKYSRLPRGLPGRGPEPHLK  
RGPEDRPGRLPLNSGPDASPAGGGDCKEKALGNPYGVECLSKEQTLQGNTEATRPGQVPMRKRQLPASFWEEP  
PTHSYPMGLEGLVGPREGLPYEGKKHCKGLELLGPEMALVPMSPRPPGEKEPPKMPGVSLVGRVNAWSCC  
PFQYH  
GQPVYPPGPGALPQGPISLGLWRKSPTSPGELAHFCKDADGPGQKVYRPVVLKPIPTKAMPPIFNVFGYL  
PMRKRQLPASFWEEP

rs:XP\_024428604 [XP\_024428604] protein **FAM181B** [Desmodus rotundus].  
221..235  
MAVQAALLSTHPFVFGFGSSPDGLGGAFGALDKGCCFEDDETGTPAGALLAGTEGGDVREATRDL  
LSF

IDSASSNIKLALDKPGKSKRKVNHRKYLQKQIKRCSGLMGAASPGPSSPGAADTPAKRALGAPSAQTVAVPVHGK  
AAPRRDASQAATAASLQSRSLAALFDSLRLHIPGAADSAGGSVAAPTVLGGAGAGGAVGDAAGPAGVSALPGSRK  
VPLRARNLPPSFFTEPRASGGGCGPSGCLSLGDLEKGSLENLEFFELLGPDYAGPEAGVLLAAEPLDVFPTGAT  
VLRGPPPEMEPGLFEPPPAMVGSLLYPETWSAPACPTTKQSLATPRGGSTLNEPLRRLYPVTVDSGGEDGPGLL  
ASFSPFFSDCALPPPPTPHQVSYEYSAGYGRYAYSSSLWRSDGAWEGGPGEEGAHRD PLRARNLPPSFFTEP

rs:XP\_024430400 [XP\_024430400] transcriptional coactivator YAP1 isoform  
X1 [Desmodus rotundus]. 13..27

MNPKTANVPQTVPMRLRKLKLPDSFFKPPPEPKSHSRQASTDAGSAGALTPQHVAHSSPASLQLGAVSPGT  
LTPTGVVSGPAATPTAQHLRQSSFEIPDDVPLPAGWEMAKTSSGQRYFLNHIDQTTTWQDPRKAMLSQLNVTAPT  
SPPVQONMMNSASGPLPDGWEQAMTQDGEIYYINHKNKTTSWLDPRLDPRFGKAMNQRISQSAPVKQPPPLAPQS  
PQGGVMGGGNSNQQQMRLQQLQMEKERLRLKQOELLRQAMRNINPSTANSPKCQELALRSQLPTLEQDGGTQNP  
VSSPGMSQELRTMTTNSDPFLNSGTYHSRDESTDSGLSMSSYSVPRTPDFFLNSVDEMDTGDTINQSTLPSQQN  
RFPDYLEAIPGTNVDLGTLEGDMNIEGELMPSLQEQALSSDILNDMESVLAATKLDKESFLTWL  
PMRLRKLKLPDSFFKPP

rs:XP\_024430401 [XP\_024430401] transcriptional coactivator YAP1 isoform  
X2 [Desmodus rotundus]. 13..27

MNPKTANVPQTVPMRLRKLKLPDSFFKPPPEPKSHSRQASTDAGSAGALTPQHVAHSSPASLQLGAVSPGT  
LTPTGVVSGPAATPTAQHLRQSSFEIPDDVPLPAGWEMAKTSSGQRYFLNHIDQTTTWQDPRKAMLSQLNVTAPT  
SPPVQONMMNSASGPLPDGWEQAMTQDGEIYYINHKNKTTSWLDPRLDPRFGKAMNQRISQSAPVKQPPPLAPQS  
PQGGVMGGGNSNQQQMRLQQLQMEKERLRLKQOELLRQVVRPQELALRSQLPTLEQDGGTQNPVSSPGMSQELRT  
MTTNSDPFLNSGTYHSRDESTDSGLSMSSYSVPRTPDFFLNSVDEMDTGDTINQSTLPSQQNRFPDYLEAIPGT  
NVDLGTLEGDMNIEGELMPSLQEQALSSDILNDMESVLAATKLDKESFLTWLPMLRKLKLPDSFFKPP

rs:XP\_024430403 [XP\_024430403] transcriptional coactivator YAP1 isoform  
X3 [Desmodus rotundus]. 13..27

MNPKTANVPQTVPMRLRKLKLPDSFFKPPPEPKSHSRQASTDAGSAGALTPQHVAHSSPASLQLGAVSPGT  
LTPTGVVSGPAATPTAQHLRQSSFEIPDDVPLPAGWEMAKTSSGQRYFLNHIDQTTTWQDPRKAMLSQLNVTAPT  
SPPVQONMMNSASGPLPDGWEQAMTQDGEIYYINHKNKTTSWLDPRLDPRFGKAMNQRISQSAPVKQPPPLAPQS  
PQGGVMGGGNSNQQQMRLQQLQMEKERLRLKQOELLRQELALRSQLPTLEQDGGTQNPVSSPGMSQELRTMTTN  
SSDPFLNSGTYHSRDESTDSGLSMSSYSVPRTPDFFLNSVDEMDTGDTINQSTLPSQQNRFPDYLEAIPGTNVDL  
GTLEGDMNIEGELMPSLQEQALSSDILNDMESVLAATKLDKESFLTWL PMRLRKLKLPDSFFKPP

rs:XP\_024430404 [XP\_024430404] transcriptional coactivator YAP1 isoform  
X4 [Desmodus rotundus]. 13..27

MNPKTANVPQTVPMRLRKLKLPDSFFKPPPEPKSHSRQASTDAGSAGALTPQHVAHSSPASLQLGAVSPGT  
LTPTGVVSGPAATPTAQHLRQSSFEIPDDVPLPAGWEMAKTSSGQRYFLNHIDQTTTWQDPRKAMLSQLNVTAPT  
SPPVQONMMNSASGPLPDGWEQAMTQDGEIYYINHKNKTTSWLDPRLDPRFAMNQRISQSAPVKQPPPLAPQSPQ  
GGVMGGGNSNQQQMRLQQLQMEKERLRLKQOELLRQELALRSQLPTLEQDGGTQNPVSSPGMSQELRTMTTNS  
DPFLNSGTYHSRDESTDSGLSMSSYSVPRTPDFFLNSVDEMDTGDTINQSTLPSQQNRFPDYLEAIPGTNVDLGT  
LEGDMNIEGELMPSLQEQALSSDILNDMESVLAATKLDKESFLTWL PMRLRKLKLPDSFFKPP

rs:XP\_020490507 [XP\_020490507] transcriptional coactivator YAP1 isoform  
X1 [Labrus bergylta]. 45..59

MDQGHQHNPPAGHQIVHVRGDSETDLETFLNFAVMNPKNTIVPPSVPMRMRKLKLPDSFFKPPPEPKSHSRQAS  
TDGGSGGVLTPHHVAHSSPASLQLGAVSGGSLSGMPPAGASQHLRQSSYEIPDDVPLPHGWEMAKTASGQRYF  
LNHIDQTTTWQDPRKALLQMNQAPPPSSVPVQQONLMNPASGPLPDGWEQAITSEGEIYYINHKNKTTSWLDPR  
DPRFALNQQRITQSAPGKQGGQLPPSHSAVMAGNQMRLLQIEKERLRLKQOELLRQRPELALRTQLPMDQDGS  
NPVSSPMAQDARTMTANSSDPFLNSGTYHSRDESTDSGLSMSSYSVPRTPDFFLNSVDEMDTGDPDLPQSMVTQPS  
RFPDYLDLAIPTDVLGTLESESMAVEGEELMPSLQEQALSSDILNDMESVLAATKIDKESFLTWL  
PMRMRKLKLPDSFFKPP

rs:XP\_020490508 [XP\_020490508] transcriptional coactivator YAP1 isoform  
X2 [Labrus bergylta]. 45..59

MDQGHQHNPPAGHQIVHVRGDSETDLETFLNFAVMNPKNTIVPPSVPMRMRKLKLPDSFFKPPPEPKSHSRQAS  
TDGGSGGVLTPHHVAHSSPASLQLGAVSGGSLSGMPPAGASQHLRQSSYEIPDDVPLPHGWEMAKTASGQRYF  
LNHIDQTTTWQDPRKALLQMNQAPPPSSVPVQQONLMNPASALNQQRITQSAPGKQGGQLPPSHSAVMAGNQMR  
LLQIEKERLRLKQOELLRQRPELALRTQLPMDQDGSNTNPVSSPMAQDARTMTANSSDPFLNSGTYHSRDESTDSG



LSMSSYSVPRTPDDFLNSVDEMDTGDPLQPSMVTQPSRFPDYLDALPGTDVDLGTLESESMAVEGEELMPSLQEA  
LSSDILNDMESVLAATKIDKESFLTWL PMRMRKLPDSFFKPP

rs:XP\_020490554 [XP\_020490554] protein **FAM181B** [Labrus bergylta].  
155..169

MAVQTAIMNPQFMNFCFPGSVMEYDVEKSLDGSLLGEAENDEYYKETTRDLLSFIDSASSNIKLALDKP  
VKSKRKVNHRKYLQKQIKRCTGIITPGNVAEAPVKRQGSPLAQPSPLQSKTLPKRDGVQANLQSKSLAALFSPVK  
DVRGEKAKKPLRHRNLPPSFFTEPANCSKVSSTSGMTLKDLEGRNPEAAEFFELLGPDYSNMVSDQDLYQSMPL  
RLQPEMGGPDASYDAHHLVGGLLYSEPWTSCSGPSKAGGSLRTGPAQPPVYCPSEAAGALEDNLTCLTALFPNF  
FTDCSIPQVSYDLSGGYNRANYSSL PLRHRNLPPSFFTEP

rs:XP\_025062089 [XP\_025062089] protein **FAM181A** [Alligator  
sinensis].>tr:A0A3Q0GQL7\_ALLSI [A0A3Q0GQL7] SubName: Full=protein **FAM181A**  
{ECO:0000313|RefSeq:XP\_025062089.1}; 126..140

MASDSEVKMLLNLFVNLASSDIKAALDKSAPCRRSVDHRKYLQKQLKRFSQKYSRIPRSHPSKSMESNMK  
RGVEDRNHSSHPDAVDPNPCRATSEKALRGAEVEENLSGEQGLQEQSPESARPDQVPMRKRQLPASFWEEP  
SLLVGSFPAGLDGLPKSRDLPSYEGKKSPPDATGPESPPVQVQPSGEKEPIKVPGTSLSGRMNAWSCCPEFYH  
GQPVYQTPGALPQSPFPLGLWRKNTAPQGEIQHFCKETDATGQKLFRRPVVLKPIPTKPAVPPPIFNVFGYL  
PMRKRQLPASFWEEP

rs:XP\_020818081 [XP\_020818081] transcriptional coactivator yorkie isoform  
X1 [Drosophila serrata]. 60..74

MSTSNTNNLIEKEIDDEDMLSPIKPNLNVVRVNDTDDNLQALFDSVLNPGDAKRPLQLPFRMRKLPNS  
FFTTPAPSHSRANSADSTYDAGSQQSNISNISSIKAAQPVQDQPPISAIQIQQPSQQSRLAIHHFRARSSPASL  
QQNYNVRARSEANPGASQQPAGPTFPENSAAEFPSGATAPSSIELDAMNSCMSQDMPMSTQTVHKKQRSYDVVS  
PIQLQRQLGALPPGWEQAKTNDGQIYYLNHTTKSTQWEDPRIQFRQQQSLMAERIKQNDVLTQTTKQTTTSTIAN  
NMGPGLPDGWEQAVTESGDIYFINHIDRTTWNDRMQSGLSVLDCPDNLVSSLQIEDNICSNLFNDAQTIVNP  
PSSHKPDDEWYKIN PFRMRKLPNSFFTTP

rs:XP\_020818082 [XP\_020818082] transcriptional coactivator yorkie isoform  
X2 [Drosophila serrata]. 60..74

MSTSNTNNLIEKEIDDEDMLSPIKPNLNVVRVNDTDDNLQALFDSVLNPGDAKRPLQLPFRMRKLPNS  
FFTTPAPSHSRANSADSTYDAGSQQSNISNISSIKAAQPVQDQPPISAIQIQQPSQQSRLAIHHFRARSSPASL  
QQNYNVRARSEANPGASQQPAGPTFPENSAAEFPSGATAPSSIELDAMNSCMSQDMPMSTQTVHKKQRSYDVVS  
PIQLQRQLGALPPGWEQAKTNDGQIYYLNHTTKSTQWEDPRIQFRQQQSLMAERIKQNESGLSVLDCPDNLVSS  
LQIEDNICSNLFNDAQTIVNPPSSHKPDDEWYKIN PFRMRKLPNSFFTTP

rs:XP\_020849481 [XP\_020849481] LOW QUALITY PROTEIN: protein **FAM181B**  
[Phascolarctos cinereus]. 243..257

MAVQAAILSPHHFIPFCFPGSPGALGMDFGDLKGCCEDEAGGTGVALLGEAVAAEGAGGGSGGGDL  
REATRDLLSFIDSASSNIKLALDKPVKSKRKVNHRKYLQKQIKRCTGMMTSSSASSSGPAPSVPSPGAAA  
GAPEAPPKRLPAASPAAPGPGKAPKREGSQAASLQSKSLAALFESLHQVRNGGEGKGGAGTLATVAGGGGG  
GGVGAEGGGPLVAAAGAGGGKVPPLRNRNLPPSFFTEPSRAGGCGPSGGGVTLRELEKGEAVEFFELLSPDYCA  
GGEVGGLLPSEPLDLFPAAVRAPQELEHILYDPHPTVVAGLLYSEPWSTPCPPAKKPAASNRGGGLTLSETLR  
PLYPGTSDSAASSLXPGGEDTAGHLTPFAQFFPDCALPTPPPHQMPYDYGVGYSRVAYSGL  
PLRNRNLPPSFFTEP

rs:XP\_020851776 [XP\_020851776] transcriptional coactivator YAP1 isoform  
X1 [Phascolarctos cinereus]. 89..103

MDPGQQPPQAPSQQGQAPSQQPQGGQGPPTGPGQQAPPAGPSQAAPPPPPAGHQIVHVRGDSETDL  
EALFNAVMPKNTANVPQTVPMLRKLKLPDSFFKPPPEPKSHSRQASTDAGTAGALTPQHVRHSSPASLQLGAVSPG  
TLSPSGVVGPGAAPTQHLRQSSFEIPDDVPLPAGWEMAKTSSGQRYFLNHIDQTTTWDPRKAMLSQMNV  
TAP TSPPVQQNIMNSASGPLPDGWEQAMTQDGEIYYINHKNTTSLWDLPRLDPRFGKAMNQRISQSAPVKQPP  
LAPQ SPQGGVMGGGSSNQQQMRLQQLQMEKERLRLKHQELLRQVRPQALRNVPSTANS  
PKRQEIALLRSQLPTMEQDGTQNPVSSPGMNQELRMTTNSSDPFLNSGTYHSRDESTDSGLSMSSYSVPRTPDDFLNSVDEMDTGD  
SISQSNIPSQQRFPDYLEAIPGTNVLDLGTLEGDGMNIEGEELMPSLQEAALSSDILNDMESVLAATKIDKESFLTWL  
PMRLRKLKLPDSFFKPP

rs:XP\_020851777 [XP\_020851777] transcriptional coactivator YAP1 isoform X2 [Phascolarctos cinereus]. 89..103

MDPGQQPPQAPSQGGQAPSQPPQGGQGPPTGPGQQAPPAGPSQAAPPPPPAGHQIVHVRGDSETDL  
EALFNAVMPKNTANVPQTVPMRLRKLKLPDSFFKPPPEPKSHSRQASTDAGTAGALTPQHVRHSSPASLQLGAVSPG  
TLSPSGVVSGPGAAPTQHLRQSSFEIPDDVPLPAGWEMAKTSSGQRYFLNHIDQTTTWQDPRKAMLSQMNVTA  
TSPPVQQNIMNSASGPLPDGWEQAMTQDGEIYYINHKNKTTSWLDPRLDPRFAMNQRISSAPVKQPPPLAPQSP  
QGGVMGGGSSNQQQMRLQQLQMEKERLRLKHQELLRQVRPQALRNVPSTANSPPKRQEIARSQLPTEQDGGT  
QNPVSSPGMNQELRTMTTNSDPFLNSGTYHSRDESTDSGLSMSSYSVPRTPDFFLNSVDEMDTGDSISQSNIPS  
QQNRFPDYLEAIPGTNVDLGTLEGDGMNIEGEELMPSLQEQALSSDILNDMESVLAATKLDKESFLTWL  
PMRLRKLKLPDSFFKPP

rs:XP\_020851778 [XP\_020851778] transcriptional coactivator YAP1 isoform X3 [Phascolarctos cinereus]. 89..103

MDPGQQPPQAPSQGGQAPSQPPQGGQGPPTGPGQQAPPAGPSQAAPPPPPAGHQIVHVRGDSETDL  
EALFNAVMPKNTANVPQTVPMRLRKLKLPDSFFKPPPEPKSHSRQASTDAGTAGALTPQHVRHSSPASLQLGAVSPG  
TLSPSGVVSGPGAAPTQHLRQSSFEIPDDVPLPAGWEMAKTSSGQRYFLNHIDQTTTWQDPRKAMLSQMNVTA  
TSPPVQQNIMNSASGPLPDGWEQAMTQDGEIYYINHKNKTTSWLDPRLDPRFGKAMNQRISSAPVKQPPPLAPQ  
SPQGGVMGGGSSNQQQMRLQQLQMEKERLRLKHQELLRQALRNVPSTANSPPKRQEIARSQLPTEQDGGTQ  
NPVSSPGMNQELRTMTTNSDPFLNSGTYHSRDESTDSGLSMSSYSVPRTPDFFLNSVDEMDTGDSISQSNIPS  
QQNRFPDYLEAIPGTNVDLGTLEGDGMNIEGEELMPSLQEQALSSDILNDMESVLAATKLDKESFLTWL  
PMRLRKLKLPDSFFKPP

rs:XP\_020851779 [XP\_020851779] transcriptional coactivator YAP1 isoform X4 [Phascolarctos cinereus]. 89..103

MDPGQQPPQAPSQGGQAPSQPPQGGQGPPTGPGQQAPPAGPSQAAPPPPPAGHQIVHVRGDSETDL  
EALFNAVMPKNTANVPQTVPMRLRKLKLPDSFFKPPPEPKSHSRQASTDAGTAGALTPQHVRHSSPASLQLGAVSPG  
TLSPSGVVSGPGAAPTQHLRQSSFEIPDDVPLPAGWEMAKTSSGQRYFLNHIDQTTTWQDPRKAMLSQMNVTA  
TSPPVQQNIMNSASGPLPDGWEQAMTQDGEIYYINHKNKTTSWLDPRLDPRFAMNQRISSAPVKQPPPLAPQSP  
QGGVMGGGSSNQQQMRLQQLQMEKERLRLKHQELLRQALRNVPSTANSPPKRQEIARSQLPTEQDGGTQNPV  
SSPGMNQELRTMTTNSDPFLNSGTYHSRDESTDSGLSMSSYSVPRTPDFFLNSVDEMDTGDSISQSNIPS  
QQNRFPDYLEAIPGTNVDLGTLEGDGMNIEGEELMPSLQEQALSSDILNDMESVLAATKLDKESFLTWL  
PMRLRKLKLPDSFFKPP

rs:XP\_020851780 [XP\_020851780] transcriptional coactivator YAP1 isoform X5 [Phascolarctos cinereus]. 89..103

MDPGQQPPQAPSQGGQAPSQPPQGGQGPPTGPGQQAPPAGPSQAAPPPPPAGHQIVHVRGDSETDL  
EALFNAVMPKNTANVPQTVPMRLRKLKLPDSFFKPPPEPKSHSRQASTDAGTAGALTPQHVRHSSPASLQLGAVSPG  
TLSPSGVVSGPGAAPTQHLRQSSFEIPDDVPLPAGWEMAKTSSGQRYFLNHIDQTTTWQDPRKAMLSQMNVTA  
TSPPVQQNIMNSASGPLPDGWEQAMTQDGEIYYINHKNKTTSWLDPRLDPRFGKAMNQRISSAPVKQPPPLAPQ  
SPQGGVMGGGSSNQQQMRLQQLQMEKERLRLKHQELLRQVRPQEIARSQLPTEQDGGTQNPVSSPGMNQELR  
TMTTNSDPFLNSGTYHSRDESTDSGLSMSSYSVPRTPDFFLNSVDEMDTGDSISQSNIPSQQNRFPDYLEAIPG  
TNVDLGTLEGDGMNIEGEELMPSLQEQALSSDILNDMESVLAATKLDKESFLTWL PMRLRKLKLPDSFFKPP

rs:XP\_020851781 [XP\_020851781] transcriptional coactivator YAP1 isoform X6 [Phascolarctos cinereus]. 89..103

MDPGQQPPQAPSQGGQAPSQPPQGGQGPPTGPGQQAPPAGPSQAAPPPPPAGHQIVHVRGDSETDL  
EALFNAVMPKNTANVPQTVPMRLRKLKLPDSFFKPPPEPKSHSRQASTDAGTAGALTPQHVRHSSPASLQLGAVSPG  
TLSPSGVVSGPGAAPTQHLRQSSFEIPDDVPLPAGWEMAKTSSGQRYFLNHIDQTTTWQDPRKAMLSQMNVTA  
TSPPVQQNIMNSASGPLPDGWEQAMTQDGEIYYINHKNKTTSWLDPRLDPRFAMNQRISSAPVKQPPPLAPQSP  
QGGVMGGGSSNQQQMRLQQLQMEKERLRLKHQELLRQVRPQEIARSQLPTEQDGGTQNPVSSPGMNQELRTM  
TTNSDPFLNSGTYHSRDESTDSGLSMSSYSVPRTPDFFLNSVDEMDTGDSISQSNIPSQQNRFPDYLEAIPGTN  
VDLGTLEGDGMNIEGEELMPSLQEQALSSDILNDMESVLAATKLDKESFLTWL PMRLRKLKLPDSFFKPP

rs:XP\_020851782 [XP\_020851782] transcriptional coactivator YAP1 isoform X7 [Phascolarctos cinereus]. 89..103

MDPGQQPPQAPSQGGQAPSQPPQGGQGPPTGPGQQAPPAGPSQAAPPPPPAGHQIVHVRGDSETDL  
EALFNAVMPKNTANVPQTVPMRLRKLKLPDSFFKPPPEPKSHSRQASTDAGTAGALTPQHVRHSSPASLQLGAVSPG  
TLSPSGVVSGPGAAPTQHLRQSSFEIPDDVPLPAGWEMAKTSSGQRYFLNHIDQTTTWQDPRKAMLSQMNVTA  
TSPPVQQNIMNSASGPLPDGWEQAMTQDGEIYYINHKNKTTSWLDPRLDPRFGKAMNQRISSAPVKQPPPLAPQ

SPQGGVMGGGSSNQQQQMRLQQLQMEKERLRLKHQELLRQEIALRSQLPTMEQDGGTQNPVSSPGMNQELRTMTT  
NSSDPFLNSGTYHSRDESTDSGLSMSSYSVPRTPDDFLNSVDEMMDTGDSISQSNIPSSQQRNRPDYLEAIPGTNVDL  
LGTLEGDGMNIEGEEELMPSLQEQALSSDILNDMESVLAATKLDKESFLTWL PMRLRKLKLPDSFFKPP

rs:XP\_020851783 [XP\_020851783] transcriptional coactivator YAP1 isoform  
X8 [Phascolarctos cinereus]. 89..103

MDPGQQPPQAPSQGGQAPSQPPQGGQGGPPTGPGQQAPPGAPGSQAAPPPPPAGHQIVHVRGDSETDL  
EALFNAVMPKNTANVPQTVPMRLRKLKLPDSFFKPPPEPKSHSRQASTDAGTAGALTPQHVRHSSPASLQLGAVSPG  
TLSPSGVSVSGPGAAPTQGHRLRQSSFEIPDDVPLPAGWEMAKTSSGQRYFLNHIDQTTTWQDPRKAMLSQMNVTA  
TSPPVQQNIMNSASGPLPDGWEQAMTQDGEIYYINHKNKTTSWLDPRLDPRFAMNQRISQSAPVKQPPPLAPQSP  
QGGVMGGGSSNQQQQMRLQQLQMEKERLRLKHQELLRQEIALRSQLPTMEQDGGTQNPVSSPGMNQELRTMTTNS  
SDPFLNSGTYHSRDESTDSGLSMSSYSVPRTPDDFLNSVDEMMDTGDSISQSNIPSSQQRNRPDYLEAIPGTNVDL  
LGTLEGDGMNIEGEEELMPSLQEQALSSDILNDMESVLAATKLDKESFLTWL PMRLRKLKLPDSFFKPP

rs:XP\_020851784 [XP\_020851784] transcriptional coactivator YAP1 isoform  
X9 [Phascolarctos cinereus]. 89..103

MDPGQQPPQAPSQGGQAPSQPPQGGQGGPPTGPGQQAPPGAPGSQAAPPPPPAGHQIVHVRGDSETDL  
EALFNAVMPKNTANVPQTVPMRLRKLKLPDSFFKPPPEPKSHSRQASTDAGTAGALTPQHVRHSSPASLQLGAVSPG  
TLSPSGVSVSGPGAAPTQGHRLRQSSFEIPDDVPLPAGWEMAKTSSGQRYFLNHIDQTTTWQDPRKAMLSQMNVTA  
TSPPVQQNIMNSASAMNQRISQSAPVKQPPPLAPQSPQGGVMGGGSSNQQQQMRLQQLQMEKERLRLKHQELLRQ  
VRPQALRNVPSTANSFKRQEQIALRSQLPTMEQDGGTQNPVSSPGMNQELRTMTTNSSDPFLNSGTYHSRDEST  
SGLSMSSYSVPRTPDDFLNSVDEMMDTGDSISQSNIPSSQQRNRPDYLEAIPGTNVDLGTLEGDGMNIEGEEELMPSL  
QEQALSSDILNDMESVLAATKLDKESFLTWL PMRLRKLKLPDSFFKPP

rs:XP\_020851785 [XP\_020851785] transcriptional coactivator YAP1 isoform  
X10 [Phascolarctos cinereus]. 89..103

MDPGQQPPQAPSQGGQAPSQPPQGGQGGPPTGPGQQAPPGAPGSQAAPPPPPAGHQIVHVRGDSETDL  
EALFNAVMPKNTANVPQTVPMRLRKLKLPDSFFKPPPEPKSHSRQASTDAGTAGALTPQHVRHSSPASLQLGAVSPG  
TLSPSGVSVSGPGAAPTQGHRLRQSSFEIPDDVPLPAGWEMAKTSSGQRYFLNHIDQTTTWQDPRKAMLSQMNVTA  
TSPPVQQNIMNSASAMNQRISQSAPVKQPPPLAPQSPQGGVMGGGSSNQQQQMRLQQLQMEKERLRLKHQELLRQ  
ALRNVPSTANSFKRQEQIALRSQLPTMEQDGGTQNPVSSPGMNQELRTMTTNSSDPFLNSGTYHSRDESTDSGLS  
MSSYSVPRTPDDFLNSVDEMMDTGDSISQSNIPSSQQRNRPDYLEAIPGTNVDLGTLEGDGMNIEGEEELMPSLQEQAL  
SSDILNDMESVLAATKLDKESFLTWL PMRLRKLKLPDSFFKPP

rs:XP\_020851786 [XP\_020851786] transcriptional coactivator YAP1 isoform  
X11 [Phascolarctos cinereus]. 89..103

MDPGQQPPQAPSQGGQAPSQPPQGGQGGPPTGPGQQAPPGAPGSQAAPPPPPAGHQIVHVRGDSETDL  
EALFNAVMPKNTANVPQTVPMRLRKLKLPDSFFKPPPEPKSHSRQASTDAGTAGALTPQHVRHSSPASLQLGAVSPG  
TLSPSGVSVSGPGAAPTQGHRLRQSSFEIPDDVPLPAGWEMAKTSSGQRYFLNHIDQTTTWQDPRKAMLSQMNVTA  
TSPPVQQNIMNSASAMNQRISQSAPVKQPPPLAPQSPQGGVMGGGSSNQQQQMRLQQLQMEKERLRLKHQELLRQ  
VRPQEQIALRSQLPTMEQDGGTQNPVSSPGMNQELRTMTTNSSDPFLNSGTYHSRDESTDSGLSMSSYSVPRTPD  
FLNSVDEMMDTGDSISQSNIPSSQQRNRPDYLEAIPGTNVDLGTLEGDGMNIEGEEELMPSLQEQALSSDILNDMESV  
LAATKLDKESFLTWL PMRLRKLKLPDSFFKPP

rs:XP\_020851787 [XP\_020851787] transcriptional coactivator YAP1 isoform  
X12 [Phascolarctos cinereus]. 89..103

MDPGQQPPQAPSQGGQAPSQPPQGGQGGPPTGPGQQAPPGAPGSQAAPPPPPAGHQIVHVRGDSETDL  
EALFNAVMPKNTANVPQTVPMRLRKLKLPDSFFKPPPEPKSHSRQASTDAGTAGALTPQHVRHSSPASLQLGAVSPG  
TLSPSGVSVSGPGAAPTQGHRLRQSSFEIPDDVPLPAGWEMAKTSSGQRYFLNHIDQTTTWQDPRKAMLSQMNVTA  
TSPPVQQNIMNSASAMNQRISQSAPVKQPPPLAPQSPQGGVMGGGSSNQQQQMRLQQLQMEKERLRLKHQELLRQ  
EQIALRSQLPTMEQDGGTQNPVSSPGMNQELRTMTTNSSDPFLNSGTYHSRDESTDSGLSMSSYSVPRTPD  
FLNSVDEMMDTGDSISQSNIPSSQQRNRPDYLEAIPGTNVDLGTLEGDGMNIEGEEELMPSLQEQALSSDILNDMESV  
LAATKLDKESFLTWL PMRLRKLKLPDSFFKPP

rs:XP\_020855991 [XP\_020855991] protein **FAM181A** [Phascolarctos  
cinereus].>rs:XP\_020855992 [XP\_020855992] protein **FAM181A** [Phascolarctos  
cinereus]. 118..132

MASDSEVKMLLNFVNLASSDIKAALDKSAPCRRSVDHRKYLQKQLKRFSQKYSRMPRCYPNRSGESHSK  
RGPEDGRCRTPSNGSTEKGPANPGMEENFPPEEQTLQEQIPEASRPDQVPMRKRQLPASFWEEPRAQSYSGGLDG

LSVHREVPAYEGKSKKRPE TLGSETAPLPASPRAEKESPKVPSASLMGRMSAWSCCPFYHGQPLYQSPGGLPQ  
SPVPGGLWRKSPSSPGEMGHFCKEPGSPSQKVYRPVVLKPIPTKPGVPPPIFNVFSYI  
PMRKRQLPASFWEEP

rs:XP\_020862376 [XP\_020862376] uncharacterized protein LOC110221959  
[Phascolarctos cinereus]. 215..229

MAAGVIRNLCDFRLQAPFHQPFLPSTGHRDPDFPETSEEEEEEDGEEEEEDGEKQVEDLELAGRSPGCQR  
SDQELGKGSTRPSPSSTEMTLQLLRFSELISCDIQKYFGQKTKDDDPDACNIYEDSRPPGKSARELYYADLMQIV  
QSGDQEDEDTDTVGLPRGFDCQARFISGRDRSQKLGPLVELFEYGLCQYARQVSDSRRLRLEKKYGHITPMHKKR  
KLPQSFWKEPAPSSLCLLNTSTPDFSDLNWTSDVVQELHVSVGGRELGRHALEMDQLEEA  
PMHKKRKLQSFWKEP

rs:XP\_021024695 [XP\_021024695] protein **FAM181B** [Mus caroli]. 215..229

MAVQAALLSSHPIPFPGFGGSADGLVSAFGSLDKGCCFEDDESAGSSAGALLSGSEGGDVREATRDLLSF  
IDSASSNIKLALDKPGKSKRKNHRKYLQKQIKRCSGLMGTAPPRPASPSAADAPAKRPPGAPTVAATPAHCKAAP  
RREATQAAAAASLQSRSLAALFDSL RHIPGGAEMAGGAEAVSVPSLGAASAAGDGAGTAVSSVALGTRKVPLRAR  
NLPPSFFTEPSRVGCGGASGVPSGQGVSLGDLEKGAEEVEFFELLAPDFGSGNDSGVLMAADPLDFPAGATVLR  
GPLELESGPFEPAMVGNLLYPEPWNTSPSCPQTKKPPLAGVRRGGVTLNEPVRLLYPTALDSLGGEDAPALASFTP  
FFPDCALPQPHQVSYDYSAGYSRAVYPSLWRPDGVWEAASGEEGGHPD PLRARNLPPSFFTEP

rs:XP\_021027507 [XP\_021027507] transcriptional coactivator YAP1 isoform  
X1 [Mus caroli]. 70..84

MEPAQQPPPQAPQGPAPPSVSPAGTPAAPPAPPAGHQVVHVRGDSETDLEALFNAVMPKNTANVPQTV  
PMRLRKL PDSFFKPPPEPKSHSRQASTDAGTAGALTPQHVRHSSPASLQLGAVSPGTLTASGVVSGPAATPAAQH  
LRQSSFEIPDDVPLPAGWEMAKTSSGQRYFLNHNDQTTTWQDPRKAMLSQLNVPAPASPAVPQTLMNSASGPLPD  
GWEQAMTQDGEVYYINHKNKTTSWLDPRLDPRFAMNQIRITQSAPVKQPPPLAPQSPQGGVVGSSNQQQIQIQ  
QLQMEKERLRLKQOELFRQAIRNINPSTANAPKCQELALRSQLPTLEQDGGTQNAVSSPGMSQELRTMTTNSSDP  
FLNSGTYHSRDESTDSGLSMSSYSIPRTDDFLNSVDEMDTGDTISQSTLPSQQSRFPDYLEALPGTNVDLGTLE  
GDAMNIEGEEMLPSLQEALSSEILDVESVLAATKLDKESFLTWL PMRLRKL PDSFFKPP

rs:XP\_021027508 [XP\_021027508] transcriptional coactivator YAP1 isoform  
X2 [Mus caroli]. 70..84

MEPAQQPPPQAPQGPAPPSVSPAGTPAAPPAPPAGHQVVHVRGDSETDLEALFNAVMPKNTANVPQTV  
PMRLRKL PDSFFKPPPEPKSHSRQASTDAGTAGALTPQHVRHSSPASLQLGAVSPGTLTASGVVSGPAATPAAQH  
LRQSSFEIPDDVPLPAGWEMAKTSSGQRYFLNHNDQTTTWQDPRKAMLSQLNVPAPASPAVPQTLMNSASGPLPD  
GWEQAMTQDGEVYYINHKNKTTSWLDPRLDPRFAMNQIRITQSAPVKQPPPLAPQSPQGGVVGSSNQQQIQIQ  
QLQMEKERLRLKQOELFRQELALRSQLPTLEQDGGTQNAVSSPGMSQELRTMTTNSSDPFLNSGTYHSRDESTDS  
GLSMSSYSIPRTDDFLNSVDEMDTGDTISQSTLPSQQSRFPDYLEALPGTNVDLGTLEGDAMNIEGEEMLPSLQ  
EALSSEILDVESVLAATKLDKESFLTWL PMRLRKL PDSFFKPP

rs:XP\_005068428 [XP\_005068428] protein **FAM181A** [Mesocricetus  
auratus].>tr:A0A1U7Q969\_MESAU [A0A1U7Q969] SubName: Full=protein **FAM181A**  
{ECO:0000313|RefSeq:XP\_005068428.1}; 129..143

MAADSDVKMLLNFNVLASSDIKAALDKSAPCRRSVDHRKYLQKQLKRFSQKYSRLPRGLPGRVTEPHLQ  
RAPEERPGQLPLHPCPESNPGGGGSYKEKALGTPFREELSKEQSFQGLNPEAARPGQVPMRKRQLPASFWEEP  
PTLSYPMGLEVGLAPREASLYENKKNCKGLGSLGPETAPLPMSPRVLADMDPLKMSGVSLVGSGLDAWSYCFQYH  
GQPVFVPSLPGVLPQGPVPSLGLWRKSPASPVEMAHFCKDQVSSGPKVYRPVVLKPIPTKAMPPIFNVFGYL  
PMRKRQLPASFWEEP

rs:XP\_005073995 [XP\_005073995] protein **FAM181B** [Mesocricetus  
auratus].>tr:A0A1U7QHD2\_MESAU [A0A1U7QHD2] SubName: Full=protein **FAM181B**  
{ECO:0000313|RefSeq:XP\_005073995.1}; 221..235

MAVQAALLSSHPIPFPGFGGSTDGLVSAFGSLDKGCCFEDDESAGAPAGALLSGSEGGDLREATRDLLSF  
IDSASSNIKLALDKPGKSKRKNHRKYLQKQIKRCSGLMGTAPPGPPSPSAGDAPAKRPPGAPGAPTVAAPAHCK  
ATPRREATQAAAAASLQSRSLAALFDSLHHPVGAEPAGGAVAVPVPLGGAAGAASAAGDGASTAGSSAAPGTRK  
VPLRARNLPPSFFTEPSRVGASGGCGPSSQGMSLGDLEKGAEEVEFFELLAPDFGAGNDTGVLAAEPLDAFP  
TGVLRGPLELESGPFEPAMMGNLLYPEPWSTSPSCPQPKPPLAGVRSVTLNEPVRLLYPTTLDSPGGEDTPAL  
ASFTPFPPDCALPPPQVSYDYSAGYSRAVYPSLWRSDGFWEAGSAGEDGAHPDPLRARNLPPSFFTEP

rs:XP\_021501540 [XP\_021501540] transcriptional coactivator YAP1 isoform X1 [Meriones unguiculatus]. 76..90

MEPAQQQPQPPPPQPAPQGPAPPSASAPPAGAPAAPPAPPAGHQVVHVRGDSETDLEALFNAVMPKTA  
NVPQTVPMRLRKLKLPDSFFKPPPEPKSHSRQASTDAGTAGALTPQHVAHSSPASLQLGAVSPGSLTPSGVVSGPAA  
TPAAQHLRQSSFEIPDDVPLPAGWEMAKTSSGQRYFLNHIDQTTTWQDPRKAMLSQLNVPAPAPASPAVPQTLMN  
SASGPLPDGWEQAMTQEGEVYYYINHKNKTTSWLDPRLDPRFGKAMNQRITQSAPVKQPPPLAPQSPQGGVVGSSN  
SNQQQQIQLQQLQMEKERLRLKQOELLQOVRPQAIRNINPSTANAPKCQELALRRQLPTLEQDGGTQNAVSSPGM  
SQELRTMTTNSSDPFLNSGTYHSRDESTDSGLSMSSYSVPRTPDFFLNSVDEMDTGDTINQSTLPSQQSRFPDYL  
EAIPTGTVNVDLGTLEGDAMNIEGEELMPSLQEQALSSDILNDMESVLAATKLDKESFLTWL  
PMRLRKLKLPDSFFKPP

rs:XP\_021501541 [XP\_021501541] transcriptional coactivator YAP1 isoform X2 [Meriones unguiculatus]. 76..90

MEPAQQQPQPPPPQPAPQGPAPPSASAPPAGAPAAPPAPPAGHQVVHVRGDSETDLEALFNAVMPKTA  
NVPQTVPMRLRKLKLPDSFFKPPPEPKSHSRQASTDAGTAGALTPQHVAHSSPASLQLGAVSPGSLTPSGVVSGPAA  
TPAAQHLRQSSFEIPDDVPLPAGWEMAKTSSGQRYFLNHIDQTTTWQDPRKAMLSQLNVPAPAPASPAVPQTLMN  
SASGPLPDGWEQAMTQEGEVYYYINHKNKTTSWLDPRLDPRFAMNQRITQSAPVKQPPPLAPQSPQGGVVGSSN  
QQQQIQLQQLQMEKERLRLKQOELLQOVRPQAIRNINPSTANAPKCQELALRRQLPTLEQDGGTQNAVSSPGMSQ  
ELRTMTTNSSDPFLNSGTYHSRDESTDSGLSMSSYSVPRTPDFFLNSVDEMDTGDTINQSTLPSQQSRFPDYLEA  
IPGTVNVDLGTLEGDAMNIEGEELMPSLQEQALSSDILNDMESVLAATKLDKESFLTWL PMRLRKLKLPDSFFKPP

rs:XP\_021501542 [XP\_021501542] transcriptional coactivator YAP1 isoform X3 [Meriones unguiculatus]. 76..90

MEPAQQQPQPPPPQPAPQGPAPPSASAPPAGAPAAPPAPPAGHQVVHVRGDSETDLEALFNAVMPKTA  
NVPQTVPMRLRKLKLPDSFFKPPPEPKSHSRQASTDAGTAGALTPQHVAHSSPASLQLGAVSPGSLTPSGVVSGPAA  
TPAAQHLRQSSFEIPDDVPLPAGWEMAKTSSGQRYFLNHIDQTTTWQDPRKAMLSQLNVPAPAPASPAVPQTLMN  
SASGPLPDGWEQAMTQEGEVYYYINHKNKTTSWLDPRLDPRFGKAMNQRITQSAPVKQPPPLAPQSPQGGVVGSSN  
SNQQQQIQLQQLQMEKERLRLKQOELLQOVRPQAIRNINPSTANAPKCQELALRRQLPTLEQDGGTQNAVSSPGMSQEL  
RTMTTNSSDPFLNSGTYHSRDESTDSGLSMSSYSVPRTPDFFLNSVDEMDTGDTINQSTLPSQQSRFPDYLEAIP  
GTNVDLGTLEGDAMNIEGEELMPSLQEQALSSDILNDMESVLAATKLDKESFLTWL PMRLRKLKLPDSFFKPP

rs:XP\_021501544 [XP\_021501544] transcriptional coactivator YAP1 isoform X4 [Meriones unguiculatus]. 76..90

MEPAQQQPQPPPPQPAPQGPAPPSASAPPAGAPAAPPAPPAGHQVVHVRGDSETDLEALFNAVMPKTA  
NVPQTVPMRLRKLKLPDSFFKPPPEPKSHSRQASTDAGTAGALTPQHVAHSSPASLQLGAVSPGSLTPSGVVSGPAA  
TPAAQHLRQSSFEIPDDVPLPAGWEMAKTSSGQRYFLNHIDQTTTWQDPRKAMLSQLNVPAPAPASPAVPQTLMN  
SASGPLPDGWEQAMTQEGEVYYYINHKNKTTSWLDPRLDPRFAMNQRITQSAPVKQPPPLAPQSPQGGVVGSSN  
QQQQIQLQQLQMEKERLRLKQOELLQOVRPQAIRNINPSTANAPKCQELALRRQLPTLEQDGGTQNAVSSPGMSQELRT  
MTTNSSDPFLNSGTYHSRDESTDSGLSMSSYSVPRTPDFFLNSVDEMDTGDTINQSTLPSQQSRFPDYLEAIPGT  
NVDLGTLEGDAMNIEGEELMPSLQEQALSSDILNDMESVLAATKLDKESFLTWLPMRLRKLKLPDSFFKPP

rs:XP\_021501545 [XP\_021501545] transcriptional coactivator YAP1 isoform X5 [Meriones unguiculatus]. 76..90

MEPAQQQPQPPPPQPAPQGPAPPSASAPPAGAPAAPPAPPAGHQVVHVRGDSETDLEALFNAVMPKTA  
NVPQTVPMRLRKLKLPDSFFKPPPEPKSHSRQASTDAGTAGALTPQHVAHSSPASLQLGAVSPGSLTPSGVVSGPAA  
TPAAQHLRQSSFEIPDDVPLPAGWEMAKTSSGQRYFLNHIDQTTTWQDPRKAMLSQLNVPAPAPASPAVPQTLMN  
SASGPLPDGWEQAMTQEGEVYYYINHKNKTTSWLDPRLDPRFGKAMNQRITQSAPVKQPPPLAPQSPQGGVVGSSN  
SNQQQQIQLQQLQMEKERLRLKQOELLQOELALRRQLPTLEQDGGTQNAVSSPGMSQELRTMTTNSSDPFLNSGT  
YHSRDESTDSGLSMSSYSVPRTPDFFLNSVDEMDTGDTINQSTLPSQQSRFPDYLEAIPGTVNVDLGTLEGDAMNI  
EGEELMPSLQEQALSSDILNDMESVLAATKLDKESFLTWL PMRLRKLKLPDSFFKPP

rs:XP\_021501546 [XP\_021501546] transcriptional coactivator YAP1 isoform X6 [Meriones unguiculatus]. 76..90

MEPAQQQPQPPPPQPAPQGPAPPSASAPPAGAPAAPPAPPAGHQVVHVRGDSETDLEALFNAVMPKTA  
NVPQTVPMRLRKLKLPDSFFKPPPEPKSHSRQASTDAGTAGALTPQHVAHSSPASLQLGAVSPGSLTPSGVVSGPAA  
TPAAQHLRQSSFEIPDDVPLPAGWEMAKTSSGQRYFLNHIDQTTTWQDPRKAMLSQLNVPAPAPASPAVPQTLMN  
SASGPLPDGWEQAMTQEGEVYYYINHKNKTTSWLDPRLDPRFAMNQRITQSAPVKQPPPLAPQSPQGGVVGSSN  
QQQQIQLQQLQMEKERLRLKQOELLQOELALRRQLPTLEQDGGTQNAVSSPGMSQELRTMTTNSSDPFLNSGT  
YHSRDESTDSGLSMSSYSVPRTPDFFLNSVDEMDTGDTINQSTLPSQQSRFPDYLEAIPGTVNVDLGTLEGDAMNI

SRDESTDSGLSMSSYSVPRTPDDFLNSVDEMDTGDITINQSTLPSQQSRFPDYLEAIPGTNVDLGTLEGDAMNIEG  
EELMPSLQEQALSSDILNDMESVLAATKLDKESFLTWL PMRLRKLPSDFKPP

rs:XP\_021505112 [XP\_021505112] protein **FAM181A** [Meriones unguiculatus].  
129..143

MAADSDVKMLLNFNVLASSDIKAALDKSAPCRRSVDHRKYLQKQLKRFSQKYSRLPRGLPGRVAEPHLQ  
RGPEERPGQLPLHACPESSPGGGGNHAEKALGTPFGEECLSKESQFRGLNPEAARPGQVPMRKRQLPASFWEEP  
PTLSYPMGLEVGLAPREASLYENKKNCKGLES LGPETAPLPMSPRVLADTEPLKMGVSLVGS LDAWSYCPFQYH  
GQPVFPSLPGVLPQGPVPLGLLWRKSPTSPVELAHFCKD VDSPGPKVYRPVVLKPIPTKPAMPPP I FNVFYGL  
PMRKRQLPASFWEEP

rs:XP\_021513741 [XP\_021513741] protein **FAM181B** [Meriones unguiculatus].  
218..232

MAVQAALLSSHFFIPFGFGGPADGLVSAFGLDKGCCFEDEESSGGSAGALLSGSEGGDVREATRDLLESF  
IDSASSNIKALDLKPGKSKRKNVHRKYLQKQIKRCSGLMGTAPPPPPSPSAPDAPARRPPGPPGAPAVAAPAHCK  
AAPRREATQAAAAASLQSRSLAALFDSL RHVPGAETAGGAVAASVPGLGAASSAGDAGTAGSLAGPGTKKVPL  
RARNLPPSFFTEPSRVGGGGCGPSGQGVSLGDLEKGAEEVEFFELLAPDFGAGNDAGVLLASDPLDTFPAGAAV  
LRGPLELESGPFEPAMGGNLLYPEPWNAPSCPQTKKPAPAGVRRGGVTLNEPVRLLYPTALDSPGGEDAPALASF  
TPFFPDCALPPP HQVSYDYSTGYSRAVYPSLWRPDGACWEGASGEEGAHPD PLRARNLPPSFFTEP

rs:XP\_021194051 [XP\_021194051] transcriptional coactivator YAP1 isoform  
X1 [Helicoverpa armigera].>tr:A0A2W1BLM6\_HELAM [A0A2W1BLM6] SubName:  
Full=Uncharacterized protein {ECO:0000313|EMBL:PZC75181.1}; 44..58

MALNSDAEQKSNLVL RVDQDSDSVLQSLFDTVLKPD SKRPLQVPLRMRQLPKSFFNPPSTGSKSPSVSH  
SRENSADSAFGSSSATGASPVSHSRAHSSPASLQQT YAAGQONQOPPLHHQHTKQRSYDVGTHIPDDLGLPLPPGW  
EQARTPEGQIYYLNHITKTTTWDDPRKTLAAQSVAGSVQH QSTDALLTQAASPQNIPSTPAPAAKSTSSNTTTDPL  
LGPLPEGWEQAATAEGEIYFINHAARTTSWFDPRIPQHLQRTPAAGGAVPDGGWANASLQACQQKLR LQSLQLER  
ERLKQRQQEIRLQQELIMARQSSSIVSSLANSTGVASTDLPLDPFLSGLSDHQ RQESADSGLGMVPHSYMPHT  
PEGFLAGMDDRM DCTSEAGANIDSTDITLADNLDSTDDLVP SLQLNEFTNDILLDDVQSLINSTPSKPDNVL TWL  
PLRMRQLPKSFFNPP

rs:XP\_021194052 [XP\_021194052] transcriptional coactivator YAP1 isoform  
X2 [Helicoverpa armigera]. 44..58

MALNSDAEQKSNLVL RVDQDSDSVLQSLFDTVLKPD SKRPLQVPLRMRQLPKSFFNPPSTGSKSPSVSH  
SRENSADSAFGSSSATGASPVSHSRAHSSPASLQQT YAAGQONQOPPLHHQHTKQRSYDVGTHIPDDLGLPLPPGW  
EQARTPEGQIYYLNHITKTTTWDDPRKTLAAQSVAGSVQH QSTDALLTQAASPQNIPSTPAPAAKSTSSNTTTDPL  
GPLPEGWEQAATAEGEIYFINHAARTTSWFDPRIPQHLQRTPAAGGAVPDGGWANASLQACQQKLR LQSLQLER  
RLKQRQQEIRLQQELIMARQSSSIVSSLANSTGVASTDLPLDPFLSGLSDHQ RQESADSGLGMVPHSYMPHT  
EGFLAGMDDRM DCTSEAGANIDSTDITLADNLDSTDDLVP SLQLNEFTNDILLDDVQSLINSTPSKPDNVL TWL  
PLRMRQLPKSFFNPP

rs:XP\_021194053 [XP\_021194053] transcriptional coactivator YAP1 isoform  
X3 [Helicoverpa armigera].>tr:A0A0S2I7P5\_HELAM [A0A0S2I7P5] SubName:  
Full=Yorkie {ECO:0000313|EMBL:AL018798.1};>gp:KT153628\_1 [KT153628] yorkie  
[Helicoverpa armigera] 44..58

MALNSDAEQKSNLVL RVDQDSDSVLQSLFDTVLKPD SKRPLQVPLRMRQLPKSFFNPPSTGSKSPSVSH  
SRENSADSAFGSSSATGASPVSHSRAHSSPASLQQT YAAGQONQOPPLHHQHTKQRSYDVGTHIPDDLGLPLPPGW  
EQARTPEGQIYYLNHITKTTTWDDPRKTLAAQSVAGSVQH QSTDALLTQAASPQNIPSTPAPAAKSTSSNTTTDPL  
LGPLPEGWEQAATAEGEIYFINHAARTTSWFDPRIPQHLQRTPAAGGAVPDGGWANASLQACQQKLR LQSLQLER  
ERLKQRQQEIRLQQELIMARQSSSIVSSLANSTGVASTDLPLDPFLSGLSDHQ RQESADSGLGMVPHSYMPHT  
PEGFLAGMDDRM DCTSEAGANIDSTDITLADNLDSTDDLNEFTNDILLDDVQSLINSTPSKPDNVL TWL  
PLRMRQLPKSFFNPP

rs:XP\_021194054 [XP\_021194054] transcriptional coactivator YAP1 isoform  
X4 [Helicoverpa armigera]. 44..58

MALNSDAEQKSNLVL RVDQDSDSVLQSLFDTVLKPD SKRPLQVPLRMRQLPKSFFNPPSTGSKSPSVSH  
SRENSADSAFGSSSATGASPVSHSRAHSSPASLQQT YAAGQONQOPPLHHQHTKQRSYDVGTHIPDDLGLPLPPGW  
EQARTPEGQIYYLNHITKTTTWDDPRKTLAAQSVAGSVQH QSTDALLTQAASPQNIPSTPAPAQHLQRTPAAGGA  
VPDGGWANASLQACQQKLR LQSLQLERERLKQRQQEIRLQQELIMARQSSSIVSSLANSTGVASTDLPLDPFLSG

LSDHQRQESADSGLGMVPHSYMPHTPEGFLAGMDDRMDCSTSEAGANIDSTDITLADNLDSTDDLVPSSLQLINEF  
TNDILLDDVQSLINSTPSKPDNVLTWL PLRMRQLPKSFFNPP

rs:XP\_021194055 [XP\_021194055] WW domain-containing transcription  
regulator protein 1 isoform X5 [*Helicoverpa armigera*]. 44..58

MALNSDAEQKSNLVLVRVDQSDSVLQSLFDTVLKPDSCRPLQVPLRMRQLPKSFFNPPSTGSKSPSVSH  
SRENSADSAFGSSSATGASPVSHSRAHSSPASLQQTYAAGQQNQPPPLHHQHTKQRSYDVGTHIPDDLGLPLPPGW  
EQARTPEGQIYYLNHITKTTTWDDPRKTLAAQSVAGSVQHQSTDALLTQAASPQNIPTPAPAQHLQRTPAAGGA  
VPDGGWANASLQACQQKLRQLQLERERLKRQOEIRLQOQELIMARQSSSIVSSLANSTGVASTDLPLDPFLSG  
LSDHQRQESADSGLGMVPHSYMPHTPEGFLAGMDDRMDCSTSEAGANIDSTDITLADNLDSTDDLLENEFTNDIL  
LDDVQSLINSTPSKPDNVLTWL PLRMRQLPKSFFNPP

rs:XP\_022164255 [XP\_022164255] transcriptional coactivator YAP1-A [*Myzus  
persicae*]. 66..80

MSGLQQQQEQHQVSIKMEPTGPSSPTPAVNSNLVVRVDQNSSETDLQALFDTVLKPDGKKPLQLPLRM  
RQLPKSFFTPSSGSKSPSISHSRENSGDSAFGTNVGPGSCSGVPLHSRAHSSPASLQQTAVGAQKQQQHAKQ  
RSYDVSSAIDELGLPLQGWQARTPEGQIYYLNHLTRTTQWEDPRKSLAAQAANQHORSAEQLLSPGNDSGSSTN  
ATSTPTNSPPHIHSTLQGANKNVTLGPLPDGWEQAVTGDGETYFINHIARTTSWFDPRIPVHLQRAPTSGAVLPS  
GSASWLLNGASGLSQSLQVTQKLRRLHSLQLERERLKRQOEIRQOQLMLRSGQTNNDLDPFLSCSSSSVDHSR  
QESADSGLGLGNYSLPHTPEDFLSSNMDDNMDCTSESNDNPGSSDMSVVDVPEMSTLDVTDLVPSSLQLGDEFG  
NDILDEVQLLIDPNKPGSILTWL PLRMRQLPKSFFTPP

rs:XP\_021385006 [XP\_021385006] transcriptional coactivator YAP1 isoform  
X1 [*Lonchura striata domestica*]. 86..100

MDPGQPQTQQPPQAAQPPAPQQQQPPPPQPPGPVSGAPAGAAQPPGAGPPPAGHQIVHVRGDSETDLEAL  
FNAVMNPKGANVPHTLPMRLRKLKLPDSFFKPPPEPKAHSRQASTDAGTAGALTPQHVRHSSPASLQLGAVSPGTLT  
PSGVVTGPGAPSSQHLRQSSFEIPDDVPLPPGWEMAKTPSGQRYFLNHIDQTTTWQDPRKAMLSQMNVTAPTSPS  
VQQNIMNSASGPLPDGWEQAMTQDGEIYYINHKNTTSWLDPRLDPRFAMNQRIQSAPVKQPPPLAPQSPQGGV  
MGGSSSNQQQQMRLQQLQMEKERLRLKHQELLRQALRNINPSTANSPKHQELALRSQLPTEQDGGSQNPVSSPG  
MSQELRTMTTNSDPPFLNSGTYHSRDESTDSGLSMSSYSVPRTPDDFLNSVDEMMDTGD SIGQSNIPSHQNRFPDY  
LEAIPGTNVDLGTLEGDGMNIEGEELMPSLQEQALSSDILNDMESVLAATKLDKESFLTWL  
PMRLRKLKLPDSFFKPP

rs:XP\_021385008 [XP\_021385008] transcriptional coactivator YAP1 isoform  
X2 [*Lonchura striata domestica*]. 86..100

MDPGQPQTQQPPQAAQPPAPQQQQPPPPQPPGPVSGAPAGAAQPPGAGPPPAGHQIVHVRGDSETDLEAL  
FNAVMNPKGANVPHTLPMRLRKLKLPDSFFKPPPEPKAHSRQASTDAGTAGALTPQHVRHSSPASLQLGAVSPGTLT  
PSGVVTGPGAPSSQHLRQSSFEIPDDVPLPPGWEMAKTPSGQRYFLNHIDQTTTWQDPRKAMLSQMNVTAPTSPS  
VQQNIMNSASGPLPDGWEQAMTQDGEIYYINHKNTTSWLDPRLDPRFAMNQRIQSAPVKQPPPLAPQSPQGGV  
MGGSSSNQQQQMRLQQLQMEKERLRLKHQELLRQVPRQELALRSQLPTEQDGGSQNPVSSPGMSQELRTMTTNS  
SDPFLNSGTYHSRDESTDSGLSMSSYSVPRTPDDFLNSVDEMMDTGD SIGQSNIPSHQNRFPDYLEAIPGTNVDLG  
TLEGDGMNIEGEELMPSLQEQALSSDILNDMESVLAATKLDKESFLTWL PMRLRKLKLPDSFFKPP

rs:XP\_021385009 [XP\_021385009] transcriptional coactivator YAP1 isoform  
X3 [*Lonchura striata domestica*]. 86..100

MDPGQPQTQQPPQAAQPPAPQQQQPPPPQPPGPVSGAPAGAAQPPGAGPPPAGHQIVHVRGDSETDLEAL  
FNAVMNPKGANVPHTLPMRLRKLKLPDSFFKPPPEPKAHSRQASTDAGTAGALTPQHVRHSSPASLQLGAVSPGTLT  
PSGVVTGPGAPSSQHLRQSSFEIPDDVPLPPGWEMAKTPSGQRYFLNHIDQTTTWQDPRKAMLSQMNVTAPTSPS  
VQQNIMNSASGPLPDGWEQAMTQDGEIYYINHKNTTSWLDPRLDPRFAMNQRIQSAPVKQPPPLAPQSPQGGV  
MGGSSSNQQQQMRLQQLQMEKERLRLKHQELLRQELALRSQLPTEQDGGSQNPVSSPGMSQELRTMTTNSDPP  
LNSGTYHSRDESTDSGLSMSSYSVPRTPDDFLNSVDEMMDTGD SIGQSNIPSHQNRFPDYLEAIPGTNVDLGTLEG  
DGMNIEGEELMPSLQEQALSSDILNDMESVLAATKLDKESFLTWL PMRLRKLKLPDSFFKPP

rs:XP\_021396967 [XP\_021396967] protein **FAM181A** [*Lonchura striata  
domestica*]. 121..135

MASDSEVKTLLNFVNLASSDIKAALDKSAPCRRSVDHRKYLQKQLKRFSQKYSRIPRCHPSKAPECGWR  
RGAEDRARGPQPEAPEPSPHKVVTAEAEESLTGERVLQEQKPEAARPDQVPMRKRQLPASFWEEPRPAQSLAAR  
AFAASPEGLQAPRDPYEGKSKRSPDAAGPESPPDSAPHAGEKEPAGPLSGRVGAWTCCFPFCPGPGVYQPPG

ALPPSPFPGLGLWRKSAATLPAEVPHFCKEADGQGQKLYRPMVLKPIPTKPAIPPLFNVVFGYL  
PMRKRQLPASFWEEP

rs:XP\_021400626 [XP\_021400626] protein **FAM181B** [Lonchura striata  
domestica]. 142..156

MAVPAALLSPHLLSFCFPAAGGLLYADLEKGYEGGGDAGDFREATRDLLSFIDSASSNIKLALDRP  
VKSRRKVNHRKYLQKQIKRGTGIIAAAAAGSSLQSRSLAALFGFLPRGRAAAGGAEPKAGGGEKAAGGPRKVPLR  
DRNLPPSFFTEPALPGPAARGPPAKEPEKGGGSAEAAEFFELLCEPYGALLPEHAAATDAFGGRLPAELGLEPGL  
YELPLPAGPHLLGGLLYPEPPWSPAAPCSPPRKAPAEPLRIYPGGAEPVPGGGGSEEPGGHLPAGFAPFFPEP  
PLPPPQPPYDYGGGYHRGGYPGL PLRDRNLPPSFFTEP

rs:XP\_021437345 [XP\_021437345] transcriptional coactivator YAP1  
[Oncorhynchus mykiss]. 45..59

MDPSQHNPAGHQIVHVRGDSETDLEALFNAVMPKNTIVPASVPMRMRKLPDSFFNPPEPKSHSRQAS  
TDAVTAGALAPHHVRAHSSPASLQLGAVSPLLGMVPAGAPPSNLRQSSYEIPDDMPLPPGWEVAQTTPSGQRYFLN  
HLDQSTTWLDRKALLQMNQAPPTSPVPVQQQNMSPASGLNQQRITQSAPGKQGSQLPSSPQSGGVMGGSNQIK  
LQQLQMEKERLRLKHQELLRTRPQELALRNQLPTSMEQDGGTLNVPVSSPGMGQDARIMTTNSNDFLNSGTYSR  
DESTDSGLSMSSYSVPRTPDDFLNSVDSVPRTPDDFLNSLDSVPRTPDDFLNGVDEMDTGDSLPVMGTQASRFP  
DYLDVIPGTDVLDLTLENKSMAVEGEELMPSLQEQALSSDILNDMESVLAATKMDKENFLTWL  
PMRMRKLPDSFFNPP

rs:XP\_021440594 [XP\_021440594] protein **FAM181A** [Oncorhynchus  
mykiss].>tr:A0A060WPV5\_ONCMY [A0A060WPV5] SubName: Full=Uncharacterized  
protein {ECO:0000313|EMBL:CDQ69413.1}; 158..172

MRILNRGHDFKDEEYNLHGLVWVWYGLKYLHCKMASADSDVKTLNLFVNASSDIKAALDKSAPCRRSV  
DHRKYLQKQLKRFSQKYARMPRCHTHRSTESSIAKDVVNKSSEYSLETIHPSTTRINEKGGSDAQDVENARMAQT  
PTVDSDNSKQEQVPMRKRQLPASFWEEPRLAQTNTDYLQYGWKKSQCIVIGINDVEKIKKAHEELTPSLLLCNRRG  
SVEKEPLKLDVASHNVNVCGFQYHGHVVFQSHIVVPQSAVGLWGKATVAETETPDITHRHKNYTHVVVKPIPI  
TKPTVPPSIFNVFGFI PMRKRQLPASFWEEP

rs:XP\_004534732 [XP\_004534732] transcriptional coactivator yorkie  
[Ceratitis capitata].>tr:W8BY76\_CERCA [W8BY76] SubName: Full=Protein yorkie  
{ECO:0000313|EMBL:JAC04303.1}; 61..75

MSLSKTVGSLNKGNVKEKERSTSKESNNLVVRIDQSDNNLQALFDSVLNPTESKCPLQVPFRMRQLPE  
SFFKPPATTSRSPSVAHSRANSADSAYDTGSQPNVSQGNISTGSITAVPATITQPQVTANRLAISHSRAHSSPAS  
LQQTYNVHIGNVMETGACIQDGIGAVYTAGGVTFPPGVNASSSVRMDQVDQSATKDAPNPIQTFHMKQRSYDVVS  
TIQLQNELGPLPPGWEQAKTNDGQIYYLNHTTKSTQWEDPRIQLKQQIFQDGLTHNVTLKNKESVNLADNLGPLP  
EGWEQAYTDSGDVYFINHVNRTTSWNDPRIQDFLQKPVKSQKPGPSWLNIOHIEKEQDYFKPSSEQNSLTRQNGN  
LQMDPFLSGDNHARQESSDSLSSNTFSTTTDLLPNIDDSMDCISESGSLNALSGIDCPDNLVSSLQLEDNIC  
NEMFSDVHNNLNASATKPDTLDWYKIN PFRMRQLPESFFKPP

rs:XP\_023171744 [XP\_023171744] transcriptional coactivator yorkie isoform  
X1 [Drosophila hydei]. 61..75

MSLSNKSNISEKEIDDEDMLSPTKISTNLVVRVNQSDDDNLQALFDSVLNPGDAKLPLQLPFRMRKLPN  
SFFNPPAPLHSRANSADSTYDGSQTNINKTAQPEIQPSLTQNPQSHSRLTIHFRARSSPASLQQNYNVRSRNES  
SANNNQGPAYPENSVDFASTANNIDLVDVINTCMGPGPDTSLATQTTIHKQRSYDVVSPIQLSQLGALPPGWE  
QAKTNDGQIYYLNHTSKTTQWEDPRIQFRQQQQRALTDRIKPNQVDTTKPTSASTIATHIGPLPDGWEQAVTES  
GDIYFINHIDRTTSWNDPRIQSGNLVLDLCPDNLVSSLQIGDNICSNIFNDTQAIINTPSSHKPDDLEWYKIN  
PFRMRKLPNSFFNPP

rs:XP\_023171745 [XP\_023171745] transcriptional coactivator yorkie isoform  
X2 [Drosophila hydei]. 61..75

MSLSNKSNISEKEIDDEDMLSPTKISTNLVVRVNQSDDDNLQALFDSVLNPGDAKLPLQLPFRMRKLPN  
SFFNPPAPLHSRANSADSTYDGSQTNINKTAQPEIQPSLTQNPQSHSRLTIHFRARSSPASLQQNYNVRSRNES  
SANNNQGPAYPENSVDFASTANNIDLVDVINTCMGPGPDTSLATQTTIHKQRSYDVVSPIQLSQLGALPPGWE  
QAKTNDGQIYYLNHTSKTTQWEDPRIQFRQQQQRALTDRIKPNESGLNVLDLCPDNLVSSLQIGDNICSNIFNDTQ  
AIINTPSSHKPDDLEWYKIN PFRMRKLPNSFFNPP



rs:XP\_014228517 [XP\_014228517] transcriptional coactivator YAP1-A [Trichogramma pretiosum]. 53..67  
MALNQESGGVGGVVKDEGSGKALVHVDNRNSES DLQALFDTVLKPNNSQPLTVPLRMRKLPDSFFNPPST  
GSKSPSISHSRENSADSAFGVNNAAA AVAAAAAQAQQNNGGGGGPGSTGPNSPANPAQIPAGLVVAHPRAHS  
SPASLQQTYSASAQQAQAAPQPQSVRHVVHQQKQRSYDVI STGVDDLGLPLPHGW EQARTPEGQIYFLNHVTRTTT  
WEDPRKTAANA AVAAA AVESAGKAANQAAAAAAAAAAAAAVSNNALGPLPHGW EQARTPEGEIYFINHQERT  
TSWFDPRIPSHLQRAPTSGAMLPTWQIQQQQQQQVPSAASVQNNQTVQACQQKMRHLHSLQMERERLQKORQQEIM  
RQQERMLLQSTTDAAMD PFLSGINEQHARQESADSGLG LGSAYS LPHTPEDFLANIDDNMDVTSEGT PMETPDGM  
SLGDNIDNTDDLVP SLQLGEDFSSDILEDVQSLINPVGNTTKPENILT WL PLRMRKLPDSFFNPP

rs:XP\_023348775 [XP\_023348775] transcriptional coactivator YAP1-like [Eurytemora affinis]. 46..60  
MAASVGPEKETNSKQVSIHIRESDSELQALFDIPLKGGQRPLQVPMRMRNFPPSFWQPPVLGSKSPSV  
HSRENLDNSCGPFPDPVAVSPQPPVGHHSRANSC PANLQTLAVSLQHQNHALQNHHLRQQSYDVGGGGDDLGP  
LPPGWEMAKAPNGQIYFMNHITKSTQWEDPRKAIQQQMLNQLNGTASPRSSAVSSPVPNGQQGV DLGLPQGW EQ  
SATPEGEMYFIHHLTKRTTWYDPRIP IHAQQVPLKQRQESTHAQAQKLQQEARLRRL ENERRVLQQKRAELNQFI  
TRQQQEKLEMMMRHTLSEGGTKLDPFLAQTNGDPHIRQESADSGLG MGSFPNLGTISED MGR LIIIFGTISED M  
RLNIIIFGTISED MGR LIIIFGTISED MGR LIIIFGTISED MGR LIIIFGTISED MGR LIIIFGTISED M  
FGTISED MGR LIIIFGTISED MGR MENMDTDLDTTLTDTNQQIQIQQQQGM DTEELIPTLP ELGEELSRDFINTIF  
NTNTPVENELT WL PMRMRNFPPSFWQPP

rs:XP\_023321344 [XP\_023321344] uncharacterized protein LOC111696052 [Eurytemora affinis]. 191..205  
MNKEKRKPKCKEMGEFDDGLLDLGDVSTDL EALGANDLEER GELNLDVEGESAPEYDYDSVSSPGGSTCS  
GPTYIRHSFGFPD VNRPLS QLSAGSPPTYPGPPSPLTHSLSQPI IILTKGLASRHKLPNQPYLDNYSNNQDSRKKK  
KKGLLRPEFSEFGQDIRGQQISGSKLTGVKLGTLTSTRNKS RKEPLPMKLRALPQSFQQPNLANPLPPGVSFST  
LPPLPGQEGELNHAPPVSAVAGSGAE EFLRERMSTANTDLLFSLFNSVSDSLGSGR KIQMVRGR  
PMKLRALPQSFQQP

rs:XP\_023484091 [XP\_023484091] protein **FAM181A** isoform X1 [Equus caballus]. 221..235  
MAKNVGTGRCLIGMLCIWRGAPDWPEGPPSSRDSVSIQPTRGLHNRLQPDARSSPAAPGRAQVRPVFP  
SGAASPPQNPPSSWKAPCRG PLVMASDS DVKMLLN FVN LASSDIKAALDKSAPCRRSVDHRKYLQKQLKRFSQKY  
SRLPRGLPGRGAEPHLKRGPE DRPGRLPLGAGQDSSPGGGGGCTEKALGNPYREECLSKEQTLQGQNPEAARPGQ  
VPMRKRQLPASFWEEP RPTH SYPLGLEGGLGPREGPPYEGKKHCKGLEPVGPETAPVPASPRA PAEKEPLKMPGV  
SLVGRVNAWSCCPFYHGQPIYPGPPGALPQSPVPSLGLWRKSPASPGELAHFCKDVDGPGQKVYRPVVLKPIPT  
KPAVPPPIFN VFGYL PMRKRQLPASFWEEP

rs:XP\_005605469 [XP\_005605469] protein **FAM181A** isoform X2 [Equus caballus].>rs:XP\_008538988 [XP\_008538988] PREDICTED: protein **FAM181A** isoform X1 [Equus przewalskii]. 159..173  
MVRPVFPGAASPPQNPPSSWKAPCRG PLVMASDS DVKMLLN FVN LASSDIKAALDKSAPCRRSVDHRK  
YLQKQLKRFSQKYSRLPRGLPGRGAEPHLKRGPE DRPGRLPLGAGQDSSPGGGGGCTEKALGNPYREECLSKEQTL  
LQGQNPEAARPGQVPMRKRQLPASFWEEP RPTH SYPLGLEGGLGPREGPPYEGKKHCKGLEPVGPETAPVPASPR  
APAEKEPLKMPGVSLVGRVNAWSCCPFYHGQPIYPGPPGALPQSPVPSLGLWRKSPASPGELAHFCKDVDGPGQ  
KVYRPVVLKPIPTKPAVPPPIFN VFGYL PMRKRQLPASFWEEP

rs:XP\_005605470 [XP\_005605470] protein **FAM181A** isoform X3 [Equus caballus].>rs:XP\_023484092 [XP\_023484092] protein **FAM181A** isoform X3 [Equus caballus].>rs:XP\_005605471 [XP\_005605471] protein **FAM181A** isoform X3 [Equus caballus]. 129..143  
MASDS DVKMLLN FVN LASSDIKAALDKSAPCRRSVDHRKYLQKQLKRFSQKYSRLPRGLPGRGAEPHLK  
RGPEDRPGRLPLGAGQDSSPGGGGGCTEKALGNPYREECLSKEQTLQGQNPEAARPGQVPMRKRQLPASFWEEP  
RPTH SYPLGLEGGLGPREGPPYEGKKHCKGLEPVGPETAPVPASPRAPAEKEPLKMPGVSLVGRVNAWSCCPFYH  
GQPIYPGPPGALPQSPVPSLGLWRKSPASPGELAHFCKDVDGPGQKVYRPVVLKPIPTKPAVPPPIFN VFGYL  
PMRKRQLPASFWEEP

rs:XP\_023619829 [XP\_023619829] protein **FAM181A** [Myotis lucifugus]. 129..143

MASDSVDMKLLNFVNLASSDIKAALDKSAPCRRSVDHRKYLQKQLKRFSQKYSRLPRGLPGRGAEPPLR  
RGPEDRPGRLPLNPGPDASPSGGGDCKEKALGNPYREECLSREQTLOGQNPGAARPGQVPMRKRQLPASFWEEP  
PTHSYVALEGLVGPREGPPYECKKHCRGLELFGPDMALIPMSPRALAEKEPPKLPVSVLGRVNAWSCCFQYH  
GQPIYPGPPGALPPGPVPSLGLWRKSPASPGELAHAKDVGPGQKVHRPVVLKPIPTKPAMPPPIFNVFGYL  
PMRKRQLPASFWEEP

rs:XP\_023603180 [XP\_023603180] protein **FAM181B** [Myotis lucifugus].  
163..177

MAVQAALLSTHPFVFPFGGGSPDGLGGAFGALDKGCCFEDDEPGMPAGALLAGTEGGDAREATRDLLSF  
IDSASSNIKLALDKPSKSKRKNVHRKYLQKQIKRCSGLMGAAPGPPSPGAADTPAKRALGTPGAQTAARALGVR  
EEMLPALRGTAAPGARKVPLRARNLPPSFFTEPSRASGGGCGPSGCSVNLCDLEKGPETLEFLELLGPDYAGSE  
AGVLLPAEPLDVFTGATVLRGPPPELEPGLFEPPEPAMGGSLPYPEPWSAPACPATKKPSLAPPRGGSTLTEPLRL  
LYPAAVNSPGGEDGPGPLASFGPFFSDCVLPQPPPPQPRQVAYDVCAGYGRGTAYSSSLWRPDGLWEGDPGEEGAP  
RD PLRARNLPPSFFTEP

rs:XP\_003313276 [XP\_003313276] protein **FAM181B** [Pan  
troglodytes].>tr:H2R532\_PANTR [H2R532] SubName: Full=**FAM181B** isoform 1  
{ECO:0000313|EMBL:PNI56970.1}; SubName: Full=Family with sequence  
similarity 181 member B {ECO:0000313|Ensembl:ENSPTRP00000047762};  
221..235

MAVQAALLSTHPFVFPFGGGSPDGLGGAFGALDKGCCFEDDETGAAPAGALLSGAEGGDVREATRDLLSF  
IDSASSNIKLALDKPGKSKRKNVHRKYLQKQIKRCSGLMGAAPPSPSAADTPAKRPLAAPSAPTVAAPAHGK  
AAPPREASQAAAAASLQSRSLAALFDSLHRVPGGAEPAGGEVAAPAAGLGGAGTGGAGGDVAGPAGATAIPGARK  
VPLRARNLPPSFFTEPSRAGGGGCGPSGPDVSLGDLEKGAEEVEFFELLGPDYAGTEAAVLLAAEPLDVFPAGA  
SVLRGPPPELEPGLFEPPEPAAVGNLLYPEPWSVPGCPPTKKSPLTAPRGGLTLNEPLRPLYPAAADSPPGGEDGPGP  
LASFAPFFPDICALPPPPPPHQQVSYDYSAGYSRTAYSSSLWRSDDGVWEGAPGEEGAHRD PLRARNLPPSFFTEP

rs:XP\_016777355 [XP\_016777355] transcriptional coactivator YAP1 isoform  
X9 [Pan troglodytes].>rs:NP\_001269028 [NP\_001269028] transcriptional  
coactivator YAP1 isoform 7 [Homo sapiens].>tr:A0A2I3RHJ4\_PANTR [A0A2I3RHJ4]  
SubName: Full=YAP1 isoform 3 {ECO:0000313|EMBL:PNI44637.1}; SubName:  
Full=Yes associated protein 1 {ECO:0000313|Ensembl:ENSPTRP00000064130};  
85..99

MDPGQQPPPPQAPQGGQPPSQQPPQGGQPPSGPGQPAPAATQAAPQAPPAGHQIVHVRGDSETDLEALF  
NAVMPKPTANVPQTVPMRLRKLKLPDSFFKPPPEPKSHSRQASTDAGTAGALTPQHVRHSSPASLQLGAVSPGTLTP  
TGVVSGPAATPTAQHLRQSSFEIPDDVPLPAGWEMAKTSSGQRYFLNHIDQTTTWQDPRKAMLSQMNVTAPTSPP  
VQQNMMNSASAMNQRIQSAPVKQPPPLAPQSPQGGVMGGSNSNQQQMRLQQLQMEKERLRLKQQEQLLRQVRPQ  
AMRNINPSTANSPKCQELALRSQLEQDGGTQNPVSSPGMSQELRTMTTNSSDPFLNSGTYHSRDESTDSGLS  
MSSYSVPRTPDDFLNSVDEMDDTGTINQSTLPSQQNRFPDYLEAIPGTNVDLGTLEGDMNIEGEEELMPSLQEQAL  
SSDILNDMESVLAATKLDKESFLTWL PMRLRKLKLPDSFFKPP

rs:XP\_016777356 [XP\_016777356] transcriptional coactivator YAP1 isoform  
X10 [Pan troglodytes].>rs:NP\_001269026 [NP\_001269026] transcriptional  
coactivator YAP1 isoform 6 [Homo sapiens].>gp:AB567720\_1 [AB567720] yes-  
associated protein beta [Homo sapiens] 85..99

MDPGQQPPPPQAPQGGQPPSQQPPQGGQPPSGPGQPAPAATQAAPQAPPAGHQIVHVRGDSETDLEALF  
NAVMPKPTANVPQTVPMRLRKLKLPDSFFKPPPEPKSHSRQASTDAGTAGALTPQHVRHSSPASLQLGAVSPGTLTP  
TGVVSGPAATPTAQHLRQSSFEIPDDVPLPAGWEMAKTSSGQRYFLNHIDQTTTWQDPRKAMLSQMNVTAPTSPP  
VQQNMMNSASAMNQRIQSAPVKQPPPLAPQSPQGGVMGGSNSNQQQMRLQQLQMEKERLRLKQQEQLLRQAMRN  
INPSTANSPKCQELALRSQLEQDGGTQNPVSSPGMSQELRTMTTNSSDPFLNSGTYHSRDESTDSGLSMSSY  
SVPRTPDDFLNSVDEMDDTGTINQSTLPSQQNRFPDYLEAIPGTNVDLGTLEGDMNIEGEEELMPSLQEQALSSDI  
LNDMESVLAATKLDKESFLTWL PMRLRKLKLPDSFFKPP

rs:XP\_016777357 [XP\_016777357] transcriptional coactivator YAP1 isoform  
X11 [Pan troglodytes].>rs:NP\_001269027 [NP\_001269027] transcriptional  
coactivator YAP1 isoform 5 [Homo sapiens].>tr:A0A024R3E4\_HUMAN [A0A024R3E4]  
SubName: Full=Yes-associated protein 1, 65kDa, isoform CRA\_b  
{ECO:0000313|EMBL:EAW67014.1}; 85..99

MDPGQQPPPPQAPQGGQPPSQQPPQGGQPPSGPGQPAPAATQAAPQAPPAGHQIVHVRGDSETDLEALF

NAVMPKNTANVPQTVPMRLRKLKLPDSFFKPPPEPKSHSRQASTDAGTAGALTPQHVRHSSPASLQLGAVSPGTLTP  
TGVVSGPAATPTAQHLRQSSFEIPDDVPLPAGWEMAKTSSGQRYFLNHIDQTTTWQDPRKAMLSQMNVTAPTSP  
VQQNMMNSASAMNQRISQSAPVKQPPPLAPQSPQGGVMGGSNSNQQQMRLQQLQMEKERLRLKQOELLRQVRPQ  
ELALRSQLPTLEQDGGTQNPVSSPGMSQELRTMTTNSSDPFLNSGTYHSRDESTDSGLSMSSYSVPRTPDDFLNS  
VDEMDTGDITINQSTLPSQQNRFPDYLEAIPGTNVDLGTLEGDGMNIEGEEMLPMSLQEQALSSDILNDMESVLAATK  
LDKESFLTWL PMRLRKLKLPDSFFKPP

rs:XP\_016777358 [XP\_016777358] transcriptional coactivator YAP1 isoform  
X12 [Pan troglodytes].>rs:NP\_006097 [NP\_006097] transcriptional coactivator  
YAP1 isoform 2 [Homo sapiens].>tr:K7BI95\_PANTR [K7BI95] SubName: Full=YAP1  
isoform 4 {ECO:0000313|EMBL:PNI44638.1}; SubName: Full=Yes-associated  
protein 1 {ECO:0000313|EMBL:JAA06372.1}; 85..99

MDPGQQPPQPAPQGGQPPSQPPQGGQPPSGPQPAPAATQAAPQAPPAGHQIVHVRGDSETDLEALF  
NAVMPKNTANVPQTVPMRLRKLKLPDSFFKPPPEPKSHSRQASTDAGTAGALTPQHVRHSSPASLQLGAVSPGTLTP  
TGVVSGPAATPTAQHLRQSSFEIPDDVPLPAGWEMAKTSSGQRYFLNHIDQTTTWQDPRKAMLSQMNVTAPTSP  
VQQNMMNSASAMNQRISQSAPVKQPPPLAPQSPQGGVMGGSNSNQQQMRLQQLQMEKERLRLKQOELLRQELAL  
RSQLPTLEQDGGTQNPVSSPGMSQELRTMTTNSSDPFLNSGTYHSRDESTDSGLSMSSYSVPRTPDDFLNSVDEM  
DTGDITINQSTLPSQQNRFPDYLEAIPGTNVDLGTLEGDGMNIEGEEMLPMSLQEQALSSDILNDMESVLAATKLDKE  
SFLTWL PMRLRKLKLPDSFFKPP

rs:XP\_014202427 [XP\_014202427] LOW QUALITY PROTEIN: protein **FAM181B** [Pan  
paniscus]. 99..113

MALLERGWAVLTSTSGVEEAQISDRSAQFSECEYHQDLQSRSLAALFDSLRLHVPGGAEPPXGGEEVAAPAA  
GLGGAGTGGAGGDVAGPAGATAIPGARKVPLRARNLPPSFFTEPSRAGGGGCGPSGPDVSLGDLEKGAEAVEFFE  
LLGPDYAGATEAAVLLAAEPLDVFPAGASVLRGPPELEPGLFEPVAVVGNLLYPEPWSVPGCPPTKKSPLTAPR  
GGLTLNEPLRPLYPAAADSPGGEDGPGHLASFAFPFFPCALPPPPPPHQQVSYDYSAGYSRTAYSSSLWRSDDGVWEG  
APGEEGAHRD PLRARNLPPSFFTEP

rs:XP\_008952023 [XP\_008952023] transcriptional coactivator YAP1 isoform  
X1 [Pan paniscus]. 13..27

MNPKTANVPQTVPMRLRKLKLPDSFFKPPPEPKSHSRQASTDAGTAGALTPQHVRHSSPASLQLGAVSPGT  
LTPTGVVSGPAATPTAQHLRQSSFEIPDDVPLPAGWEMAKTSSGQRYFLNHIDQTTTWQDPRKAMLSQMNVTAPT  
SPPVQNNMNSASGPLPDGWEQAMTQDGEIYYINHKNKTTSWLDPRLDPRFGKAMNQRISQSAPVKQPPPLAPQS  
PQGGVMGGSNSNQQQMRLQQLQMEKERLRLKQOELLRQVRPQAMRNINPSTANSPKCQELALRSQLPTLEQDGG  
TQNPVSSPGMSQELRTMTTNSSDPFLNSGTYHSRDESTDSGLSMSSYSVPRTPDDFLNSVDEMDTGDITINQSTLP  
SQNRFPDYLEAIPGTNVDLGTLEGDGMNIEGEEMLPMSLQEQALSSDILNDMESVLAATKLDKESFLTWL  
PMRLRKLKLPDSFFKPP

rs:XP\_014202459 [XP\_014202459] transcriptional coactivator YAP1 isoform  
X2 [Pan paniscus]. 13..27

MNPKTANVPQTVPMRLRKLKLPDSFFKPPPEPKSHSRQASTDAGTAGALTPQHVRHSSPASLQLGAVSPGT  
LTPTGVVSGPAATPTAQHLRQSSFEIPDDVPLPAGWEMAKTSSGQRYFLNHIDQTTTWQDPRKAMLSQMNVTAPT  
SPPVQNNMNSASGPLPDGWEQAMTQDGEIYYINHKNKTTSWLDPRLDPRFAMNQRISQSAPVKQPPPLAPQSPQ  
GGVMGGSNSNQQQMRLQQLQMEKERLRLKQOELLRQVRPQAMRNINPSTANSPKCQELALRSQLPTLEQDGGTQ  
NPVSSPGMSQELRTMTTNSSDPFLNSGTYHSRDESTDSGLSMSSYSVPRTPDDFLNSVDEMDTGDITINQSTLPSQ  
QNRFPDYLEAIPGTNVDLGTLEGDGMNIEGEEMLPMSLQEQALSSDILNDMESVLAATKLDKESFLTWL  
PMRLRKLKLPDSFFKPP

rs:XP\_008952024 [XP\_008952024] transcriptional coactivator YAP1 isoform  
X3 [Pan paniscus]. 13..27

MNPKTANVPQTVPMRLRKLKLPDSFFKPPPEPKSHSRQASTDAGTAGALTPQHVRHSSPASLQLGAVSPGT  
LTPTGVVSGPAATPTAQHLRQSSFEIPDDVPLPAGWEMAKTSSGQRYFLNHIDQTTTWQDPRKAMLSQMNVTAPT  
SPPVQNNMNSASGPLPDGWEQAMTQDGEIYYINHKNKTTSWLDPRLDPRFGKAMNQRISQSAPVKQPPPLAPQS  
PQGGVMGGSNSNQQQMRLQQLQMEKERLRLKQOELLRQAMRNINPSTANSPKCQELALRSQLPTLEQDGGTQNP  
VSSPGMSQELRTMTTNSSDPFLNSGTYHSRDESTDSGLSMSSYSVPRTPDDFLNSVDEMDTGDITINQSTLPSQQN  
RFPDYLEAIPGTNVDLGTLEGDGMNIEGEEMLPMSLQEQALSSDILNDMESVLAATKLDKESFLTWL  
PMRLRKLKLPDSFFKPP

rs:XP\_008952025 [XP\_008952025] transcriptional coactivator YAP1 isoform X4 [Pan paniscus]. 13..27

MNPKTANVPQTVPMRLRKLKLPDSFFKPPPEPKSHSRQASTDAGTAGALTPQHVRHSSPASLQLGAVSPGT  
LTPTGVVSGPAATPTAQHLRQSSFEIPDDVPLPAGWEMAKTSSGQRYFLNHIDQTTTWQDPRKAMLSQMNVTAPT  
SPPVQONMMNSASGPLPDGWEQAMTQDGEIYYINHKNKTTSWLDPRLDPRFGKAMNQRISQSAPVKQPPPLAQSPQ  
PQGGVMGGSNSNQQQQMRLQQLQMEKERLRLKQQEELLRQVRPQELALRSQLPTLEQDGGTQNPVSSPGMSQELRT  
MTTNSDDPFLNSGTYHSRDESTDSGLSMSSYSVPRTPDFFLNSVDEMDTGDTINQSTLPSQQNRFPDYLEAIPGT  
NVDLGTLEGDMNIEGEEELMPSLQEQALSSDILNDMESVLAATKLDKESFLTWLPMLRKLKLPDSFFKPP

rs:XP\_014202461 [XP\_014202461] transcriptional coactivator YAP1 isoform X5 [Pan paniscus]. 13..27

MNPKTANVPQTVPMRLRKLKLPDSFFKPPPEPKSHSRQASTDAGTAGALTPQHVRHSSPASLQLGAVSPGT  
LTPTGVVSGPAATPTAQHLRQSSFEIPDDVPLPAGWEMAKTSSGQRYFLNHIDQTTTWQDPRKAMLSQMNVTAPT  
SPPVQONMMNSASGPLPDGWEQAMTQDGEIYYINHKNKTTSWLDPRLDPRFAMNQRISQSAPVKQPPPLAQSPQ  
GGVMGGSNSNQQQQMRLQQLQMEKERLRLKQQEELLRQVRPQELALRSQLPTLEQDGGTQNPVSSPGMSQELRTMT  
TNSDDPFLNSGTYHSRDESTDSGLSMSSYSVPRTPDFFLNSVDEMDTGDTINQSTLPSQQNRFPDYLEAIPGTNV  
DLGTLEGDMNIEGEEELMPSLQEQALSSDILNDMESVLAATKLDKESFLTWLPMLRKLKLPDSFFKPP

rs:XP\_008952026 [XP\_008952026] transcriptional coactivator YAP1 isoform X6 [Pan paniscus]. 13..27

MNPKTANVPQTVPMRLRKLKLPDSFFKPPPEPKSHSRQASTDAGTAGALTPQHVRHSSPASLQLGAVSPGT  
LTPTGVVSGPAATPTAQHLRQSSFEIPDDVPLPAGWEMAKTSSGQRYFLNHIDQTTTWQDPRKAMLSQMNVTAPT  
SPPVQONMMNSASGPLPDGWEQAMTQDGEIYYINHKNKTTSWLDPRLDPRFGKAMNQRISQSAPVKQPPPLAQSPQ  
PQGGVMGGSNSNQQQQMRLQQLQMEKERLRLKQQEELLRQELALRSQLPTLEQDGGTQNPVSSPGMSQELRTMTN  
SSDPFLNSGTYHSRDESTDSGLSMSSYSVPRTPDFFLNSVDEMDTGDTINQSTLPSQQNRFPDYLEAIPGTNVDL  
GTLEGDMNIEGEEELMPSLQEQALSSDILNDMESVLAATKLDKESFLTWLPMLRKLKLPDSFFKPP

rs:XP\_014202462 [XP\_014202462] transcriptional coactivator YAP1 isoform X7 [Pan paniscus].>rs:XP\_011839777 [XP\_011839777] PREDICTED:  
transcriptional coactivator YAP1 isoform X1 [Mandrillus leucophaeus].  
13..27

MNPKTANVPQTVPMRLRKLKLPDSFFKPPPEPKSHSRQASTDAGTAGALTPQHVRHSSPASLQLGAVSPGT  
LTPTGVVSGPAATPTAQHLRQSSFEIPDDVPLPAGWEMAKTSSGQRYFLNHIDQTTTWQDPRKAMLSQMNVTAPT  
SPPVQONMMNSASGPLPDGWEQAMTQDGEIYYINHKNKTTSWLDPRLDPRFAMNQRISQSAPVKQPPPLAQSPQ  
GGVMGGSNSNQQQQMRLQQLQMEKERLRLKQQEELLRQELALRSQLPTLEQDGGTQNPVSSPGMSQELRTMTTNS  
DPFLNSGTYHSRDESTDSGLSMSSYSVPRTPDFFLNSVDEMDTGDTINQSTLPSQQNRFPDYLEAIPGTNVDLGT  
LEGDMNIEGEEELMPSLQEQALSSDILNDMESVLAATKLDKESFLTWLPMLRKLKLPDSFFKPP

rs:XP\_014202463 [XP\_014202463] transcriptional coactivator YAP1 isoform X8 [Pan paniscus]. 13..27

MNPKTANVPQTVPMRLRKLKLPDSFFKPPPEPKSHSRQASTDAGTAGALTPQHVRHSSPASLQLGAVSPGT  
LTPTGVVSGPAATPTAQHLRQSSFEIPDDVPLPAGWEMAKTSSGQRYFLNHIDQTTTWQDPRKAMLSQMNVTAPT  
SPPVQONMMNSASAMNQRISQSAPVKQPPPLAQSPQGGVMGGSNSNQQQQMRLQQLQMEKERLRLKQQEELLRQV  
RPQAMRNINPSTANSPKCQELALRSQLPTLEQDGGTQNPVSSPGMSQELRTMTTNSDDPFLNSGTYHSRDESTDS  
GLSMSSYSVPRTPDFFLNSVDEMDTGDTINQSTLPSQQNRFPDYLEAIPGTNVDLGTLEGDMNIEGEEELMPSLQ  
EALSSDILNDMESVLAATKLDKESFLTWLPMLRKLKLPDSFFKPP

rs:XP\_014202464 [XP\_014202464] transcriptional coactivator YAP1 isoform X9 [Pan paniscus]. 13..27

MNPKTANVPQTVPMRLRKLKLPDSFFKPPPEPKSHSRQASTDAGTAGALTPQHVRHSSPASLQLGAVSPGT  
LTPTGVVSGPAATPTAQHLRQSSFEIPDDVPLPAGWEMAKTSSGQRYFLNHIDQTTTWQDPRKAMLSQMNVTAPT  
SPPVQONMMNSASAMNQRISQSAPVKQPPPLAQSPQGGVMGGSNSNQQQQMRLQQLQMEKERLRLKQQEELLRQA  
MRNINPSTANSPKCQELALRSQLPTLEQDGGTQNPVSSPGMSQELRTMTTNSDDPFLNSGTYHSRDESTDSGLSM  
SSYSVPRTPDFFLNSVDEMDTGDTINQSTLPSQQNRFPDYLEAIPGTNVDLGTLEGDMNIEGEEELMPSLQEQALS  
SDILNDMESVLAATKLDKESFLTWLPMLRKLKLPDSFFKPP

rs:XP\_014202465 [XP\_014202465] transcriptional coactivator YAP1 isoform X10 [Pan paniscus]. 13..27

MNPKTANVPQTVPMRLRKLKLPDSFFKPPPEPKSHSRQASTDAGTAGALTPQHVRHSSPASLQLGAVSPGT

LTPTGVVSGPAATPTAQHLRQSSFEIPDDVPLPAGWEMAKTSSGQRYFLNHIDQTTTWQDPRKAMLSQMNVTAPT  
SPPVQONMMNSASAMNQIRISQSAPVKQPPPLAPQSPQGGVMGGSNSNQOQOQMRLLQQLQMEKERLRLKQQEELLRQV  
RPQELALRSQLPTLEQDGGTQNPVSSPGMSQELRTMTTNSSDPFLNSGTYHSRDESTDSGLSMSSYSVPRTPDDF  
LNSVDEMMDTGDITINQSTLPSQONRFPDYLEAIPGTNVDLGTLEGDGMNIEGEEELMPSLQEQALSSDILNDMESVLA  
ATKLDKESFLTWL PMRLRKLKLPDSFFKPP

rs:XP\_014202466 [XP\_014202466] transcriptional coactivator YAP1 isoform X11 [Pan paniscus]. 13..27

MNPKTANVPQTVPMRLRKLKLPDSFFKPPPEPKSHSRQASTDAGTAGALTPQHVRHSSPASLQLGAVSPGT  
LTPTGVVSGPAATPTAQHLRQSSFEIPDDVPLPAGWEMAKTSSGQRYFLNHIDQTTTWQDPRKAMLSQMNVTAPT  
SPPVQONMMNSASAMNQIRISQSAPVKQPPPLAPQSPQGGVMGGSNSNQOQOQMRLLQQLQMEKERLRLKQQEELLRQV  
LALRSQLPTLEQDGGTQNPVSSPGMSQELRTMTTNSSDPFLNSGTYHSRDESTDSGLSMSSYSVPRTPDDFLNSV  
DEMMDTGDITINQSTLPSQONRFPDYLEAIPGTNVDLGTLEGDGMNIEGEEELMPSLQEQALSSDILNDMESVLAATKL  
DKESFLTWL PMRLRKLKLPDSFFKPP

rs:XP\_003832850 [XP\_003832850] protein **FAM181A** isoform X1 [Pan paniscus].>rs:XP\_003832851 [XP\_003832851] protein **FAM181A** isoform X1 [Pan paniscus].>rs:XP\_008956482 [XP\_008956482] protein **FAM181A** isoform X1 [Pan paniscus]. 129..143

MASDSVVKMLLNFNVLASSDIKAALDKSAPCRRSVDHRKYLQKQLKRFSQKYSRLPRGLPGRAAEFYLK  
RGSEDRPRRLLLDLGPDSSPGGGGGCKEKLVRNPYREECLAKEQLPQRQHPEAAQPGQVPMRKRQLPASFWEEP  
PTHSYHVGLEGGLPREGPPYEGKKNCKGLEPLGPETTLPVMSPRALDEKEPLKMPGVSLVGRVNAWSCCFFQYH  
GQPIYPGPLGALPQSPVPSLGLWRKSPAFPGELAHLCCKDADGLGQKVCRPVVLKPIPTKPAVPPPIFNVFGYL  
PMRKRQLPASFWEEP

rs:XP\_008956483 [XP\_008956483] protein **FAM181A** isoform X2 [Pan paniscus].>rs:XP\_009426629 [XP\_009426629] protein **FAM181A** isoform X2 [Pan troglodytes].>tr:H2Q8U4\_PANTR [H2Q8U4] SubName: Full=**FAM181A** isoform 2 {ECO:0000313|EMBL:PNI97566.1}; SubName: Full=Family with sequence similarity 181 member A {ECO:0000313|Ensembl:ENSPTRP00000011369}; 191..205

MPLERSSGERNDAAHNTNHRPGEKRASTAKQVSSVPFLGAARHQQLPSSWKASCSCGLVMASDSV  
KMLLNFNVLASSDIKAALDKSAPCRRSVDHRKYLQKQLKRFSQKYSRLPRGLPGRAAEFYLKRGSEDRPRRLLLD  
LGPDSSPGGGGGCKEKLVRNPYREECLAKEQLPQRQHPEAAQPGQVPMRKRQLPASFWEEP  
PTHSYHVGLEGGLPREGPPYEGKKNCKGLEPLGPETTLPVMSPRALDEKEPLKMPGVSLVGRVNAWSCCFFQYH  
GQPIYPGPLGALPQSPVPSLGLWRKSPAFPGELAHLCCKDADGLGQKVCRPVVLKPIPTKPAVPPPIFNVFGYL  
PMRKRQLPASFWEEP

rs:XP\_015143248 [XP\_015143248] protein **FAM181A** [Gallus gallus].127..141

MASDSEVKTLLNFNVLASSDIKAALDKSAPCRRSVDHRKYLQKQLKRFSQKYSRVPRCHPTKPECGPR  
RGAEDRARSCQPEVDPDPGPHSGAATEKVLQAAEAESLTREQAVPEQNPNRDPQVPMRKRQLPASFWEEP  
RPPQSLPAGGFPPGPEGLPVPRDPPPFEGKSKRSQDTIGPESHEPALNAGEKDPTGVLSGRVGAWTCCPFPCPGPAV  
YQPPGTLPPSPFPGLGLWRKGTATLPAEAQPFCKDAEGTGQKLYRPVVLKPIPTKPTIPPPPIFNVFGYL  
PMRKRQLPASFWEEP

rs:XP\_022070041 [XP\_022070041] transcriptional coactivator YAP1-like isoform X1 [Acanthochromis polyacanthus].46..60

MDAHRGAPPAGQQIVHVRGDSQTELEALFSAVMNPSNSARQPSSVPMRMRKLKLPDSFFRQPEPRGHSRQA  
SSDGGVCGSLTPHHVRAHSSPASLPVNSLSTQAADVATTPIIIPDDVPLPHGWEMAKTATGQRYFLNHRDKTTTWH  
DPRLSQLQSAAAQHPISGPPVHAHSLSNPAPTTQPQNINPETGPLEGWEQAVTADGEVYIDHINKTTTWDPR  
LAQKMNPGLLGLAMQQRQEKERLRCKQGLPPQITSQEAGGRSQMSGMDHDSAQTLVPPLDVIRASNHEPTLN  
GAHSRNESTDSGLSVSSLPRSDHMLSSVDHMDTGESVEPPSMALQESMPVLPMSGEELMPCIPGLSSDLLMD  
METVLSGSHMDRDSLLTWL PMRMRKLKLPDSFFRQP

rs:XP\_022070042 [XP\_022070042] transcriptional coactivator YAP1-like isoform X2 [Acanthochromis polyacanthus].46..60

MDAHRGAPPAGQQIVHVRGDSQTELEALFSAVMNPSNSARQPSSVPMRMRKLKLPDSFFRQPEPRGHSRQA  
SSDGGVCGSLTPHHVRAHSSPASLPVNSLSTQAADVATTPIIIPDDVPLPHGWEMAKTATGQRYFLNHRDKTTTWH  
DPRLSQLQSAAAQHPISGPPVHAHSLSNPAPTTQPQNINPETAQKMNPGLLGLAMQQRQEKERLRCKQGLPPQIT

SQEAGGRSQMSGMDHDSRQAQTLVPPPLDVRIRASNHEPTLNGAHSRNESTDSGLSVSSLPRSTDHMLSSVDHMDT  
GESVEPPSMALQESMPVLPMSSEGEELMPCIEPEGLSSDLLMDMETVLSGSHMDRDSLLTWL  
PMRMRKLPDSFFRQP

rs:XP\_022084387 [XP\_022084387] uncharacterized protein LOC110975858  
[Acanthaster planci]. 167..181

MTLNACAYAGMPVYGNCNYSVCSVPWTEGSQSSNNLVHFVDLASSNIKHALDRPVRSRKVNHRKYLQKQ  
IKRRSQSQSGGLMGDQKVAQGIRDAAKSALSTEPGETPRAKYGTRSRETKAHLNVSQCKSLSAMFDLKALLHAE  
TSGADEDGAKVKHQRPVIGHEPVPLKRRNLVPSFFQEPDVSSLLLPHPREILSSLSVDFDFPSVSTSEEEEDDDIA  
LRDTIDWLCSTADLDQILNPLLDDEMRTAKAREERTATVSDTGHGEMGSGANGVLAGMQHGAFHDFEKEPSHDDV  
QQVQVIDPHGSNALEQWVGLDSAQPARNTGQLLYANTLHQHPNNVQQDNVTFTYNALEPNSTHYQSRIQKDSDTT  
NQVDIDEYFTGNNEGPRHEFVGGQLDSYGAHHRAQPPQTHYNFTPAQQQLCQGQSGCTSNPDMSPAMIAEMRQHI  
RQQDTHRSLTGGQSISTGGDRTLPTFPQAFMNEATPWSPSKDWS PLKRRNLVPSFFQEP

rs:XP\_022085540 [XP\_022085540] uncharacterized protein LOC110976517  
[Acanthaster planci]. 133..147

MAKVPPPTPCSHATNKRGPSAPLSGSSSEGENSDLEDIPSPCSSTSSGPIYVRPAGFNHHAQEIVQAV  
PFRSCRSVKLLKKIKKNALTTDNLPCQQGTFSQGFQNNNTNNNNVNRTAAPPSKAKQKPKKDFLPMKLRALPQSF  
QQPNVNAVPPGSMYTVLPPVCKTDPPSIAEITDTRPITPPSDSDEKESLAVVKSEKPERAKSTEKPPQDAAAL  
REGALDAAAVEVVKSKPPKPPRRRTVRSVASSADLLAKLFDGIENDKKAPVAPTAKRGRPKRESSPHHSKLLVN  
KDDPYMIDAVSDSLLPLLSIESSRQSVGPASHLSVSVKDGDKTLTLPALNVEQNYPAMLTELVKAL  
PMKLRALPQSFQQP

rs:XP\_022431572 [XP\_022431572] protein **FAM181A** isoform X1 [Delphinapterus  
leucas].>tr:A0A2Y9NJK0\_DELLE [A0A2Y9NJK0] SubName: Full=protein **FAM181A**  
isoform X1 {ECO:0000313|RefSeq:XP\_022431572.1};193..207

MLLRGSPCCPQPAISPPGRPRLECQTVLPLRENCQLRALPWSRQPPAEPSSWKAPCSSPLVMASDS  
DVKMLLNFNVLASSDIKAALDKSAPCRRSVDHRKYLQKQLKRFSQKYSRLPRGLPGRGAEPHLKRGSEDRPGRPL  
LDSGHSSSPGGGGCCKEKALGNPYREECLSKEQTLHGPDPEAARPGQVPMRKRQLPASFWEEPRTQSYVGLGEG  
GLGPREGLPYEGKKHCKGLEPLGPETAPVPASPRAPAEKEPLKMPGVSLVGRVNAWSCCFFQYHGQPIYPGPPGA  
LPQSPLPSLGLWRKSSASPGELAHFCKDVEGPGQKVYRPVVLKPIPTKAMPPPIFNVFGYL  
PMRKRQLPASFWEEP

rs:XP\_022431573 [XP\_022431573] protein **FAM181A** isoform X2 [Delphinapterus  
leucas].>tr:A0A2Y9NQF7\_DELLE [A0A2Y9NQF7] SubName: Full=protein **FAM181A**  
isoform X2 {ECO:0000313|RefSeq:XP\_022431573.1};174..188

MSVPRPRTLSRAEGCCQLRALPWSRQPPAEPSSWKAPCSSPLVMASDSVKMLLNFNVLASSDIKAA  
LDKSAPCRRSVDHRKYLQKQLKRFSQKYSRLPRGLPGRGAEPHLKRGSEDRPGRPLDSDGHSSSPGGGGCCKEKA  
LGNPYREECLSKEQTLHGPDPEAARPGQVPMRKRQLPASFWEEPRTQSYVGLGEGGLGPREGLPYEGKKHCKGL  
EPLGPETAPVPASPRAPAEKEPLKMPGVSLVGRVNAWSCCFFQYHGQPIYPGPPGALPQSPLPSLGLWRKSSAS  
GELAHFCKDVEGPGQKVYRPVVLKPIPTKAMPPPIFNVFGYL PMRKRQLPASFWEEP

rs:XP\_022431574 [XP\_022431574] protein **FAM181A** isoform X3 [Delphinapterus  
leucas].>rs:XP\_022431575 [XP\_022431575] protein **FAM181A** isoform X3  
[Delphinapterus leucas].>tr:A0A2Y9N9T5\_DELLE [A0A2Y9N9T5] SubName:  
Full=protein **FAM181A** isoform X3 {ECO:0000313|RefSeq:XP\_022431574.1,  
ECO:0000313|RefSeq:XP\_022431575.1};129..143

MASDSVKMLLNFNVLASSDIKAALDKSAPCRRSVDHRKYLQKQLKRFSQKYSRLPRGLPGRGAEPHLK  
RGSEDRPGRPLDSDGHSSSPGGGGCCKEKALGNPYREECLSKEQTLHGPDPEAARPGQVPMRKRQLPASFWEEP  
PTQSYVGLGEGGLGPREGLPYEGKKHCKGLEPLGPETAPVPASPRAPAEKEPLKMPGVSLVGRVNAWSCCFFQYH  
GQPIYPGPPGALPQSPLPSLGLWRKSSASPGELAHFCKDVEGPGQKVYRPVVLKPIPTKAMPPPIFNVFGYL  
PMRKRQLPASFWEEP

rs:XP\_022901306 [XP\_022901306] transcriptional coactivator YAP1-A isoform  
X1 [Onthophagus taurus]. 42..56

MALNPDESQKQVVRVDQDSETDLQALFDTVLKPDKRPLQVPWSMRKLPDSFFNPPSTGSKSINHSREN  
SVDSAFGSTTGTNNSATSTGATINPVQPVHRAHSSPASLQQTAVGQQQQQPAPAHHHIKQRSYDVATKTEDAT  
PLPPGWEQARTPEGQVYYLNHITRTTTWEDPRKTLATQAAAQQHQSAEQLLTTHQVTSPTQTNSTGVNGSSDVEL  
GPLPEGWEQAQTSEGEIYFINHQTRTTSWFDPRIQHVQRSQVGLGNQWVQGPVSPQSRCDKQSKLRLQLLQMERE

RLKQRQQEIRRQQELMMRGSSTELQMDPFLSSFTEHTRQESADSGLGMGTTLSPQTPEDFLENIDNMEVSSDS  
HTMDTPDISLSENIDSTDDLVPSSLHLGEEFPNIEDVQSLIRPENLIWL PWSMRKLPDSFFNPP

rs:XP\_022901308 [XP\_022901308] transcriptional coactivator YAP1-A isoform  
X2 [Onthophagus taurus]. 42..56

MALNPDESGKQVVRVDQDSETDLQALFDTVLKPDSCRPLQVPWSMRKLPDSFFNPPSTGSKSINHSREN  
SVDSAFGSTTGTNNSATSTGATINPVQPVHHRHSSPASLQQTAVGQQQQQPAPAHHHIKQRSYDVATKTEDAT  
PLPPGWEQARTPEGQVYYLNHITRTTTTWEDPRKTLATQAAAQQHQSAEQLLTTHQVTSPTQTNSTGVNGSSDVEL  
GPLPEGWEQAQTSEAQHVQRSQVLGNQWVQGPVSPQSRCDKQSKLRLQLLQMERERLKQRQQEIRRQQELMMRGS  
STELQMDPFLSSFTEHTRQESADSGLGMGTTLSPQTPEDFLENIDNMEVSSDSHTMDTPDISLSENIDSTDDL  
VPSLHLGEEFPNIEDVQSLIRPENLIWL PWSMRKLPDSFFNPP

rs:XP\_022901309 [XP\_022901309] transcriptional coactivator YAP1-A isoform  
X3 [Onthophagus taurus]. 42..56

MALNPDESGKQVVRVDQDSETDLQALFDTVLKPDSCRPLQVPWSMRKLPDSFFNPPSTGSKSINHSREN  
SVDSAFGSTTGTNNSATSTGATINPVQPVHHRHSSPASLQQTAVGQQQQQPAPAHHHIKQRSYDVATKTEDAT  
PLPPGWEQARTPEGQVYYLNHITRTTTTWEDPRKTLATQAAAQQHQSAEQLLTTHQVTSPTQTNSTGVNGSSDVEL  
GPLPEGWEQAQTSEGEIYFINHQTRTTTSWFDPRIPQHVQRSQVLGNQWVQGPVSPQSRCDKQSKLRLQLLQMERE  
RLKQRQQEIRRQQELMMRGSSTELQMDPFLSSFTEHTRQESADSGLGMYYFETHQQ PWSMRKLPDSFFNPP

rs:XP\_019689134 [XP\_019689134] protein **FAM181A** isoform X1 [Felis  
catus].>tr:M3WCW5\_FELCA [M3WCW5] SubName: Full=Family with sequence  
similarity 181 member A {ECO:0000313|Ensembl:ENSCAP00000009492};  
228..242

MLCIWRGAPDWPEGPPSAGDSSSIQPTRGLHDCFQPDARSSPATPGLAQVCRGEPARPRRRGARGRPAP  
SVSSVPSPGAASHEQNPPASWKAPCSGLLVMANDSDVKMLLNFNVLASSDIKAALDKSAPCRRSVDHRKYLQKQL  
KRFSQKYSRLPRGLPGRGAEPHLKRGPEDRPGRPLPLDSGRDSSPGGGGGCKEKALGNPYREECLSKEQTLQGQNP  
EAARPGQVPMRKRQLPASFWEEPRAHYSYPLGLEGGPGPREGPPYEGKKHCKGLEPLDPETAPVPASPAPAEKE  
PLKMSGVSLVGRVNAWSCCPFYHQPVYPPGPPGALPQSPVPGLSLWRKSPASPGELAHFCKDVGPGQKVYRVP  
VLKPIPTKPAVPPPIFNVFGYL PMRKRQLPASFWEEP

rs:XP\_019689135 [XP\_019689135] protein **FAM181A** isoform X2 [Felis catus].  
207..221

MLCIWRGAPDWPEGPPSAGDSSSIQPTRGLHDCFQPDARSSPATPGLAQVSSVPSPGAASHEQNPPASW  
KAPCSGLLVMANDSDVKMLLNFNVLASSDIKAALDKSAPCRRSVDHRKYLQKQLKRFSQKYSRLPRGLPGRGAEP  
HLKRGPEDRPGRPLPLDSGRDSSPGGGGGCKEKALGNPYREECLSKEQTLQGQNPAAARPGQVPMRKRQLPASFW  
EPRATHSYPLGLEGGPGPREGPPYEGKKHCKGLEPLDPETAPVPASPAPAEKEPLKMSGVSLVGRVNAWSCCPF  
QYHQPVYPPGPPGALPQSPVPGLSLWRKSPASPGELAHFCKDVGPGQKVYRVPVVLKPIPTKPAVPPPIFNVFGY  
L PMRKRQLPASFWEEP

rs:XP\_019689136 [XP\_019689136] protein **FAM181A** isoform X3 [Felis  
catus].>rs:XP\_019689137 [XP\_019689137] protein **FAM181A** isoform X3 [Felis  
catus].>rs:XP\_006933133 [XP\_006933133] protein **FAM181A** isoform X3 [Felis  
catus]. 129..143

MANDSDVKMLLNFNVLASSDIKAALDKSAPCRRSVDHRKYLQKQLKRFSQKYSRLPRGLPGRGAEPHLK  
RGPEDRPGRPLPLDSGRDSSPGGGGGCKEKALGNPYREECLSKEQTLQGQNPAAARPGQVPMRKRQLPASFWEEP  
ATHSYPLGLEGGPGPREGPPYEGKKHCKGLEPLDPETAPVPASPAPAEKEPLKMSGVSLVGRVNAWSCCPFYH  
QPVYPPGPPGALPQSPVPGLSLWRKSPASPGELAHFCKDVGPGQKVYRVPVVLKPIPTKPAVPPPIFNVFGYL  
PMRKRQLPASFWEEP

rs:XP\_023094775 [XP\_023094775] basic proline-rich protein-like [Felis  
catus]. 386..400

MGLLTQIPSEESGVRSSGVEGVRSLPSGLPGPHQVMARLQYPRLGPRVDPTPGPLSLLPLDSPDPALG  
PPPAPPPGPSRI RTWVRAPAPAPWI PRHAGPRAPRI PPTSAPAPPGFPRTRAPGVPPHPLGAARPPRLPGGRAR  
GRVTCGGPAGRAGRLQECGNSRAKVPARAGRGPAGGAEAGRAARRRGRRAARAGGSLNFSFGVGGEFLSQSGA  
AAAGGERGEEGRKELREQSGQRGRGAPAAPERSRRGRGARAGGAGSRVPPRPRERPEGRRRRPPPPPPRAEP  
SAASSGRRRAWTPGRRPHSPRPPAPRAPPPAQPQQGPPAPGPAAPPQPQPPAGHQIVHVRGDSETDLEAL  
FNAVMPKNTANVPQTVPMRLRKLPLDSFFKPEPKSHSRQVTGDGGAGGTGVPPPRVRRRGLPSLRGSRGGGLGG  
PPGGVQAFLEGAAGLARPRPGVGTQGAVRDSSGGTGLGGAAGPGGASAGGRRDLFPPAPRPDGRSVRSRGGDQPE

AGDTPPGECSHSDGLGPPLGVQGPEKLELLAKPRVRPERGTAASFVRGRPRCAVPPPPSLAWVEVCS DAGYFLR  
LESVTHSGR PMRLRKL PDSFFKPP

rs:XP\_012273110 [XP\_012273110] transcriptional coactivator YAP1 [Orussus abietinus]. 46..60

MALNQDVDQLSKSNLVVRIDQNSESDLQALFDSVLKPD SKRPLQVPLMRNL PDSFFNPPSTGSKSPSI  
SHSRENSADSAFGVAPPGVGGGSAAPGAATNGAAAAAAAAASAPGPPGAAAGPAQPPAAGPPTAAAAPGLTVAHP  
RAHSSPASLQQTYASAQQAPQHAPQPHARHHHHKQKORSYDVI STVDDLGLPLPHGWEQARTPEGQIYFLNHLTRTT  
TWEDPRKTA AAASVA AVAAVESGKTSSGATSSLGLPLDGWEQARTPEGEIYFINHQTRTTSWFDPRIPHTLQRA  
PTSGAMLPQNWLQPPGGGGI QSSQTLQACQQKLR LQSLQMERERL KQRQQEIMRQQELMLRQSTTDAAMPDFLSG  
INEQHARQESADSG LGLGSAYS LPHPTPEDFLANIDDNMDGTSEGGAPMETPDLSTLSL DLVPSLQLGEEFSSDILD  
DVQSLINPNTSKPENVTWL PLRMRNL PDSFFNPP

rs:XP\_023295046 [XP\_023295046] transcriptional coactivator yorkie isoform X1 [Lucilia cuprina].>tr:A0A0L0C8Y0\_LUCCU [A0A0L0C8Y0] SubName:  
Full=Protein yorkie {ECO:0000313|EMBL:KNC28868.1}; 65..79

MSLSKSSASDDASKCSVKTD DSTSAASKSSNNLVVHNYQNSDENLQILFDSVLNPS ESKRPLQVPLMR  
KLPNSFFTPPAASPKSPTVSHSRANSVDSAYDCG SQPNINQTSVATSLSDLQTAAAAAAAQASVQQQPATTINAQ  
QPPPPAAAGGTQADQ PRLQICH SRAHSSPASLQQTYNIHGGNIGDDSTAASFLQQQNAAGEVSN GGGGGGNSG  
PGFPGTLLSYNAAAAAAAAAAGINSNNILALGGTGGGAPYHMKORSYDVISPIQLQNELG PLPPGWEQAKTND  
GQIYYLNHTTKTTQWEDPRIQFKQQALNAAANARLNKKTATAAGVNLNGDLG PLPEGWEQAL TETGEVYFINHID  
RTTSWNDPRIPLLFQKEIKAKTEMSWVNATEIDKDTDIFKQKAGQSLNKHN VSLHMDPF LSGDNHARQESSDSG  
LSLSSNSFAVNPDFITHMDTSMDCISENGSIIDNLDTTLQLNDNICMLNDV LNSPLNKPDNLEWYKLN  
PLRMRKL PDSFFTPP

rs:XP\_023295048 [XP\_023295048] transcriptional coactivator yorkie isoform X2 [Lucilia cuprina]. 65..79

MSLSKSSASDDASKCSVKTD DSTSAASKSSNNLVVHNYQNSDENLQILFDSVLNPS ESKRPLQVPLMR  
KLPNSFFTPPAASPKSPTVSHSRANSVDSAYDCG SQPNINQTSVATSLSDLQTAAAAAAAQASVQQQPATTINAQ  
QPPPPAAAGGTQADQ PRLQICH SRAHSSPASLQQTYNIHGGNIGDDSTAASFLQQQNAAGEVSN GGGGGGNSG  
PGFPGTLLSYNAAAAAAAAAAGINSNNILALGGTGGGAPYHMKORSYDVISPIQLQNELG PLPPGWEQAKTND  
GQIYYLNHTTKTTQWEDPRIQFKQQALNAAANARLNKKTATAAGVNLNGDLG PLPEGWEQAL TETGEVYFINHID  
RTTSWNDPRIPLLFQKEIKAKTEMSWVNATEIDKDTDIFKQKAGQSLNKHN VSLHMDPF LSGDNHARQESSDSGL  
SLSSNSFAVNPDFITHMDTSMDCISENGSIIDNLDTTLQLNDNICMLNDV LNSPLNKPDNLEWYKLN  
PLRMRKL PDSFFTPP

rs:XP\_012668939 [XP\_012668939] transcriptional coactivator YAP1-like isoform X1 [Otolemur garnettii]. 85..99

MDPEQQPPLQ PAPQGRQPPAQNTQEQA PPSGLEQPAPSASKEAPQAPFAGHQIVCVQGDSESDLEALF  
NAVINPKTANVPQTVPMRLRKL PDSFFKPPEPKSCSPQASMDAGTAEDLTPQH VRAHSSPASL KLEAASP GTLTP  
TGVVSDPATTSTAQHLLQSSLEIPDDVPLPAGWEIAETSAGQKYFLNHTDHTTSWQDPREAMLLQMNATASTSP  
AQQNMMSASG PLPDGWEQAVTQDGEIYYINYNMTAPWLDPSLDPRFGKAVNQ RISSAPDEQPPPLTPQSPQA  
DVMGGSTSNQQQMR LQLQMEEE LLRLKQOELLWQ EVALHGH LPTLEQDSGTQTPVSSPRMFQELRTMTANSFN  
LFNGGAHHSRDESTDSGLSVSSCGVPRTPEDILNSVDEMDTDDSVNQNTLLTLQNHLDNDYLESIPGTSVDLGM  
AVALEGDEMYLEGEELMPNIQEA FNSDILNDMESVLAAAKLDKDSFLTWL PMRLRKL PDSFFKPP

rs:XP\_012668940 [XP\_012668940] transcriptional coactivator YAP1-like isoform X2 [Otolemur garnettii]. 85..99

MDPEQQPPLQ PAPQGRQPPAQNTQEQA PPSGLEQPAPSASKEAPQAPFAGHQIVCVQGDSESDLEALF  
NAVINPKTANVPQTVPMRLRKL PDSFFKPPEPKSCSPQASMDAGTAEDLTPQH VRAHSSPASL KLEAASP GTLTP  
TGVVSDPATTSTAQHLLQSSLEIPDDVPLPAGWEIAETSAGQKYFLNHTDHTTSWQDPREAMLLQMNATASTSP  
AQQNMMSASAVNQ RISSAPDEQPPPLTPQSPQADVMGGSTSNQQQMR LQLQMEEE LLRLKQOELLWQAMWSL  
SPSLANPPKCQ EVALHGH LPTLEQDSGTQTPVSSPRMFQELRTMTANSFNLLFNGGAHHSRDESTDSGLSVSSCG  
VPRTPEDILNSVDEMDTDDSVNQNTLLTLQNHLDNDYLESIPGTSVDLGMVALEGDEMYLEGEELMPNIQEA FN  
SDILNDMESVLAAAKLDKDSFLTWL PMRLRKL PDSFFKPP

rs:XP\_012668941 [XP\_012668941] transcriptional coactivator YAP1-like isoform X3 [Otolemur garnettii]. 85..99

MDPEQQPPLQ PAPQGRQPPAQNTQEQA PPSGLEQPAPSASKEAPQAPFAGHQIVCVQGDSESDLEALF



NAVINPKTANVPQTVPMRLRKLKLPDSFFKPPPEPKSCSPQASMDAGTAEDLTPQHVRHSSPASLKLEAASPGLTLP  
TGVVSDPATTSTAQHLQLSSLEIPDDVPLPAGWEIAETSAGQKYFLNHTDHTTSWQDPREAMLLQMNATASTSPP  
AQQNMMSASAVNQRISSAPDEQPPPLTPQSPQADVMGGSTSNQQQQMRLQLQMEEELLRLKQQELLWQVEVALH  
GHLPTLEQDSGTQTPVSSPRMFQELRTMTANSFNLLFNGGAHHSRDESTDSGLSVSSCGVPRTPEDILNSVDEMD  
TDDSVNQNTLLTLQNLNDYLESIPGTSVDLGMVALEGEDEMYLEGEELMPNIQEAFNSDILNDMESVLAALKD  
KDSFLTWL PMRLRKLKLPDSFFKPP

rs:XP\_010587122 [XP\_010587122] protein **FAM181A** [Loxodonta africana].  
130..144

MASDSVDMKLLNFVNLASSDIKAALDKSAPCRRSVDHRKYLQKQLKRFSQKYSRLPRGLPGRAAEPHLK  
RGPEDRLSRLPLDSHDPSPSGVGGCKEKALGNPGREECLSRQQEQTLQGNPEAAQPGQVPMRKRQLPASFWEEP  
RPAHSFPLGLEGGLGAREGPPYEGKKTCCQGLEPLGPETAPVPMSPRALAEKEPLKMPGVSLMGQVNAWSSCCPFQY  
HGQPIYPGPPGALPQGSVPNLGLWRTSPASTGELTPFCKDADGPGQKVYRPVVLKPIPTKPAVPPPIFNVFGYL  
PMRKRQLPASFWEEP

rs:XP\_023721985 [XP\_023721985] transcriptional coactivator YAP1 isoform  
X1 [Cryptotermes secundus]. 45..59

MALNPDSEQHKGNLVVRIDEDSDSDLQALFDSVLKPDSCRPLQVPLMRKLPNSFFNPPSTGSKSPSVS  
SISHSRENSADSAFGTASVGAGPGGTTTTASGASGLQVNHPRAHSSPASLQQTYASAQQQQHGHKLQRSYDITP  
VDELGPLPPGWAQARTPEGQVYYLNHITRTTTTWEDPRKTLAAQVTQSQQQQQQQQQQQQQTSADLISNVAGSPH  
SSTSPQPQGTKSVDASSLGLPEGWDQATTQEGEVYFINHQTRTTSWFDPRIPTAMWSRTAIPSLVQRMRLRLS  
ANHTLHLQKSPAGSLLPQQSTSWIQPLSAQSQVCQQIRLQSLQMERERLKLKQQEIMRQGMMLRQPSTTDLPPGP  
NSAGMDPFLSGLTDHSRQESADSLGMCNSYSLPHTPEDFLANMDDNMDGVSEGGNPTDMAALDGPDISSLSdni  
DSTDDLVPQLSEEFSSDILDDVQSLINPNSRPDNVLTWL PLMRKLPNSFFNPP

rs:XP\_023721986 [XP\_023721986] transcriptional coactivator yorkie isoform  
X2 [Cryptotermes secundus]. 45..59

MALNPDSEQHKGNLVVRIDEDSDSDLQALFDSVLKPDSCRPLQVPLMRKLPNSFFNPPSTGSKSPSVS  
SISHSRENSADSAFGTASVGAGPGGTTTTASGASGLQVNHPRAHSSPASLQQTYASAQQQQHGHKLQRSYDITP  
VDELGPLPPGWAQARTPEGQVYYLNHITRTTTTWEDPRKTLAAQVTQSQQQQQQQQQQQQQTSADLISNVAGSPH  
SSTSPQPQGTKSVDASSLGLPEGWDQATTQEGEVYFINHQTRTTSWFDPRIPTAMWSRTAIPSLVQRMRLRLS  
ANHTLHLQKSPAGSLLPQQSTSWIQPLSAQSQVCQQIRLQSLQMERERLKLKQQEIMRQGMMLRQPSTTDLPPGP  
NSAGMDPFLSGLTDHSRQESADSLGMCNSYSLPHTPEDFLANMDDNMDGVSEGGNPTDMAALDGPDISSLSdni  
DSTDDLVPQLQNCWKSPLHNHSLLRVMSLNTH PLMRKLPNSFFNPP

rs:XP\_023721987 [XP\_023721987] transcriptional coactivator YAP1 isoform  
X3 [Cryptotermes secundus]. 45..59

MALNPDSEQHKGNLVVRIDEDSDSDLQALFDSVLKPDSCRPLQVPLMRKLPNSFFNPPSTGSKSPSVS  
SISHSRENSADSAFGTASVGAGPGGTTTTASGASGLQVNHPRAHSSPASLQQTYASAQQQQHGHKLQRSYDITP  
VDELGPLPPGWAQARTPEGQVYYLNHITRTTTTWEDPRKTLAAQVTQSQQQQQQQQQQQQQTSADLISNVAGSPH  
SSTSPQPQGTKSVDASSLGLPEGWDQATTQEGEVYFINHQTRTTSWFDPRIPLHLQKSPAGSLLPQQSTSWIQP  
LSAQSQVCQQIRLQSLQMERERLKLKQQEIMRQGMMLRQPSTTDLPPGPNASAGMDPFLSGLTDHSRQESADSLG  
MCNSYSLPHTPEDFLANMDDNMDGVSEGGNPTDMAALDGPDISSLSdniDSTDDLVPQLSEEFSSDILDDVQS  
LINPNSRPDNVLTWL PLMRKLPNSFFNPP

rs:XP\_023721988 [XP\_023721988] transcriptional coactivator yorkie isoform  
X4 [Cryptotermes secundus]. 45..59

MALNPDSEQHKGNLVVRIDEDSDSDLQALFDSVLKPDSCRPLQVPLMRKLPNSFFNPPSTGSKSPSVS  
SISHSRENSADSAFGTASVGAGPGGTTTTASGASGLQVNHPRAHSSPASLQQTYASAQQQQHGHKLQRSYDITP  
VDELGPLPPGWAQARTPEGQVYYLNHITRTTTTWEDPRKTLAAQVTQSQQQQQQQQQQQQQTSADLISNVAGSPH  
SSTSPQPQGTKSVDASSLGLPEGWDQATTQEGEVYFINHQTRTTSWFDPRIPTAMWSRTAIPSLVQRMRLRLS  
ANHTLHLQKSPAGSLLPQQSTSWIQPLSAQSQVCQQIRLQSLQMERERLKLKQQEIMRQGMMLRQPSTTDLPPGP  
NSAGMDPFLSGLTDHSRQESADSLGMCNSYSLPHTPEDFLANMDDNMDGVSEGGNPTDMAALDGPDISSLSdni  
DSTDDLVPQLQFPML PLMRKLPNSFFNPP

rs:XP\_005287639 [XP\_005287639] protein **FAM181B** [Chrysemys picta bellii].  
195..209

MAVQAAILNPHHFI PFCFPASGGLADYVDLEKSYEDGGAALLAGGGVGGGEDPGDFKEATRDLDSFIDS  
ASSNIKLALDKPVKSKRKVNHRKYLQKQIKRGTGIIASAPAAPAPAGGQELPKRPAPPAGAASPQSPCPPGAGH

CKPPAKREASQAASSLQSKSLAALFDSLHQGRAGEKGPAGGSGGGGPRKVPLRNRNLPPSFFTEPAAPPPRAPPL  
SASPALERGGGSPEAAEFFELLGPDYGGLLPEQPPAQEGFPARLPPELGMEPALYEPHLLPPLPHLLGAMLYPE  
PAWSPPAKKSPPAAASCSSLSLPETLRPLPAMGAPGAPLYPASSDPAPAGGEESPAQLAAAFAPYFPDCPLPPP  
AMPYEYSAGYNRVAYSGL PLRNRNLPPSFFTEP

rs:XP\_005307536 [XP\_005307536] protein **FAM181A** [Chrysemys picta  
bellii].>rs:XP\_005307537 [XP\_005307537] protein **FAM181A** [Chrysemys picta  
bellii]. 126..140

MASDSEVKTLLNFVNLAASSDIKAALDKSAPCRRSVDHRKYLQKQLKRFSQKYSRIPRCHPSKSMESSK  
RGAEDNRSSDPDGPDPNHCKASSEKALRLSEVEENFSGGQVLQEQSPESLRPDQVPMRKRQLPASFWEEP  
RPTQSLLVGSFPAGLDGLPNSRDLPPYEGKKSCKGPDTTTEPGSPPLPAQPSGEKEPIKVPGTSLSGRMNAWSCCPFYH  
GQPVYQTHGALPQSPFPLGLWRKSTAPAGEIQHFCKEAGNMGQKLYRPVVLKPIPTKPAVPPPIFNVFGYI  
PMRKRQLPASFWEEP

rs:XP\_012246006 [XP\_012246006] transcriptional coactivator YAP1 [Bombus  
impatiens]. 46..60

MALNQDQDQLSKSNLVVNIQNSESDLQALFDSVLKPKDRPLQVPLMRNLPPSFFNPPSTGSKSPSI  
SHSRENSADSAFGTAAAVAGAGPAPGGNATGTSATGAAGAATGGSGNTAAGTGSNAAGAXXXXXXXXXAAAGLTV  
HPRAHSSPASLQQTYSAAQAPQHAPQPHARHHHHQKQRSYDVI STVDDLGLPLPHGWEQARTPEGQIYFLNHLTR  
TTTWEDPRKTAANVAVAVAVDNGKSSSTGATNSLGLPDGWEQARTPEGEIYFINHQTRTTSWFDPRIPHTLQ  
RAPTSGAMLPQNLWQQQPTGGGIQSNQTLQACQOKLRQLQSLQMERERLKRQOEIIRQOELMLRQSTTDAAMP  
FLSGINEQHARQESADSLGLGSAYSHPHTPEDFLANIDNMDGTSDDGAPMETPDLSTLSDNIDSTDDLVP  
SLQLSEDFSSDILDDVQSLINPNTTKPENVLTLW PLRMRNLPPSFFNPP

rs:XP\_024616126 [XP\_024616126] transcriptional coactivator YAP1  
[Neophocaena asiaeorientalis asiaeorientalis].>tr:A0A341CMW9\_9CETA  
[A0A341CMW9] SubName: Full=transcriptional coactivator YAP1  
{ECO:0000313|RefSeq:XP\_024616126.1}; 13..27

MNPKTANVPQTPMRLRKLPPSFFKPPKSHSRQASTDAGTAGALTPQHVRHSSPASLQLGAVSPGT  
LTPTGVVSGPAATPTAQHLRQSSFEIPDDVPLPAGWEMAKTSSGQRYFLNHIDQTTWQDPRKAMLSQMNVTSP  
TSPVQNMNSASGPLPDGWEQAMTQDGEIYYINHKNKTTSWLDPRLDPRFAMNQRISQSAPVKQPPPLAQSPQ  
GGVMGGGNSNQOQMRLLQQLQMEKERLRLKQOELLRQELALRSQLPTEQDGGTQNPVSSPGMSQELRTMTTNS  
SDPFLNSGTYHSRDESTDSGLSMSSYSVPRTPDDFLNSVDEMDTGDTINQSTLPSQQNRFPDYLEAIPGTNVDLGT  
LEGDGMNIEGEEMLPMSLQEQALSSDILNDMESVLAATKLDKESFLTWL PMRLRKLPPSFFKPP

rs:XP\_011535599 [XP\_011535599] protein **FAM181A** isoform X1 [Homo sapiens].  
169..183

MAAVGLESLEGEVSSVPFLGAAGHQQLPSSWKASCSPVMSADSDVKMLLNFNLAASSDIKAALDKSA  
PCRRSVDHRKYLQKQLKRFSQKYSRLPRGLPGRAAEPYLKRGSEDRPRRLLDLGPDSSPGGGGCKEKVLRNPY  
REECLAKEQLPQRQHPEAAQPGQVPMRKRQLPASFWEEPRTSHYHVGLEGGLPREGPPYEGKKNCKGLEPLGP  
ETTLVSMSPRALAEKEPLKMPGVSLVGRVNAWSCCPFYHQPPIYPGLGALPQSPVPSLGLWRKSPAFFGELAH  
LCKDVDGLGQKVCPRVVLKPIPTKPAVPPPIFNVFGYL PMRKRQLPASFWEEP

rs:XP\_006907601 [XP\_006907601] transcriptional coactivator YAP1, partial  
[Pteropus alecto]. 53..67

PGQPAPPGSQAASQAPPAGHQIVHVRGDSETDLEALFNAVMPKTANVPQTPMRLRKLPPSFFKPP  
KSHSRQASTDAGTAGALTPQHVRHSSPASLQLGAVSPGALTPPTGVVSGPAATPTAQHLRQSSFEIPDDVPLPAG  
WEMAKTSSGQRYFLNHIDQTTTWQDPRKAMLSQMNVTAPTSPVQNMNSASGPLPDGWEQAMTQDGEIYYINH  
KNKTTSWLDPRLDPRFAMNQRISQSAPVKQPPPLAQSPQGGVMGGGNSNQOQMRLLQQLQMEKERLRLKQOELL  
RQAMRNINPSTANSKQELALRSQLPTEQDGGTQNPVSSPGMSQELRTMTTNSSDPFLNSGTYHSRDESTDSG  
LSMSSYSVPRTPDDFLNSVDEMDTGDSINQSTLPSQQNRFPDYLEAIPGTNVDLGTLEGDGMNIEGEEMLPMSLQ  
EQALSSDILNDMESVLAATKLDKESFLTWL PMRLRKLPPSFFKPP

rs:XP\_006925613 [XP\_006925613] protein **FAM181A** [Pteropus  
alecto].>rs:XP\_006925612 [XP\_006925612] protein **FAM181A** [Pteropus  
alecto].>rs:XP\_011377919 [XP\_011377919] protein **FAM181A** [Pteropus  
vampyrus]. 129..143

MASDSVKMLLNFNLAASSDIKAALDKSAPCRRSVDHRKYLQKQLKRFSQKYSRLPRGLPGRGAEPHLK  
RGPEDRPGRLPLDSGPDAGPGGGGCKEKALGNPYREACLAKEQTLQGNPEVARPGQVPMRKRQLPASFWEEP

PTHSYPVGLGGLRAGPPYEGKKHCKGLEPLGPEAARVPMSPRVPAEKEPLKMPGVSLVGRVNAWSCCFQYH  
GQPSYPGPPGALPQSPVPSLGLWRKSSVSPGELAHFCKDVDGLGQKVYRPVVLKPIPTKPPALPPPIFNVFGYL  
PMRKRQLPASFWEEP

rs:XP\_024921608 [XP\_024921608] transcriptional coactivator YAP1-like  
[Cynoglossus semilaevis]. 74..88

MNLDSVDDVKKFGVSQLQTIIVPDLGDTMDAHRGAPPAGQQVVHVRGDSQTELEALFSAVMNPKNKAVRQ  
PASLPMRMRKLPDSFFRQPDPRGHSRQASSDGGVCGTLTPHHVRAHSSPASLPVNSLSTQTADVAATPIIPDDVP  
LPHGWEMAKTSTGQRYFLNHDKTTTTWHDPRLSQLQSPAAQHPIAGPPLHAHSLSNPAQTQQQNINPETGPLPE  
GWEQAVTADGEVYYIDHINKSTTWVDPRLAQNMPGILGMVMQQRQEKERLRCKQGHPPQAAAPQEVGGRNQMSGG  
IDHDRNSQTLVPLNDVIRISSNHEPTLNGAHSRNESTDSGLSVSSLPRTSDHMLSSVDHMDTGDSDGENSSITLQE  
SMPVMPMSEGDELMPICEPLSSDLLMDMETVLSGSHMERDSSLTTLWLPMRMRKLPDSFFRQ

rs:XP\_008307022 [XP\_008307022] transcriptional coactivator YAP1  
[Cynoglossus semilaevis].>tr:A0A3P8V333\_CYNSE [A0A3P8V333] SubName:  
Full=Yes-associated protein 1 {ECO:0000313|Ensembl:ENSCSEP00000008524};  
45..59

MDPSQHNPPAGHQIVHVRGDSETDLETLFNAVMNPKNTIIPPSVPMRMRKLPDSFFKPPPEPKSHSRQAS  
TDAGSGGTLTPHHVRAHSSPASLQLGAVSGGSMGMPAGASPOHLRQSSYEIPDDVPLPPGWEMAKTASGQRYF  
LNHIDQTTTWQDPRKALLQMNQAPPANTVPVQQNLMPASGALPEGWEQAMTEPEGEIYFINHKNKSTSWLDPRL  
DQRYALNQQRITQSAPVKQGGPLPPNTHSGVMGSNSQMRLQOIKERLRKQOELLRQRPELALRNQLPNSMDQ  
DGGTNPVSSPLAQDARTMTANSSDPFLNSGTYHSRDESTDSGLSMSSYSVPRTPDDFLNSVDEMMDTGDPLQSTMA  
TQPSRFPDYLDIIPGTDVLDLGTMESESMAVEGEELMPSLQEQALSSDILNDMESVLAATKIDKESFLTWL  
PMRMRKLPDSFFKPP

rs:XP\_008307029 [XP\_008307029] LOW QUALITY PROTEIN: protein **FAM181B**  
[Cynoglossus semilaevis]. 243..257

MQVVGHKQRVKSPGXVPLLFDVLTFSVQPPVRSRSPCSXSQPVTFNRECLQEAVSGSECFPRAQTETCFE  
ESLGSGITAGEAAELRSRVMVQTAIMNPQFMNFCFPGSVMEYDVKSLDGSLLGEAENDEYKETTRDLLNFID  
SASSNIKLALDKPVKSKRKNVHRKYLQKQIKRCTGIIITPGTGAEPGKRQGSPLAQPSPLQNKTLPKRDGVQANL  
QSKSLAALFSPAKEIRGEKAKKPLRHRNLPPSFFTEPANCSKVSSTSGMTLKDLEGRNPEAVEFFELLGPDYSN  
MVSDQDLYPNSSLRLQPEMGTLDPACYDSHHLVGGLLYSEPWTSCSGPSKNLRASPAQPPVYQSEAAAAAAAAA  
GNMDDNALCTLTFPNFFTDCSIPOVTYDLNGGYSRANYSSLPLRHRNLPPSFFTEP

rs:XP\_015135770 [XP\_015135770] LOW QUALITY PROTEIN: protein **FAM181B**  
[Gallus gallus]. 304..318

MRPPLGSLRTPRTAPHNCPQNLPHLCSLPVQGPFRFRSVCVYVLRGIQPVRCPRCWGHVPAPPGHDP  
PAPPLSPPEGSARPAPRCRREAGMPCAPRWALLSRPPLFPPTTAASAAPVPVQPCGARRRGAPPAMAVPAAL  
LSPHLLSFCFPAGLLGYADLEKGYEGGGVGGGGGGGCEAGDFKEATRDLDSFIDSASSNIKLALDKPVKSK  
RKNVHRKYLQKQIKRCTGIIAPPPAAPPSACPKPPPPRREGSQAGSSLQSRSLAALFGSLQPGRGSAGSDGGG  
AAGGGPRKVPDRNLPPSFFTEPGAKETEKGGEAAEFFELLGPEYGALLPEHAAPPQDAFPAGRRPPSWGWS  
TGCTRAPLPAAPHLLGGLLYPEPPWSPGPCSPAKKAPPEALRPLYPEPAAGGDAFGPFFPECPLPPPQMPYDY  
GGGFHRAAYTGL PLRDRNLPPSFFTEP

rs:XP\_414952 [XP\_414952] uncharacterized protein LOC416655 isoform X1  
[Gallus gallus]. 202..216

MHGAAAPRVSPGPGVSLCTDMAAGVIQPLAELRLPSFFPHGLLLPARPEPDFPDLSEEDDEEEEEEEED  
EEEEAEESAGCSGPEPAGPNAEETTLRLLRFSELISCDIQRYFGRRGREGAAAGHSVPEDCSSPHSSPRDASLGH  
TARGGRAQPEAALGGHGAQRLGPLAELFEYGVHRCLAPRVVSGKTQRLERKYGHITPMHRRKLPSPFWREP  
PGSLLHASTPDFSDLLAHWTVEPGPELPGSGRELPPVLGHAGLEAEPYSGL PMHRRKLPSPFWREP

rs:XP\_015150107 [XP\_015150107] uncharacterized protein LOC416655 isoform  
X2 [Gallus gallus]. 181..195

MAAGVIQPLAELRLPSFFPHGLLLPARPEPDFPDLSEEDDEEEEEEEEDEEEEAEESAGCSGPEPAGPNA  
AETTLRLLRFSELISCDIQRYFGRRGREGAAAGHSVPEDCSSPHSSPRDASLGHARGGRAQPEAALGGHGAQRL  
LGPLAELFEYGVHRCLAPRVVSGKTQRLERKYGHITPMHRRKLPSPFWREP  
EPGPELPGSGRELPPVLGHAGLEAEPYSGL PMHRRKLPSPFWREP

rs:XP\_006110881 [XP\_006110881] transcriptional coactivator YAP1 isoform X9 [Pelodiscus sinensis]. 73..87

MDPGQPQQAQPPAQQAQPPGAQSGAGQPPGAGPPPAGHQIVHVRGDSETDLEALFNAVMPKGANVPH  
HTLPMRLRKLKLPDSFFKPPPEPKAHSRQASTDAGSAGALTPQHVRHSSPASLQVGAVSPGTLTPSGVVTPGGAAPS  
SQHLRQSSFEIPDDVPLPPGWEMAKTPSGQRYFLNHIDQTTTWQDPRKAILSQMNVTAPTSPVQQSIMNSASGP  
LPDGWEQAMTQDGEIYYINHKNTTSWLDPRLDPRFAMNQRISQSAPVKQPPPLAPQSPQGGVMGGSSNQQQQM  
RLQQLQMEKERLRLKHQELLRQVRPQALRNINPSTANSFKRQELALRSQLPMSMEQDGGSQNPVSSPGMSQELRTM  
TTNSSDPFLNSGTYSRDESTDSGLSMSSYSVPRTPDDFLNSVDEMDTGDISQSNIPSHQNRFPDYLEAIPGTNV  
DLGTLEGDGMNIEGEEELMPSLQEQALSSDILNDMESVLAATKLDKESFLTWL PMRLRKLKLPDSFFKPP

rs:XP\_006110882 [XP\_006110882] transcriptional coactivator YAP1 isoform X10 [Pelodiscus sinensis]. 73..87

MDPGQPQQAQPPAQQAQPPGAQSGAGQPPGAGPPPAGHQIVHVRGDSETDLEALFNAVMPKGANVPH  
HTLPMRLRKLKLPDSFFKPPPEPKAHSRQASTDAGSAGALTPQHVRHSSPASLQVGAVSPGTLTPSGVVTPGGAAPS  
SQHLRQSSFEIPDDVPLPPGWEMAKTPSGQRYFLNHIDQTTTWQDPRKAILSQMNVTAPTSPVQQSIMNSASGP  
LPDGWEQAMTQDGEIYYINHKNTTSWLDPRLDPRFAMNQRISQSAPVKQPPPLAPQSPQGGVMGGSSNQQQQM  
RLQQLQMEKERLRLKHQELLRQALRNINPSTANSFKRQELALRSQLPMSMEQDGGSQNPVSSPGMSQELRTMTTNS  
SDPFLNSGTYSRDESTDSGLSMSSYSVPRTPDDFLNSVDEMDTGDISQSNIPSHQNRFPDYLEAIPGTNVDLGT  
LEGDGMNIEGEEELMPSLQEQALSSDILNDMESVLAATKLDKESFLTWL PMRLRKLKLPDSFFKPP

rs:XP\_006110883 [XP\_006110883] transcriptional coactivator YAP1 isoform X11 [Pelodiscus sinensis]. 73..87

MDPGQPQQAQPPAQQAQPPGAQSGAGQPPGAGPPPAGHQIVHVRGDSETDLEALFNAVMPKGANVPH  
HTLPMRLRKLKLPDSFFKPPPEPKAHSRQASTDAGSAGALTPQHVRHSSPASLQVGAVSPGTLTPSGVVTPGGAAPS  
SQHLRQSSFEIPDDVPLPPGWEMAKTPSGQRYFLNHIDQTTTWQDPRKAILSQMNVTAPTSPVQQSIMNSASGP  
LPDGWEQAMTQDGEIYYINHKNTTSWLDPRLDPRFAMNQRISQSAPVKQPPPLAPQSPQGGVMGGSSNQQQQM  
RLQQLQMEKERLRLKHQELLRQVRPQELALRSQLPMSMEQDGGSQNPVSSPGMSQELRTMTTNSSDPFLNSGTYS  
RDESTDSGLSMSSYSVPRTPDDFLNSVDEMDTGDISQSNIPSHQNRFPDYLEAIPGTNVDLGTLEGDGMNIEGEE  
LMPSLQEQALSSDILNDMESVLAATKLDKESFLTWL PMRLRKLKLPDSFFKPP

rs:XP\_006110884 [XP\_006110884] transcriptional coactivator YAP1 isoform X12 [Pelodiscus sinensis].>tr:K7FW13\_PELSI [K7FW13] SubName: Full=Yes associated protein 1 {ECO:0000313|Ensembl:ENSPSIP00000012223}; 73..87

MDPGQPQQAQPPAQQAQPPGAQSGAGQPPGAGPPPAGHQIVHVRGDSETDLEALFNAVMPKGANVPH  
HTLPMRLRKLKLPDSFFKPPPEPKAHSRQASTDAGSAGALTPQHVRHSSPASLQVGAVSPGTLTPSGVVTPGGAAPS  
SQHLRQSSFEIPDDVPLPPGWEMAKTPSGQRYFLNHIDQTTTWQDPRKAILSQMNVTAPTSPVQQSIMNSASGP  
LPDGWEQAMTQDGEIYYINHKNTTSWLDPRLDPRFAMNQRISQSAPVKQPPPLAPQSPQGGVMGGSSNQQQQM  
RLQQLQMEKERLRLKHQELLRQELALRSQLPMSMEQDGGSQNPVSSPGMSQELRTMTTNSSDPFLNSGTYSRDES  
TDSGLSMSSYSVPRTPDDFLNSVDEMDTGDISQSNIPSHQNRFPDYLEAIPGTNVDLGTLEGDGMNIEGEEELMPS  
LQEQALSSDILNDMESVLAATKLDKESFLTWL PMRLRKLKLPDSFFKPP

rs:XP\_006110888 [XP\_006110888] transcriptional coactivator YAP1 isoform X13 [Pelodiscus sinensis]. 73..87

MDPGQPQQAQPPAQQAQPPGAQSGAGQPPGAGPPPAGHQIVHVRGDSETDLEALFNAVMPKGANVPH  
HTLPMRLRKLKLPDSFFKPPPEPKAHSRQASTDAGSAGALTPQHVRHSSPASLQVGAVSPGTLTPSGVVTPGGAAPS  
SQHLRQSSFEIPDDVPLPPGWEMAKTPSGQRYFLNHIDQTTTWQDPRKAILSQMNVTAPTSPVQQSIMNSASAM  
NQRISQSAPVKQPPPLAPQSPQGGVMGGSSNQQQQMRLQQLQMEKERLRLKHQELLRQELALRSQLPMSMEQDGG  
SQNPVSSPGMSQELRTMTTNSSDPFLNSGTYSRDESTDSGLSMSSYSVPRTPDDFLNSVDEMDTGDISQSNIPS  
HQNRFPDYLEAIPGTNVDLGTLEGDGMNIEGEEELMPSLQEQALSSDILNDMESVLAATKLDKESFLTWL  
PMRLRKLKLPDSFFKPP

rs:XP\_025122781 [XP\_025122781] transcriptional coactivator YAP1 isoform X1 [Bubalus bubalis]. 84..98

MDPGPPPPQAPQGGQPPPAQAPQGGQPPSAPGQAPPPGPPAAPQAPPAGHQIVHVRGDSETDLEALFN  
AVMNPKTANVPQTPMRLRKLKLPDSFFKPPPEPKSHSRQASTDAGTAGALTPQHVRHSSPASLQVGAVSPGTLTPT  
GVVSGPAAAPAAQHLRQSSFEIPDDVPLPAGWEMAKTSSGQRYFLNHIDQTTTWQDPRKAMLSQMNVTPTSPV  
QQNMNSASGPLPDGWEQAMTQDGEIYYINHKNTTSWLDPRLDPRFGKAMNQRISQSAPVKQPPPLAPQSPQGG  
VLGGSSNQQQQMRLQQLQMEKERLRLKHQELLRQVRPQAMRNINPSTANSFKCQELALRSQLPMSMEQDGGTQNP  
VSSPGMSQELRTMTTNSSDPFLNSGTYSRDESTDSGLSMSSYSVPRTPDDFLNSVDEMDTGDITINQSTLPSQQN

RFPDYLEAIPGTNVDLGTLEGDGMNIEGEELMPSLQEQALSSDILNDMESVLAATKLDKESFLTWL  
PMRLRKLPSFFKPP

rs:XP\_025122783 [XP\_025122783] transcriptional coactivator YAP1 isoform  
X2 [Bubalus bubalis]. 84..98

MDPGPPPPQPAPQGQGGPPPAQAPQGGPPSAPGQPAPPPGPPAAPQAPPAGHQIVHVRGDSETDLEALFN  
AVMNPKTANVPQTVPMRLRKLPSFFKPPPEPKSHSRQASTDAGTAGALTPQHVRHSSPASLQLGAVSPGTLTPT  
GVVSGPAAAPAAQHLRQSSFEIPDDVPLPAGWEMAKTSSGQRYFLNHIDQTTTWQDPRKAMLSQMNVSTPTSPPV  
QQNVMNASGPLPDGWEQAMTQDGEIYYINHKNKTTSWLDPRLDPRFAMNQRISSAPVKQPPPLAPQSPQGGVL  
GGGSSNQQQMRLQQLQMEKERLRLKQEQELLRQVRPQAMRNINPSTANSPKCQELALRSQLPTLEQDGGTQNPVS  
SPGMSQELRTMTTNSSDPFLNSGTYHSRDESTDSGLSMSSYSVPRTPDFFLNSVDEMDTGDTINQSTLPSQQNRF  
PDYLEAIPGTNVDLGTLEGDGMNIEGEELMPSLQEQALSSDILNDMESVLAATKLDKESFLTWL  
PMRLRKLPSFFKPP

rs:XP\_025122784 [XP\_025122784] transcriptional coactivator YAP1 isoform  
X3 [Bubalus bubalis]. 84..98

MDPGPPPPQPAPQGQGGPPPAQAPQGGPPSAPGQPAPPPGPPAAPQAPPAGHQIVHVRGDSETDLEALFN  
AVMNPKTANVPQTVPMRLRKLPSFFKPPPEPKSHSRQASTDAGTAGALTPQHVRHSSPASLQLGAVSPGTLTPT  
GVVSGPAAAPAAQHLRQSSFEIPDDVPLPAGWEMAKTSSGQRYFLNHIDQTTTWQDPRKAMLSQMNVSTPTSPPV  
QQNVMNASGPLPDGWEQAMTQDGEIYYINHKNKTTSWLDPRLDPRFGKAMNQRISSAPVKQPPPLAPQSPQGG  
VLGGGSSNQQQMRLQQLQMEKERLRLKQEQELLRQAMRNINPSTANSPKCQELALRSQLPTLEQDGGTQNPVSSP  
GMSQELRTMTTNSSDPFLNSGTYHSRDESTDSGLSMSSYSVPRTPDFFLNSVDEMDTGDTINQSTLPSQQNRF  
PDYLEAIPGTNVDLGTLEGDGMNIEGEELMPSLQEQALSSDILNDMESVLAATKLDKESFLTWL  
PMRLRKLPSFFKPP

rs:XP\_025122785 [XP\_025122785] transcriptional coactivator YAP1 isoform  
X4 [Bubalus bubalis]. 84..98

MDPGPPPPQPAPQGQGGPPPAQAPQGGPPSAPGQPAPPPGPPAAPQAPPAGHQIVHVRGDSETDLEALFN  
AVMNPKTANVPQTVPMRLRKLPSFFKPPPEPKSHSRQASTDAGTAGALTPQHVRHSSPASLQLGAVSPGTLTPT  
GVVSGPAAAPAAQHLRQSSFEIPDDVPLPAGWEMAKTSSGQRYFLNHIDQTTTWQDPRKAMLSQMNVSTPTSPPV  
QQNVMNASGPLPDGWEQAMTQDGEIYYINHKNKTTSWLDPRLDPRFAMNQRISSAPVKQPPPLAPQSPQGGVL  
GGGSSNQQQMRLQQLQMEKERLRLKQEQELLRQAMRNINPSTANSPKCQELALRSQLPTLEQDGGTQNPVSSP  
GMQELRTMTTNSSDPFLNSGTYHSRDESTDSGLSMSSYSVPRTPDFFLNSVDEMDTGDTINQSTLPSQQNRF  
PDYLEAIPGTNVDLGTLEGDGMNIEGEELMPSLQEQALSSDILNDMESVLAATKLDKESFLTWL  
PMRLRKLPSFFKPP

rs:XP\_025122786 [XP\_025122786] transcriptional coactivator YAP1 isoform  
X5 [Bubalus bubalis]. 84..98

MDPGPPPPQPAPQGQGGPPPAQAPQGGPPSAPGQPAPPPGPPAAPQAPPAGHQIVHVRGDSETDLEALFN  
AVMNPKTANVPQTVPMRLRKLPSFFKPPPEPKSHSRQASTDAGTAGALTPQHVRHSSPASLQLGAVSPGTLTPT  
GVVSGPAAAPAAQHLRQSSFEIPDDVPLPAGWEMAKTSSGQRYFLNHIDQTTTWQDPRKAMLSQMNVSTPTSPPV  
QQNVMNASGPLPDGWEQAMTQDGEIYYINHKNKTTSWLDPRLDPRFGKAMNQRISSAPVKQPPPLAPQSPQGG  
VLGGGSSNQQQMRLQQLQMEKERLRLKQEQELLRQVRPQELALRSQLPTLEQDGGTQNPVSSPGMSQELRTMTT  
NSSDPFLNSGTYHSRDESTDSGLSMSSYSVPRTPDFFLNSVDEMDTGDTINQSTLPSQQNRFPDYLEAIPGTNVDL  
GTLEGDGMNIEGEELMPSLQEQALSSDILNDMESVLAATKLDKESFLTWL PMRLRKLPSFFKPP

rs:XP\_025122787 [XP\_025122787] transcriptional coactivator YAP1 isoform  
X6 [Bubalus bubalis]. 84..98

MDPGPPPPQPAPQGQGGPPPAQAPQGGPPSAPGQPAPPPGPPAAPQAPPAGHQIVHVRGDSETDLEALFN  
AVMNPKTANVPQTVPMRLRKLPSFFKPPPEPKSHSRQASTDAGTAGALTPQHVRHSSPASLQLGAVSPGTLTPT  
GVVSGPAAAPAAQHLRQSSFEIPDDVPLPAGWEMAKTSSGQRYFLNHIDQTTTWQDPRKAMLSQMNVSTPTSPPV  
QQNVMNASGPLPDGWEQAMTQDGEIYYINHKNKTTSWLDPRLDPRFAMNQRISSAPVKQPPPLAPQSPQGGVL  
GGGSSNQQQMRLQQLQMEKERLRLKQEQELLRQVRPQELALRSQLPTLEQDGGTQNPVSSPGMSQELRTMTTNS  
SDPFLNSGTYHSRDESTDSGLSMSSYSVPRTPDFFLNSVDEMDTGDTINQSTLPSQQNRFPDYLEAIPGTNVDL  
GTLEGDGMNIEGEELMPSLQEQALSSDILNDMESVLAATKLDKESFLTWL PMRLRKLPSFFKPP

rs:XP\_025122788 [XP\_025122788] transcriptional coactivator YAP1 isoform  
X7 [Bubalus bubalis]. 84..98

MDPGPPPPQPAPQGQGGPPPAQAPQGGPPSAPGQPAPPPGPPAAPQAPPAGHQIVHVRGDSETDLEALFN

AVMNPKTANVPQTVPMRLRKLKLPDSFFKPPPEPKSHSRQASTDAGTAGALTPQHVRHSSPASLQLGAVSPGTLTPT  
GVVSGPAAAPAAQHLRQSSFEIPDDVPLPAGWEMAKTSSGQRYFLNHIDQTTTWQDPRKAMLSQMNVSTPTSPPV  
QQNMNSASGPLPDGWEQAMTQDGEIYYINHKNKTTSWLDPRLDPRFGKAMNQRIQSAPVKQPPPLAPQSPQGG  
VLGGSSNQQQMRLQQLQMEKERLRLKQQEELLRQELALRSQLPTLEQDGGTQNPVSSPGMSQELRTMTTNSSDP  
FLNSGTYHSRDESTDSGLSMSSYSVPRTPDDEFNSVDEMDTGDTINQSTLPSQQNRFPDYLEAIPGTNVDLGTLE  
GDGMNIEGEEMLPSLQEQALSSDILNDMESVLAATKLDKESFLTWL PMRLRKLKLPDSFFKPP

rs:XP\_025122789 [XP\_025122789] transcriptional coactivator YAP1 isoform  
X8 [Bubalus bubalis]. 84..98

MDPGPPPPQAPQGGQPPPAQAPQGGQPPSAPGQPAPPPGPPAAPQAPPAGHQIVHVRGDSETDLEALFN  
AVMNPKTANVPQTVPMRLRKLKLPDSFFKPPPEPKSHSRQASTDAGTAGALTPQHVRHSSPASLQLGAVSPGTLTPT  
GVVSGPAAAPAAQHLRQSSFEIPDDVPLPAGWEMAKTSSGQRYFLNHIDQTTTWQDPRKAMLSQMNVSTPTSPPV  
QQNMNSASGPLPDGWEQAMTQDGEIYYINHKNKTTSWLDPRLDPRFAMNQRIQSAPVKQPPPLAPQSPQGGVL  
GGGSSNQQQMRLQQLQMEKERLRLKQQEELLRQELALRSQLPTLEQDGGTQNPVSSPGMSQELRTMTTNSSDPFL  
NSGTYHSRDESTDSGLSMSSYSVPRTPDDEFNSVDEMDTGDTINQSTLPSQQNRFPDYLEAIPGTNVDLGTLEGD  
GMNIEGEEMLPSLQEQALSSDILNDMESVLAATKLDKESFLTWL PMRLRKLKLPDSFFKPP

rs:XP\_025122790 [XP\_025122790] transcriptional coactivator YAP1 isoform  
X9 [Bubalus bubalis]. 84..98

MDPGPPPPQAPQGGQPPPAQAPQGGQPPSAPGQPAPPPGPPAAPQAPPAGHQIVHVRGDSETDLEALFN  
AVMNPKTANVPQTVPMRLRKLKLPDSFFKPPPEPKSHSRQASTDAGTAGALTPQHVRHSSPASLQLGAVSPGTLTPT  
GVVSGPAAAPAAQHLRQSSFEIPDDVPLPAGWEMAKTSSGQRYFLNHIDQTTTWQDPRKAMLSQMNVSTPTSPPV  
QQNMNSASAMNQRIQSAPVKQPPPLAPQSPQGGVLGGGSSNQQQMRLQQLQMEKERLRLKQQEELLRQVRPQA  
MRNINPSTANSPKCQELALRSQLPTLEQDGGTQNPVSSPGMSQELRTMTTNSSDPFLNSGTYHSRDESTDSGLSM  
SSYSVPRTPDDEFNSVDEMDTGDTINQSTLPSQQNRFPDYLEAIPGTNVDLGTLEGDGMNIEGEEMLPSLQEQALS  
SDILNDMESVLAATKLDKESFLTWL PMRLRKLKLPDSFFKPP

rs:XP\_025122791 [XP\_025122791] transcriptional coactivator YAP1 isoform  
X10 [Bubalus bubalis]. 84..98

MDPGPPPPQAPQGGQPPPAQAPQGGQPPSAPGQPAPPPGPPAAPQAPPAGHQIVHVRGDSETDLEALFN  
AVMNPKTANVPQTVPMRLRKLKLPDSFFKPPPEPKSHSRQASTDAGTAGALTPQHVRHSSPASLQLGAVSPGTLTPT  
GVVSGPAAAPAAQHLRQSSFEIPDDVPLPAGWEMAKTSSGQRYFLNHIDQTTTWQDPRKAMLSQMNVSTPTSPPV  
QQNMNSASAMNQRIQSAPVKQPPPLAPQSPQGGVLGGGSSNQQQMRLQQLQMEKERLRLKQQEELLRQAMRNI  
NPSTANSPKCQELALRSQLPTLEQDGGTQNPVSSPGMSQELRTMTTNSSDPFLNSGTYHSRDESTDSGLSMSSYS  
VPRTPDDEFNSVDEMDTGDTINQSTLPSQQNRFPDYLEAIPGTNVDLGTLEGDGMNIEGEEMLPSLQEQALSSDIL  
NDMESVLAATKLDKESFLTWL PMRLRKLKLPDSFFKPP

rs:XP\_025122792 [XP\_025122792] transcriptional coactivator YAP1 isoform  
X11 [Bubalus bubalis]. 84..98

MDPGPPPPQAPQGGQPPPAQAPQGGQPPSAPGQPAPPPGPPAAPQAPPAGHQIVHVRGDSETDLEALFN  
AVMNPKTANVPQTVPMRLRKLKLPDSFFKPPPEPKSHSRQASTDAGTAGALTPQHVRHSSPASLQLGAVSPGTLTPT  
GVVSGPAAAPAAQHLRQSSFEIPDDVPLPAGWEMAKTSSGQRYFLNHIDQTTTWQDPRKAMLSQMNVSTPTSPPV  
QQNMNSASAMNQRIQSAPVKQPPPLAPQSPQGGVLGGGSSNQQQMRLQQLQMEKERLRLKQQEELLRQVRPQE  
LALRSQLPTLEQDGGTQNPVSSPGMSQELRTMTTNSSDPFLNSGTYHSRDESTDSGLSMSSYSVPRTPDDEFNSV  
DEMDTGDTINQSTLPSQQNRFPDYLEAIPGTNVDLGTLEGDGMNIEGEEMLPSLQEQALSSDILNDMESVLAATKL  
DKESFLTWL PMRLRKLKLPDSFFKPP

rs:XP\_025122793 [XP\_025122793] transcriptional coactivator YAP1 isoform  
X12 [Bubalus bubalis]. 84..98

MDPGPPPPQAPQGGQPPPAQAPQGGQPPSAPGQPAPPPGPPAAPQAPPAGHQIVHVRGDSETDLEALFN  
AVMNPKTANVPQTVPMRLRKLKLPDSFFKPPPEPKSHSRQASTDAGTAGALTPQHVRHSSPASLQLGAVSPGTLTPT  
GVVSGPAAAPAAQHLRQSSFEIPDDVPLPAGWEMAKTSSGQRYFLNHIDQTTTWQDPRKAMLSQMNVSTPTSPPV  
QQNMNSASAMNQRIQSAPVKQPPPLAPQSPQGGVLGGGSSNQQQMRLQQLQMEKERLRLKQQEELLRQELALR  
SQLPTLEQDGGTQNPVSSPGMSQELRTMTTNSSDPFLNSGTYHSRDESTDSGLSMSSYSVPRTPDDEFNSVDEMD  
TGDTINQSTLPSQQNRFPDYLEAIPGTNVDLGTLEGDGMNIEGEEMLPSLQEQALSSDILNDMESVLAATKLDKES  
FLTWL PMRLRKLKLPDSFFKPP

rs:XP\_025127517 [XP\_025127517] protein **FAM181A** [Bubalus bubalis].  
130..144

MASDSVDMKLLNFVNLASSDIKAALDKSAPCRRSVDHRKYLQKQLKRFSQKYSRLPRGLPGRGAEPHLK  
RGPEDRPGRSLPLESGHSSSPGGGGGCKEKALGNLDREESLSRERTLHGPDPGAARPGQVPMRKRQLPASFWEEP  
RPTHSYVGLGGLGPREGPPYEGKKHCKGLEPLGPETAPVPTS PRAPAEKEPLKMPGVSLVGRVSAWSCFPQY  
HGEPVYSPPPGALPQSPMPSLGLWRKSTASPGELAHFCKDMEGPGQKVYRPVVLKPIPTKPAVPPPIFNVFGYL  
PMRKRQLPASFWEEP

rs:XP\_006055691 [XP\_006055691] protein **FAM181B** [Bubalus bubalis].  
212..226

MAVQAALLSTHPFVFPFGGGSPDGLGGAFGALDKGCCFEDEETGTPAGALLAGAESGDAREATRDLISF  
IDSASSNIKLALDKPGKSKRKNVHRKYLQKQIKRCSGLMGAAPPSPGAAADTPAKRPLAGAQTVPVPAHGKAA  
PRREASQAAAAASLQSRSLAALFDSLHRVPGGADPAGAAEAPAAAGLVGGDAAGSAGGPAVPGARKVPLRARNLP  
PSFFTEPSRAGGGVCGPSGPGVSLGDLEKGEAAEFFELLGPDYAGATEAGALLAAEPLDVFPAAGAVLRGPPPEL  
EPGLFDPQAMVGSLLYPEPWSAPGGPATKKPPLPAPGGGLTLNEPLRSVYPAAADSPGGDDGPGLLASFTPFSS  
DCALPPAPPPPPQVSYDYSAGYSRTAFAGLWRPDGAWEGAPGEEGAPRD PLRARNLPPSFFTEP

rs:XP\_025726233 [XP\_025726233] protein **FAM181A** [Callorhinus  
ursinus].>rs:XP\_027428711 [XP\_027428711] protein **FAM181A** isoform X3  
[Zalophus californianus].>rs:XP\_027428712 [XP\_027428712] protein **FAM181A**  
isoform X3 [Zalophus californianus]. 129..143

MASDSVDMKLLNFVNLASSDIKAALDKSAPCRRSVDHRKYLQKQLKRFSQKYSRLPRGLPGRGAEPHLK  
RGPEDGPGRLPLDSGQDSSPSGGGCYKEKALGNPYGEECLSRQTLQRQNPEAARPGQVPMRKRQLPASFWEEP  
PTHSYPLGLEGLGPREGPPYEGKKHCKGLEPLDPETAPVPASPRALAEKEPLKMSGVSLVGRVNAWSCFPQYH  
GQPIYAGHPGVLPQSPVPSLGLWRKSPASPGELAHFCKDVGPGQKVYRPVVLKPIPTKPAVPPPIFNVFGYL  
PMRKRQLPASFWEEP

rs:XP\_025749929 [XP\_025749929] protein **FAM181B** [Callorhinus ursinus].  
221..235

MAVQAALLSTHPFVFPFGGGSPDGLGGAFGALDKGCCFEDDETGTPAGALLAGAEGGDVREATRDLISF  
IDSASSNIKLALDKPGKSKRKNVHRKYLQKQIKRCSGLMGAAPPSPGAPDAPAKRPLAGPGAQNVAVPLHGK  
AAPRREASQAAAAASLQSRSLAALFDSLHRVPGGDERAGGSVAAPVAGLGGAGAGSGGDAAGPAGGTAVPGARK  
VPLRARNLPPSFFTEPSRAGGGGCGSPGPGVSLGDLEKGAEAFFELLGPDYAGATEASVLLAAEPLDVFPTGA  
AVLRGPPPELEPLFEQPPAMVGSLLYSESWSPAGCPPTKKPPLAARPGGLTLNEPLRPLYPSAADSPPGGEDAPGL  
LASFAPFFSDCALPPPPPPHQVSYDYSAGYSRTAYSSLWRPDGVWEGAPGEEGAHRD PLRARNLPPSFFTEP

rs:XP\_008931850 [XP\_008931850] protein **FAM181A** [Manacus vitellinus].  
127..141

MASDSEVKTLLNFVNLASSDIKAALDKSAPCRRSVDHRKYLQKQLKRFSQKYSRMPRCHPSKPPECGWR  
RGAEDRGRGPQLEAPDPSPHGGAATEKVMQTAEAEETLTGERVLQEQKPEAVRPDQVPMRKRQLPASFWEEP  
QNLRTARAFPASPEGLPAPRDPPIYEGKSKWSPDAAGPESPPDPAPHAGEKDPAGVLSGRVGAWTCCFPFCPGTG  
VYQPPGALPPSPFGLGLWRKSAATLPAEVPHFCKEADGTGQKLYRPMVLKPIPTKPTIPPIFNVFGYL  
PMRKRQLPASFWEEP

rs:XP\_005472252 [XP\_005472252] transcriptional coactivator YAP1 isoform  
X1 [Oreochromis niloticus]. 45..59

MDAHRGAPPAGQQIVHVRGDSQTELEALFTAVMNPNAKQPSSLPMMRKLKLPDSFFRQPDPRGHSRQAS  
SDGGVCGSQAPHVRAHSSPASLPVNSLSTQAADVAATPIIPDDMPLPRGWEMAKTPTGQRYFLNHLDKTTTWH  
PRLAQLQSAQAHPISGPPVHAHLSNPAPTTQPQINPEKGPLPEGWEQAVTADGEMYYIDHINKTTTWDPR  
AQKMNPSILGMAMQQSQEKDRLRCKQGIPOQIIPQDVGGRSQMPGGMDHRSQAQTLIPSLDVRIRASNHEPTLN  
AHSRNESTDSGLSVSSLPRTTDHMLSSVEHMDTGSEPPSMALQDSMPVLPMSSEGEELMPCIPGLSSDLLMDME  
TVLSGSHMDRDSLLTTLW PMRMRKLKLPDSFFRQP

rs:XP\_005472253 [XP\_005472253] transcriptional coactivator YAP1 isoform  
X2 [Oreochromis niloticus]. 45..59

MDAHRGAPPAGQQIVHVRGDSQTELEALFTAVMNPNAKQPSSLPMMRKLKLPDSFFRQPDPRGHSRQAS  
SDGGVCGSQAPHVRAHSSPASLPVNSLSTQAADVAATPIIPDDMPLPRGWEMAKTPTGQRYFLNHLDKTTTWH  
PRLAQLQSAQAHPISGPPVHAHLSNPAPTTQPQINPEKQKMNPSILGMAMQQSQEKDRLRCKQGIPOQIIP  
QDVGGRSQMPGGMDHRSQAQTLIPSLDVRIRASNHEPTLN AHSRNESTDSGLSVSSLPRTTDHMLSSVEHMDTG  
DSEPPSMALQDSMPVLPMSSEGEELMPCIPGLSSDLLMDMETVLSGSHMDRDSLLTTLW PMRMRKLKLPDSFFRQP

rs:XP\_003450207 [XP\_003450207] transcriptional coactivator YAP1 [Oreochromis niloticus].>tr:I3JEC8\_ORENI [I3JEC8] SubName: Full=Yes-associated protein 1 {ECO:0000313|Ensembl:ENSONIP00000007219}; 45..59  
MDPSQHNPAGHQIVHVRGDSETDLEALFNAMNPKVNTVPHSVPMRMRKLPDSFFKPPPEPKSHSRQAS  
TDAGSGGVLIPIHVRHSSPASLQLGAVSGGSLSGMGSTGASPOHLRQSSYEIPDDMPLPDGWEMAKTASGQRYF  
LNHIDQTTTWQDPRKAMLQMNQPPPPSSVPVQPPQIMNPASGPLPDGWEQAITAEGEIYYINHKNKTTSWLDPRL  
EPRYALNQQRISQSAPVKPPGQLPPSISGVMGSNNQMRLOQIEKERLRLKQOELLRQRPQELALRNQLPTSMQD  
GSTNPFVSSPMAQDARTMTANSSDPFLNSGTYHSRDESTDSGLSMSSYSVPRTPDDFLNSVDEMDTGDPLAPSMAT  
QPSRFPDYLDITPGTDVDLGTLEGESMAVEGEELMPSLQEQALSSDILNDMESVLAATKLDKESFLTWL  
PMRMRKLPDSFFKPP

rs:XP\_005455123 [XP\_005455123] protein **FAM181B** [Oreochromis niloticus].>tr:I3L013\_ORENI [I3L013] SubName: Full=Family with sequence similarity 181 member B {ECO:0000313|Ensembl:ENSONIP000000026710}; 155..169  
MAVQTAIMNPQFMNFCFPGSVMEYDVEKSLDGSLLGETENDEYKETTDRDLSFIDSASSNIKLALDKP  
VSKSRKVNHRKYLQKQIKRGTGIIIPGNAEAPVKRQGSPLTQPSLQSKTLPKRDGVQANLQSKSLAALFSPVK  
DIRGEKPKKPLRHRNLPPSFFTEPANCSKVSSTSGMTLKDRLERGNPEAAEFFELLGPDYSNMVSDQDIYQGMPL  
RVQPELGGPDASYDTHHLVGGLLYSEPWTSKSGSPKVKGESLRTGPAQPPVYCQSEGATGPIEDNALCTLAFFN  
FFADCPPIQVTYDLTGGINRANYSSL PLRHRNLPPSFFTEP

rs:XP\_005477059 [XP\_005477059] protein **FAM181A** [Oreochromis niloticus]. 102..116  
MANADSEVKTLNLFVNLAASSDIKAALDKSAPCRRSVDHRKYLQKQLKRFSQKYSRVPRCHTHRSAEYRC  
AKPMGTVHQSVTEKASSGAQDQVDHLGSSVEQVPMRKRQLPASFWEEPKLTPTKREHSYLGMRSHAGTSEGTENE  
KRKRSYDDGAKAAISACSRSSDTEKTLKLDVTSHHCVSVCGCCPFQYHGHQILHNHIFVPHPLGLWSKASGT  
ETERSEHPYQKQIHTHVVKPIPTKPTAQSPIFSVMGFI PMRKRQLPASFWEEP

rs:XP\_018322696 [XP\_018322696] transcriptional coactivator YAP1-A [Agrilus planipennis].>tr:A0A1W4WFF7\_AGRPL [A0A1W4WFF7] SubName: Full=transcriptional coactivator YAP1-A {ECO:0000313|RefSeq:XP\_018322696.1}; 42..56  
MALNQDESSKQVVRVDQDSETDLQALFDSVLKPDSCRPLQVPWSMRKLPDSFFNPPSTGSKSINHSREN  
SVDSAFGSSSGGGSTTTAAVNTVPLQSAHHRHSSPASLQQTAVGQQQTAATHHHIKQRSYDVASKSDDTTPLP  
PGWEQARTPEGQVYYLNHITRTTTTWEDPRKSLAAQVASQQHQSAEQLLTSHQVSPTQSQTSTEVLDLGPLPEGW  
EQAQTPEGEIYFINHQTRTTSWFDPRIPQHLQRTPGIVQPPWHATSSLSPOSSPAKQQQLRLQLLERERLQQR  
QOEIRRQOELMLRGSNTELPMDPFLSSLTDRSRQESADSGLMGTSYSMPHTPEDFLANMDDNMEVGSETHNLDT  
PDISSLSDNIDSTDLVPSLQLGEEFPSVILDDVQSLINPATRSDNGLIWL PWSMRKLPDSFFNPP

rs:XP\_025833269 [XP\_025833269] transcriptional coactivator YAP1-A-like [Agrilus planipennis]. 42..56  
MALNQDESSKQVVRVDQDSETDLQALFDSVLKPDSCRPLQVPWSMRKLPDSFFNPPSTGSKSINHSREN  
SVDSAFGSSSGGGSTTTAAVNTVPLQSAHHRHSSPASLQQTAVGQQQTAATHHHIKQRSYDVASKSDDTTPLP  
PGWEQARTPEGQVYYLK PWSMRKLPDSFFNPP

rs:XP\_025862508 [XP\_025862508] transcriptional coactivator YAP1 [Vulpes vulpes]. 119..133  
MDMLLSSLQRQSGQQKLNIIILKLGKWWGEVWRKRSQATGGPQCHSPGAGFKDMAVDRWDKCMAGVKEMG  
VSKGKGSKGEAPPAGHQIVHVRGDSETDLEALFNAMNPKTANVPQTVPMRLRKLKLPDSFFKPPPEPKAHSRQAST  
DAGTAGALTPQHVRHSSPASLQLGAVSPGTLTPTGVSSGPAAPSAQHLRQSSFEIPDDVPLPAGWEMAKTSSG  
QRYFLNHIDQTTTWQDPRKAMLSQMSVTAPTSPVQSSMMSASGPLPDGWEQAMTQDGEIYYINHKNKTTSWLD  
PRLDPRFAMNQIRISQSAPVKQPPPLAPQSPPGVLGGGSSQQQMRLOQLQMEKERLRLKQOELLRQAMRNISPS  
TANSPKCQELALRSQLEQDGGTNPVPSPGMSQELRTMTTSGSDPFLNSGTYHSRDESTDSGLSMSSYSVPR  
TPDDFLNSVDEMDTGDITINQSTLPSQQNRFPDYLEAIPGTNVDLGTLEGDGMNIEGEEELMPSLQEQALSSDILNDM  
ESVLAATKLDKESFLTWL PMRLRKLKLPDSFFKPP

rs:XP\_025838343 [XP\_025838343] protein **FAM181A** [Vulpes vulpes].129..143  
MASDSVDMMLNLFVNLAASSDIKAALDKSAPCRRSVDHRKYLQKQLKRFSQKYSRLRPLRGLPGRGAEPHLK  
RGAEDRPGRLPLGSGHDSSTGEGGGCKEKALGNPYREECLSKEQTLQRQNPAAARPGQVPMRKRQLPASFWEEP



PTHSYPLGLEGLGPREGPPYESKKHKCKGLEPLDPEMAPVPTSPRAPAEKEPLKMSGVSLVGRVNAWSCCFQYH  
GQPVYAGPPGALPQSPVPLGLWRKSPASPGELAHFCKHVDGPGQKVYRPVVLKPIPTKPAVPPPIFNVFGYL  
PMRKRQLPASFWEEP

rs:XP\_025963554 [XP\_025963554] iroquois-class homeodomain protein IRX-3  
[Dromaius novaehollandiae]. 218..232

MHGLSAALRVSRGPTCTAMAAGVIRHLAELWLPSFFPHALLLPTRPEPDFDLSEEEEEDEEEDDEEEEE  
EEEEEEAADSTSRSGQELAGPSDAETTLQLLKFSELISCDIQRYFGRGRDEDAEGWGTAEDCRSPRRSGRELYY  
AELLRVAQSGEPQEEVARAPGGPRGWQPAGGPGGAPPLGPLAELFEYGLHRCLQPPAADGKTQRLERKYAHITPM  
HKRKLQPSFWREPGPGPALHPSTPDFSDDLANWTAEPAPPELPGAGRELPEPGRPGLEAEHLGLL  
PMHKRKLQPSFWREP

rs:NP\_611879 [NP\_611879] yorkie, isoform D [Drosophila  
melanogaster].>gp:AE013599\_5670 [AE013599] yorkie, isoform D [Drosophila  
melanogaster] 65..79

MLTTMSASSNTNSLIEKEIDDEDMLSPIKSNLNVVRVNQDSTDNLQALFDSVLNPGDAKRPLQLPLMR  
KLPNSFFTPPAPSHSRANSADSTYDAGSQSSINIGNKASIVQQPDGQSPAAIPQLQIQPSPQHSRLAIHHSR  
SSPASLQQNYNVRARSADAAAANNPNANPSSQQQPAGPTFFPENSAQEFPSGAPASSAIDLDMNTCMSQDIPMSMQ  
TVHKKQRSYDVISPIQLNRQLGALPPGWEQAKTNDGQIYYLNHTTKSTQWEDPRIQYRQQQILMAERIKQNESG  
LSVLDCPDNLVSSLQIEDNLCSNLFNDAQAIVNPPSSHKPDDLEWYKIN PLRMRKLPNSFFTPP

rs:NP\_001350857 [NP\_001350857] yorkie, isoform H [Drosophila  
melanogaster].>rs:XP\_016029385 [XP\_016029385] uncharacterized protein  
Dsimw501\_GD24973, isoform B [Drosophila simulans].>rs:XP\_016029387  
[XP\_016029387] uncharacterized protein Dsimw501\_GD24973, isoform D  
[Drosophila simulans]. 88..102

MCACLIAKIILCSFRLYTISAFYMLTTMSASSNTNSLIEKEIDDEDMLSPIKSNLNVVRVNQDSTDNLQ  
ALFDSVLNPGDAKRPLQLPLRMRKLPNSFFTPPAPSHSRANSADSTYDAGSQSSINIGNKASIVQQPDGQSPAA  
IPQLQIQPSPQHSRLAIHHSRARS SPASLQQNYNVRARSADAAAANNPNANPSSQQQPAGPTFFPENSAQEFPSGAP  
ASSAIDLDMNTCMSQDIPMSMQTVHKKQRSYDVISPIQLNRQLGALPPGWEQAKTNDGQIYYLNHTTKSTQWED  
PRIQYRQQQILMAERIKQNDVLQTTKQTTTSTIANNLGPLPDGWEQAVTESGDLYFINHIDRTTSWNDRMQSG  
LSVLDCPDNLVSSLQIEDNLCSNLFNDAQAIVNPPSSHKPDDLEWYKIN PLRMRKLPNSFFTPP

rs:XP\_026048079 [XP\_026048079] transcriptional coactivator YAP1  
[Astatotilapia calliptera].>rs:XP\_004560573 [XP\_004560573] transcriptional  
coactivator YAP1 [Maylandia zebra].>tr:A0A3P9DD61\_9CICH [A0A3P9DD61]  
SubName: Full=Yes-associated protein 1  
{ECO:0000313|Ensembl:ENSMZEP00005032294}; 45..59

MDPSQHNPAGHQIVHVRGDSETDLEALFNAVMPKVNTPVPHSVPMRMRKLPDSFFKPPPEPKSHSRQAS  
TDAGSAGVLIPHVRAHSSPASLQLGAVSGGSLSGMGSTGASQHLRQSSYEIPDDMPLPDGWEMAKTASGQRYF  
LNHIDQTTTWQDPRKALLQMNQAPPSSVVPVQPPIIMPASGSLPDGWEQAITAEGEIYYINHKNKTTSWLDPRL  
EPRYALNQQRISQSAPVKQAGQLPPSISGVMGSNNQMRLOMEKERLRQKQELLRQRPELALRNQLPTSMDQDG  
STNPVSSPMAQDARTMTANSSDPFLNSGTYHSRDESTDSGLSMSSYSVPRTPDDFLNSVDEMDTGDPLAPSMATQ  
PSRFPDYLDTIPTGTDVLDLGTLEGESMAVEGEELMPSLQEQALSSDILNDMESVLAATKLDKESFLTWL  
PMRMRKLPDSFFKPP

rs:XP\_026048709 [XP\_026048709] LOW QUALITY PROTEIN: protein **FAM181B**  
[Astatotilapia calliptera]. 246..260

MQVVGHKQRVKXPVAVPLPLLDVLTSTFVQPPERSXPXLSSESVTSTLECLQELHEQHQQDQVFIKGRACC  
EEILGSRITVDATGVAAGLNRVMAVQTAIMNPQFMNFCFPGSVMEYDVEKSLDGSLLGETENDEYKETTDLDS  
FIDSASSNIKLALDKPVKSKRKNVHRKYLQKQIKRGTGIITPGNAEAPVKRQGSPLTQPSLQSKTLPKRDGVQ  
ANLQSKSLAALFSPVKDIRGEKPKKPLRHRNLPPSFFTEPANCSKVSSTSGMTLKDRLERGNPEATEFFELLGPD  
YCNMVSDDIYQGMPLRVQPELGGPDASYDTHHLVGGLLYSEPWTSCSGPSKKGESMRTPGAQPPVYCQSEGA  
TGPIEDNALCTLAFPNFFADCPVQVYDVTGGYNRANYSSL PLRHRNLPPSFFTEP

rs:XP\_026119065 [XP\_026119065] protein **FAM181B**-like [Carassius auratus].  
156..170

MAVQAAIMNSQFLNFCFPGSVMDYEVKGLGGLLGEVDCEGDFKETTDLDSFIDSASSNIKLALDKP  
VSKRKNVHRKYLQKQIKRGTGIISPGSIPVQEQCKRQGSPhNPTSNLSSKMPKPKDGMQANLQSKSLAALFNSA

KDVRAERAKKPLRHRNLPPSFFMEPANSRVTSTSGMSLKDLEGAPEAAEFLELLGPEYSNMVSEQDLFHTLP  
NRIQQEVTVGPEPYDSHHFVSGGFLYTEPWSTCSSTPKKSGDLRTVPLQPNLYTHTDLSGSMFVEQSSPCALTF  
NFFTDCNATPVSYDVVNGYNRGSFSSL PLRHRNLPPSFFMEP

rs:XP\_026138572 [XP\_026138572] protein **FAM181B** [Carassius auratus].  
156..170

MAVQAAIMNSQFLNFCFPGSVMDYEVEKLEGGLLGEMDCGGDFKETTRDLLSFIDSASSNIKLALDKP  
VKSKRKVNHRKYLQKQIKRCTGIIISPGSTPVQEPCKRQGSPTPTSNLSSKTPPKKDGMAQSLQSKSLAALFNSA  
KDERGEKAKKPLRHRNLPPSFFTEPANSRVTSTSGMSLKDLEGTPEAAEFLELLGPEYSNMVSEQDLLYTAP  
IRIQQEVTAGPEPYDSHHFVSGGFLYTEPWGTCSTKPKGDMRTVPVQPNLYAHTDLSGSPVVEQSSPCALTFP  
NFFTDCSTPPVSYDLVNGYNRGSFSSL PLRHRNLPPSFFTEP

rs:XP\_026143466 [XP\_026143466] transcriptional coactivator YAP1-like  
isoform X1 [Carassius auratus]. 45..59

MDPSQHNPAGHQIVHVRGDSETDLEALFNAVMPKSTIAPPSVPMRMRKLPDSFFKPPPEPKSHSRQAS  
TDAGTAGTLTPQHIRAHSSPASLQLGAVTPGSLSSMVPSPNAPPQHLRQSSYEIPDDVPLPPGWEMAKTPSGQRYF  
LNHNDQTTTWQDPRKALLQMNQAAPASPAPVQQNIMNPASGPLPDGWEQAITSEGEIYYINHKNKTTSWLDPRL  
DPYAMNQORISQSAPVKQGSQLPSSPQSGVLGGNNQIRLQQMQMENERMRIKQELLRQRPQELALRNQLPTSME  
HDGGTQNPVSSPSMGQDARNMTTNSDPFLNSGTYHSRDESTDSGLSMSSYSVPRTPDFFLNSVDEMETGDSLGP  
SSMATQPSRFPDYLDALPGTDVDLGTLEGESMAVEGEELMPSLQEQALSSDILNDMESVLAATKIDKENFLTWL  
PMRMRKLPDSFFKPP

rs:XP\_026143467 [XP\_026143467] transcriptional coactivator YAP1-like  
isoform X2 [Carassius auratus]. 45..59

MDPSQHNPAGHQIVHVRGDSETDLEALFNAVMPKSTIAPPSVPMRMRKLPDSFFKPPPEPKSHSRQAS  
TDAGTAGTLTPQHIRAHSSPASLQLGAVTPGSLSSMVPSPNAPPQHLRQSSYEIPDDVPLPPGWEMAKTPSGQRYF  
LNHNDQTTTWQDPRKALLQMNQAAPASPAPVQQNIMNPASAMNQORISQSAPVKQGSQLPSSPQSGVLGGNNQI  
RLQQMQMENERMRIKQELLRQRPQELALRNQLPTSMEHDGGTQNPVSSPSMGQDARNMTTNSDPFLNSGTYHSR  
DESTDSGLSMSSYSVPRTPDFFLNSVDEMETGDSLGPSSMATQPSRFPDYLDALPGTDVDLGTLEGESMAVEGEE  
LMPSLQEQALSSDILNDMESVLAATKIDKENFLTWL PMRMRKLPDSFFKPP

rs:XP\_026085098 [XP\_026085098] protein **FAM181A** [Carassius auratus].  
105..119

MMSSDSEVKTLLNFVNLAASDIKAALDRSAPCRRSVDHRKYLQKQLKRFSHRYAKMPCRCHPHRNGDSAL  
AKLSEEKAPRGTGTGRDVSAGSEDEARSQGGQIPMPMRKRQLPASFWKEPQSSSGTRERLERFLKNNASATGHVR  
TPAVNDEKRKMVFDDSKANPLLSGSAACACSCCSLPYRALHSRFLPHADAPFRSRVEPAHSFSAGQQRSSAHVV  
IKPIPTKPALSSSSSSSVFSVFGF PMRKRQLPASFWKEP

rs:XP\_026086757 [XP\_026086757] transcriptional coactivator YAP1 isoform  
X1 [Carassius auratus]. 45..59

MDPSQHNPAGHQIVHVRGDSETDLEALFNAVMPKNAISPPSVPMRMRKLPDSFFKPPPEPKSHSRQAS  
TDAGTAGTLTPQHVRHSSPASLQLGAVSPGNLSSMGPANAPPQHLRQSSYEIPDDVPLPPGWEMAKTPSGQRYF  
LNHNDQTTTWQDPRKALLQMNQAAPASPVPVQQNIMNPASGPLPDGWEQAITSEGEIYYINHKNKTTSWLDPRL  
DPYAMNPQRISQSAPVKQGSQLPSSPQSGVLGANNQIRLQQIQMEKERLRIKQELLRQRPQELALRNQLPTSME  
QDGGTQNPVSSPGMGQDARNMTTNSDPFLNSGTYHSRDESTDSGLSMSSYSVPRTPDFFLNSVDEMETGDTLVP  
SSMATQPSRFPDYLDALPGTDVDLGTLEGESMAVEGEELMPSLQEQALSSDILNDMETVLAATKIDKENFLTWL  
PMRMRKLPDSFFKPP

rs:XP\_026086758 [XP\_026086758] transcriptional coactivator YAP1 isoform  
X2 [Carassius auratus]. 45..59

MDPSQHNPAGHQIVHVRGDSETDLEALFNAVMPKNAISPPSVPMRMRKLPDSFFKPPPEPKSHSRQAS  
TDAGTAGTLTPQHVRHSSPASLQLGAVSPGNLSSMGPANAPPQHLRQSSYEIPDDVPLPPGWEMAKTPSGQRYF  
LNHNDQTTTWQDPRKALLQMNQAAPASPVPVQQNIMNPASAMNPQRISQSAPVKQGSQLPSSPQSGVLGANNQI  
RLQQIQMEKERLRIKQELLRQRPQELALRNQLPTSMEQDGGTQNPVSSPGMGQDARNMTTNSDPFLNSGTYHSR  
DESTDSGLSMSSYSVPRTPDFFLNSVDEMETGDTLVPSSMATQPSRFPDYLDALPGTDVDLGTLEGESMAVEGEE  
LMPSLQEQALSSDILNDMETVLAATKIDKENFLTWL PMRMRKLPDSFFKPP

rs:XP\_026288711 [XP\_026288711] transcriptional coactivator YAP1 isoform  
X1 [Frankliniella occidentalis]. 43..57

MSLNPDSGEKQQEVVLERDSETELQALFEIVLKPNAKRPLQKPMHMRKLPNSFFNPPSTGSKSPSVSHS  
RENSADSAFANSLAGVVVPTVSSSGLPVSHPRHHSSPASLQQTYGAPPSAAQSPTQGPVSPGAQPIQHLKARSYD  
MTQVDELGPLPPGWEKAHTLEGQIYFLNHTTQTTTWEDPRKSLAAQAQRQQQSAELLTTPAALTLTHPHPAVSP  
LPKAPSTPKPASPAPNELGPLPDGWEEAATPEGEIYYIDHKNHSTSWFDPRI PSHLQRPFGAGSTLATWQAITQS  
QSLQSLQTDQRLQSLHLECEKLRQEQEIMRQQELMRQHANDIATS GMDPFLGLADHSRQESNDSGLGLGPLPHT  
PDFSYSMEDNMDGVSEGVGGLDTPDLSSLDPSDDLVLASLQLSDDFLEDVQALINPLNSSSKTDNVLTWL  
PMHMRKLPNSFFNPP

rs:XP\_026288712 [XP\_026288712] transcriptional coactivator YAP1 isoform  
X2 [Frankliniella occidentalis]. 43..57

MSLNPDSGEKQQEVVLERDSETELQALFEIVLKPNAKRPLQKPMHMRKLPNSFFNPPSTGSKSPSVSHS  
RENSADSAFANSLAGVVVPTVSSSGLPVSHPRHHSSPASLQQTYGAPPSAAQSPTQGPVSPGAQPIQHLKARSYD  
MTQVDELGPLPPGWEKAHTLEGQIYFLNHTTQTTTWEDPRKSLAAQAQRQQQSAELLTTPAALTLTHPHPAVSP  
LPKAPSTPKPASPAPNELGPLPDGWEEAATPEGEIYYIDHKNHSTSWFDPRI PSHLQRPFGAGSTLATWQAITQS  
QSLQSLQTDQRLQSLHLECEKLRQEQEIMRQQELMRQHANDIATS GMDPFLGLADHSRQESNDSGLGLGPLPHT  
PDFSYSMEDNMDGVSEGVGGLDTPDLSSLDPSDDLVLASLQLSDDFLEDVQALINPLNSSSKTDNVLTWL  
PMHMRKLPNSFFNPP

rs:XP\_026298946 [XP\_026298946] transcriptional coactivator YAP1 isoform  
X1 [Apis mellifera]. 46..60

MALNQDVDQLSKSNLVVRIDQNSESDLQALFDSVLKPD SKRPLQVPLMRNL PDSFFNPPSTGSKSPSI  
SHSRENSADSAFGTAAAAA AVGGGPTPGGNATGTPATGAAGAATGGSGNSAGSGSNAAGAAAAGLTVAH  
HSSPASLQQTYASAQQAPQHAPQPHARHHHHQKORSYDVI STVDDLGLPLPHGWEQARTPEGQIYFLNHLTRTTW  
EDPRKTA AANVA AVAAVDNGKSS T GATNSLGLPDGW EQARTPEGEIYFINHQTRTTSWFDPRI RKFPI LRIE  
SFTLVSFILDNHFPDRI INNNCAHVSATHLQ RAPTSGAMLPQNW LQQQPTGGGIQNNQTLQACQQKLR LQSLQ  
MERERLQ RQEQEI IRQQELMLRQSTTDAAMD PFLSGINEQHARQESAD SGLGLGSAYS LPHTPEDFLANIDDNMD  
GTS DGGAPMETPDLSTLSDNIDSTDDL VPSLQLSEDFSSDILDDVQSLINPNTTKPENVLTWL  
PLMRNL PDSFFNPP

rs:XP\_391844 [XP\_391844] transcriptional coactivator YAP1 isoform X2  
[Apis mellifera].>rs:XP\_003697329 [XP\_003697329] PREDICTED: transcriptional  
coactivator YAP1 [Apis florea].>rs:XP\_016914961 [XP\_016914961] PREDICTED:  
transcriptional coactivator YAP1 [Apis cerana].46..60

MALNQDVDQLSKSNLVVRIDQNSESDLQALFDSVLKPD SKRPLQVPLMRNL PDSFFNPPSTGSKSPSI  
SHSRENSADSAFGTAAAAA AVGGGPTPGGNATGTPATGAAGAATGGSGNSAGSGSNAAGAAAAGLTVAH  
HSSPASLQQTYASAQQAPQHAPQPHARHHHHQKORSYDVI STVDDLGLPLPHGWEQARTPEGQIYFLNHLTRTTW  
EDPRKTA AANVA AVAAVDNGKSS T GATNSLGLPDGW EQARTPEGEIYFINHQTRTTSWFDPRI PTHLQ RAPT  
SGAMLPQNW LQQQPTGGGIQNNQTLQACQQKLR LQSLQMERERLQ RQEQEI IRQQELMLRQSTTDAAMD PFLSG  
INEQHARQESAD SGLGLGSAYS LPHTPEDFLANIDDNMDGTS DGGAPMETPDLSTLSDNIDSTDDL VPSLQLSE  
FSSDILDDVQSLINPNTTKPENVLTWL PLMRNL PDSFFNPP

rs:XP\_023061095 [XP\_023061095] protein **FAM181A** [Piliocolobus  
tephrosceles]. 129..143

MASDSDVKMLLNFNVLASSDIKAALDKSAPCRRSVDHRKYLQKQLKRFSQKYSRLPRGLPGRAAEPYLK  
RGSEDQPGRLLLDLGPDSSPGGGGCKEKALRNYPYREECLAKEQLPQGQHPEAAQPGQVPMRKRQLPASFWEEP  
PTHSYHVGLGGLGPREGPPYEGKKNCKGLEPLGPEIVPVPMSPRALAEKEPLKMPGVSLVGRVNAWSCC PFQYH  
GQPIYPAPL GALPQSPVPSLGLWKKSPA FPGEL AHLCKDADGLGQKVC RPVVLKPIPTKPAVPPPIFNVFGYL  
PMRKRQLPASFWEEP

rs:XP\_023063876 [XP\_023063876] transcriptional coactivator YAP1 isoform  
X1 [Piliocolobus tephrosceles]. 85..99

MDPGQQPPQPAPQGGQPPAQPPQGGQPPSGPGQPAPAATQAAPQAPPAGHQIVHVRGDSETDLEALF  
NAVMPKTANVPQTVPMRLRKL PDSFFKPEPKSHSRQASTDAGTAGALTPQH VRAHSSPASLQLGAVSPGTLTP  
AGVVS GPAATPTA QHLRQSSFEIPDDVPLPAGWEMAKTSSGQRYFLNHIDQTTTWQDPRKAMLSQMNVTAPTSP  
VQQNMMNSASGPLPDGW EQAMTQDGEIYYINHKNTTSWLDPRLDPRFAMNQRISQSAPVKQPPPLAPQSPQGGV  
MGGSNSNQQQMRLQQLQMEKERLR LKQQELLRQVRPQELALRSQLPTLEQDGGTQNPVSSPGMSQELRTMTTNS  
SDPFLNSGTYHSRDESTDSGLSMSSYSVPRTPDDFLNSVDEM DTGDTINQSTLPSQQNRFPDYLEAIPGTNVLDL  
TLEGDMNIEGEELMPSLQEALSSDILNDMESVLAATKLDKESFLTWL PMRLRKL PDSFFKPP

rs:XP\_023063877 [XP\_023063877] transcriptional coactivator YAP1 isoform X2 [Piliocolobus tephrosceles]. 85..99

MDPGQQPPQPAPQGGQPPAQPPQGGQPPSGPGQPAPAATQAAPQAPPAGHQIVHVRGDSETDLEALF  
NAVMPKNTANVPQTVPMRLRKLKLPDSFFKPPPEPKSHSRQASTDAGTAGALTPQHVRHSSPASLQLGAVSPGTLTP  
AGVVSGPAATPTAQHLRQSSFEIPDDVPLPAGWEMAKTSSGQRYFLNHIDQTTTQWQDPRKAMLSQMNVTAPTSPP  
VQQNMMNSASGPLPDGWEQAMTQDGEIYYINHKNTTSWLDPRLDPRFAMNQRISSAPVKQPPPLAPQSPQGGV  
MGGNSNSNQQQQMRLQQLQMEKERLRLKQQLLRLQELALRSQLEPTLEQDGGTQNPVSSPGMSQELRTMTTNSDDPF  
LNSGTYHSRDESTDSGLSMSSYSVPRTPDDFLNSVDEMMDTGDITNQSTLPSQQNRFPDYLEAIPGTNVLDLGTLEG  
DGMNIEGEELMPSLQEQALSSDILNDMESVLAATKLDKESFLTWL PMRLRKLKLPDSFFKPP

rs:XP\_023063878 [XP\_023063878] transcriptional coactivator YAP1 isoform X3 [Piliocolobus tephrosceles]. 85..99

MDPGQQPPQPAPQGGQPPAQPPQGGQPPSGPGQPAPAATQAAPQAPPAGHQIVHVRGDSETDLEALF  
NAVMPKNTANVPQTVPMRLRKLKLPDSFFKPPPEPKSHSRQASTDAGTAGALTPQHVRHSSPASLQLGAVSPGTLTP  
AGVVSGPAATPTAQHLRQSSFEIPDDVPLPAGWEMAKTSSGQRYFLNHIDQTTTQWQDPRKAMLSQMNVTAPTSPP  
VQQNMMNSASGPLPDGWEQAMTQDGEIYYINHKNTTSWLDPRLDPRFAMNQRISSAPVKQPPPLAPQSPQGGV  
MGGNSNSNQQQQMRLQQLQMEKERLRLKQQLLRLQELALRSQLEPTLEQDGGTQNPVSSPGMSQELRTMTTNSDDPF  
LNSGTYHSRDESTDSGLSMSSYSVPRTPDDFLNSVDEMMDTGDITNQSTLPSQQNRFPDYLEAIPGTNVLDLGTLEG  
DGMNIEGEELMPSLQEQALSSDILNDMESVLAATKLDKESFLTWL PMRLRKLKLPDSFFKPP

rs:XP\_023064899 [XP\_023064899] protein **FAM181B** [Piliocolobus tephrosceles]. 221..235

MAVQAALLSTHPFVFPFGGGSPDGLGGAFGALDKGCCFEDDETGAPAGALLSGAEGGDVREATRDLLSF  
IDSASSNIKLALDKPGKSKRKNVHRKYLQKQIKRCSGLMGAVPPGPPSPSAADTPAKRPLAAPSAPTVAAPAHGK  
AVPRREASQAAAAASLQSRSLAALFDSLHRVPGGAEPAGGAVVAVVAGLGGSGTGGAGGDAAGPAGATAVPGARK  
VPLRARNLPPSFFTEPSRAGGSGCGSPGPDVSLGDLEKGAEEVEFFELLGPDYAGGTEAAVLLAAEPLDVFPAGT  
SVLRGPPPELESGLFDPAPAVVGNLLYPEPWSVPGCPPTKKSPLTAPRGGLTLNEPLRPLYPAAADSPPGGEDGPGH  
LASFSPPFFPDCALPPPPPPHQQVSYDYSAGYSRNAYSSLWRPDGVWEGAPGEEGAHRD PLRARNLPPSFFTEP

rs:XP\_026487878 [XP\_026487878] transcriptional coactivator YAP1 isoform X1 [Vanessa tameamea]. 44..58

MALNSDGEQKSNLVLVRVDQSDSVLQSLFDTVLKPDSCRPLQVPLRMRQLPKSFFNPPSTGSKSPSVSH  
SRENSADSAFGSSSATGAAPVSHSRAHSSPASLQQTAAAGQQNQPPPLPHQHAKQRSYDVGTHIPDDLGLPLPAGW  
EQARTPEGQIYYLNHITKTTTWEDPRKTLAAQTVAAGVQHQSAAEALLTQTPAPQPIPPATPAKSTSTNTTTDPL  
GPLPDGWEQATTPEGEIYFINHAARTTSWFDPRIPQHLQRTPAAGASAAGGGWANASIQACQQKLRQLQLERER  
RLKQRQQEIRLQQLMARQSSSIVSSLASSTGTASTDLPLDPFLSGLTDHQRQESADSGLGMVAVTQSSYSMPHTPE  
EDFLAGMDDRMDCSTSEAGANLDTADITLGDITLDDLVPSLQQLGFEFTNDILLDDVQSLINSTPSKPENVTWL  
PLRMRQLPKSFFNPP

rs:XP\_026487879 [XP\_026487879] transcriptional coactivator YAP1 isoform X2 [Vanessa tameamea]. 44..58

MALNSDGEQKSNLVLVRVDQSDSVLQSLFDTVLKPDSCRPLQVPLRMRQLPKSFFNPPSTGSKSPSVSH  
SRENSADSAFGSSSATGAAPVSHSRAHSSPASLQQTAAAGQQNQPPPLPHQHAKQRSYDVGTHIPDDLGLPLPAGW  
EQARTPEGQIYYLNHITKTTTWEDPRKTLAAQTVAAGVQHQSAAEALLTQTPAPQPIPPATPAKSTSTNTTTDPL  
PLPDGWEQATTPEGEIYFINHAARTTSWFDPRIPQHLQRTPAAGASAAGGGWANASIQACQQKLRQLQLERER  
LKQRQQEIRLQQLMARQSSSIVSSLASSTGTASTDLPLDPFLSGLTDHQRQESADSGLGMVAVTQSSYSMPHTPE  
DFLAGMDDRMDCSTSEAGANLDTADITLGDITLDDLVPSLQQLGFEFTNDILLDDVQSLINSTPSKPENVTWL  
PLRMRQLPKSFFNPP

rs:XP\_026487880 [XP\_026487880] transcriptional coactivator YAP1 isoform X3 [Vanessa tameamea]. 44..58

MALNSDGEQKSNLVLVRVDQSDSVLQSLFDTVLKPDSCRPLQVPLRMRQLPKSFFNPPSTGSKSPSVSH  
SRENSADSAFGSSSATGAAPVSHSRAHSSPASLQQTAAAGQQNQPPPLPHQHAKQRSYDVGTHIPDDLGLPLPAGW  
EQARTPEGQIYYLNHITKTTTWEDPRKTLAAQTVAAGVQHQSAAEALLTQTPAPQPIPPATPAKSTSTNTTTDPL  
GPLPDGWEQATTPEGEIYFINHAARTTSWFDPRIPQHLQRTPAAGASAAGGGWANASIQACQQKLRQLQLERER  
LKQRQQEIRLQQLMARQSSSIVSSLASSTGTASTDLPLDPFLSGLTDHQRQESADSGLGMVAVTQSSYSMPHTPE  
DFLAGMDDRMDCSTSEAGANLDTADITLGDITLDDLVPSLQQLGFEFTNDILLDDVQSLINSTPSKPENVTWL  
PLRMRQLPKSFFNPP

rs:XP\_026487882 [XP\_026487882] transcriptional coactivator YAP1 isoform X4 [Vanessa tameamea]. 44..58

MALNSDGEQKSNLVLVRVDQSDSVLQSLFDTVLKPDSCRPLQVPLMRQLPKSFFNPPSTGSKSPSVSH  
SRENSADSAFGSSSATGAAPVSHSRAHSSPASLQQTAAAGQONQOPPLPHQHAKQRSYDVGTHIPDDLGLPLPAGW  
EQARTPEGQIYYLNHITKTTTWEDPRKTLAAQTVAAGVQHQSAAEALLTQTPAPQPIPPATPAKSTSTNTTDDPL  
GPLPDGWEQATTPEGEIYFINHAARTTSWFDPRIPQHLQRTPAAGASAAAGGGWANASIQACQQLRQLSLQLERE  
RLKQRQQEIRLQQELMARQSSSIVSSLASSTGTASTDLPLDPFLSGLTDHQRQESADSGLGMMAVTQSSYSMPHTP  
EDFLAGMDDRMDCSTSEAGANLDTADITLGDITDILLDDVQSLINSTPSKPENVLTWL  
PLMRQLPKSFFNPP

rs:XP\_026487883 [XP\_026487883] transcriptional coactivator yorkie isoform X5 [Vanessa tameamea]. 44..58

MALNSDGEQKSNLVLVRVDQSDSVLQSLFDTVLKPDSCRPLQVPLMRQLPKSFFNPPSTGSKSPSVSH  
SRENSADSAFGSSSATGAAPVSHSRAHSSPASLQQTAAAGQONQOPPLPHQHAKQRSYDVGTHIPDDLGLPLPAGW  
EQARTPEGQIYYLNHITKTTTWEDPRKTLAAQTVAAGVQHQSAAEALLTQTPAPQPIPPATPAQHLQRTPAAGASA  
AGGGWANASIQACQQLRQLSLQLERERLQQRQQEIRLQQELMARQSSSIVSSLASSTGTASTDLPLDPFLSGLT  
DHQRQESADSGLGMMAVTQSSYSMPHTPEDFLAGMDDRMDCSTSEAGANLDTADITLGDITDILLDDVQSLINSTPSKPENVLTWL  
PLMRQLPKSFFNPP

rs:XP\_026487884 [XP\_026487884] transcriptional coactivator yorkie isoform X6 [Vanessa tameamea]. 44..58

MALNSDGEQKSNLVLVRVDQSDSVLQSLFDTVLKPDSCRPLQVPLMRQLPKSFFNPPSTGSKSPSVSH  
SRENSADSAFGSSSATGAAPVSHSRAHSSPASLQQTAAAGQONQOPPLPHQHAKQRSYDVGTHIPDDLGLPLPAGW  
EQARTPEGQIYYLNHITKTTTWEDPRKTLAAQTVAAGVQHQSAAEALLTQTPAPQPIPPATPAQHLQRTPAAGASA  
AGGGWANASIQACQQLRQLSLQLERERLQQRQQEIRLQQELMARQSSSIVSSLASSTGTASTDLPLDPFLSGLT  
DHQRQESADSGLGMMAVTQSSYSMPHTPEDFLAGMDDRMDCSTSEAGANLDTADITLGDITDILLDDVQSLINSTPSKPENVLTWL  
PLMRQLPKSFFNPP

rs:XP\_026487885 [XP\_026487885] transcriptional coactivator yorkie isoform X7 [Vanessa tameamea]. 44..58

MALNSDGEQKSNLVLVRVDQSDSVLQSLFDTVLKPDSCRPLQVPLMRQLPKSFFNPPSTGSKSPSVSH  
SRENSADSAFGSSSATGAAPVSHSRAHSSPASLQQTAAAGQONQOPPLPHQHAKQRSYDVGTHIPDDLGLPLPAGW  
EQARTPEGQIYYLNHITKTTTWEDPRKTLAAQTVAAGVQHQSAAEALLTQTPAPQPIPPATPAQHLQRTPAAGASA  
AGGGWANASIQACQQLRQLSLQLERERLQQRQQEIRLQQELMARQSSSIVSSLASSTGTASTDLPLDPFLSGLT  
DHQRQESADSGLGMMAVTQSSYSMPHTPEDFLAGMDDRMDCSTSEAGANLDTADITLGDITDILLDDVQSLINSTPSKPENVLTWL  
PLMRQLPKSFFNPP

rs:XP\_026506573 [XP\_026506573] uncharacterized protein LOC113406358 [Terrapene mexicana trianguis]. 205..219

MAAGVIRNLAEFRLPSSFQHSFLHPTPSQDMDFQDLSEEEEEEDYDVEEDSPPCHSPGTEGQKVTAGC  
SQSDAEMTLQLLKFSELIQRYFGRKAKDEDPDSCNIYEDCFSPRRLGRELYYADLMRLAQSGELDDEDAQG  
PAAPPQQLDQVRVRSICNKDGAQKLGPLAELFEYGLRRFLKRRRAADGRKLRLEKKYAHIMPMHKRKLQPSFWKEP  
SPGPLCILNTNPPDFSDLLANWTSEPGQELPSTGRELAGELARPAMETDQFSVL PMHKRKLQPSFWKEP

rs:XP\_024052888 [XP\_024052888] protein **FAM181A** [Terrapene mexicana trianguis]. 126..140

MASDSEVKTLLNFVNLAASSDIKAALDKSAPCRRSVDHRKYLQKQLKRFSQKYSRIPRCHPSKSMESSK  
RGAEDRNRSSDPDGPDPNHCRASSSEKALRLSEVEENFSGGQVLQEQSPESVSRPDQVPMRKRQLPASFWEEP  
SLLVGSFPAGLDGLPNRDLPPYEGKSKKGPDTTEPGSPPLPAQPSGEKEPIKVPGTSLSGRMNAWSCPFQYH  
GQPVYQTPGALPQSPFPGLGLWRKSTAPAGEIQHFCKEAGSMGQKLYRPVVLKPIPTKPAVPPPIFNVFGYI  
PMRKRQLPASFWEEP

rs:XP\_024072236 [XP\_024072236] protein **FAM181B** [Terrapene mexicana trianguis]. 200..214

MAVQAAILNPHHFI PFCFPASGGLADYVDLEKSYEDGGAALLGGGGGGVGGGEDPGDFKEATRDLLSFI  
DSASSNIKALDKPVKSKRKVNHRKYLQKQIKRGTGIIASAPAAPAPAGGQELPKRPAPPAGAASPQSPCPGPA  
GHCKPPAKREASQAASSLQSKSLAALFDSLHQGRAGEKGPAGGGGGGGGGPRKVP LNRNLPSPFFTEPAAPPP  
RAPPLGASPKALERGGGSPEAAEFFELLGPDYGGLLPEQPPAQEAFFPARLPPELGMPEALYEPHLLPPLPPLLGG

MLYPEPAWSPPAKKSPPAAAPCSSLSLPETLRPLPALGAPGAPLYPASSDPAPAGGEESPAHLAAAFAPYFPDCP  
LPPPPAMPYEYSAGYNRVAYSGL PLRNRNLPPSFFTEP

rs:XP\_024071425 [XP\_024071425] transcriptional coactivator YAP1 isoform  
X3 [Terrapene mexicana triunguis]. 73..87

MDPGQPQQQAQPPAQQQAPPPGAPSGAGQTPGAGPPPAGHQIVHVVRGDSETDLEALFNAVMPKGANVP  
HTLPMRLRKLKLPDSFFKPPPEPKAHSRQASTDAGSAGALTPQHVRHSSPASLQLGAVSPGTLTPSGVVTGPGAAPS  
SQHLRQSSFEIPDDVPLPPGWEMAKTPSGQRYFLNHIDQTTTWQDPRKAILSQMNVTAPTSPVQQNIMNSASGP  
LPDGWEQAMTQDGEIYYINHKNKTTSWLDPRLDPRFAMNQRIQSAPVKQPPPLAPQSPQGGVMGGGSSNQQQM  
RLQQLQMEKERLRLKHQELLRQVRPQELALRSQLPTMEQDGGSQNPVSSPGMAQDLRTMTTNSSDPFLNSGTYHS  
RDESTDSGLSMSSYSVPRTPDDFLNSVDEMDTGDISQSNIPSHQNRFPDYLEAIPGTNVLDLGTLEGDGMNIEGEE  
LMPSLQEALSSDILNDMESVLAATKLDKESFLTWL PMRLRKLKLPDSFFKPP

rs:XP\_024071426 [XP\_024071426] transcriptional coactivator YAP1 isoform  
X4 [Terrapene mexicana triunguis]. 73..87

MDPGQPQQQAQPPAQQQAPPPGAPSGAGQTPGAGPPPAGHQIVHVVRGDSETDLEALFNAVMPKGANVP  
HTLPMRLRKLKLPDSFFKPPPEPKAHSRQASTDAGSAGALTPQHVRHSSPASLQLGAVSPGTLTPSGVVTGPGAAPS  
SQHLRQSSFEIPDDVPLPPGWEMAKTPSGQRYFLNHIDQTTTWQDPRKAILSQMNVTAPTSPVQQNIMNSASGP  
LPDGWEQAMTQDGEIYYINHKNKTTSWLDPRLDPRFAMNQRIQSAPVKQPPPLAPQSPQGGVMGGGSSNQQQM  
RLQQLQMEKERLRLKHQELLRQELALRSQLPTMEQDGGSQNPVSSPGMAQDLRTMTTNSSDPFLNSGTYHSRDES  
TDSGLSMSSYSVPRTPDDFLNSVDEMDTGDISQSNIPSHQNRFPDYLEAIPGTNVLDLGTLEGDGMNIEGEE  
LMPSLQEALSSDILNDMESVLAATKLDKESFLTWL PMRLRKLKLPDSFFKPP

rs:XP\_024071429 [XP\_024071429] transcriptional coactivator YAP1 isoform  
X5 [Terrapene mexicana triunguis]. 73..87

MDPGQPQQQAQPPAQQQAPPPGAPSGAGQTPGAGPPPAGHQIVHVVRGDSETDLEALFNAVMPKGANVP  
HTLPMRLRKLKLPDSFFKPPPEPKAHSRQASTDAGSAGALTPQHVRHSSPASLQLGAVSPGTLTPSGVVTGPGAAPS  
SQHLRQSSFEIPDDVPLPPGWEMAKTPSGQRYFLNHIDQTTTWQDPRKAILSQMNVTAPTSPVQQNIMNSASAM  
NQRIQSAPVKQPPPLAPQSPQGGVMGGGSSNQQQMRLQQLQMEKERLRLKHQELLRQVRPQELALRSQLPTME  
QDGGSQNPVSSPGMAQDLRTMTTNSSDPFLNSGTYHSRDESTDSGLSMSSYSVPRTPDDFLNSVDEMDTGDISQS  
NIPSHQNRFPDYLEAIPGTNVLDLGTLEGDGMNIEGEEELMPSLQEALSSDILNDMESVLAATKLDKESFLTWL  
PMRLRKLKLPDSFFKPP

rs:XP\_024071430 [XP\_024071430] transcriptional coactivator YAP1 isoform  
X6 [Terrapene mexicana triunguis]. 73..87

MDPGQPQQQAQPPAQQQAPPPGAPSGAGQTPGAGPPPAGHQIVHVVRGDSETDLEALFNAVMPKGANVP  
HTLPMRLRKLKLPDSFFKPPPEPKAHSRQASTDAGSAGALTPQHVRHSSPASLQLGAVSPGTLTPSGVVTGPGAAPS  
SQHLRQSSFEIPDDVPLPPGWEMAKTPSGQRYFLNHIDQTTTWQDPRKAILSQMNVTAPTSPVQQNIMNSASAM  
NQRIQSAPVKQPPPLAPQSPQGGVMGGGSSNQQQMRLQQLQMEKERLRLKHQELLRQELALRSQLPTMEQDGG  
SQNPVSSPGMAQDLRTMTTNSSDPFLNSGTYHSRDESTDSGLSMSSYSVPRTPDDFLNSVDEMDTGDISQSNIPS  
HQNRFDPDYLEAIPGTNVLDLGTLEGDGMNIEGEEELMPSLQEALSSDILNDMESVLAATKLDKESFLTWL  
PMRLRKLKLPDSFFKPP

rs:XP\_005343545 [XP\_005343545] protein **FAM181A** [Microtus ochrogaster].  
129..143

MAADSDVKMLLNFNVLASSDIKAALDKSAPCRRSVDHRKYLQKQLKRFSQKYSRFRPGLPGRVMEPHLP  
RGPEERPGQLPLHPCPESSPGGDGCCKEKALGTPFREECLSKEQSFGGLNAEAARPGQVPMRKRQLPASFWEEP  
PTLSYPMGLEVLTPREASLYENKKNCKGLES LGPETTPLPMSPRVLADTEPLKMSGVSLVGS LDAWSYCFQYH  
GQPIFPSLPGVLPQGPVPSLGLWRKSPASPVELTHFCKDVDNPGPKVHRPVVLKPIPTKPAMPPPLFNVFGYL  
PMRKRQLPASFWEEP

rs:XP\_005357663 [XP\_005357663] protein **FAM181B** [Microtus ochrogaster].  
218..232

MAVQAALLSSHPIPFPGFGGSAEGLVSAFGSLDKGCCFEDDES GAPAGALLSASEGGDVREATRDLLSF  
IDSASSNIKLALDKPGKSKRVNHRKYLQKQIKRCSGLMGTAPPGPSAPDAPAKRPPGAPGAPTVAAPAHCK  
STPRREATQAAAAASLQSRSLAALFDSLHQVPGGAEPASGGVTVVPVPLGAANAAGDGAATTGSSAAPGTRKVP  
L RARNLPPSFFTEPSRVSGSGGGTGGSGCGCGPSGQVSLGDLEKGAEAVEFFELLAPDFCAGNESGVLLAAEPLD  
AFPAGATVLRGPLELESGPFEPAMVGNLLYPEPWSAPSCPQTKKPLAGVRSGLTLNEPVRLLYPTALDPSGGE  
DTTALASFPPFFPCALPPPHQVSYDYSAGYSRAVYPNLWRPDGVWEGASGEDGAHPD PLRARNLPPSFFTEP

rs:XP\_005346865 [XP\_005346865] transcriptional coactivator YAP1, partial [Microtus ochrogaster]. 48..62

PPGTPAAPPAPPAGHQVVHVRGDSETDLEALFNAVMNPKTANVPQTVPMRLRKLKLPDSFFKPPPEPKSHSR  
QASTDASTAGALTPQHVRHSSPASLQLGAVSPGTLTPTVVSGATTAAQHLRQSSFEIPDDVPLPAGWEMAKTS  
SGQRYFLNHIDQTTTWQDPRKAMLSQLNVPASASPAVPQTLMNAASGPLPDGWEQAMTQDGDVYYINHKNKTTSW  
LDPRLDPRFAMNQIRITQSAPVKQPPPLAPQSPQGSVLGGGNSNQQQQMQLQQLQMEKERLRLKQQLLRQAIRNI  
NPSTANAPKCQELALRSQLEPTLEQDGGTQNAVSSGMSQELRTMTTNSSDPFLNSGTYHSRDESTDSGLSMSSYSV  
PRTPDDFLNSVDEMDDTGTINQSTLPSQQSRFPDYLEAIPGTNVDLGTLEGDAMNIEGEEELMPSLQEQALSSDILN  
DMESVLAATKLDKESFLTWL PMRLRKLKLPDSFFKPP

rs:XP\_014119473 [XP\_014119473] transcriptional coactivator YAP1 isoform X1 [Zonotrichia albicollis]. 86..100

MDPGQPQTQQPPQAAQPPASQQQQPPPQPPGPVTGAPAGAAQPPGAGPPPAGHQIVHVRGDSETDLEAL  
FNAVMNPKGANVPHTLPMRLRKLKLPDSFFKPPPEPKAHSRQASTDAGTAGALTPQHVRHSSPASLQLGAVSPGTLT  
PSGVVTGPGAPSSQHLRQSSFEIPDDVPLPPGWEMAKTSPGQRYFLNHIDQTTTWQDPRKAMLSQMNVTAPTSPS  
VQQNIMNSASGPLPDGWEQAMTQDGEIYYINHKNKTTSWLDPRLDPRFAMNQIRISQSAPVKQPPPLAPQSPQGGV  
MGGSSSNQQQQMRLQQLQMEKERLRLKHQELLRQVRPQALRNINPSTANSFKHQELALRSQLEPTMEQDGGSQNPV  
SSPGMSQELRTMTTNSSDPFLNSGTYHSRDESTDSGLSMSSYSVPRTPDDDFLNSVDEMDDTGD SIGQSNIPSHQNR  
FPDYLEAIPGTNVDLGTLEGDGMNIEGEEELMPSLQEQALSSDILN DMESVLAATKLDKESFLTWL  
PMRLRKLKLPDSFFKPP

rs:XP\_005482648 [XP\_005482648] transcriptional coactivator YAP1 isoform X2 [Zonotrichia albicollis]. 86..100

MDPGQPQTQQPPQAAQPPASQQQQPPPQPPGPVTGAPAGAAQPPGAGPPPAGHQIVHVRGDSETDLEAL  
FNAVMNPKGANVPHTLPMRLRKLKLPDSFFKPPPEPKAHSRQASTDAGTAGALTPQHVRHSSPASLQLGAVSPGTLT  
PSGVVTGPGAPSSQHLRQSSFEIPDDVPLPPGWEMAKTSPGQRYFLNHIDQTTTWQDPRKAMLSQMNVTAPTSPS  
VQQNIMNSASGPLPDGWEQAMTQDGEIYYINHKNKTTSWLDPRLDPRFAMNQIRISQSAPVKQPPPLAPQSPQGGV  
MGGSSSNQQQQMRLQQLQMEKERLRLKHQELLRQALRNINPSTANSFKHQELALRSQLEPTMEQDGGSQNPVSSPG  
MSQELRTMTTNSSDPFLNSGTYHSRDESTDSGLSMSSYSVPRTPDDDFLNSVDEMDDTGD SIGQSNIPSHQNRFPDY  
LEAIPGTNVDLGTLEGDGMNIEGEEELMPSLQEQALSSDILN DMESVLAATKLDKESFLTWL  
PMRLRKLKLPDSFFKPP

rs:XP\_014119474 [XP\_014119474] transcriptional coactivator YAP1 isoform X3 [Zonotrichia albicollis]. 86..100

MDPGQPQTQQPPQAAQPPASQQQQPPPQPPGPVTGAPAGAAQPPGAGPPPAGHQIVHVRGDSETDLEAL  
FNAVMNPKGANVPHTLPMRLRKLKLPDSFFKPPPEPKAHSRQASTDAGTAGALTPQHVRHSSPASLQLGAVSPGTLT  
PSGVVTGPGAPSSQHLRQSSFEIPDDVPLPPGWEMAKTSPGQRYFLNHIDQTTTWQDPRKAMLSQMNVTAPTSPS  
VQQNIMNSASGPLPDGWEQAMTQDGEIYYINHKNKTTSWLDPRLDPRFAMNQIRISQSAPVKQPPPLAPQSPQGGV  
MGGSSSNQQQQMRLQQLQMEKERLRLKHQELLRQVRPQELALRSQLEPTMEQDGGSQNPVSSPGMSQELRTMTTNS  
SDPFLNSGTYHSRDESTDSGLSMSSYSVPRTPDDDFLNSVDEMDDTGD SIGQSNIPSHQNRFPDYLEAIPGTNVDLGT  
LEGDGMNIEGEEELMPSLQEQALSSDILN DMESVLAATKLDKESFLTWL PMRLRKLKLPDSFFKPP

rs:XP\_014119475 [XP\_014119475] transcriptional coactivator YAP1 isoform X4 [Zonotrichia albicollis]. 86..100

MDPGQPQTQQPPQAAQPPASQQQQPPPQPPGPVTGAPAGAAQPPGAGPPPAGHQIVHVRGDSETDLEAL  
FNAVMNPKGANVPHTLPMRLRKLKLPDSFFKPPPEPKAHSRQASTDAGTAGALTPQHVRHSSPASLQLGAVSPGTLT  
PSGVVTGPGAPSSQHLRQSSFEIPDDVPLPPGWEMAKTSPGQRYFLNHIDQTTTWQDPRKAMLSQMNVTAPTSPS  
VQQNIMNSASGPLPDGWEQAMTQDGEIYYINHKNKTTSWLDPRLDPRFAMNQIRISQSAPVKQPPPLAPQSPQGGV  
MGGSSSNQQQQMRLQQLQMEKERLRLKHQELLRQELALRSQLEPTMEQDGGSQNPVSSPGMSQELRTMTTNSDPF  
LNSGTYHSRDESTDSGLSMSSYSVPRTPDDDFLNSVDEMDDTGD SIGQSNIPSHQNRFPDYLEAIPGTNVDLGTLEG  
DGMNIEGEEELMPSLQEQALSSDILN DMESVLAATKLDKESFLTWL PMRLRKLKLPDSFFKPP

rs:XP\_026667993 [XP\_026667993] protein vestigial-like, partial [Ceratina calcarata]. 192..206

MSCSEVMYQYYPYIYQRPAPPPHPSHPHAAPHTHPHANPHAAHSPARTAPFQSFSAATATHQYDRLNV  
QRSLGAAGIEICPAGGSVPQGPSSAGSVGSAPSPASPRPTPQPRPPLASTTAQPSRTLDDDRSTDAVGTGTAGE  
DSDDGESRAQYLNPNVVTHTYREDAASKVEEHFQRALAHDKKENISPMSMRNFPPSFWKHGPEVYEPDTPWHS  
HYSQYHHRVHDYQHPNMAAVTSYGGLLLGAARGLGPHAAHHAHPAASYKDWPSATPSQSLVDASTAPPYPHPGPA  
PLS PMSMRNFPPSFWKHP

rs:XP\_017881065 [XP\_017881065] protein vestigial-like, partial [Ceratina calcarata]. 17..31  
LANLKCKYWNTSENISPM SMRNFPSPFWKHPGEVY EYPTDPW HSHYSQYHHRVHDYQH PNM AAVTSYGG  
LLLGAARGLGPAAHHAH PAASYKDWPSATPSQSLVDASTAPPYPHGPYAPLSGFESQVQDSKDLYWF  
PMSMRNFPPSPFWKHP

rs:XP\_017883902 [XP\_017883902] transcriptional coactivator yorkie [Ceratina calcarata]. 46..60  
MALNQDQDVLKSNLVRIDQNSESDLQALFDSVLKPD SKRPLQVPLRMRNL PDSFFNPPSTGSKSPSI  
SHSRENSADSAFGTVA AVAAA VAGPTPGGNGSGTPATGAAGAATGGSGNSAGSGSNAAGAAA VAAAAAGLT  
VAHPRAHSSPASLQQT YASAQQAPQHAPQPHARHHHHQKQRSYDVI STVDDLGLPLPHGWEQARTPEGQIYFLNHL  
TRTTTWEDPRKTA AANVA AVAAVDNGKSTTGATNSLGLPLDGWEQARTPEGEIYFINHQTRTTSWFDPRIPHT  
LQRAPTS GAML PQNWLQQQQPTGGGIQNNQTLQACQQKLR LQSLQMERERL KQRQQEIMRQQELMLRQSTTDAAM  
DPFLSGINEQHARQESADSG LGLGSAYS LPHTPEDFLANIDDNMDGTS DGGAPMETPDLSTLSDNIDSTDDLVP S  
LQLED FSSDILDDVQSLINPNTTKAGNVLTWL PLRMRNL PDSFFNPP

rs:XP\_026705804 [XP\_026705804] protein **FAM181A** [Athene cunicularia]. 127..141  
MASDSEVKTL LN FVN LASSDIKAALDKSAPCRRSVDHRKYLQKQLKRFSQKYSRI PRCHPSK PSECGWR  
RVTEDRGRGPQPEAPDPS PHGGAASEKVLQAVEAEESLAGETVLQEQNPEAARPDQVPMRKRQLPASFWEEP RPT  
QSLPARAFPEGLPAPRDPPP YEGKKSRRSPDAAAPESPPEPAPHAGEKDPAGVLSGRVGAWTCCPFSCPGPGVYQ  
PPGALPPSPFPGLGLWRKSVATLPAEMPHFCKEADVTGQKLYRPVVLKPIPTKPAVPPPIFNVFEGYL  
PMRKRQLPASFWEEP

rs:XP\_026739446 [XP\_026739446] transcriptional coactivator YAP1-like isoform X1 [Trichoplusia ni]. 44..58  
MALNSDAEQSNL VLRVDQSDSVLQSLFDTVLPKPSRPLQVPLRMRQLPKSFFNPPSTGSKSPSVSH  
SRENSADSAFGSSSATGASPVSHSRAHSSPASLQQT YAAGQQTQQPPLHHQHTKQRSYDVGTHIPDDLGLPLPHGW  
EQARTPEGQIYYLNHITKTTTWDDPRKTLAAQSVAGSVQH QSSDALLTQATSPQTI PNT PAPA AKSTSSNTTTDP  
LGPLPEGWEQAATAEGEIYFINHAARTTSWFDPRIPQHLQRTPAAGGTGPEGVWANASLQACQQKLR LQSLQMER  
ERL KQRQQEIRIQQELIMSRQASSIVSS LASSAGAGNTELPD PFLSGLSEHQ RQESADSG LGMAVPHSY SMPPT  
PEGFLASMDDRMDCTSEAGANLDSTDMALADNLDSTDDLVP SLQLNEFTNDILLDDVQSLINSTPSKPDNVLTWL  
PLRMRQLPKSFFNPP

rs:XP\_026739447 [XP\_026739447] transcriptional coactivator YAP1-like isoform X2 [Trichoplusia ni]. 44..58  
MALNSDAEQSNL VLRVDQSDSVLQSLFDTVLPKPSRPLQVPLRMRQLPKSFFNPPSTGSKSPSVSH  
SRENSADSAFGSSSATGASPVSHSRAHSSPASLQQT YAAGQQTQQPPLHHQHTKQRSYDVGTHIPDDLGLPLPHGW  
EQARTPEGQIYYLNHITKTTTWDDPRKTLAAQSVAGSVQH QSSDALLTQATSPQTI PNT PAPA AKSTSSNTTTDPL  
GPLPEGWEQAATAEGEIYFINHAARTTSWFDPRIPQHLQRTPAAGGTGPEGVWANASLQACQQKLR LQSLQMER  
ERL KQRQQEIRIQQELIMSRQASSIVSS LASSAGAGNTELPD PFLSGLSEHQ RQESADSG LGMAVPHSY SMPPT  
EGFLASMDDRMDCTSEAGANLDSTDMALADNLDSTDDLVP SLQLNEFTNDILLDDVQSLINSTPSKPDNVLTWL  
PLRMRQLPKSFFNPP

rs:XP\_026739448 [XP\_026739448] transcriptional coactivator YAP1-like isoform X3 [Trichoplusia ni]. 44..58  
MALNSDAEQSNL VLRVDQSDSVLQSLFDTVLPKPSRPLQVPLRMRQLPKSFFNPPSTGSKSPSVSH  
SRENSADSAFGSSSATGASPVSHSRAHSSPASLQQT YAAGQQTQQPPLHHQHTKQRSYDVGTHIPDDLGLPLPHGW  
EQARTPEGQIYYLNHITKTTTWDDPRKTLAAQSVAGSVQH QSSDALLTQATSPQTI PNT PAPA AKSTSSNTTTDPL  
GPLPEGWEQAATAEGEIYFINHAARTTSWFDPRIPQHLQRTPAAGGTGPEGVWANASLQACQQKLR LQSLQMER  
ERL KQRQQEIRIQQELIMSRQASSIVSS LASSAGAGNTELPD PFLSGLSEHQ RQESADSG LGMAVPHSY SMPPT  
PEGFLASMDDRMDCTSEAGANLDSTDMALADNLDSTDDLVP SLQLNEFTNDILLDDVQSLINSTPSKPDNVLTWL  
PLRMRQLPKSFFNPP

rs:XP\_026739449 [XP\_026739449] transcriptional coactivator YAP1-like isoform X4 [Trichoplusia ni]. 44..58  
MALNSDAEQSNL VLRVDQSDSVLQSLFDTVLPKPSRPLQVPLRMRQLPKSFFNPPSTGSKSPSVSH  
SRENSADSAFGSSSATGASPVSHSRAHSSPASLQQT YAAGQQTQQPPLHHQHTKQRSYDVGTHIPDDLGLPLPHGW  
EQARTPEGQIYYLNHITKTTTWDDPRKTLAAQSVAGSVQH QSSDALLTQATSPQTI PNT PAPA QHLQRTPAAGGT



GPEGVWANASLQACQQKLRQLQSLQMERERLQKQRQOEIRIQQELIMSRQASSIVSSSLASSAGAGNTELPDPLPFLSG  
LSEHQREQESADSGLGMVPHSYMPPTPEGFLASMDRMDCTSEAGANLDSTDMALADNLDSTDDLVPQLNEF  
TNDILLDDVQSLINSTPSKPDNVLTLW PLRMRQLPKSFFNPP

rs:XP\_026739451 [XP\_026739451] WW domain-containing transcription  
regulator protein 1-like isoform X5 [Trichoplusia ni]. 44..58

MALNSDAEQKSNLVLVRVDQSDSVLQSLFDTVLKPDSCRPLQVPLRMRQLPKSFFNPPSTGSKSPSVSH  
SRENSADSAFGSSSATGASPVSHSRAHSSPASLQQTYAAGQQTQQPPLHHQHTKQRSYDVGTHIPDDLGLPLPHGW  
EQARTPEGQIYYLNHITKTTTWDDPRKTLAAQSVAGSVQHQSADALLTQATSPQTIPNTPAPAQHLQRTPAAGGT  
GPEGVWANASLQACQQKLRQLQSLQMERERLQKQRQOEIRIQQELIMSRQASSIVSSSLASSAGAGNTELPDPLPFLSG  
LSEHQREQESADSGLGMVPHSYMPPTPEGFLASMDRMDCTSEAGANLDSTDMALADNLDSTDDLNEFTNDIL  
LDDVQSLINSTPSKPDNVLTLW PLRMRQLPKSFFNPP

rs:XP\_026759278 [XP\_026759278] transcriptional coactivator YAP1-A isoform  
X1 [Galleria mellonella]. 44..58

MALNSDGEQKSNLVLVRVDQSDSVLQSLFDTVLKPDSCRPLQVPLRMRQLPKSFFNPPSTGSKSPSVSH  
SRENSADSAFGSSSATGAAPVSHSRAHSSPASLQQTYAAGQQTQQPPLHHQHTKQRSYDVATHIPDELGLPLPPGW  
EQARTPEGQVYYLNVHTKTTTWDDPRKTLAAQTVTSGVQHQAETLLSQTPTAQTATAPAAKSTSSNTATDPLG  
PLPEGWEQASTPEGETYFINHASRTTSWFDPRIPQHLQRTPAANAGAAGGGWANASIQASQQKLRQLQSLQLERER  
LKQRQOEIRLQQELMARQVTSSLSSSIGAVANTELSLDPFLSGLTDHQREQESADSGLGMGVAQSYMPHTPEDFL  
ASMDRMDCGSEAGANMDSTDIPLGDNLDTTDLVPSLQSELTDNMLLDDVQSLINPTSNKPGNALTWL  
PLRMRQLPKSFFNPP

rs:XP\_026759280 [XP\_026759280] transcriptional coactivator YAP1-A isoform  
X2 [Galleria mellonella]. 44..58

MALNSDGEQKSNLVLVRVDQSDSVLQSLFDTVLKPDSCRPLQVPLRMRQLPKSFFNPPSTGSKSPSVSH  
SRENSADSAFGSSSATGAAPVSHSRAHSSPASLQQTYAAGQQTQQPPLHHQHTKQRSYDVATHIPDELGLPLPPGW  
EQARTPEGQVYYLNVHTKTTTWDDPRKTLAAQTVTSGVQHQAETLLSQTPTAQTATAPAKSTSSNTATDPLGP  
LPEGWEQASTPEGETYFINHASRTTSWFDPRIPQHLQRTPAANAGAAGGGWANASIQASQQKLRQLQSLQLERERL  
KQRQOEIRLQQELMARQVTSSLSSSIGAVANTELSLDPFLSGLTDHQREQESADSGLGMGVAQSYMPHTPEDFLA  
SMDDRMDCGSEAGANMDSTDIPLGDNLDTTDLVPSLQSELTDNMLLDDVQSLINPTSNKPGNALTWL  
PLRMRQLPKSFFNPP

rs:XP\_026759281 [XP\_026759281] transcriptional coactivator yorkie isoform  
X3 [Galleria mellonella]. 44..58

MALNSDGEQKSNLVLVRVDQSDSVLQSLFDTVLKPDSCRPLQVPLRMRQLPKSFFNPPSTGSKSPSVSH  
SRENSADSAFGSSSATGAAPVSHSRAHSSPASLQQTYAAGQQTQQPPLHHQHTKQRSYDVATHIPDELGLPLPPGW  
EQARTPEGQVYYLNVHTKTTTWDDPRKTLAAQTVTSGVQHQAETLLSQTPTAQTATAPAQHLQRTPAANAGAA  
GGGWANASIQASQQKLRQLQSLQLERERLQKQRQOEIRLQQELMARQVTSSLSSSIGAVANTELSLDPFLSGLTDHQ  
REQESADSGLGMGVAQSYMPHTPEDFLASMDRMDCGSEAGANMDSTDIPLGDNLDTTDLVPSLQSELTDNMLL  
DDVQSLINPTSNKPGNALTWL PLRMRQLPKSFFNPP

rs:XP\_026769858 [XP\_026769858] transcriptional coactivator YAP1  
[Pangasianodon hypophthalmus]. 45..59

MDPSQHNPPAGHQVVHVRGDSETDLEALFNAMNPKSAVPPSVPMRMRKLPDSFFKPPPEPKSHSRQAS  
TDAGTAGTLTPQHVRHSSPASLQLSAVTSGMTSTLTPAGTSPQHLRQPSYEIPDDVPLPPGWEMAKTPSGQRYF  
LNHIDQSTTWQDPRKAMLQITQPNSASPVVQQQNLLNPASGPLPEGWEQAITAEGEIIYINHKNKTTSWLDPRL  
DPRYALNQQRITQSAPVKQGTQLPSSPQNPAVMGGNNQMRLLQQLQLEKERLRLKHQELLRPRPQELALRNQLPTS  
MEQDSGTQNPVSSPSMGQDGRSMTTNSSDPFLNSGTYHSRDESTDSGLSMSSYSVPRTPDFFLNSVDEMETSDSL  
GPASLATQPSRFPNYLDEIPGTDVDLGTLEGESMAVEGEELMPSLQEQALSSDILNDMESVLAATKIDKESFLTWL  
PMRMRKLPDSFFKPP

rs:XP\_026789822 [XP\_026789822] protein **FAM181A** [Pangasianodon  
hypophthalmus]. 131..145

MRNGLKHKLWLKMASSDSEVKTLNLFVNLAASDIKAALDKSAPCRRSVDHRKYLQKQLKRFSQKCPRT  
RCHTHRISESAALKTEDKRVVFTHEREKNLLIEKQATHTRGEENVHGNPNSENRSAAGHIPMRKRQLPASFWEE  
PRSSHISFEYAWKSHSSGTAGYGSSETDGEKRTTIEDELKANSWLRVRRGSSDLEPLKVDLTSSNVAVCAYCPLQ  
CHGRLLHSHLITPHSAFTEPGLRAKTPATELDMHKIRDGLKYRSTHVVKPIPTKPVSSSIFSVVGF  
PMRKRQLPASFWEEP

rs:XP\_026790522 [XP\_026790522] protein **FAM181B** [Pangasianodon hypophthalmus]. 155..169  
MAVQAAIMNSQFLNFCFPGSVMEYEVEKGLDGAFLGEVDCEGDFREATSDDLSSFIDSASSNIKLALDKP  
VKSKRKNVHRKYLQKQIKRCTGIMGLGNGAPQESCKNHSTPTPTSIIQNKTPKRDGAQANLQSKSLAALFNHAK  
DLRGEKAKKPPLRHRNLPPSFFTEPANARVTSTSGMSLKDLEGRNPDAAEFFELLGPDYSNMVSEQELYHTMPN  
RVQQQGTGPEPISFDSHNFVTGGFLYAEPWATSGGVSKKTDGIKAVPGQSSLYGNTDSSCPVPMEQNSTCSLTF  
PNFFTDCSVSQASYDLASGYSRGSFPSL PLRHRNLPPSFFTEP

rs:XP\_026922312 [XP\_026922312] protein **FAM181A** isoform X1 [Acinonyx jubatus]. 228..242  
MLCIWRGAPDWPEGPPSAGDSSSIQPTRGLHDCFQPDARSSPATPGLAQVCRGEPARPRRRGARGRPAP  
SVSSVPSPGAASHEQNPPASWKAPCSGLLVMANDSDVKMLLNFNVLASSDIKAALDKSAPCRRSVDHRKYLQKQL  
KRFSQKYSRSLPRGLPGRGAEPHLKRGPEDRPGRPLPLDSGHDSSPVGGGGCEEKALGNPYREECLSKEQTLQGQNP  
EAARPGQVPMRKRQLPASFWEEPRAHYSYPLGLEGGPGPREGPPYEGKKHCKGLEPLDPETAPVPASPAPAEKE  
PLKMSGVSLVGRVNAWSSCCPFQYHGQPVYPPGPPGALPQSPVPGLSLWRKSPASPGELAHFCKDVGDPGQKVYRVP  
VLKPIPTKPAVPPPIFNVFGYL PMRKRQLPASFWEEP

rs:XP\_026922314 [XP\_026922314] protein **FAM181A** isoform X2 [Acinonyx jubatus]. 207..221  
MLCIWRGAPDWPEGPPSAGDSSSIQPTRGLHDCFQPDARSSPATPGLAQVSSVPSPGAASHEQNPPASW  
KAPCSGLLVMANDSDVKMLLNFNVLASSDIKAALDKSAPCRRSVDHRKYLQKQLKRFSQKYSRSLPRGLPGRGAEP  
HLKRGPEDRPGRPLPLDSGHDSSPVGGGGCEEKALGNPYREECLSKEQTLQGQNPAAARPGQVPMRKRQLPASFE  
EPRATHSYPLGLEGGPGPREGPPYEGKKHCKGLEPLDPETAPVPASPAPAEKEPLKMSGVSLVGRVNAWSSCCPF  
QYHGQPVYPPGPPGALPQSPVPGLSLWRKSPASPGELAHFCKDVGDPGQKVYRPPVVLKPIPTKPAVPPPIFNVFGY  
L PMRKRQLPASFWEEP

rs:XP\_026922315 [XP\_026922315] protein **FAM181A** isoform X3 [Acinonyx jubatus]. 190..204  
MLLRGSPAHSLSRQAGPGLSARRGSLSCVSSVPSPGAASHEQNPPASWKAPCSGLLVMANDSDVK  
MLLNFNVLASSDIKAALDKSAPCRRSVDHRKYLQKQLKRFSQKYSRSLPRGLPGRGAEPHLKRGPEDRPGRPLPLDS  
GHDSSPVGGGGCEEKALGNPYREECLSKEQTLQGQNPAAARPGQVPMRKRQLPASFWEEPRAHYSYPLGLEGGPG  
PREGPPYEGKKHCKGLEPLDPETAPVPASPAPAEKEPLKMSGVSLVGRVNAWSSCCPFQYHGQPVYPPGPPGALPQ  
SPVPGLSLWRKSPASPGELAHFCKDVGDPGQKVYRPPVVLKPIPTKPAVPPPIFNVFGYL  
PMRKRQLPASFWEEP

rs:XP\_026922316 [XP\_026922316] protein **FAM181A** isoform X4 [Acinonyx jubatus].>rs:XP\_026922317 [XP\_026922317] protein **FAM181A** isoform X4 [Acinonyx jubatus].>rs:XP\_026922318 [XP\_026922318] protein **FAM181A** isoform X4 [Acinonyx jubatus]. 129..143  
MANDSDVKMLLNFNVLASSDIKAALDKSAPCRRSVDHRKYLQKQLKRFSQKYSRSLPRGLPGRGAEPHLK  
RGPEDRPGRPLPLDSGHDSSPVGGGGCEEKALGNPYREECLSKEQTLQGQNPAAARPGQVPMRKRQLPASFWEEP  
ATHSYPLGLEGGPGPREGPPYEGKKHCKGLEPLDPETAPVPASPAPAEKEPLKMSGVSLVGRVNAWSSCCPFQYH  
GQPVYPPGPPGALPQSPVPGLSLWRKSPASPGELAHFCKDVGDPGQKVYRPPVVLKPIPTKPAVPPPIFNVFGYL  
PMRKRQLPASFWEEP

rs:XP\_026895681 [XP\_026895681] protein **FAM181B** [Acinonyx jubatus]. 221..235  
MAVQAALLSTHPFVFPFGGGSPDGLGGAFGALDKGCCFEDDETGTTPAGELLAGNEGDMREATRDLLSF  
IDSASSNIKLALDKPGKSKRKNVHRKYLQKQIKRCSGLMGAAPPSPSGAADTPAKRPLAAPSAQAVAVPPHGK  
AVPREASQAAAAASLQSRSLAALFDSLHRVPGDTERAGGSLAAPAAGIGGAGAGGSGGEAAGTAGGTAVPGARK  
VPLRARNLPPSFFTEPSRAGGGGCGSPGVS LGDLEKGAEALEFFELLGPDYGAGTEASVLLAAEPLDVFPTGA  
AVLRGPPELEPGLFEPAMVGSLLYSESWAPGCPQTKKPLAARPGGLTLNEPLRPLYPSAADSPGAEDGPG  
LASFAPFFSDCALPAPPPPHQVSYDYSAGYSRTAYSSLWRPDGVWEGAPGEEGAHRD PLRARNLPPSFFTEP

rs:XP\_026976636 [XP\_026976636] protein **FAM181A** isoform X1 [Lagenorhynchus obliquidens]. 180..194  
MKLLQMLLRGSPCCQPEISPPGQLRALPWSRQPPAEPSSWKAPCSGPLVMASDSDVKMLLNFNVLAS  
SDIKAALDKSAPCRRSVDHRKYLQKQLKRFSQKYSRSLPRGLPGRGAEPHLKRGSEDRPGRPLPLDSGHSSSPGGGR  
CCKEALGNPYREECLSKEQTLHGPDPEAARPGQVPMRKRQLPASFWEEPRTQSYVPGLEGGGLGPREGPPYEGK

KHCKGLEPRGPETAPVPASPRAPAEKEPLKMPGVSLVGRVNAWNCCPFQYHGQPIYPGPPGALPQSPLPSLGLWR  
KSSASPGE LAHFCKDVEGPGQKVYRPVVLKPIPTKPAMPPPIFNVFGYL PMRKRQLPASFWEEP

rs:XP\_026976637 [XP\_026976637] protein **FAM181A** isoform X2 [Lagenorhynchus obliquidens]. 129..143

MASDSVDMKLLNFVNLAASSDIKAALDKSAPCRRSVDHRKYLQKQLKRFSQKYSRLPRGLPGRGAEPHLK  
RGSEDRPGRLPLDSGHSSSPGGRCCKEKALGNPYREECLSKEQTLHGPDPEAARPGQVPMRKRQLPASFWEEP  
PTQSYPVGLEGLGPREGPPYEGKKHCKGLEPRGPETAPVPASPRAPAEKEPLKMPGVSLVGRVNAWNCCPFQYH  
GQPIYPGPPGALPQSPLPSLGLWRKSSASPGE LAHFCKDVEGPGQKVYRPVVLKPIPTKPAMPPPIFNVFGYL  
PMRKRQLPASFWEEP

rs:XP\_026994878 [XP\_026994878] transcriptional coactivator YAP1 isoform X1 [Tachysurus fulvidraco]. 45..59

MDPSQHNPAGHQVVHVRGDSETDLEALFNAVMPKSAVPPSVPMRLRKLKLPDSFFKPPPEPKSHSRQAS  
TDAGTAGTLTPQHVRHSSPASLQLGAVTSGTMSTLTPAGTSPQHRLRQPSYEIPDDVPLPPGWEMAKTPSGQRYF  
LNHIDQSTTWQDPRKAMLQMNQTNASPVVQVQONLLNPASGLPEGWEQAITAEGEIIYINHNKNTTSWLDPRL  
DPRFALNQQRITQSAPVKQGTQLPSSPQNPPVMGGNSQLRLQOLEKERLRLKHQELLRPRPQELALRNQLPTSME  
QDSGTQNPVSSPGMGQDGRSMTTNSSDPFLNSGTYHSRDESTDSGLSMSSYSVPRTPDDFLNSVDEMETSDSLG  
ASLATQPSRFPNYLDEIPGTDVDLGTLEGESMAVEGEELMPSLQEQALSSDILNDMESVLAATKIDKESFLTWL  
PMRLRKLKLPDSFFKPP

rs:XP\_026994964 [XP\_026994964] transcriptional coactivator YAP1 isoform X2 [Tachysurus fulvidraco]. 45..59

MDPSQHNPAGHQVVHVRGDSETDLEALFNAVMPKSAVPPSVPMRLRKLKLPDSFFKPPPEPKSHSRQAS  
TDAGTAGTLTPQHVRHSSPASLQLGAVTSGTMSTLTPAGTSPQHRLRQPSYEIPDDVPLPPGWEMAKTPSGQRYF  
LNHIDQSTTWQDPRKAMLQMNQTNASPVVQVQONLLNPASALNQQRITQSAPVKQGTQLPSSPQNPPVMGGNSQ  
LRLQOLEKERLRLKHQELLRPRPQELALRNQLPTSMEQDSGTQNPVSSPGMGQDGRSMTTNSSDPFLNSGTYHSR  
DESTDSGLSMSSYSVPRTPDDFLNSVDEMETSDSLGPASLATQPSRFPNYLDEIPGTDVDLGTLEGESMAVEGEE  
LMPSLQEQALSSDILNDMESVLAATKIDKESFLTWL PMRLRKLKLPDSFFKPP

rs:XP\_027001732 [XP\_027001732] protein **FAM181B** [Tachysurus fulvidraco]. 155..169

MAVQAAIMNSQFLNFCFPGSVMEYEVEKGLDGTFLGEVDCEGEFREATSDDLFSFIDSASSNIKLALDKP  
VSKSRKVNHRKYLQKQIKRCTGIMGLGNGSPHDACKSHDSTPSPTSIIQNKTPKRDGAQANLQSKSLAALFNHAK  
DLRGEKTKKPLRHRNLPPSFFTEPANARVTSTSGMSLKDLEGRNPDATFEFFELLGPDYSNMVSEQELYHTMPN  
RVQQGTTGPEPIPFDSHSFVTGGFLYAEPWTTASAGVSKKTDGIKIVPGQSSLYGNTDSSCPLPMEQNSTCSLTF  
PNFFTDSCSVSVDLASGYSRGSFPPL PLRHRNLPPSFFTEP

rs:XP\_027028511 [XP\_027028511] protein **FAM181A** [Tachysurus fulvidraco]. 119..133

MASSDSEVKTLNLFVNLAASSDIKAALDKSAPCRRSVDHRKYLQKQLKRFSQKCPRTPRCHTYRISESNA  
AKLPEDKRVMTHERAKNLLNEKQNTHTCGEENVGGNPYSENRSAPGHI PMRKRQLPASFWEEPSSSHISFEYAW  
KTHNTNGTVGYGSAETDQKRTRIEDELKANSWLRVRRGSLDLEPLKVDLTSTNVAVCAYCPLQCHGHRLLHGHLI  
TPHSAFTEPGLRAKTPTNELDTQMKMDGLKYRSPHVVKPIPTKPVSSIFSVMFGFI PMRKRQLPASFWEEP

rs:XP\_027046879 [XP\_027046879] uncharacterized protein LOC113674593 [Pocillopora damicornis].>tr:A0A3M6TQW7\_9CNID [A0A3M6TQW7] SubName: Full=Uncharacterized protein {ECO:0000313|EMBL:RMX43729.1}; 110..124

MDPQRKRLQHKDTLNRWTPPSISPPSPCGPSSPQSPPLVVRGKSLSLNRVAGAPALLPIRETPAKELSK  
RGRKQRLLLSQAGNALKRRETSDFNKLEARLKPKRGLPMMRALPQSFQEPKNIQNSSLSTEGTLSSLPPL  
FHNANNTSYDVKVRPVTPEEKYLPRPPKEPKLVITSPQEQLLKLFETVEEDKTKKFVIRGRPRRVQSDLTPC  
QLPKLEEDPCMMTSLAEKLFQLSLENNKQTPGANTSLSCVSVHDGDKSVTLPSLNVEQNYSQLMSEIVAHF  
PMRMRALPQSFQEP

rs:XP\_027047666 [XP\_027047666] transcriptional coactivator YAP1-A-like [Pocillopora damicornis].>tr:A0A3M6TNK5\_9CNID [A0A3M6TNK5] SubName: Full=Uncharacterized protein {ECO:0000313|EMBL:RMX42939.1}; 46..60

MERKNNNCVVHVRQDSDNDLEALFHVISKNSVAKTHPEPASSQSLPMRLRKLKLPSSFFKQPPIDGSLSPD  
QDVPKRLPISSHRSRSPASLTVPTTLKGPNNHSLSPGVHHRQSTSFNDNTALLEEPTMPMPGWEMRTTASGQRYF

MNHFEQLTTWQDPRKTQSTSNLNSVQPVGNLPGWEQAITPEGDIYYINHIERTTSWIDPRLAMHCRNQENIRGS  
TLPPDFNRQGHRTLQLHRLQREEREQLLKRQOELLKQEIKLKRDILEEGGKPSLLGNLTREFSAQDPPVTNGGHIR  
DESFDSSGLGMGGGNYQFHDVDMNDSQPMFDANYNSKDTSFRA DPRIPEILD SLPGTNVDLGVMEGTDNSTNMETE  
DLGVGLEFNSEILNDMESVLISPTLTWL PMRLRKLPPSFFKQP

rs:XP\_027059914 [XP\_027059914] uncharacterized protein LOC113686491  
[Pocillopora damicornis].>tr:A0A3M6UQ34\_9CNID [A0A3M6UQ34] SubName:  
Full=Uncharacterized protein {ECO:0000313|EMBL:RMX55803.1}; 148..162  
MNSLVEESVATPTSLNLFVSNATSTLKFALDKPIKPKRKVNHRKYLQRQLNGRSSSATTSSFDGWSVSO  
GEMLFDHVLKSGQRGSPSAVVRAEKSTAISRENHSEKIQSLGERKRAQKKEEKSWRISRQQINDCKSSEAPSSQ  
PSQPLRKRKLPESFWTEPSPKASRKPLQATRQSNNTLNATNELQRSELEILDWLRPELDDFIERWSEESEECASNNS  
SRPDSLSDSPSTLDPHSPYSDESENVGSMDEFFEQRVFPFSDFSSTKNGEYTTNIPSI RNLSNTNLFADNRTYSV  
PQNYVQRQMSHSVSCYGGHYGFSANKWVANPVQPNYFETGYNLS PLRKRKLPESFWTEP

rs:XP\_027196464 [XP\_027196464] transcriptional coactivator YAP1-like  
[Dermatophagoides pteronyssinus]. 67..81  
MHLKPDETSSTTTNHTNNNNNNNNNNVNNNNGNVAIVRVDTAADEGLDELFKAVMSPNNGQSRLPQQVPMR  
QRRLPPSFFRPPSAASSNNSLTSMGNHSRESSLDDGGYQSQGPSLNGENKIHNTPILIGYNQLANGLAIHPRANS  
SPAALPLNIGSSTTATNSSSNASLNHTQGTFFGGSNDLAKSSNNSAATTTTHYRQMSYDLDDQMRLPDGWEMSYTAT  
GERYFLNHKEKTTTWEDPRKKIVEEMLRRSTPPPPVPPSVASQPSQSSSVAAATQQPIIQSITTAIPLQATTNPT  
TTPITPSVVEQEHLHSYIDPLIVPLPDGWEQAQTSSGDIYFISHIDQTTTWFHPSIPRNLQMKRIQQQQNCSIQ  
PPFQNLITTTTNIPTLVLVAKNMNTSCQATPTPVSTLIPPTVNAITNQTSTQNHRLDLELERERMKQRQEE  
LLQSSLLNSVTASNIMLSSSSSSNDNAISTQSPFLSLQNECHSRQESIDSGLDIGNSSNFSMTSSSSSTAHTPDN  
FLRMSTTTTGNNITAASASAISTSIAAQTNNTATTISDDLFPENMQISSLDL DSESMDFMQGLDMDLLSNVEEL  
LNSNKDNIMTWL PMRQRRLPPSFFRPP

rs:XP\_027202426 [XP\_027202426] WW domain-containing transcription  
regulator protein 1-like [Dermatophagoides pteronyssinus]. 49..63  
MAQNNMSHESKMYVAPNPETHFEELFRVVQQQDVNNNNNNNAIQPLNNVPMRQRNFPESSFRPPSCSSSA  
SHRESSLDATFNSNFVNKNHSSAKPPTTPHRNNNNNNHNISSPPFVHQKAHSLPASLPNQKLTFTPIITNLDDN  
KSLVKTQPAAPPPSPKQYRHQQQLKLANANLNTNNNNNFHRQQSYDIDKIPLPDGWTMSFDSNGERYFIDHKRKL  
TTWDDPRIKITQQNFTNLAQNPTNSIINHNPVASYHQHQSSQPVPQSPALISHNSDSSFYGLSLDNHFTTLPDS  
GLQFDSNMIAIPTIEIASVTEKMKDQILTDDTNQQQQQQLFDPQLQYLTELRMEREMRNRAEILKTNPMVRSDYL  
PSLQTLPKSSNNKDSTTTTSMMMHGRQESQDSGLGGSTTSGTLNSINFNEANLLTDFGSGNHVAVEQLDPNVVQ  
CLMSDSVDCFAIADLDDLDFDQYIQHNPIINNDIGQLFNHDETMTWNV PMRQRNFPESSFRPP

rs:XP\_027211634 [XP\_027211634] transcriptional coactivator YAP1-like  
[Panaeus vannamei]. 49..63  
MASSNKDDSLMEQRGNQIVHVRADSDSELEALFEVVLKPSSQVPLQKPFKMRNLPASFFTPPAHRQSP  
APTVTHSREGSADSTFGGGGVLGRLVSGAMSPNTAPQHFRHSSPASLQQTFAVPQQQVAHLNLNDDMGSLPPG  
WEQARTAEGQIYYLNIYCRRTMNSFVVVGHVRPTYSYRLSPQGLAIIVEVN PFKMRNLPASFFTPP

rs:XP\_021129359 [XP\_021129359] protein **FAM181A** [Anas platyrhynchos].  
127..141  
MASDSEVKLLNFVNLASSDIKAALDKSAPCRRSVDHRKYLQKQLKRFSQKYSRVPRCHPGKPTTECGPR  
RGAEDRARGCQPEVPDPGPHSGAAAEKVLQAAEAVESLAGERALPEQNPEAGRDPQVPMRKRQLPASFWEEP  
QSLPSRGGFPPEGLSAPRDTPPFEGKSKRSLDTAGPESPEPALQAGEKDPAGVLSGRVGTWTCPPFCPGPA  
VYQPPGTLPPSPFPGLGLWRKSAATLPAEAQPFCKEAGAGQKLYRPVVLKPIPTKPAVPPPIFNVFGYL  
PMRKRQLPASFWEEP

rs:NP\_001194003 [NP\_001194003] protein **FAM181A** isoform 2 [Homo  
sapiens].>rs:NP\_001194002 [NP\_001194002] protein **FAM181A** isoform 2 [Homo  
sapiens].>rs:NP\_001194000 [NP\_001194000] protein **FAM181A** isoform 2 [Homo  
sapiens]. 129..143  
MASDSVDMKLLNFVNLASSDIKAALDKSAPCRRSVDHRKYLQKQLKRFSQKYSRLPRGLPGRAAEPYLK  
RGSEDRPRLLLLDLGPDSSPGGGGCKEKLVRNPYREECLAKEQLPQRQHPEAAQPGQVPMRKRQLPASFWEEP  
PTHSYHVGLEGGLPREGPPYEGKKNCKGLEPLGPETTLVSMSPRALAEKEPLKMPGVSLVGRVNAWSCC  
PFQYH  
GQPIYPGPLGALPQSPVPSLGLWRKSPAFFGELAHLCCKDVGDLGQKVC RPVVLKPIPTKPAVPPPIFNVFGYL  
PMRKRQLPASFWEEP

rs:XP\_027419730 [XP\_027419730] transcriptional coactivator YAP1 isoform X1 [Bos indicus x Bos taurus]. 84..98

MDPGPPPPQAPQGGQPPPAQAPQGGQPPSAPGQPAPPPGPPAAPQAPPAGHQIVHVRGDSETDLEALFN  
AVMNPKTANVPQTVPMRLRKLKLPDSFFKPPPEPKSHSRQASTDAGTAGALTPQHVRHSSPASLQLGAVSPGTLTPT  
GVVSGPAAAPAAQHLRQSSFEIPDDVPLPAGWEMAKTSSGQRYFLNHIDQTTTWQDPRKAMLSQMNVTAPTSPPV  
QQNMMNSASGPLPDGWEQAMTQDGEIYYINHKNKTTSWLDPRLDPRFGKAMNQRISQSAPVKQPPPLAPQSPQGG  
VLGGGSSNQQQMRLQQLQMEKERLRLKQOELLRQVRPQAMRNINPSTANSPKCQELALRSQLPTLEQDGGTQNP  
VSSPGMSQELRTMTTNSDDPFLNSGTYHSRDESTDSGLSMSSYSVPRTPDFFLNSVDEMDTGDTINQSTLPSQQN  
RFPDYLEAIPGTNVDLGTLEGDGMNIEGEEELMPSLQEQALSSDILNDMESVLAATKLDKESFLTWL  
PMRLRKLKLPDSFFKPP

rs:XP\_027419732 [XP\_027419732] transcriptional coactivator YAP1 isoform X3 [Bos indicus x Bos taurus]. 84..98

MDPGPPPPQAPQGGQPPPAQAPQGGQPPSAPGQPAPPPGPPAAPQAPPAGHQIVHVRGDSETDLEALFN  
AVMNPKTANVPQTVPMRLRKLKLPDSFFKPPPEPKSHSRQASTDAGTAGALTPQHVRHSSPASLQLGAVSPGTLTPT  
GVVSGPAAAPAAQHLRQSSFEIPDDVPLPAGWEMAKTSSGQRYFLNHIDQTTTWQDPRKAMLSQMNVTAPTSPPV  
QQNMMNSASGPLPDGWEQAMTQDGEIYYINHKNKTTSWLDPRLDPRFGKAMNQRISQSAPVKQPPPLAPQSPQGG  
VLGGGSSNQQQMRLQQLQMEKERLRLKQOELLRQVRPQAMRNINPSTANSPKCQELALRSQLPTLEQDGGTQNPVSSP  
GMSQELRTMTTNSDDPFLNSGTYHSRDESTDSGLSMSSYSVPRTPDFFLNSVDEMDTGDTINQSTLPSQQNRFPD  
YLEAIPGTNVDLGTLEGDGMNIEGEEELMPSLQEQALSSDILNDMESVLAATKLDKESFLTWL  
PMRLRKLKLPDSFFKPP

rs:XP\_027419734 [XP\_027419734] transcriptional coactivator YAP1 isoform X5 [Bos indicus x Bos taurus]. 84..98

MDPGPPPPQAPQGGQPPPAQAPQGGQPPSAPGQPAPPPGPPAAPQAPPAGHQIVHVRGDSETDLEALFN  
AVMNPKTANVPQTVPMRLRKLKLPDSFFKPPPEPKSHSRQASTDAGTAGALTPQHVRHSSPASLQLGAVSPGTLTPT  
GVVSGPAAAPAAQHLRQSSFEIPDDVPLPAGWEMAKTSSGQRYFLNHIDQTTTWQDPRKAMLSQMNVTAPTSPPV  
QQNMMNSASGPLPDGWEQAMTQDGEIYYINHKNKTTSWLDPRLDPRFGKAMNQRISQSAPVKQPPPLAPQSPQGG  
VLGGGSSNQQQMRLQQLQMEKERLRLKQOELLRQVRPQELALRSQLPTLEQDGGTQNPVSSPGMSQELRTMTTN  
SSDPFLNSGTYHSRDESTDSGLSMSSYSVPRTPDFFLNSVDEMDTGDTINQSTLPSQQNRFPDYLEAIPGTNVDL  
GTLEGDGMNIEGEEELMPSLQEQALSSDILNDMESVLAATKLDKESFLTWL PMRLRKLKLPDSFFKPP

rs:XP\_027419737 [XP\_027419737] transcriptional coactivator YAP1 isoform X7 [Bos indicus x Bos taurus]. 84..98

MDPGPPPPQAPQGGQPPPAQAPQGGQPPSAPGQPAPPPGPPAAPQAPPAGHQIVHVRGDSETDLEALFN  
AVMNPKTANVPQTVPMRLRKLKLPDSFFKPPPEPKSHSRQASTDAGTAGALTPQHVRHSSPASLQLGAVSPGTLTPT  
GVVSGPAAAPAAQHLRQSSFEIPDDVPLPAGWEMAKTSSGQRYFLNHIDQTTTWQDPRKAMLSQMNVTAPTSPPV  
QQNMMNSASGPLPDGWEQAMTQDGEIYYINHKNKTTSWLDPRLDPRFGKAMNQRISQSAPVKQPPPLAPQSPQGG  
VLGGGSSNQQQMRLQQLQMEKERLRLKQOELLRQELALRSQLPTLEQDGGTQNPVSSPGMSQELRTMTTNSDDP  
FLNSGTYHSRDESTDSGLSMSSYSVPRTPDFFLNSVDEMDTGDTINQSTLPSQQNRFPDYLEAIPGTNVDLGTLE  
GDGMNIEGEEELMPSLQEQALSSDILNDMESVLAATKLDKESFLTWL PMRLRKLKLPDSFFKPP

rs:XP\_027388184 [XP\_027388184] protein **FAM181B** [Bos indicus x Bos taurus]. 214..228

MAVQAALLSTHPFVFPFGGGSPDGLGGAFGALDKGCCFEDEETGTPAGALLAGAESGDAREATRDLISF  
IDSASSNIKLALDKPGKSKRKNHRKYLQKQIKRCSGLMGAAPPSPGAAADTPAKRPLAGAQTVPVPAHVK  
AAPRREASQAAAAASLQSRSLAALFDSLHRVPGGADPAGVAEAAAPAGLVRGDAAGSAGGPAVPGARKVPLRARN  
LPPSFFTEPSRAGGCVCGPSGVSLGDLEKGEAAEFFELLGPDYAGATEAGALLAAEPLDVFPAAGAVLRGPP  
ELEPGLFDPQAMVGSLLYPEPWSAPGGPATKKPPLPAPGGGLTLNEPLRSVYPAADSPGGDDGPGLLASFTPF  
FSDCALPPAPPQVSYDYSAGYSRTAFAGLWRPDGAWEGAPGEEGAPRD PLRARNLPPSFFTEP

rs:XP\_027533148 [XP\_027533148] transcriptional coactivator YAP1 isoform X1 [Neopelma chrysocephalum]. 86..100

MDPGQPQAQQPPQAQPPAPQQQQPPPPQPPGAVSGASAGAVQPPGAGPPPAGHQIVHVRGDSETDLEAL  
FNAVMNPKGANVPHTLPMRLRKLKLPDSFFKPPPEPKAHSRQASTDAGTAGALTPQHVRHSSPASLQLGAVSPGTLT  
PSGVVTGPGAPSSQHLRQSSFEIPDDVPLPPGWEMAKTPSGQRYFLNHIDQTTTWQDPRKAMLSQMNVTAPTSPS  
VQQNIMNSASGPLPDGWEQAMTQDGEIYYINHKNKTTSWLDPRLDPRFAMNQRISQSAPVKQPPPLAPQSPQGGV  
MGGSSSNQQQMRLQQLQMEKERLRLKHQELLRQVRPQALRNINPSTANSPKHQELALRSQLPTMEQDGGSQNPV  
SSPGMSQELRTMTTNSDDPFLNSGTYHSRDESTDSGLSMSSYSVPRTPDFFLNSVDEMDTGDSIGQSNIPSHQNR

FPDYLEAIPGTNVDLGTLEGDMNIEGEEELMPSLQEQALSSDILNDMESVLAATKLDKESFLTWL  
PMRLRKLPSFFKPP

rs:XP\_027533149 [XP\_027533149] transcriptional coactivator YAP1 isoform  
X2 [Neopelma chrysocephalum]. 86..100

MDPGQPQAQQPPQAAQPPAPQQQQPPPQPPGAVSGASAGAVQPPGAGPPPAGHQIVHVRGDSETDLEAL  
FNAVMNPKGANVPHTLPMRLRKLPSFFKPPPEPKAHSRQASTDAGTAGALTPQHVRHSSPASLQLGAVSPGTLT  
PSGVVTGPGAPSSQHLRQSSFEIPDDVPLPPGWEMAKTPSGQRYFLNHIDQTTTWQDPRKAMLSQMNVTAPTS  
VQQNIMNSASGPLPDGWEQAMTQDGEIYYINHKNKTTSWLDPRLDPRFAMNQRISQSAPVKQPPPLAPQSPQGGV  
MGGSSSNQQQQMRLQQLQMEKERLRLKHQELLRQALRNINPSTANSPKHQELALRSQLPTMEQDGGSQNPVSSPG  
MSQELRTMTTNSDFFLNSGTYHSRDESTDSGLSMSSYSVPRTPDFFLNSVDEMMDTGD SIGQSNIPSHQNRFPDY  
LEAIPGTNVDLGTLEGDMNIEGEEELMPSLQEQALSSDILNDMESVLAATKLDKESFLTWL  
PMRLRKLPSFFKPP

rs:XP\_027533150 [XP\_027533150] transcriptional coactivator YAP1 isoform  
X3 [Neopelma chrysocephalum]. 86..100

MDPGQPQAQQPPQAAQPPAPQQQQPPPQPPGAVSGASAGAVQPPGAGPPPAGHQIVHVRGDSETDLEAL  
FNAVMNPKGANVPHTLPMRLRKLPSFFKPPPEPKAHSRQASTDAGTAGALTPQHVRHSSPASLQLGAVSPGTLT  
PSGVVTGPGAPSSQHLRQSSFEIPDDVPLPPGWEMAKTPSGQRYFLNHIDQTTTWQDPRKAMLSQMNVTAPTS  
VQQNIMNSASGPLPDGWEQAMTQDGEIYYINHKNKTTSWLDPRLDPRFAMNQRISQSAPVKQPPPLAPQSPQGGV  
MGGSSSNQQQQMRLQQLQMEKERLRLKHQELLRQVRPQELALRSQLPTMEQDGGSQNPVSSPGMSQELRTMTTNS  
SDPFLNSGTYHSRDESTDSGLSMSSYSVPRTPDFFLNSVDEMMDTGD SIGQSNIPSHQNRFPDYLEAIPGTNVDL  
GTLEGDMNIEGEEELMPSLQEQALSSDILNDMESVLAATKLDKESFLTWL PMRLRKLPSFFKPP

rs:XP\_027533151 [XP\_027533151] transcriptional coactivator YAP1 isoform  
X4 [Neopelma chrysocephalum]. 86..100

MDPGQPQAQQPPQAAQPPAPQQQQPPPQPPGAVSGASAGAVQPPGAGPPPAGHQIVHVRGDSETDLEAL  
FNAVMNPKGANVPHTLPMRLRKLPSFFKPPPEPKAHSRQASTDAGTAGALTPQHVRHSSPASLQLGAVSPGTLT  
PSGVVTGPGAPSSQHLRQSSFEIPDDVPLPPGWEMAKTPSGQRYFLNHIDQTTTWQDPRKAMLSQMNVTAPTS  
VQQNIMNSASGPLPDGWEQAMTQDGEIYYINHKNKTTSWLDPRLDPRFAMNQRISQSAPVKQPPPLAPQSPQGGV  
MGGSSSNQQQQMRLQQLQMEKERLRLKHQELLRQELALRSQLPTMEQDGGSQNPVSSPGMSQELRTMTTNSDFF  
LNSGTYHSRDESTDSGLSMSSYSVPRTPDFFLNSVDEMMDTGD SIGQSNIPSHQNRFPDYLEAIPGTNVDLGT  
LEGDMNIEGEEELMPSLQEQALSSDILNDMESVLAATKLDKESFLTWL PMRLRKLPSFFKPP

rs:XP\_027533152 [XP\_027533152] transcriptional coactivator YAP1 isoform  
X5 [Neopelma chrysocephalum]. 86..100

MDPGQPQAQQPPQAAQPPAPQQQQPPPQPPGAVSGASAGAVQPPGAGPPPAGHQIVHVRGDSETDLEAL  
FNAVMNPKGANVPHTLPMRLRKLPSFFKPPPEPKAHSRQASTDAGTAGALTPQHVRHSSPASLQLGAVSPGTLT  
PSGVVTGPGAPSSQHLRQSSFEIPDDVPLPPGWEMAKTPSGQRYFLNHIDQTTTWQDPRKAMLSQMNVTAPTS  
VQQNIMNSASAMNQRISQSAPVKQPPPLAPQSPQGGVMGGSSSNQQQQMRLQQLQMEKERLRLKHQELLRQVRPQ  
ALRNINPSTANSPKHQELALRSQLPTMEQDGGSQNPVSSPGMSQELRTMTTNSDFFLNSGTYHSRDESTDSGLS  
MSSYSVPRTPDFFLNSVDEMMDTGD SIGQSNIPSHQNRFPDYLEAIPGTNVDLGTLEGDMNIEGEEELMPSLQEQAL  
SSDILNDMESVLAATKLDKESFLTWL PMRLRKLPSFFKPP

rs:XP\_027533153 [XP\_027533153] transcriptional coactivator YAP1 isoform  
X6 [Neopelma chrysocephalum]. 86..100

MDPGQPQAQQPPQAAQPPAPQQQQPPPQPPGAVSGASAGAVQPPGAGPPPAGHQIVHVRGDSETDLEAL  
FNAVMNPKGANVPHTLPMRLRKLPSFFKPPPEPKAHSRQASTDAGTAGALTPQHVRHSSPASLQLGAVSPGTLT  
PSGVVTGPGAPSSQHLRQSSFEIPDDVPLPPGWEMAKTPSGQRYFLNHIDQTTTWQDPRKAMLSQMNVTAPTS  
VQQNIMNSASAMNQRISQSAPVKQPPPLAPQSPQGGVMGGSSSNQQQQMRLQQLQMEKERLRLKHQELLRQALRN  
INPSTANSPKHQELALRSQLPTMEQDGGSQNPVSSPGMSQELRTMTTNSDFFLNSGTYHSRDESTDSGLSMSS  
YSVPRTPDFFLNSVDEMMDTGD SIGQSNIPSHQNRFPDYLEAIPGTNVDLGTLEGDMNIEGEEELMPSLQEQALSSD  
ILNDMESVLAATKLDKESFLTWL PMRLRKLPSFFKPP

rs:XP\_027533154 [XP\_027533154] transcriptional coactivator YAP1 isoform  
X7 [Neopelma chrysocephalum]. 86..100

MDPGQPQAQQPPQAAQPPAPQQQQPPPQPPGAVSGASAGAVQPPGAGPPPAGHQIVHVRGDSETDLEAL  
FNAVMNPKGANVPHTLPMRLRKLPSFFKPPPEPKAHSRQASTDAGTAGALTPQHVRHSSPASLQLGAVSPGTLT  
PSGVVTGPGAPSSQHLRQSSFEIPDDVPLPPGWEMAKTPSGQRYFLNHIDQTTTWQDPRKAMLSQMNVTAPTS

VQQNIMNSASAMNQRISQSAPVKQPPPLAPQSPQGGVMGGSSSNQQQQMRLQQLQMEKERLRLKHQELLRQVRPQ  
ELALRSQLPTMEQDGGSQNPVSSPGMSQELRTMTTNSDDPFLNSGTYHSRDESTDSGLSMSSYSVPRTPDDFLNS  
VDEMDTGDSIGQSNIPSHQNRFPDYLEAIPGTNVDLGTLEGDGMNIEGEEELMPSLQEQALSSDILNDMESVLAATK  
LDKESFLTWL PMRLRKLKLPDSFFKPP

rs:XP\_027533155 [XP\_027533155] transcriptional coactivator YAP1 isoform  
X8 [Neopelma chrysocephalum]. 86..100

MDPGQPQAQQPPQAAQPPAPQQQQPPQPPGAVSGASAGAVQPPGAGPPPAGHQIVHVRGDSETDLEAL  
FNAVMNPKGANVPHTLPMRLRKLKLPDSFFKPPPEPKAHSRQASTDAGTAGALTPQHVRHSSPASLQLGAVSPGTLT  
PSGVVTGPGAPSSQHLRQSSFEIPDDVPLPPGWEMAKTPSGQRYFLNHIDQTTTQWQDPRKAMLSQMNVTAPTS  
VQQNIMNSASAMNQRISQSAPVKQPPPLAPQSPQGGVMGGSSSNQQQQMRLQQLQMEKERLRLKHQELLRQELAL  
RSQLPTMEQDGGSQNPVSSPGMSQELRTMTTNSDDPFLNSGTYHSRDESTDSGLSMSSYSVPRTPDDFLNSVDEM  
DTGDSIGQSNIPSHQNRFPDYLEAIPGTNVDLGTLEGDGMNIEGEEELMPSLQEQALSSDILNDMESVLAATKLDKE  
SFLTWL PMRLRKLKLPDSFFKPP

rs:XP\_027533281 [XP\_027533281] protein **FAM181B** [Neopelma chrysocephalum].  
168..182

MAAPAALLSPHLLSFCFPAAGGLLYADLEKGYEGGGDAGDFREATRDLLSFIDSASSNIKLALDRP  
VKSRRKVNHRKYLQKQIKRCTGIIAAAAPPAACPPAACSTRPPRRPEPAQAAGSSLQSKSLAALFGSLQRGQGA  
AGGAEAKAGAGGGEKAAGGPRKVLDRNLPPSFFTEPALPAPAARGPPAKEPEKGGGAAEASEFFELLCPYEG  
ALLPEHAAPPDAFGRLPAELGLEHGLYELPLPAGPHALLGGLLYPEPPWSPAAPCSPPRKAPPEPLRPLYAGGP  
EPVPGGGGSTEPEGHLPAGFAFFFECPAPPQPPYDYGAGYHRAGYPGL PLRDRNLPPSFFTEP

rs:XP\_027539541 [XP\_027539541] sentrin-specific protease 3 isoform X1  
[Neopelma chrysocephalum]. 171..185

MAGRQRQGVIQPLAELRLPSFFPHGLLLPAHPEPDFHNLSEEEEEEEEEEEEEEEEEVEAAEESVRPEPAI  
SSTAETTLRLLKFSSELISCDIQRYFGRRGREEAAGTQVPVKDCESPRSAGAQPEAPRGSPGAAHRLGPLAELFEY  
GVHRCLSPRAAGGRTQRLERKYGHITPMHCRKLPPSFWKEPGPASLLHTGTPDFSDLLANWTVEPGPELPCAGRE  
LPLEPGRPGLEAEPFTGL PMHCRKLPPSFWKEP

rs:XP\_027539542 [XP\_027539542] sentrin-specific protease 3 isoform X2  
[Neopelma chrysocephalum]. 167..181

MAAGVIQPLAELRLPSFFPHGLLLPAHPEPDFHNLSEEEEEEEEEEEEEEEEEVEAAEESVRPEPAISSTA  
ETTLRLLKFSSELISCDIQRYFGRRGREEAAGTQVPVKDCESPRSAGAQPEAPRGSPGAAHRLGPLAELFEYGVHR  
CLSPRAAGGRTQRLERKYGHITPMHCRKLPPSFWKEPGPASLLHTGTPDFSDLLANWTVEPGPELPCAGRELPLE  
PGRPGLEAEPFTGL PMHCRKLPPSFWKEP

rs:XP\_027493821 [XP\_027493821] transcriptional coactivator YAP1 isoform  
X1 [Corapipo altera].>rs:XP\_027594860 [XP\_027594860] transcriptional  
coactivator YAP1 isoform X1 [Pipra filicauda]. 86..100

MDPGQPQAQQPPQAAQPPAPQQQQPPQPPGAVSGASAGAAQPPGAGPPPAGHQIVHVRGDSETDLEAL  
FNAVMNPKGANVPHTLPMRLRKLKLPDSFFKPPPEPKAHSRQASTDAGTAGALTPQHVRHSSPASLQLGAVSPGTLT  
PSGVVTGPGAPSSQHLRQSSFEIPDDVPLPPGWEMAKTPSGQRYFLNHIDQTTTQWQDPRKAMLSQMNVTAPTS  
VQQNIMNSASGPLPDGWEQAMTQDGEIYYINHKNKTTSWLDPRLDPRFAMNQRISQSAPVKQPPPLAPQSPQGGV  
MGGSSSNQQQQMRLQQLQMEKERLRLKHQELLRQVRPQALRNINPSTANSPKHQELALRSQLPTMEQDGGSQNPV  
SSPGMSQELRTMTTNSDDPFLNSGTYHSRDESTDSGLSMSSYSVPRTPDDFLNSVDEMDTGDSIGQSNIPSHQNR  
FPDYLEAIPGTNVDLGTLEGDGMNIEGEEELMPSLQEQALSSDILNDMESVLAATKLDKESFLTWL  
PMRLRKLKLPDSFFKPP

rs:XP\_027493893 [XP\_027493893] transcriptional coactivator YAP1 isoform  
X2 [Corapipo altera].>rs:XP\_027594861 [XP\_027594861] transcriptional  
coactivator YAP1 isoform X2 [Pipra filicauda]. 86..100

MDPGQPQAQQPPQAAQPPAPQQQQPPQPPGAVSGASAGAAQPPGAGPPPAGHQIVHVRGDSETDLEAL  
FNAVMNPKGANVPHTLPMRLRKLKLPDSFFKPPPEPKAHSRQASTDAGTAGALTPQHVRHSSPASLQLGAVSPGTLT  
PSGVVTGPGAPSSQHLRQSSFEIPDDVPLPPGWEMAKTPSGQRYFLNHIDQTTTQWQDPRKAMLSQMNVTAPTS  
VQQNIMNSASGPLPDGWEQAMTQDGEIYYINHKNKTTSWLDPRLDPRFAMNQRISQSAPVKQPPPLAPQSPQGGV  
MGGSSSNQQQQMRLQQLQMEKERLRLKHQELLRQALRNINPSTANSPKHQELALRSQLPTMEQDGGSQNPVSSPG  
MSQELRTMTTNSDDPFLNSGTYHSRDESTDSGLSMSSYSVPRTPDDFLNSVDEMDTGDSIGQSNIPSHQNRFPDY

LEAIPGTNVDLGTLEGDMNIEGEELMPSLQEQALSSDILNDMESVLAATKLDKESFLTWL  
PMRLRKLPSFFKPP

rs:XP\_027493970 [XP\_027493970] transcriptional coactivator YAP1 isoform  
X3 [Corapipo altera].>rs:XP\_027594863 [XP\_027594863] transcriptional  
coactivator YAP1 isoform X3 [Pipra filicauda]. 86..100

MDPGQPQAQQPPQAAQPPAPQQQQQPPQPPGAVSGASAGAAQPPGAGPPPAGHQIVHVRGDSETDLEAL  
FNAVMNPKGANVPHTLPMRLRKLPSFFKPPPEPKAHSRQASTDAGTAGALTPQHVRHSSPASLQLGAVSPGTLT  
PSGVVTGPGAPSSQHLRQSSFEIPDDVPLPPGWEMAKTPSGQRYFLNHIDQTTTWQDPRKAMLSQMNVTAPTS  
VQQNIMNSASGPLPDGWEQAMTQDGEIYYINHKNKTTSWLDPRLDPRFAMNQRISQSAPVKQPPPLAPQSPQGGV  
MGGSSSNQQQQMRLQQLQMEKERLRLKHQELLRQVRPQELALRSQLPTMEQDGGSQNPVSSPGMSQELRTMTTNS  
SDPFLNSGTYHSRDESTDSGLSMSSYSVPRTPDDFLNSVDEMMDTGDSIGQSNIPSHQNRFPDYLEAIPGTNVDLGT  
LEGDMNIEGEELMPSLQEQALSSDILNDMESVLAATKLDKESFLTWL PMRLRKLPSFFKPP

rs:XP\_027494051 [XP\_027494051] transcriptional coactivator YAP1 isoform  
X4 [Corapipo altera].>rs:XP\_027594864 [XP\_027594864] transcriptional  
coactivator YAP1 isoform X4 [Pipra filicauda]. 86..100

MDPGQPQAQQPPQAAQPPAPQQQQQPPQPPGAVSGASAGAAQPPGAGPPPAGHQIVHVRGDSETDLEAL  
FNAVMNPKGANVPHTLPMRLRKLPSFFKPPPEPKAHSRQASTDAGTAGALTPQHVRHSSPASLQLGAVSPGTLT  
PSGVVTGPGAPSSQHLRQSSFEIPDDVPLPPGWEMAKTPSGQRYFLNHIDQTTTWQDPRKAMLSQMNVTAPTS  
VQQNIMNSASGPLPDGWEQAMTQDGEIYYINHKNKTTSWLDPRLDPRFAMNQRISQSAPVKQPPPLAPQSPQGGV  
MGGSSSNQQQQMRLQQLQMEKERLRLKHQELLRQELALRSQLPTMEQDGGSQNPVSSPGMSQELRTMTTNSSDPF  
LNSGTYHSRDESTDSGLSMSSYSVPRTPDDFLNSVDEMMDTGDSIGQSNIPSHQNRFPDYLEAIPGTNVDLGTLEG  
DMNIEGEELMPSLQEQALSSDILNDMESVLAATKLDKESFLTWL PMRLRKLPSFFKPP

rs:XP\_027494136 [XP\_027494136] transcriptional coactivator YAP1 isoform  
X5 [Corapipo altera].>rs:XP\_027594865 [XP\_027594865] transcriptional  
coactivator YAP1 isoform X5 [Pipra filicauda]. 86..100

MDPGQPQAQQPPQAAQPPAPQQQQQPPQPPGAVSGASAGAAQPPGAGPPPAGHQIVHVRGDSETDLEAL  
FNAVMNPKGANVPHTLPMRLRKLPSFFKPPPEPKAHSRQASTDAGTAGALTPQHVRHSSPASLQLGAVSPGTLT  
PSGVVTGPGAPSSQHLRQSSFEIPDDVPLPPGWEMAKTPSGQRYFLNHIDQTTTWQDPRKAMLSQMNVTAPTS  
VQQNIMNSASAMNQRISQSAPVKQPPPLAPQSPQGGVMGGSSSNQQQQMRLQQLQMEKERLRLKHQELLRQVRPQ  
ALRNINPSTANSPKHQELALRSQLPTMEQDGGSQNPVSSPGMSQELRTMTTNSSDPFLNSGTYHSRDESTDSGLS  
MSSYSVPRTPDDFLNSVDEMMDTGDSIGQSNIPSHQNRFPDYLEAIPGTNVDLGTLEGDMNIEGEELMPSLQEQAL  
SSDILNDMESVLAATKLDKESFLTWL PMRLRKLPSFFKPP

rs:XP\_027494208 [XP\_027494208] transcriptional coactivator YAP1 isoform  
X6 [Corapipo altera].>rs:XP\_027594866 [XP\_027594866] transcriptional  
coactivator YAP1 isoform X6 [Pipra filicauda]. 86..100

MDPGQPQAQQPPQAAQPPAPQQQQQPPQPPGAVSGASAGAAQPPGAGPPPAGHQIVHVRGDSETDLEAL  
FNAVMNPKGANVPHTLPMRLRKLPSFFKPPPEPKAHSRQASTDAGTAGALTPQHVRHSSPASLQLGAVSPGTLT  
PSGVVTGPGAPSSQHLRQSSFEIPDDVPLPPGWEMAKTPSGQRYFLNHIDQTTTWQDPRKAMLSQMNVTAPTS  
VQQNIMNSASAMNQRISQSAPVKQPPPLAPQSPQGGVMGGSSSNQQQQMRLQQLQMEKERLRLKHQELLRQALRN  
INPSTANSPKHQELALRSQLPTMEQDGGSQNPVSSPGMSQELRTMTTNSSDPFLNSGTYHSRDESTDSGLSMSSY  
SVPRTPDDFLNSVDEMMDTGDSIGQSNIPSHQNRFPDYLEAIPGTNVDLGTLEGDMNIEGEELMPSLQEQALSSDI  
LNDMESVLAATKLDKESFLTWL PMRLRKLPSFFKPP

rs:XP\_027494287 [XP\_027494287] transcriptional coactivator YAP1 isoform  
X7 [Corapipo altera].>rs:XP\_027594867 [XP\_027594867] transcriptional  
coactivator YAP1 isoform X7 [Pipra filicauda]. 86..100

MDPGQPQAQQPPQAAQPPAPQQQQQPPQPPGAVSGASAGAAQPPGAGPPPAGHQIVHVRGDSETDLEAL  
FNAVMNPKGANVPHTLPMRLRKLPSFFKPPPEPKAHSRQASTDAGTAGALTPQHVRHSSPASLQLGAVSPGTLT  
PSGVVTGPGAPSSQHLRQSSFEIPDDVPLPPGWEMAKTPSGQRYFLNHIDQTTTWQDPRKAMLSQMNVTAPTS  
VQQNIMNSASAMNQRISQSAPVKQPPPLAPQSPQGGVMGGSSSNQQQQMRLQQLQMEKERLRLKHQELLRQVRPQ  
ELALRSQLPTMEQDGGSQNPVSSPGMSQELRTMTTNSSDPFLNSGTYHSRDESTDSGLSMSSYSVPRTPDDFLNS  
VDEMMDTGDSIGQSNIPSHQNRFPDYLEAIPGTNVDLGTLEGDMNIEGEELMPSLQEQALSSDILNDMESVLAATK  
LDKESFLTWL PMRLRKLPSFFKPP



rs:XP\_027494371 [XP\_027494371] transcriptional coactivator YAP1 isoform X8 [Corapipo altera].>rs:XP\_027594868 [XP\_027594868] transcriptional coactivator YAP1 isoform X8 [Pipra filicauda]. 86..100

MDPGQPQAQPPQAQPPAPQOQQOQPQPPGAVSGASAGAAQPPGAGPPPAGHQIVHVRGDSETDLEAL  
FNAVMPKGANVPHTLPMRLRKLKLPDSFFKPPPEPKAHSRQASTDAGTAGALTPQHVRHSSPASLQLGAVSPGTLT  
PSGVVTGPGAPSSQHLRQSSFEIPDDVPLPPGWEMAKTPSGQRYFLNHIDQTTTWQDPRKAMLSQMNVTAPTS  
VQQNIMNSASAMNQRISQSAPVKQPPPLAPQSPQGGVMGGSSSNQOQOQMRLOQLQMEKERLRLKHQELLRQELAL  
RSQLPTMEQDGGSONPVSSPGMSQELRTMTTNSDDPFLNSGTYHSRDESTDSGLSMSSYSVPRTPDDFLNSVDEM  
DTGDSIGQSNIPSHQNRFPDYLEAIPGTNVDLGTLEGDGMNIEGELMPSLQEQALSSDILNDMESVLAATKLDKE  
SFLTWL PMRLRKLKLPDSFFKPP

rs:XP\_027511708 [XP\_027511708] protein FAM181B [Corapipo altera].  
169..183

MAAPAALLSPHLLSFCFPAAGGLLGYADLEKGYEGGGDAGDFREATRDLLSFIDSASSNIKLALDRP  
VKSRRKVNHRKYLQKQIKRGTGIIAAAAPPASCPPAACSTRPPRREPAQAAGSSLQSKSLAALFGSLQRGRGA  
AGGAEAKAGGGGGGGEKAAGGPRKVPLRDRNLPPSFFTEPALPAPAARGPPAKEPEKGGGAAEASEFFELLCPEY  
GALLPEHAAPPDAFGGRLPAELGLEHGLYELPLPAGPHLLGGLLYPEPPWSPAAPCSPPRKAPPEPLRPLYAGG  
PDPVPGGGGGSTEEPGGHLAGFAPFFPECPLAPPQPPYDYGAGYHRAGYPGLPLRDRNLPPSFFTEP

rs:XP\_027494005 [XP\_027494005] protein FAM181A [Corapipo altera].  
127..141

MASDSEVKTLNLFVNLAASSDIKAALDKSAPCRRSVDHRKYLQKQLKRFSQKYSRMPRCHPSKPPECGWR  
RGAEDRGRGPQPEAPDPSPHGGAATEKVMQTAEAEESLTGERVLQEQKPEAVRPDQVPMRKRQLPASFWEEP  
QSLTARAFPASPEGLPAPRDPYEGKSKWSPDAASPESPPDPAPHAGEKDPAGVLSRVGAWTCCFPFCPGTG  
VYQPPGALPPSPFPGLGLWRKSAATLPAEVPHFCKEADGTGQKLYRPMVLKPIPTKPAIPPIFNVFGYL  
PMRKRQLPASFWEEP

rs:XP\_027510795 [XP\_027510795] sentrin-specific protease 3 isoform X1  
[Corapipo altera]. 171..185

MAGRQRQGVIIQPLAELRLPSPFFPHGLLLPHTPEPDFHNLSEEEEEEEEEEEEEEEEEVEAAEENVRPEPAI  
SSTAETTLRLLKFSELISCDIQRYFGRRGREEAASTQVPVKDCESPLSAGAQPEAPRGSPGAAHRLGPLAELFEY  
GVHRCLSPRAAGGRTQRLERKYGHITPMHRRKLPPSFWKEPGPASLLHTSTPDFSDLLANWTVEPGPELPCAGRE  
LPLELGRPGLEAEPFTGL PMHRRKLPPSFWKEP

rs:XP\_027510796 [XP\_027510796] sentrin-specific protease 3 isoform X2  
[Corapipo altera]. 167..181

MAAGVIQPLAELRLPSPFFPHGLLLPHTPEPDFHNLSEEEEEEEEEEEEEEEEEVEAAEENVRPEPAISSTA  
ETTLRLLKFSELISCDIQRYFGRRGREEAASTQVPVKDCESPLSAGAQPEAPRGSPGAAHRLGPLAELFEYGVHR  
CLSPRAAGGRTQRLERKYGHITPMHRRKLPPSFWKEPGPASLLHTSTPDFSDLLANWTVEPGPELPCAGRELPLE  
LGRPGLEAEPFTGL PMHRRKLPPSFWKEP

rs:XP\_002037503 [XP\_002037503] GM18275 [Drosophila  
sechellia].>tr:B4I2C6\_DROSE [B4I2C6] SubName: Full=GM18275  
{ECO:0000313|EMBL:EDW53921.1}; 61..75

MSASSNTNSLIEKEIDDEDMLSPIKSNLNVVRVNQDITDNLQALFDSVLNPGDAKRPLQLPLMRKLPN  
SFFTPPAPSHSRANSADSTYDAGSQSSINIGNKASIVQQPDGQSPIAAIPQLQIQPSPQHSRLAIHHSRARSSPA  
SLQQNYNVRARSDAAAANNPNANPSSQQQPAGPTFPENSAQEFPSGAPASSAIDLAMNTCMSQDIPMSMQTVHK  
KQRSYDVISPIQLNRQLGALPPGWEQAKTNDGQIYYLNHTTKSTQWEDPRIQYRQQQILMAERIKQNDVLQTTK  
QTTTSTIANNLGPLPDGWEQAVTESGDLYFINHIDRTTSWNDPRMQSGLSVLDCPDNLVSSLQIEDNLCSNLFND  
AQAIVNPSSSHKPDDELEWYKIN PLRMRKLPNSFFTPP

rs:XP\_014443915 [XP\_014443915] transcriptional coactivator YAP1 [Tupaia  
chinensis]. 85..99

MDPGQPPPPQAPQGGPQPPAQPPQGGPPSAPGQPAAPASQAAPQAPPAGHQIVHVRGDSETDLEALF  
NAVMPNKTANVPQTVPMRLRKLKLPDSFFKPPPEPKSHSRQASTDAGTAGALTPQHVRHSSPASLQLGAVSPGTLT  
TGVVAGPTSTPAAQHLRQSSFEIPDDVPLPAGWEMAKTSSGQRYFLNHIDQTTTWQDPRKAMLSQMNVTAPTS  
VQQSMMNSASGPLPDGWEQAMTQDGEIYYINHKNTTSLWDLRDLPRFAMNQRISQSAPVKQPPPLAPQSPQGGV  
MGGGSSNQQOQMRLOQLQMEKERLRLKHQELLRQAMRNINPSTANSKQELALRSQLPTLEQDGGTQNPVSSPG  
MSQELRTMTTNSDDPFLNSGTYHSRDESTDSGLSMSSYSVPRTPDDFLNSVDEMDTGDITNQSTLPSQQSRFPDY

LEAIPGTNVDLGTLEGDMNIEGEELMPSLQEALSSDILNDMESVLAATKLDKESFLTWL  
PMRLRKL PDSFFKPP

rs:XP\_005241985 [XP\_005241985] protein **FAM181A** [Falco peregrinus].  
127..141

MASDSEVKTLNLFVNLASSDIKAALDKSAPCRRSVDHRKYLQKQLKRFSQKYSRI PRCHPSKPPECSWR  
RGTEDRGRGPQPEAPDPSPPGGAATEKVPQTAEAEENLAGERVLQEONPEATRPDQVPMRKRQLPASFWEEP  
QSLPARAFPAGPEGVPAPRDPPEYEGKSKRSPDAAGPESPPEPAPHAGEKDPAGVLSGRVGAWTCCPFPCPLG  
VYQPPSTLPPSPFPGLGLWRKSVAAALPAEVPPFCKEAEGTGQKLYRPVVLKPIPTKPAVPPPIFNVFGYL  
PMRKRQLPASFWEEP

rs:XP\_027651996 [XP\_027651996] uncharacterized protein LOC114014024  
[Falco peregrinus]. 186..200

MHGWAAPRVSPGPGVPLRADMAAGVIQPLAELRLPSFPFHGLLLPARPEPDFPDLSEEEEEEEEEEEEE  
EVAEESMRPELAIPSAEATLRLKLFSELISCDIQRYFGRQGRDEAIISSRSMPEDCGSPRNVEAQQEATAPRGSP  
GAMHRLGPLAELFEYGMHRCLPAQAAGGKTQRLEKKGHITPMHRRKLPSPFWREP  
ANWTVEPGPELDPARQELPPEPGQPGLEAEPFAGL PMHRRKLPSPFWREP

rs:XP\_027657652 [XP\_027657652] uncharacterized protein LOC114015261  
[Falco cherrug]. 146..160

MHGWAAPRVSPGPGVPLSADMAAGVIQPLAELRLPSFPFHGLLLPARPEPDFPDLSEEEEEEEEEEEEE  
VAEESMRPELAIPSAEATLRLKLFSELISCDIQRYFGRQGRDEATSSRSMPEDSLPPRAAVGKTQRLEKKGHIT  
TPMHRKLPSPFWREP  
SPTSLLHAGTPDFSDLLANWTVEPGPELDPARQELPPEPGQPGLEAEPFAGL  
PMHRRKLPSPFWREP

rs:XP\_005438929 [XP\_005438929] protein **FAM181A** [Falco cherrug].127..141

MASDSEVKTLNLFVNLASSDIKAALDKSAPCRRSVDHRKYLQKQLKRFSQKYSRI PRCHPSKPPECSWR  
RGAEDRGRGPQPEAPDPSPPGGAATEKVPQTAEAEENLAGERVLQEONPEATRPDQVPMRKRQLPASFWEEP  
QSLPARAFPAGPEGVPAPRDPPEYEGKSKRSPDAAGPESPPEPAPHAGEKDPAGVLSGRVGAWTCCPFPCPLG  
VYQPPSTLPPSPFPGLGLWRKSVAAALPAEVPPFCKEAEGTGQKLYRPVVLKPIPTKPAVPPPIFNVFGYL  
PMRKRQLPASFWEEP

rs:XP\_006165466 [XP\_006165466] protein **FAM181A** [Tupaia chinensis].  
129..143

MASDSVDMKLLNLFVNLASSDIKAALDKSAPCRRSVDHRKYLQKQLKRFSQKYSRLPRGLPSRVAEPLK  
RGPQDRPGRPLPLDSGPDSSPGGGGCKEALGSPYGEELCKEQTTLRGQNPAAARPGQVPMRKRQLPASFWEEP  
PTHSYPMGLEGLGPREGPPYEGKKNCKGLEPLGPETAPMPVSPRALAEKEPLKMPGVSLVGRVNAWSCC  
PFQCH  
GQPLYPGPPGALPQSPVPSLGLWRKNPTSPGEPGEPAPFCKDVSGLQKVHRPVVLKPSPTKPAVPPPIFNVFGY  
L PMRKRQLPASFWEEP

rs:XP\_027675589 [XP\_027675589] transcriptional coactivator YAP1 [Chelonia  
mydas]. 73..87

MDPGPQQQQAQPPAQPPGAPSGAGQPPGAGPPPAGHQIVHVRGDSETDLEALFNAVMPKGANVP  
HTLPMRLRKL PDSFFKPPPEPKAHSRQASTDGGGAGALTPQHVRHSSPASLQLGAVSPGTLTPSGVVTPGGAAPS  
SQHLRQSSFEIPDDVPLPPGWEMAKTPSGQRYFLNHIDQTTTWQDPRKAILSQMNVTAPTSPVQONIMNSASGP  
LPDGWEQAMTQDGEIYYINHKNKTTSWLDPRLDPRFAMNQRISQSAPVKQPPPLAPQSPQGGVMGGSSNQQQM  
RLQQLQMEKERLRLKHQELLRQALRNINPSTANS PKRQELALRSQLPTMEQDGGSONPVSSPGMSQELRTMTTNS  
SDPFLNSGTYHSRDESTDSGLSMSSYSVPRTPDDFLNSVDEM TDGDISQSNIPSHQNRFPDYLEAIPGTNVDLGT  
LEGDMNIEGEELMPSLQEALSSDILNDMESVLAATKLDKESFLTWL PMRLRKL PDSFFKPP

rs:XP\_007063510 [XP\_007063510] protein **FAM181A** [Chelonia  
mydas].>rs:XP\_007063511 [XP\_007063511] protein **FAM181A** [Chelonia  
mydas].>tr:M7BWC5\_CHEMY [M7BWC5] SubName: Full=Uncharacterized protein  
{ECO:0000313|EMBL:EMP32407.1}; 126..140

MASDSEVKTLNLFVNLASSDIKAALDKSAPCRRSVDHRKYLQKQLKRFSQKYSRI PRCHPSKSMESSK  
RGAEDRNRSSDPDGMNDPNHCTVSSEKALRLSEVAENFSGEQVLQEQSPESVSRPDQVPMRKRQLPASFWEEP  
RPTQ  
SLLVGSFPAGLDGLPNRDLPPYEGKSKKGPDTTEPDSPLPAQPSGEKEPIKVPGTSLSGRMNAWSCC  
PFQYH  
GQPVYQTHGALPQSPFPGLGLWRKSTAPTGEIQHFCKEVEGSMGQKLYRPVVLKPIPTKPAVPPPIFNVFGY I  
PMRKRQLPASFWEEP

rs:XP\_027684642 [XP\_027684642] uncharacterized protein LOC114021042 [Chelonia mydas].>tr:M7B1Z9\_CHEMY [M7B1Z9] SubName: Full=Uncharacterized protein {ECO:0000313|EMBL:EMP29460.1}; 208..222

MAAGVIRNLPFRLPASFQHSFLHPTPPQDMDFQDLSDEEEVEEEEDDYDVEEQDSPPCHSPGTEGQKVT  
ADCSQSDAEMTLQLLKFSELISCDIQRYFGRKAKDEDPDSCNIYEDCFSPRRLGRELYYADLMRLAQSGELDDED  
AQQPVPAPPGQLDQRVWRSICNKDGVQKLGPLAELFEYGLHRFLKRRAADGRKLRLEKKDAHIMPMMHKKLPQSF  
KEPSPGPPCILNTNPPDFSDLLANWTSEPGQEQLPSTGRELARPAMETDQFSVL PMHKKRKLQSFWKEP

rs:XP\_027738549 [XP\_027738549] sentrin-specific protease 3 isoform X1 [Empidonax traillii]. 171..185

MAGQQRQGVIQPLAELRLPSFPFHGLLLPTHPEPDFHDLSEEEEEEEEEEEEEEEEEVEAAEESVRPEPAA  
SSTAETTLRLLKFSELISCDIQRYFGRRGREEAASTQVPVKDCGSPQSAGAQPEAPRGSPGAAHRLGPLAELFEY  
GVHRCLSPRAAGGRTQRLERKYGHITPMHRRKLPSPFWKEP GPAGLLHTGTPDFSDLLANWTVEPGPELPCAGRE  
LPLEPGRPGLEAEPFTGL PMHRRKLPSPFWKEP

rs:XP\_027738550 [XP\_027738550] sentrin-specific protease 3 isoform X2 [Empidonax traillii]. 167..181

MAAGVIQPLAELRLPSFPFHGLLLPTHPEPDFHDLSEEEEEEEEEEEEEEEEEVEAAEESVRPEPAA  
SSTAETTLRLLKFSELISCDIQRYFGRRGREEAASTQVPVKDCGSPQSAGAQPEAPRGSPGAAHRLGPLAELFEYGVHR  
CLSPRAAGGRTQRLERKYGHITPMHRRKLPSPFWKEP GPAGLLHTGTPDFSDLLANWTVEPGPELPCAGRELPLE  
PGRPGLEAEPFTGL PMHRRKLPSPFWKEP

rs:XP\_027740276 [XP\_027740276] protein **FAM181B** [Empidonax traillii]. 170..184

MAAPAALLSPHLLSFCFPAAGGLLYADLEKGYEGGGGGDAGDFREATRDLLSFIDSASSNIKLALDR  
PVKSRRKVNHRKYLQKQIKRCTGIIAAAAPPPAACPPAAC SARPPPRREPAQAAGSSLQSKSLAALFGSLQRGRG  
AAGGAEARAGGGGGGEKAAGGPRKVPDRNLPPSFFTEPALPAPAARGPPAKEPEKGGGAAEASEFFELLCP  
YGALLPEHAAPPDAFGRLPAELGLEHGLYELPLPAGPHLLGGLLYPEPPWSPAAPCSPPRKAPPEPLRPLYPG  
GPEPVPGGGGSTEEPGGHLPAGFAPFFPECPLAPPQPPYDYGAGYPRTGYPGLPLRDRNLPPSFFTEP

rs:XP\_027786455 [XP\_027786455] transcriptional coactivator YAP1 isoform X1 [Marmota flaviventris]. 85..99

MDPGQQPQPQPAPQGGQPPAQPPQGGQPTSGPGQPAPPASQAAPQAPPAGHQIVHVRGDSETDLEALF  
NAVMPKNTANVPQTVPMRLRKLKLPDSFFKPPPEPKSHSRQASTDAGTAGALTPQHVRHSSPASLQLGAVSPGTLTP  
TGVVSGPAATPTAQHLRQSSFEIPDDVPLPAGWEMAKTSSGQRYFLNHIDQTTTWQDPRKAMLSQMNVPAPTSPP  
VQQNLMNTPSGPLPDGWEQAMTQDGEIYYINHKNKTTSWLDPRLDPRFAMNQRIQSAPVKQPPPLAPQSPQGGV  
MGSGNSNQQQQMRLQQLQMEKERLRLKQOELLRQVRPQAMRNINPSTANS PKCQELALRSQLPTLEQDGGTQNPV  
SSPGMSQELRTMTTNSSDPFLNSGTYHSRDESTDSGLSMSSYSVPRTPDDFLNSVDEMDTGDTINQSTLPSQQNR  
FPDYLEAIPGTNVDLGTLEGDGMNIEGEELMPSLQEQALSSDILNDMESVLAATKLDKESFLTWL  
PMRLRKLKLPDSFFKPP

rs:XP\_027786456 [XP\_027786456] transcriptional coactivator YAP1 isoform X2 [Marmota flaviventris]. 85..99

MDPGQQPQPQPAPQGGQPPAQPPQGGQPTSGPGQPAPPASQAAPQAPPAGHQIVHVRGDSETDLEALF  
NAVMPKNTANVPQTVPMRLRKLKLPDSFFKPPPEPKSHSRQASTDAGTAGALTPQHVRHSSPASLQLGAVSPGTLTP  
TGVVSGPAATPTAQHLRQSSFEIPDDVPLPAGWEMAKTSSGQRYFLNHIDQTTTWQDPRKAMLSQMNVPAPTSPP  
VQQNLMNTPSGPLPDGWEQAMTQDGEIYYINHKNKTTSWLDPRLDPRFAMNQRIQSAPVKQPPPLAPQSPQGGV  
MGSGNSNQQQQMRLQQLQMEKERLRLKQOELLRQVRPQELALRSQLPTLEQDGGTQNPVSSPG  
MSQELRTMTTNSSDPFLNSGTYHSRDESTDSGLSMSSYSVPRTPDDFLNSVDEMDTGDTINQSTLPSQQNRFPDY  
LEAIPGTNVDLGTLEGDGMNIEGEELMPSLQEQALSSDILNDMESVLAATKLDKESFLTWL  
PMRLRKLKLPDSFFKPP

rs:XP\_027786457 [XP\_027786457] transcriptional coactivator YAP1 isoform X3 [Marmota flaviventris]. 85..99

MDPGQQPQPQPAPQGGQPPAQPPQGGQPTSGPGQPAPPASQAAPQAPPAGHQIVHVRGDSETDLEALF  
NAVMPKNTANVPQTVPMRLRKLKLPDSFFKPPPEPKSHSRQASTDAGTAGALTPQHVRHSSPASLQLGAVSPGTLTP  
TGVVSGPAATPTAQHLRQSSFEIPDDVPLPAGWEMAKTSSGQRYFLNHIDQTTTWQDPRKAMLSQMNVPAPTSPP  
VQQNLMNTPSGPLPDGWEQAMTQDGEIYYINHKNKTTSWLDPRLDPRFAMNQRIQSAPVKQPPPLAPQSPQGGV  
MGSGNSNQQQQMRLQQLQMEKERLRLKQOELLRQVRPQELALRSQLPTLEQDGGTQNPVSSPGMSQELRTMTTNS

SDPFLNSGTYHSRDESTDSGLSMSSYSVPRTPDDFLNSVDEMDTGDTINQSTLPSQQNRFPDYLEAIPGTNVDLG  
TLEGDMNIEGEEELMPSLQEQALSSDILNDMESVLAATKLDKESFLTWL PMRLRKLPSDFFKPP

rs:XP\_027786458 [XP\_027786458] transcriptional coactivator YAP1 isoform  
X4 [Marmota flaviventris]. 70..84

MDPGQQPQPAPQGGQPPAPPASQAAPQAPPAGHQIVHVRGDSETDLEALFNAVMPKNTANVPQTV  
PMRLRKLPSDFFKPPEPKSHSRQASTDAGTAGALTPQHVAHSSPASLQLGAVSPGTLTPTGVVSGPAATPTAQH  
LRQSSFEIPDDVPLPAGWEMAKTSSGQRYFLNHIDQTTTWQDPRKAMLSQMNVPAPTSPPVQQNLNMNTPSGPLPD  
GWEQAMTQDGEIYYINHKNKTTSWLDPRLDPRFAMNQRIQSAPVKQPPPLAPQSPQGGVMGSGNSNQQQQMRLQ  
QLQMEKERLRLKQEQELLRQAMRNINPSTANSPKCQELALRSQLPTLEQDGGTQNPVSSPGMSQELRTMTTNSSDP  
FLNSGTYHSRDESTDSGLSMSSYSVPRTPDDFLNSVDEMDTGDTINQSTLPSQQNRFPDYLEAIPGTNVDLGTLE  
GDGMNIEGEEELMPSLQEQALSSDILNDMESVLAATKLDKESFLTWL PMRLRKLPSDFFKPP

rs:XP\_027786459 [XP\_027786459] transcriptional coactivator YAP1 isoform  
X5 [Marmota flaviventris]. 85..99

MDPGQQPQPAPQGGQPPAQQPPQGGQPTSGPGQPAPPASQAAPQAPPAGHQIVHVRGDSETDLEALF  
NAVMPKNTANVPQTVPMRLRKLPSDFFKPPEPKSHSRQASTDAGTAGALTPQHVAHSSPASLQLGAVSPGTLTPT  
TGVVSGPAATPTAQHLRQSSFEIPDDVPLPAGWEMAKTSSGQRYFLNHIDQTTTWQDPRKAMLSQMNVPAPTSPP  
VQQNLNMNTPSGPLPDGWEQAMTQDGEIYYINHKNKTTSWLDPRLDPRFAMNQRIQSAPVKQPPPLAPQSPQGGV  
MGSGNSNQQQQMRLQQLQMEKERLRLKQEQELLRQELALRSQLPTLEQDGGTQNPVSSPGMSQELRTMTTNSDPF  
LNSGTYHSRDESTDSGLSMSSYSVPRTPDDFLNSVDEMDTGDTINQSTLPSQQNRFPDYLEAIPGTNVDLGTLE  
GDMNIEGEEELMPSLQEQALSSDILNDMESVLAATKLDKESFLTWL PMRLRKLPSDFFKPP

rs:XP\_027786460 [XP\_027786460] transcriptional coactivator YAP1 isoform  
X6 [Marmota flaviventris]. 70..84

MDPGQQPQPAPQGGQPPAPPASQAAPQAPPAGHQIVHVRGDSETDLEALFNAVMPKNTANVPQTV  
PMRLRKLPSDFFKPPEPKSHSRQASTDAGTAGALTPQHVAHSSPASLQLGAVSPGTLTPTGVVSGPAATPTAQH  
LRQSSFEIPDDVPLPAGWEMAKTSSGQRYFLNHIDQTTTWQDPRKAMLSQMNVPAPTSPPVQQNLNMNTPSGPLPD  
GWEQAMTQDGEIYYINHKNKTTSWLDPRLDPRFAMNQRIQSAPVKQPPPLAPQSPQGGVMGSGNSNQQQQMRLQ  
QLQMEKERLRLKQEQELLRQELALRSQLPTLEQDGGTQNPVSSPGMSQELRTMTTNSDPFLNSGTYHSRDESTDS  
GLSMSSYSVPRTPDDFLNSVDEMDTGDTINQSTLPSQQNRFPDYLEAIPGTNVDLGTLEGDGMNIEGEEELMPSLQ  
EALSSDILNDMESVLAATKLDKESFLTWL PMRLRKLPSDFFKPP

rs:XP\_027786461 [XP\_027786461] transcriptional coactivator YAP1 isoform  
X7 [Marmota flaviventris]. 85..99

MDPGQQPQPAPQGGQPPAQQPPQGGQPTSGPGQPAPPASQAAPQAPPAGHQIVHVRGDSETDLEALF  
NAVMPKNTANVPQTVPMRLRKLPSDFFKPPEPKSHSRQASTDAGTAGALTPQHVAHSSPASLQLGAVSPGTLTPT  
TGVVSGPAATPTAQHLRQSSFEIPDDVPLPAGWEMAKTSSGQRYFLNHIDQTTTWQDPRKAMLSQMNVPAPTSPP  
VQQNLNMNTPSAMNQRIQSAPVKQPPPLAPQSPQGGVMGSGNSNQQQQMRLQQLQMEKERLRLKQEQELLRQVRPQ  
AMRNINPSTANSPKCQELALRSQLPTLEQDGGTQNPVSSPGMSQELRTMTTNSDPFLNSGTYHSRDESTDSGLS  
MSSYSVPRTPDDFLNSVDEMDTGDTINQSTLPSQQNRFPDYLEAIPGTNVDLGTLEGDGMNIEGEEELMPSLQEQAL  
SSDILNDMESVLAATKLDKESFLTWL PMRLRKLPSDFFKPP

rs:XP\_027786462 [XP\_027786462] transcriptional coactivator YAP1 isoform  
X8 [Marmota flaviventris]. 85..99

MDPGQQPQPAPQGGQPPAQQPPQGGQPTSGPGQPAPPASQAAPQAPPAGHQIVHVRGDSETDLEALF  
NAVMPKNTANVPQTVPMRLRKLPSDFFKPPEPKSHSRQASTDAGTAGALTPQHVAHSSPASLQLGAVSPGTLTPT  
TGVVSGPAATPTAQHLRQSSFEIPDDVPLPAGWEMAKTSSGQRYFLNHIDQTTTWQDPRKAMLSQMNVPAPTSPP  
VQQNLNMNTPSAMNQRIQSAPVKQPPPLAPQSPQGGVMGSGNSNQQQQMRLQQLQMEKERLRLKQEQELLRQAMRN  
INPSTANSPKCQELALRSQLPTLEQDGGTQNPVSSPGMSQELRTMTTNSDPFLNSGTYHSRDESTDSGLSMSSY  
SVPRTDFFLNSVDEMDTGDTINQSTLPSQQNRFPDYLEAIPGTNVDLGTLEGDGMNIEGEEELMPSLQEQALSSDI  
LNDMESVLAATKLDKESFLTWL PMRLRKLPSDFFKPP

rs:XP\_027786463 [XP\_027786463] transcriptional coactivator YAP1 isoform  
X9 [Marmota flaviventris]. 85..99

MDPGQQPQPAPQGGQPPAQQPPQGGQPTSGPGQPAPPASQAAPQAPPAGHQIVHVRGDSETDLEALF  
NAVMPKNTANVPQTVPMRLRKLPSDFFKPPEPKSHSRQASTDAGTAGALTPQHVAHSSPASLQLGAVSPGTLTPT  
TGVVSGPAATPTAQHLRQSSFEIPDDVPLPAGWEMAKTSSGQRYFLNHIDQTTTWQDPRKAMLSQMNVPAPTSPP  
VQQNLNMNTPSAMNQRIQSAPVKQPPPLAPQSPQGGVMGSGNSNQQQQMRLQQLQMEKERLRLKQEQELLRQVRPQ

ELALRSQLPTLEQDGGTQNPVSSPGMSQELRTMTTNSSDPFLNSGTYHSRDESTDSGLSMSSYSVPRTPDDFLNS  
VDEMDTGDTINQSTLPSQQNRFPDYLEAIPGTNVDLGTLEGDGMNIEGELMPSLQEQALSSDILNDMESVLAATK  
LDKESFLTWL PMRLRKLKLPDSFFKPP

rs:XP\_027786464 [XP\_027786464] transcriptional coactivator YAP1 isoform  
X10 [Marmota flaviventris]. 85..99

MDPGQQPQPAPQGGQPPAQPPQGGPTSGPGQPAPPASQAAPQAPPAGHQIVHVRGDSETDLEALF  
NAVMNPKTANVPQTVPMRLRKLKLPDSFFKPPPEPKSHSRQASTDAGTAGALTPQHVRHSSPASLQLGAVSPGTLTP  
TGVVSGPAATPTAQHLRQSSFEIPDDVPLPAGWEMAKTSSGQRYFLNHIDQTTTWDPRKAMLSQMNVPAPTSPP  
VQQNLMNTPSAMNQRISQSAPVKQPPPLAPQSPQGGVMGSGNSNQQQMRLQQLQMEKERLRLKQQELLRQELAL  
RSQLPTLEQDGGTQNPVSSPGMSQELRTMTTNSSDPFLNSGTYHSRDESTDSGLSMSSYSVPRTPDDFLNSVDEM  
DTGDTINQSTLPSQQNRFPDYLEAIPGTNVDLGTLEGDGMNIEGELMPSLQEQALSSDILNDMESVLAATKLDKE  
SFLTWL PMRLRKLKLPDSFFKPP

rs:XP\_027787266 [XP\_027787266] protein **FAM181A** [Marmota  
flaviventris].>rs:XP\_027787267 [XP\_027787267] protein **FAM181A** [Marmota  
flaviventris].>rs:XP\_015345156 [XP\_015345156] PREDICTED: protein **FAM181A**  
[Marmota marmota marmota]. 129..143

MASDNDVKMLLNFNVLASSDIKAALDKSAPCRRSVDHRKYLQKQLKRFSQKCSRLPRGLPGRAAEPHLK  
RGPEDRPGRLPLHSGPGASPGGGGGCKEKALGNPWREERLPKEQSPQGTPEAAKPGQVPMRKRQLPASFWEEP  
PTHSCPLGLEGLGPREGPPYESSKKSCKGLESLGPETAPVPMSPRALADKEPLKMPGVSLVGRVDAWSCCPLQYH  
GQPMYPGPPGALPHSQVPGLCCLWRKSPASPGELAHFCKDVEGPGQKVHRPVVLKPIPTKPAVPPPIFNVFYGL  
PMRKRQLPASFWEEP

rs:XP\_027798304 [XP\_027798304] protein **FAM181B** [Marmota flaviventris].  
221..235

MAVQAALLSTHPFVFPFGGGSPDGLGSTFGALDKCCFEDEETGAPAGALLSGAEGGDVREATRDLLSF  
IDSASSNIKLALDKPGKSKRVNHRKYLQKQIKRCNGLMGAAPPSPSAADTPAKRPLAAPSASTAAAPVHGK  
AAPRREASQAAAAASLQSRSLAALFDSL RHVSGGAEPVGGAVAVPVVTGLGGASSGGAGGEASGLAGGTAVPGARK  
VPLRARNLPPSFFTEPSRAGGGGGCGSPGVS LGDLEKGAEAFFELLGSDYAGTEAGVLLAAEPLDVFPPT  
GAAVLRGPLELEPLGFEPAMVGNLIYEPWSPASCAPT KKS PVAARGGLTLNESLRPLYPAPSDSPGGEDGT  
GHLASFAPFFPDCTLSPPPPPHQVSYDYSAGYSSAAYSSLWRPDGVWEGAPGEEGAHRD  
PLRARNLPPSFFTEP

rs:XP\_027840529 [XP\_027840529] transcriptional coactivator YAP1-like  
[Aphis gossypii]. 67..81

MSGLQQQQEQHQQVNIKMEPTGPGSPTPAPVNSNLVVRVDQNSSETDLQALFDTVLKPDGKKPLQLPLR  
MRQLPKSFFNPPSTGSKSPSISHSRENSGDSAFGPAAGQPCVPMHSRAHSSPASLQQTAYAVGVAKQQQQQQQ  
HAKQRSYDVSSAIDELGPLPQGWQARTPEGQIYYLNHLTRTTQWEDPRKSLAAQAANQHQRSAEQLLSPGNDG  
SSTNATSTPTNSPPIHSTLQGTNKNVTLGPLPDGWEQAVTGDGETYFINHIARTTSWFDPRIPVHLQRAPTS  
GAVLPSGSASWLLNGASGLSLSLQVTQQKLRHLHLQLERERLKSQQEII RQQDLMLRPGQTNNDLDPFLSCSS  
SSV DHRQESADSGGLGNNYSLPHTPEDFLSSNMDDNMDCTSESDNPGPSSDMSVVDSDQEMATLDVTDL  
VPSLQLGDEFNGDILDEVSLLDIPNNKPGSILTWIILS QKSLKLNRF CFYSHLTRTTQWEDPRKSLAAQAAN  
QHQRSAEQLLSPGNDGSSSTNATSTPTNSPPIHSTLQGTNKNVTLGPLPDGWEQAVTGDGETYFINHIARTTS  
WFDPRIPVHLQRAPTS GAVLPSGSASWLLNGASGLSLSLQVTQQKLRHLHLQLERERLKSQQEII RQQDL  
MLRPGQTNNDLDPFLSCSSSSVDHRQESADSGGLGNNYSLPHTPEDFLSSNMDDNMDCTSESDNPGPSSDMS  
VVDSDQEMATLDVTDL VPSLQLGDEFNGDILDEVSLLDIPNNKPGSILTWL PLRMRQLPKSFFNPP

rs:XP\_027840585 [XP\_027840585] transcriptional coactivator yorkie-like  
[Aphis gossypii]. 66..80

MSGLQQQQEQHQQVNIKMEPTGPGSPTPAPVNSNLVVRVDQNSSETDLQALFDTVLKPDGKKPLQLPLRM  
RQLPKSFFNPPSTGSKSPSISHSRENSGDSAFGPAAGQPCVPMHSRAHSSPASLQQTAYAVGVAKQQQQQQHQH  
AKQRSYDVSSAIDELGPLPQGWQARTPEGQIYYLK PLRMRQLPKSFFNPP

rs:XP\_002433100 [XP\_002433100] 65 kDa Yes-associated protein, putative  
[Pediculus humanus corporis].>tr:E0W406\_PEDHC [E0W406] SubName: Full=65 kDa  
Yes-associated protein, putative {ECO:0000313|EMBL:EEB20362.1,  
ECO:0000313|VectorBase:PHUM613740-PA}; 111..125

MPSGNSNPSNNNTSSNNSSGNSNSNGRESSNSNSNNNNNANNNSNNNNNSNNNNNSNSSSNNNS

NSSNKPSNSDNHVRIVQNSESDLQALFDSVLKPDSCRPLQVPHMRNLPDSFFTPPSTGSKSPSVLSISHSRENS  
ADAAFASTNTTTPASLQVNHPRAHSSPASLQQTYASAQQKNPPQAPQGVHTHIKQRSYDMGATVVDELGLPLPPGWEQ  
ARTSQGQIYYLNHITRSTTWEDPRKTLAAQNLQAQHAELQNSRGNQQNSAAAAAAKATTLGISAAGLGLPLPEGWE  
QSSTPEGEIYFINHQTRTTSWFDPRIPLQLQORSPTGLIIPHGNSWIQSSAQSSQNCQQELRVQLLQMERERLRQ  
RQEEIRRQQLMTRTTELPPGSMDFLSGLTDHGRQESTDSGLGMGNSYSLPQTPQDILDESMDGVSEGGHTDMT  
SLDNTDISTDDLVTLLGEDLTSIDLDVQSLINPTSTKPDNVLTWL PWHMRNLPDSFFTPP

rs:NP\_033560 [NP\_033560] transcriptional coactivator YAP1 isoform 2  
[Mus musculus].>gp:BC039125\_1 [BC039125] yes-associated protein 1 [Mus  
musculus]>gp:BC094313\_1 [BC094313] yes-associated protein 1 [Mus musculus]  
70..84

MEPAQQPPQPAPQGPAPPSVSPAGTPAAPPAPPAGHQVVHVRGDSETDLEALFNAVMMNPKTANVPQTV  
PMRLRKLKLPDSFFKPEPKSHSRQASTDAGTAGALTPQHVRHSSPASLQLGAVSPGTLTASGVVSGPAAAPAAQH  
LRQSSFEIPDDVPLPAGWEMAKTSSGQRYFLNHNDQTTTWQDPRKAMLSQLNVPAPASPAVPQTLMNSASGPLPD  
GWEQAMTQDGEVYYINHKNKTTSWLDPRLDPRFAMNQIRITQSAPVKQPPPLAPQSPQGGVLLGGSSNQQQIQLQ  
QLQMEKERLRLKQQLFRQELALRSQLPTLEQDGGTPNAVSSPGMSQELRTMTTNSSDPFLNSGTYHSRDESTDS  
GLSMSSYSIPRTPDDFLNSVDEMDTGDITISQSTLPSQQSRFPDYLEALPGTNVDLGTLEGDAMNIEGEEMLPSSLQ  
EALSSEILDVESVLAATKLDKESFLTWL PMRLRKLKLPDSFFKPE

rs:XP\_028014147 [XP\_028014147] LOW QUALITY PROTEIN: protein **FAM181B**  
[Eptesicus fuscus]. 223..237

MAVQAALLSTHPFVFFGFGGSPDGLGGAFGALDKGCCFEDDEPGMPAGALLAGTEGGDVREATRDLLSF  
IDSASSNIKALDKPGKSKRKNVHRKYLQKQIKRCSGLXXXXXXXXXXXXXXXXXXXXXXXXXXXXXXXXXXXX  
XXKAAPRRDASQAAAASLQSQSLAALFDSLHRVPGGADSAGGSGAAPPAGLVGAGSGGAGGDALGPAGGTAVPGA  
RKVPLRARNLPPSFFTEPSRTSGGGCGPSGCGVNLCDLEKGPETLEFFELLGPDYAGSEAGVLLAAEPLVFPFA  
GATVLRGPPPELEPLFEPPPAMGASLPYEPWAPACAPTCKKPSLAAPRGGSTLTEPLRLLYPAAVSSPGGEDGP  
GPLASFQFFSDCVLPPPPPPPPRQVSYDLACAGYGRAAYSGLWRPDGVWEGDPGEEGAPRD  
PLRARNLPPSFFTEP

rs:XP\_027992663 [XP\_027992663] protein **FAM181A** isoform X1 [Eptesicus  
fuscus]. 224..238

MLCIWRGAPDWPEGPPSSGDLSSIQPTRGRHNRFPDPSRSSRAARAWPRSAAGASRATLAGRARTLGQL  
CALPWSCQPRADHPLHGKPEVAPLVMASDSVDMKLLNFVNLASSDIKAALDKSAPCRRSVDHRKYLQKQLKRF  
QKYSRLPRGLPGRGAEPPLRRGPEDRPGRLPLNPGPDASPHSGGDCKEKALGNPYREECLSRQTLQGNPGAAR  
PGQVPMRKRQLPASFWEEPPTHSTYPVALEGLVGPREGPPYECKKHCRGLELFGPEMALIPMSPRALAEKEPPKL  
PGVSLVGRVNAWSCCPFYHQPIYPGPPGALTQGPVPSLGLWRKSPASPGELAHAKDADGPGQKVYRPVVLKPI  
IPTKAMPPIIFNVFGYL PMRKRQLPASFWEEP

rs:XP\_008158157 [XP\_008158157] protein **FAM181A** isoform X2 [Eptesicus  
fuscus]. 129..143

MASDSVDMKLLNFVNLASSDIKAALDKSAPCRRSVDHRKYLQKQLKRFQKYSRLPRGLPGRGAEPPLR  
RGPEDRPGRLPLNPGPDASPHSGGDCKEKALGNPYREECLSRQTLQGNPGAARPGQVPMRKRQLPASFWEEP  
PTHSTYPVALEGLVGPREGPPYECKKHCRGLELFGPEMALIPMSPRALAEKEPPKLPGVSLVGRVNAWSCCPFY  
HQPIYPGPPGALTQGPVPSLGLWRKSPASPGELAHAKDADGPGQKVYRPVVLKPIIPTKAMPPIIFNVFGYL  
PMRKRQLPASFWEEP

rs:XP\_012543242 [XP\_012543242] transcriptional coactivator YAP1 isoform  
X1 [Monomorium pharaonis]. 46..60

MALNQDQVLSKSNPVVRVDQNSESDLQALFDTVLKPDSCRPLQVPLMRNLPDSFFNPPSTGSKSPSI  
SHSRENSADSAFGAAVTGTPNGGSAPNGGASSGSGNGGGGGGGGGGATGTGGGGGGGAGAGSGANANGTANA  
IAVAAAATAAAGLTVSHPRAHSSPASLQQTYASAQQAPQHAPQPHARHHHHQKQRSYDVIAPTVDLGLPLHGWE  
QARTPEGQIYFLNHLTRTTTWEDPRKTAASVAVAVAEVSSEKSNALGPLPDGWEQARTPEGEIYFINHQTRTT  
SWFDPRIHIIPSASHLQRTPANSMTLPLQAWLQOPPQIQQNSLQACQKMRQLQSLQMECERLKLRRQEIIRQA  
FFSSLQQEMMRQSTTDASMDPMLRQSATDAPMDPFLSGIPGAEHARQESADSGLGLGSAYSPLPQTSDDFLNIDEN  
MDGTSEHCSLNDLTKRLYRSHKYINGTTMDTPDISLSENLDVPTDELLPSLQLNEEFSTDILEDVQSLINPNTT  
KPENVTWL PLMRNLPDSFFNPP

rs:XP\_012543243 [XP\_012543243] transcriptional coactivator YAP1 isoform  
X2 [Monomorium pharaonis]. 46..60

MALNQDVDQLSKSNPVVRVDQNSESDLQALFDTVLPKPSKRPLQVPLMRNLPSFFNPPSTGSKSPSI  
SHSRENSADSAFGAAVTGTPNGGSAPNGGASSGSGNGGGGGGGGGGATGTGGGGGGGGAGAGSGANANGTANA  
IAVAAAVAAAAGLTVSHPRAHSSPASLQQTYASAQQAPQHAPQPHARHHHHQKQRSYDVIAPTVDLGLPLPHGWE  
QARTPEGQIYFLNHLTRTTTTWEDPRKTAASVAAVAAAVESKSNALGPLPDGWEQARTPEGEIYFINHQTRTT  
SWFDPRIIPSHLQRTPANSGTMLPQAWQLQOPPGIQQNQLQACQQKMRQLQSLQMECERLKLRRQEIRQAFFSSL  
QQEMMRQSTTDASMDPMLRQSATDAPMDPFLSGIPGAEHARQESADSGLGLGSAYSLPQTSDDFLNIDENMDGTS  
ERHCSLNDLTKRLYRSHKYINGTTMDTPDISLSENLDVPTDELLPSLQLNEEFSTDILEDVQSLINPNTTKPENV  
LTWL PLRMRNLPSFFNPP

rs:XP\_012543245 [XP\_012543245] transcriptional coactivator YAP1 isoform  
X3 [Monomorium pharaonis]. 46..60

MALNQDVDQLSKSNPVVRVDQNSESDLQALFDTVLPKPSKRPLQVPLMRNLPSFFNPPSTGSKSPSI  
SHSRENSADSAFGAAVTGTPNGGSAPNGGASSGSGNGGGGGGGGGGATGTGGGGGGGGAGAGSGANANGTANA  
IAVAAAVAAAAGLTVSHPRAHSSPASLQQTYASAQQAPQHAPQPHARHHHHQKQRSYDVIAPTVDLGLPLPHGWE  
QARTPEGQIYFLNHLTRTTTTWEDPRKTAASVAAVAAAVESKSNALGPLPDGWEQARTPEGEIYFINHQTRTT  
SWFDPRIHIIPASHLQRTPANSGTMLPQAWQLQOPPGIQQNQLQACQQKMRQLQSLQMECERLKLRRQEIRQQ  
EMMRQSTTDASMDPMLRQSATDAPMDPFLSGIPGAEHARQESADSGLGLGSAYSLPQTSDDFLNIDENMDGTSE  
RHC SLNDLTKRLYRSHKYINGTTMDTPDISLSENLDVPTDELLPSLQLNEEFSTDILEDVQSLINPNTTKPENVLT  
WL PLRMRNLPSFFNPP

rs:XP\_028045498 [XP\_028045498] transcriptional coactivator YAP1 isoform  
X4 [Monomorium pharaonis]. 46..60

MALNQDVDQLSKSNPVVRVDQNSESDLQALFDTVLPKPSKRPLQVPLMRNLPSFFNPPSTGSKSPSI  
SHSRENSADSAFGAAVTGTPNGGSAPNGGASSGSGNGGGGGGGGGGATGTGGGGGGGGAGAGSGANANGTANA  
IAVAAAVAAAAGLTVSHPRAHSSPASLQQTYASAQQAPQHAPQPHARHHHHQKQRSYDVIAPTVDLGLPLPHGWE  
QARTPEGQIYFLNHLTRTTTTWEDPRKTAASVAAVAAAVESKSNALGPLPDGWEQARTPEGEIYFINHQTRTT  
SWFDPRIIPSHLQRTPANSGTMLPQAWQLQOPPGIQQNQLQACQQKMRQLQSLQMECERLKLRRQEIRQQEMMRQ  
STTDASMDPMLRQSATDAPMDPFLSGIPGAEHARQESADSGLGLGSAYSLPQTSDDFLNIDENMDGTSE  
RHC SLNDLTKRLYRSHKYINGTTMDTPDISLSENLDVPTDELLPSLQLNEEFSTDILEDVQSLINPNTTKPENVLT  
WL PLRMRNLPSFFNPP

rs:XP\_012543246 [XP\_012543246] transcriptional coactivator YAP1 isoform  
X5 [Monomorium pharaonis]. 46..60

MALNQDVDQLSKSNPVVRVDQNSESDLQALFDTVLPKPSKRPLQVPLMRNLPSFFNPPSTGSKSPSI  
SHSRENSADSAFGAAVTGTPNGGSAPNGGASSGSGNGGGGGGGGGGATGTGGGGGGGGAGAGSGANANGTANA  
IAVAAAVAAAAGLTVSHPRAHSSPASLQQTYASAQQAPQHAPQPHARHHHHQKQRSYDVIAPTVDLGLPLPHGWE  
QARTPEGQIYFLNHLTRTTTTWEDPRKTAASVAAVAAAVESKSNALGPLPDGWEQARTPEGEIYFINHQTRTT  
SWFDPRIHIIPASHLQRTPANSGTMLPQAWQLQOPPGIQQNQLQACQQKMRQLQSLQMECERLKLRRQEIRQA  
FFSSLQEMMRQSTTDASMDPMLRQSATDAPMDPFLSGIPGAEHARQESADSGLGLGSAYSLPQTSDDFLNIDEN  
MDGTS DGT TMDTPDISLSENLDVPTDELLPSLQLNEEFSTDILEDVQSLINPNTTKPENVLTWL  
PLRMRNLPSFFNPP

rs:XP\_012543247 [XP\_012543247] transcriptional coactivator YAP1 isoform  
X6 [Monomorium pharaonis]. 46..60

MALNQDVDQLSKSNPVVRVDQNSESDLQALFDTVLPKPSKRPLQVPLMRNLPSFFNPPSTGSKSPSI  
SHSRENSADSAFGAAVTGTPNGGSAPNGGASSGSGNGGGGGGGGGGATGTGGGGGGGGAGAGSGANANGTANA  
IAVAAAVAAAAGLTVSHPRAHSSPASLQQTYASAQQAPQHAPQPHARHHHHQKQRSYDVIAPTVDLGLPLPHGWE  
QARTPEGQIYFLNHLTRTTTTWEDPRKTAASVAAVAAAVESKSNALGPLPDGWEQARTPEGEIYFINHQTRTT  
SWFDPRIHIIPASHLQRTPANSGTMLPQAWQLQOPPGIQQNQLQACQQKMRQLQSLQMECERLKLRRQEIRQQ  
EMMRQSTTDASMDPMLRQSATDAPMDPFLSGIPGAEHARQESADSGLGLGSAYSLPQTSDDFLNIDENMDGTS  
DGT TMDTPDISLSENLDVPTDELLPSLQLNEEFSTDILEDVQSLINPNTTKPENVLTWL PLRMRNLPSFFNPP

rs:XP\_012543248 [XP\_012543248] transcriptional coactivator YAP1 isoform  
X7 [Monomorium pharaonis]. 46..60

MALNQDVDQLSKSNPVVRVDQNSESDLQALFDTVLPKPSKRPLQVPLMRNLPSFFNPPSTGSKSPSI  
SHSRENSADSAFGAAVTGTPNGGSAPNGGASSGSGNGGGGGGGGGGATGTGGGGGGGGAGAGSGANANGTANA  
IAVAAAVAAAAGLTVSHPRAHSSPASLQQTYASAQQAPQHAPQPHARHHHHQKQRSYDVIAPTVDLGLPLPHGWE  
QARTPEGQIYFLNHLTRTTTTWEDPRKTAASVAAVAAAVESKSNALGPLPDGWEQARTPEGEIYFINHQTRTT  
SWFDPRIIPSHLQRTPANSGTMLPQAWQLQOPPGIQQNQLQACQQKMRQLQSLQMECERLKLRRQEIRQQEMMRQ

STTDASMDPMLRQSATDAPMDPFLSGIPGAEHARQESADSGGLGSGAYSLLPQTSDDFLNIDENMDGTS DGT TMDT  
PDISLSENLDVPTDELLPSLQLNEEFSTDILEDVQSLINPNTTKPENVLTLW PLRMRNLPSDFNPP

rs:XP\_015707744 [XP\_015707744] PREDICTED: transcriptional coactivator  
YAP1 isoform X1 [Coturnix japonica]. 84..98

MDPGQPQPQQPPQAAQPPAPQQAAPQPPGNVSGAPGGAAQQPGAGPPPAGHQIVHVRGDSETDLEALFN  
AVMNPKGANVPHTLPMRLRKLKLPDSFFKPPPEPKAHSRQASTDAGTAGALTPQHVRHSSPASLQLGAVSPGTLTPS  
GVVTGPGAPSSQHLRQSSFEIPDDVPLPPGWEMAKTPSGQRYFLNHIDQTTTWQDPRKAMLSQMNVTAPTSPPVQ  
QNLMNASAGPLPDGWEQAMTQDGEIYYINHKNKTTSWLDPRLDPRFAMNQRISQSAPVKQPPPLAPQSPQGGVMG  
GSSSNQQQQMRLQQLQMEKERLRLKHQELLRQVRPQAMRNPSTANS PKHQELALRSQLPTMEQDGGSQNPVSSPG  
MSQELRTMTTNSSDPFLNSGTYHSRDESTDSGLSMSSYSVPRTPDDFLNSVDEMDTGDSISQSNIPSHQNRFPDY  
LEAIPGTNVDLGTLEGDGMNIEGEEELMPSLQEQALSSDILNDMESVLAATKLDKESFLTWL  
PMRLRKLKLPDSFFKPP

rs:XP\_015707745 [XP\_015707745] PREDICTED: transcriptional coactivator  
YAP1 isoform X2 [Coturnix japonica]. 84..98

MDPGQPQPQQPPQAAQPPAPQQAAPQPPGNVSGAPGGAAQQPGAGPPPAGHQIVHVRGDSETDLEALFN  
AVMNPKGANVPHTLPMRLRKLKLPDSFFKPPPEPKAHSRQASTDAGTAGALTPQHVRHSSPASLQLGAVSPGTLTPS  
GVVTGPGAPSSQHLRQSSFEIPDDVPLPPGWEMAKTPSGQRYFLNHIDQTTTWQDPRKAMLSQMNVTAPTSPPVQ  
QNLMNASAGPLPDGWEQAMTQDGEIYYINHKNKTTSWLDPRLDPRFAMNQRISQSAPVKQPPPLAPQSPQGGVMG  
GSSSNQQQQMRLQQLQMEKERLRLKHQELLRQVRPQELALRSQLPTMEQDGGSQNPVSSPGMSQELRTMTTNSSD  
LRTMTTNSSDPFLNSGTYHSRDESTDSGLSMSSYSVPRTPDDFLNSVDEMDTGDSISQSNIPSHQNRFPDYLEAI  
PGTNVDLGTLEGDGMNIEGEEELMPSLQEQALSSDILNDMESVLAATKLDKESFLTWL PMRLRKLKLPDSFFKPP

rs:XP\_015707746 [XP\_015707746] PREDICTED: transcriptional coactivator  
YAP1 isoform X3 [Coturnix japonica]. 84..98

MDPGQPQPQQPPQAAQPPAPQQAAPQPPGNVSGAPGGAAQQPGAGPPPAGHQIVHVRGDSETDLEALFN  
AVMNPKGANVPHTLPMRLRKLKLPDSFFKPPPEPKAHSRQASTDAGTAGALTPQHVRHSSPASLQLGAVSPGTLTPS  
GVVTGPGAPSSQHLRQSSFEIPDDVPLPPGWEMAKTPSGQRYFLNHIDQTTTWQDPRKAMLSQMNVTAPTSPPVQ  
QNLMNASAGPLPDGWEQAMTQDGEIYYINHKNKTTSWLDPRLDPRFAMNQRISQSAPVKQPPPLAPQSPQGGVMG  
GSSSNQQQQMRLQQLQMEKERLRLKHQELLRQVRPQELALRSQLPTMEQDGGSQNPVSSPGMSQELRTMTTNSSD  
PFLNSGTYHSRDESTDSGLSMSSYSVPRTPDDFLNSVDEMDTGDSISQSNIPSHQNRFPDYLEAIPGTNVDLGTLE  
EGDGMNIEGEEELMPSLQEQALSSDILNDMESVLAATKLDKESFLTWL PMRLRKLKLPDSFFKPP

rs:XP\_015707747 [XP\_015707747] PREDICTED: transcriptional coactivator  
YAP1 isoform X4 [Coturnix japonica]. 84..98

MDPGQPQPQQPPQAAQPPAPQQAAPQPPGNVSGAPGGAAQQPGAGPPPAGHQIVHVRGDSETDLEALFN  
AVMNPKGANVPHTLPMRLRKLKLPDSFFKPPPEPKAHSRQASTDAGTAGALTPQHVRHSSPASLQLGAVSPGTLTPS  
GVVTGPGAPSSQHLRQSSFEIPDDVPLPPGWEMAKTPSGQRYFLNHIDQTTTWQDPRKAMLSQMNVTAPTSPPVQ  
QNLMNASAGPLPDGWEQAMTQDGEIYYINHKNKTTSWLDPRLDPRFAMNQRISQSAPVKQPPPLAPQSPQGGVMG  
GSSSNQQQQMRLQQLQMEKERLRLKHQELLRQELALRSQLPTMEQDGGSQNPVSSPGMSQELRTMTTNSSDPFLN  
SGTYHSRDESTDSGLSMSSYSVPRTPDDFLNSVDEMDTGDSISQSNIPSHQNRFPDYLEAIPGTNVDLGTLEGDG  
MNIEGEEELMPSLQEQALSSDILNDMESVLAATKLDKESFLTWL PMRLRKLKLPDSFFKPP

rs:XP\_015707879 [XP\_015707879] PREDICTED: LOW QUALITY PROTEIN: protein  
**FAM181B** [Coturnix japonica]. 215..229

MPFRQEAGMPVSGPALVPPPLHPAAFSPTPASSSSRVPLQPCGARRRGAPPPAMAVPAALLSPHLLLSF  
CFPAGGLLGYADLEKGYDGGGGGGGGGEAGDFKEATRDLDSFIDSASSNIKLALDKPVKSKRKVNHRKYLQKQIK  
RCTGIIAPPSAAPPTSACPKPPPPRRREGSQAGSSLSQSRSLAALFGSLQPGRGSTGSDGGAAGGGPRKVPLRDR  
NLPPSFFTEPGAKETEKGGGPEAAEFFELLGPEYGALLPEHAAPPQDAFPAARPPAELGLEHGLYEAPLPAAPH  
PLLGGLLYPEPPWSPGPCSPAKKAAADALRPLYPEPAAGGDAFGSFFPECPLPPRRRCITSTAAASTGRPTPGCR  
AGPAPGRGHLRVGXKXKGEAERGCGRDRPGGEESWARPHREGAGMAEHQKRPQLTLEGNRHRGRLRAPLSAXGDA  
ALLRSN PLRDRNLPPSFFTEP

rs:XP\_016154463 [XP\_016154463] PREDICTED: protein **FAM181A** [Ficedula  
albicollis].>tr:U3JII2\_FICAL [U3JII2] SubName: Full=Family with sequence  
similarity 181 member A {ECO:0000313|Ensembl:ENSFALP00000002586};  
127..141

MASDSEVKTLNLFVNLASSDIKAALDKSAPCRRSVDHRKYLQKQLKRFSQKYSRIPRCHPSKAPECGWR



RAAEERARGPQPEAPEPGPHGGAAAEKLLQTAEAEESLTGERLLQEOKPEAARPDQVPMRKRQLPASFWEEP  
QSLTGRAFPAGPEGLQAPRDAPPYEGKKSRRSPDAAGPESPPDPAAHGGEKEPAGALSGRVGAWTCCPFP  
VFQPPGALPPSPFALGLWRKSAATLPAEVPHFGKEADGPGQKLYRPMVLKPIPTKPAIPPIFNVFGYL  
PMRKRQLPASFWEEP

rs:XP\_015670195 [XP\_015670195] PREDICTED: transcriptional coactivator  
YAP1 [Protobothrops mucrosquamatus]. 13..27

MNPKGANVPHLPMRLRKLKLPDSFFKPPPEPKAHSRQASTDAGTAGALTPQHVRHSSPALLGTVSPGALT  
PSGVVPGGTPSQHLRQSSFEIPDDVPLPPGWEMAKTPSGQRYFLNHIDQTTTWQDPRKTLSSQMNVTAPTSPLQ  
QNIMNSATGPLPEGWEQAMTQDGEIYYINHNKNTTSWLDPRLDPRFAMNQRISQSAPVKQPPPLAPQSPGGVVG  
GGNSSQQQIRLQQLQMEKERLRLKHQELLRQELALRSQLPMSQDGTQNRVSSPGMSQELRMTTNSSDPFLNS  
GTYHSRDESTDSGLSMSSYSIPRTPDDFLNSVDEMDTGDITINQSTIPSHQNRFPDYLEAIPGTNVLDLGTLEGDAM  
NIEGEEMLPMSLQEQALSSDILNDMESVLAATKLDKESFLTWL PMRLRKLKLPDSFFKPP

rs:XP\_015671185 [XP\_015671185] PREDICTED: protein **FAM181A** [Protobothrops  
mucrosquamatus]. 137..151

MASTDSEVKTLNLFVNLAASSDIKAAALDKSAPCRRSVDHRKYLQKQLKRFSSQKYSRLPRCHHHHLQFQLP  
PARERRPPEGRARGLSPESSVGRGHAASGAAGKDKASQAPERLGGEEEQQQQPGASEAGARPDQVPMRKRQLP  
ASFWEEPAPAGSPGVYHGPQASPGLYPPPLPAALPPAAPFSALGLWRKDAPSPTEGEAFQCPGQKVYRVPVWPK  
IPTKPAAPPLIFSVFSYL PMRKRQLPASFWEEP

rs:XP\_015682677 [XP\_015682677] PREDICTED: protein **FAM181B** [Protobothrops  
mucrosquamatus]. 265..279

MAVQAAPLPPPHHHPFVFPFGFPADFGALEKSYGGCEGGGGVGGGGGALLLLEGVGGAHGGGVVGGVA  
SCTDPGDFREATRELLSFIDSASSNIKLALDKPGKSKRVNHRKYLQKQIKRCTGLIGGASANPEAAAAVASLAA  
AAPGSVPGSANKAASLTAPSSGAAASSSSSCRPPAKRESHALQSKSLAALFDALRSPGLERKGSPTAVASAAA  
AAAAAATAAAPAAGLSDVGGKEAGSSPVAVAAAAAGACKKVLNRNLPVVSFFTEPAPPSRPPNPAGLEEA  
VPSVAEELFDLLAAPDYRGLLQEAEEPAVFPFPALQVAAELPLEPPLYEPLPSMAPLLYAEPLRPLPALYAA  
VAASDPAAPFFADCPLPPPAPVYDYGYNRGPVYPSL PLNRNLPVVSFFTEP

rs:XP\_015761069 [XP\_015761069] PREDICTED: uncharacterized protein  
LOC107340231 [Acropora digitifera]. 147..161

MDESKMNLIQDISSTASSLLNFVSTATSNLKFALQKPVKPKRRVNHRKYLQKQKGRGVTTLTGSCANS  
CLIQUEVNERNISLKSAGKLSALEKRAEDGKAMEENGVVRKRNERENKEKCGNSIIKDPKEQMNSLSNLPSA  
QSPLRKRKLPESFWSEPTKQSVQSTRYSAINLTTNDFORSELEILDWLRPELDEFIERWSEESDHVSNHSSRPSS  
LCDSTSTVDPYSPYSEESDNTAAMDEFFEQRVFSLPLRVGNNGPGVRNFVLEHEIIKNCNIEQSYGGQGT  
MNNPLNFINDHFGLSGPSWNTQYQAQENFIDGAYIV PLRKRKLPESFWSEP

rs:XP\_015771341 [XP\_015771341] PREDICTED: uncharacterized protein  
LOC107349675 [Acropora digitifera]. 102..116

MDPLRKRQVQDLSLRSRSPSPCGPSSPQSPPLSIRGKSLSLNRVNPPLAPIREAKELSKRGRKQRL  
LSQAGNLTLLKRETSPDFSRLEARKPKRGPLPMRMRALPQSFQWQEPKDIQNSSMSTEGSLQTLPLFHANNTS  
DDVSKLRPVTPEEKHKPRPPKEPKLVISSPQEQLLKLFETVEEDKTKKFVIKGRPRRAQSDLTALSLPKLEED  
PCMMTSLAEKMFPLSLEHKQSAGANTSLSCVSVHDGDKSVQLPSLNVEQNYSQLSEIVAHF  
PMRMRALPQSFQWQEP

rs:XP\_016092458 [XP\_016092458] PREDICTED: transcriptional coactivator  
YAP1 [Sinocyclocheilus grahami]. 45..59

MDPSQHNPPAGHQIVHVRGDSETDLEALFNAVMPKNTITPPSVPMRMRKLPDSFFKPPPEPKSHSRQAS  
TDAGTAGTLTPQHVRHSSPASLQLGAVSPGTLSSMVPANAPPQHLRQSSYEIPDDVPLPPGWEMAKTPSGQRYF  
LNHNDQTTTWQDPRKALLQMNQAAPASPVVQQQNMNPASGPLPDGWEQAITSEGEIYYINHNKNTTSWLDPR  
DPRYAMNQQRISQSAPVKQGSQLPSSPQSGVLGGNNQIRLQQIQMEKERLRIKQELLRQRPQGGVSVQFTYVHSF  
DLSKQLWPGVFLCSGTYHSRDESTDSGLSMSSYSVPRTPDDFLNSVDEMETGDRLGPSMATQPSRFPDYLD  
AIP GTDVDLGTLEGESMVEGEELMPSLQEQALSSDILNDMESVLAATKIDKENFLTWL PMRMRKLPDSFFKPP

rs:XP\_016099741 [XP\_016099741] PREDICTED: transcriptional coactivator  
YAP1-like [Sinocyclocheilus grahami]. 45..59

MDPSQHNPPAGHQIVHVRGDSETDLEALFNAVMPKNAISPPSVPMRMRKLPDSFFKPPPEPKSHSRQAS  
TDAGTAGTLTPQHVRHSSPASLQLGAVSPGTLSSMVPANAPPQHLRQSSYEIPDDVPLPPGWEMAKTPSGQRYF

LNHNDQTTTWQDPRKALLQMNQAAPASPVVQQQNIMNPASGPVDPGWQAITSEGEIYYINHKNKTTSWLDPRL  
DPRYAPVIEVDELLTFGGTFSHQLQKHFYDYEPAAANFPECSSEARLPVALQPTERSAGWKQPDQAAADPDGERET  
EDQTRAPSPETPGARPEKPAADQHGAGWRHRSKPCVLTRHGTRRP PMRMRKLPDSFFKPP

rs:XP\_016101694 [XP\_016101694] PREDICTED: protein **FAM181B**-like  
[*Sinocyclocheilus grahami*]. 15..29

MSCQVVRGERAKKPLRHRNLPPSFFTEPANSSRVSTSTSGMSLKDLEKRGTPDAAEFLELLGPDYSTMVS  
EQDLFHTAPIRIQQEVTVGPEPYDSSHFFVSGGFLYTEPWGTCSSNPKKSGDMRTVPVQPNLYTHTDLSGSVPVEQ  
SSPCALTFNSFFTDCSAPSVSYDLVNGYNRGSFSSL PLRHRNLPPSFFTEP

rs:XP\_016117131 [XP\_016117131] PREDICTED: protein **FAM181A**  
[*Sinocyclocheilus grahami*]. 111..125

MASDSEVKTLNLFVNLAASSDIKAALDRSAPCRRSVDHRKYLQKQLKRFSHRYAKIPRCHSHRNGDSTP  
AKRSEDKAPPGPGSGSGGREERLNAEDGARSQGQGGQAPMPMRKRQLPASFWKEPQASSGSRERLERFLHTAHV  
RPPAGNERSTAGFEDLNANPLLSGGAACACSCCSLPIRFLPHADAPLSSRAHVVIKPIPTKPSSSSSSSSSSS  
SVFSVFGFI PMRKRQLPASFWKEP

rs:XP\_018900896 [XP\_018900896] PREDICTED: transcriptional coactivator  
YAP1-A-like [*Bemisia tabaci*]. 43..57

MALNQDDSKNNLMVRMDQNSETELQKLFDTVLKPDAKIPLQLPLRMRKLPSPFFNPPSTGSKSPSVSSI  
SHSRENSADSAFGTTTTITSTSLQVNHPRAHSSPASLQOQTYASAQQAQKQHQHNLHLKQRSYDVTNQTVDL  
GPLPPGWEQAKTSEGQIYFLNHITRSTTWEDPRKALAAQVQSVQNLAAQCNAAGGGNQTSGSDQQLSSSTT  
SVTSPGGVGKSPGPLSPATSPGSLGPLPEGWEQALTPEGEQYFINHQTRTTSWFDPRIPQHMQRQLSAGAILPSG  
WPPTISSTTNSQASQQLRLQSLQLEREKLRQREIFRQEQEFLRPNSTADPFLSGLTDHSRQESADSLGMGN  
NYSLPHTPEDFLNTVDDNMDGVSEGGTLGSPDMSTLDSQEMSSLTDTIDLTEDLVPSLQLGEELSSDILDDVQSL  
INPTSKADNVLTWL PLRMRKLPSPFFNPP

rs:XP\_018917904 [XP\_018917904] PREDICTED: transcriptional coactivator  
yorkie-like [*Bemisia tabaci*]. 43..57

MALNQDDSKNNLMVRMDQNSETELQKLFDTVLKPDAKIPLQLPLRMRKLPSPFFNPPSTGSKSPSVSSI  
SHSRENSADSAFGTTTTITSTSLQVNHPRAHSSPASLQOQTYASAQQAQKQHQHNLHLKQRSYDVTNQTVDL  
GPLPPGWEQAKTSEGQIYFLK PLRMRKLPSPFFNPP

rs:XP\_010607503 [XP\_010607503] PREDICTED: protein **FAM181A** [*Fukomys*  
*damarensis*]. 129..143

MASDTDVKMLNLFVNLAASSDIKAALDKSAPCRRSVDHRKYLQKQLKRFSQKYSRLPRGLPGRAAEPLK  
RGPEDRPGRLLLLHPGPDSPGGGGGCKEKALGSPFGEELSKQILQGGGLGAAKPGQVPMRKRQLPASFWEEPR  
PTHSYPMGLEGLGPREGSPYESKKNCKGLESSVPEAAPGPMSPRVLANKEPLKMPGVSLVGCVDAWSCCPFQYH  
GQPIYSPPGALPPSPLPSLGLWRKSPALPAELAHFCKHVDSPGQKVYRPMVLKPIPTKPAVPPPIFNVSYL  
PMRKRQLPASFWEEP

rs:XP\_007556477 [XP\_007556477] PREDICTED: transcriptional coactivator  
YAP1-like isoform X4 [*Poecilia formosa*]. 46..60

MDAHRGAPPAGQVHVVRGDSNTELEALFNAVMPGKAARQTQSVPMRMRKFPDSFFKPPPEPRGHSRQA  
SSDGGVCGSLAPHHVRAHSSPASLPINSVNVAATPVI PDDVPLPEDWEMAKTPTGQRYFINHAQRSTTWQDPRLS  
QLQSAQAQHQIACPTPSHAHSFSNPAPTTQPKNIIPETAPKVNPAAGLPLAIQQRLEKLRKHPVPPQFAPQVQEAG  
GSNQMPGGMDHRSQAQMLVPSVDIRIRALNQESNLNGAHSRNESTDSGLSVSSLSRSDHMLSSVDHMDTGDSSSE  
PSPMGLQESMPVLPINEELMSGIPDSLTSMDLMDTDLVLSGPHMDRDSLLTTLPLRMRKFPDSFFKPP

rs:XP\_019289197 [XP\_019289197] PREDICTED: transcriptional coactivator  
YAP1 [*Panthera pardus*]. 154..168

MGLLTQIPLLEESGVRSSGVEGVRSLPSGLPGPHQFLRAPAADPGRAGAQRKEGPRGGADAPLGRAAL  
STLVLASAASFCLSRAQPPGEGREGGRKEGTPGAERAAGEGSPRRPSRAQAPAGARAGGAGXETDLEALFNAVMP  
KTANVPQTVPMRLRKLKLPDSFFKPPPEPKSHSRQASTDAGSAGALAPQHVRHSSPASLQLGAVSPGTLTPTGVVSG  
PAATPAAQHLRQSSFEIPDDVPLPAGWEMAKTSSGQRYFLNHIDQTTTWQDPRKAMLSQMSVTAPTSPPVQNNM  
NSASGPLPDGWQAMTQDGEIYYINHKNKTTSWLDPRLDPRFGKAVNQRVGQSAPAKQPPPLAPQSPGGVLGSG  
GSNQOMRLQQLQMEKERLRLKQELLRQAMRNINPSSANSKPCQELALRSQPLTDQEGGTQNPVPSPGMSQELR  
TMTTSSDPFLNSGTYHSRDESTDSGLSMSSYSVPRTPDDFLNSVDEMMDTGTINQSTLPSQQNRFPDYLEAIPG  
TNVDLGTLEGDMNIEGEEMLPSLQEQALSSDILNDMESVLAATKLDKESFLTWL PMRLRKLKLPDSFFKPP

rs:XP\_001370835 [XP\_001370835] PREDICTED: protein **FAM181A** isoform X1 [Monodelphis domestica].>tr:F7BYB2\_MONDO [F7BYB2] SubName: Full=Family with sequence similarity 181 member A {ECO:0000313|Ensembl:ENSMODP00000032880}; 160..174

MENWGVGENDWCTYCLPFVHLLSCRPGNSSSSSWKSPGGVPREMASDSEVKMLLNFNVLASSDIKAALDK SAPCRRSVDHRKYLQKQLKRFSQKYSRLPRCYPNRSGESHSKRGPEDSHCRTPSNGSTKGPNGRMEENFPQVQ ALQEQIPEASRPDQVPMRKRQLPASFWEEPRAQSYSGGLDGLSGHREVPAYEGKKSKKRPETLGSETAPVPTSP RAEKESPKVPSASLMGRMSAWSCCPFYHGQPIYQSPGGLPQSPVPSLGLWRKSPASPGEMGHFCKEPPGSPSQKV YRPVVLKPIPTKPGVPPPIFNVFGYI PMRKRQLPASFWEEP

rs:XP\_007472634 [XP\_007472634] PREDICTED: protein **FAM181A** isoform X2 [Monodelphis domestica].>rs:XP\_007472635 [XP\_007472635] PREDICTED: protein **FAM181A** isoform X2 [Monodelphis domestica].>rs:XP\_007472636 [XP\_007472636] PREDICTED: protein **FAM181A** isoform X2 [Monodelphis domestica]. 118..132

MASDSEVKMLLNFNVLASSDIKAALDKSAPCRRSVDHRKYLQKQLKRFSQKYSRLPRCYPNRSGESHSK RGPEDSHCRTPSNGSTKGPNGRMEENFPQVQALQEQIPEASRPDQVPMRKRQLPASFWEEPRAQSYSGGLD LSGHREVPAYEGKKSKKRPETLGSETAPVPTSPRAEKESPKVPSASLMGRMSAWSCCPFYHGQPIYQSPGGLPQ SPVPSLGLWRKSPASPGEMGHFCKEPPGSPSQKVYRPVVLKPIPTKPGVPPPIFNVFGYI PMRKRQLPASFWEEP

rs:XP\_007495026 [XP\_007495026] PREDICTED: transcriptional coactivator YAP1 isoform X1 [Monodelphis domestica]. 89..103

MDPGQQPPQPPSQGQGGQPPSQGQGGQPPTGPGQPAPPGAPGSQAAPPPPPAGHQIVHVRGDSETDL EALFNAVMPNPKTANVPQTVPMLRKLKLPDSFFKQPEPKSHSRQASTDAGTAGALTPQHVRHSSPASLQLGAVSPG TLPSPGVVSGPGAAPTQHLRQSSFEIPDDVPLPAGWEMAKTSSGQRYFLNHIDQTTTWQDPRKALLSQMNV TAP TSPPVQQNIMNSASGPLPDGWEQAMTQDGEIYYINHKNKTTSWLDPRLDPRFGKAMNQRISQSAPVKQPPPLAPQ SPQGGVLGGGSSNQQQQIRLQQLQLEKERLRLKHQELLRQVRPQALRNVPSTANS PKRQEIAIRSQIPTVEQDGI QNPNVSSPGMNQELRMTTNSDPFLNSGTYHSRDESTDSGLSMSSYSVPRTPD DFLNSVDEMDTGDSISQSNIP SQQNRFPDYLEAIPGTNVDLGTLEGDGMNIEGEEMLPSLQEQALSSDILNDMESVLAATKLDKESFLTWL PMRLRKLKLPDSFFKQP

rs:XP\_007495027 [XP\_007495027] PREDICTED: transcriptional coactivator YAP1 isoform X2 [Monodelphis domestica]. 89..103

MDPGQQPPQPPSQGQGGQPPSQGQGGQPPTGPGQPAPPGAPGSQAAPPPPPAGHQIVHVRGDSETDL EALFNAVMPNPKTANVPQTVPMLRKLKLPDSFFKQPEPKSHSRQASTDAGTAGALTPQHVRHSSPASLQLGAVSPG TLPSPGVVSGPGAAPTQHLRQSSFEIPDDVPLPAGWEMAKTSSGQRYFLNHIDQTTTWQDPRKALLSQMNV TAP TSPPVQQNIMNSASGPLPDGWEQAMTQDGEIYYINHKNKTTSWLDPRLDPRFAMNQRISQSAPVKQPPPLAPQSP QGGVLGGGSSNQQQQIRLQQLQLEKERLRLKHQELLRQVRPQALRNVPSTANS PKRQEIAIRSQIPTVEQDGGI QNPNVSSPGMNQELRMTTNSDPFLNSGTYHSRDESTDSGLSMSSYSVPRTPD DFLNSVDEMDTGDSISQSNIP SQQNRFPDYLEAIPGTNVDLGTLEGDGMNIEGEEMLPSLQEQALSSDILNDMESVLAATKLDKESFLTWL PMRLRKLKLPDSFFKQP

rs:XP\_007495028 [XP\_007495028] PREDICTED: transcriptional coactivator YAP1 isoform X3 [Monodelphis domestica]. 89..103

MDPGQQPPQPPSQGQGGQPPSQGQGGQPPTGPGQPAPPGAPGSQAAPPPPPAGHQIVHVRGDSETDL EALFNAVMPNPKTANVPQTVPMLRKLKLPDSFFKQPEPKSHSRQASTDAGTAGALTPQHVRHSSPASLQLGAVSPG TLPSPGVVSGPGAAPTQHLRQSSFEIPDDVPLPAGWEMAKTSSGQRYFLNHIDQTTTWQDPRKALLSQMNV TAP TSPPVQQNIMNSASGPLPDGWEQAMTQDGEIYYINHKNKTTSWLDPRLDPRFGKAMNQRISQSAPVKQPPPLAPQ SPQGGVLGGGSSNQQQQIRLQQLQLEKERLRLKHQELLRQALRNVPSTANS PKRQEIAIRSQIPTVEQDGGI QNPNVSSPGMNQELRMTTNSDPFLNSGTYHSRDESTDSGLSMSSYSVPRTPD DFLNSVDEMDTGDSISQSNIP SQQNRFPDYLEAIPGTNVDLGTLEGDGMNIEGEEMLPSLQEQALSSDILNDMESVLAATKLDKESFLTWL PMRLRKLKLPDSFFKQP

rs:XP\_003341352 [XP\_003341352] PREDICTED: transcriptional coactivator YAP1 isoform X4 [Monodelphis domestica]. 89..103

MDPGQQPPQPPSQGQGGQPPSQGQGGQPPTGPGQPAPPGAPGSQAAPPPPPAGHQIVHVRGDSETDL EALFNAVMPNPKTANVPQTVPMLRKLKLPDSFFKQPEPKSHSRQASTDAGTAGALTPQHVRHSSPASLQLGAVSPG TLPSPGVVSGPGAAPTQHLRQSSFEIPDDVPLPAGWEMAKTSSGQRYFLNHIDQTTTWQDPRKALLSQMNV TAP TSPPVQQNIMNSASGPLPDGWEQAMTQDGEIYYINHKNKTTSWLDPRLDPRFAMNQRISQSAPVKQPPPLAPQSP

QGGVLGGGSSNQQQQIRLQQLQLEKERLRLKHQELLRQALRNVPSTANS PKRQEIAIRSQIPTVEQDGGIQNPV  
SSPGMNQELRTMTTNSDPFLNSGTYHSRDESTDSGLSMSSYSVPRTPDDFLNSVDEM DTGDSISQSNIP SQQNR  
FPDYLEAIPGTNVDLGTLEGDGMNIEGEELMPSLQEQALSSDILNDMESVLAATKLDKESFLTWL  
PMRLRKL PDSFFKQP

rs:XP\_007495029 [XP\_007495029] PREDICTED: transcriptional coactivator  
YAP1 isoform X5 [Monodelphis domestica]. 89..103

MDPGQQPPQPPSQGQGQPPSQPPQGGQGGPPTGPGQPAPPGAPGSQAAPPPPPAGHQIVHVRGDSETDL  
EALFNAVMPNPKTANVPQTVPMLRKL PDSFFKQPEPKSHSRQASTDAGTAGALTPQH VRAHSSPASLQLGAVSPG  
TLSPSGVVS GPGAAPTGHRLRQSSFEIPDDVPLPAGWEMAKTSSGQRYFLNHIDQTTTWQDPRKALLSQMNV TAP  
TSPPVQQNIMNSASGPLPDGWEQAMTQDGEIYYINHKNKTT SWLDPRLDPRFGKAMNQRISQSAPVKQPPPLAPQ  
SPQGGVLGGGSSNQQQQIRLQQLQLEKERLRLKHQELLRQVRPQEIAIRSQIPTVEQDGGIQNPVSSPGMNQELR  
TMTTNSDPFLNSGTYHSRDESTDSGLSMSSYSVPRTPDDFLNSVDEM DTGDSISQSNIP SQQNRFPDYLEAIPG  
TNVDLGTLEGDGMNIEGEELMPSLQEQALSSDILNDMESVLAATKLDKESFLTWL PMRLRKL PDSFFKQP

rs:XP\_007495030 [XP\_007495030] PREDICTED: transcriptional coactivator  
YAP1 isoform X6 [Monodelphis domestica]. 89..103

MDPGQQPPQPPSQGQGQPPSQPPQGGQGGPPTGPGQPAPPGAPGSQAAPPPPPAGHQIVHVRGDSETDL  
EALFNAVMPNPKTANVPQTVPMLRKL PDSFFKQPEPKSHSRQASTDAGTAGALTPQH VRAHSSPASLQLGAVSPG  
TLSPSGVVS GPGAAPTGHRLRQSSFEIPDDVPLPAGWEMAKTSSGQRYFLNHIDQTTTWQDPRKALLSQMNV TAP  
TSPPVQQNIMNSASGPLPDGWEQAMTQDGEIYYINHKNKTT SWLDPRLDPRFAMNQRISQSAPVKQPPPLAPQSP  
QGGVLGGGSSNQQQQIRLQQLQLEKERLRLKHQELLRQVRPQEIAIRSQIPTVEQDGGIQNPVSSPGMNQELRTM  
TTNSDPFLNSGTYHSRDESTDSGLSMSSYSVPRTPDDFLNSVDEM DTGDSISQSNIP SQQNRFPDYLEAIPGTN  
VDLGTLEGDGMNIEGEELMPSLQEQALSSDILNDMESVLAATKLDKESFLTWL PMRLRKL PDSFFKQP

rs:XP\_007495031 [XP\_007495031] PREDICTED: transcriptional coactivator  
YAP1 isoform X7 [Monodelphis domestica]. 89..103

MDPGQQPPQPPSQGQGQPPSQPPQGGQGGPPTGPGQPAPPGAPGSQAAPPPPPAGHQIVHVRGDSETDL  
EALFNAVMPNPKTANVPQTVPMLRKL PDSFFKQPEPKSHSRQASTDAGTAGALTPQH VRAHSSPASLQLGAVSPG  
TLSPSGVVS GPGAAPTGHRLRQSSFEIPDDVPLPAGWEMAKTSSGQRYFLNHIDQTTTWQDPRKALLSQMNV TAP  
TSPPVQQNIMNSASGPLPDGWEQAMTQDGEIYYINHKNKTT SWLDPRLDPRFGKAMNQRISQSAPVKQPPPLAPQ  
SPQGGVLGGGSSNQQQQIRLQQLQLEKERLRLKHQELLRQEIAIRSQIPTVEQDGGIQNPVSSPGMNQELRTMTT  
NSDPFLNSGTYHSRDESTDSGLSMSSYSVPRTPDDFLNSVDEM DTGDSISQSNIP SQQNRFPDYLEAIPGTNVD  
LGTLEGDGMNIEGEELMPSLQEQALSSDILNDMESVLAATKLDKESFLTWL PMRLRKL PDSFFKQP

rs:XP\_003341353 [XP\_003341353] PREDICTED: transcriptional coactivator  
YAP1 isoform X8 [Monodelphis domestica]. 89..103

MDPGQQPPQPPSQGQGQPPSQPPQGGQGGPPTGPGQPAPPGAPGSQAAPPPPPAGHQIVHVRGDSETDL  
EALFNAVMPNPKTANVPQTVPMLRKL PDSFFKQPEPKSHSRQASTDAGTAGALTPQH VRAHSSPASLQLGAVSPG  
TLSPSGVVS GPGAAPTGHRLRQSSFEIPDDVPLPAGWEMAKTSSGQRYFLNHIDQTTTWQDPRKALLSQMNV TAP  
TSPPVQQNIMNSASGPLPDGWEQAMTQDGEIYYINHKNKTT SWLDPRLDPRFAMNQRISQSAPVKQPPPLAPQSP  
QGGVLGGGSSNQQQQIRLQQLQLEKERLRLKHQELLRQEIAIRSQIPTVEQDGGIQNPVSSPGMNQELRTMTTNS  
SDPFLNSGTYHSRDESTDSGLSMSSYSVPRTPDDFLNSVDEM DTGDSISQSNIP SQQNRFPDYLEAIPGTNVDL  
GTLEGDGMNIEGEELMPSLQEQALSSDILNDMESVLAATKLDKESFLTWL PMRLRKL PDSFFKQP

rs:XP\_016289376 [XP\_016289376] PREDICTED: transcriptional coactivator  
YAP1 isoform X9 [Monodelphis domestica]. 89..103

MDPGQQPPQPPSQGQGQPPSQPPQGGQGGPPTGPGQPAPPGAPGSQAAPPPPPAGHQIVHVRGDSETDL  
EALFNAVMPNPKTANVPQTVPMLRKL PDSFFKQPEPKSHSRQASTDAGTAGALTPQH VRAHSSPASLQLGAVSPG  
TLSPSGVVS GPGAAPTGHRLRQSSFEIPDDVPLPAGWEMAKTSSGQRYFLNHIDQTTTWQDPRKALLSQMNV TAP  
TSPPVQQNIMNSASAMNQRISQSAPVKQPPPLAPQSPQGGVLGGGSSNQQQQIRLQQLQLEKERLRLKHQELLRQ  
VRPQALRNVPSTANS PKRQEIAIRSQIPTVEQDGGIQNPVSSPGMNQELRTMTTNSDPFLNSGTYHSRDEST  
SGLSMSSYSVPRTPDDFLNSVDEM DTGDSISQSNIP SQQNRFPDYLEAIPGTNVDLGTLEGDGMNIEGEELMPSL  
QEQALSSDILNDMESVLAATKLDKESFLTWL PMRLRKL PDSFFKQP

rs:XP\_016289377 [XP\_016289377] PREDICTED: transcriptional coactivator  
YAP1 isoform X10 [Monodelphis domestica]. 89..103

MDPGQQPPQPPSQGQGQPPSQPPQGGQGGPPTGPGQPAPPGAPGSQAAPPPPPAGHQIVHVRGDSETDL  
EALFNAVMPNPKTANVPQTVPMLRKL PDSFFKQPEPKSHSRQASTDAGTAGALTPQH VRAHSSPASLQLGAVSPG

TLSPSGVVS GPGAAPTQHLRQSSFEIPDDVPLPAGWEMAKTSSGQRYFLNHIDQTTTWDPRKALLSQMNV TAP  
TSPPVQQNIMNSASAMNQRI SQSAPVKQPPPLAPQSPQGGV LGGSSNQQQQIRLQQLQLEKERLRLKHQELLRQ  
ALRNVNPNSTANS PKRQEIAIRSQIPTVEQDGGIQNPVSSPGMNQELRTMTTNSSDPFLNSGTYHSRDESTDSGLS  
MSSYSVPRTPDDFLNSVDEM DTGDSISQSNIP SQQRFPDYLEAIPGTNVDLGTLEG DGMNIEGEE LMPSLQEAL  
SSDILNDMESVLAATKLDKESFLTWL PMRLRKL PDSFFKQP

rs:XP\_016289378 [XP\_016289378] PREDICTED: transcriptional coactivator  
YAP1 isoform X11 [Monodelphis domestica]. 89..103

MDPGQQPPQPPSQGGQPPSQPPQGGQGGPPTGPGQPAPPGAPGSQAAPPPPPAGHQIVHVRGDSETDL  
EALFNAVMPKNTANVPQTVPMRLRKL PDSFFKQPEPKSHSRQASTDAGTAGALTPQH VRAHSSPASLQLGAVSPG  
TLSPSGVVS GPGAAPTQHLRQSSFEIPDDVPLPAGWEMAKTSSGQRYFLNHIDQTTTWDPRKALLSQMNV TAP  
TSPPVQQNIMNSASAMNQRI SQSAPVKQPPPLAPQSPQGGV LGGSSNQQQQIRLQQLQLEKERLRLKHQELLRQ  
VRPQEIAIRSQIPTVEQDGGIQNPVSSPGMNQELRTMTTNSSDPFLNSGTYHSRDESTDSGLSMSSYSVPRTPDD  
FLNSVDEM DTGDSISQSNIP SQQRFPDYLEAIPGTNVDLGTLEG DGMNIEGEE LMPSLQEALSSDILNDMESV L  
AATKLDKESFLTWL PMRLRKL PDSFFKQP

rs:XP\_016289379 [XP\_016289379] PREDICTED: transcriptional coactivator  
YAP1 isoform X12 [Monodelphis domestica]. 89..103

MDPGQQPPQPPSQGGQPPSQPPQGGQGGPPTGPGQPAPPGAPGSQAAPPPPPAGHQIVHVRGDSETDL  
EALFNAVMPKNTANVPQTVPMRLRKL PDSFFKQPEPKSHSRQASTDAGTAGALTPQH VRAHSSPASLQLGAVSPG  
TLSPSGVVS GPGAAPTQHLRQSSFEIPDDVPLPAGWEMAKTSSGQRYFLNHIDQTTTWDPRKALLSQMNV TAP  
TSPPVQQNIMNSASAMNQRI SQSAPVKQPPPLAPQSPQGGV LGGSSNQQQQIRLQQLQLEKERLRLKHQELLRQ  
EIAIRSQIPTVEQDGGIQNPVSSPGMNQELRTMTTNSSDPFLNSGTYHSRDESTDSGLSMSSYSVPRTPDDFLNS  
VDEM DTGDSISQSNIP SQQRFPDYLEAIPGTNVDLGTLEG DGMNIEGEE LMPSLQEALSSDILNDMESV LAATK  
LDKESFLTWL PMRLRKL PDSFFKQP

rs:XP\_001377183 [XP\_001377183] PREDICTED: protein **FAM181B** [Monodelphis  
domestica]. 245..259

MAVQAAILSPHHFIPFCFPGSPGALGMDFGDLKGCCEDEAGGTGAALLGEAVAAEGADGGGGGGDF  
REATRDLLSFIDSASSNIKLALDKPVKSKRKNHRKYLQKQIKRCTGMMTSSPASASGPAPSASPSGPA AAVSV  
GALEAPTKRPPSASPAAPGTQSKAPKREGSQA AASLQSKSLAALFDSLHQVRGGGGEKGGAGTLAAVTGGGGGG  
GSGGAGVEGGVPAVAPPGAGGNKKVPLRNRNLPPSFFTEPSRAGSCGPGSGGVTLRELEKGEAVEFFELLGPDY  
CAGGEVGGLLPSEPLDLFPAAVRPPQELEHILYDPHPTLVAGLLYSEPWSTPCPPAKKPAPVSNRGGGLTLNET  
LRPLYSSTSDSAASSLSSPGGEDTAGHLTPFSQFFPDCALPTPPPHQMPYDYGVS RVAYSGL  
PLRNRNLPPSFFTEP

rs:XP\_007499387 [XP\_007499387] PREDICTED: uncharacterized protein  
LOC100618561 [Monodelphis domestica]. 214..228

MAAGVIRTLCDFRLQAPFHQPFVPTTSHQDPDFPETSEEEEEDEGEEEDGEKQIEDLELAGSSPGGQSS  
DHELAKGPTRPSSTEMTLQLLRFSELISCDIQKYFGQKTKDEDPDACNIYEDSHPPGKSARELYYADLMQIVQ  
SGDQDEEDTDTASLPRGLDCQVRFISSRDALKLGLPLVELFEYGLCQYARQVRVSDSRRMRLEKKYGHITPMHKRK  
LPQSFWKEPAPSSLCLLNTSTPDFSDLLANWTS DVAQELHSVGGRELGRHALEM DHLEEA  
PMHKRKL P QSFWKEP

rs:XP\_006786215 [XP\_006786215] PREDICTED: protein **FAM181A**-like  
[Neolamprologus brichardi]. 102..116

MANADSEVKTL LN FVN LASSDIKAALDKSAPCRRSVDHRKYLQKQLKRFSQKYSRVPRCHTHRSAEYRC  
AKPMGSVHQSVAEKASSGAQDQDVLGG SVEQVPMRKRQLPASFWEEP KLTPTKREHSYLGMRSHAGTSEGTENE  
KRKRSYDDDAKAAISACSRRSSADKETLKV DVTSHHCVSVCGCCPFQYHGHI LHNHIFVPHPLGLWSKAAGTE  
TERSEHPYGQKIHTHV VVKPIPTKPTAQSPIFS VFGFI PMRKRQLPASFWEEP

rs:XP\_006796689 [XP\_006796689] PREDICTED: protein **FAM181B**-like  
[Neolamprologus brichardi]. 155..169

MAVQTAIMNPQFMNFCFPGSVMEYDVEKSLDGSLLGETENDEYKETT RDLLSFIDSASSNIKLALDKP  
VSKRKNHRKYLQKQIKRCTGIITPGNAAEAPVKRQGSPLTQPSTLQSKTLPKRDGVQANLQSKSLAALFSPVK  
DIRGEKPKKPLRHRNLPPSFFTEPANCSKVSSTSGMTLKD LERGNPEATEFFELLGPDYCNMVSDQDIYQGMP L  
RVQPELGGPD PASYDTHHLVGGLLYSEPWSTSCSGPSKVKGESLR TGPAQPPVYCQSEGATGPIEDNALCTLA FPN  
FFADCP IQV TYDLTGGYNRANYSSL PLRHRNLPPSFFTEP

rs:XP\_006796706 [XP\_006796706] PREDICTED: yorkie homolog [Neolamprologus brichardi]. 45..59

MDPSQHNPPAGHQIVHVRGDSETDLEALFNAVMPKVNTPHVSVPMMRKLKLPDSFFKPPPEPKSHSRQAS  
TDAGSGGVLIPIHVRHSSPASLQLGAVSGGSLSGMGSTGASPOHLRQSSYEIPDDLPLPDGWEMAKTASGQRYF  
LNHLIKTNTWRTSTKSALLQMNQPAPPSSVPVQPPQIMNPASGPLPDGWEQAITAEGEIYYINHKNKTTSWLDP  
LEPRYALNQQRISQSAPVKQAGQLPPSISGVMGSNNQMRLOMEKERLRQKQOELLRQRPQELALRNQLPTSMDD  
GSTNPVSSPMAQDARTMTANSSDPFLNSGTYSRDESTDSGLSMSSYSVPRTPDFFLNSVDEMDTGDPLAPSMAT  
QPSRFPDYLDITPGTDVLDLTLEGESMAVEGEELMPSLQEQALSSDILNDMESVLAATKLDKESFLTWL  
PMRMRKLKLPDSFFKPP

rs:XP\_006747631 [XP\_006747631] PREDICTED: protein **FAM181B** [Leptonychotes weddellii].>tr:A0A2U3YV81\_LEPWE [A0A2U3YV81] SubName: Full=protein **FAM181B** {ECO:0000313|RefSeq:XP\_006747631.1}; 221..235

MAVQAALLSTHPFVFPFGGSPDGLGGAFGALDKGCCFEDDETGTTPAGALLAGAEGGDVREATRDLISF  
IDSASSNIKLALDKPGKSKRKNVHRKYLQKQIKRCSGLMGAAPPSPGPAADAPAKRHPAAPGAQTVAVPPHGK  
AAPRREASQAAAAASLQSRSLAALFDSLHRVPGGDERARGSVAAVAVAGLGGAGAVGSGGDAAGPAGGTAVPGARK  
VPLRARNLPPSFFTEPSRAGGGGCGSPGVS LGDLEKGAEEFFELLGPDYGVGTEASVLLAAEPLDVFP  
AVLRGPPPELEPGLFEPPEPAMVGSLLYSESWSAPGCPPTKKPPLAAPRGGLTLNEPLRSLYPSAADS  
PGGEDAPGL LASFAPFFSDCALPPPPPPPHQVSYDYSAGYSRTAYSSLWRPDGVWEGAPGEEGAHRD  
PLRARNLPPSFFTEP

rs:XP\_006747904 [XP\_006747904] PREDICTED: protein **FAM181A** [Leptonychotes weddellii].>tr:A0A2U3YVZ0\_LEPWE [A0A2U3YVZ0] SubName: Full=protein **FAM181A** {ECO:0000313|RefSeq:XP\_006747904.1}; 180..194

MKLLQMLLRGRPAARGLRSARQVSSVFPFGAASHQOQSPRSSWKAPCSGPLVMASDSDVKMLLNFNVLAS  
SDIKAALDKSAPCRRSVDHRKYLQKQLKRFSQKYSRLPRGLPGRGAEPHLKRGPEDRPGRPLDSDGQDCSPGGG  
CYKEKALGNPYREECLSRQTLQRQNPAAARPGQVPMRKRQLPASFWEEPRTHTSYPLGLEGGLPREGPPYEGK  
KHCKGLEPLDPEMAPVPASPRALAEKEPLKMSGVSLVGRVNAWSCCFFQYHGQPIYAGHPGALPQSPVPSLGLWR  
KSPASPGELAHFCKDVGPGQKVYRPVVLKPIPTKPAVPPPIFNVFGYL PMRKRQLPASFWEEP

rs:XP\_006879161 [XP\_006879161] PREDICTED: protein **FAM181A** [Elephantulus edwardii]. 130..144

MASDSDVKMLLNFNVLASSDIKAALDKSAPCRRSVDHRKYLQKQLRRFSQKYSRLPRGLPGRGAEPHLR  
RGPEDRPGRPLDGHAPSPGLGGGCQEKALGNSDREECPSGEQEPTPQGHPEGALPGQVPMRKRQLPASFWEEP  
RPAHSFPMGLEGGLPREGAPYEGKKTQCQVLEPLGPEMVPMPPLSPRALAEKELLKMSGVSLVGHINAWGCCFFQY  
HGQPVYPGPPGVLPQCSVPSLGLWRTSPVSPGELPPFCKDVSQKVHRPVVLKPIPTRPAVPPPLFNVFSYL  
PMRKRQLPASFWEEP

rs:XP\_006882960 [XP\_006882960] PREDICTED: protein **FAM181B** [Elephantulus edwardii]. 221..235

MAVQAALLSPHPFVFPFGFASASDGLGGAFGALDKGCCFEDDENRAPGTGLVAEAEAGGDVREATRDLISF  
IDSASSNIKLALDKPGKSKRKNVHRKYLQKQIKRCSGLMGAAPPSPGPAADTPAKRSPAAPSAPTAVVPAHGK  
AAPRREASQAAAAASLQSRSLAALFDSLHHPASDEPAGGAVVTPAAGLSGTSAGSAGGDKVSPAGGAVTPGTRK  
VPLRARNLPPSFFTEPSQAGGGGCGPAGPGVSLGDLEKGAEEFFELLEPDYGTGNEAGVLLAAEPLDVFPAGA  
TALRGPPDLESGLFEPPEPMSVGSLLYPESWSAPAPAAKMPVAVARGGLTLNEPLRPLYPAAADS  
PGGEDGPGQL ASFSPFFPDCALPLPPPPPHQAPYDYGAGYSRTPYTSLWRPDGVWEEVPGEEGAHQD  
PLRARNLPPSFFTEP

rs:XP\_002734168 [XP\_002734168] PREDICTED: yorkie homolog [Saccoglossus kowalevskii]. 45..59

MTMDPKGHQIVHVRGSDTDLEDLFRAVMNPTGIVKEPLPQHPVPLRMRKLKLPDSFFKPPKPMASSPSG  
SHSRESSTDNTPGGPFGAQTGLGLPVNHRAHSSPASLQMQAAAAASQQQQQTVTPQHTRHTSYDVTTIEDLPLP  
PGWEVARTPSGQRYFLNHMDQTTTWNDRKNTQAQLAQLQQAQARALLQQQQPQQQQPDLGLPATWEQAS  
TPEGELYFINHIDRTTSWLDPRGLRATAGQTVGLSGTQLNRNQQIQQALQQQLQAQQQGPLSRQQQHPQKERL  
QQQLQLEREKLRRRQLEIQQQEMLIRKEIVGEDGQPVSKSNQSQDREMTSVSTTGVDPFLSGGTYHSRDESGDSG  
LGMSSNYSLPRTPDDMLSNVDEMDTSDGKPDMAATPIQTPMNDYLESMTQGTNVDIGSLEDEEGDDLVP  
SLQEQALSSDILTDEAVLSPHKIENFLTWL PLRMRKLKLPDSFFKPP

rs:XP\_006887372 [XP\_006887372] PREDICTED: yorkie homolog isoform X1 [Elephantulus edwardii]. 85..99

MDPGQQPPPQVPVQGGQPPAQQPPQGDQPSRPGQPAPPGSQAAPQAPPAGHQIVHVRGDSETDLEALF  
NAVMPKKTANVPPTVPMRLRKLKLPDSFFKPPPEPKSHSRQVSTDAGTAGALAPQHVAHSSPASLQLGAVSPGALS  
TGVSVPAAATPTAQHLRQSSFEIPDDVPLPAGWEMAKTSSGQRYFLNHIDQTTTWQDPRKAMLSQLNVTAPTSP  
VQQNMMNSASGPLPDGWEQAMTQDGEIYYINHKNKTTSWLDPRLDPRFAINQRIGQSAPLKQPPPLAPQSPQGGI  
MGGGNSNQQQMRLQQLQMEKERLRLKQOELLRQVRPQAMRNINPSTANSPKCQELALRSQLPTLEQDGGTQNPV  
SSPGMSQELRTMTTNSSDPFLNSGTYSRDESTDSGLSMSSYSVPRTPDDFLNSVDEMDTGDTINQSTLPSQQNR  
FPDYLEAIPGTNVDLGTLEGDGMNIEGEEELMPSLQEQALSSDILNDMESVLAATKLDKESFLTWL  
PMRLRKLKLPDSFFKPP

rs:XP\_006887373 [XP\_006887373] PREDICTED: yorkie homolog isoform X2  
[Elephantulus edwardii]. 85..99

MDPGQQPPPQVPVQGGQPPAQQPPQGDQPSRPGQPAPPGSQAAPQAPPAGHQIVHVRGDSETDLEALF  
NAVMPKKTANVPPTVPMRLRKLKLPDSFFKPPPEPKSHSRQVSTDAGTAGALAPQHVAHSSPASLQLGAVSPGALS  
TGVSVPAAATPTAQHLRQSSFEIPDDVPLPAGWEMAKTSSGQRYFLNHIDQTTTWQDPRKAMLSQLNVTAPTSP  
VQQNMMNSASGPLPDGWEQAMTQDGEIYYINHKNKTTSWLDPRLDPRFAINQRIGQSAPLKQPPPLAPQSPQGGI  
MGGGNSNQQQMRLQQLQMEKERLRLKQOELLRQVRPQELALRSQLPTLEQDGGTQNPVSSPGMSQELRTMTTNS  
SDPFLNSGTYSRDESTDSGLSMSSYSVPRTPDDFLNSVDEMDTGDTINQSTLPSQQNRFPDYLEAIPGTNVDL  
GTLEGDGMNIEGEEELMPSLQEQALSSDILNDMESVLAATKLDKESFLTWL  
PMRLRKLKLPDSFFKPP

rs:XP\_006887374 [XP\_006887374] PREDICTED: yorkie homolog isoform X3  
[Elephantulus edwardii]. 85..99

MDPGQQPPPQVPVQGGQPPAQQPPQGDQPSRPGQPAPPGSQAAPQAPPAGHQIVHVRGDSETDLEALF  
NAVMPKKTANVPPTVPMRLRKLKLPDSFFKPPPEPKSHSRQVSTDAGTAGALAPQHVAHSSPASLQLGAVSPGALS  
TGVSVPAAATPTAQHLRQSSFEIPDDVPLPAGWEMAKTSSGQRYFLNHIDQTTTWQDPRKAMLSQLNVTAPTSP  
VQQNMMNSASGPLPDGWEQAMTQDGEIYYINHKNKTTSWLDPRLDPRFAINQRIGQSAPLKQPPPLAPQSPQGGI  
MGGGNSNQQQMRLQQLQMEKERLRLKQOELLRQVRPQELALRSQLPTLEQDGGTQNPVSSPGMSQELRTMTTNS  
SDPFLNSGTYSRDESTDSGLSMSSYSVPRTPDDFLNSVDEMDTGDTINQSTLPSQQNRFPDYLEAIPGTNVDL  
GTLEGDGMNIEGEEELMPSLQEQALSSDILNDMESVLAATKLDKESFLTWL PMRLRKLKLPDSFFKPP

rs:XP\_006887375 [XP\_006887375] PREDICTED: yorkie homolog isoform X4  
[Elephantulus edwardii]. 85..99

MDPGQQPPPQVPVQGGQPPAQQPPQGDQPSRPGQPAPPGSQAAPQAPPAGHQIVHVRGDSETDLEALF  
NAVMPKKTANVPPTVPMRLRKLKLPDSFFKPPPEPKSHSRQVSTDAGTAGALAPQHVAHSSPASLQLGAVSPGALS  
TGVSVPAAATPTAQHLRQSSFEIPDDVPLPAGWEMAKTSSGQRYFLNHIDQTTTWQDPRKAMLSQLNVTAPTSP  
VQQNMMNSASGPLPDGWEQAMTQDGEIYYINHKNKTTSWLDPRLDPRFAINQRIGQSAPLKQPPPLAPQSPQGGI  
MGGGNSNQQQMRLQQLQMEKERLRLKQOELLRQELALRSQLPTLEQDGGTQNPVSSPGMSQELRTMTTNSDP  
FLNSGTYSRDESTDSGLSMSSYSVPRTPDDFLNSVDEMDTGDTINQSTLPSQQNRFPDYLEAIPGTNVDLGT  
LEGDGMNIEGEEELMPSLQEQALSSDILNDMESVLAATKLDKESFLTWL PMRLRKLKLPDSFFKPP

rs:XP\_006887376 [XP\_006887376] PREDICTED: yorkie homolog isoform X5  
[Elephantulus edwardii]. 70..84

MDPGQQPPPQVPVQGGQPPAQQPPQGDQPSRPGQPAPPGSQAAPQAPPAGHQIVHVRGDSETDLEALFNAVMPKKTANVPPTV  
PMRLRKLKLPDSFFKPPPEPKSHSRQVSTDAGTAGALAPQHVAHSSPASLQLGAVSPGALSPTGVVSGPAATPTAQH  
LRQSSFEIPDDVPLPAGWEMAKTSSGQRYFLNHIDQTTTWQDPRKAMLSQLNVTAPTSPVQQNMMNSASGPLPD  
GWEQAMTQDGEIYYINHKNKTTSWLDPRLDPRFAINQRIGQSAPLKQPPPLAPQSPQGGIMGGGNSNQQQMRLQ  
QLQMEKERLRLKQOELLRQAMRNINPSTANSPKCQELALRSQLPTLEQDGGTQNPVSSPGMSQELRTMTTNSDP  
FLNSGTYSRDESTDSGLSMSSYSVPRTPDDFLNSVDEMDTGDTINQSTLPSQQNRFPDYLEAIPGTNVDLGT  
LEGDGMNIEGEEELMPSLQEQALSSDILNDMESVLAATKLDKESFLTWL PMRLRKLKLPDSFFKPP

rs:XP\_006887377 [XP\_006887377] PREDICTED: yorkie homolog isoform X6  
[Elephantulus edwardii]. 85..99

MDPGQQPPPQVPVQGGQPPAQQPPQGDQPSRPGQPAPPGSQAAPQAPPAGHQIVHVRGDSETDLEALF  
NAVMPKKTANVPPTVPMRLRKLKLPDSFFKPPPEPKSHSRQVSTDAGTAGALAPQHVAHSSPASLQLGAVSPGALS  
TGVSVPAAATPTAQHLRQSSFEIPDDVPLPAGWEMAKTSSGQRYFLNHIDQTTTWQDPRKAMLSQLNVTAPTSP  
VQQNMMNSASAINQRIGQSAPLKQPPPLAPQSPQGGIMGGGNSNQQQMRLQQLQMEKERLRLKQOELLRQVRPQ  
AMRNINPSTANSPKCQELALRSQLPTLEQDGGTQNPVSSPGMSQELRTMTTNSDPFLNSGTYSRDESTDSGLS  
MSSYSVPRTPDDFLNSVDEMDTGDTINQSTLPSQQNRFPDYLEAIPGTNVDLGTLEGDGMNIEGEEELMPSLQEQ  
ALSSDILNDMESVLAATKLDKESFLTWL PMRLRKLKLPDSFFKPP

rs:XP\_006887378 [XP\_006887378] PREDICTED: yorkie homolog isoform X7  
[Elephantulus edwardii]. 85..99

MDPGQQPPPQVPVQGGQPPAQQPPQGDQPSRPGQPAPPGSQAAPQAPPAGHQIVHVRGDSETDLEALF  
NAVMPKNTANVPPTVPMRLRKLKLPDSFFKPPPEPKSHSRQVSTDAGTAGALAPQHVAHSSPASLQLGAVSPGALS  
TGVSVPAAATPTAQHLRQSSFEIPDDVPLPAGWEMAKTSSGQRYFLNHIDQTTTWQDPRKAMLSQLNVTAPTSP  
VQQNMMNSASAINQRIGQSAPLKQPPPLAPQSPQGGIMGGNSNQQQMRLQQLQMEKERLRLKQQLLRQAMRN  
INPSTANSPKCQELALRSQLEQDGGTQNPVSSPGMSQELRTMTTNSSDPFLNSGTYHSRDESTDSGLSMSSY  
SVPRTPDFFLNSVDEMGTGDTINQSTLPSQQNRFPDYLEAIPGTNVDLGTLEGDGMNIEGEEELMPSLQALSSDI  
LNDMESVLAATKLDKESFLTWL PMRLRKLKLPDSFFKPP

rs:XP\_006887379 [XP\_006887379] PREDICTED: yorkie homolog isoform X8  
[Elephantulus edwardii]. 85..99

MDPGQQPPPQVPVQGGQPPAQQPPQGDQPSRPGQPAPPGSQAAPQAPPAGHQIVHVRGDSETDLEALF  
NAVMPKNTANVPPTVPMRLRKLKLPDSFFKPPPEPKSHSRQVSTDAGTAGALAPQHVAHSSPASLQLGAVSPGALS  
TGVSVPAAATPTAQHLRQSSFEIPDDVPLPAGWEMAKTSSGQRYFLNHIDQTTTWQDPRKAMLSQLNVTAPTSP  
VQQNMMNSASAINQRIGQSAPLKQPPPLAPQSPQGGIMGGNSNQQQMRLQQLQMEKERLRLKQQLLRQVRFQ  
ELALRSQLEQDGGTQNPVSSPGMSQELRTMTTNSSDPFLNSGTYHSRDESTDSGLSMSSYSVPRTPDFFLNS  
VDEMGTGDTINQSTLPSQQNRFPDYLEAIPGTNVDLGTLEGDGMNIEGEEELMPSLQALSSDI  
LNDMESVLAATKLDKESFLTWL PMRLRKLKLPDSFFKPP

rs:XP\_006887380 [XP\_006887380] PREDICTED: yorkie homolog isoform X9  
[Elephantulus edwardii]. 85..99

MDPGQQPPPQVPVQGGQPPAQQPPQGDQPSRPGQPAPPGSQAAPQAPPAGHQIVHVRGDSETDLEALF  
NAVMPKNTANVPPTVPMRLRKLKLPDSFFKPPPEPKSHSRQVSTDAGTAGALAPQHVAHSSPASLQLGAVSPGALS  
TGVSVPAAATPTAQHLRQSSFEIPDDVPLPAGWEMAKTSSGQRYFLNHIDQTTTWQDPRKAMLSQLNVTAPTSP  
VQQNMMNSASAINQRIGQSAPLKQPPPLAPQSPQGGIMGGNSNQQQMRLQQLQMEKERLRLKQQLLRQELAL  
RSQLEQDGGTQNPVSSPGMSQELRTMTTNSSDPFLNSGTYHSRDESTDSGLSMSSYSVPRTPDFFLNSVDEM  
DTGDTINQSTLPSQQNRFPDYLEAIPGTNVDLGTLEGDGMNIEGEEELMPSLQALSSDI  
LNDMESVLAATKLDKESFLTWL PMRLRKLKLPDSFFKPP

rs:XP\_002737352 [XP\_002737352] PREDICTED: E3 ubiquitin-protein ligase  
BRE1A-like [Saccoglossus kowalevskii]. 113..127

MSGKRGPTLALSGSDEDSCDHDEVANSTEDACPTSPCSSTNSGPTYVVRTAGFKHHGHTFYKLRHTKQP  
KHKKKKHMISTESLITTSFKKKRDPLAALGGPIHRTKPKKEPLPMKLRALPQSFQQPNAVNTASPMNFKILPP  
LYKQETGEDVTDVDPVTPPDETKEEKEEKLRETKEKEIKEAKDLKEAKEIKDAKEREIKDAKEREIKDAKEREMK  
DTKEREIKDSKEKETKEKLRIRPPLCPRPPPRIIFTASTAETDLLVTLFDGIENEKKKKI IKRGRPKRVQTVENK  
PLQGEDPYMIENITEGLLPMLSLNEMKHSSVATHQLSMVSLREGDKSLTLPSTLVEQNYSHMLSELVNAL  
PMKLRALPQSFQQP

rs:XP\_006833824 [XP\_006833824] PREDICTED: yorkie homolog isoform X1  
[Chrysochloris asiatica]. 85..99

MDPGQQPPPQSGPQGGQPPAQQPPQGDAPARPGQPAPPGSQAPQAPPAGHQIVHVRGDSETDLEALF  
NAVMPKNTANVPPTVPMRLRNLKLPDSFFKPPPEPKSHSRQVSTDAGTAGALAPQHVAHSSPASLQLGAVSPGTLSP  
TGVSVPAAAPTAQHLRQSSFEIPDDVPLPAGWEMAKTSSGQRYFLNHIDQTTTWQDPRKAMLSQMNVTAPTSP  
VQQNMINASGPLPDGWEQAMTQDGEIYYINHKNKTTSWLDPRLDPRFAINQRISQSAPVKQPPPLAPQSPQGGV  
MGGNSNSNQQQQIRLQQLQMEKERLRLKQQLLRQVRFQAMRNINPSTANSPKCQELALRSQLEQDGGTQNPV  
SSPGMSQELRTMTTNSSDPFLNSGTYHSRDESTDSGLSMSSYSVPRTPDFFLNSVDEMGTGDTINQSTLPSQQNR  
FPDYLEAIPGTNVDLGTLEGVGMNIEGEEELMPSLQALSSDI  
LNDMESVLAATKLDKESFLTWL  
PMRLRNLKLPDSFFKPP

rs:XP\_006833825 [XP\_006833825] PREDICTED: yorkie homolog isoform X2  
[Chrysochloris asiatica]. 85..99

MDPGQQPPPQSGPQGGQPPAQQPPQGDAPARPGQPAPPGSQAPQAPPAGHQIVHVRGDSETDLEALF  
NAVMPKNTANVPPTVPMRLRNLKLPDSFFKPPPEPKSHSRQVSTDAGTAGALAPQHVAHSSPASLQLGAVSPGTLSP  
TGVSVPAAAPTAQHLRQSSFEIPDDVPLPAGWEMAKTSSGQRYFLNHIDQTTTWQDPRKAMLSQMNVTAPTSP  
VQQNMINASGPLPDGWEQAMTQDGEIYYINHKNKTTSWLDPRLDPRFAINQRISQSAPVKQPPPLAPQSPQGGV  
MGGNSNSNQQQQIRLQQLQMEKERLRLKQQLLRQAMRNINPSTANSPKCQELALRSQLEQDGGTQNPVSSPG  
MSQELRTMTTNSSDPFLNSGTYHSRDESTDSGLSMSSYSVPRTPDFFLNSVDEMGTGDTINQSTLPSQQNRFPDY



LEAIPGTNVDLGTLEGVGMNIEGEEELMPSLQEQALSSDILNDMESVLAATKLDKESFLTWL  
PMRLRNLPDSFFKPP

rs:XP\_006833826 [XP\_006833826] PREDICTED: yorkie homolog isoform X3  
[Chrysochloris asiatica]. 85..99

MDPGQQPPPQSGPQGGQPPAQPPQGDAPARPGQPAPPGSQPAPQAPPAGHQIVHVRGDSETDLEALF  
NAVMNPKTANVPPTVPMRLRNLPDSFFKPPPEPKSHSRQVSTDAGTAGALAPQHVRHSSPASLQLGAVSPGTLSP  
TGVVSGPAAAPTAQHRLRQSSFEIPDDVPLPAGWEMAKTSSGQRYFLNHIDQTTTWQDPRKAMLSQMNVTAPTSPP  
VQQNMINASGPLPDGWEQAMTQDGEIYYINHKNKTTSWLDPRLDPRFAINQRISQSAPVKQPPPLAPQSPQGGV  
MGGSNSNQQQQIRLQQLQMEKERLRLKQQELLRQVRPQELALRSQLPTLEQDGGTQNPVSSPGMSQELRTMTTNS  
SDPFLNSGTYSRDESTDSGLSMSSYSVPRTPDDFLNSVDEMMDTGDITNQSTLPSQQNRFPDYLEAIPGTNVDLGT  
LEGVGMNIEGEEELMPSLQEQALSSDILNDMESVLAATKLDKESFLTWL PMRLRNLPDSFFKPP

rs:XP\_006833827 [XP\_006833827] PREDICTED: yorkie homolog isoform X4  
[Chrysochloris asiatica]. 85..99

MDPGQQPPPQSGPQGGQPPAQPPQGDAPARPGQPAPPGSQPAPQAPPAGHQIVHVRGDSETDLEALF  
NAVMNPKTANVPPTVPMRLRNLPDSFFKPPPEPKSHSRQVSTDAGTAGALAPQHVRHSSPASLQLGAVSPGTLSP  
TGVVSGPAAAPTAQHRLRQSSFEIPDDVPLPAGWEMAKTSSGQRYFLNHIDQTTTWQDPRKAMLSQMNVTAPTSPP  
VQQNMINASGPLPDGWEQAMTQDGEIYYINHKNKTTSWLDPRLDPRFAINQRISQSAPVKQPPPLAPQSPQGGV  
MGGSNSNQQQQIRLQQLQMEKERLRLKQQELLRQELALRSQLPTLEQDGGTQNPVSSPGMSQELRTMTTNSSDPF  
LNSGTYSRDESTDSGLSMSSYSVPRTPDDFLNSVDEMMDTGDITNQSTLPSQQNRFPDYLEAIPGTNVDLGTLEG  
VGMNIEGEEELMPSLQEQALSSDILNDMESVLAATKLDKESFLTWL PMRLRNLPDSFFKPP

rs:XP\_006833828 [XP\_006833828] PREDICTED: yorkie homolog isoform X5  
[Chrysochloris asiatica]. 85..99

MDPGQQPPPQSGPQGGQPPAQPPQGDAPARPGQPAPPGSQPAPQAPPAGHQIVHVRGDSETDLEALF  
NAVMNPKTANVPPTVPMRLRNLPDSFFKPPPEPKSHSRQVSTDAGTAGALAPQHVRHSSPASLQLGAVSPGTLSP  
TGVVSGPAAAPTAQHRLRQSSFEIPDDVPLPAGWEMAKTSSGQRYFLNHIDQTTTWQDPRKAMLSQMNVTAPTSPP  
VQQNMINASAINQRISQSAPVKQPPPLAPQSPQGGVMGGSNSNQQQQIRLQQLQMEKERLRLKQQELLRQVRPQ  
AMRNINPSTANSKQELALRSQLPTLEQDGGTQNPVSSPGMSQELRTMTTNSSDPFLNSGTYSRDESTDSGLS  
MSSYSVPRTPDDFLNSVDEMMDTGDITNQSTLPSQQNRFPDYLEAIPGTNVDLGTLEGVGMNIEGEEELMPSLQEQAL  
SSDILNDMESVLAATKLDKESFLTWL PMRLRNLPDSFFKPP

rs:XP\_006833829 [XP\_006833829] PREDICTED: yorkie homolog isoform X6  
[Chrysochloris asiatica]. 85..99

MDPGQQPPPQSGPQGGQPPAQPPQGDAPARPGQPAPPGSQPAPQAPPAGHQIVHVRGDSETDLEALF  
NAVMNPKTANVPPTVPMRLRNLPDSFFKPPPEPKSHSRQVSTDAGTAGALAPQHVRHSSPASLQLGAVSPGTLSP  
TGVVSGPAAAPTAQHRLRQSSFEIPDDVPLPAGWEMAKTSSGQRYFLNHIDQTTTWQDPRKAMLSQMNVTAPTSPP  
VQQNMINASAINQRISQSAPVKQPPPLAPQSPQGGVMGGSNSNQQQQIRLQQLQMEKERLRLKQQELLRQAMRN  
INPSTANSKQELALRSQLPTLEQDGGTQNPVSSPGMSQELRTMTTNSSDPFLNSGTYSRDESTDSGLSMSSY  
SVPRTPDDFLNSVDEMMDTGDITNQSTLPSQQNRFPDYLEAIPGTNVDLGTLEGVGMNIEGEEELMPSLQEQALSSDI  
LNDMESVLAATKLDKESFLTWL PMRLRNLPDSFFKPP

rs:XP\_006833830 [XP\_006833830] PREDICTED: yorkie homolog isoform X7  
[Chrysochloris asiatica]. 85..99

MDPGQQPPPQSGPQGGQPPAQPPQGDAPARPGQPAPPGSQPAPQAPPAGHQIVHVRGDSETDLEALF  
NAVMNPKTANVPPTVPMRLRNLPDSFFKPPPEPKSHSRQVSTDAGTAGALAPQHVRHSSPASLQLGAVSPGTLSP  
TGVVSGPAAAPTAQHRLRQSSFEIPDDVPLPAGWEMAKTSSGQRYFLNHIDQTTTWQDPRKAMLSQMNVTAPTSPP  
VQQNMINASAINQRISQSAPVKQPPPLAPQSPQGGVMGGSNSNQQQQIRLQQLQMEKERLRLKQQELLRQVRPQ  
ELALRSQLPTLEQDGGTQNPVSSPGMSQELRTMTTNSSDPFLNSGTYSRDESTDSGLSMSSYSVPRTPDDFLNS  
VDEMMDTGDITNQSTLPSQQNRFPDYLEAIPGTNVDLGTLEGVGMNIEGEEELMPSLQEQALSSDILNDMESVLAATK  
LDKESFLTWL PMRLRNLPDSFFKPP

rs:XP\_006833831 [XP\_006833831] PREDICTED: yorkie homolog isoform X8  
[Chrysochloris asiatica]. 85..99

MDPGQQPPPQSGPQGGQPPAQPPQGDAPARPGQPAPPGSQPAPQAPPAGHQIVHVRGDSETDLEALF  
NAVMNPKTANVPPTVPMRLRNLPDSFFKPPPEPKSHSRQVSTDAGTAGALAPQHVRHSSPASLQLGAVSPGTLSP  
TGVVSGPAAAPTAQHRLRQSSFEIPDDVPLPAGWEMAKTSSGQRYFLNHIDQTTTWQDPRKAMLSQMNVTAPTSPP  
VQQNMINASAINQRISQSAPVKQPPPLAPQSPQGGVMGGSNSNQQQQIRLQQLQMEKERLRLKQQELLRQELAL

RSQLPTLEQDGGTQNPVSSPGMSQELRTMTTNSSDPFLNSGTYHSRDESTDSGLSMSSYSVPRTPDDFLNSVDEM  
DTGDTINQSTLPSQQNRFPDYLEAIPGTNVDLGTLEGVGMNIEGEEELMPSLQEQALSSDILNDMESVLAATKLDKE  
SFLTWL PMRLRNLPDSFFKPP

rs:XP\_006839692 [XP\_006839692] PREDICTED: protein **FAM181A** [Chrysochloris asiatica]. 130..144

MASDSVDMKLLNFVNLAASSDIKAALDKSAPCRRSVDHRKYLQKQLKRFSQKCSRLPRGLPGRAAEPHLK  
RGSEDRPARLPLQCHQPSPPGGVGGCQEKALGSPDRGEYLSGQQEQGLHGQSLEAARPGQVPMRKRQLPASFWEEP  
RPAHSFPLGLEGLGPREGPPYKCKKTCQGLES LGPETAPVCLSPRALVEETLRMPGVSLVGHVNAWSSCSLQYH  
GQPMYPGPVGVLPQGSVPSLGLWRTSPVSPGELAPCCKDVGPGQKVYRPVVLKPIPTKPAVPPPFIHFVFGSL  
PMRKRQLPASFWEEP

rs:XP\_006865043 [XP\_006865043] PREDICTED: protein **FAM181B** [Chrysochloris asiatica]. 221..235

MAVQAALLSPHPFVSFGFAGAPNGLGGAFGALDKGCCFEDDETRAPAGVLLAEAEAGGDVREATRDLLSF  
IDSASSNIKALDKPGKSKRKNVHRKYLQKQIKRCSGLMGTAPPGPSGAADTQAKRSPAAPSAPTVAVPAHGK  
AAPRREASQAAAAASLQSRSLAALFDSL RHIPAGDEPAGGAVAAPATGLSGSGAGNAGGEVVGPAAGAVVPGARK  
VPLRARNLPPSFFTEPSRAGSGGCGTSGPGISLGDLEKGAEEVEFFFLGPDYAGTEAGVLLTPEPLDVFPAT  
AALRGPPELEPGLFEPSSAMVGSLLYSESWSTPGOPTKKMPLTGSRGALTLNEPLRPLYPAAADSQGGEDGPGHL  
ASFAPFFPDCALPLTPAPHQVSYDYCASYNRTTYSNLWRS DGVWDEVPGEEGAHRD PLRARNLPPSFFTEP

rs:XP\_007900626 [XP\_007900626] PREDICTED: WW domain-containing transcription regulator protein 1 isoform X1 [Callorhinchus milii].

46..60

MDGSTTPAPAPGHTIVRVLGDSETDLEALFKAVMNPQAGSLPQGVPMRLRKLPESSFRPPDSGSHSRQA  
SGDSSPGPGPGGPPAGLPHFHIQHIRSHSSPASLPGPGPGGGPGYSHHRQOSFDNIDDVPLPPGWEMAKTPSGQ  
RYFLNHVDRIITWHDRKTL SQMNLNTAGSPGQMQRPMQLSHQNPVPEGWQAVTPEGEIYFINHKTKSTSW  
LDPRLDQLCMMTQQPLASGPTALGSPGPRMLNLSTALSVQQKHQQMRLQQIQMEKERIKHLQQELMRQEKA  
LYNQIPNQIPIESDNIPTAQNAVSTPTMTQEMHAI TNNGSDPFLNSGPYHSRQASADSGLG LGRTSEDFLGHVEE  
MDTGDMGQSALTANQPSRFPDFLDSLPGTNVDLGTLEGEDLMPSLQEPFETDILPDVESSLNPKETFLTWL  
PMRLRKLPESSFRPP

rs:XP\_007900627 [XP\_007900627] PREDICTED: WW domain-containing transcription regulator protein 1 isoform X2 [Callorhinchus milii].

46..60

MDGSTTPAPAPGHTIVRVLGDSETDLEALFKAVMNPQAGSLPQGVPMRLRKLPESSFRPPDSGSHSRQA  
SGDSSPGPGPGGPPAGLPHFHIQHIRSHSSPASLPGPGPGGGPGYSHHRQOSFDNIDDVPLPPGWEMAKTPSGQ  
RYFLNHVDRIITWHDRKTL SQMNLNTAGSPGQMQRPMQLSHQNPVMTQQPLASGPTALGSPGPRMLNLST  
ALSVQQKHQQMRLQQIQMEKERIKHLQQELMRQEKA LYNQIPNQIPIESDNIPTAQNAVSTPTMTQEMHAI TNN  
GSDPFLNSGPYHSRQASADSGLG LGRTSEDFLGHVEEMDTGDMGQSALTANQPSRFPDFLDSLPGTNVDLGTLEG  
EDLMPSLQEPFETDILPDVESSLNPKETFLTWL PMRLRKLPESSFRPP

rs:XP\_007902057 [XP\_007902057] PREDICTED: protein **FAM181A** [Callorhinchus milii]. 131..145

MASADSEVKTLNLFVNLAASSDIKAALDKSAPCRRSVDHRKYLQKQLKRFSQKYSRI PRCHPSRFVESGL  
KRVSEDKSRGSDTDHGDSNTQPQPCLKASCLLDQDPRGSLPGQPSAAEQGKQLSRQDQVPMRKRQLPASFWEE  
PRPPKNLQRSLSAFQTAEKVYGLAEGPSGGGGHRSQAQDLPEAGKQVRAAQLQDSSQREEPVKFHLTSLSRAMN  
VCGCCPFQYHGQQVYHSHSHLALPHSSFQDLGLWRKALATPAHDLHTYSKDSLNGQKVHKPIVFKPIPTKPPP  
LYNVYSFL PMRKRQLPASFWEEP

rs:XP\_007942704 [XP\_007942704] PREDICTED: protein **FAM181A** [Orycteropus afer afer]. 130..144

MASDSVDMKLLNFVNLAASSDIKAALDKSAPCRRSVDHRKYLQKQLKRFSQKYSRLPRGLPGRAAEPHLK  
RGPEDRPTRLLLDGHDPSPSGGGGCKEVLGNPDREESLSREQAQTLRGQNPEAARPGQVPMRKRQLPASFWEEP  
RPAHSFPMLEGALGPREGPVYESKKTCCQGLETLGPETAPVPMSPRALAEKEPLKMPGVSLVGRVNAWNCPPFY  
HGQPVYPGPPGALPQGSVPSLGLWRTSPTSPGELAPYCKDVGDLGQKVYRPVVLKPIPTKPAVPPPFIHFVFGYL  
PMRKRQLPASFWEEP

rs:XP\_007944206 [XP\_007944206] PREDICTED: yorkie homolog isoform X1  
[Orycteropus afer afer]. 85..99

MDPGQQPPPQVPVQGGQPPTQPPQGDPPSRTGQQAPPGSQAAPQAPPAGHQIVHVRGDSETDLEALF  
NAVMPKNTANVPPTVPMRLRKLKLPDSFFKPPPEPKSHSRQVSTDAGTAGALAPQHVAHSSPASLQLGAVSPGTLSP  
TGVVSGPAAAPTAQHLRQSSFEIPDDVPLPAGWEMAKTSSGQRYFLNHIDQTTTWQDPRKAMLSQMNVTAPTSP  
VQQSMINSASGPLPDGWEQAMTQDGEIYYINHKNKTTSWLDPRLDPRFAINQRISQSAPVKQPPPLAPQSPQGGV  
MGGGNSNQQQQMRLQQLQMEKERLRLKQOELLRQVRPQAMRNINPSTANSPKCQELALRSQLPTLEQDGGTQNPV  
SSPGMSQELRTMTTNSDPFLNSGTYHSRDESTDSGLSMSSYSVPRTPDDFLNSVDEMDTGDTINQSTLPSQQNR  
FPDYLEAIPGTNVDLGTLEGDGMNIEGEELMPSLQEQALSSDILNDMESVLAATKLDKESFLTWL  
PMRLRKLKLPDSFFKPP

rs:XP\_007944207 [XP\_007944207] PREDICTED: yorkie homolog isoform X2  
[Orycteropus afer afer]. 85..99

MDPGQQPPPQVPVQGGQPPTQPPQGDPPSRTGQQAPPGSQAAPQAPPAGHQIVHVRGDSETDLEALF  
NAVMPKNTANVPPTVPMRLRKLKLPDSFFKPPPEPKSHSRQVSTDAGTAGALAPQHVAHSSPASLQLGAVSPGTLSP  
TGVVSGPAAAPTAQHLRQSSFEIPDDVPLPAGWEMAKTSSGQRYFLNHIDQTTTWQDPRKAMLSQMNVTAPTSP  
VQQSMINSASGPLPDGWEQAMTQDGEIYYINHKNKTTSWLDPRLDPRFAINQRISQSAPVKQPPPLAPQSPQGGV  
MGGGNSNQQQQMRLQQLQMEKERLRLKQOELLRQAMRNINPSTANSPKCQELALRSQLPTLEQDGGTQNPVSSPG  
MSQELRTMTTNSDPFLNSGTYHSRDESTDSGLSMSSYSVPRTPDDFLNSVDEMDTGDTINQSTLPSQQNRFPDY  
LEAIPGTNVDLGTLEGDGMNIEGEELMPSLQEQALSSDILNDMESVLAATKLDKESFLTWL  
PMRLRKLKLPDSFFKPP

rs:XP\_007944208 [XP\_007944208] PREDICTED: yorkie homolog isoform X3  
[Orycteropus afer afer]. 74..88

MDPGQQPPPQPPPQGGQPPTQPPQGDPPSRTGQQAPPGSQAAPQAPPAGHQIVHVRGDSETDLEALFNAVMPKNTANV  
PPTVPMRLRKLKLPDSFFKPPPEPKSHSRQVSTDAGTAGALAPQHVAHSSPASLQLGAVSPGTLSP  
TAQHLRQSSFEIPDDVPLPAGWEMAKTSSGQRYFLNHIDQTTTWQDPRKAMLSQMNVTAPTSPVQQSMINSASG  
PLPDGWEQAMTQDGEIYYINHKNKTTSWLDPRLDPRFAINQRISQSAPVKQPPPLAPQSPQGGVMGGGNSNQQQQ  
MRLQQLQMEKERLRLKQOELLRQAMRNINPSTANSPKCQELALRSQLPTLEQDGGTQNPVSSPGMSQELRTMTTN  
SSDPFLNSGTYHSRDESTDSGLSMSSYSVPRTPDDFLNSVDEMDTGDTINQSTLPSQQNRFPDYLEAIPGTNVDL  
GTLEGDGMNIEGEELMPSLQEQALSSDILNDMESVLAATKLDKESFLTWL PMRLRKLKLPDSFFKPP

rs:XP\_007944209 [XP\_007944209] PREDICTED: yorkie homolog isoform X4  
[Orycteropus afer afer]. 85..99

MDPGQQPPPQVPVQGGQPPTQPPQGDPPSRTGQQAPPGSQAAPQAPPAGHQIVHVRGDSETDLEALF  
NAVMPKNTANVPPTVPMRLRKLKLPDSFFKPPPEPKSHSRQVSTDAGTAGALAPQHVAHSSPASLQLGAVSPGTLSP  
TGVVSGPAAAPTAQHLRQSSFEIPDDVPLPAGWEMAKTSSGQRYFLNHIDQTTTWQDPRKAMLSQMNVTAPTSP  
VQQSMINSASGPLPDGWEQAMTQDGEIYYINHKNKTTSWLDPRLDPRFAINQRISQSAPVKQPPPLAPQSPQGGV  
MGGGNSNQQQQMRLQQLQMEKERLRLKQOELLRQVRPQELALRSQLPTLEQDGGTQNPVSSPGMSQELRTMTTNS  
SDPFLNSGTYHSRDESTDSGLSMSSYSVPRTPDDFLNSVDEMDTGDTINQSTLPSQQNRFPDYLEAIPGTNVDL  
GTLEGDGMNIEGEELMPSLQEQALSSDILNDMESVLAATKLDKESFLTWL PMRLRKLKLPDSFFKPP

rs:XP\_007944210 [XP\_007944210] PREDICTED: yorkie homolog isoform X5  
[Orycteropus afer afer]. 85..99

MDPGQQPPPQVPVQGGQPPTQPPQGDPPSRTGQQAPPGSQAAPQAPPAGHQIVHVRGDSETDLEALF  
NAVMPKNTANVPPTVPMRLRKLKLPDSFFKPPPEPKSHSRQVSTDAGTAGALAPQHVAHSSPASLQLGAVSPGTLSP  
TGVVSGPAAAPTAQHLRQSSFEIPDDVPLPAGWEMAKTSSGQRYFLNHIDQTTTWQDPRKAMLSQMNVTAPTSP  
VQQSMINSASGPLPDGWEQAMTQDGEIYYINHKNKTTSWLDPRLDPRFAINQRISQSAPVKQPPPLAPQSPQGGV  
MGGGNSNQQQQMRLQQLQMEKERLRLKQOELLRQELALRSQLPTLEQDGGTQNPVSSPGMSQELRTMTTNSDPF  
LNSGTYHSRDESTDSGLSMSSYSVPRTPDDFLNSVDEMDTGDTINQSTLPSQQNRFPDYLEAIPGTNVDLGTLEG  
DGMNIEGEELMPSLQEQALSSDILNDMESVLAATKLDKESFLTWL PMRLRKLKLPDSFFKPP

rs:XP\_007944211 [XP\_007944211] PREDICTED: yorkie homolog isoform X6  
[Orycteropus afer afer]. 85..99

MDPGQQPPPQVPVQGGQPPTQPPQGDPPSRTGQQAPPGSQAAPQAPPAGHQIVHVRGDSETDLEALF  
NAVMPKNTANVPPTVPMRLRKLKLPDSFFKPPPEPKSHSRQVSTDAGTAGALAPQHVAHSSPASLQLGAVSPGTLSP  
TGVVSGPAAAPTAQHLRQSSFEIPDDVPLPAGWEMAKTSSGQRYFLNHIDQTTTWQDPRKAMLSQMNVTAPTSP  
VQQSMINSASAINQRISQSAPVKQPPPLAPQSPQGGVMGGGNSNQQQQMRLQQLQMEKERLRLKQOELLRQVRPQ  
AMRNINPSTANSPKCQELALRSQLPTLEQDGGTQNPVSSPGMSQELRTMTTNSDPFLNSGTYHSRDESTDSGLS

MSSYSVPRTPDDFLNSVDEMMDTGTINQSTLPSQQNRFPDYLEAIPGTNVDLGTLEGDGMNIEGEEELMPSLQEQAL  
SSDILNDMESVLAATKLDKESFLTWL PMRLRKLKLPDSFFKPP

rs:XP\_007944212 [XP\_007944212] PREDICTED: yorkie homolog isoform X7  
[Orycteropus afer afer]. 85..99

MDPGQQPPPQVPVQGGQPPTQPPQGDPPSRTGQQAPPGSQAAPQAPPAGHQIVHVRGDSETDLEALF  
NAVMNPKTANVPPTVPMRLRKLKLPDSFFKPPPEPKSHSRQVSTDAGTAGALAPQHVRHSSPASLQLGAVSPGTLSP  
TGVVSGPAAAPTAQHRLRQSSFEIPDDVPLPAGWEMAKTSSGQRYFLNHIDQTTTQWQDPRKAMLSQMNVTAPTSPP  
VQQSMINSASAINQRISQSAPVKQPPPLAPQSPQGGVMGGGNSNQQQMRLQQLQMEKERLRLKQQELLRQAMRN  
INPSTANSPKCQELALRSQLEQDGGTQNPVSSPGMSQELRTMTTNSSDPFLNSGTYHSRDESTDSGLSMSSY  
SVPRTPDDFLNSVDEMMDTGTINQSTLPSQQNRFPDYLEAIPGTNVDLGTLEGDGMNIEGEEELMPSLQEQALSSDI  
LNDMESVLAATKLDKESFLTWL PMRLRKLKLPDSFFKPP

rs:XP\_007944213 [XP\_007944213] PREDICTED: yorkie homolog isoform X8  
[Orycteropus afer afer]. 85..99

MDPGQQPPPQVPVQGGQPPTQPPQGDPPSRTGQQAPPGSQAAPQAPPAGHQIVHVRGDSETDLEALF  
NAVMNPKTANVPPTVPMRLRKLKLPDSFFKPPPEPKSHSRQVSTDAGTAGALAPQHVRHSSPASLQLGAVSPGTLSP  
TGVVSGPAAAPTAQHRLRQSSFEIPDDVPLPAGWEMAKTSSGQRYFLNHIDQTTTQWQDPRKAMLSQMNVTAPTSPP  
VQQSMINSASAINQRISQSAPVKQPPPLAPQSPQGGVMGGGNSNQQQMRLQQLQMEKERLRLKQQELLRQVRPQ  
ELALRSQLEQDGGTQNPVSSPGMSQELRTMTTNSSDPFLNSGTYHSRDESTDSGLSMSSYSVPRTPDDFLNS  
VDEMMDTGTINQSTLPSQQNRFPDYLEAIPGTNVDLGTLEGDGMNIEGEEELMPSLQEQALSSDILNDMESVLAATK  
LDKESFLTWL PMRLRKLKLPDSFFKPP

rs:XP\_007944214 [XP\_007944214] PREDICTED: yorkie homolog isoform X9  
[Orycteropus afer afer]. 85..99

MDPGQQPPPQVPVQGGQPPTQPPQGDPPSRTGQQAPPGSQAAPQAPPAGHQIVHVRGDSETDLEALF  
NAVMNPKTANVPPTVPMRLRKLKLPDSFFKPPPEPKSHSRQVSTDAGTAGALAPQHVRHSSPASLQLGAVSPGTLSP  
TGVVSGPAAAPTAQHRLRQSSFEIPDDVPLPAGWEMAKTSSGQRYFLNHIDQTTTQWQDPRKAMLSQMNVTAPTSPP  
VQQSMINSASAINQRISQSAPVKQPPPLAPQSPQGGVMGGGNSNQQQMRLQQLQMEKERLRLKQQELLRQELAL  
RSQLEQDGGTQNPVSSPGMSQELRTMTTNSSDPFLNSGTYHSRDESTDSGLSMSSYSVPRTPDDFLNSVDEM  
DTGTINQSTLPSQQNRFPDYLEAIPGTNVDLGTLEGDGMNIEGEEELMPSLQEQALSSDILNDMESVLAATKLDKE  
SFLTWL PMRLRKLKLPDSFFKPP

rs:XP\_007944428 [XP\_007944428] PREDICTED: protein **FAM181B** [Orycteropus  
afer afer]. 221..235

MAVQAALLSPHPFVSGFAGAPDGLGVAFGALDKGCCFEDDETRAPAGALLAEAEGGDVREATRDLLSF  
IDSASSNIKLALDKPGKSKRKVNHRKYLQKQIKRCSGLMGAAAPPSPGADTPAKRQPVAPSAQTFVAVPAHCK  
AAPRREATQAAAAASLQSRSLAALFDSLHHPAGDEPAGGAVVAPAAGVGGTSAGGAGGEAAGPVGGAVAPGTRK  
VPLRARNLPPSFFTEPSRAGGGVCGPSGSGMSLGLDLDKADAMEFFELLGPDYCPSTEAGVLLAAEPLDGFPPAGA  
SALRGPPELEPGLFEPVPPAMVGSLLYPEPWSAPGPPTKKMSLAAARGGLTLNEPLRPLYPAAEDSPGEDDRHGHL  
ASFTPFPPDCALPQPPHQVSYDYSAGYSRPAYSSSLWRPDPGVWEEVPEERHRD PLRARNLPPSFFTEP

rs:XP\_008018492 [XP\_008018492] PREDICTED: protein **FAM181B** [Chlorocebus  
sabaeus].>rs:XP\_005579266 [XP\_005579266] PREDICTED: protein **FAM181B** [Macaca  
fascicularis].>rs:XP\_011717516 [XP\_011717516] protein **FAM181B** [Macaca  
nemestrina]. 221..235

MAVQAALLSTHPFVPGFVGGSPDGLGGAFGALDKGCCFEDDETGAPAGALLSGAEGGDVREATRDLLSF  
IDSASSNIKLALDKPGKSKRKVNHRKYLQKQIKRCSGLMGAVPPGPPSPSAADTPAKRPLAAPSAPTVAAPAHGK  
AVPREASQAAAAASLQSRSLAALFDSLHHPVGGAEPAAGAVAAPVAGLGGAGTGGAGGDAAGPAGATAVPGARK  
VPLRARNLPPSFFTEPSRAGGGVCGPSGPDVSLGDLKGAEEVFFELLGPDYAGTEAAVLLAAEPLDVFPAGA  
SVLRGPPELESGLFDPAPAVVGNLLYPEPWSVPGCPPTKKPPLTAPRGGLTLNEPLRPLYPAAADSPPGEDGPGH  
LASFSPFFPDCALPPPPPHQVSYDYSAGYSRNAYSSSLWRPDAVWEGAPGEEGAHRD PLRARNLPPSFFTEP

rs:XP\_008018830 [XP\_008018830] PREDICTED: yorkie homolog isoform X1  
[Chlorocebus sabaeus].>rs:XP\_011927468 [XP\_011927468] PREDICTED:  
transcriptional coactivator YAP1 isoform X1 [Cerocebus  
atys].>rs:XP\_005579501 [XP\_005579501] PREDICTED: transcriptional  
coactivator YAP1 isoform X1 [Macaca fascicularis]. 85..99

MDPGQQPPPQPAPQGGQPAPQPPQGGPPSGPQPAPAATQAAPQAPPAGHQIVHVRGDSETDLEALF

NAVMNPKTANVPQTVPMRLRKL PDSFFKPPPEPKSHSRQASTDAGTAGALTPQHVRHSSPASLQLGAVSPGTLTP  
TGVVSGPAATPTAQHLRQSSFEIPDDVPLPAGWEMAKTSSGQRYFLNHIDQTTTWDPRKAMLSQMNVTAPTSP  
VQQNMMNSASGPLPDGWEQAMTQDGEIYYINHKNKTTSWLDPRLDPRFGKAMNQRISSAPVKQPPPLAPQSPQG  
GVMGGSNSNQQQMRLQQLQMEKERLRLKQOELLRQVRPQAMRNINPSTANS PKQELALRSQLPTLEQDGGTQN  
PVSSPGMSQELRTMTTNSSDPFLNSGTYHSRDESTDSGLSMSSYSVPRTPDDFLNSVDEMDTGD TINQSTLPSQQ  
NRFPDYLEAIPGTNVDLGTLEGDGMNIEGEELMPSLQEQALSSDILNDMESVLAATKLDKESFLTWL  
PMRLRKL PDSFFKPP

rs:XP\_008018831 [XP\_008018831] PREDICTED: yorkie homolog isoform X2  
[Chlorocebus sabaesus].>rs:XP\_011927470 [XP\_011927470] PREDICTED:  
transcriptional coactivator YAP1 isoform X2 [Cercopithecus  
atys].>rs:XP\_005579502 [XP\_005579502] PREDICTED: transcriptional  
coactivator YAP1 isoform X2 [Macaca fascicularis]. 85..99

MDPGQQPPPPQAPQGGQPPAQQPPQGGQPPSGPGQPAPAATQAAPQAPPAGHQIVHVRGDSETDLEALF  
NAVMNPKTANVPQTVPMRLRKL PDSFFKPPPEPKSHSRQASTDAGTAGALTPQHVRHSSPASLQLGAVSPGTLTP  
TGVVSGPAATPTAQHLRQSSFEIPDDVPLPAGWEMAKTSSGQRYFLNHIDQTTTWDPRKAMLSQMNVTAPTSP  
VQQNMMNSASGPLPDGWEQAMTQDGEIYYINHKNKTTSWLDPRLDPRFAMNQRISSAPVKQPPPLAPQSPGGV  
MGGNSNSNQQQMRLQQLQMEKERLRLKQOELLRQVRPQAMRNINPSTANS PKQELALRSQLPTLEQDGGTQNPV  
SSPGMSQELRTMTTNSSDPFLNSGTYHSRDESTDSGLSMSSYSVPRTPDDFLNSVDEMDTGD TINQSTLPSQQNR  
FPDYLEAIPGTNVDLGTLEGDGMNIEGEELMPSLQEQALSSDILNDMESVLAATKLDKESFLTWL  
PMRLRKL PDSFFKPP

rs:XP\_008018833 [XP\_008018833] PREDICTED: yorkie homolog isoform X3  
[Chlorocebus sabaesus].>rs:XP\_011927471 [XP\_011927471] PREDICTED:  
transcriptional coactivator YAP1 isoform X3 [Cercopithecus  
atys].>rs:XP\_005579503 [XP\_005579503] PREDICTED: transcriptional  
coactivator YAP1 isoform X3 [Macaca fascicularis]. 85..99

MDPGQQPPPPQAPQGGQPPAQQPPQGGQPPSGPGQPAPAATQAAPQAPPAGHQIVHVRGDSETDLEALF  
NAVMNPKTANVPQTVPMRLRKL PDSFFKPPPEPKSHSRQASTDAGTAGALTPQHVRHSSPASLQLGAVSPGTLTP  
TGVVSGPAATPTAQHLRQSSFEIPDDVPLPAGWEMAKTSSGQRYFLNHIDQTTTWDPRKAMLSQMNVTAPTSP  
VQQNMMNSASGPLPDGWEQAMTQDGEIYYINHKNKTTSWLDPRLDPRFGKAMNQRISSAPVKQPPPLAPQSPQG  
GVMGGSNSNSNQQQMRLQQLQMEKERLRLKQOELLRQAMRNINPSTANS PKQELALRSQLPTLEQDGGTQNPVSS  
PGMSQELRTMTTNSSDPFLNSGTYHSRDESTDSGLSMSSYSVPRTPDDFLNSVDEMDTGD TINQSTLPSQQNRFP  
DYLEAIPGTNVDLGTLEGDGMNIEGEELMPSLQEQALSSDILNDMESVLAATKLDKESFLTWL  
PMRLRKL PDSFFKPP

rs:XP\_008018834 [XP\_008018834] PREDICTED: yorkie homolog isoform X4  
[Chlorocebus sabaesus].>rs:XP\_011927472 [XP\_011927472] PREDICTED:  
transcriptional coactivator YAP1 isoform X4 [Cercopithecus  
atys].>rs:XP\_005579504 [XP\_005579504] PREDICTED: transcriptional  
coactivator YAP1 isoform X4 [Macaca fascicularis]. 85..99

MDPGQQPPPPQAPQGGQPPAQQPPQGGQPPSGPGQPAPAATQAAPQAPPAGHQIVHVRGDSETDLEALF  
NAVMNPKTANVPQTVPMRLRKL PDSFFKPPPEPKSHSRQASTDAGTAGALTPQHVRHSSPASLQLGAVSPGTLTP  
TGVVSGPAATPTAQHLRQSSFEIPDDVPLPAGWEMAKTSSGQRYFLNHIDQTTTWDPRKAMLSQMNVTAPTSP  
VQQNMMNSASGPLPDGWEQAMTQDGEIYYINHKNKTTSWLDPRLDPRFAMNQRISSAPVKQPPPLAPQSPGGV  
MGGNSNSNQQQMRLQQLQMEKERLRLKQOELLRQAMRNINPSTANS PKQELALRSQLPTLEQDGGTQNPVSSPG  
MSQELRTMTTNSSDPFLNSGTYHSRDESTDSGLSMSSYSVPRTPDDFLNSVDEMDTGD TINQSTLPSQQNRFPDY  
LEAIPGTNVDLGTLEGDGMNIEGEELMPSLQEQALSSDILNDMESVLAATKLDKESFLTWL  
PMRLRKL PDSFFKPP

rs:XP\_008018835 [XP\_008018835] PREDICTED: yorkie homolog isoform X5  
[Chlorocebus sabaesus].>rs:XP\_011927473 [XP\_011927473] PREDICTED:  
transcriptional coactivator YAP1 isoform X5 [Cercopithecus  
atys].>rs:XP\_005579505 [XP\_005579505] PREDICTED: transcriptional  
coactivator YAP1 isoform X5 [Macaca fascicularis]. 85..99

MDPGQQPPPPQAPQGGQPPAQQPPQGGQPPSGPGQPAPAATQAAPQAPPAGHQIVHVRGDSETDLEALF  
NAVMNPKTANVPQTVPMRLRKL PDSFFKPPPEPKSHSRQASTDAGTAGALTPQHVRHSSPASLQLGAVSPGTLTP  
TGVVSGPAATPTAQHLRQSSFEIPDDVPLPAGWEMAKTSSGQRYFLNHIDQTTTWDPRKAMLSQMNVTAPTSP

VQQNMMNSASGPLPDGWEQAMTQDGEIYYINHKNKTTSWLDPRLDPRFGKAMNQRISQSAPVKQPPPLAPQSPQG  
GVMGGSNSNQOQMRLLQQLQMEKERLRLKQOELLRQVRPQELALRSQLPTLEQDGGTQNPVSSPGMSQELRTMTT  
NSSDPFLNSGTYHSRDESTDSGLSMSSYSVPRTPDDFLNSVDEMMDTGDITINQSTLPSQQNRFPDYLEAIPGTNVDL  
LGTLEGDGMNIEGEEELMPSLQEQALSSDILNDMESVLAATKLDKESFLTWL PMRLRKLPSDFFKPP

rs:XP\_008018836 [XP\_008018836] PREDICTED: yorkie homolog isoform X6  
[Chlorocebus sabaeus].>rs:XP\_011927474 [XP\_011927474] PREDICTED:  
transcriptional coactivator YAP1 isoform X6 [Cercopithecus  
atys].>rs:XP\_005579506 [XP\_005579506] PREDICTED: transcriptional  
coactivator YAP1 isoform X6 [Macaca fascicularis]. 85..99

MDPGQQPPPPQAPQGGQPPAQQPPQGGQPPSGPGQPAPAATQAAPQAPPAGHQIVHVRGDSETDLEALF  
NAVMNPKTANVPQTVPMRLRKLPSDFFKPPEPKSHSRQASTDAGTAGALTPQHVRHSSPASLQLGAVSPGTLTP  
TGVVSGPAATPTAQHLRQSSFEIPDDVPLPAGWEMAKTSSGQRYFLNHIDQTTTWQDPRKAMLSQMNVTAPTSPP  
VQQNMMNSASGPLPDGWEQAMTQDGEIYYINHKNKTTSWLDPRLDPRFAMNQRISQSAPVKQPPPLAPQSPQGGV  
MGGNSNSNQOQMRLLQQLQMEKERLRLKQOELLRQVRPQELALRSQLPTLEQDGGTQNPVSSPGMSQELRTMTTNS  
SDPFLNSGTYHSRDESTDSGLSMSSYSVPRTPDDFLNSVDEMMDTGDITINQSTLPSQQNRFPDYLEAIPGTNVDL  
TLEGDGMNIEGEEELMPSLQEQALSSDILNDMESVLAATKLDKESFLTWL PMRLRKLPSDFFKPP

rs:XP\_008018837 [XP\_008018837] PREDICTED: yorkie homolog isoform X7  
[Chlorocebus sabaeus].>rs:XP\_011927476 [XP\_011927476] PREDICTED:  
transcriptional coactivator YAP1 isoform X7 [Cercopithecus  
atys].>rs:XP\_005579507 [XP\_005579507] PREDICTED: transcriptional  
coactivator YAP1 isoform X7 [Macaca fascicularis]. 85..99

MDPGQQPPPPQAPQGGQPPAQQPPQGGQPPSGPGQPAPAATQAAPQAPPAGHQIVHVRGDSETDLEALF  
NAVMNPKTANVPQTVPMRLRKLPSDFFKPPEPKSHSRQASTDAGTAGALTPQHVRHSSPASLQLGAVSPGTLTP  
TGVVSGPAATPTAQHLRQSSFEIPDDVPLPAGWEMAKTSSGQRYFLNHIDQTTTWQDPRKAMLSQMNVTAPTSPP  
VQQNMMNSASGPLPDGWEQAMTQDGEIYYINHKNKTTSWLDPRLDPRFGKAMNQRISQSAPVKQPPPLAPQSPQG  
GVMGGSNSNQOQMRLLQQLQMEKERLRLKQOELLRQELALRSQLPTLEQDGGTQNPVSSPGMSQELRTMTTNS  
PFLNSGTYHSRDESTDSGLSMSSYSVPRTPDDFLNSVDEMMDTGDITINQSTLPSQQNRFPDYLEAIPGTNVDL  
EGDGMNIEGEEELMPSLQEQALSSDILNDMESVLAATKLDKESFLTWL PMRLRKLPSDFFKPP

rs:XP\_008018838 [XP\_008018838] PREDICTED: yorkie homolog isoform X8  
[Chlorocebus sabaeus].>rs:XP\_011927477 [XP\_011927477] PREDICTED:  
transcriptional coactivator YAP1 isoform X8 [Cercopithecus  
atys].>rs:XP\_005579508 [XP\_005579508] PREDICTED: transcriptional  
coactivator YAP1 isoform X8 [Macaca fascicularis]. 85..99

MDPGQQPPPPQAPQGGQPPAQQPPQGGQPPSGPGQPAPAATQAAPQAPPAGHQIVHVRGDSETDLEALF  
NAVMNPKTANVPQTVPMRLRKLPSDFFKPPEPKSHSRQASTDAGTAGALTPQHVRHSSPASLQLGAVSPGTLTP  
TGVVSGPAATPTAQHLRQSSFEIPDDVPLPAGWEMAKTSSGQRYFLNHIDQTTTWQDPRKAMLSQMNVTAPTSPP  
VQQNMMNSASGPLPDGWEQAMTQDGEIYYINHKNKTTSWLDPRLDPRFAMNQRISQSAPVKQPPPLAPQSPQGGV  
MGGNSNSNQOQMRLLQQLQMEKERLRLKQOELLRQELALRSQLPTLEQDGGTQNPVSSPGMSQELRTMTTNS  
LNSGTYHSRDESTDSGLSMSSYSVPRTPDDFLNSVDEMMDTGDITINQSTLPSQQNRFPDYLEAIPGTNVDL  
DGMNIEGEEELMPSLQEQALSSDILNDMESVLAATKLDKESFLTWL PMRLRKLPSDFFKPP

rs:XP\_008018839 [XP\_008018839] PREDICTED: yorkie homolog isoform X9  
[Chlorocebus sabaeus].>rs:XP\_011927478 [XP\_011927478] PREDICTED:  
transcriptional coactivator YAP1 isoform X9 [Cercopithecus  
atys].>rs:XP\_005579509 [XP\_005579509] PREDICTED: transcriptional  
coactivator YAP1 isoform X9 [Macaca fascicularis]. 85..99

MDPGQQPPPPQAPQGGQPPAQQPPQGGQPPSGPGQPAPAATQAAPQAPPAGHQIVHVRGDSETDLEALF  
NAVMNPKTANVPQTVPMRLRKLPSDFFKPPEPKSHSRQASTDAGTAGALTPQHVRHSSPASLQLGAVSPGTLTP  
TGVVSGPAATPTAQHLRQSSFEIPDDVPLPAGWEMAKTSSGQRYFLNHIDQTTTWQDPRKAMLSQMNVTAPTSPP  
VQQNMMNSASAMNQRISQSAPVKQPPPLAPQSPQGGVMMGGSNSNSNQOQMRLLQQLQMEKERLRLKQOELLRQVRPQ  
AMRNINPSTANSKPCQELALRSQLPTLEQDGGTQNPVSSPGMSQELRTMTTNS  
SDPFLNSGTYHSRDESTDSGLSMSSYSVPRTPDDFLNSVDEMMDTGDITINQSTLPSQQNRFPDYLEAIPGTNVDL  
LGTLEGDGMNIEGEEELMPSLQEQALSSDILNDMESVLAATKLDKESFLTWL PMRLRKLPSDFFKPP

rs:XP\_008018840 [XP\_008018840] PREDICTED: yorkie homolog isoform X10  
[Chlorocebus sabaeus].>rs:XP\_011927479 [XP\_011927479] PREDICTED:

transcriptional coactivator YAP1 isoform X10 [Cercopithecus atys].>rs:XP\_005579510 [XP\_005579510] PREDICTED: transcriptional coactivator YAP1 isoform X10 [Macaca fascicularis]. 85..99

MDPGQQPPPPQAPQGGQPPAQPPQGGQPPSGPGQPAPAATQAAPQAPPAGHQIVHVRGDSETDLEALF  
NAVMPKNTANVPQTVPMRLRKLKLPDSFFKPPPEPKSHSRQASTDAGTAGALTPQHVRHSSPASLQLGAVSPGTLTP  
TGVVSGPAATPTAQHLRQSSFEIPDDVPLPAGWEMAKTSSGQRYFLNHIDQTTTWQDPRKAMLSQMNVTAPTSPP  
VQQNMMNSASAMNQRIQSAPVKQPPPLAPQSPQGGVMGGSNSNQQQMRLQQLQMEKERLRLKQQEELLRQAMRN  
INPSTANSKQELALRSQLPPTLEQDGGTQNPVSSPGMSQELRTMTTNSSDPFLNSGTYHSRDESTDSGLSMSSY  
SVPRTPDFFLNSVDEMGTGDTINQSTLPSQQNRFPDYLEAIPGTNVDLGTLEGDMNIEGEEELMPSLQEQALSSDI  
LNDMESVLAATKLDKESFLTWL PMRLRKLKLPDSFFKPP

rs:XP\_008018841 [XP\_008018841] PREDICTED: yorkie homolog isoform X11 [Chlorocebus sabaeus].>rs:XP\_011927480 [XP\_011927480] PREDICTED: transcriptional coactivator YAP1 isoform X11 [Cercopithecus atys].>rs:XP\_005579511 [XP\_005579511] PREDICTED: transcriptional coactivator YAP1 isoform X11 [Macaca fascicularis]. 85..99

MDPGQQPPPPQAPQGGQPPAQPPQGGQPPSGPGQPAPAATQAAPQAPPAGHQIVHVRGDSETDLEALF  
NAVMPKNTANVPQTVPMRLRKLKLPDSFFKPPPEPKSHSRQASTDAGTAGALTPQHVRHSSPASLQLGAVSPGTLTP  
TGVVSGPAATPTAQHLRQSSFEIPDDVPLPAGWEMAKTSSGQRYFLNHIDQTTTWQDPRKAMLSQMNVTAPTSPP  
VQQNMMNSASAMNQRIQSAPVKQPPPLAPQSPQGGVMGGSNSNQQQMRLQQLQMEKERLRLKQQEELLRQVRPQ  
ELALRSQLPPTLEQDGGTQNPVSSPGMSQELRTMTTNSSDPFLNSGTYHSRDESTDSGLSMSSYSVPRTPDFFLNS  
VDEMGTGDTINQSTLPSQQNRFPDYLEAIPGTNVDLGTLEGDMNIEGEEELMPSLQEQALSSDI LNDMESVLAATK  
LDKESFLTWL PMRLRKLKLPDSFFKPP

rs:XP\_008018842 [XP\_008018842] PREDICTED: yorkie homolog isoform X12 [Chlorocebus sabaeus].>rs:XP\_011927482 [XP\_011927482] PREDICTED: transcriptional coactivator YAP1 isoform X12 [Cercopithecus atys].>rs:XP\_005579512 [XP\_005579512] PREDICTED: transcriptional coactivator YAP1 isoform X12 [Macaca fascicularis]. 85..99

MDPGQQPPPPQAPQGGQPPAQPPQGGQPPSGPGQPAPAATQAAPQAPPAGHQIVHVRGDSETDLEALF  
NAVMPKNTANVPQTVPMRLRKLKLPDSFFKPPPEPKSHSRQASTDAGTAGALTPQHVRHSSPASLQLGAVSPGTLTP  
TGVVSGPAATPTAQHLRQSSFEIPDDVPLPAGWEMAKTSSGQRYFLNHIDQTTTWQDPRKAMLSQMNVTAPTSPP  
VQQNMMNSASAMNQRIQSAPVKQPPPLAPQSPQGGVMGGSNSNQQQMRLQQLQMEKERLRLKQQEELLRQELAL  
RSQLPPTLEQDGGTQNPVSSPGMSQELRTMTTNSSDPFLNSGTYHSRDESTDSGLSMSSYSVPRTPDFFLNSVDEM  
DTGDTINQSTLPSQQNRFPDYLEAIPGTNVDLGTLEGDMNIEGEEELMPSLQEQALSSDI LNDMESVLAATKLDKE  
SFLTWL PMRLRKLKLPDSFFKPP

rs:XP\_008566209 [XP\_008566209] PREDICTED: yorkie homolog isoform X1 [Galeopterus variegatus]. 13..27

MNPKTANVPQTVPMRLRKLKLPDSFFKPPPEPKSHSRQASTDAGTAGALTPQHVRHSSPASLQLGAVSPGT  
LTPTGVVSGPAAAPTAQHLRQSSFEIPDDVPLPAGWEMAKTSSGQRYFLNHIDQTTTWQDPRKAMLSQMNVTAPTS  
SPPVQNNMMNSASGPLPDGWEQAMTQDGEIYYINHKNKTTSWLDPRLDPRFGKAMNQRIQSAPVKQPPPLAPQS  
PQGGVMGGSNSNQQQMRLQQLQMEKERLRLKQQEELLRQVRPQELALRSQLPPTLEQDGGTQNPVSSPGMSQELRT  
MTTNSSDPFLNSGTYHSRDESTDSGLSMSSYSVPRTPDFFLNSVDEMGTGDTINQSTLPSQQNRFPDYLEAIPGT  
NVDLGTLEGDMNIEGEEELMPSLQEQALSSDI LNDMESVLAATKLDKESFLTWLPMRLRKLKLPDSFFKPP

rs:XP\_008566210 [XP\_008566210] PREDICTED: yorkie homolog isoform X2 [Galeopterus variegatus]. 13..27

MNPKTANVPQTVPMRLRKLKLPDSFFKPPPEPKSHSRQASTDAGTAGALTPQHVRHSSPASLQLGAVSPGT  
LTPTGVVSGPAAAPTAQHLRQSSFEIPDDVPLPAGWEMAKTSSGQRYFLNHIDQTTTWQDPRKAMLSQMNVTAPTS  
SPPVQNNMMNSASGPLPDGWEQAMTQDGEIYYINHKNKTTSWLDPRLDPRFAMNQRIQSAPVKQPPPLAPQSPQ  
GGVMGGSNSNQQQMRLQQLQMEKERLRLKQQEELLRQELALRSQLPPTLEQDGGTQNPVSSPGMSQELRTMTTNS  
SDPFLNSGTYHSRDESTDSGLSMSSYSVPRTPDFFLNSVDEMGTGDTINQSTLPSQQNRFPDYLEAIPGTNVDLGT  
LEGDMNIEGEEELMPSLQEQALSSDI LNDMESVLAATKLDKESFLTWLPMRLRKLKLPDSFFKPP

rs:XP\_008585279 [XP\_008585279] PREDICTED: protein **FAM181A** [Galeopterus variegatus].>rs:XP\_008585280 [XP\_008585280] PREDICTED: protein **FAM181A** [Galeopterus variegatus]. 129..143

MASDSVVKMLLNFVNASSDIKAALDKSAPCRRSVDHRKYLQKQLKRFSQKYSRLPRGLPSRAAEPLHK

RGPEDRPGRLPLDSGPDSSPGGGGGCKERALGNPYREECLSKEQTLQGQNPEAARPGQVPMRKRQLPASFWEEP  
PTHSCPMGLEGLGPREGTPYEGKKNCKGLETLPETAPVPMSPRALAEKEPLKMPGVSLVGRVNAWSCPFQYH  
GQPIYPGGPVLQSPVNLGAWRKSVPFPGDLAYFCKDQVDSLQKQVYRPVVLKPIPTKAMPFPVFNVFGYL  
PMRKRQLPASFWEEP

rs:XP\_013106141 [XP\_013106141] PREDICTED: transcriptional coactivator  
yorkie [Stomoxys calcitrans].>tr:A0A1I8NXU6\_STOCA [A0A1I8NXU6] SubName:  
Full=Uncharacterized protein {ECO:0000313|VectorBase:SCAU003030-PA};  
65..79

MSLSKSSASDDANKCSVKTDESTSAASKSSINLVVRNYQNSDENLQALFDSVLNPSESNRPLQVPFRMR  
KLPNSFFTTPAASPKSPTVSHSRANSVDSAYDCGSQPNINQTSVASSLSLQTPAAVQAQQQSTNAINTQPTAPS  
TTAAQAEPRLQICHSTRAHSSPASLQQTYIHGNVADDAAPPFLQQQGDRGGSSTSTSAAPGFPNNLIGYNAAAAA  
AGLNASNILGLSGAGASVPLQTYHMKQRSYDVISPIQLQNELGLPLPGWEQAKTNDGQIYYLNHTTKTTQWEDPR  
TQFKQQALNAVSNTRATAKVNQTDNILASSNLGLPLEGWEQALTETGEVYFINHIDRTTSTWNPRLNDRPFL  
IQKELKPKTEMSVWNTDIDKSDIFKQKSRQKSLNKNPISLHMDPFLSGDNHARQESSDGLSLSSNSFAVNP  
FITHMDNSMDCISENGSIIDNLDLTTQLNDNIIMINDVLNPSNKPNDLEWYKLN PFRMRKLPNSFFTTP

rs:XP\_008941138 [XP\_008941138] PREDICTED: LOW QUALITY PROTEIN: protein  
**FAM181A** [Merops nubicus]. 127..141

MASDSEVKTLNLFVNLASSDIKAALDKSAPCRRSVDHRKYLQKQLKRFSQKYSRIPRCHPSKVPECGWR  
RGAEFRGHGPPQPEADPSPHGGATSEKVLQTAEEVESPTGERVLQEQNLEATRPDQLPMRKRQLPASFWEEP  
QSLARAFSTGPEGLPAPRDPPEYEGKTKRSLDAASPEPPEPASRAGEKDPAEVLSGRVGTWTCPPFCPGP  
VYQPPGALPPSPFPELGLWRKGAATLPAEVPHFCKEASGTGQKLYRPVVLKPIPTKPAIPPIFNVFGYL  
PMRKRQLPASFWEEP

rs:XP\_009044945 [XP\_009044945] hypothetical protein LOTGIDRAFT\_136317  
[Lottia gigantea].>tr:V4BET5\_LOTGI [V4BET5] SubName: Full=Uncharacterized  
protein {ECO:0000313|EMBL:ESP04342.1}; 43..57

MSQDRSERKGSQIVHVRENSDSDMDALFSYGLNPTPDSNKSIPLRMRNLPASFFQPPEPHQAGKEGSD  
STGYSSNPTSTPNFVSNHTRVRSSPASLSQGQTLSTAPPPPCSQHVRQHSYDLAEELPPGWSIGVTHVGQRYF  
LK PLRMRNLPASFFQPP

rs:XP\_009047301 [XP\_009047301] hypothetical protein LOTGIDRAFT\_230552  
[Lottia gigantea].>tr:V4AX52\_LOTGI [V4AX52] SubName: Full=Uncharacterized  
protein {ECO:0000313|EMBL:ESP02143.1}; 119..133

MDIQTAMSDFGQSDETVLLNFVDMASSNIKMALDRPSKSKRRVNRKYLQKQLKRCDSKPKGGKDDLS  
KTVAKSSRKETHQIGLQIKSLQALFDPRTLHDQHRHDGQQRRTTFNLPKAPMRARNLPASFFSEPSSGKNNVGLS  
FVQVDAMSTMDANSQMCTLPTDTLESILGHNDLNELLSGTWPETSRESVRTPGSDGSDVDTCCSSRSFSDSDSFCAT  
SPNPLTRSPSWSPCLNSVSANSPPFIQEDTPNPLLPYANLNDNFQHEFDVNYRNIIEPEQTQFGQSGLPTFPQA  
FTRTNSGYHSTINSWQQYPLEPPFTF PMRARNLPASFFSEP

rs:XP\_009048055 [XP\_009048055] hypothetical protein LOTGIDRAFT\_157604  
[Lottia gigantea].>tr:V4B1Y6\_LOTGI [V4B1Y6] SubName: Full=Uncharacterized  
protein {ECO:0000313|EMBL:ESP01421.1}; 201..215

MTTFQNLPRNPVYNGVPPSLLRKTFFQPVVYDSDLRFDHQIMDKFVDDDDFSDHDSHYSEDLDDFRFQL  
LNCPSGTNMTKQLLNADLVNNDIKKFFGPKKGSDDTCDIYADKWKTIKSGRERYRDLLRIAEGDNDLSKNGKD  
NSEYNQKIVDNRHTFSGRDLERLGLGPKLKFDRGLHGTNSERKTRTGRASKYESVPMHQRRFPDSFWRPSPNVT  
KRYPLYIPNTHVQNSPKPPDFSDLLETWTMAADSEFNADFSSDVNSPVESFVHRRL PMHQRRFPDSFWRPP

rs:XP\_009052896 [XP\_009052896] hypothetical protein LOTGIDRAFT\_159959  
[Lottia gigantea].>tr:V3ZYD2\_LOTGI [V3ZYD2] SubName: Full=Uncharacterized  
protein {ECO:0000313|EMBL:ESO96543.1}; 40..54

METFPLIKAQNTVLNDREGFQRLELPSRSLNVVTNHPSLPLRQRPLPASFWQEPNRQVLPPEEIFFPMC  
VDPLLQRSFMDQMLAYKLYMDSLQIPPISPLSSPYPFTEFLYGLKHRTSIPPKNKVPFPFDIRPPFIQPNGLHLE  
PTTKDTSVSVVKPIATKSQSLSRPGHRYHPFLPPK PLRQRPLPASFWQEP

rs:XP\_009058783 [XP\_009058783] hypothetical protein LOTGIDRAFT\_123177  
[Lottia gigantea].>tr:V3ZGV6\_LOTGI [V3ZGV6] SubName: Full=Uncharacterized  
protein {ECO:0000313|EMBL:ESO90458.1}; 168..182



MEKIPSPRINLDLNTLKSGLPLDSKGNKFQNFNSRSPRSEALTVLTLNLSSPTDSNISPASRSDSLSPAT  
SSSYATEHDHDYENIASPCSSTASGPTYVVRPPGFHHAQEILSSSVKIKKKKTSALFAHRESLRKREPTPPKKFE  
RHLFNLYKEELPMKTYFHFSEPLPMKLRALPQSFWQQPNQPHQVSPGNIFRVLPPLSIKDTGEDVTGKYFGQLCA  
MREILSGL PMKLRALPQSFWQQP

rs:XP\_009557523 [XP\_009557523] PREDICTED: protein **FAM181A** [Cuculus  
canorus]. 95..109

MASDSEVKTLNLFVNLASSDIKAALDKSAPCRRSVDHRKYLQKQLKRFSQKYSRIPRCHASKPPECSWR  
RGAEDRGRGPQPEAPDPSPHGPDQVPMRKRQLPASFWEEPRPAQTLPARAFPAGPDVLLAPRDSPSYEGKKSRS  
VEAAGPENPEPALCAGDKDPAGVLSGRVGAWTCCFPFCPGPGVFQPPSTLPLSPFPGLGLWRKSAAVLPAEVP  
HFCKEADGAGQKLYKPVVLKPIPTKPTVPPPIFNVFSYL PMRKRQLPASFWEEP

rs:XP\_009688058 [XP\_009688058] PREDICTED: protein **FAM181A** [Struthio  
camelus australis].>tr:A0A093GX64\_STRCA [A0A093GX64] SubName: Full=Protein  
**FAM181A** {ECO:0000313|EMBL:KfV74858.1}; 127..141

MASDSEVKTLNLFVNLASSDIKAALDKSAPCRRSVDHRKYLQKQLKRFSQKYSRIPRCHPSKSAECSVK  
RGVEDRSRGSQPEAADSSHHCRAPAEKVLRTAEVEETFSGEQVLQDQNPAAARPDQVPMRKRQLPASFWEEPRPA  
QSLLAKSFPVSLNGLPNSGDPLPYEGKKSRRSPEVASPESPPEPVQRGGEKDPKAPGPPVSSRVASWTCCFPFC  
PGQPLYQSPGALPPSFPGLGLWRKSTALPGEMQHFCKEADSTGQKLYRPVVLKPIPTKPAVPPPIFNVFGYI  
PMRKRQLPASFWEEP

rs:XP\_009694265 [XP\_009694265] PREDICTED: LOW QUALITY PROTEIN: protein  
**FAM181A** [Cariama cristata]. 124..138

MASDSEVKTLNLFVNLASSDIKAALDKSAPCRRSVDHRKYLQKQLKRFSQKYSRIPRCHPSKTPECGXG  
PGXXXXXXXXXAPQPPGGPATEKVLQTAEEEDSLSGERVLQEQNPEAARPDQVPMRKRQLPASFWEEPRPAQSL  
PARAFPTIPEGLPAPRDPPPYEAKKSKQSLDAVGPEPPEPVPHAGEKDPAGVLSGRVGAWTCCFPFCPGPGVYQ  
PPGPLPPSFPGLGLWRKSAALPAEVPFRFCKEADGTGQKLYRPVVLKPIPTKPAIPPPPIFNVFGYL  
PMRKRQLPASFWEEP

rs:XP\_020738154 [XP\_020738154] protein **FAM181B** [Odocoileus virginianus  
texanus]. 113..127

MAVQAALLSTHPFVFPFGFGGSPDGLGGAFGALDKGCCFEDEETGTPAGALLAGAESGDAREATRDLLSF  
IDSASSNIKLALDKPGKSKRKNVHRKYLQKQIKRCSGLNARKVPLRARNLPPSFFTEPSRPGGGGCGPSGPGVS  
LGDLEKGEAAEFFELLGPDYAGTEAGALLAAEPLDVFPAGAAVLRGPPPELEPGLFEPQAMVGSLLYPEPWSA  
PGGPATKKPPLPAPRGGLTLNEPLRSVYAAAADSPGGDDGPGLLASFAPFFSDCALPPAPPPPPQVSYDYSAGY  
SRSAFAGLWRPDGAWEGAPGEEGAPRD PLRARNLPPSFFTEP

rs:XP\_009905592 [XP\_009905592] PREDICTED: protein **FAM181A** [Picoides  
pubescens].>tr:A0A093H135\_DRYPU [A0A093H135] SubName: Full=Protein **FAM181A**  
{ECO:0000313|EMBL:KfV73095.1}; 127..141

MASDSEVKTLNLFVNLASSDIKAALDKSAPCRRSVDHRKYLQKQLKRFSQKYSRIPRCHPSKTPECGWR  
RGAEDRGRGPQPEPTDLSHGGAAAEMKLQTAEEVDSLTEHVLQEQNPEAARPDQVPMRKRQLPASFWEEPRPA  
QSLPTRAFFPSGPEGHPAPRDPPSYEGKKSQSADTAGPESPPEPAPHAGEKDPAGVLSGQVGAWTCCFPFCPGG  
VYQPPGALPPSFPGLGLWRKSAATMPVEMPHFCKEADGMGQKLYRPVVLKPIPTKPTVAPPIFNVFSYL  
PMRKRQLPASFWEEP

rs:XP\_009952313 [XP\_009952313] PREDICTED: protein **FAM181A** [Leptosomus  
discolor].>tr:A0A091P7F2\_LEPDC [A0A091P7F2] SubName: Full=Protein **FAM181A**  
{ECO:0000313|EMBL:KfQ03311.1}; 127..141

MASDSEVKTLNLFVNLASSDIKAALDKSAPCRRSVDHRKYLQKQLKRFSQKYSRIPRCHPSKPPECGWR  
RGAEDRGRGPQPEAPDPSHGGAAAEMKLQTAEEESLTERVQLQEQNPEAARPDQVPMRKRQLPASFWEEPRPA  
QSLLSRAFFPARPEGLPNPRDPPPYEGKKSWSFDAAGPESPHEPAPHAGEKDPAGVLSGRVGAWTCCFPFCPGG  
VYQPPGTLPPSFPGLGLWRKSAALPAEVPFHFCKEADGTGQKLYRPMVLKPIPTKPAVPPPIFNVFSYL  
PMRKRQLPASFWEEP

rs:XP\_010190511 [XP\_010190511] PREDICTED: protein **FAM181A** [Mesitornis  
unicolor].>tr:A0A091SJV8\_9GRUI [A0A091SJV8] SubName: Full=Protein **FAM181A**  
{ECO:0000313|EMBL:KfQ40565.1}; 127..141

MASDSEVKTLNLFVNLASSDIKAALDKSAPCRRSVDHRKYLQKQLKRFSQKYSRIPRCHPSKPSECGWR

RGAE DRGRGPQPEAPDPSPHGGAAAEKVLRTAEAEESLAREQVLQEQNPEAARPDQVPMRKRQLPASFWEEP RPT  
QNLQARAFPPGPEGLPAPRDP PPPYEGKSKRSSDTASPEIPPE SAPHIGE KDPAGVLSGRMGAWTCCFPFCTGPG  
VYQPPGALPPSPFPGLGLWRKSAAVLPAEVPHFCKEVDGTGQKLYRPVVLKPIPTKPAVPPPIFNVFSYL  
PMRKRQLPASFWEEP

rs:XP\_010361180 [XP\_010361180] PREDICTED: protein **FAM181B** [Rhinopithecus roxellana]. 221..235

MAGQAALLSTHPFVFPFGGGSPDGLGGAFGALDKCCFEDDETGAPAGALLSGAEGGDVREATRDLLSF  
IDSASSNIKLALDKPGKSKRKNHRKYLQKQIKRCSGLMGAVPPGPPSPSAADTPAKRPLAAPCAPTVAAPAHCK  
AVPREAAQAAAAASLQSRSLAALFDSLHRVPGGAEPAGGAVVAVVAGLGGAGTGGAGGDAVGPAGATAVPGARK  
VPLRARNLPPSFFTEPSRAGGGGCGPSGPDVSLGDLEKGAEEVEFFELLGPDYGAGTEAAVLLAAEPLDVFAPA  
SVLRGPPPELESGLFDPAPAVVGNLLYPEPWSVPGCPPTKKPPLTAPRGGLTLNEPLRPLYPAAADSPPGGEDGPGH  
LASFSPPFFPDCALPPPPPHQVSYDYSAGYSRNAYSSLWRPDGVWEGAPGEEGAHRD PLRARNLPPSFFTEP

rs:XP\_010377339 [XP\_010377339] PREDICTED: transcriptional coactivator YAP1 isoform X1 [Rhinopithecus roxellana].>rs:XP\_025212438 [XP\_025212438] transcriptional coactivator YAP1 isoform X1 [Theropithecus gelada]. 85..99

MDPGQQPPPQPAPQGGQPPAQPPQGGQPSGPGQPAPAATQAAPQAPPAGHQIVHVRGDSETDLEALF  
NAVMNPKTANVPQTVPMRLRKL PDSFFKPPPEPKSHSRQASTDAGTAGALTPQHVRHSSPASLQLGAVSPGTLTP  
TGVVSGPAATPTAQHLRQSSFEIPDDVPLPAGWEMAKTSSGQRYFLNHIDQTTTWQDPRKAMLSQMNVTAPTSPP  
VQQNMMNSASGPLPDGWEQAMTQDGEIYYINHKNKTT SWLDPRLDPRFGKAMNQRISQSAPVKQPPPLAPQSPQG  
GVMGGSNSNQQQMRLQQLQMEKERLRLKQOELLRQVRPQAMRNINPSTANSPKCQELALRSQLPTLEQDGGTQN  
PVSSPGMSQELRTMTTNSSDPFLNSGTYHSRDESTDSGLSMSSYSVPRTPDDFLNSVDEMDTGD TINQSTLPSQQ  
NRFPDYLEAIPGTNVDLGTLEGDGMNIEGEELMPSLQEQALSSDILNDMESVLAATKLDKESFLTWL  
PMRLRKL PDSFFKPP

rs:XP\_010377340 [XP\_010377340] PREDICTED: transcriptional coactivator YAP1 isoform X2 [Rhinopithecus roxellana].>rs:XP\_025212439 [XP\_025212439] transcriptional coactivator YAP1 isoform X2 [Theropithecus gelada].>tr:A0A2K6PTL4\_RHIRO [A0A2K6PTL4] SubName: Full=Yes associated protein 1 {ECO:0000313|Ensembl:ENSRROP00000019863}; 85..99

MDPGQQPPPQPAPQGGQPPAQPPQGGQPSGPGQPAPAATQAAPQAPPAGHQIVHVRGDSETDLEALF  
NAVMNPKTANVPQTVPMRLRKL PDSFFKPPPEPKSHSRQASTDAGTAGALTPQHVRHSSPASLQLGAVSPGTLTP  
TGVVSGPAATPTAQHLRQSSFEIPDDVPLPAGWEMAKTSSGQRYFLNHIDQTTTWQDPRKAMLSQMNVTAPTSPP  
VQQNMMNSASGPLPDGWEQAMTQDGEIYYINHKNKTT SWLDPRLDPRFAMNQRISQSAPVKQPPPLAPQSPQGV  
MGGNSNSNQQQMRLQQLQMEKERLRLKQOELLRQVRPQAMRNINPSTANSPKCQELALRSQLPTLEQDGGTQNPV  
SSPGMSQELRTMTTNSSDPFLNSGTYHSRDESTDSGLSMSSYSVPRTPDDFLNSVDEMDTGD TINQSTLPSQQNR  
FPDYLEAIPGTNVDLGTLEGDGMNIEGEELMPSLQEQALSSDILNDMESVLAATKLDKESFLTWL  
PMRLRKL PDSFFKPP

rs:XP\_010377341 [XP\_010377341] PREDICTED: transcriptional coactivator YAP1 isoform X3 [Rhinopithecus roxellana].>rs:XP\_025212440 [XP\_025212440] transcriptional coactivator YAP1 isoform X3 [Theropithecus gelada]. 85..99

MDPGQQPPPQPAPQGGQPPAQPPQGGQPSGPGQPAPAATQAAPQAPPAGHQIVHVRGDSETDLEALF  
NAVMNPKTANVPQTVPMRLRKL PDSFFKPPPEPKSHSRQASTDAGTAGALTPQHVRHSSPASLQLGAVSPGTLTP  
TGVVSGPAATPTAQHLRQSSFEIPDDVPLPAGWEMAKTSSGQRYFLNHIDQTTTWQDPRKAMLSQMNVTAPTSPP  
VQQNMMNSASGPLPDGWEQAMTQDGEIYYINHKNKTT SWLDPRLDPRFGKAMNQRISQSAPVKQPPPLAPQSPQG  
GVMGGSNSNQQQMRLQQLQMEKERLRLKQOELLRQAMRNINPSTANSPKCQELALRSQLPTLEQDGGTQNPVSS  
PGMSQELRTMTTNSSDPFLNSGTYHSRDESTDSGLSMSSYSVPRTPDDFLNSVDEMDTGD TINQSTLPSQQNRFP  
DYLEAIPGTNVDLGTLEGDGMNIEGEELMPSLQEQALSSDILNDMESVLAATKLDKESFLTWL  
PMRLRKL PDSFFKPP

rs:XP\_010377342 [XP\_010377342] PREDICTED: transcriptional coactivator YAP1 isoform X4 [Rhinopithecus roxellana].>rs:XP\_025212441 [XP\_025212441] transcriptional coactivator YAP1 isoform X4 [Theropithecus gelada]. 85..99

MDPGQQPPPQPAPQGGQPPAQPPQGGQPSGPGQPAPAATQAAPQAPPAGHQIVHVRGDSETDLEALF

NAVMPKKTANVPQTVPMRLRKLKLPDSFFKPPPEPKSHSRQASTDAGTAGALTPQHVRHSSPASLQLGAVSPGTLTP  
TGVVSGPAATPTAQHLRQSSFEIPDDVPLPAGWEMAKTSSGQRYFLNHIDQTTTWQDPRKAMLSQMNVTAPTSPP  
VQQNMMNSASGPLPDGWEQAMTQDGEIYYINHKNKTTSWLDPRLDPRFAMNQRIQSAPVKQPPPLAPQSPQGGV  
MGGNSNSNQQQQMRLQQLQMEKERLRLKQOELLRQAMRNINPSTANSKQELALRSQLPTLEQDGGTQNPVSSPG  
MSQELRTMTTNSSDPFLNSGTYHSRDESTDSGLSMSSYSVPRTPDDFLNSVDEMMDTGDITNQSTLPSQQNRFPDY  
LEAIPGTNVDLGTLEGDGMNIEGEEELMPSLQEQALSSDILNDMESVLAATKLDKESFLTWL  
PMRLRKLKLPDSFFKPP

rs:XP\_010377343 [XP\_010377343] PREDICTED: transcriptional coactivator  
YAP1 isoform X5 [Rhinopithecus roxellana].>rs:XP\_025212443 [XP\_025212443]  
transcriptional coactivator YAP1 isoform X5 [Theropithecus gelada].  
85..99

MDPGQQPPPPQAPQGGQPPAQQPPQGGQPSGPGQPAPAATQAAPQAPPAGHQIVHVRGDSETDLEALF  
NAVMPKKTANVPQTVPMRLRKLKLPDSFFKPPPEPKSHSRQASTDAGTAGALTPQHVRHSSPASLQLGAVSPGTLTP  
TGVVSGPAATPTAQHLRQSSFEIPDDVPLPAGWEMAKTSSGQRYFLNHIDQTTTWQDPRKAMLSQMNVTAPTSPP  
VQQNMMNSASGPLPDGWEQAMTQDGEIYYINHKNKTTSWLDPRLDPRFGKAMNQRIQSAPVKQPPPLAPQSPQG  
GVMGGNSNSNQQQQMRLQQLQMEKERLRLKQOELLRQVRPQELALRSQLPTLEQDGGTQNPVSSPGMSQELRTMTT  
NSSDPFLNSGTYHSRDESTDSGLSMSSYSVPRTPDDFLNSVDEMMDTGDITNQSTLPSQQNRFPDYLEAIPGTNVD  
LGTLEGDGMNIEGEEELMPSLQEQALSSDILNDMESVLAATKLDKESFLTWL PMRLRKLKLPDSFFKPP

rs:XP\_010377344 [XP\_010377344] PREDICTED: transcriptional coactivator  
YAP1 isoform X6 [Rhinopithecus roxellana].>rs:XP\_025212444 [XP\_025212444]  
transcriptional coactivator YAP1 isoform X6 [Theropithecus  
gelada].>tr:A0A2K6PTJ7\_RHIRO [A0A2K6PTJ7] SubName: Full=Yes associated  
protein 1 {ECO:0000313|Ensembl:ENSRROP00000019865}; 85..99

MDPGQQPPPPQAPQGGQPPAQQPPQGGQPSGPGQPAPAATQAAPQAPPAGHQIVHVRGDSETDLEALF  
NAVMPKKTANVPQTVPMRLRKLKLPDSFFKPPPEPKSHSRQASTDAGTAGALTPQHVRHSSPASLQLGAVSPGTLTP  
TGVVSGPAATPTAQHLRQSSFEIPDDVPLPAGWEMAKTSSGQRYFLNHIDQTTTWQDPRKAMLSQMNVTAPTSPP  
VQQNMMNSASGPLPDGWEQAMTQDGEIYYINHKNKTTSWLDPRLDPRFAMNQRIQSAPVKQPPPLAPQSPQGGV  
MGGNSNSNQQQQMRLQQLQMEKERLRLKQOELLRQVRPQELALRSQLPTLEQDGGTQNPVSSPGMSQELRTMTTNS  
SDPFLNSGTYHSRDESTDSGLSMSSYSVPRTPDDFLNSVDEMMDTGDITNQSTLPSQQNRFPDYLEAIPGTNVDL  
GTLEGDGMNIEGEEELMPSLQEQALSSDILNDMESVLAATKLDKESFLTWL PMRLRKLKLPDSFFKPP

rs:XP\_010377345 [XP\_010377345] PREDICTED: transcriptional coactivator  
YAP1 isoform X7 [Rhinopithecus roxellana].>rs:XP\_025212445 [XP\_025212445]  
transcriptional coactivator YAP1 isoform X7 [Theropithecus gelada].  
85..99

MDPGQQPPPPQAPQGGQPPAQQPPQGGQPSGPGQPAPAATQAAPQAPPAGHQIVHVRGDSETDLEALF  
NAVMPKKTANVPQTVPMRLRKLKLPDSFFKPPPEPKSHSRQASTDAGTAGALTPQHVRHSSPASLQLGAVSPGTLTP  
TGVVSGPAATPTAQHLRQSSFEIPDDVPLPAGWEMAKTSSGQRYFLNHIDQTTTWQDPRKAMLSQMNVTAPTSPP  
VQQNMMNSASGPLPDGWEQAMTQDGEIYYINHKNKTTSWLDPRLDPRFGKAMNQRIQSAPVKQPPPLAPQSPQG  
GVMGGNSNSNQQQQMRLQQLQMEKERLRLKQOELLRQELALRSQLPTLEQDGGTQNPVSSPGMSQELRTMTTNS  
SDPFLNSGTYHSRDESTDSGLSMSSYSVPRTPDDFLNSVDEMMDTGDITNQSTLPSQQNRFPDYLEAIPGTNVDL  
GTLEGDGMNIEGEEELMPSLQEQALSSDILNDMESVLAATKLDKESFLTWL PMRLRKLKLPDSFFKPP

rs:XP\_010377346 [XP\_010377346] PREDICTED: transcriptional coactivator  
YAP1 isoform X8 [Rhinopithecus roxellana].>rs:XP\_025212446 [XP\_025212446]  
transcriptional coactivator YAP1 isoform X8 [Theropithecus gelada].  
85..99

MDPGQQPPPPQAPQGGQPPAQQPPQGGQPSGPGQPAPAATQAAPQAPPAGHQIVHVRGDSETDLEALF  
NAVMPKKTANVPQTVPMRLRKLKLPDSFFKPPPEPKSHSRQASTDAGTAGALTPQHVRHSSPASLQLGAVSPGTLTP  
TGVVSGPAATPTAQHLRQSSFEIPDDVPLPAGWEMAKTSSGQRYFLNHIDQTTTWQDPRKAMLSQMNVTAPTSPP  
VQQNMMNSASGPLPDGWEQAMTQDGEIYYINHKNKTTSWLDPRLDPRFAMNQRIQSAPVKQPPPLAPQSPQGGV  
MGGNSNSNQQQQMRLQQLQMEKERLRLKQOELLRQELALRSQLPTLEQDGGTQNPVSSPGMSQELRTMTTNS  
SDPFLNSGTYHSRDESTDSGLSMSSYSVPRTPDDFLNSVDEMMDTGDITNQSTLPSQQNRFPDYLEAIPGTNVDL  
GTLEGDGMNIEGEEELMPSLQEQALSSDILNDMESVLAATKLDKESFLTWL PMRLRKLKLPDSFFKPP

rs:XP\_010377347 [XP\_010377347] PREDICTED: transcriptional coactivator  
YAP1 isoform X9 [Rhinopithecus roxellana].>rs:XP\_025212447 [XP\_025212447]

transcriptional coactivator YAP1 isoform X9 [Theropithecus gelada].>tr:A0A2K6PTL3\_RHIRO [A0A2K6PTL3] SubName: Full=Yes associated protein 1 {ECO:0000313|Ensembl:ENSRROP00000019866}; 85..99

MDPGQQPPPPQAPQGGQPPAQQPPQGGQPSGPGQPAPAATQAAPQAPPAGHQIVHVRGDSETDLEALF  
NAVMPKNTANVPQTVPMRLRKLKLPDSFFKPPPEPKSHSRQASTDAGTAGALTPQHVRHSSPASLQLGAVSPGTLTP  
TGVVSGPAATPTAQHLRQSSFEIPDDVPLPAGWEMAKTSSGQRYFLNHIDQTTTWQDPRKAMLSQMNVTAPTSPP  
VQQNMMNSASAMNQRISQSAPVKQPPPLAPQSPQGGVMGGSNSNQQQMRLQQLQMEKERLRLKQQELLRQVRPQ  
AMRNINPSTANSPKCQELALRSQLEPTLEQDGGTQNPVSSPGMSQELRTMTTNSSDPFLNSGTYHSRDESTDSGLS  
MSSYSVPRTPDFFLNSVDEMMDTGDITINQSTLPSQQNRFPDYLEAIPGTNVDLGTLEGDGMNIEGEEELMPSLQEQAL  
SSDILNDMESVLAATKLDKESFLTWL PMRLRKLKLPDSFFKPP

rs:XP\_010377349 [XP\_010377349] PREDICTED: transcriptional coactivator YAP1 isoform X10 [Rhinopithecus roxellana].>rs:XP\_025212448 [XP\_025212448] transcriptional coactivator YAP1 isoform X10 [Theropithecus gelada].

85..99

MDPGQQPPPPQAPQGGQPPAQQPPQGGQPSGPGQPAPAATQAAPQAPPAGHQIVHVRGDSETDLEALF  
NAVMPKNTANVPQTVPMRLRKLKLPDSFFKPPPEPKSHSRQASTDAGTAGALTPQHVRHSSPASLQLGAVSPGTLTP  
TGVVSGPAATPTAQHLRQSSFEIPDDVPLPAGWEMAKTSSGQRYFLNHIDQTTTWQDPRKAMLSQMNVTAPTSPP  
VQQNMMNSASAMNQRISQSAPVKQPPPLAPQSPQGGVMGGSNSNQQQMRLQQLQMEKERLRLKQQELLRQAMRN  
INPSTANSPKCQELALRSQLEPTLEQDGGTQNPVSSPGMSQELRTMTTNSSDPFLNSGTYHSRDESTDSGLSMSSY  
SVPRTPDFFLNSVDEMMDTGDITINQSTLPSQQNRFPDYLEAIPGTNVDLGTLEGDGMNIEGEEELMPSLQEQALSSDI  
LNDMESVLAATKLDKESFLTWL PMRLRKLKLPDSFFKPP

rs:XP\_010377350 [XP\_010377350] PREDICTED: transcriptional coactivator YAP1 isoform X11 [Rhinopithecus roxellana].>rs:XP\_025212449 [XP\_025212449] transcriptional coactivator YAP1 isoform X11 [Theropithecus gelada].

85..99

MDPGQQPPPPQAPQGGQPPAQQPPQGGQPSGPGQPAPAATQAAPQAPPAGHQIVHVRGDSETDLEALF  
NAVMPKNTANVPQTVPMRLRKLKLPDSFFKPPPEPKSHSRQASTDAGTAGALTPQHVRHSSPASLQLGAVSPGTLTP  
TGVVSGPAATPTAQHLRQSSFEIPDDVPLPAGWEMAKTSSGQRYFLNHIDQTTTWQDPRKAMLSQMNVTAPTSPP  
VQQNMMNSASAMNQRISQSAPVKQPPPLAPQSPQGGVMGGSNSNQQQMRLQQLQMEKERLRLKQQELLRQVRPQ  
ELALRSQLEPTLEQDGGTQNPVSSPGMSQELRTMTTNSSDPFLNSGTYHSRDESTDSGLSMSSYSVPRTPDFFLNS  
VDEMMDTGDITINQSTLPSQQNRFPDYLEAIPGTNVDLGTLEGDGMNIEGEEELMPSLQEQALSSDILNDMESVLAATK  
LDKESFLTWL PMRLRKLKLPDSFFKPP

rs:XP\_010377351 [XP\_010377351] PREDICTED: transcriptional coactivator YAP1 isoform X12 [Rhinopithecus roxellana].>rs:XP\_025212450 [XP\_025212450] transcriptional coactivator YAP1 isoform X12 [Theropithecus gelada].

85..99

MDPGQQPPPPQAPQGGQPPAQQPPQGGQPSGPGQPAPAATQAAPQAPPAGHQIVHVRGDSETDLEALF  
NAVMPKNTANVPQTVPMRLRKLKLPDSFFKPPPEPKSHSRQASTDAGTAGALTPQHVRHSSPASLQLGAVSPGTLTP  
TGVVSGPAATPTAQHLRQSSFEIPDDVPLPAGWEMAKTSSGQRYFLNHIDQTTTWQDPRKAMLSQMNVTAPTSPP  
VQQNMMNSASAMNQRISQSAPVKQPPPLAPQSPQGGVMGGSNSNQQQMRLQQLQMEKERLRLKQQELLRQELAL  
RSQLEPTLEQDGGTQNPVSSPGMSQELRTMTTNSSDPFLNSGTYHSRDESTDSGLSMSSYSVPRTPDFFLNSVDEM  
DTGDITINQSTLPSQQNRFPDYLEAIPGTNVDLGTLEGDGMNIEGEEELMPSLQEQALSSDILNDMESVLAATKLDKE  
SFLTWL PMRLRKLKLPDSFFKPP

rs:XP\_010332927 [XP\_010332927] PREDICTED: transcriptional coactivator YAP1 [Saimiri boliviensis boliviensis].>rs:XP\_021527402 [XP\_021527402] transcriptional coactivator YAP1 isoform X9 [Aotus nancymae]. 13..27

MNPKTANVPQTVPMRLRKLKLPDSFFKPPPEPKSHSRQASTDAGTAGALTPQHVRHSSPASLQLGAVSPGT  
LTPTGVVSGPAATPTAQHLRQSSFEIPDDVPLPAGWEMAKTSSGQRYFLNHIDQTTTWQDPRKAMLSQMNVTAPTS  
SPPVQQNMMNSASGPLPDGWEQAMTQDGEIYYINHKNKTTSWLDPRLDPRFGKAMNQRISQSAPVKQPPPLAPQS  
PQGGVMGGSNSNQQQMRLQQLQMEKERLRLKQQELLRQVRPQAMRNINPSTANSPKCQELALRSQLEPTLEQDGG  
TQNPVSSPGMSQELRTMTTNSSDPFLNSGTYHSRDESTDSGLSMSSYSVPRTPDFFLNSVDEMMDTGDITINQSTLP  
SQQRFPDYLEAIPGTNVDLGTLEGDGMNIEGEEELMPSLQEQALSSDILNDMESVLAATKLDKESFLTWL  
PMRLRKLKLPDSFFKPP

rs:XP\_010348846 [XP\_010348846] PREDICTED: protein **FAM181A** isoform X1 [Saimiri boliviensis boliviensis].>tr:A0A2K6SBJ9\_SAIBB [A0A2K6SBJ9] SubName: Full=Family with sequence similarity 181 member A {ECO:0000313|Ensembl:ENSSBOP00000004749}; 225..239

MLCIWRGAPDWPEGPPSSGELSSIQPTQGLHNCFQPDGARPVAVPGVPVGLQRGTCRVTLVGRPRPAPLVS SVSFLGAASHQQSPSSWKALCGGPLVMASDSVVKMLLNLFVNLAASSDIKAALDKSAPCRRSVDHRKYLQKQLKRF SQKYSRLPRGLPGRAAEPYLKRGPEDRPGRLLLDLGPESPPGGGGGCKEKVLRNPCREECLAKEQLPQGQHPEAA QAGQVPMRKRQLPASFWEEP RPTHSHYHVGLGGLGPREGPPYEGKKNCKGLEPLGPETASVPMSPSALAEKESLK MPGVSLVGRVNAWSCCPFYHGQPIYPGGLGALPQSPVPSLGLWRKSPAFFPGELAYLCKDADGLGQKVC RPMVLK PIPTKPAVPPPVFNVFGYL PMRKRQLPASFWEEP

rs:XP\_003939877 [XP\_003939877] PREDICTED: protein **FAM181A** isoform X2 [Saimiri boliviensis boliviensis]. 129..143

MASDSVVKMLLNLFVNLAASSDIKAALDKSAPCRRSVDHRKYLQKQLKRF SQKYSRLPRGLPGRAAEPYLKR GPEDRPGRLLLDLGPESPPGGGGGCKEKVLRNPCREECLAKEQLPQGQHPEAAQAGQVPMRKRQLPASFWEEP RPTHSHYHVGLGGLGPREGPPYEGKKNCKGLEPLGPETASVPMSPSALAEKESLKMPGVSLVGRVNAWSCCPFYHG QPIYPGGLGALPQSPVPSLGLWRKSPAFFPGELAYLCKDADGLGQKVC RPMVLKPIPTKPAVPPPVFNVFGYL PMRKRQLPASFWEEP

rs:XP\_010834522 [XP\_010834522] PREDICTED: protein **FAM181A** [Bison bison bison]. 130..144

MASDSVVKMLLNLFVNLAASSDIKAALDKSAPCRRSVDHRKYLQKQLKRF SQKYSRLPRGLPGRAE PHLK RGPEDRPGRLPLESGHGSSPGGGGGCKEKALGNLDREESLSKEQTLHGPDPGAARPGQVPMRKRQLPASFWEEP RPTHSHYHVGLGGLGPREGPPYEGKKNCKGLEPLGPETAPVPTS PRAPAEKEPLKMPGVSLVGRVSAWSCCPFYHG QPVYPSPPGALPQSPMPSLGLWRKSAASPGELAHFCKDAEGPGQKVYRPVVLKPIPTKPAVPPPIFNVFGYL PMRKRQLPASFWEEP

rs:XP\_010967024 [XP\_010967024] PREDICTED: protein **FAM181A** [Camelus bactrianus].>rs:XP\_006184238 [XP\_006184238] PREDICTED: protein **FAM181A** [Camelus ferus].>tr:S9X237\_CAMFR [S9X237] SubName: Full=Uncharacterized protein {ECO:0000313|EMBL:EPY81629.1}; 129..143

MASDSVVKMLLNLFVNLAASSDIKAALDKSAPCRRSVDHRKYLQKQLKRF SQKYSRLPRGLPSRGAEPHLK RVPEDRPGRLPRDSGHNSSPSGGGGYKEKALGNPYREECLPKEQTLQGQDPEAARPGQVPMRKRQLPASFWEEP RPTHSHYPMGLEGLGPREGLPYEGKKNCKGLEPLGPETAPLPTKEPLKMPGVSLVGRVNAWSCCPFYHGQPIYP GPPGALPQSPVPGGLWRKSSISPVELVHFCKDVEGPGQKVYRPVVLKPIPTKPAVPPPIFNVFGYL PMRKRQLPASFWEEP

rs:XP\_010971617 [XP\_010971617] PREDICTED: transcriptional coactivator YAP1 [Camelus bactrianus]. 13..27

MNPKTANVPQTVPMRLRKL PDSFFKPPPEPKSHSRQASTDAGTAGALTPQH VRAHSSPASLQLGAVSPGT LTPTGVVSGPAAAPAAQHLRQSSFEIPDDVPLPAGWEMAKTSSGQRYFLNHIDQTTTWQDPRKAMLSQMNVTAPT SPPVQONMMNSASGPLPDGWEQAMTQDGEIYYINHKNKTTSWLDPRLDPRFAMNQRIQSAPVKQPPPLAPQSPQ GGVMGGSSNQQQMRLQQLQMEKERLRLKQOELLRQAMRNINPSTANSPKCQELALRSQLPTLEQDGGTQNPVS SPGMSQELRTMTTNSSDPFLNSGTYHSRDESTDSGLSMSSYSVPRTPD DFLNSVDEMDTGDTINQSTLPSQQNRF PDYLEAIPGTNVDLGTLEGDGMNIEGELMPSLQEQALSSDILNDMESVLAATKLDKESFLTWL PMRLRKL PDSFFKPP

rs:XP\_010971746 [XP\_010971746] PREDICTED: protein **FAM181B**, partial [Camelus bactrianus]. 66..80

GPRSLQSRSLAALFDSL RHVPGGAESAGATVAAPAAGLGRAGAGGAGGDAAGPAGGPLVPGARKVPLRA RNLPPSFFTEPSRAGGGVCGPSGPGVSLGDLEKGAEEVEFFELLGPDYAGTETGVLLAAESLDVFP TGAALRG PPELEPGLFEP PAMVGSLLYEPW SAPGCPPTKKPPLAAPRGGLTLNEPLRPLYPAAADSPGGEDGPGLLATLA PFFSDCALPPPPLPQQVSYDYSAGYSRTAYSSSLWRADGVWEGASGEEGAHRD PLRARNLPPSFFTEP

rs:XP\_004342951 [XP\_004342951] hypothetical protein CAOG\_07866 [Capsaspora owczarzaki ATCC 30864]. 3..17

MPPLRDRNL PASFFRSPSSAAADRIDSSAMSEAGASHSRDSSLD SGISFVPHQPQLIMNGSTFFPVAFH SRQSSAGSSEPT SQSHNLQQQQLLLLQQQQQQQQQLLYQQQQQQLSLPQQSGQMPGQSPG LLVPMYNQLQHSYQT SQSSPFP PATSSAHSSTFFSREPSISSFLEMSLHFEQQQQQPQQHSRPLSHSN SGNVLSAQANNPGLPASGNSS

NSLQRLSASSLDESPLPPGWKGIKDGLPFFIDHNNKTTTWVDPRTDRATPGTQGLSERKRVDPVLSDDLNP  
NPLPAGWEMAMHSDGIPYFINHRKRTTTWIDPRTDVDMQEISPRNTPFSSFDALPDPGYDQMTGNSSPLAS  
TSPPPPVPSPGITGMSQSLAGLSQRELQARRMMLQKEQIRLQKQMLLQEELEIQRAQRNLAVLETTTRGGS  
AKLP  
PPQLTVSECLTTTTATATADVTSRRSDQPSTRPCSS            PLRDRNLPASFFRSP

rs:XP\_011305607 [XP\_011305607] PREDICTED: transcriptional coactivator  
YAP1 isoform X1 [Fopius arisanus].>tr:A0A0C9QIP1\_9HYME [A0A0C9QIP1]  
SubName: Full=Yap1\_0 protein {ECO:0000313|EMBL:JAG73151.1};            46..60  
MALNTDVDQLTKGNLVVRIDQNSESDLQALFDSVLKPDSCRPLQVPLMRNLPDSFFNPPSTGSKSPSI  
SHSRENSADSAFGTIIISNGPGSNSNGGNTNGNGNQTSVPAGLTVAHPRAHSSPASLQQTAAAAQATQHAPQPHAR  
HVHHQKQRSYDVISTVDDLGLPLPHGWQARTPEGQVYFLNHLTRTTTWEDPRKTAATAANVTITAAAENKSPAGA  
GANALGPLPDGWQARTPEGEIYFINHQTRTTSWFDPRIPTHLQRAPTSGAMLPTNWIQPPGATGLQSNQTIQVC  
QQKLRLQSLQMERERLQKQRAEIMRQQLMLRQSNQTDASMDPFLSGMSEQHARQESADSGLGLGSAYS  
SLPHTPED  
FLSNIDDNMDATSDGGAPMETPDI STLSDNIDSTDDLVPVSLQLGEEFTSDILDDVQSLINPSSTK  
PENVLTWL  
PLMRNLPDSFFNPP

rs:XP\_011305608 [XP\_011305608] PREDICTED: transcriptional coactivator  
YAP1 isoform X2 [Fopius arisanus].>tr:A0A0C9RQQ6\_9HYME [A0A0C9RQQ6]  
SubName: Full=Yap1\_1 protein {ECO:0000313|EMBL:JAG80602.1};            46..60  
MALNTDVDQLTKGNLVVRIDQNSESDLQALFDSVLKPDSCRPLQVPLMRNLPDSFFNPPSTGSKSPSI  
SHSRENSADSAFGTIIISNGPGSNSNGGNTNGNGNQTSVPAGLTVAHPRAHSSPASLQQTAAAAQATQHAPQPHAR  
HVHHQKQRSYDVISTVDDLGLPLPHGWQARTPEGQVYFLNHLTRTTTWEDPRKTAATAANVTITAAAENKSPAGA  
GANALGPLPDGWQARTPEGEIYFINHQTRTTSWFDPRIPTHLQRAPTSGAMLPTNWIQPPGATGLQSNQTIQVC  
QQKLRLQSLQMERERLQKQRAEIMRQQLMLRQSNQTDASMDPFLSGMSEQHARQESADSGLGLGSAYS  
SLPHTPED  
FLSNIDDNMDATSDGGAPMETPDI STLSDNIDSTDDLVPVSLQ            PLMRNLPDSFFNPP

rs:XP\_011501142 [XP\_011501142] PREDICTED: transcriptional coactivator  
yorkie isoform X1 [Ceratosolen solmsi marchali].            51..65  
MALNQDVADVAGTGGAKSNLVVRIDQNSESDLQALFDTVLKPDSCRPLQVPLMRNLPDSFFNPPSTGS  
KSPSISHSRENSADSAFGAGVAVANGSGVGGATSPGAAAAAAAAAAAAAAAAAAPSAAAPAGAAQVPQGLTVAHPR  
AHSSPASLQQTAYASAQQNQHAPQPHSARHHHHQKQRSYDVISTVDDLGLPLPHGWQARTPEGQIYFLNHLTRTT  
TWEDPRKTAATAASVAAVAAAVESGKTSTAAAGSNALGPLPDGWQARTPEGEIYFINHQARTTSWFDPRIPTHLQ  
RAPTSGAMLQNWQIQQQAGGGLQSSQTLQACQKLRQLQSLQMERERLQKQRAEIMRQVSSQELMLRQSTTDAAM  
DPFLSGINEQHARQESADSGLGLGSAYS  
SLPHTPEDFLANIDDNMDGTSEGAPMETPDLSTLSDNIDSTDDLVPVSLQLGEDFSSDILEDVQSLINPVGNTTKPENILT  
WL            PLMRNLPDSFFNPP

rs:XP\_011501143 [XP\_011501143] PREDICTED: transcriptional coactivator  
yorkie isoform X2 [Ceratosolen solmsi marchali].            51..65  
MALNQDVADVAGTGGAKSNLVVRIDQNSESDLQALFDTVLKPDSCRPLQVPLMRNLPDSFFNPPSTGS  
KSPSISHSRENSADSAFGAGVAVANGSGVGGATSPGAAAAAAAAAAAAAAAAAAPSAAAPAGAAQVPQGLTVAHPR  
AHSSPASLQQTAYASAQQNQHAPQPHSARHHHHQKQRSYDVISTVDDLGLPLPHGWQARTPEGQIYFLNHLTRTT  
TWEDPRKTAATAASVAAVAAAVESGKTSTAAAGSNALGPLPDGWQARTPEGEIYFINHQARTTSWFDPRIPTHLQ  
RAPTSGAMLQNWQIQQQAGGGLQSSQTLQACQKLRQLQSLQMERERLQKQRAEIMRQQLMLRQSTTDAAMD  
PFLSGINEQHARQESADSGLGLGSAYS  
SLPHTPEDFLANIDDNMDGTSEGAPMETPDLSTLSDNIDSTDDLVPVSLQLGEDFSSDILEDVQSLINPVGNTTKPENILT  
WL            PLMRNLPDSFFNPP

rs:XP\_011571321 [XP\_011571321] PREDICTED: protein **FAM181A** [Aquila  
chrysaetos canadensis]. 127..141  
MASDSEVKTLNLFVNLAASSDIKAALDKSAPCRRSVDHRKYLQKQLKRFSQKYSRIPRCHPSKPPECSWR  
RGAEERGRGPQAEAPDPSPHGGAAAEKVLQAAEAEDSLTGERVLQEQNPEATRPDQVPMRKRQLPASFWEEP  
RPA  
QSLPARAFAAGPEGLPAPRDPPIYEGKKSRRSPDAAGPESPEPALHAGEKDPAGVLSGRVGAWTCCFP  
PCPGP  
VYQPPGTLPPSPFPLGLWRKSAAALPAEVPHFCKEADGTGQKLYRPVVLKPIPTKPAVPPPIFNVFGYL  
PMRKRQLPASFWEEP

rs:XP\_011585004 [XP\_011585004] PREDICTED: sentrin-specific protease 3-  
like [Aquila chrysaetos canadensis].            188..202  
MHGRAAAPRVSPGPGVPLHADMAAGVIQPLAELRLPSPFPHGLLLPTRPEPDFDLSEEEEEEEEEEEEE  
EEEEAEESMRPELAIPSAEATLRLLLKFSSELISCDIQRYFGRRGREEAAGSRAPEDCGSPRHAEAQ  
PETAAPQG

GPGAVHRLGPLAELFEYGVHRCLPPRAAGSKTQRLERKYGHITPMHRRKLPSPFWREPSPASLLHAGTPDFSD  
LLANWTAEPGPELPGAGRELPEPGRPELEAEFFVGL PMHRRKLPSPFWREP

rs:XP\_011686481 [XP\_011686481] PREDICTED: transcriptional coactivator  
yorkie [Wasmannia auropunctata]. 46..60

MALNQDVDQLSKSNPVVRVDQNSESDLQALFDTVLPKPSKRPLQVPLMRNLPDSFFNPPSTGSKSPSI  
SHSRENSADSAFGAAVTATPNNGGGGVPPNGGTSSGGGGGGGSAGNAAGAAGAGGGSGGAGGGANGTVSAIAAAAV  
AAGLTVSHPRAHSSPASLQQTYASAQQAPQHAPQPHARHHHHQKQRSYDVIISTVDDLGPLPHGWEQARTPEGQIY  
FLNHLTRTTTTWEDPRKTAASVAAVAAVESNKSNSLGLPLDGWEQARTAEGETYFINHQTRTTSWFDPRIPSH  
LQRTPASGAMLPQNWQLQOPTGIQSNQSLQACQKQKIRLQSLQMERERLQQRQOEIMRQQEMMLRQSNTDAVMDP  
FLSGINEQHARQESADSGGLGSAAYPLPQAGTEDFLNIDENMDGTSDDGAPMDTPDISTLSDNIDTDDLLPSLH  
LNEDFTTDILDVQSLINPNPTKENVLTLW PLMRNLPDSFFNPP

rs:XP\_017345841 [XP\_017345841] PREDICTED: protein **FAM181B** [Ictalurus  
punctatus].>tr:A0A2D0STK5 ICTPU [A0A2D0STK5] SubName: Full=protein **FAM181B**  
{ECO:0000313|RefSeq:XP\_017345841.1}; 155..169

MAVQAATMNSQFLNFCFPGSVMEYEVEKGLDGAFLGEVDCEGDFREATSDLLSFIDSASSNIKLALDKP  
VKSKRKNVHRKYLQKQIKRCTGIMGLGNGTPOEAYKSHDSTSTPTSIIQNKTPKRQGAQANLQSKSLAALFNHAK  
DLRGEKTKKPLRHRNLPSSFFTEPANARVTSTSGMSLKDLERGNPDATEFFELLGPDYSNMVSEQELFHTMPN  
RVQQQGTVGLEPISFDSHNFVTGGFLYTEPWATSSGVSKKTDIKTVPGQSSLYGNTDSSCPVPIEQNSTCSLTF  
PNLFTDCSVSQVPYDLASGYSRGSFPPL PLRHRNLPSSFFTEP

rs:XP\_011794294 [XP\_011794294] PREDICTED: protein **FAM181B** [Colobus  
angolensis palliatus]. 221..235

MAVQAALLSTHPFVFPFGGGSPDGLGGAFGALDKGCCFEDDETGAPAGALLSGAEGGDVREATRDLLSF  
IDSASSNIKLALDKPGKSKRKNVHRKYLQKQIKRCSGLMGAVPPGPPSPSAADTPAKRPLAAPSAPTVAVPAHGK  
AVPRREASQAAAASSLQSRSLAALFDSLHRVPGAEPAGGAVVAVVAGLGGSATGGAGGDAAGPAGATAVTGARK  
VPLRARNLPSSFFTEPSRAGGSGCGSPGPDVSLGDLEKGAEEFFELLGPDYGAGTEAAVLLAAEPLDVFPAGA  
SVLRGPELESGLFDPAPAVVGNLLYPEPWSVPGCPPTKKPPLTAPRGGLTLNEPLRPLYPAAADSPPGGEDGPGH  
LASFSPPFPDCALPPPPPPHQVSYDYSAGYSRNAYSSLWRPDGVWEGAPGEEGAHRD PLRARNLPSSFFTEP

rs:XP\_011847115 [XP\_011847115] PREDICTED: protein **FAM181A** isoform X1  
[Mandrillus leucophaeus]. 179..193

MMQPTESTEGPGRKRQGTAKQVSLVPFLGAAGHQOSPSSWKASCSPGLVMASDSDVKMLLNFNVLASS  
DIKAALDKSAPCRRSVDHRKYLQKQLKRFSQKYSRLPRGLPGRAAEPYLKRGSEDRPGRLLLLDLGPDSSPGGGG  
CKEKALRNYPYREECLAKEQLLQGHPEAAQPGQVPMRKRQLPASFWEEPRTSHSYHVGLEGGLPREGPPYEGKK  
NCKGLEPLGPEIVPVPMSPRALAEKEPLKMPGVSLVGRVNAWCCPFQYHGQPIYPGPLGALPQSPVPSLGLWKK  
SPAFPGELAHLCCKDVGDLGQKVCPRVVLKPIPTKPAVPPPIFNVFGYL PMRKRQLPASFWEEP

rs:XP\_011847116 [XP\_011847116] PREDICTED: protein **FAM181A** isoform X2  
[Mandrillus leucophaeus].>rs:XP\_011847117 [XP\_011847117] PREDICTED: protein  
**FAM181A** isoform X2 [Mandrillus leucophaeus].>rs:XP\_011847119 [XP\_011847119]  
PREDICTED: protein **FAM181A** isoform X2 [Mandrillus leucophaeus]. 129..143

MASDSDVKMLLNFNVLASSDIKAALDKSAPCRRSVDHRKYLQKQLKRFSQKYSRLPRGLPGRAAEPYLK  
RGSEDRPGRLLLLDLGPDSSPGGGGGCKEKALRNYPYREECLAKEQLLQGHPEAAQPGQVPMRKRQLPASFWEEP  
PRTSHSYHVGLEGGLPREGPPYEGKKNCKGLEPLGPEIVPVPMSPRALAEKEPLKMPGVSLVGRVNAWCCPFQY  
HGQPIYPGPLGALPQSPVPSLGLWKKSPAFPGELAHLCCKDVGDLGQKVCPRVVLKPIPTKPAVPPPIFNVFGYL  
PMRKRQLPASFWEEP

rs:XP\_011847122 [XP\_011847122] PREDICTED: protein **FAM181A** isoform X3  
[Mandrillus leucophaeus]. 165..179

MACFVQVSLVPFLGAAGHQOSPSSWKASCSPGLVMASDSDVKMLLNFNVLASSDIKAALDKSAPCRR  
SVDHRKYLQKQLKRFSQKYSRLPRGLPGRAAEPYLKRGSEDRPGRLLLLDLGPDSSPGGGGGCKEKALRNYPYREE  
LAKEQLLQGHPEAAQPGQVPMRKRQLPASFWEEPRTSHSYHVGLEGGLPREGPPYEGKKNCKGLEPLGPEIVP  
VPMSPRALAEKEPLKMPGVSLVGRVNAWCCPFQYHGQPIYPGPLGALPQSPVPSLGLWKKSPAFPGELAHLCCK  
VDGLGQKVCPRVVLKPIPTKPAVPPPIFNVFGYL PMRKRQLPASFWEEP

rs:XP\_011806945 [XP\_011806945] PREDICTED: protein **FAM181A** isoform X1  
[Colobus angolensis palliatus]. 177..191

MQPTESTEGPGRKRQGTAKQVSLPFLGAAGHQOSPSSWKASCSGPLVMASDSVDMKLLNFVNLIASSDI  
KAALDKSAPCRRSVDHRKYLQKQLKRFSQKYSRLPRGLPGRATEPYLKRGESEDRPGRLLLLDLGPDSSPGGGGGCK  
EKALRNPYREECLAKEQLPQGQHPEAAQPGQVPMRKRQLPASFWEEP RPTHSHYHVGLEGGGLGPREGPPYEGKKNK  
KGLEPLGPEIVPVPMSPRALAEKEPLKMPGVSLVGRVNAWSCCPFQYHGQPIYPGPLGALPQSPVPSLGLWKKSP  
AFPGEVLVHLCKDADGLGQKVCPRPVVLKPIPTKPAVPPPIFNVFGYL PMRKRQLPASFWEEP

rs:XP\_011806946 [XP\_011806946] PREDICTED: protein **FAM181A** isoform X2  
[Colobus angolensis palliatus].>rs:XP\_011806947 [XP\_011806947] PREDICTED:  
protein **FAM181A** isoform X2 [Colobus angolensis palliatus].>rs:XP\_011806949  
[XP\_011806949] PREDICTED: protein **FAM181A** isoform X2 [Colobus angolensis  
palliatus]. 129..143

MASDSVDMKLLNFVNLIASSDIKAALDKSAPCRRSVDHRKYLQKQLKRFSQKYSRLPRGLPGRATEPYLK  
RGESEDRPGRLLLLDLGPDSSPGGGGGCKEKALRNPYREECLAKEQLPQGQHPEAAQPGQVPMRKRQLPASFWEEP R  
PTHSHYHVGLEGGGLGPREGPPYEGKKNCKGLEPLGPEIVPVPMSPRALAEKEPLKMPGVSLVGRVNAWSCCPFQYH  
GQPIYPGPLGALPQSPVPSLGLWKKSPAFPGEVLVHLCKDADGLGQKVCPRPVVLKPIPTKPAVPPPIFNVFGYL  
PMRKRQLPASFWEEP

rs:XP\_011782007 [XP\_011782007] PREDICTED: transcriptional coactivator  
YAP1, partial [Colobus angolensis palliatus]. 48..62

PAATQAAPQAPPAGHQIVHVRGDSETDLEALFNAVMPKNTANVPQTVPMRLRKLKLPDSFFKPPPEPKSHSR  
QASTDAGTAGAVTPQHVGVSHPASLQGLAVSPGTLTPTGVVSGPAATPTAQSLQSSFEIPDDVPLPADWEMAK  
TSSGQRYFLNHIDQTTTWQDPRKAMLSQMNVTAPTSPVQONMMNSASGPLPDGWEQAMTQDGEIYYINHKNKTT  
SWLDPRLDPRFAMNQRISQSDPVKQPPPLAPQSPQGGVMGGSNSNQOQMRLOQLQMEKERLRLKQOELLRQAMR  
NINPSTANSPKCQELALRSQLPTLEQDAGTPNPVSSPGMSQELRTMTTNSSDPFLNSGTYHSRDESTDSGLSMSS  
YSVPRTDDFLNSVDEMDTGDITINQSTLPSQONRFPDYLEAIPGTNVDLGTLEGDGMNIEGEEMLPSLQEAALSSD  
ILNDMESVLAATKLDKESFLTWL PMRLRKLKLPDSFFKPP

rs:XP\_017546373 [XP\_017546373] PREDICTED: protein **FAM181A** [Pygocentrus  
nattereri]. 117..131

MASDSEVKTLNLFVNLIASSDIKAALDKSAPCRRSVDHRKYLQKQLKRFSQKCSRMPRCHTHRVTDSAP  
KVTEDKPATLTQESAASLSHANGKREPRTERLDLDPDPEDPQQTGQVPMRKRQLPASFWEEP RSRGGERPCFHHA  
WKRNSHVGSHAYESDGEKSARIYDERKANLLPSARRCSPDLEPLRVALTCGCTPFQYRGSQALHHAHHLPLPQ  
VPLTHVGLRAKVNGTDLDMQKMPDGLKNNTAHVVVKPIPTKPVASIFSVFGFI PMRKRQLPASFWEEP

rs:XP\_017552201 [XP\_017552201] PREDICTED: protein **FAM181B** [Pygocentrus  
nattereri]. 156..170

MAVQAAIMNSQFLNFCFPGSVMEYEVEKGLDGSLLGEADCEDDFRETTRDLSFIDSASSNIKLALDKP  
VKSkrkVnhrkylqkqikrctgiiASGNAATQEPCKGDSPQAPTSTLQSKTPTKRDSQANLQSKSLAALFNPA  
KDLRGERAKKPLRHRNLPPSFFTEPANSSRVSTSGMSLKDLEGRNPDAAEFFELLGPDYSNMVSEQELFQSTP  
IRVQQEGTGGPEPGSFDShpvtGGFLYAEPWDTSSNVAKKTGDMRTVPGQPHLYGNTDSSGPVQVEQSSPCALT  
FPNFFTDCSVSQVSYDLASGYSRGSFPTL PLRHRNLPPSFFTEP

rs:XP\_012228600 [XP\_012228600] PREDICTED: transcriptional coactivator  
YAP1 isoform X1 [Linepithema humile]. 46..60

MALNQDQDQLSKSNLVVRIDQNSESDLQALFDTVLKPDskRPLQVPLRMRNLKLPDSFFNPPSTGSKSPSI  
SHSRENSADSAFGTAVTATPSNGGGSGAPNAGTNGAGGGGGGGGGGGGGGNAAGAAGTGGGAGAGSGTNSAAGA  
VAAAAAAAAAAAAAVAGLTVAHPRAHSSPASLQQTYSASAQQAPQHAPQPHARHHHHQKQRSYDVISTVDDLGLPLH  
GWEQARTPEGQIYFLNHLTRTTTWEDPRKTAASVAASVAASVAASVSSKSTGNSLGPLPDGWEQARTAEGEIYFINH  
QTRTTSWFDPRIPTHLQRTPASGAMLPSWLQOSTGGGIQSNQSLQACQKLRQLSLQLERERLKRQOQEIIMRQQ  
EMMMRQTTDAAMDPLSGINEQHARQESADSLGLSSAYSPLHTPEDFLANMDDNMDGTNDRHCVLNDLTKRLYR  
SHKYINGSAPMETPDLSTLSDNIDSTDDLLPSLQLSSEDFSSDILDDVQSLINPNTTKPENVLTLW  
PLRMRNLKLPDSFFNPP

rs:XP\_012228601 [XP\_012228601] PREDICTED: transcriptional coactivator  
YAP1 isoform X2 [Linepithema humile]. 46..60

MALNQDQDQLSKSNLVVRIDQNSESDLQALFDTVLKPDskRPLQVPLRMRNLKLPDSFFNPPSTGSKSPSI  
SHSRENSADSAFGTAVTATPSNGGGSGAPNAGTNGAGGGGGGGGGGGGGGNAAGAAGTGGGAGAGSGTNSAAGA  
VAAAAAAAAAAAAAVAGLTVAHPRAHSSPASLQQTYSASAQQAPQHAPQPHARHHHHQKQRSYDVISTVDDLGLPLH  
GWEQARTPEGQIYFLNHLTRTTTWEDPRKTAASVAASVAASVAASVSSKSTGNSLGPLPDGWEQARTAEGEIYFINH



QTRTTSWFDPRIPTHQLQRTPASGAML PQSWLQQSTGGGIQSNQSLQACQQKLRQLQSLQLERERLQKQRQQEIMRQQ  
EMMMRQTTDAAMDPFLSGINEQHARQESADSGGLSSAYSHPHTPEDFLANMDDNMDGTNDGSAPMETPDLSTLS  
DNIDSTDDLLPSLQLSSEDFSSDILDDVQSLINPNTTKPENVLTLW PLRMRNLPDSFFNPP

rs:XP\_009279071 [XP\_009279071] PREDICTED: protein **FAM181A** [Aptenodytes  
forsteri].>tr:A0A087R539\_APTFO [A0A087R539] SubName: Full=Protein **FAM181A**  
{ECO:0000313|EMBL:KFM08593.1}; 127..141

MASDSEVKTLNLFVNLASSDIKAALDKSAPCRRSVDHRKYLQKQLKRFSQKYSRIPRCHPSKPPECGWR  
RGTEDRGRGPQPEAPDPSPHSGAAAQKVLRTAEAEESLTGEWVLQEQNPEAVRPDQLPMRKRQLPASFWEEP  
QSLPARAFAPGPEGLPAPRDPPIYKGGKSKRSSDAAGPESPPEAPHTGEKDPAGVLSGRMGTWTCPPFP  
VYQPPGALPPSPFPGLGLWRKSAALPAEVPHFCKEADGTGQKLYRPVVLKPIPTKPAVPPPIFNVFGYL  
PMRKRQLPASFWEEP

rs:XP\_003254700 [XP\_003254700] PREDICTED: protein **FAM181B** [Nomascus  
leucogenys]. 221..235

MAVQAALLSTHPFVFPFGGGSPDGLGGAFGLDCKGCCFEDDETGAPAGALLSGVEGGDVREATRDLLSF  
IDSASSNIKALDKPGKSKRKNHRKYLQKQIKRCSGLMGAAPPSPSAADTPAKRPLAAPSAPTVAAPAHGK  
AAPRREASQAAAAFLXXXSLAALFDSLHHPGGAEPAGGAVAAPAAGLGGAGTGGAGGDAAGPAGATAIPGARK  
VPLRARNLPPSFFTEPSRAGGGGCGSPGPDVSLGDLEKGAEEVEFFELLGPDYAGTEAAVLLAAEPLDVFPAGA  
SVLRGPPPELEPGLFEPFPAVVGNNLYPEPWSVPGCPPTKKSPLTAPRGGLTLNEPLRPLYPAAADS  
LASFAPFFPDICALPPPPPHQVSYDYSAGYSRTAYSSLWRSQVWEGAPGEEGAHRD PLRARNLPPSFFTEP

rs:XP\_004093219 [XP\_004093219] PREDICTED: LOW QUALITY PROTEIN: protein  
**FAM181A** [Nomascus leucogenys]. 129..143

MASDSVDMKLLNLFVNLASSDIKAALDKSAPCRRSVDHRKYLQKQLKRFSQKYSRLRPLRGLPGRAAE  
RGSEDRPGRLLLDLGPDSSPGXGGGCKEKALRNPYREECLAKEQLPQGGHPEAAQPGQVPMRKRQLPAS  
PHTSYHVGLEGGLPREGPPYEGKKNCKGLEPLGPETTPVPMSPRVLVEKEPLKMPGVSLVGRVNAW  
GQPIYPGLGALPQSPVPSLGLWRKSPAFFGELAHLCCKDAGGLGQKVCRPVVLKPIPTKPAVPPPIFN  
PMRKRQLPASFWEEP

rs:XP\_012497244 [XP\_012497244] PREDICTED: protein **FAM181B** [Propithecus  
coquereli]. 221..235

MAVQAALLSTHPFVFSFGGGSPDGLGGAFGALDCKGCCFEDDETGAPAGALLSGAEGGDVREATRDLLSF  
IDSASSNIKALDKPGKSKRKNHRKYLQKQIKRCSGLMGAAPPSPSAADTPAKRPLVAPSAPAVAVPAPGK  
PAPRREASQAAAAASLQSRSLAALFDSLRLHPLGDAEPAGAAVAAPAAGLGGAGAGGAGGDGAGPSGGTAV  
VPLRARNLPPSFFTEPSRAGGGGCGSPGPGVSLGDLEKGAEEVEFFELLGPDYSAGTEAAVLLAAEPLDA  
AVLRAPPELEPSFFEPFPAVVGNNLYPEPWSVPGCPATKPKPLTAPRGGLTLNEPLRPLYPAAADS  
LASFAPFFPDICALPPPPPHQVSYDYSAGYSRTAYASLWRPDGVWEGPPGEEGAHRD PLRARNLPPSFFTEP

rs:XP\_012510651 [XP\_012510651] PREDICTED: protein **FAM181A** [Propithecus  
coquereli].>rs:XP\_012510652 [XP\_012510652] PREDICTED: protein **FAM181A**  
[Propithecus coquereli]. 129..143

MASDSVDMKLLNLFVNLASSDIKAALDKSAPCRRSVDHRKYLQKQLKRFSQKYSRLRPLRGLPGRAAE  
RGSEDRPGRLLLDLGPPESSPGGGGCKEKAPGSPYGEELCSKEQVLQGGQSPQVPMRKRQLPASFWEEP  
PHTSYPMGLEGGLPREGPPYEGKKNCKGLEPLGPEVALVPMSPRALAEKEPLEMPGVSLVGRGNAW  
GQPIYPGLGALPQSPVPSLGLWRKSPAFFGELAHLCCKDVGQVCRPVVLKPIPTKPAVPPPIFNVFGYL  
PMRKRQLPASFWEEP

rs:XP\_012514677 [XP\_012514677] PREDICTED: transcriptional coactivator  
YAP1 isoform X1 [Propithecus coquereli]. 85..99

MDPGQQQPPQAPQGGQQAQTPQGGQPPSGPQPAPPASQAAPQAPPAGHQIVHVRGDSETDLEALF  
NAVMNPKTANVPQTVPMLRKLPLDSFFKPEPKSHSRQASTDAGTAGALTPQHVRHSSPASLQLGAVSPGTLNP  
TGVVSGPAATPAAQHLRQSSFEIPDDVPLPAGWEMAKTSSGQRYFLNHIDQTTTWQDPRKAMLSQMNVTAPTSP  
VQQLNMSASGPLPDGWEQAMTQDGEIYYINHNKNTTSLWDLRDLPRFGKAMNQRISQSAPVKQPPPLAPQSPQG  
GVMGGGNSNQQQMRLQQLQMEKERLRLKQQLLQVVRPQAMRNINPSTANSKQELALRSQLEQDGGTQN  
PVSSPGMSQELRTMTTNSSDPFLNSGTYHSRDESTDSGLSMSSYSVPRTPDDFLNSVDEMDTGDITNQSTLPSQQ  
NRFPDYLEAIPGTNVDLGTLEGDGMNIEGEEMLPSLQEQALSSDILNDMESVLAATKLDKESFLTWL  
PMRLRKLPLDSFFKPP

rs:XP\_012514678 [XP\_012514678] PREDICTED: transcriptional coactivator  
YAP1 isoform X2 [Propithecus coquereli]. 85..99

MDPGQQQPPQPAPQGQGQQAQTPQGQGGPPSGPGQPAPPASQAAPQAPPAGHQIVHVRGDSETDLEALF  
NAVMPKPTANVPQTVPMRLRKLKLPDSFFKPPPEPKSHSRQASTDAGTAGALTPQHVRHSSPASLQLGAVSPGTLNP  
TGVVSGPAATPAAQHLRQSSFEIPDDVPLPAGWEMAKTSSGQRYFLNHIDQTTTWQDPRKAMLSQMNVTAPTSPP  
VQQNLMNSASGPLPDGWEQAMTQDGEIYYINHKNTTSWLDPRLDPRFAMNQRISSAPVKQPPPLAPQSPQGGV  
MGGGNSNQQQQMRLQQLQMEKERLRLKQOELLRQVRPQAMRNINPSTANSPKCQELALRSQLPTLEQDGGTQNPV  
SSPGMSQELRTMTTNSDPFLNSGTYHSRDESTDSGLSMSSYSVPRTPDFFLNSVDEMDTGDTINQSTLPSQQNR  
FPDYLEAIPGTNVDLGTLEGDGMNIEGEELMPSLQEQALSSDILNDMESVLAATKLDKESFLTWL  
PMRLRKLKLPDSFFKPP

rs:XP\_012514679 [XP\_012514679] PREDICTED: transcriptional coactivator  
YAP1 isoform X3 [Propithecus coquereli]. 85..99

MDPGQQQPPQPAPQGQGQQAQTPQGQGGPPSGPGQPAPPASQAAPQAPPAGHQIVHVRGDSETDLEALF  
NAVMPKPTANVPQTVPMRLRKLKLPDSFFKPPPEPKSHSRQASTDAGTAGALTPQHVRHSSPASLQLGAVSPGTLNP  
TGVVSGPAATPAAQHLRQSSFEIPDDVPLPAGWEMAKTSSGQRYFLNHIDQTTTWQDPRKAMLSQMNVTAPTSPP  
VQQNLMNSASGPLPDGWEQAMTQDGEIYYINHKNTTSWLDPRLDPRFGKAMNQRISSAPVKQPPPLAPQSPQG  
GVMGGGNSNQQQQMRLQQLQMEKERLRLKQOELLRQAMRNINPSTANSPKCQELALRSQLPTLEQDGGTQNPVSS  
PGMSQELRTMTTNSDPFLNSGTYHSRDESTDSGLSMSSYSVPRTPDFFLNSVDEMDTGDTINQSTLPSQQNRFP  
DYLEAIPGTNVDLGTLEGDGMNIEGEELMPSLQEQALSSDILNDMESVLAATKLDKESFLTWL  
PMRLRKLKLPDSFFKPP

rs:XP\_012514680 [XP\_012514680] PREDICTED: transcriptional coactivator  
YAP1 isoform X4 [Propithecus coquereli].>tr:A0A2K6FBS7\_PROCO [A0A2K6FBS7]  
SubName: Full=Yes associated protein 1  
{ECO:0000313|Ensembl:ENSCOP00000011436}; 85..99

MDPGQQQPPQPAPQGQGQQAQTPQGQGGPPSGPGQPAPPASQAAPQAPPAGHQIVHVRGDSETDLEALF  
NAVMPKPTANVPQTVPMRLRKLKLPDSFFKPPPEPKSHSRQASTDAGTAGALTPQHVRHSSPASLQLGAVSPGTLNP  
TGVVSGPAATPAAQHLRQSSFEIPDDVPLPAGWEMAKTSSGQRYFLNHIDQTTTWQDPRKAMLSQMNVTAPTSPP  
VQQNLMNSASGPLPDGWEQAMTQDGEIYYINHKNTTSWLDPRLDPRFAMNQRISSAPVKQPPPLAPQSPQGGV  
MGGGNSNQQQQMRLQQLQMEKERLRLKQOELLRQAMRNINPSTANSPKCQELALRSQLPTLEQDGGTQNPVSSPG  
MSQELRTMTTNSDPFLNSGTYHSRDESTDSGLSMSSYSVPRTPDFFLNSVDEMDTGDTINQSTLPSQQNRFPDY  
LEAIPGTNVDLGTLEGDGMNIEGEELMPSLQEQALSSDILNDMESVLAATKLDKESFLTWL  
PMRLRKLKLPDSFFKPP

rs:XP\_012514681 [XP\_012514681] PREDICTED: transcriptional coactivator  
YAP1 isoform X5 [Propithecus coquereli]. 85..99

MDPGQQQPPQPAPQGQGQQAQTPQGQGGPPSGPGQPAPPASQAAPQAPPAGHQIVHVRGDSETDLEALF  
NAVMPKPTANVPQTVPMRLRKLKLPDSFFKPPPEPKSHSRQASTDAGTAGALTPQHVRHSSPASLQLGAVSPGTLNP  
TGVVSGPAATPAAQHLRQSSFEIPDDVPLPAGWEMAKTSSGQRYFLNHIDQTTTWQDPRKAMLSQMNVTAPTSPP  
VQQNLMNSASGPLPDGWEQAMTQDGEIYYINHKNTTSWLDPRLDPRFGKAMNQRISSAPVKQPPPLAPQSPQG  
GVMGGGNSNQQQQMRLQQLQMEKERLRLKQOELLRQVRPQELALRSQLPTLEQDGGTQNPVSSPGMSQELRTMTT  
NSDPFLNSGTYHSRDESTDSGLSMSSYSVPRTPDFFLNSVDEMDTGDTINQSTLPSQQNRFPDYLEAIPGTNVD  
LGTLEGDGMNIEGEELMPSLQEQALSSDILNDMESVLAATKLDKESFLTWL PMRLRKLKLPDSFFKPP

rs:XP\_012514683 [XP\_012514683] PREDICTED: transcriptional coactivator  
YAP1 isoform X6 [Propithecus coquereli].>tr:A0A2K6FBT2\_PROCO [A0A2K6FBT2]  
SubName: Full=Yes associated protein 1  
{ECO:0000313|Ensembl:ENSCOP00000011440}; 85..99

MDPGQQQPPQPAPQGQGQQAQTPQGQGGPPSGPGQPAPPASQAAPQAPPAGHQIVHVRGDSETDLEALF  
NAVMPKPTANVPQTVPMRLRKLKLPDSFFKPPPEPKSHSRQASTDAGTAGALTPQHVRHSSPASLQLGAVSPGTLNP  
TGVVSGPAATPAAQHLRQSSFEIPDDVPLPAGWEMAKTSSGQRYFLNHIDQTTTWQDPRKAMLSQMNVTAPTSPP  
VQQNLMNSASGPLPDGWEQAMTQDGEIYYINHKNTTSWLDPRLDPRFAMNQRISSAPVKQPPPLAPQSPQGGV  
MGGGNSNQQQQMRLQQLQMEKERLRLKQOELLRQVRPQELALRSQLPTLEQDGGTQNPVSSPGMSQELRTMTTNS  
SDPFLNSGTYHSRDESTDSGLSMSSYSVPRTPDFFLNSVDEMDTGDTINQSTLPSQQNRFPDYLEAIPGTNVDL  
GTLEGDGMNIEGEELMPSLQEQALSSDILNDMESVLAATKLDKESFLTWL PMRLRKLKLPDSFFKPP

rs:XP\_012514684 [XP\_012514684] PREDICTED: transcriptional coactivator  
YAP1 isoform X7 [Propithecus coquereli]. 85..99

MDPGQQQPPQAPQGGQQAQTPQGQGGPPSGPGQPAPPASQAAPQAPPAGHQIVHVRGDSETDLEALF  
NAVMPKNTANVPQTVPMRLRKLKLPDSFFKPPPEPKSHSRQASTDAGTAGALTPQHVRHSSPASLQLGAVSPGTLNP  
TGVVSGPAATPAAQHLRQSSFEIPDDVPLPAGWEMAKTSSGQRYFLNHIDQTTTWQDPRKAMLSQMNVTAPTSPP  
VQQNLMNSASGPLPDGWEQAMTQDGEIYYINHKNKTTSWLDPRLDPRFGKAMNQRISSAPVKQPPPLAPQSPQG  
GVMGGGNSNQQQMRLQQLQMEKERLRLKQOELLRQELALRSQLPTLEQDGGTQNPVSSPGMSQELRTMTTNSSD  
PFLNSGTYHSRDESTDSGLSMSSYSVPRTPDDFLNSVDEMDTGDITINQSTLPSQQNRFPDYLEAIPGTNVDLGLT  
EGDGMNIEGEELMPSLQEQALSSDILNDMESVLAATKLDKESFLTWL PMRLRKLKLPDSFFKPP

rs:XP\_012514685 [XP\_012514685] PREDICTED: transcriptional coactivator  
YAP1 isoform X8 [Propithecus coquereli]. 85..99

MDPGQQQPPQAPQGGQQAQTPQGQGGPPSGPGQPAPPASQAAPQAPPAGHQIVHVRGDSETDLEALF  
NAVMPKNTANVPQTVPMRLRKLKLPDSFFKPPPEPKSHSRQASTDAGTAGALTPQHVRHSSPASLQLGAVSPGTLNP  
TGVVSGPAATPAAQHLRQSSFEIPDDVPLPAGWEMAKTSSGQRYFLNHIDQTTTWQDPRKAMLSQMNVTAPTSPP  
VQQNLMNSASGPLPDGWEQAMTQDGEIYYINHKNKTTSWLDPRLDPRFAMNQRISSAPVKQPPPLAPQSPGGV  
MGGGNSNQQQMRLQQLQMEKERLRLKQOELLRQELALRSQLPTLEQDGGTQNPVSSPGMSQELRTMTTNSSDPF  
LNSGTYHSRDESTDSGLSMSSYSVPRTPDDFLNSVDEMDTGDITINQSTLPSQQNRFPDYLEAIPGTNVDLGLTEG  
DGMNIEGEELMPSLQEQALSSDILNDMESVLAATKLDKESFLTWL PMRLRKLKLPDSFFKPP

rs:XP\_002169246 [XP\_002169246] PREDICTED: uncharacterized protein  
LOC100210921 [Hydra vulgaris]. 190..204

MINEDVLATKLENDKSDKDSGLIDDYIDFQLISEAFNVLPDEKTLSDIDYDLELDLSDENFGSYNDFIV  
DNHEASKTCKVDSNNNTNSNINTKKIGVEENFVISTDNKNTLLPGKYREFTKEQARQWRKRILNTYNQNTIKKK  
DHSVRVLPNNKQLPLFNVPSKPTVQEKLDPLLAGEKIGANRGPVPMKHRALPQSFWKEPQAPQSSSLAGSHYSV  
LPPLFASDESSNIQDMRPVTPPEETNRSRPHKKKVVSEKADTALLFSLFDHLENKIDKLVKRGKPKQSTQDQ  
KQTTKQKPKSNNISKDNDPCIVDALADKLFPELSLHQAKEKINNLAAIKIGKQSTIVQFPAVNHNYPEIHQNY  
SEMLNELIAHM PMKHRALPQSFWKEP

rs:XP\_012560142 [XP\_012560142] PREDICTED: transcriptional coactivator  
YAP1-like isoform X2 [Hydra vulgaris]. 43..57

MDMNSTQRQGNFVHLVRQDSDTDLQLEFKNSVSTNKDIPRSKPFDRKLPASFFRPPPSLETQTAPIH  
TRARSLPSNIGQIAQDQVILQQQQHQHPQNNFLLTPSHQRTQSYGTLESNYLPSGCEMRTTASGQNHQNSTS  
WQDPRKAQSMVLPANPQNLLMDDLPEGWERAVTAEGEVYFINHQTKTTSWFDPRLNRPNNNLLGGTNIQYYQQ  
EKRRHQQQIQNQLLREFLIHQRMNGQHTDSVLNNSLNNLVREKYTAHMNSSVLGRGSSVDSGLDGMESYLTS  
TSTDGLNDMDTADVDRNNQFDKNTSMEQGICFNNRLEPFFDLSLQASNVLDLILEDGSELSSDLEAINTEALNDVD  
MILSPNNKPNAYMTWL PFRDRKLPASFFRPP

rs:XP\_004649371 [XP\_004649371] PREDICTED: protein **FAM181A** [Jaculus  
jaculus]. 129..143

MAADSDVKTLLSFVNLASSDIKAALDKSAPCRRSVDHRKYLQKQLKRFSQRCPRLPRLPGLPGRVAEPHLQ  
RGPEDRPTLPLHLGPDSSLDLAGGCKEQALGGPFREECLSMESLRGPSPEAARPGQVPMRKRQLPASFWEEP  
PHTSYPMGLEVGFSRETPPYESKKNCKGLES LGPDTAPVPMSPRALADKEPLRMPGVSLVGCLDAWCCPFQYH  
GQPIFPCPPGALPQGPMPNLGLWRTSPTLPGELAHFCKDQVSSGPKVYRPVVLKPIPTKAMPPIIFNVFGYL  
PMRKRQLPASFWEEP

rs:XP\_004658183 [XP\_004658183] PREDICTED: protein **FAM181B** [Jaculus  
jaculus]. 117..131

MAVQAALLSSHPFVPGFGGSADGLGGAFGAALPGCCFEDDESAAAGALLSGAEGGDVREATRDLLS  
FIDSASSNIKLALDKPGKSKRKVNHRKYLQKQIKRCSVSAVPGTKKVPRLRARNLPPSFFTEPSRTAGGVGCGPS  
GPGVSLGDLEKGAEEFFELLAPDYGGGGDAGVLLSAEPLDVFPAAAGLRGPLELEPGLFEPPPAVVENLLYP  
EPWSAPSCPQTKKPPQAAARAGGLTLNEPLRPLYPAAAADSPGAEDAPAGPLASLAPFFPDCALPPPPLSYDYG  
GAGYGRGAFSGLWRPDGAWGAPGDEAPHRD PLRARNLPPSFFTEP

rs:XP\_004661968 [XP\_004661968] PREDICTED: transcriptional coactivator  
YAP1 [Jaculus jaculus]. 13..27

MNPKTANVPQTVPMRLRKLKLPDSFFKPPPEPKPHSRQASTDAGTAEALIPQSIHVRHSSPASLQLGAVSP  
GTLTPTGVVSGPAGTPAAQHLRQSSFEIPDDVPLPAGWEMAKTSSGQRYFLNHIDQTTTWQDPRKAMLSQMNVAA  
PPSSAVQQNMSPASGPLPDGWEQALTQDGEIYYINHKNKTTSWLDPRLDPCFAMNQRISSAPVKQPPPLAPQS  
PQGGVMGGGSSNQQQMRLQQLQMEKERLRLKQOELLRQAMRNINPSTANSPKQELALRSQLPTLEQDGGTQNP  
VSSPGMSQELRTMTTNSSDPFLNSGTYHSRDESTDSGLSMSSYSVPRTPDDFLNSVDEMDTGDITINQSTLPSQQS

RFPDYLEAIPGTNVDLGTLEGDGMNIEGEEELMPSLQEQALSSDILNDMESVLAATKLDKESFLTWL  
PMRLRKLPSFFKPP

rs:XP\_012791995 [XP\_012791995] hypothetical protein MS3\_00346  
[Schistosoma haematobium].>tr:A0A094ZHC0\_SCHHA [A0A094ZHC0] SubName:  
Full=Uncharacterized protein {ECO:0000313|EMBL:KGB32229.1}; 38..52  
MEGYDSRKPPSVRVTVLEDPNSSLQELFNPASQRQVPLHQRLPKSFFVPPGDVNDNSRLSKLNSVHS  
NERNSADVFVHFSKANSSPACLDAALRTSVSANVPNHSHQKSLDVASKYKTEFSPDFAFSGSCSPGLFQGGQRFDP  
RIPEKFQKWGMTPEELEQVHLRYAKQFLCTIPSSNLNVCVQVQVGEFIKILYDMSAR PLHQRLPKSFFVPP

rs:XP\_004698832 [XP\_004698832] PREDICTED: protein **FAM181A** [Echinops  
telfairi]. 131..145  
MASDSDVKMLLNFNVLASSDIKAALDKSAPCRRSVDHRKYLQKQLKRFSQKYSRLPRGLPGRADPHTK  
RGLEDRPARLPVDGQVPCPAVGRGCQEKALGNPAAGGEVLPLQEQTLQGHAAAAQPGQVPMRKRQLPASFWKE  
PRPVHSFPLGLEGLGPGEGPPYEGKQTCQGLEPLAPGSPRTLVEERLKVPAVARGGRINTWSCCPFYHGQPMY  
PGPPGSLPQGAVPSFGLWRASLSPAELDGPQKQVYRPVVLKPIPTKPALAPPFIENVFGYL  
PMRKRQLPASFWKEP

rs:XP\_012870448 [XP\_012870448] PREDICTED: protein **FAM181A** [Dipodomys  
ordii].>tr:A0A1S3F1G0\_DIPOR [A0A1S3F1G0] SubName: Full=protein **FAM181A**  
{ECO:0000313|RefSeq:XP\_012870448.1}; 129..143  
MAADSDVKMLLNFNVLASSDIKAALDKSAPCRRSVDHRKYLQKQLKRFSQKYSRLPRGLPGRGAEPHLK  
RGPEDRPRRLPLHLGPDSPSGSGGYKEKALGHFPFRQECPLTELALHGQSPEAAKPGQVPMRKRQLPASFWEEP  
PTHSYAVGLEGLGSREGPPYENKKTCHGLEPLGLESTVPVMSPRVPADKNPLGMPGMSLGGMRDAGCCPFQYH  
GQPIFPGPPGTLQSPVPSLGLWRKSPASPGELVHFCKDVGDPGQKQVYRPVVLKPIPTKAMPPIFNVFGYL  
PMRKRQLPASFWEEP

rs:XP\_012869428 [XP\_012869428] PREDICTED: protein **FAM181B** [Dipodomys  
ordii].>tr:A0A1S3EYD7\_DIPOR [A0A1S3EYD7] SubName: Full=protein **FAM181B**  
{ECO:0000313|RefSeq:XP\_012869428.1}; 141..155  
MAVQAALLSTHPVFPFGGPGQDGLGSAFAGLDKCCFEDEETGAPTGALLSGAEGDLREATRDLLSF  
IDSASSNIKLALDKPGKSKRKNVHRKYLQKQIKRCSGLMGAAPPGPSAGGAGGDAAGPAGGTPAPGARKVPLRA  
RNLPPSFFTEPSRAGGGSSGCSPSGSGVSLGDLEKGAEEVEFFELLGSDYGTGAEAGVLLAAEPLDVFPAAGAVL  
RAPLELEPGLFEPFPALVGNLLYPDPWSTPSGPPTKSSSLTAARGGLTLNEPLRPLYPAAAAADVPGAEDGPGHL  
ASFAPFFADCALPPAPPQVSYDYSAGYSRTAYASLWRQDGVWEGAPGEEGTHQD PLRARNLPPSFFTEP

rs:XP\_013084689 [XP\_013084689] PREDICTED: transcriptional coactivator  
YAP1-like [Biomphalaria glabrata].>tr:A0A2C9JV78\_BIOGL [A0A2C9JV78]  
SubName: Full=Uncharacterized protein {ECO:0000313|VectorBase:BGLB008553-  
PB}; 41..55  
MSQDRTGPIVHVRENSDTELEALFNIAMNPSLSETHNKTVPLMRNLPASFFRPPEPPKMQQPLGVSK  
DNTIDAPGYHGAVNSSSMNIAHTRAHSSPASLQQLSAAPPPPTSHVRQHSYDALDEQPLPAGWDMAKTPQGQR  
YYLNHVQLITWNDPRKTHSTNPATISSNNNNNNNTTNSLNSLPQTGSPAPSTQPTLTAPINVDKVLPPGWER  
AYTAECEVYFINHIERTTSWFHPSIPVHLQRPGMKFQSQNATSGSNLLTSQQDQLKQLKLQQLQMEQEALKKRQD  
EIARQEMALRAQVGESVLGTPGDITSLSQSSELTDPFFGQTGTSDHHSRQESADSGLGGMGTSYSLPRTPDDFL  
GNMEDMDTQDGGPKLSGQSDFGSMDMGGVSDVGDHLNMDSDDLVPSLQEEISSSELLKDVEKVLGNKDHPLTWL  
PLMRNLPASFFRPP

rs:XP\_018100216 [XP\_018100216] PREDICTED: transcriptional coactivator  
YAP1-A isoform X1 [Xenopus laevis]. 54..68  
MEPGSQQQPSAPAQQPPPVGHQVVHVRTDSETDLEALFNAVMPKNNANLPQTLPMRMRKLPSFFKQPQ  
PEAKSHSRQASTDGGGAGALTPQHVRHSSPASLQLAAVSPGALSPQGVVVTGLAPPSAPHLRQSSYEIPDDVPLP  
PGWEMAKTPSGQRYFLNHIDQTTTWDPRKAMLSQINVTAPTSPVQNNIMTPTGPLPDGWEQALTPEGEAYFIN  
HKNKSTSWLDPRLDPRFAMNQRLSQNAPVKAPPALPPSPQTGVLGSGGNQQMRLQQLQMEKERLRLLKHQELLR  
QELALRSQIIPMEQDGGTQNPVCTTGISQELRTMTMNSSDPFLNSGTYHSRDESTDSGLSMSSYSVPRTPDDFLN  
SVDEMGTGEAITQSTIPTQNRFPDYLETLPGTNVDLGTLEGEAMNVEGEEELMPSLQEQALSSDILNDMETVLAAT  
KLDKESFLTWL PMRMRKLPSFFKQP

rs:XP\_018100217 [XP\_018100217] PREDICTED: transcriptional coactivator  
YAP1-A isoform X2 [Xenopus laevis].54..68

MEPGSQQQPSAPAQQPPPVGHQVVHVRTDSETDLEALFNAMNPKNANLPQTLPMRMRKLPDSFFKQPQ  
PEAKSHSRQASTDGGSSAGALTPQHVRHSSPASLQLAAVSPGALSPQGVITGLAPPSAHLRQSSYEIPDDVPLP  
PGWEMAKTPSGQRYFLNHIDQTTTWQDPRKAMLSQINVTAPTSPVQONIMTPTAMNQQRLSQNAVPKAPPALPP  
PSPQTGVLGSGGNQQMRLQQLQMEKERLRLKHQELLRQVRPQELALRSQIPPMEQDGGTQNPVCTTGISQELRTM  
TMNSSDPFLNSGTYHSRDESTDSGLSMSSYSVPRTDPDFLNSVDEMMDTGEAITQSTIPTQQRNRPDYLETLPGTN  
VDLGTLEGEAMNVEGEELMPSLQEQALSSDILNDMETVLAATKLDKESFLTWL PMRMRKLPDSFFKQP

rs:XP\_018100218 [XP\_018100218] PREDICTED: transcriptional coactivator  
YAP1-A isoform X3 [Xenopus laevis].54..68

MEPGSQQQPSAPAQQPPPVGHQVVHVRTDSETDLEALFNAMNPKNANLPQTLPMRMRKLPDSFFKQPQ  
PEAKSHSRQASTDGGSSAGALTPQHVRHSSPASLQLAAVSPGALSPQGVITGLAPPSAHLRQSSYEIPDDVPLP  
PGWEMAKTPSGQRYFLNHIDQTTTWQDPRKAMLSQINVTAPTSPVQONIMTPTAMNQQRLSQNAVPKAPPALPP  
PSPQTGVLGSGGNQQMRLQQLQMEKERLRLKHQELLRQELALRSQIPPMEQDGGTQNPVCTTGISQELRTMTMNS  
SDPFLNSGTYHSRDESTDSGLSMSSYSVPRTDPDFLNSVDEMMDTGEAITQSTIPTQQRNRPDYLETLPGTNVDL  
GTLEGEAMNVEGEELMPSLQEQALSSDILNDMETVLAATKLDKESFLTWL PMRMRKLPDSFFKQP

rs:XP\_018103334 [XP\_018103334] PREDICTED: protein **FAM181B**-like [Xenopus  
laevis].>tr:A0A1L8HJT7\_XENLA [A0A1L8HJT7] SubName: Full=Uncharacterized  
protein {ECO:0000313|EMBL:OCT96352.1}; 158..172

MAVQAPIMNHQFMSLYIPASIADYEKSYQEGVDYLGAVESGDFKETTCDLLSFINTASSNIKMALDKPV  
KSKRQVNRKYLQKQIKRCTGLMGSGNLNQGSPKRSPTSPGNSSMSPSGFPCKPPTKRDSQSNMQSKSLAALFD  
SAKEIRGERCKKVLNRNLPPSFFTEPETPSLGLLSNSGVALRDLGKCNQETLEFFDFLNSDYNNTSDQEI IQG  
ASVRVHQDVSAEQSLYEPHLLSGFLYSDMWNPCNQVKKSPVGSCLNGFNETLKSAPLQALYPNNQDPAMASPV  
DDTCPNLTTYTPCFPSDCSLPQIFDYDYNQNCNRISYPVM PLRNRNLPPSFFTEP

rs:XP\_018103464 [XP\_018103464] PREDICTED: transcriptional coactivator  
YAP1-B isoform X1 [Xenopus laevis].>tr:A0A1L8HAQ0\_XENLA [A0A1L8HAQ0]  
SubName: Full=Uncharacterized protein {ECO:0000313|EMBL:OCT93187.1};  
54..68

MEPGSQQQPSAPGQQPPPVGHQIVHVRTDSETDLETLFNAMNPKNANVPQTLPMRMRKLPDSFFKQPE  
PKSHSRQASTDGGSSAGALTPQHVRHSSPASLQLGAVSPGALSPQGVITGLAPPSAQHLRQSSYEIPDDVPLPPG  
WEMAKTPSGQRYFLNHVDQTTTWQDPRKAMLSQINVTAPTSPVQONIMTPTGPLPDGWEQALTPEGETYFINHK  
NKTTSWLDPRLDPRFAMNQQRLSQSAPVKSPALQPQSPPSGVLGSGGNQQMRLQQLQMEKERLRLKHQELLRQV  
RPQELALRSQIPPMEQDSGPPNPVCSSGISQELRTMTMNSSDPFLNSGTYHSRDESTDSGLSMSSYSVPRTDPDF  
LNSVDEMMDTGEAITQSTIPTQQRNRPDYLETLPGTNVDLGTLEGEAMNVEGEELMPSLQEQALSSDILNDMETVLA  
ATKLDKESFLTWL PMRMRKLPDSFFKQP

rs:XP\_018103465 [XP\_018103465] PREDICTED: transcriptional coactivator  
YAP1-B isoform X2 [Xenopus laevis].54..68

MEPGSQQQPSAPGQQPPPVGHQIVHVRTDSETDLETLFNAMNPKNANVPQTLPMRMRKLPDSFFKQPE  
PKSHSRQASTDGGSSAGALTPQHVRHSSPASLQLGAVSPGALSPQGVITGLAPPSAQHLRQSSYEIPDDVPLPPG  
WEMAKTPSGQRYFLNHVDQTTTWQDPRKAMLSQINVTAPTSPVQONIMTPTGPLPDGWEQALTPEGETYFINHK  
NKTTSWLDPRLDPRFAMNQQRLSQSAPVKSPALQPQSPPSGVLGSGGNQQMRLQQLQMEKERLRLKHQELLRQV  
LALRSQIPPMEQDSGPPNPVCSSGISQELRTMTMNSSDPFLNSGTYHSRDESTDSGLSMSSYSVPRTDPDFLNSV  
DEMMDTGEAITQSTIPTQQRNRPDYLETLPGTNVDLGTLEGEAMNVEGEELMPSLQEQALSSDILNDMETVLAATK  
LDKESFLTWL PMRMRKLPDSFFKQP

rs:XP\_018103466 [XP\_018103466] PREDICTED: transcriptional coactivator  
YAP1-B isoform X3 [Xenopus laevis].54..68

MEPGSQQQPSAPGQQPPPVGHQIVHVRTDSETDLETLFNAMNPKNANVPQTLPMRMRKLPDSFFKQPE  
PKSHSRQASTDGGSSAGALTPQHVRHSSPASLQLGAVSPGALSPQGVITGLAPPSAQHLRQSSYEIPDDVPLPPG  
WEMAKTPSGQRYFLNHVDQTTTWQDPRKAMLSQINVTAPTSPVQONIMTPTAMNQQRLSQSAPVKSPALQPQ  
PSPGVLGSGGNQQMRLQQLQMEKERLRLKHQELLRQVRPQELALRSQIPPMEQDSGPPNPVCSSGISQELRTMT  
NSSDPFLNSGTYHSRDESTDSGLSMSSYSVPRTDPDFLNSVDEMMDTGEAITQSTIPTQQRNRPDYLETLPGTNVD  
LGTLEGEAMNVEGEELMPSLQEQALSSDILNDMETVLAATKLDKESFLTWL PMRMRKLPDSFFKQP

rs:XP\_018103467 [XP\_018103467] PREDICTED: transcriptional coactivator YAP1-B isoform X4 [Xenopus laevis]. 54..68

MEPGSQQQPSAPGQQPPVGHQIVHVRTDSETDLETFLFNAVMPKNNANVPQTLPMRMRKLPDSFFKQPE  
PKSHSRQASTDGGSSAGALTPQHVRHSSPASLQLGAVSPGALSPOGQVITGLAPPSAQHLRQSSYEIPDDVPLPPG  
WEMAKTPSGQRYFLNHVDQTTTWDQPRKAMLSQINVTAPTSPVQONIMTPTAMNQQRLSQSAPVKSPALQPQS  
PPSGVLGSGGNQOMRLQQLQMEKERLRLKHQELLRQELALRSQIPPMEQDSGPPNPFVCSGSGISQELRTMTMNSSD  
PFLNSGTYHSRDESTDSGLSMSSYSVPRTPDDFLNSVDEMMDTGEAITQSTIPTQQRNRPDYLETLPGTNVDLGTL  
EGEAMNVEGEELMPSLQEQALSSDILNDMETVLAATKLDKESFLTWL PMRMRKLPDSFFKQP

rs:XP\_018105870 [XP\_018105870] PREDICTED: protein **FAM181B**-like [Xenopus laevis]. 158..172

MAVQSPIMNHQFLSLYIPGSIVDYEKRYQEGVDYLGAVESGDFKETTCDLLSFINTASSNIKLALDKPG  
KSKRKVNHRKYLQKQIKRCTGLMGSGNINQGSFKRSPTSPGNSSMTPSGFPWKPPTKRSTQSNLQSKSLAALFD  
NVKEIRDERCKKVLNRNRLPPSFFTEPESSPCSGLLNSGVALRDLGKCNQETLELFDLGLSDYNNMSEQEIIQG  
ASVRLHQDVSVEQSLYEPHLLNGLFYSDMWNPCNQVKSSVGTGNLGLNETLKSAPLQALYTNNDPTMDSTM  
DESCPSLTTYTPCFPSDCSLPQIFDYNTQNCNRISYPVM PLNRNRLPPSFFTEP

rs:XP\_018085938 [XP\_018085938] PREDICTED: protein **FAM181A**-like [Xenopus laevis].>rs:XP\_018085939 [XP\_018085939] PREDICTED: protein **FAM181A**-like

[Xenopus laevis].>tr:A0A1L8F9M8\_XENLA [A0A1L8F9M8] SubName: Full=Uncharacterized protein {ECO:0000313|EMBL:OCT68267.1}; 121..135

MLKVMASDSEVKTLNLFVNLASCDIKAALDKSAPCRRSVDHRKYLQKQLKRFSQKYSRLPRCTPSKSVSD  
LRKCLLDRQNTTTLNGLSEKATHALETEENINKVTCTQENITEAGNPDQVPMRKRQLPASFWEEPSPSSSLEL  
HCPSRPDIYKESTDASLTLYETKRGKMLMTHESNSSACFYPSSEDKESGKLPVSVASLTELNVNACSCCPFYHGQA  
MYQHYPGELSPNPFALTTLWSKSTVPTLEIQHLCKESGQRIYRHVVLPKPIPTKPAVHSSLFNVFGYI  
PMRKRQLPASFWEEP

rs:XP\_018087898 [XP\_018087898] PREDICTED: protein **FAM181A**-like [Xenopus laevis].>tr:A0A1L8F0D9\_XENLA [A0A1L8F0D9] SubName: Full=Uncharacterized

protein {ECO:0000313|EMBL:OCT65057.1}; 114..128

MASDSEVRTLLNLFVNLASCDIKAALDKSAPCRRSVDHRKYLQKQLKRFSQKYSRLPRCTPSKSVDLRKS  
LLDRQNTTTLNGLSDKATHLENINKDTCAQENSTEAGSPDQVPMRKRQLPASFWEEPSPSSSLELHCPSQPD  
IIYKESTDTSPLYETRRGNVVIHSHSSASFYPSSEDKESGKLPVSVASLTELNVNACSCCPFYHGQAMYQHYPG  
ELSPNPFGLTLWNKSTVPTLEIQHLCKESSQRIYRHVVLPKPIPTKPAVHSSLFNVFGYI  
PMRKRQLPASFWEEP

rs:XP\_019305497 [XP\_019305497] PREDICTED: protein **FAM181B** [Panthera pardus].>rs:XP\_025784993 [XP\_025784993] protein **FAM181B** [Puma concolor].

221..235

MAVQAALLSTHPFVFPFGGGSPDGLGGAFGALDKGCCFEDDETGTTPAGELLAGNEGDMREATRDLLSF  
IDSASSNIKLALDKPGKSKRKVNHRKYLQKQIKRCSGLMGAAPPSPGAAADTPAKRPLAAPSAQAVAVPPHGK  
AVPRREASQAAAAASLQSRSLAALFDSLHRVPGDTERAGGSLAAPAAGLGGAGAGGSGGEAAGTAGGTAVPGARK  
VPLRARNLPPSFFTEPSRAGGGGCGPSGPGVSLGDLEKGAEALEFFELLGPDYAGGTEASVLLAAEPLDVFPFTA  
AVLRGPPELEPGLFEPAMVGSLLYSESWSAPGCPQTKKPLAAPRGGLTLNEPLRPLYPASAADSPGAEDGPG  
LASFAPFFSDCALPAPPPHQSVDYSAGYSRTAYSSLRPDGVWEGAPGEEGAHRD PLRARNLPPSFFTEP

rs:XP\_019317687 [XP\_019317687] PREDICTED: protein **FAM181A** isoform X1 [Panthera pardus]. 228..242

MLCIWRGAPDWPEGPPSAGDSSSIQPTRGLHDCFQPDARSSPATPGLAQVCRGEPARPRRRGARGRPAP  
SVSSVSPGAASHEQNPPASWKAPCSGLLMANDSDVKMLNLFVNLASSDIKAALDKSAPCRRSVDHRKYLQKQL  
KRFSQKYSRLPRGLPGRGAEPHLKRGPEDRPGRPLPLDSGHSSPPGGGGCKEKALGNPYREECLSKEQTLQGNP  
EAARPGQVPMRKRQLPASFWEEPETHSYPLGLDGGPGPREGPPYEGKKHCKGLEPLDPETAPVPASPRAPAEKE  
PLKMSGVSLVGRVNAWCCPFQYHGQPVYPGPPGALPQSPVPLSLWRKSPASPGELAHFCKDQVDPGQKQVYRPV  
VLKPIPTKPAVPPPIFNVFGYL PMRKRQLPASFWEEP

rs:XP\_019317688 [XP\_019317688] PREDICTED: protein **FAM181A** isoform X2 [Panthera pardus]. 207..221

MLCIWRGAPDWPEGPPSAGDSSSIQPTRGLHDCFQPDARSSPATPGLAQVSSVSPGAASHEQNPPASW  
KAPCSGLLMANDSDVKMLNLFVNLASSDIKAALDKSAPCRRSVDHRKYLQKQLKRFSQKYSRLPRGLPGRGAEP

HLKRGPEDRPGRLPLDSGHDSPPGGGGGCKEKALGNPYREECLSKEQTLQGQNPEAARPGQVPMRKRQLPASFWEE  
EPRATHSYPLGLDGGPGPREGPPYEGKKHCKGLEPLDPETAPVPASPRAPAEKEPLKMSGVSLVGRVNAWSCC  
PFQYHGQPVYPPGPPGALPQSPVPLSLWRKSPASPGELAHFCKDVGDPGQKVYRPPVVLKPIPTKPAVPPPIFN  
VFGYL  
L PMRKRQLPASFWEEP

rs:XP\_019317689 [XP\_019317689] PREDICTED: protein **FAM181A** isoform X3  
[Panthera pardus].>rs:XP\_019317690 [XP\_019317690] PREDICTED: protein  
**FAM181A** isoform X3 [Panthera pardus].>rs:XP\_019317691 [XP\_019317691]  
PREDICTED: protein **FAM181A** isoform X3 [Panthera pardus]. 129..143

MANDSDVKMLLNFNVLASSDIKAALDKSAPCRRSVDHRKYLQKQLKRFSQKYSRLPRGLPGRGAEPHLK  
RGPEDRPGRLPLDSGHDSPPGGGGGCKEKALGNPYREECLSKEQTLQGQNPEAARPGQVPMRKRQLPASFWEEPR  
ATHSYPLGLDGGPGPREGPPYEGKKHCKGLEPLDPETAPVPASPRAPAEKEPLKMSGVSLVGRVNAWSCC  
PFQYHGQPVYPPGPPGALPQSPVPLSLWRKSPASPGELAHFCKDVGDPGQKVYRPPVVLKPIPTKPAVPPPIFN  
VFGYL  
L PMRKRQLPASFWEEP

rs:XP\_013366580 [XP\_013366580] PREDICTED: transcriptional coactivator  
YAP1 [Chinchilla lanigera]. 75..89

MDPGPPPQPAPPAPGPGPAPAPAGPPAPPAQAAPPPPPAGHQVVHVRGDSETDLEALFNAVMPNPKTAN  
VPQTVPMRLRKLPLDSFFKPPPEPKAHSRQASTDAGTAGALTPQHVRHSSPASLQLGAVSPGTLTPTGTVVSGPAAT  
PAAQHLRQSSFEIPDDVPLPAGWEMAKTSSGQRYFLNHIDQTTTWQDPRKAMLSQMNVPAPTSPPVQQLMNSAS  
GPLPDGWEQAMTQDGEIYYINHKNKTTSWLDPRLDPRFAVNQRISQSAPVKQPPPLAQSPQGGVMGGSSSNQQQ  
QMRLOQLQMEKERLRLKQOELLRQAMRNINPSTANSKQELALRSQLEPTLEQDGGTQNPVSSPGMSQELRTMTT  
NSSDPFLNSGTYHSRDESTDSGLSMSSYSVPRTPDDFLNSVDEMMDTGTINQSTLPSQQSRFPDYLEAIPGTNVD  
LGTLEGDGMNIEGEEMLPSLQEQALSSDILNDMESVLAATKLDKESFLTWL PMRLRKLPLDSFFKPP

rs:XP\_005390409 [XP\_005390409] PREDICTED: protein **FAM181A** isoform X1  
[Chinchilla lanigera]. 169..183

MPQAGLGPPLCQPRTLLGVACPPKSAPSSWKAPCSGPLVMASDSDVKMLLNFNVLASSDIKAALDKS  
APCRRSVDHRKYLQKQLKRFSQKYSRLPRGLPGRAAEPHLRRGPEHDHPGQLPLHPSVPCGPDPSPPGGGGGCKEKA  
LGSFPGEECLSKEQGPEAAKPGQVPMRKRQLPASFWEEPRPHTSYPMGLEGLPVIREGPPYESSKNCKGLESVVP  
EAAPGPMSPRALVDKEPLKMPGVSLVGSVDAWSSCCPFQYHGQPIYPPGPPGALPASPIPLGLLWRKSPALPAELAH  
FCEHVDGPGQKVYRPPVVLKPIPTKPTVPPPIFNVFGYL PMRKRQLPASFWEEP

rs:XP\_013372688 [XP\_013372688] PREDICTED: protein **FAM181A** isoform X2  
[Chinchilla lanigera].>rs:XP\_005390410 [XP\_005390410] PREDICTED: protein  
**FAM181A** isoform X2 [Chinchilla lanigera].>rs:XP\_005390411 [XP\_005390411]  
PREDICTED: protein **FAM181A** isoform X2 [Chinchilla lanigera]. 128..142

MASDSDVKMLLNFNVLASSDIKAALDKSAPCRRSVDHRKYLQKQLKRFSQKYSRLPRGLPGRAAEPHLR  
RGPEDHHPGQLPLHPSVPCGPDPSPPGGGGGCKEKALGSFPGEECLSKEQGPEAAKPGQVPMRKRQLPASFWEEPRP  
HTSYPMGLEGLPVIREGPPYESSKNCKGLESVVPAAAPGPMSPRALVDKEPLKMPGVSLVGSVDAWSSCCPFQYHG  
QPIYPPGPPGALPASPIPLGLLWRKSPALPAELAHFCEHVDGPGQKVYRPPVVLKPIPTKPTVPPPIFNVFGYL  
L PMRKRQLPASFWEEP

rs:XP\_014043521 [XP\_014043521] PREDICTED: protein **FAM181A**-like [Salmo  
salar].>rs:XP\_014043558 [XP\_014043558] PREDICTED: protein **FAM181A**-like  
[Salmo salar].>tr:A0A1S3QTX3\_SALSA [A0A1S3QTX3] SubName: Full=protein  
**FAM181A**-like {ECO:0000313|RefSeq:XP\_014043521.1,  
ECO:0000313|RefSeq:XP\_014043558.1}; 125..139

MASADSEVKTLLNFNVLASSDIKAALDKSAPCRRSVDHRKYLQKQLKRFSQKYSRMPRCHTHRSAESGI  
VKAMVDKSSAYSLETILHQSMTPINEKVCSGAQDEENIRMGQNPIADSANSKQDQVPMRKRQLPASFWEEPRLAQT  
NTEPSLYGWNKSQGVTRINRVEKRIKHNHQPKPTLFQSNRLVSVEKEPLNVDLVSHNVSVCGCCPFQYHGHHVFEQ  
SHIVVPSTVGLWGKAAVAEIEPTDMAHGHNNTQTHVVVKPIPTKPTVPSIFSVFVGFIF  
L PMRKRQLPASFWEEP

rs:XP\_014066267 [XP\_014066267] PREDICTED: protein **FAM181A**-like [Salmo  
salar].>tr:A0A1S3SPJ8\_SALSA [A0A1S3SPJ8] SubName: Full=protein **FAM181A**-like  
{ECO:0000313|RefSeq:XP\_014066267.1}; 125..139

MASADSEVKTLLNFNVLASSDIKAALDKSAPCRRSVDHRKYLQKQLKRFSQKYARMRCHTHRSTESGI  
AKDVVNKSSAYSLETIHPSTTRINEKGGSDAQDVENARMAQTPTVSDNSKQEQVPMRKRQLPASFWEEPRLAQT

NTDYLQYGWKKSHGVTGTNEVEKIKKAHEEPTPTLFLSNRRGSVEKEPLKLDVASHNVNVCGFQYHGHHVFQ  
SHIVVPQSAVGLWGKATVAETATPDIAHRHKNYTHVVVKPIPTKPTVPPSIFNVFGFI PMRKRQLPASFWEEP

rs:XP\_014071068 [XP\_014071068] PREDICTED: transcriptional coactivator  
YAP1-like [Salmo salar].>tr:A0A1S3T396\_SALSA [A0A1S3T396] SubName:  
Full=transcriptional coactivator YAP1-like  
{ECO:0000313|RefSeq:XP\_014071068.1}; 45..59

MDPSQHNPPAGHQIVHVRGDSETDLEALFNAVMPKNTVGPSPVPMRMRKLPDSFFKPPPEPKSHSRQAS  
TDAGTAGALAPHHVRAHSSPASLQLGAVSPLLGMVPAGAPPSNLRQSSYEIPDDMPLPPGWEVAQTSPSGQRYFLN  
PVVFPVVSALSCSPLSQPCRVPPLSPVVFPPLSALSCSPLSQPCRVPPLSPVVFPPLSALSCSNQQRITQSAP  
GKQGGQLPSRPQSEGVMVGSNQMLRQLQMEKERLRLLKHQELLRTRPQVSRNPYNLT PMRMRKLPDSFFKPP

rs:XP\_014019163 [XP\_014019163] PREDICTED: protein **FAM181B** isoform X1  
[Salmo salar].>tr:A0A1S3NUS8\_SALSA [A0A1S3NUS8] SubName: Full=protein  
**FAM181B** isoform X1 {ECO:0000313|RefSeq:XP\_014019163.1}; 178..192

MAVQTAIMNSPFINFCFPGSVMMEYDMDQSLDGSPLSESEERGEYRETRNLLSFIDSASSNIKLALDK  
PVKSKRKNVNRKYLQKQIKRCTGFISPTGNPVAAPGAGVNRKRKSGFPQTQPQTQPQTQPQTQPGPFQOSKPVH  
KRDGLQANLQTKSLAALFNSVKEPVRGERAKKPLRHRNLPPSFFTEPDNTTTTTTSRVSTSTSGMFLGDLERGGG  
NPDDFDLLGPDYSNMLSDQDVFQNRGLPSRIIDQDMFQNRGLPSRILQHQQTQDITDQVSPYDPHHLVGGFLYTE  
PWSTSSPNKKAGEGVRTGPGTQTPLYCQAGEGVRTGPGTQTPLYCQAGEGVRTGPGPQTPLYCQAGEGVRTGPGP  
QTPLYCQAGEGVQTGPGTQTPLYCHSVSDSSVTGSTEDSNLCTLTFFPNFFPDCSVSQQVSYGLSNGGYNTRDFSS  
L PLRHRNLPPSFFTEP

rs:XP\_014019164 [XP\_014019164] PREDICTED: protein **FAM181B** isoform X2  
[Salmo salar].>tr:A0A1S3NUU6\_SALSA [A0A1S3NUU6] SubName: Full=protein  
**FAM181B** isoform X2 {ECO:0000313|RefSeq:XP\_014019164.1}; 178..192

MAVQTAIMNSPFINFCFPGSVMMEYDMDQSLDGSPLSESEERGEYRETRNLLSFIDSASSNIKLALDK  
PVKSKRKNVNRKYLQKQIKRCTGFISPTGNPVAAPGAGVNRKRKSGFPQTQPQTQPQTQPQTQPGPFQOSKPVH  
KRDGLQANLQTKSLAALFNSVKEPVRGERAKKPLRHRNLPPSFFTEPDNTTTTTTSRVSTSTSGMFLGDLERGGG  
NPDDFDLLGPDYSNMLSDQDVFQNRGLPSRIIDQDMFQNRGLPSRILQHQQTQDITDQVSPYDPHHLVGGFLYTE  
PWSTSSPNKKAGEGVRTGPGPQTPLYCQAGEGVRTGPGPQTPLYCQAGEGVRTGPGTQTPLYCHSVSDSSVTGST  
EDSNLCTLTFFPNFFPDCSVSQQVSYGLSNGGYNTRDFSSL PLRHRNLPPSFFTEP

rs:XP\_014041893 [XP\_014041893] PREDICTED: transcriptional coactivator  
YAP1-like, partial [Salmo salar].>tr:A0A1S3QPA9\_SALSA [A0A1S3QPA9] SubName:  
Full=transcriptional coactivator YAP1-like  
{ECO:0000313|RefSeq:XP\_014041893.1}; 45..59

MDPSQHNPPAGHQIIHVRGDSETDLETLFNAVMPKNTIVPSSVPMRMRKLPDSFFKPPPEPKSHSRQTS  
TDAGTAGAVAPHHVRAHSSPASLQLGTVSPLLGMVPAGPPSHLRQSSYEIPEDMPLPPGWEMAKTPSGQRYFLN  
HLDQSTTWQDPRKALLQMNQAPPTSPVPVQQQNMSPASGPLPDCWEQAITSEGEVYYYINHKNKTTSWLDPRL  
PMRMRKLPDSFFKPP

rs:XP\_014090328 [XP\_014090328] PREDICTED: transcriptional coactivator  
yorkie isoform X1 [Bactrocera oleae]. 59..73

MSLSKTVGSLNKGNAKEKSTSKESNNLVVRIDQSDNNLQALFDSVLNPTESKCPLQVPFRMRQLPESF  
FKPPATASRSPVAHSRANSADSAYDTGSQPNVSQGNISTSSVAAPVATITQPQVTANRLSISHSRAHSSPASLQ  
QTYNVHIGNVMETSACIQDGIGPVFTTGAVFPFPPGVNAGSAVRMEQGDQVPKDPANTIQTFHMKQRSYDVVSTI  
QLQNELGPLPPGWEQAKTNDGQIYYLNHTTKSTQWEDPRIQLKQQIFQDGLSHNVNLSKESVNLADNLGPLPEG  
WEQAYTESGDVYFINHVNRTTSWNDPRIPDFLQKPVKSQKPGPSWLNIOHIEKEQDYFKPSSEQSSLTRQNGSLQ  
MDPFLSGDNHARQESSDGLSLSSNTFSTTADLMPNIDDSMDCISESGSLNALSIGIDCPDNLVSSQLLEDNICNE  
MFSVDVHSMNLNASATKPDTLWDYKIN PFRMRQLPESFFKPP

rs:XP\_014090329 [XP\_014090329] PREDICTED: transcriptional coactivator  
yorkie isoform X2 [Bactrocera oleae]. 59..73

MSLSKTVGSLNKGNAKEKSTSKESNNLVVRIDQSDNNLQALFDSVLNPTESKCPLQVPFRMRQLPESF  
FKPPATASRSPVAHSRANSADSAYDTGSQPNVSQGNISTSSVAAPVATITQPQVTANRLSISHSRAHSSPASLQ  
QTYNVHIGNVMETSACIQDGIGPVFTTGAVFPFPPGVNAGSAVRMEQGDQVPKDPANTIQTFHMKQRSYDVVSTI  
QLQNELGPLPPGWEQAKTNDGQIYYLNHTTKSTQWEDPRIQLKQQIFQDGLSHNEGWEQAYTESGDVYFINHVN  
RTTSWNDPRIPDFLQKPVKSQKPGPSWLNIOHIEKEQDYFKPSSEQSSLTRQNGSLQMDPFLSGDNHARQESSDGS



LSLSSNTFSTTADLMPNIDDSMDCISESGSLNALSIGIDCPDNLVSSLQLEDNICNEMFSDVHSMNLNASATKPDTL  
DWYKIN PFRMRQLPESFFKPP

rs:XP\_014090330 [XP\_014090330] PREDICTED: transcriptional coactivator  
yorkie isoform X3 [Bactrocera oleae]. 59..73

MSLSKTVGSLNKGNAKEKSTSKESNNLVVRIDQSDNNLQALFDSVLNPTESKCPLQVPFMRMRQLPESF  
FKPPATASRSPVAHSRANSADSAYDTGSQPNVSQGNISTSSVAAPVATITQPQVTANRLSISHSRAHSSPASLQ  
QTYNVHIGNVMETSACIQDGIGPVFTTGAVFPFPGVNVAGSAVRMEQGDQVPKDPAPNTIQTFHMKQRSYDVVSTI  
QLQNELGPLPPGWEQAKTNDGQIYYLNHTTKSTQWEDPRIQLKQQIFQDGLSHNVNLSKESVNLADNLGPLPEG  
WEQAYTESGDVYFINHVNRTTWNDRIPDFLQKPVKSQKPGPSWLNIOHIEKEQDYFKPSSEQSSLTRQNGSLQ  
MDPFLSGDNHARQESSDSGLSLSSNTFSTTADLMPNIDDSMDCISA PFRMRQLPESFFKPP

rs:XP\_005926600 [XP\_005926600] PREDICTED: transcriptional coactivator  
YAP1 [Haplochromis burtoni]. 45..59

MDPSQHNPAGHQIVHVRGDSETDLEALFNAMNPKVNTVPHSVPMRMRKLPDSFFKPPPEPKSHSRQAS  
TDAGSAGVLIPIHHVRAHSSPASLQLGAVSGGSLSGMGSTGASPOHLRQSSYEIPDDMPLPDGWEMAKTASGQRYF  
LNHIDQTTTWQDPRKALLQMNQPPAPSSVVPVQPPIMNPASGPLPDGWEQAITAEGEIYYINHKNKTTSWLDPRL  
EPRYALNQQRISQSAVVKQAGQLPPSISGVMGSNNQMRLOMEKERLRQKQOELLRQRPOELALRNQLPTSMDQDG  
STNPVSSPMAQDARTMTANSDDPFLNSGTYHSRDESTDSGLSMSSYSVPRTPDDFLNSVDEMDTGDPLAPSMATQ  
PSRFPDYLDITPGTDVLDLGTLEGESMAVEGEELMPSLQEQALSSDILNDMESVLAATKLDKESFLTWL  
PMRMRKLPDSFFKPP

rs:XP\_008549061 [XP\_008549061] PREDICTED: transcriptional coactivator  
YAP1 [Microplitis demolitor].>rs:XP\_008549062 [XP\_008549062] PREDICTED:  
transcriptional coactivator YAP1 [Microplitis demolitor]. 46..60

MALNQDQDQLSKGNLVVRIDQNSDSLQALFDSVLKPNSTRPLQVPLRMRNLPNSFFNPPSTGSKSPSI  
SHSRENSADSAFGTIVTTNVASGPGASALGSGSEATGGGADAAGTGAAGAAPGLTVAHPRAHSSPASLQQTYASA  
QQATQHTPQPHAPRHHHHQKORSYDVISTVDDMGPLPHGWEQARTPEGQIYFLNHLTRTTTWEDPRKTAADVSA  
AVAAAVESGKASSAAANSLGPLPEGWEQARTPEGEIYFINHQSRRTTSWFDPRIPSHLQRAPTTNTMLPQNWLQQP  
GAPGLQNNQNIQVCQKLRQLQSLQMERERLQKQAEIMRQOELNLLRQSTTDAAMDFFLSGINEQHARQESADSG  
LGLGSAYSLPHTPEDFLSNIDDNMDATSEGGAPMETPDLSTLSDNIDSTDDLVPSSLQLGEEFTSDILDDVQSLIN  
PSSTKPDNVLTLW PLRMRNLPNSFFNPP

rs:XP\_005877902 [XP\_005877902] PREDICTED: protein **FAM181A** [Myotis  
brandtii].>tr:S7NEP9\_MYOBR [S7NEP9] SubName: Full=Protein **FAM181A**  
{ECO:0000313|EMBL:EPQ14920.1}; 129..143

MASDSVDMKLLNFVNLAASSDIKAALDKSAPCRRSVDHRKYLQKQLKRFSQKYSRLPRGLPGRGAEPPLR  
RGPEDRPGRLPLNPGPDASPRSGGDCKEKALGNPYREECLSRQTLQGNPGAARPGQVPMRKRQLPASFWEEP  
PTHSYVPALEGVLGREGPPYECKKHCRGLELFGPDMALIPMSPRALAEKEPPKLPVSVLGRVNAWSCCPFYH  
GQPIYPGPPGALPPGPVPSLGLWRKSPASPGELAHAKDVGPGQKVYRVPVVLKPIPTKPAVPPPIFNVFGYL  
PMRKRQLPASFWEEP

rs:XP\_014695669 [XP\_014695669] PREDICTED: protein **FAM181B**, partial [Equus  
asinus]. 9..23

AVPGARKVPLRARNLPPSFFTEPSRADGGGGCGSPGVPVSLGDLEKGAEAFFELLAPDYGTGTEAGV  
LLAAEPLDVFPPTGAAALRGPPELEPGLFEPPPGMVGSLLYPEPWGAPGCPSTKKPQLAAPRGGLTLNEPLRPLYP  
AAADSPGGEDAPGLLASFAPFFSDCALPPAPPPHQVSYDYSAGYGRATAYSSLWRADAWEWAPGEEGAHRD  
PLRARNLPPSFFTEP

rs:XP\_014687590 [XP\_014687590] PREDICTED: protein **FAM181A** isoform X1  
[Equus asinus]. 159..173

MVRPVPFSGAASPPQNPPSSWKAPCRGPLVMASDSVDMKLLNFVNLAASSDIKAALDKSAPCRRSVDHRK  
YLQKQLKRFSQKYSRLPRGLPGRGAEPHLKRGPEDRPGRLPLGAGQDSSPGGGGSCTEKALGNPYREECLSKQ  
LQGNPEAARPGQVPMRKRQLPASFWEEPPTHSYPLGLEGLGREGPPYEGKHKCKGLEPVGPEPAPVSPR  
APAEKEPLKMPGVSVLGRVNAWSCCPFYHGPPIYPGPPGALPQSPVPSLGLWRKSPASPGELAHFCKDVGPGQ  
KVYRVPVVLKPIPTKPAVPPPIFNVFGYL PMRKRQLPASFWEEP

rs:XP\_014687591 [XP\_014687591] PREDICTED: protein **FAM181A** isoform X2  
[Equus asinus].>rs:XP\_014687592 [XP\_014687592] PREDICTED: protein **FAM181A**

isoform X2 [Equus asinus]. 129..143

MASDSVVKMLLNFNVLASSDIKAALDKSAPCRRSVDHRKYLQKQLKRFSQKYSRLPRGLPGRGAEPHLK  
RGPEDRPGRLPLGAGQDSSPGGGGSCTEKALGNPYREECLSKEQTLQGNPEAARPGQVPMRKRQLPASFWEEP  
PTHSYPLGLEGLGPREGPPYEGKKHCKGLEPVGPEPAPVPASPRAPAEKEPLKMPGVSLVGRVNAWSCCPFYH  
GQPIYPGPPGALPQSPVPSLGLWRKSPASPGELAHFCKDVGPGQKVYRPPVVLKPIPTKPAVPPPIFNVFGYL  
PMRKRQLPASFWEEP

rs:XP\_014739937 [XP\_014739937] PREDICTED: protein **FAM181A** [Sturnus vulgaris]. 127..141

MASDSEVKTLNFNVLASSDIKAALDKSAPCRRSVDHRKYLQKQLKRFSQKYSRIPRCHPSKPPQCGWR  
RAAEDRARGSQPEAPEPSPHGGAAAEKVVTAEAEESLTGERVLQEQKPEAARPDQVPMRKRQLPASFWEEP  
QSLTARAFPASPEGLQAPRDPYEGKSRSPDAAGPESPPDTAPHAGEKDPAGALSGRVGAWTCCPFPCPGP  
VYQPPGALPPSPFPLGLWRKSAAALPAEVPHFGKEADGPGQKLYRPMVLKPIPTKPAIPPIFNVFGYL  
PMRKRQLPASFWEEP

rs:XP\_014742071 [XP\_014742071] PREDICTED: transcriptional coactivator YAP1 isoform X1 [Sturnus vulgaris]. 86..100

MDPGQPQTQQPPQAAQPPASQQQQPPPPQPPGAVSGAPAGAAQPPGAGPPPAGHQIVHVRGDSETDLEAL  
FNAVMNPKGANVPHTLPMRLRKLKLPDSFFKPPPEPKAHSRQASTDAGTAGALTPQHVAHSSPASLQLGAVSPGTLT  
PSGVVTGPGAPSSQHLRQSSFEIPDDVPLPPGWEMAKTPSGQRYFLNHIDQTTTWQDPRKAMLSQMNVTAPTSPS  
VQQNIMNSASGPLPDGWEQAMTQDGEIYYINHKNKTTSWLDPRLDPRFAMNQRIQSAPVKQPPPLAPQSPQGGV  
MGGSSSNQQQQMRLQQLQMEKERLRLKHQELLRQVRPQALRNINPSTANSPKHQELALRSQLPTMEQDGGSQNPV  
SSPGMSQELRTMTTNSDPPFLNSGTYHSRDESTDSGLSMSSYSVPRTPDFFLNSVDEMDTGDSIGQSNIPSHQNR  
FPDYLEAIPGTNVDLGTLEGDGMNIEGEELMPSLQEQALSSDILNDMESVLAATKLDKESFLTWL  
PMRLRKLKLPDSFFKPP

rs:XP\_014742072 [XP\_014742072] PREDICTED: transcriptional coactivator YAP1 isoform X2 [Sturnus vulgaris]. 86..100

MDPGQPQTQQPPQAAQPPASQQQQPPPPQPPGAVSGAPAGAAQPPGAGPPPAGHQIVHVRGDSETDLEAL  
FNAVMNPKGANVPHTLPMRLRKLKLPDSFFKPPPEPKAHSRQASTDAGTAGALTPQHVAHSSPASLQLGAVSPGTLT  
PSGVVTGPGAPSSQHLRQSSFEIPDDVPLPPGWEMAKTPSGQRYFLNHIDQTTTWQDPRKAMLSQMNVTAPTSPS  
VQQNIMNSASGPLPDGWEQAMTQDGEIYYINHKNKTTSWLDPRLDPRFAMNQRIQSAPVKQPPPLAPQSPQGGV  
MGGSSSNQQQQMRLQQLQMEKERLRLKHQELLRQALRNINPSTANSPKHQELALRSQLPTMEQDGGSQNPVSSPG  
MSQELRTMTTNSDPPFLNSGTYHSRDESTDSGLSMSSYSVPRTPDFFLNSVDEMDTGDSIGQSNIPSHQNRFPDY  
LEAIPGTNVDLGTLEGDGMNIEGEELMPSLQEQALSSDILNDMESVLAATKLDKESFLTWL  
PMRLRKLKLPDSFFKPP

rs:XP\_014742073 [XP\_014742073] PREDICTED: transcriptional coactivator YAP1 isoform X3 [Sturnus vulgaris]. 86..100

MDPGQPQTQQPPQAAQPPASQQQQPPPPQPPGAVSGAPAGAAQPPGAGPPPAGHQIVHVRGDSETDLEAL  
FNAVMNPKGANVPHTLPMRLRKLKLPDSFFKPPPEPKAHSRQASTDAGTAGALTPQHVAHSSPASLQLGAVSPGTLT  
PSGVVTGPGAPSSQHLRQSSFEIPDDVPLPPGWEMAKTPSGQRYFLNHIDQTTTWQDPRKAMLSQMNVTAPTSPS  
VQQNIMNSASGPLPDGWEQAMTQDGEIYYINHKNKTTSWLDPRLDPRFAMNQRIQSAPVKQPPPLAPQSPQGGV  
MGGSSSNQQQQMRLQQLQMEKERLRLKHQELLRQELALRSQLPTMEQDGGSQNPVSSPGMSQELRTMTTNS  
SDPFLNSGTYHSRDESTDSGLSMSSYSVPRTPDFFLNSVDEMDTGDSIGQSNIPSHQNRFPDYLEAIPGTNVDLG  
TLEGDGMNIEGEELMPSLQEQALSSDILNDMESVLAATKLDKESFLTWL PMRLRKLKLPDSFFKPP

rs:XP\_014742074 [XP\_014742074] PREDICTED: transcriptional coactivator YAP1 isoform X4 [Sturnus vulgaris]. 86..100

MDPGQPQTQQPPQAAQPPASQQQQPPPPQPPGAVSGAPAGAAQPPGAGPPPAGHQIVHVRGDSETDLEAL  
FNAVMNPKGANVPHTLPMRLRKLKLPDSFFKPPPEPKAHSRQASTDAGTAGALTPQHVAHSSPASLQLGAVSPGTLT  
PSGVVTGPGAPSSQHLRQSSFEIPDDVPLPPGWEMAKTPSGQRYFLNHIDQTTTWQDPRKAMLSQMNVTAPTSPS  
VQQNIMNSASGPLPDGWEQAMTQDGEIYYINHKNKTTSWLDPRLDPRFAMNQRIQSAPVKQPPPLAPQSPQGGV  
MGGSSSNQQQQMRLQQLQMEKERLRLKHQELLRQELALRSQLPTMEQDGGSQNPVSSPGMSQELRTMTTNSDPP  
LNSGTYHSRDESTDSGLSMSSYSVPRTPDFFLNSVDEMDTGDSIGQSNIPSHQNRFPDYLEAIPGTNVDLGTLEG  
DGMNIEGEELMPSLQEQALSSDILNDMESVLAATKLDKESFLTWL PMRLRKLKLPDSFFKPP

rs:XP\_014746410 [XP\_014746410] PREDICTED: uncharacterized protein LOC106862112 [Sturnus vulgaris]. 169..183

MAAGVIQPLAELRLPSFPFHGLLLPTHPEPDFDLSEEEEEEEEEEEEEEDVEAVEESVKPELASVSSTA  
ETTLRLLKFSELISCDIQRYFGRRGREEIASSRPTPEDCGSPHSAEAVPEVVAPRDSLGAHRLGPLAELFEYGV  
HRCLPARVAGSRTQRLERKYGHITPMHRRKLPPSFWKEPGPGPASLLHTGTPDFSDLLANWTVPEPGPELPGTGRE  
LLGRPGLEAEPFAGL PMHRRKLPPSFWKEP

rs:XP\_022836114 [XP\_022836114] transcriptional coactivator yorkie-like  
[Spodoptera litura].>tr:A0A2H1V2D1\_SPOFR [A0A2H1V2D1] SubName:  
Full=SFRICE\_000106 {ECO:0000313|EMBL:SOQ34991.1}; 44..58  
MALNSDAEQKSNLVLVRVDQSDSVLQSLFDTVLKPDSCRPLQVPLRMRQLPKSFFNPPSTGSKSPSVSH  
SRENSADSAFGSSSATGASPVSHSRAHSSPASLQQTYAAGQQNQPPPLHHQHTKQRSYDVGTHIPDDLGLPLPPGW  
EQARTPEGQIYYLK PLRMRQLPKSFFNPP

rs:XP\_014791770 [XP\_014791770] PREDICTED: uncharacterized protein  
LOC106884746 [Calidris pugnax]. 187..201  
MHGRAAAPRVNPGVPLRDTMAAGIIRPLAELRLPSFPFHSLLLPTRPEPDFDLSEEEEEEEEEEEEE  
EEVAEESVRPELAIPSAEETTLRLLKFSELISCDIQRYFGRRGQEEATGSHGVPEDCGSPRRAEQQPEAVLRGG  
PGATHRLGPLAELFEYGVHRCLPPRAAGGKTQRLERKYGHITPMHRRKLPPSFWREPFGPGVGLLHTGTPDFSDL  
LANWTVPEPGPELPGTGRELPPEPGHPGLEAEPFAGL PMHRRKLPPSFWREP

rs:XP\_014812970 [XP\_014812970] PREDICTED: protein **FAM181A** [Calidris  
pugnax]. 127..141  
MASDSEVKTLLNFVNLASSDIKAALDKSAPCRRSVDHRKYLQKQLKRFSQKYSRIPRCHPGKAPESGWR  
RVVEDRGRVPQPELDPSPHGGAVTEKVLRTGEAEESLAREGLVQEONPEASRPDQVPMRKRQLPASFWEEPRA  
PSLPARAFPAIEGLPAPRDPPIYEGKKCKRSDTASPEPPEPAPHAGDKDPVGVLSGRVGAWTCCPFPCPGPG  
VYQAPGTLAPSPFGLGLWRKSAAALPAEVPHFCKEADGTGQKLYRPVVLKPIPTKPAVPPPIFNVFGYL  
PMRKRQLPASFWEEP

rs:XP\_014785644 [XP\_014785644] PREDICTED: transcriptional coactivator  
YAP1-like, partial [Octopus bimaculoides]. 42..56  
MSQORTEQKGNQVVHVRGDSDSLALFKAAMNPSEVPHQLPLRMRNLPASFFTPPDPTQQKQHSREGS  
TDSTGAGSGSVLNSPGLTIAHPRAHSSPASLAQTMSAAPPSSQHVRQHSYDLTDEQPLPPGWEMAKTNQGHRY  
LKSRETDTDRQNLRELQIPPKYEFKIAHSSSLHMQQQPVQGVVQNPQSQSLKLSPGPQQQSPGGPPQVNN  
TNSNNQVNQQRVMAPSIQQLQNLALALEKEQLKKRAEEITRQELLLRAQMHPSEIPIPQTSEMTSVADPFLGHTT  
NQADLHSRQESSDGLGGMGTNYLSKSSDFLSNVDEMDDTQDG PLRMRNLPASFFTPP

rs:XP\_001960695 [XP\_001960695] LOW QUALITY PROTEIN: uncharacterized  
protein Dana\_GF13481 [Drosophila ananassae].>tr:B3MDX2\_DROAN [B3MDX2]  
SubName: Full=Uncharacterized protein {ECO:0000313|EMBL:EDV37517.2};  
84..98  
MLDKIILCSNFLYTISAFYMLTTMSSSNTNSLIEKEIADEDMLPPIKSPNNLVVRVNQDTPDDNLRLLFD  
SVLNPFGDAKRPLQLPFRMRKLPNSFFTPPAPSHSRANSADSTYDAGSQSNISLNSISLANTAQPVDGQPAIST  
IPQIQPSPQQRNLAIHFRARSSPASLQQNYNVRQRS DPTNPTNQPTAGPTFPENSAAEFPSGGAGAGAGGAGA  
GAPASSIELDGMMSVQDMPMTTQTVHKKQRSYDVVSPIQQLLRGALPPGWEQAKTNDGQIYYLNHTTKTTQWED  
PRIQFRQQNLMAERIKQNDVLQTTKQTTTSAIANNLGPLPDGWEQAVTETGDIYFINHIDRTTSWNDPRMQSGL  
SVLDCPDNLVSSLQIEDNICSNMFNDAQTIVNPPSSHKPDDELEWYKIN PFRMRKLPNSFFTPP

rs:XP\_012008716 [XP\_012008716] PREDICTED: protein **FAM181B** [Ovis aries  
musimon].>rs:XP\_011957662 [XP\_011957662] protein **FAM181B** [Ovis aries].  
212..226  
MAVQAALLSTHPFVFPFGGGSPDGLGGAFGALDKGCCFEDEETGTPAGSLLAGAESGDAREATRDLISF  
IDSASSNIKALDKPGKSKRVNHRKYLQKQIKRCSGLMGAAPPSPGAADMPAKRPLAGAQTVPVPAHGKAA  
PRREASQAAAAASLQSRSLAALFDSLHRVPGGADPARAAEAPAAAGLVGGDTAGSAGGPVPGSRKVPPLRARNLP  
PSFFTEPSRAGGGGGCGPSGPGVSLGDLEKGEAAEFFELLGPDYAGATEAGALLAAEPLDVFPAAGAAVLRGPP  
ELEPGLFESQPAMVGSLLYPEPWSAPGGPGTKKPLPAPGGGLTLNEPLRSVYPAAADSPGGDDGPGLLASFAFP  
FSDCALPPAPPPPPQVSYDYSAGYSRTAFAGLWRPDGAWEGAPGEEGAPRD PLRARNLPSSFFTEP

rs:XP\_012014635 [XP\_012014635] PREDICTED: protein **FAM181A** isoform X2  
[Ovis aries musimon]. 240..254  
MWERGRLLGMLCIWRGAPDWPEGPPAPGTRRPPFSPLEGGTTASSRTTELGRTRPGPLRRGNLGR

AALAGSRAPAPLVGSVLFPGAASCLENPASSWKARGSGALVMASDSVDMKMLLNFNVLASSDIKAALDKSAPCRRS  
VDHRKYLQKQLKRFSQKYSRSLPRGLPGRGAEPHLKRGPEDRPGRPLHLESGHGSSPSGGGGYKEKALGNPDREES  
LSKERTLHGPDPGAARPGQVPMRKRQLPASFWEEP RPTHSYPVGLGGLGPREGPPYEGKKHCKGLEPLGPETAP  
VPTSPRAPAEKEPLKMPGVSLVGRVSAWSCCPFYHQPIYPSPPGALPQSPMPSLGLWRKSAASPGELAHFCKD  
AEGPGQKVYRPPVVLKPIPTKPAVPPPIFNVFGYL PMRKRQLPASFWEEP

rs:XP\_012014637 [XP\_012014637] PREDICTED: protein **FAM181A** isoform X1  
[Ovis aries musimon]. 130..144

MASDSVDMKMLLNFNVLASSDIKAALDKSAPCRRSVDHRKYLQKQLKRFSQKYSRSLPRGLPGRGAEPHLK  
RGPEDRPGRPLHLESGHGSSPSGGGGYKEKALGNPDREESLSKERTLHGPDPGAARPGQVPMRKRQLPASFWEEP  
RPTHSYPVGLGGLGPREGPPYEGKKHCKGLEPLGPETAPVPTSPRAPAEKEPLKMPGVSLVGRVSAWSCCPFY  
HQPIYPSPPGALPQSPMPSLGLWRKSAASPGELAHFCKDAEGPGQKVYRPPVVLKPIPTKPAVPPPIFNVFGYL  
PMRKRQLPASFWEEP

rs:XP\_014999895 [XP\_014999895] PREDICTED: protein **FAM181A** [Macaca  
mulatta].>rs:XP\_014999896 [XP\_014999896] PREDICTED: protein **FAM181A** [Macaca  
mulatta].>tr:A0A1D5R8Q2\_MACMU [A0A1D5R8Q2] SubName: Full=Family with  
sequence similarity 181 member A {ECO:0000313|Ensembl:ENSMMUP00000056692};  
129..143

MASDSVDMKMLLNFNVLASSDIKAALDKSAPCRRSVDHRKYLQKQLKRFSQKYSRSLPRGLPGRAAEPYLK  
RGSEDRPGRLLLLDLGPDSSPGGGGGCKEALRNYPREECLAKEQLPQGQHPEAAQPGQVPMRKRQLPASFWEEP  
RPTHSYHVGLGGLGPREGPPYEGKKHCKGLEPLGPEIVPVPMSPRALAEKEPLKMPGVSLVGRVNAWSCCPFYH  
GQPIYPGPLGALPQSPVPSLGLWKKSPAFFGELAHLCCKDADSLGQKVCPRPVVLKPIPTKPAVPPPIFNVFGYL  
PMRKRQLPASFWEEP

rs:XP\_014971028 [XP\_014971028] PREDICTED: transcriptional coactivator  
YAP1 isoform X1 [Macaca mulatta]. 85..99

MDPGQQPPPPQAPQGGQPPAQQPPQGGPPSGPGQPAPAATQAAPQAPPAGHQIVHVRGDSETDLEALF  
NAVMNPKTANVPQTVPMRLRKLKLPDSFFKPPEPKSHSRQASTDAGTAGALTPQHVRHSSPASLQLGAVSPGTLTP  
TGVSVPAAATPTAQHLRQSSFEIPDDVPLPAGWEMAKTSSGQRYFLNHIDQTTTWQDPRKAMLSQMNVTAPTSPP  
VQQNMMNSASGPLPDGWEQAMTQDGEIYYINHKNTTSLWLDPRLDPRFGKAMNQRISQSAPVKQPPPLAQSPQG  
GVMGGSSSNQQQQMRLQQLQMEKERLRLKQOELLRQVRPQAMRNINPSTANSPKCQELALRSQLEQDGGTQ  
PVSSPGMSQELRMTTNSSDPFLNSGTYHSRDESTDSGLSMSSYSVPRTPDDFLNSVDEMDTGDITNQSTLPSQQ  
NRFPDYLEAIPGTNVDLGTLEGDGMNIEGEELMPSLQEQALSSDILNDMESVLAATKLDKESFLTWL  
PMRLRKLKLPDSFFKPP

rs:XP\_014971029 [XP\_014971029] PREDICTED: transcriptional coactivator  
YAP1 isoform X2 [Macaca mulatta]. 85..99

MDPGQQPPPPQAPQGGQPPAQQPPQGGPPSGPGQPAPAATQAAPQAPPAGHQIVHVRGDSETDLEALF  
NAVMNPKTANVPQTVPMRLRKLKLPDSFFKPPEPKSHSRQASTDAGTAGALTPQHVRHSSPASLQLGAVSPGTLTP  
TGVSVPAAATPTAQHLRQSSFEIPDDVPLPAGWEMAKTSSGQRYFLNHIDQTTTWQDPRKAMLSQMNVTAPTSPP  
VQQNMMNSASGPLPDGWEQAMTQDGEIYYINHKNTTSLWLDPRLDPRFAMNQRISQSAPVKQPPPLAQSPQGGV  
MGGSSSNQQQQMRLQQLQMEKERLRLKQOELLRQVRPQAMRNINPSTANSPKCQELALRSQLEQDGGTQNPV  
SSPGMSQELRMTTNSSDPFLNSGTYHSRDESTDSGLSMSSYSVPRTPDDFLNSVDEMDTGDITNQSTLPSQQNR  
FPDYLEAIPGTNVDLGTLEGDGMNIEGEELMPSLQEQALSSDILNDMESVLAATKLDKESFLTWL  
PMRLRKLKLPDSFFKPP

rs:XP\_014971030 [XP\_014971030] PREDICTED: transcriptional coactivator  
YAP1 isoform X3 [Macaca mulatta]. 85..99

MDPGQQPPPPQAPQGGQPPAQQPPQGGPPSGPGQPAPAATQAAPQAPPAGHQIVHVRGDSETDLEALF  
NAVMNPKTANVPQTVPMRLRKLKLPDSFFKPPEPKSHSRQASTDAGTAGALTPQHVRHSSPASLQLGAVSPGTLTP  
TGVSVPAAATPTAQHLRQSSFEIPDDVPLPAGWEMAKTSSGQRYFLNHIDQTTTWQDPRKAMLSQMNVTAPTSPP  
VQQNMMNSASGPLPDGWEQAMTQDGEIYYINHKNTTSLWLDPRLDPRFGKAMNQRISQSAPVKQPPPLAQSPQG  
GVMGGSSSNQQQQMRLQQLQMEKERLRLKQOELLRQAMRNINPSTANSPKCQELALRSQLEQDGGTQNPVSS  
PGMSQELRMTTNSSDPFLNSGTYHSRDESTDSGLSMSSYSVPRTPDDFLNSVDEMDTGDITNQSTLPSQQNRFP  
DYLEAIPGTNVDLGTLEGDGMNIEGEELMPSLQEQALSSDILNDMESVLAATKLDKESFLTWL  
PMRLRKLKLPDSFFKPP

rs:XP\_002799819 [XP\_002799819] PREDICTED: transcriptional coactivator  
YAP1 isoform X4 [Macaca mulatta].>tr:F7FER5\_MACMU [F7FER5] SubName:  
Full=Yes associated protein 1 {ECO:0000313|Ensembl:ENSMMUP00000004529};  
SubName: Full=Yorkie homolog isoform 1 {ECO:0000313|EMBL:AFJ71249.1};  
85..99

MDPGQQPPPQPAPQGQGGQPPAQPPQGQGGPPSGPGQPAPAATQAAPQAPPAGHQIVHVRGDSETDLEALF  
NAVMPKPTANVPQTVPMRLRKLKLPDSFFKPPPEPKSHSRQASTDAGTAGALTPQHVRHSSPASLQLGAVSPGTLTP  
TGVVSGPAATPTAQHLRQSSFEIPDDVPLPAGWEMAKTSSGQRYFLNHIDQTTTWQDPRKAMLSQMNVTAPTSPP  
VQQNMMNSASGPLPDGWEQAMTQDGEIYYINHKNKTTSWLDPRLDPRFAMNQRISQSAPVKQPPPLAPQSPQGGV  
MGGSSSNQQQQMRLQQLQMEKERLRLKQQELLRQAMRNINPSTANSPKCQELALRSQLPTLEQDGGTQNPVSSPG  
MSQELRTMTTNSSDPFLNSGTYHSRDESTDSGLSMSSYSVPRTPDDFLNSVDEMMDTGDITNQSTLPSQQNRFPDY  
LEAIPGTNVDLGTLEGDGMNIEGEEELMPSLQEQALSSDILNDMESVLAATKLDKESFLTWL  
PMRLRKLKLPDSFFKPP

rs:XP\_014971031 [XP\_014971031] PREDICTED: transcriptional coactivator  
YAP1 isoform X5 [Macaca mulatta]. 85..99

MDPGQQPPPQPAPQGQGGQPPAQPPQGQGGPPSGPGQPAPAATQAAPQAPPAGHQIVHVRGDSETDLEALF  
NAVMPKPTANVPQTVPMRLRKLKLPDSFFKPPPEPKSHSRQASTDAGTAGALTPQHVRHSSPASLQLGAVSPGTLTP  
TGVVSGPAATPTAQHLRQSSFEIPDDVPLPAGWEMAKTSSGQRYFLNHIDQTTTWQDPRKAMLSQMNVTAPTSPP  
VQQNMMNSASGPLPDGWEQAMTQDGEIYYINHKNKTTSWLDPRLDPRFGKAMNQRISQSAPVKQPPPLAPQSPQG  
GVMGGSSSNQQQQMRLQQLQMEKERLRLKQQELLRQVRPQELALRSQLPTLEQDGGTQNPVSSPGMSQELRTMTT  
NSSDPFLNSGTYHSRDESTDSGLSMSSYSVPRTPDDFLNSVDEMMDTGDITNQSTLPSQQNRFPDYLEAIPGTNVD  
LGTLEGDGMNIEGEEELMPSLQEQALSSDILNDMESVLAATKLDKESFLTWL PMRLRKLKLPDSFFKPP

rs:XP\_014971032 [XP\_014971032] PREDICTED: transcriptional coactivator  
YAP1 isoform X6 [Macaca mulatta]. 85..99

MDPGQQPPPQPAPQGQGGQPPAQPPQGQGGPPSGPGQPAPAATQAAPQAPPAGHQIVHVRGDSETDLEALF  
NAVMPKPTANVPQTVPMRLRKLKLPDSFFKPPPEPKSHSRQASTDAGTAGALTPQHVRHSSPASLQLGAVSPGTLTP  
TGVVSGPAATPTAQHLRQSSFEIPDDVPLPAGWEMAKTSSGQRYFLNHIDQTTTWQDPRKAMLSQMNVTAPTSPP  
VQQNMMNSASGPLPDGWEQAMTQDGEIYYINHKNKTTSWLDPRLDPRFAMNQRISQSAPVKQPPPLAPQSPQGGV  
MGGSSSNQQQQMRLQQLQMEKERLRLKQQELLRQVRPQELALRSQLPTLEQDGGTQNPVSSPGMSQELRTMTTNS  
SDPFLNSGTYHSRDESTDSGLSMSSYSVPRTPDDFLNSVDEMMDTGDITNQSTLPSQQNRFPDYLEAIPGTNVDL  
GTLEGDGMNIEGEEELMPSLQEQALSSDILNDMESVLAATKLDKESFLTWL PMRLRKLKLPDSFFKPP

rs:XP\_014971034 [XP\_014971034] PREDICTED: transcriptional coactivator  
YAP1 isoform X7 [Macaca mulatta].>tr:F7FEK3\_MACMU [F7FEK3] SubName:  
Full=Yes associated protein 1 {ECO:0000313|Ensembl:ENSMMUP00000004530};  
85..99

MDPGQQPPPQPAPQGQGGQPPAQPPQGQGGPPSGPGQPAPAATQAAPQAPPAGHQIVHVRGDSETDLEALF  
NAVMPKPTANVPQTVPMRLRKLKLPDSFFKPPPEPKSHSRQASTDAGTAGALTPQHVRHSSPASLQLGAVSPGTLTP  
TGVVSGPAATPTAQHLRQSSFEIPDDVPLPAGWEMAKTSSGQRYFLNHIDQTTTWQDPRKAMLSQMNVTAPTSPP  
VQQNMMNSASGPLPDGWEQAMTQDGEIYYINHKNKTTSWLDPRLDPRFGKAMNQRISQSAPVKQPPPLAPQSPQG  
GVMGGSSSNQQQQMRLQQLQMEKERLRLKQQELLRQELALRSQLPTLEQDGGTQNPVSSPGMSQELRTMTTNSSD  
PFLNSGTYHSRDESTDSGLSMSSYSVPRTPDDFLNSVDEMMDTGDITNQSTLPSQQNRFPDYLEAIPGTNVDL  
GTLEGDGMNIEGEEELMPSLQEQALSSDILNDMESVLAATKLDKESFLTWL PMRLRKLKLPDSFFKPP

rs:XP\_002799820 [XP\_002799820] PREDICTED: transcriptional coactivator  
YAP1 isoform X8 [Macaca mulatta].>tr:I2CWB5\_MACMU [I2CWB5] SubName:  
Full=Yorkie homolog isoform 3 {ECO:0000313|EMBL:AFJ71250.1}; 85..99

MDPGQQPPPQPAPQGQGGQPPAQPPQGQGGPPSGPGQPAPAATQAAPQAPPAGHQIVHVRGDSETDLEALF  
NAVMPKPTANVPQTVPMRLRKLKLPDSFFKPPPEPKSHSRQASTDAGTAGALTPQHVRHSSPASLQLGAVSPGTLTP  
TGVVSGPAATPTAQHLRQSSFEIPDDVPLPAGWEMAKTSSGQRYFLNHIDQTTTWQDPRKAMLSQMNVTAPTSPP  
VQQNMMNSASGPLPDGWEQAMTQDGEIYYINHKNKTTSWLDPRLDPRFAMNQRISQSAPVKQPPPLAPQSPQGGV  
MGGSSSNQQQQMRLQQLQMEKERLRLKQQELLRQELALRSQLPTLEQDGGTQNPVSSPGMSQELRTMTTNSSDP  
FLNSGTYHSRDESTDSGLSMSSYSVPRTPDDFLNSVDEMMDTGDITNQSTLPSQQNRFPDYLEAIPGTNVDL  
GTLEGDGMNIEGEEELMPSLQEQALSSDILNDMESVLAATKLDKESFLTWL PMRLRKLKLPDSFFKPP

rs:XP\_014971035 [XP\_014971035] PREDICTED: transcriptional coactivator  
YAP1 isoform X9 [Macaca mulatta].>tr:A0A1D5QLM0\_MACMU [A0A1D5QLM0] SubName:

Full=Yes associated protein 1 {ECO:0000313|Ensembl:ENSMMUP00000048945};  
85..99

MDPGQQPPPPQAPQGGQPPAQQPPQGGQPPSGPGQPAPAATQAAPQAPPAGHQIVHVRGDSETDLEALF  
NAVMNPKTANVPQTVPMRLRKLKLPDSFFKPPPEPKSHSRQASTDAGTAGALTPQHVRHSSPASLQLGAVSPGTLTP  
TGVVSGPAATPTAQHLRQSSFEIPDDVPLPAGWEMAKTSSGQRYFLNHIDQTTTWQDPRKAMLSQMNVTAPTSPP  
VQQNMMNSASAMNQRIQSAPVKQPPPLAPQSPQGGVMGGSSSNQQQQMRLQQLQMEKERLRLKQQEELLRQVRPQ  
AMRNINPSTANSKQELALRSQLEPTLEQDGGTQNPVSSPGMSQELRTMTTNSSDPFLNSGTYHSRDESTDSGLS  
MSSYSVPRTPDDFLNSVDEMMDTGDITINQSTLPSQQNRFPDYLEAIPGTNVDLGTLEGDGMNIEGEEELMPSLQEQAL  
SSDILNDMESVLAATKLDKESFLTWL PMRLRKLKLPDSFFKPP

rs:XP\_014971036 [XP\_014971036] PREDICTED: transcriptional coactivator  
YAP1 isoform X10 [Macaca mulatta]. 85..99

MDPGQQPPPPQAPQGGQPPAQQPPQGGQPPSGPGQPAPAATQAAPQAPPAGHQIVHVRGDSETDLEALF  
NAVMNPKTANVPQTVPMRLRKLKLPDSFFKPPPEPKSHSRQASTDAGTAGALTPQHVRHSSPASLQLGAVSPGTLTP  
TGVVSGPAATPTAQHLRQSSFEIPDDVPLPAGWEMAKTSSGQRYFLNHIDQTTTWQDPRKAMLSQMNVTAPTSPP  
VQQNMMNSASAMNQRIQSAPVKQPPPLAPQSPQGGVMGGSSSNQQQQMRLQQLQMEKERLRLKQQEELLRQAMRN  
INPSTANSKQELALRSQLEPTLEQDGGTQNPVSSPGMSQELRTMTTNSSDPFLNSGTYHSRDESTDSGLSMSSY  
SVPRTPDFFLNSVDEMMDTGDITINQSTLPSQQNRFPDYLEAIPGTNVDLGTLEGDGMNIEGEEELMPSLQEQALSSDI  
LNDMESVLAATKLDKESFLTWL PMRLRKLKLPDSFFKPP

rs:XP\_002799821 [XP\_002799821] PREDICTED: transcriptional coactivator  
YAP1 isoform X11 [Macaca mulatta]. 85..99

MDPGQQPPPPQAPQGGQPPAQQPPQGGQPPSGPGQPAPAATQAAPQAPPAGHQIVHVRGDSETDLEALF  
NAVMNPKTANVPQTVPMRLRKLKLPDSFFKPPPEPKSHSRQASTDAGTAGALTPQHVRHSSPASLQLGAVSPGTLTP  
TGVVSGPAATPTAQHLRQSSFEIPDDVPLPAGWEMAKTSSGQRYFLNHIDQTTTWQDPRKAMLSQMNVTAPTSPP  
VQQNMMNSASAMNQRIQSAPVKQPPPLAPQSPQGGVMGGSSSNQQQQMRLQQLQMEKERLRLKQQEELLRQVRPQ  
ELALRSQLEPTLEQDGGTQNPVSSPGMSQELRTMTTNSSDPFLNSGTYHSRDESTDSGLSMSSYSVPRTPDDFLNS  
VDEMMDTGDITINQSTLPSQQNRFPDYLEAIPGTNVDLGTLEGDGMNIEGEEELMPSLQEQALSSDILNDMESVLAATK  
LDKESFLTWL PMRLRKLKLPDSFFKPP

rs:XP\_014971037 [XP\_014971037] PREDICTED: transcriptional coactivator  
YAP1 isoform X12 [Macaca mulatta]. 85..99

MDPGQQPPPPQAPQGGQPPAQQPPQGGQPPSGPGQPAPAATQAAPQAPPAGHQIVHVRGDSETDLEALF  
NAVMNPKTANVPQTVPMRLRKLKLPDSFFKPPPEPKSHSRQASTDAGTAGALTPQHVRHSSPASLQLGAVSPGTLTP  
TGVVSGPAATPTAQHLRQSSFEIPDDVPLPAGWEMAKTSSGQRYFLNHIDQTTTWQDPRKAMLSQMNVTAPTSPP  
VQQNMMNSASAMNQRIQSAPVKQPPPLAPQSPQGGVMGGSSSNQQQQMRLQQLQMEKERLRLKQQEELLRQELAL  
RSQLEPTLEQDGGTQNPVSSPGMSQELRTMTTNSSDPFLNSGTYHSRDESTDSGLSMSSYSVPRTPDDFLNSVDEM  
DTGDITINQSTLPSQQNRFPDYLEAIPGTNVDLGTLEGDGMNIEGEEELMPSLQEQALSSDILNDMESVLAATKLDKE  
SFLTWL PMRLRKLKLPDSFFKPP

rs:XP\_001360893 [XP\_001360893] uncharacterized protein Dpse\_GA17846,  
isoform A [Drosophila pseudoobscura pseudoobscura].>tr:Q28ZZ4\_DROPS  
[Q28ZZ4] SubName: Full=Uncharacterized protein, isoform A  
{ECO:0000313|EMBL:EAL25468.3}; 65..79

MLTTMSTSNSTNSIIEKEIDDEDMLSPIKSSNNLVVRVNQDQDNDNLQALFDSVLNPGDAKRPLQLPFRMR  
KLPNSFFTPPAPSHSRANSADSTYDAGSQSNINKTAQPVVQPPAISQIQPSQQSRLAIHHFRARSSPASLQQNY  
NVRSRSDANPGPSGQPTYPENSAEFPNSAANNIELDGMNTCMGGQDMPMSTQTVHKKQRSYDVVSPIQQLQSQGL  
ALPPGWEQAKTNDGQIYYLNHTTKSTQWEDPRIQYRQQQRLMAERIKQSESGLTGLDCPDNLVSSLQIEDNICT  
NLFNDAQTIVNPPSSHKPDDLEWYKIN PFRMRKLPNSFFTPP

rs:XP\_015039803 [XP\_015039803] uncharacterized protein Dpse\_GA17846,  
isoform B [Drosophila pseudoobscura pseudoobscura].>tr:A0A0R3NMI2\_DROPS  
[A0A0R3NMI2] SubName: Full=Uncharacterized protein, isoform B  
{ECO:0000313|EMBL:KRT02241.1}; 65..79

MLTTMSTSNSTNSIIEKEIDDEDMLSPIKSSNNLVVRVNQDQDNDNLQALFDSVLNPGDAKRPLQLPFRMR  
KLPNSFFTPPAPSHSRANSADSTYDAGSQSNINKTAQPVVQPPAISQIQPSQQSRLAIHHFRARSSPASLQQNY  
NVRSRSDANPGPSGQPTYPENSAEFPNSAANNIELDGMNTCMGGQDMPMSTQTVHKKQRSYDVVSPIQQLQSQGL  
ALPPGWEQAKTNDGQIYYLNHTTKSTQWEDPRIQYRQQQRLMAERIKQSESGLTGLDCPDNLVSSLQVQCN  
PFRMRKLPNSFFTPP

rs:XP\_015039804 [XP\_015039804] uncharacterized protein Dpse\_GA17846, isoform C [Drosophila pseudoobscura pseudoobscura].>tr:A0A0R3NMX5\_DROPS [A0A0R3NMX5] SubName: Full=Uncharacterized protein, isoform C {ECO:0000313|EMBL:KRT02242.1}; 65..79

MLTTMSTSNSTNSIIEKEIDDEDMLSPIKSSNNLVVRVNQDTDDNLQALFDSVLNPGDAKRPLQLPFRMR  
KLPNSFFTPPPAPSHSRANSADSTYDAGSQSNINKTAQPVVDVQQPAISQIQPSQQSRLAIHHFRARSSPASLQQNY  
NVRSRSDANPGPSGQGPITYPENSAPNSAANNIELDGMNTCMGGQDMPMSTQTVHKKQRSYDVVSPILQSQLG  
ALPPGWEQAKTNDGQIYYLNHTTKSTQWEDPRIQYRQQOQLMAERIKQSDVLTQTTKQTTTSTIANSLGFLPDGW  
EQAVTDSGDIYFINHIDRTTSWIDPRMQSGLTGLDCPDNLVSSLQIEDNICTNLFNDAQTIVNPPSSHKPDDLEW  
YKIN PFRMRKLPNSFFTPP

rs:XP\_015051649 [XP\_015051649] uncharacterized protein Dyak\_GE11487, isoform B [Drosophila yakuba].>tr:A0A0R1DXTX3\_DROYA [A0A0R1DXTX3] SubName: Full=Uncharacterized protein, isoform B {ECO:0000313|EMBL:KTK00541.1}; 88..102

MCACLIAKIILCSFRLYTISAFYMLTTMSASSNTNSLIEKEIEDEDMLSLMKSSNNLVVRVNQDTDDNLQ  
ALFDSVLNPGDAKRPLQLPLMRKLPNSFFTPPPAPSHSRANSADSTYDAGSQSSINIGNKASIVQQPDGQSPNAA  
IPQLQIQSPQHSRLAIHHSRARSPPASLQQNYNVRARSDAAAANNPNANPSSQQQPAGPTTFPNSAQEFPSGAP  
ASSAIDLAMNTCMSQDIPMSMQTVHKKQRSYDVISPIQLNRQLGALPPGWEQAKTNDGQIYYLNHTTKSTQWED  
PRIQYRQQOQLMAERIKQNESGLSVLDCPDNLVSSLQIEDNLCNLFNDAQAIVNPPSSHKPDDLEWYKIN  
PLMRKLPNSFFTPP

rs:XP\_002092762 [XP\_002092762] uncharacterized protein Dyak\_GE11487, isoform A [Drosophila yakuba].>tr:B4PAT4\_DROYA [B4PAT4] SubName: Full=Uncharacterized protein, isoform A {ECO:0000313|EMBL:EDW92474.1}; 88..102

MCACLIAKIILCSFRLYTISAFYMLTTMSASSNTNSLIEKEIEDEDMLSLMKSSNNLVVRVNQDTDDNLQ  
ALFDSVLNPGDAKRPLQLPLMRKLPNSFFTPPPAPSHSRANSADSTYDAGSQSSINIGNKASIVQQPDGQSPNAA  
IPQLQIQSPQHSRLAIHHSRARSPPASLQQNYNVRARSDAAAANNPNANPSSQQQPAGPTTFPNSAQEFPSGAP  
ASSAIDLAMNTCMSQDIPMSMQTVHKKQRSYDVISPIQLNRQLGALPPGWEQAKTNDGQIYYLNHTTKSTQWED  
PRIQYRQQOQLMAERIKQNDVLTQTTKQTTTSTIANNLGFLPDGWEQAVTESGDLYFINHIDRTTSWIDPRMQS  
LSVLDCPDNLVSSLQIEDNLCNLFNDAQAIVNPPSSHKPDDLEWYKIN PLMRKLPNSFFTPP

rs:XP\_015124110 [XP\_015124110] PREDICTED: transcriptional coactivator YAP1-A isoform X1 [Diachasma alloeum]. 46..60

MALNPDVDQLSKGNLVVRIDQNSESDLQALFDSVLKPDSCRPLQVPLMRNLPDSFFNPPSTGSKSPS  
SHSRENSADSAFGTIIISNSGPGNTTPSGNSNGNSTANQTSVPAGLTVAHPRAHSSPASLQQTYAAAQQATQHAPQ  
PHARHVHHQKQRSYDVISTVDDLGLPLPHGWEQARTPEGQVYFLNHLTRTTTWEDPRKTAATAANVTIATAAENGKS  
PAGAGANALGPLPEGWEQARTPEGEIYFINHQTRTTSWFDPRIPHTLQRAPTSGAMLPTNWIQPPGATGLQSNQT  
IQVCQQLRLQLSLOMERERLQKQAEIMRQOELMLRQSNQDASMDPFLSGMSEQHARQESADSGGLGGSAYS  
LPH TPEDFLSNIDDNDATSDGGAPMETPDIISTLSDNIDSTDDLVPPTLQFSEELSSDILDDVQSLINPSS  
TKPENVLT WL PLMRNLPDSFFNPP

rs:XP\_015124111 [XP\_015124111] PREDICTED: transcriptional coactivator YAP1 isoform X2 [Diachasma alloeum].>rs:XP\_015124112 [XP\_015124112] PREDICTED: transcriptional coactivator YAP1 isoform X3 [Diachasma alloeum]. 46..60

MALNPDVDQLSKGNLVVRIDQNSESDLQALFDSVLKPDSCRPLQVPLMRNLPDSFFNPPSTGSKSPS  
SHSRENSADSAFGTIIISNSGPGNTTPSGNSNGNSTANQTSVPAGLTVAHPRAHSSPASLQQTYAAAQQATQHAPQ  
PHARHVHHQKQRSYDVISTVDDLGLPLPHGWEQARTPEGQVYFLNHLTRTTTWEDPRKTAATAANVTIATAAENGKS  
PAGAGANALGPLPEGWEQARTPEGEIYFINHQTRTTSWFDPRIPHTLQRAPTSGAMLPTNWIQPPGATGLQSNQT  
IQVCQQLRLQLSLOMERERLQKQAEIMRQOELMLRQSNQDASMDPFLSGMSEQHARQESADSGGLGGSAYS  
LPH TPEDFLSNIDDNDATSDGGAPMETPDIISTLSDNIDSTDDLVPPTLQ PLMRNLPDSFFNPP

rs:XP\_015124113 [XP\_015124113] PREDICTED: transcriptional coactivator YAP1 isoform X4 [Diachasma alloeum]. 46..60

MALNPDVDQLSKGNLVVRIDQNSESDLQALFDSVLKPDSCRPLQVPLMRNLPDSFFNPPSTGSKSPS  
SHSRENSADSAFGTIIISNSGPGNTTPSGNSNGNSTANQTSVPAGLTVAHPRAHSSPASLQQTYAAAQQATQHAPQ  
PHARHVHHQKQRSYDVISTVDDLGLPLPHGWEQARTPEGQVYFLNHLTRTTTWEDPRKTAATAANVTIATAAENGKS

PAGAGANALGPLPEGWEQARTPEGEIYFINHQTRTTSWFDPRIPHTLQRAPTSGLMPTNWIQPPGATGLQSNQT  
IQVCQQLRLQSLQMERERLQKQAEIMRQQLMLRQSNQDASMDPFLSGMSEQHARQESADSGLGLGSAYSLPH  
TPEDFLSNIDNMDATSV PLRMRNLPDSFFNPP

rs:XP\_015188814 [XP\_015188814] PREDICTED: transcriptional coactivator  
YAP1 isoform X1 [Polistes dominula]. 47..61

MALNQEIDQLSNNSNLVVRIDQNSESDLQALFDTVLKPD SKHPLQVPLRMRNLPDSFFNPPSTGSRSPS  
ISHSRENSADSAFGAGGSGGASGAVTGTGGRNAESSGGGGGNV VAGGANVSVVGGGAGGGAGAGASVGVAN  
GNGGGPAGGSGPGGGAGGVVAVAAAAV SANVNGGNTGGAGGTANGGPPNGGGAGGVSAGSAASANAVNGPAPAAA  
AAAAAAAAAAAAAAAAAGLTVAH PRAHSSPASLQOQTYTSAQQAQQHAPQPHARHHHHKQORSYDVISTVDDLGPLPHG  
WEQARTTEGQIYFLNHLTRTTTTWEDPRKTVAAQNVAQVAAQVESGKSAAAAGNTLGPLPDGWEQARTPEGEIYFIN  
HQTRTTSWFDPRIPHTLQRAPSSGAMLPQNWLQOQPTAAGIPNNQSLQACQQLRLQSLQMERERLQKQOQEIIRQ  
QELMLRQTTTTDAAMPFLSGISEQHARQESADSGLGLGSAYSLPHTPEDFLANIDNMDGTSGKLLVHYENRWKV  
DFAVFDAYFVDGGAPMETPDLSTLSDNIDSTDDLVP SLQLSEDFSSDILEDVQCFISPNTIKPGNVLTWL  
PLRMRNLPDSFFNPP

rs:XP\_015188817 [XP\_015188817] PREDICTED: transcriptional coactivator  
YAP1 isoform X2 [Polistes dominula]. 47..61

MALNQEIDQLSNNSNLVVRIDQNSESDLQALFDTVLKPD SKHPLQVPLRMRNLPDSFFNPPSTGSRSPS  
ISHSRENSADSAFGAGGSGGASGAVTGTGGRNAESSGGGGGNV VAGGANVSVVGGGAGGGAGAGASVGVAN  
GNGGGPAGGSGPGGGAGGVVAVAAAAV SANVNGGNTGGAGGTANGGPPNGGGAGGVSAGSAASANAVNGPAPAAA  
AAAAAAAAAAAAAAAAAGLTVAH PRAHSSPASLQOQTYTSAQQAQQHAPQPHARHHHHKQORSYDVISTVDDLGPLPHG  
WEQARTTEGQIYFLNHLTRTTTTWEDPRKTVAAQNVAQVAAQVESGKSAAAAGNTLGPLPDGWEQARTPEGEIYFIN  
HQTRTTSWFDPRIPHTLQRAPSSGAMLPQNWLQOQPTAAGIPNNQSLQACQQLRLQSLQMERERLQKQOQEIIRQ  
QELMLRQTTTTDAAMPFLSGISEQHARQESADSGLGLGSAYSLPHTPEDFLANIDNMDGTSDGGAPMETPDLST  
LSDNIDSTDDLVP SLQLSEDFSSDILEDVQCFISPNTIKPGNVLTWL PLRMRNLPDSFFNPP

rs:XP\_015196863 [XP\_015196863] PREDICTED: transcriptional coactivator  
YAP1 isoform X1 [Lepisosteus oculatus].>rs:XP\_006627849 [XP\_006627849]  
PREDICTED: transcriptional coactivator YAP1 isoform X1 [Lepisosteus  
oculatus].>tr:W5MEM7\_LEPOC [W5MEM7] SubName: Full=Yes-associated protein 1  
{ECO:0000313|Ensembl:ENSLOCP00000006836}; 45..59

MDPSQHNPAGQPIVHVRGDSETDLEALFNAV MNPKSANVPPSVPMRLRKL PDSFFKQPEPKSHSRQAS  
TDAGTAGTLAPQH VRAHSSPASLLNAVSPGSLAGVIPP GAPPQHLRQASYEIPDDVPLPPGWEMAKTPSGQRYFL  
NHMDQTTTTWQDPRKAMLSQMNAAPAS PMPVQQNIMNSTSGPLPEGWEQAITS DGEIYYINHKNKTT SWLDPRLD  
PRYALNQQRITQSAPVKQASPLPSQSPQGGV LGGNNQMRLQQLQMEKERLRLKHQELLRQVRPQELALRNQLPTS  
MEQDGGTQNAVSSPGMAQDVRTMTTNS SDPFLNSGTYHSRDESTDSGLSMSSYSVPRT PDDFLNSVDEMDTGDSL  
GPSSMATQPSRFPDYLDTI PGTNVDLGTLEGDSMAVEGEELMPSLQEALSSDILNDMESVLAATKIDKESFLT WL  
PMRLRKL PDSFFKQP

rs:XP\_015196864 [XP\_015196864] PREDICTED: transcriptional coactivator  
YAP1 isoform X2 [Lepisosteus oculatus]. 45..59

MDPSQHNPAGQPIVHVRGDSETDLEALFNAV MNPKSANVPPSVPMRLRKL PDSFFKQPEPKSHSRQAS  
TDAGTAGTLAPQH VRAHSSPASLLNAVSPGSLAGVIPP GAPPQHLRQASYEIPDDVPLPPGWEMAKTPSGQRYFL  
NHMDQTTTTWQDPRKAMLSQMNAAPAS PMPVQQNIMNSTSGPLPEGWEQAITS DGEIYYINHKNKTT SWLDPRLD  
PRYALNQQRITQSAPVKQASPLPSQSPQGGV LGGNNQMRLQQLQMEKERLRLKHQELLRQELALRNQLPTSMEQD  
GGTQNAVSSPGMAQDVRTMTTNS SDPFLNSGTYHSRDESTDSGLSMSSYSVPRT PDDFLNSVDEMDTGDSLGPSS  
MATQPSRFPDYLDTI PGTNVDLGTLEGDSMAVEGEELMPSLQEALSSDILNDMESVLAATKIDKESFLT WL  
PMRLRKL PDSFFKQP

rs:XP\_006627850 [XP\_006627850] PREDICTED: transcriptional coactivator  
YAP1 isoform X3 [Lepisosteus oculatus]. 45..59

MDPSQHNPAGQPIVHVRGDSETDLEALFNAV MNPKSANVPPSVPMRLRKL PDSFFKQPEPKSHSRQAS  
TDAGTAGTLAPQH VRAHSSPASLLNAVSPGSLAGVIPP GAPPQHLRQASYEIPDDVPLPPGWEMAKTPSGQRYFL  
NHMDQTTTTWQDPRKAMLSQMNAAPAS PMPVQQNIMNSTSALNQQRITQSAPVKQASPLPSQSPQGGV LGGNNQM  
RLQQLQMEKERLRLKHQELLRQVRPQELALRNQLPTSMEQDGGTQNAVSSPGMAQDVRTMTTNS SDPFLNSGTYH  
SRDESTDSGLSMSSYSVPRT PDDFLNSVDEMDTGDSLGPSSMATQPSRFPDYLDTI PGTNVDLGTLEGDSMAVEG  
EELMPSLQEALSSDILNDMESVLAATKIDKESFLT WL PMRLRKL PDSFFKQP



rs:XP\_006627851 [XP\_006627851] PREDICTED: transcriptional coactivator YAP1 isoform X4 [Lepisosteus oculatus]. 45..59

MDPSQHNPAGQPIVHVRGDSETDLEALFNAVMPKNSANVPPSVPMLRKLKLPDSFFKQPEPKSHSRQAS  
TDAGTAGTLAPQHVRHSSPASLLNAVSPGSLAGVIPPAGAPPQHLRQASYEIPDDVPLPPGWEMAKTPSGQRYFL  
NHMDQTTTTWQDPRKAMLSQMNAAPASPMVQONIMNSTSALNQORITQSAPVKQASPLPSQSPQGGVVLGGNNQM  
RLQQLQMEKERLRLKHQELLRQELALRNQLPTSMEQDGGTQNAVSSPGMAQDVRTMTTNSDFFLNSGTYHSRDE  
STDSGLSMSSYSVPRTPDDFLNSVDEMDTGDSLGPSSMATQPSRFPDYLDLTIPTGNVDLGTLEGDSMAVEGEELM  
PSLQEALSSDILNDMESVLAATKIDKESFLTWL PMRLRKLKLPDSFFKQP

rs:XP\_015197075 [XP\_015197075] PREDICTED: protein **FAM181B** [Lepisosteus oculatus].>tr:W5NNT9\_LEPOC [W5NNT9] SubName: Full=Family with sequence similarity 181 member B {ECO:0000313|Ensembl:ENSLOCP00000022298}; 156..170

MAVQAAIMTPHFMHFCFPGSVMEYEMDKSFDGGVLGEMDCEGDFKETTDRDLSFIDSASSNIKLALDKP  
VKSRRKVNHRKYLQKQIKRCTGMITPGSGGQEAVKRQGSQSNPQSTFQCKPPPREGIQSNLQSKSLAALFDSV  
KDIRAEKGGKLLPLRHRNLPRSFFTEPANSSKVTSTSGMTLKDRLGRNPEAAEFFELLGPDYSNMIADHDAFQGV  
VRIQQEAALEPGSYDPQHLVGGFLYTEPWSTCSPSKKTGICSLNVNENMRTIPVQPPVYCHSDSAVTSFQEENA  
SGMPMFAHFFTDCLPQDYSSGYNRTNFFSL PLRHRNLPRSFFTEP

rs:XP\_015206503 [XP\_015206503] PREDICTED: protein **FAM181A** [Lepisosteus oculatus]. 127..141

MACTDSEVKTLNLFVNLAASSDIKAALDKSAPCRRSVDHRKYLQKQLKRFSQKYSRIPRCQSYRTSESGI  
GKALEDKSGTYPLETVNRNLSLAHLSEKIGSDLRCDTQKPNPNSAHEKNYSRQDQVPMRKRQLPASFWEEP  
KSKHETFAQVWRKNQAVGGSGLSGSVEQIRKKCSEGPKTTSVHINRQSVAEKEPLTVEMTSLTGSASLCGCCPFQ  
YHGQHVYQSHVVLVQSGFSDSSMWGKPSVAQTEGLDCKDVAINGQKSHTHVVVKPIPTKPTVPSPIFSVFGFI  
PMRKRQLPASFWEEP

rs:XP\_005562134 [XP\_005562134] PREDICTED: protein **FAM181A** [Macaca fascicularis].>rs:XP\_005562136 [XP\_005562136] PREDICTED: protein **FAM181A** [Macaca fascicularis]. 129..143

MASDSDVKMLNLFVNLAASSDIKAALDKSAPCRRSVDHRKYLQKQLKRFSQKYSRLRGLPGRAAEPYLK  
RGSEDRPGRLLLDLGPDSSPGGGGCKEKALRNYPYREECLAKEQLPQGQHPAAQPGQVPMRKRQLPASFWEEP  
PTHSYHVGLEGGLPREGPPYEGKKNCKGLEPLGPEIVPVPMSPRALAEKEPLKIPGVSLVGRVNAWSCCFFQYH  
GQPIYPGPLGALPQSPVPSLGLWKKSPAFFGELAHLCCKDADGLGQKVCRPVVLKPIPTKPAVPPPIFNVFGYL  
PMRKRQLPASFWEEP

rs:XP\_015358221 [XP\_015358221] PREDICTED: LOW QUALITY PROTEIN: protein **FAM181B** [Marmota marmota marmota]. 211..225

MFSWTHPSSDSFSDIFDNLSNIEATLVISSFNLTPIILSSSIVLCFAYFLTFLHYNFIDSASSNIKL  
ALDKPGKSKRKNHRKYLQKQIKRCNGLMGAAPPSPSAADTPAKRPLAAPSASTAAAPVHGKAAPRREASQA  
AAAASLQSRSLAALFDSLHRVSGGRRASGGAVAVPVTGLGGASSGGAGGEASGLAGGTAVPGARKVPLRARNLPP  
SFFTEPSRAGGGGGCGSPGVS LGDLEKGAEEVEFFELLGSDYGAGTEAGVLLAAEPLDVFTGAAVLRGPLE  
LEPGLFEPPPAMVGNLIYPEPWSAPSCAPTCKKSPVAAARGGLTLNESLRPLYPAPSDSPGGEDGTGHLASFAFF  
PDCTLPPPPPHQVSYDYSAGYSRAAYSSLWRPDGVWEGAPGEEGAHRD PLRARNLPPSFFTEP

rs:XP\_015372505 [XP\_015372505] PREDICTED: transcriptional coactivator YAP1-A [Diuraphis noxia]. 64..78

MSGLQQQEQQHQQVSIKMEPTGPSSPTPSVNSNLVVRVDQNSSETDLQALFDTVLKPDKKPLQLPLMRQ  
LPKSFNPPSTGSKSPSISHSRENSGDSAFGTANVGPSCSGPVPLHSRAHSSPASLQQTYAVGAAKQQQHAKQR  
SYDVSSAIDELGPLPQGWQARTPEGQIYYLNHLTRTTQWEDPRKSLAAQAANQHQRSAEQLLSPGNDSGSSTNA  
TSTPTNSPPHIHSTLQGANKNVTLGPLPDGWEQAVTGDGETYFINHIARTTSWFDPRIPVHLQRAPTSGAVLPSG  
SASWLLNGASGLSQSLQVTQOKLRLHSLQLERERLKSQQEIIROQDLMLRSGQTNNDLDPFLSCSSSSVDHSRQ  
ESADSGLGLGNNYSLPHTPEDFLSSNMDDNMDCTSESNDNPGPSSDMSVVDSDQEMSTLDVTDLVPQLGDEFSS  
DILDEVQLLIDPNNKPGSILTWL PLRMRQLPKSFFNPP

rs:XP\_015720879 [XP\_015720879] PREDICTED: protein **FAM181A** [Coturnix japonica]. 127..141

MASDSEVKTLNLFVNLAASSDIKAALDKSAPCRRSVDHRKYLQKQLKRFSQKYSRVPRCHSTKPSECGRP  
RGAEDRTRSCQPEVDPDPGPHNGAAEKVLQAAEVEESLAGEQAVPEQNPEANRPDQVPMRKRQLPASFWEEP  
PRPP

QSLPVRGFPAAPEGLPVPREPPPPFEGKKSRSSEDTTGPESHEPALNAGEKDPTGVLSGRVGAWTCCPFPCGPA  
VYQPPGTLPPSPFPGLGLWRKGTATLPAEAQPFCKEAGTGQKLYRPVVLKPIPTKPTIPSPIFNVFGYL  
PMRKRQLPASFWEEP

rs:XP\_015732722 [XP\_015732722] PREDICTED: uncharacterized protein  
LOC107320912 [Coturnix japonica]. 201..215

MHGAAAPRVSPGPGVSLCTNMAAGVIRPLAELRLPSFPFHGLLLPAHPEPDFPDLSEEDDEEEEEDE  
EEAAEESTACSGPEVPGPSTAETTLRLLRFSELISCDIQRVYFGQRGREEAAGGHNVPEDCSSPHSSPHNASMGHT  
ARGGRAQPEVALSGHGAHRLGPLAELFEYGVHRCLAPRVASGKTQRLERKYGHITPMHRRKLPPSFWRP  
GSLHTGTPDFSDLLAHWTVEPGPELPGSGRELPPVPGHTGLETEPYSGL PMHRRKLPPSFWRP

rs:XP\_015753743 [XP\_015753743] PREDICTED: transcriptional coactivator  
YAP1-like [Acropora digitifera]. 46..60

MERTNNNCVVHVRQDSDTLEALFHVVNPTTVPNSHPDTPANSLPMRLRKLPPSFFKQPPIDGGLSPE  
TDHPSGLQISHSRAHSSPASITVPSSLKGPNNHSLSSVVHQSTSFNDTALLEEPAQMPPGWEIRSTP  
NHFDQITTWQDPRKTQSTSNLNSAQTSAASLPDGWEQAITPEGDIYYINHIERTTSWVDPRIALQCRS  
QENVRSSS IMPEMYRHRTIQHLRQLREREQLLKRQOELLKQEIKLKRDILEEGGTSKSSLLGNLTREGL  
LPPHQDSTPVTNGGG HIRDQSFDSGLGMGGGNYHDIDMNESQPMFDANYSKDSYRTDASRRLPEILD  
SLPATNVLDLGMVEGNDSSSNM DTDDLGVGLEFNSEMLNDVENFMSPGNKMSDNFLTWL PMRLRKLPPS  
FFKQPP

rs:XP\_016029386 [XP\_016029386] uncharacterized protein Dsimw501\_GD24973,  
isoform C [Drosophila simulans].>rs:XP\_015011529 [XP\_015011529]  
transcriptional coactivator yorkie isoform X2 [Drosophila  
erecta].>tr:B4QBI7\_DROSI [B4QBI7] SubName: Full=GD24973  
{ECO:0000313|EMBL:EDX08505.1}; 88..102

MCACLIAKIILCSFRLYTISAFYMLTTMSASSNTNSLIEKEIDDEDMLSPIKSNLNVVRVQD  
TDDNLQ ALFDSVLNPGDAKRPLQLPLMRKLPNSFFTPPAPSHSRANSADSTYDAGSQSSINIGNKASIV  
QQPDGQSPIAA IPQLQIQSPQHSRLAIHHSRARSSPASLQQNYNVRARSDAAAANNPNANPSSQQQ  
PAGPTFFPNSAQEFPSGAP ASSAIDLAMNTCMSQDIPMSMQTVHKKQRSYDVISPIQLNRQLGAL  
PPGWEQAKTNDGQIYYLNHTTKSTQWED PRIQYRQQQILMAERIKQNESGLSVLDCPDNLVSS  
LQIEDNLCSNLFNDAQAIVNPPSSHKPDDEWYKIN PLRMRKLPNSFFTPP

rs:XP\_007529132 [XP\_007529132] PREDICTED: protein **FAM181A** [Erinaceus  
europaeus].>tr:A0A1S3A4B3\_ERIEU [A0A1S3A4B3] SubName: Full=protein **FAM181A**  
{ECO:0000313|RefSeq:XP\_007529132.1}; 120..134

MASDSVDMKLLNFVNLAASSDIKAALDKSAPCRRSVDHRKYLQKQLKRFSQKYARLPRGLPGRG  
TESLLR RPSLHPGPEPTGGAGGYQEPALGRPYREECLSQELGPPGLNPEVAGPGQVPMRKRQLPAS  
FWEEP  
PRPTHSCPLGL DGALGLREAPPYEGKQHCGLGSLGPEVVPVSPASPQPHAEKELLKMPGVSL  
LGCTNAWSSCCPFQCRGHPVYPGLP GALAPSPTPLGLFWRKSPATPGELAHFCKDADGLGPKV  
HRPVVLKPIPTKPAIPPIFNVFGYL PMRKRQLPASFWEEP

rs:XP\_016067971 [XP\_016067971] PREDICTED: protein **FAM181A** [Miniopterus  
natalensis]. 129..143

MASDSVDMKLLNFVNLAASSDIKAALDKSAPCRRSVDHRKYLQKQLKRFSQKYSRLPRGLPGRG  
AEQHLK RGPEERPGRLPLNPGPDSSPSSGGDCKEKALGNPYREECLSQEQLQGNPEAARPGQV  
PMRKRQLPASFWEEP  
PRPTHSCPLGL PTHSYPMGLEGLVLPREAPPYEGKRYCKGLELLGPEMALIPMSPRVLAEKET  
PKMPGVSLVGRVNAWSSCCPFQYH GQPIYQGGP GALPQGPVPSLGLWRKSPVSPGELAHFCK  
DQVDVDPGQKIYRPVVLKPIPTKPAIPPIFNVFGYL PMRKRQLPASFWEEP

rs:XP\_007553200 [XP\_007553200] PREDICTED: protein **FAM181A** [Poecilia  
formosa]. 102..116

MSSADSEVKTLNLFVNLAASSDIKAALDKSAPCRRSVDHRKYLQKQLKRFSQKFSRVPRGQTLT  
SADYRC ARGAEQRVTVTDEASSDAQLAQSVGGVMDQVPMRKRQLPASFWEEP  
PRLTKARRDKPCLDLRRSSSSGTSDDGEN ERRRSQEDAQKTANSSSGRRSSAEKEVLKLDLTS  
HRSVSFCSCCPFFQFQGHQVLHSQIVVPHPPFGLWSKAAEPE RSEHPYQKLH  
THVVVKPIPTKATAQSPILSVFGFI PMRKRQLPASFWEEP

rs:XP\_001948042 [XP\_001948042] PREDICTED: transcriptional coactivator  
YAP1 [Acyrtosiphon pisum].>tr:J9JSR2\_ACYPI [J9JSR2] SubName:  
Full=Uncharacterized protein {ECO:0000313|EnsemblMetazoa:ACYPI003364-PA};

66..80

MSGLQQQQQEQHQQVS IKMEPIGPSSPPSGVNSNLVVRVDQNSSETDLQALFDTVLKPDGKKPLQLPLRM  
RQLPKSFFNPPSTGSKSPSISHSRENSGDSAFGTANVGPSCSGPVPLHSRAHSSPASLQQTYAVGAAMQQQKQQH  
AKQRSYDISSTIDELGPLPQGWEQARTPEGQIYYLNHLTRTTQWEDPRKSLAAQAANQHORSAEQLLSPGNDSGS  
STNATSTPTNSPPHIHSTLQGANKNVTGLGPLPEGWEQAVTGDGETYFINHIARTTSWFDPRI PVHLQRAPTS GAV  
LPSGSASWLANGVSGLSQSLQASQQKRLRLQSLQLERERLKSRRQOEIIRQQDLMQRSQGTNNDLDPFLSCSSSSVD  
HSRQESADSGLGNNYSLPHTPEDFLSSNMDDNMDCTSESDNPGPSSMSVVDSQEMSTLDVTDLVP SLQLGDE  
FISMDEVQLLIDPNKPGSILTWL PLRMRQLPKSFFNPP

rs:XP\_008108819 [XP\_008108819] PREDICTED: protein **FAM181A** [Anolis  
carolinensis]. 144..158

MASSADSEVKTLNLFVNLAASDIKAALDKSAPCRRSVDHRKYLQKQLKRFSQKYARLPRCHHHHHPHH  
MQQPSSLRERKAELEGKSRGLNTSESPEASEGRVAVVATTSASILAQSDKACKADHERQQQGTSEALARPQV  
MRKRQLPASFWEEPRTQGPLSLFASSPLSSSKDLLPLYEGKKS LKGPDPGFASLKNLVPLYEGKKS HKGPD  
SKDL PPLYEGKKRQKGS DGGT SERPD AEALQV LSTWGCWPFQCHGPQTS PGLYV PPLP LAAALP  
SPAAPFPALGL WRKNGGSSMEGEAFGLGGMGQKVYHRPVVWKPIPTKPAAPPATLFSVFGYI PMRKRQLPASFWEEP

rs:XP\_008106265 [XP\_008106265] PREDICTED: transcriptional coactivator  
YAP1 isoform X1 [Anolis carolinensis]. 72..86

MEASTTGQTPPQASAPESGGSGQPQQQAPPPPPPPAGHQIVHVRGDSETDLEALFNAVMPKGANVPH  
TLPMLRRLKLPDSFFKPPPEPKAHSRQASTDAGTAGALTPQH IRAHSSPASLQLGTVSPGALTPSSVVP  
GGAPSOHL RQSSFEIPDDVPLPPGWEMAKTPSGQRYFLNHIDQTTTWQDPRKALLSQMNATAPT  
SPPVQQNIMNSATGPLPDG WEQAMTQDGEIYYINHKNKTTSWLDPRLDPRFAMSQRISQSTPVKPP  
PLAPQSPPGGVLGGGNSQQQQMRLQQL QMEKERLRLKHQELLRQVRPQALRNINPSTANS  
PKRQELALRSQLPSMDQDGSQNPVSSPGMSQELRTMTTNSSD PFLNSGTYHSRDESTDSGL  
SMSSYSVPRTPDDFLNSVEEMDTGDTINQSNIPSHQNRFPDYLEAIPGTNVDLGTLEGD  
AMNIEGEEELMPSLQEQALSSDILNDMESVLAATKLDKESFLTWL PMRLRRLKLPDSFFKPP

rs:XP\_003219348 [XP\_003219348] PREDICTED: transcriptional coactivator  
YAP1 isoform X2 [Anolis carolinensis].>tr:G1KMR2\_ANOCA [G1KMR2] SubName:  
Full=Yes associated protein 1 {ECO:0000313|Ensembl:ENSACAP00000012509};  
72..86

MEASTTGQTPPQASAPESGGSGQPQQQAPPPPPPPAGHQIVHVRGDSETDLEALFNAVMPKGANVPH  
TLPMLRRLKLPDSFFKPPPEPKAHSRQASTDAGTAGALTPQH IRAHSSPASLQLGTVSPGALTPSSVVP  
GGAPSOHL RQSSFEIPDDVPLPPGWEMAKTPSGQRYFLNHIDQTTTWQDPRKALLSQMNATAPT  
SPPVQQNIMNSATGPLPDG WEQAMTQDGEIYYINHKNKTTSWLDPRLDPRFAMSQRISQSTPVKPP  
PLAPQSPPGGVLGGGNSQQQQMRLQQL QMEKERLRLKHQELLRQVRPQALRNINPSTANS  
PKRQELALRSQLPSMDQDGSQNPVSSPGMSQELRTMTTNSSD PFLNSGTYHSRDESTDSGL  
SMSSYSVPRTPDDFLNSVEEMDTGDTINQSNIPSHQNRFPDYLEAIPGTNVDLGTLEGD  
AMNIEGEEELMPSLQEQALSSDILNDMESVLAATKLDKESFLTWL PMRLRRLKLPDSFFKPP

rs:XP\_016848161 [XP\_016848161] PREDICTED: transcriptional coactivator  
YAP1 isoform X3 [Anolis carolinensis]. 72..86

MEASTTGQTPPQASAPESGGSGQPQQQAPPPPPPPAGHQIVHVRGDSETDLEALFNAVMPKGANVPH  
TLPMLRRLKLPDSFFKPPPEPKAHSRQASTDAGTAGALTPQH IRAHSSPASLQLGTVSPGALTPSSVVP  
GGAPSOHL RQSSFEIPDDVPLPPGWEMAKTPSGQRYFLNHIDQTTTWQDPRKALLSQMNATAPT  
SPPVQQNIMNSATGPLPDG WEQAMTQDGEIYYINHKNKTTSWLDPRLDPRFAMSQRISQSTPVKPP  
PLAPQSPPGGVLGGGNSQQQQMRLQQL QMEKERLRLKHQELLRQVRPQALRNINPSTANS  
PKRQELALRSQLPSMDQDGSQNPVSSPGMSQELRTMTTNSSD PFLNSGTYHSRDESTDSGL  
SMSSYSVPRTPDDFLNSVEEMDTGDTINQSNIPSHQNRFPDYLEAIPGTNVDLGTLEGD  
AMNIEGEEELMPSLQEQALSSDILNDMESVLAATKLDKESFLTWL PMRLRRLKLPDSFFKPP

rs:XP\_008106266 [XP\_008106266] PREDICTED: transcriptional coactivator  
YAP1 isoform X4 [Anolis carolinensis]. 72..86

MEASTTGQTPPQASAPESGGSGQPQQQAPPPPPPPAGHQIVHVRGDSETDLEALFNAVMPKGANVPH  
TLPMLRRLKLPDSFFKPPPEPKAHSRQASTDAGTAGALTPQH IRAHSSPASLQLGTVSPGALTPSSVVP  
GGAPSOHL RQSSFEIPDDVPLPPGWEMAKTPSGQRYFLNHIDQTTTWQDPRKALLSQMNATAPT  
SPPVQQNIMNSATGPLPDG WEQAMTQDGEIYYINHKNKTTSWLDPRLDPRFAMSQRISQSTPVKPP  
PLAPQSPPGGVLGGGNSQQQQMRLQQL QMEKERLRLKHQELLRQVRPQALRNINPSTANS  
PKRQELALRSQLPSMDQDGSQNPVSSPGMSQELRTMTTNSSD PFLNSGTYHSRDESTDSGL  
SMSSYSVPRTPDDFLNSVEEMDTGDTINQSNIPSHQNRFPDYLEAIPGTNVDLGTLEGD  
AMNIEGEEELMPSLQEQALSSDILNDMESVLAATKLDKESFLTWL PMRLRRLKLPDSFFKPP

rs:XP\_008106267 [XP\_008106267] PREDICTED: transcriptional coactivator  
YAP1 isoform X5 [Anolis carolinensis]. 72..86

MEASTTGQTTPQASAPESGGSGQPQQQAPPPPPPPAGHQIVHVRGDSETDLEALFNAVMPKGANVPH  
TLPMLRKLKLPDSFFKPPPEPKAHSRQASTDAGTAGALTPQHIRAHSSPASLQLGTVSPGALTPSSVVPGGAPSQHL  
RQSSFEIPDDVPLPPGWEMAKTPSGQRYFLNHIDQTTTWQDPRKALLSQMNATAPTSPVQONIMNSATAMSQRI  
SQSTPVKPPPLAPQSPGGVVLGGGNSSQQQOMRLQQLQMEKERLRLKHQELLRQVRPQALRNINPSTANSFKRQE  
LALRSQLPMSDQDGSQNPVSSPGMSQELRTMTTNSDDPFLNSGTYHSRDESTDSGLSMSSYSVPRTPDFFLNSVE  
EMDTGDTINQSNIPSHQNRFPDYLEAIPGTNVDLGTLEGDAMNIEGEEELMPSLQEQALSSDILNDMESVLAATKLD  
KESFLTWL PMRLRKLKLPDSFFKPP

rs:XP\_008106268 [XP\_008106268] PREDICTED: transcriptional coactivator  
YAP1 isoform X6 [Anolis carolinensis]. 72..86

MEASTTGQTTPQASAPESGGSGQPQQQAPPPPPPPAGHQIVHVRGDSETDLEALFNAVMPKGANVPH  
TLPMLRKLKLPDSFFKPPPEPKAHSRQASTDAGTAGALTPQHIRAHSSPASLQLGTVSPGALTPSSVVPGGAPSQHL  
RQSSFEIPDDVPLPPGWEMAKTPSGQRYFLNHIDQTTTWQDPRKALLSQMNATAPTSPVQONIMNSATAMSQRI  
SQSTPVKPPPLAPQSPGGVVLGGGNSSQQQOMRLQQLQMEKERLRLKHQELLRQALRNINPSTANSFKRQELALR  
SQLPSMDQDGSQNPVSSPGMSQELRTMTTNSDDPFLNSGTYHSRDESTDSGLSMSSYSVPRTPDFFLNSVEEMDT  
GDTINQSNIPSHQNRFPDYLEAIPGTNVDLGTLEGDAMNIEGEEELMPSLQEQALSSDILNDMESVLAATKLDKESF  
LTWL PMRLRKLKLPDSFFKPP

rs:XP\_016848162 [XP\_016848162] PREDICTED: transcriptional coactivator  
YAP1 isoform X7 [Anolis carolinensis]. 72..86

MEASTTGQTTPQASAPESGGSGQPQQQAPPPPPPPAGHQIVHVRGDSETDLEALFNAVMPKGANVPH  
TLPMLRKLKLPDSFFKPPPEPKAHSRQASTDAGTAGALTPQHIRAHSSPASLQLGTVSPGALTPSSVVPGGAPSQHL  
RQSSFEIPDDVPLPPGWEMAKTPSGQRYFLNHIDQTTTWQDPRKALLSQMNATAPTSPVQONIMNSATAMSQRI  
SQSTPVKPPPLAPQSPGGVVLGGGNSSQQQOMRLQQLQMEKERLRLKHQELLRQVRPQELALRSQLPMSDQDGSQ  
NPVSSPGMSQELRTMTTNSDDPFLNSGTYHSRDESTDSGLSMSSYSVPRTPDFFLNSVEEMDTGDTINQSNIPSH  
QNRFPDYLEAIPGTNVDLGTLEGDAMNIEGEEELMPSLQEQALSSDILNDMESVLAATKLDKESFLTWL  
PMRLRKLKLPDSFFKPP

rs:XP\_008106270 [XP\_008106270] PREDICTED: transcriptional coactivator  
YAP1 isoform X8 [Anolis carolinensis]. 72..86

MEASTTGQTTPQASAPESGGSGQPQQQAPPPPPPPAGHQIVHVRGDSETDLEALFNAVMPKGANVPH  
TLPMLRKLKLPDSFFKPPPEPKAHSRQASTDAGTAGALTPQHIRAHSSPASLQLGTVSPGALTPSSVVPGGAPSQHL  
RQSSFEIPDDVPLPPGWEMAKTPSGQRYFLNHIDQTTTWQDPRKALLSQMNATAPTSPVQONIMNSATAMSQRI  
SQSTPVKPPPLAPQSPGGVVLGGGNSSQQQOMRLQQLQMEKERLRLKHQELLRQELALRSQLPMSDQDGSQNPVS  
SPGMSQELRTMTTNSDDPFLNSGTYHSRDESTDSGLSMSSYSVPRTPDFFLNSVEEMDTGDTINQSNIPSHQNR  
FDYLEAIPGTNVDLGTLEGDAMNIEGEEELMPSLQEQALSSDILNDMESVLAATKLDKESFLTWL  
PMRLRKLKLPDSFFKPP

rs:XP\_008106371 [XP\_008106371] PREDICTED: protein **FAM181B** [Anolis  
carolinensis].>rs:XP\_008106372 [XP\_008106372] PREDICTED: protein **FAM181B**  
[Anolis carolinensis]. 263..277

MAVQAAPLAPHGHPFLPFGFSALPAGSLGDFGDLKGFEEGSTLLLLDGGTADGDPGDFKELLSFIDSAS  
SNIKLALDKPVKSKRKVNHRKYLQKQIKRCNGIIGGTSQTQESSNPSSQPSFTNSMNSSHPHQQLNVHKRTSVS  
LSPPSGGAHISKPPQPPNAHKRTTASLLPSSVTAACHKPPFQQKRTNPSLSPSSGGAVHCKPPQPSKRASAA  
TLVQSQSLAALFDSLQPSGVGLSSMQPEGGLGSSVPHVVGKVPPLRHRNLPPSFFTEPSSHSLKEPGPEELFDLLE  
YGGLLPEQQQQTSETSVFAPSRLQTSSELGLEGPGLYESLPLPALLYSTETPLRPLPALYGPAAAPSDSGSGELTAA  
GPHLPSGAAPVFPFFDCPPLPAAYQYAPSGYSRNGALFQPLV PLRHRNLPPSFFTEP

rs:XP\_016927695 [XP\_016927695] PREDICTED: transcriptional coactivator  
yorkie isoform X1 [Drosophila suzukii]. 90..104

MCACLIAKIFLCSFRLYTISAFYMLTTMSASSNSNANSNANLIEKEIDDEDMLSPIKSNLNVVRVNQDTPDDN  
LQALFDSVLNPGDAKRPLQLPLMRKLPNSFFTPPAPSHSRANSADSTYDAGSQSNISIGNKAAQVQQPDGQSP  
IAAIPTLQIQPSPQHSRLAIHHSRARSPPASLQONFNVRARSDAANNPNANPSSQQQPAGPTFPENSAQEFPSG  
APASSGQIDLDAMNTCMSQDIPMSMQTVHKKQRSYDVISPIQLQRQLGALPPGWEQAKTNDGQIYYLNHTTKSTQ  
WEDPRIQYRQQQILMAERIKQNDVLTQTTKQTTTSTIANMGLPDGWEQAVTESGDLYFINHIDRTTSWNDPRM  
QSGLSVLDPCDNLVSSLQIEDNLCSNLFNDAQAIVNPPSSHKPDDELEWYKIN PLRMRKLPNSFFTPP

rs:XP\_016927696 [XP\_016927696] PREDICTED: transcriptional coactivator  
yorkie isoform X2 [Drosophila suzukii]. 90..104

MCACLIAKIFLCSFRLYTISAFYMLTTMSASSNSNANSLIEKEIDDEDMLSPIKSNLNVVRVNQDTDDN  
LQALFDSVLNPGDAKRPLQLPLMRKLPNSFFTPPAPSHSRANSADSTYDAGSQSNISIGNKAAQVVQQPDGQSP  
IAAIPTLQIQPSPQHSRLAIHHSRARSPPASLQQNFNVRARSDAANNPNANPSSQQQPAGPTFFPNSAQEFPSG  
APASSGQIDLDAMNTCMSQDIPMSMQTVHKKQRSYDVISPIQLQRQLGALPPGWEQAKTNDGQIYYLNHTTKSTQ  
WEDPRIQYRQQQILMAERIKQNESGLSVLDCPDNLVSSLQIEDNLCSNLFNDAQAIVNPPSSHKPDDLEWYKIN  
PLMRKLPNSFFTPP

rs:XP\_016971390 [XP\_016971390] PREDICTED: transcriptional coactivator  
yorkie isoform X1 [Drosophila rhopaloa]. 88..102

MCACLIAKIILCSFHLYTISAFYMLTTMSASSNTNSLIEKEIDDEDMLSPIKSNLNVVRVNQDTDDNLQ  
ALFDSVLNPGDAKRPLQLPLMRKLPNSFFTPPAPSHSRANSADSTYDAGSQSNISNKSQVVQQVQGGPDGQSSI  
AAIPQIQPSPQHSRLVIHHSRARSPPASLQQNYNVRARSDAANNPNANPSSQQPTAGPTFFPNSAQEFPSGAPAS  
SIDLDAMNTCMSQDIPMSMQTVHKKQRSYDVVSPIQLQRQLGALPPGWEQAKTNDGQIYYLNHTTKSTQWEDPRI  
QYRQQQILMAERIKQNDVLQTTKQTTTSTIANMNGPLPDGWEQAVTESGDLYFINHIDRTTSWNDPRMQSGLSV  
LDCPDNLVSSLQIEDNLCSNLFNDAQAIVNPPSSHKPDDLEWYKIN PLMRKLPNSFFTPP

rs:XP\_016971391 [XP\_016971391] PREDICTED: transcriptional coactivator  
yorkie isoform X2 [Drosophila rhopaloa]. 88..102

MCACLIAKIILCSFHLYTISAFYMLTTMSASSNTNSLIEKEIDDEDMLSPIKSNLNVVRVNQDTDDNLQ  
ALFDSVLNPGDAKRPLQLPLMRKLPNSFFTPPAPSHSRANSADSTYDAGSQSNISNKSQVVQQVQGGPDGQSSI  
AAIPQIQPSPQHSRLVIHHSRARSPPASLQQNYNVRARSDAANNPNANPSSQQPTAGPTFFPNSAQEFPSGAPAS  
SIDLDAMNTCMSQDIPMSMQTVHKKQRSYDVVSPIQLQRQLGALPPGWEQAKTNDGQIYYLNHTTKSTQWEDPRI  
QYRQQQILMAERIKQNESGLSVLDCPDNLVSSLQIEDNLCSNLFNDAQAIVNPPSSHKPDDLEWYKIN  
PLMRKLPNSFFTPP

rs:XP\_017018760 [XP\_017018760] PREDICTED: transcriptional coactivator  
yorkie isoform X1 [Drosophila kikkawai]. 60..74

MSTSNTNNLIEKEIDDEDMLSPIKPNLNVVRVNQDTDDNLQALFDSVLNPGDAKRPLQLPFRMRKLPNS  
FFTPPAPSHSRANSADSTYDAGSQSNISNISSIKAAQPVQDQPPISAIQIQPSPQQSRLAIHHFRARSPPASL  
QQNYNVRARSEANPGASQQPAGPTFFPNSAAEFTSSGATAPSSIELDAMNSCMSQDMPMSTQTVHKKQRSYDVVS  
PIQLQRQLGALPPGWEQAKTNDGQIYYLNHTTKSTQWEDPRIQFRQQQSLMAERIKQNDVLQTTKQTTTSTIAN  
NMGGPLPDGWEQAVTESGDYFINHIDRTTSWNDPRMQSGLSVLDCPDNLVSSLQIEDNICSNLFNDAQTIVNP  
PSSHKPDDLEWYKIN PFRMRKLPNSFFTPP

rs:XP\_017018761 [XP\_017018761] PREDICTED: transcriptional coactivator  
yorkie isoform X2 [Drosophila kikkawai]. 60..74

MSTSNTNNLIEKEIDDEDMLSPIKPNLNVVRVNQDTDDNLQALFDSVLNPGDAKRPLQLPFRMRKLPNS  
FFTPPAPSHSRANSADSTYDAGSQSNISNISSIKAAQPVQDQPPISAIQIQPSPQQSRLAIHHFRARSPPASL  
QQNYNVRARSEANPGASQQPAGPTFFPNSAAEFTSSGATAPSSIELDAMNSCMSQDMPMSTQTVHKKQRSYDVVS  
PIQLQRQLGALPPGWEQAKTNDGQIYYLNHTTKSTQWEDPRIQFRQQQSLMAERIKQNESGLSVLDCPDNLVSS  
LQIEDNICSNLFNDAQTIVNPPSSHKPDDLEWYKIN PFRMRKLPNSFFTPP

rs:XP\_008398305 [XP\_008398305] PREDICTED: protein **FAM181A** [Poecilia  
reticulata]. 102..116

MSSADSEVKTLNLFVNLAASSDIKAALDKSAPCRRSVDHRKYLQKQLKRFSQKFSRVPRAKSLTSADYRC  
ARGAERQRATATDEASSDAQHAQSVGGVMDQVPMRKRQLPASFWEEPRLTKARRDKPCLDLRRSSSSGTSDDGEN  
EKRRRSQDDAQKSANSSSGRRSSAEKEVLKLDLTSRHSVSFCSCCPFQFQGHQVLHSQIVVPHPPFGLWSKAAEP  
ERSEDPYQQLHTHVVVKPIPTKATVQSPIFSVFGFI PMRKRQLPASFWEEP

rs:XP\_006509915 [XP\_006509915] PREDICTED: transcriptional coactivator  
YAP1 isoform X1 [Mus musculus]. 70..84

MEPAQQPPQPAPQGPAPPSVSPAGTPAAPPAPPAGHQVVHVRGDSETDLEALFNAVMPKTANVPQTV  
PMRLRKLKLPDSFFKPEPKSHSRQASTDAGTAGALTPQHVRHSSPASLQLGAVSPGTLTASGVVSGPAAAPAAQH  
LRQSSFEIPDDVPLPAGWEMAKTSSGQRYFLNHNDQTTTWQDPRKAMLSQLNVPAPASPAVPQTLMNSASGPLPD  
GWEQAMTQDGEVYYINHNKTTSWLDPRLDPRFGKAMNQRITQSAPVKQPPPLAPQSPQGGVVGSSNQQQQIQ  
LQQLQMEKERLRLKQOELFRQVRPQAIRNINPSTANAPKCQELALRSQLPTLEQDGGTNAVSSPGMSQELRMT

TNSSDPFLNSGTYHSRDESTDSGLSMSSYSIPRTPDDFLNSVDEMDTGDTISQSTLPSQQSRFPDYLEALPGTNV  
DLGTLEGDAMNIEGEEMLPMSLQEQALSSEILDVESVLAATKLDKESFLTWL PMRLRKLPSFFKPP

rs:XP\_006509916 [XP\_006509916] PREDICTED: transcriptional coactivator  
YAP1 isoform X2 [Mus musculus]. 70..84

MEPAQQPPPQPAPQGPAPPSVSPAGTPAAPPAPPAGHQVVHVRGDSETDLEALFNAVMPKNTANVPQTV  
PMRLRKLPSFFKPPPEPKSHSRQASTDAGTAGALTPQHVAHSSPASLQLGAVSPGTLTASGVVSGPAAAPAAQH  
LRQSSFEIPDDVPLPAGWEMAKTSSGQRYFLNHNDQTTTWQDPRKAMLSQLNVPAPASPAVPQTLMNSASGPLPD  
GWEQAMTQDGEVYYINHKNKTTSWLDPRLDPRFAMNQRITQSAPVKQPPPLAPQSPQGGVLGGGSSNQQQQIQIQ  
QLQMEKERLRLKQOELFRQVRPQAIRNINPSTANAPKCQELALRSQLPTLEQDGGTPNAVSSPGMSQELRTMTTN  
SSDPFLNSGTYHSRDESTDSGLSMSSYSIPRTPDDFLNSVDEMDTGDTISQSTLPSQQSRFPDYLEALPGTNVLDL  
GTLEGDAMNIEGEEMLPMSLQEQALSSEILDVESVLAATKLDKESFLTWL PMRLRKLPSFFKPP

rs:XP\_006509917 [XP\_006509917] PREDICTED: transcriptional coactivator  
YAP1 isoform X3 [Mus musculus]. 70..84

MEPAQQPPPQPAPQGPAPPSVSPAGTPAAPPAPPAGHQVVHVRGDSETDLEALFNAVMPKNTANVPQTV  
PMRLRKLPSFFKPPPEPKSHSRQASTDAGTAGALTPQHVAHSSPASLQLGAVSPGTLTASGVVSGPAAAPAAQH  
LRQSSFEIPDDVPLPAGWEMAKTSSGQRYFLNHNDQTTTWQDPRKAMLSQLNVPAPASPAVPQTLMNSASGPLPD  
GWEQAMTQDGEVYYINHKNKTTSWLDPRLDPRFGKAMNQRITQSAPVKQPPPLAPQSPQGGVLGGGSSNQQQQIQ  
LQQLQMEKERLRLKQOELFRQAIRNINPSTANAPKCQELALRSQLPTLEQDGGTPNAVSSPGMSQELRTMTTNSS  
DPFLNSGTYHSRDESTDSGLSMSSYSIPRTPDDFLNSVDEMDTGDTISQSTLPSQQSRFPDYLEALPGTNVLDLGT  
LEGDAMNIEGEEMLPMSLQEQALSSEILDVESVLAATKLDKESFLTWL PMRLRKLPSFFKPP

rs:XP\_006509918 [XP\_006509918] PREDICTED: transcriptional coactivator  
YAP1 isoform X4 [Mus musculus]. 70..84

MEPAQQPPPQPAPQGPAPPSVSPAGTPAAPPAPPAGHQVVHVRGDSETDLEALFNAVMPKNTANVPQTV  
PMRLRKLPSFFKPPPEPKSHSRQASTDAGTAGALTPQHVAHSSPASLQLGAVSPGTLTASGVVSGPAAAPAAQH  
LRQSSFEIPDDVPLPAGWEMAKTSSGQRYFLNHNDQTTTWQDPRKAMLSQLNVPAPASPAVPQTLMNSASGPLPD  
GWEQAMTQDGEVYYINHKNKTTSWLDPRLDPRFGKAMNQRITQSAPVKQPPPLAPQSPQGGVLGGGSSNQQQQIQ  
LQQLQMEKERLRLKQOELFRQVRPQELALRSQLPTLEQDGGTPNAVSSPGMSQELRTMTTNSSDPFLNSGTYHSR  
DESTDSGLSMSSYSIPRTPDDFLNSVDEMDTGDTISQSTLPSQQSRFPDYLEALPGTNVLDLGTLEGDAMNIEGEE  
LMPMSLQEQALSSEILDVESVLAATKLDKESFLTWL PMRLRKLPSFFKPP

rs:XP\_006509919 [XP\_006509919] PREDICTED: transcriptional coactivator  
YAP1 isoform X5 [Mus musculus]. 70..84

MEPAQQPPPQPAPQGPAPPSVSPAGTPAAPPAPPAGHQVVHVRGDSETDLEALFNAVMPKNTANVPQTV  
PMRLRKLPSFFKPPPEPKSHSRQASTDAGTAGALTPQHVAHSSPASLQLGAVSPGTLTASGVVSGPAAAPAAQH  
LRQSSFEIPDDVPLPAGWEMAKTSSGQRYFLNHNDQTTTWQDPRKAMLSQLNVPAPASPAVPQTLMNSASGPLPD  
GWEQAMTQDGEVYYINHKNKTTSWLDPRLDPRFAMNQRITQSAPVKQPPPLAPQSPQGGVLGGGSSNQQQQIQIQ  
QLQMEKERLRLKQOELFRQVRPQELALRSQLPTLEQDGGTPNAVSSPGMSQELRTMTTNSSDPFLNSGTYHSRDE  
STDSGLSMSSYSIPRTPDDFLNSVDEMDTGDTISQSTLPSQQSRFPDYLEALPGTNVLDLGTLEGDAMNIEGEEML  
PSLQEQALSSEILDVESVLAATKLDKESFLTWL PMRLRKLPSFFKPP

rs:XP\_006509920 [XP\_006509920] PREDICTED: transcriptional coactivator  
YAP1 isoform X6 [Mus musculus]. 70..84

MEPAQQPPPQPAPQGPAPPSVSPAGTPAAPPAPPAGHQVVHVRGDSETDLEALFNAVMPKNTANVPQTV  
PMRLRKLPSFFKPPPEPKSHSRQASTDAGTAGALTPQHVAHSSPASLQLGAVSPGTLTASGVVSGPAAAPAAQH  
LRQSSFEIPDDVPLPAGWEMAKTSSGQRYFLNHNDQTTTWQDPRKAMLSQLNVPAPASPAVPQTLMNSASGPLPD  
GWEQAMTQDGEVYYINHKNKTTSWLDPRLDPRFGKAMNQRITQSAPVKQPPPLAPQSPQGGVLGGGSSNQQQQIQ  
LQQLQMEKERLRLKQOELFRQELALRSQLPTLEQDGGTPNAVSSPGMSQELRTMTTNSSDPFLNSGTYHSRDEST  
DSGLSMSSYSIPRTPDDFLNSVDEMDTGDTISQSTLPSQQSRFPDYLEALPGTNVLDLGTLEGDAMNIEGEEMLPS  
LQEQALSSEILDVESVLAATKLDKESFLTWL PMRLRKLPSFFKPP

rs:XP\_017321913 [XP\_017321913] PREDICTED: transcriptional coactivator  
YAP1 isoform X1 [Ictalurus punctatus].>tr:A0A2D0QU10 ICTPU [A0A2D0QU10]  
SubName: Full=transcriptional coactivator YAP1 isoform X1  
{ECO:0000313|RefSeq:XP\_017321913.1}; 45..59

MDPSQHNPAGHQVVHVRGDSETDLEALFNAVMPKSAVPPSPMRMRKLPSFFKPPPEPKSHSRQAS  
TDAGTAGTLTPQHVAHSSPASLQLSAVTSGMTSTLAPAGAPPQHLRQPSYEIPDDVPLPPGWEMAKTPSGQRYF

LNHIDQSTTWQDPRKAMLQMNQTNASASPVPVQQNLLNPATGPLEGWEQAITAEGEIYYINHKNKTTSWLDPRL  
DPRYALNQQRITQSAPVKQGTQLPSSPQNPAVMGGNNQMRLLQQLQLEKERLRLKHOELLRPRPQELALRNQLPTS  
MEQDSGTQNPVSSPGMGQDGRSMTTNSSDPFLNSGTYHSRDESTDSGLSMSSYSVPRTPDFFLNSVDEMETSDSL  
GPVSLATQPSRFPNYLDEIPGTDVDLGTLEGESMAVEGEELMPSLQEQALSSDILNDMESVLAATKIDKESFLTWL  
PMRMRKLPDSFFKPP

rs:XP\_017321914 [XP\_017321914] PREDICTED: transcriptional coactivator  
YAP1 isoform X2 [Ictalurus punctatus].>tr:A0A2D0QUC7 ICTPU [A0A2D0QUC7]  
SubName: Full=transcriptional coactivator YAP1 isoform X2  
{ECO:0000313|RefSeq:XP\_017321914.1}; 45..59

MDPSQHNPPAGHQVVHVRGDSETDLEALFNAVMPKSAVPPSVPMRMRKLPDSFFKPPPEPKSHSRQAS  
TDAGTAGTLTPQHVRHSSPASLQLSAVTSGMTSTLAPAGAPPQHLRQPSYEIPDDVPLPPGWEMAKTPSGQRYF  
LNHIDQSTTWQDPRKAMLQMNQTNASASPVPVQQNLLNPATALNQQRITQSAPVKQGTQLPSSPQNPAVMGGNNQ  
MRLQQLQLEKERLRLKHOELLRPRPQELALRNQLPTSMQDSGTQNPVSSPGMGQDGRSMTTNSSDPFLNSGTYH  
SRDESTDSGLSMSSYSVPRTPDFFLNSVDEMETSDSLGPVSLATQPSRFPNYLDEIPGTDVDLGTLEGESMAVEG  
EELMPSLQEQALSSDILNDMESVLAATKIDKESFLTWL PMRMRKLPDSFFKPP

rs:XP\_017332692 [XP\_017332692] PREDICTED: protein **FAM181A** [Ictalurus  
punctatus].>rs:XP\_017332693 [XP\_017332693] PREDICTED: protein **FAM181A**  
[Ictalurus punctatus].>tr:A0A2D0RQA9 ICTPU [A0A2D0RQA9] SubName:  
Full=protein **FAM181A** {ECO:0000313|RefSeq:XP\_017332692.1,  
ECO:0000313|RefSeq:XP\_017332693.1}; 134..148

MWTRNGLKDKRWLKMSSDSEVKTLNLFVNLLASSDIKAAALDKSAPCRRSVDHRKYLQKQLKRFSQKCP  
TPRCHTHRISESSAAKLTEDKRVMTHERAKNVLLNETQATHTRGEGNVDGNPNSENRSAPGHI PMRKRQLPAS  
WEEPRSSHISFEYAWKSHSGGTVRYGSSEADGEKRTTIEDELKANSWLRVRRGSSDLEPLRVDLTSTNVAVCA  
YC PLQCHGHRLLHSHLITPHSAFTGPGPLRAKTPATELDMQKIKDELKYSSTHVVVKPIPTKPVSSSIFSVFGFI  
PMRKRQLPASFWEEP

rs:XP\_017388556 [XP\_017388556] PREDICTED: transcriptional coactivator  
YAP1 isoform X1 [Cebus capucinus imitator]. 85..99

MDPGQQPPPQAAPQGGQPPAQQPPQGGQGPASAPGQPAPAATQAAPQAPPAGHQIVHVRGDSETDLEALF  
NAVMPNKTANVPQTVPMRLRKLKLPDSFFKPPPEPKSHSRQASTDAGTAGALTPQHVRHSSPASLQLGAVSPGTLTP  
TGVSVPAAATPTAQHLRQSSFEIPDDVPLPAGWEMAKTSSGQRYFLNHIDQTTTWQDPRKAMLSQMNVTAPTSP  
VQQNMMNSASGPLPDGWEQAMTQDGEIYYINHKNKTTSWLDPRLDPRFGKAMNQRISQSAPVKQPPPLAPQSPQ  
GVMGGSSSNQQQMRLLQQLQMEKERLRLKQOELLRQVRPQAMRNINPSTANSPKCQELALRSQLEQDGGTQ  
NPVSSPGMSQELRTMTTNSSDPFLNSGTYHSRDESTDSGLSMSSYSVPRTPDFFLNSVDEMDTGDITINQSTLPS  
QNRFPDYLEAIPGTNVDLGTLEGDGMNIEGEELMPSLQEQALSSDILNDMESVLAATKLDKESFLTWL  
PMRLRKLKLPDSFFKPP

rs:XP\_017388557 [XP\_017388557] PREDICTED: transcriptional coactivator  
YAP1 isoform X2 [Cebus capucinus imitator]. 85..99

MDPGQQPPPQAAPQGGQPPAQQPPQGGQGPASAPGQPAPAATQAAPQAPPAGHQIVHVRGDSETDLEALF  
NAVMPNKTANVPQTVPMRLRKLKLPDSFFKPPPEPKSHSRQASTDAGTAGALTPQHVRHSSPASLQLGAVSPGTLTP  
TGVSVPAAATPTAQHLRQSSFEIPDDVPLPAGWEMAKTSSGQRYFLNHIDQTTTWQDPRKAMLSQMNVTAPTSP  
VQQNMMNSASGPLPDGWEQAMTQDGEIYYINHKNKTTSWLDPRLDPRFAMNQRISQSAPVKQPPPLAPQSPQGG  
V MGGSSSNQQQMRLLQQLQMEKERLRLKQOELLRQVRPQAMRNINPSTANSPKCQELALRSQLEQDGGTQNPV  
SSPGMSQELRTMTTNSSDPFLNSGTYHSRDESTDSGLSMSSYSVPRTPDFFLNSVDEMDTGDITINQSTLPSQ  
QNRFPDYLEAIPGTNVDLGTLEGDGMNIEGEELMPSLQEQALSSDILNDMESVLAATKLDKESFLTWL  
PMRLRKLKLPDSFFKPP

rs:XP\_017388558 [XP\_017388558] PREDICTED: transcriptional coactivator  
YAP1 isoform X3 [Cebus capucinus imitator].>tr:A0A2K5S119\_CEBCA  
[A0A2K5S119] SubName: Full=Uncharacterized protein  
{ECO:0000313|Ensembl:ENSCCAP00000034056}; 85..99

MDPGQQPPPQAAPQGGQPPAQQPPQGGQGPASAPGQPAPAATQAAPQAPPAGHQIVHVRGDSETDLEALF  
NAVMPNKTANVPQTVPMRLRKLKLPDSFFKPPPEPKSHSRQASTDAGTAGALTPQHVRHSSPASLQLGAVSPGTLTP  
TGVSVPAAATPTAQHLRQSSFEIPDDVPLPAGWEMAKTSSGQRYFLNHIDQTTTWQDPRKAMLSQMNVTAPTSP  
VQQNMMNSASGPLPDGWEQAMTQDGEIYYINHKNKTTSWLDPRLDPRFGKAMNQRISQSAPVKQPPPLAPQSPQ  
GVMGGSSSNQQQMRLLQQLQMEKERLRLKQOELLRQAMRNINPSTANSPKCQELALRSQLEQDGGTQNPVSS

PGMSQELRTMTTNSSDPFLNSGTYHSRDESTDSGLSMSSYSVPRTPDDFLNSVDEMDTGDTINQSTLPSQQNRFP  
DYLEAIPGTNVDLGTLEGDGMNIEGEELMPSLQEQALSSDILNDMESVLAATKLDKESFLTWL  
PMRLRKLPSFFKPP

rs:XP\_017388559 [XP\_017388559] PREDICTED: transcriptional coactivator  
YAP1 isoform X4 [Cebus capucinus imitator]. 85..99  
MDPGQQPPPQAAPQGQGGPPAQQPPQGGQPASAPGQPAPAATQAAPQAPPAGHQIVHVRGDSETDLEALF  
NAVMNPKTANVPQTVPMRLRKLPSFFKPPPEPKSHSRQASTDAGTAGALTPQHVRHSSPASLQLGAVSPGTLTP  
TGVVSGPAATPTAQHLRQSSFEIPDDVPLPAGWEMAKTSSGQRYFLNHIDQTTTWQDPRKAMLSQMNVTAPTSPP  
VQQNMMNSASGPLPDGWEQAMTQDGEIYYINHKNKTTSWLDPRLDPRFAMNQRISSAPVKQPPPLAPQSPQGGV  
MGGSSSNQQQQMRLQQLQMEKERLRLKQOELLRQAMRNINPSTANSKPCQELALRSQLPTLEQDGGTQNPVSSPG  
MSQELRTMTTNSSDPFLNSGTYHSRDESTDSGLSMSSYSVPRTPDDFLNSVDEMDTGDTINQSTLPSQQNRFPDY  
LEAIPGTNVDLGTLEGDGMNIEGEELMPSLQEQALSSDILNDMESVLAATKLDKESFLTWL  
PMRLRKLPSFFKPP

rs:XP\_017388560 [XP\_017388560] PREDICTED: transcriptional coactivator  
YAP1 isoform X5 [Cebus capucinus imitator]. 85..99  
MDPGQQPPPQAAPQGQGGPPAQQPPQGGQPASAPGQPAPAATQAAPQAPPAGHQIVHVRGDSETDLEALF  
NAVMNPKTANVPQTVPMRLRKLPSFFKPPPEPKSHSRQASTDAGTAGALTPQHVRHSSPASLQLGAVSPGTLTP  
TGVVSGPAATPTAQHLRQSSFEIPDDVPLPAGWEMAKTSSGQRYFLNHIDQTTTWQDPRKAMLSQMNVTAPTSPP  
VQQNMMNSASGPLPDGWEQAMTQDGEIYYINHKNKTTSWLDPRLDPRFGKAMNQRISSAPVKQPPPLAPQSPQG  
GVMGGSSSNQQQQMRLQQLQMEKERLRLKQOELLRQVRPQELALRSQLPTLEQDGGTQNPVSSPGMSQELRTMTT  
NSSDPFLNSGTYHSRDESTDSGLSMSSYSVPRTPDDFLNSVDEMDTGDTINQSTLPSQQNRFPDYLEAIPGTNVD  
LGTLEGDGMNIEGEELMPSLQEQALSSDILNDMESVLAATKLDKESFLTWL PMRLRKLPSFFKPP

rs:XP\_017388561 [XP\_017388561] PREDICTED: transcriptional coactivator  
YAP1 isoform X6 [Cebus capucinus imitator]. 85..99  
MDPGQQPPPQAAPQGQGGPPAQQPPQGGQPASAPGQPAPAATQAAPQAPPAGHQIVHVRGDSETDLEALF  
NAVMNPKTANVPQTVPMRLRKLPSFFKPPPEPKSHSRQASTDAGTAGALTPQHVRHSSPASLQLGAVSPGTLTP  
TGVVSGPAATPTAQHLRQSSFEIPDDVPLPAGWEMAKTSSGQRYFLNHIDQTTTWQDPRKAMLSQMNVTAPTSPP  
VQQNMMNSASGPLPDGWEQAMTQDGEIYYINHKNKTTSWLDPRLDPRFAMNQRISSAPVKQPPPLAPQSPQGGV  
MGGSSSNQQQQMRLQQLQMEKERLRLKQOELLRQVRPQELALRSQLPTLEQDGGTQNPVSSPGMSQELRTMTTNS  
SDPFLNSGTYHSRDESTDSGLSMSSYSVPRTPDDFLNSVDEMDTGDTINQSTLPSQQNRFPDYLEAIPGTNVDL  
GTLEGDGMNIEGEELMPSLQEQALSSDILNDMESVLAATKLDKESFLTWL PMRLRKLPSFFKPP

rs:XP\_017388562 [XP\_017388562] PREDICTED: transcriptional coactivator  
YAP1 isoform X7 [Cebus capucinus imitator].>tr:A0A2K5S0Y4\_CEBCA  
[A0A2K5S0Y4] SubName: Full=Uncharacterized protein  
{ECO:0000313|Ensembl:ENSCCAP00000034059}; 85..99  
MDPGQQPPPQAAPQGQGGPPAQQPPQGGQPASAPGQPAPAATQAAPQAPPAGHQIVHVRGDSETDLEALF  
NAVMNPKTANVPQTVPMRLRKLPSFFKPPPEPKSHSRQASTDAGTAGALTPQHVRHSSPASLQLGAVSPGTLTP  
TGVVSGPAATPTAQHLRQSSFEIPDDVPLPAGWEMAKTSSGQRYFLNHIDQTTTWQDPRKAMLSQMNVTAPTSPP  
VQQNMMNSASGPLPDGWEQAMTQDGEIYYINHKNKTTSWLDPRLDPRFGKAMNQRISSAPVKQPPPLAPQSPQGG  
GVMGGSSSNQQQQMRLQQLQMEKERLRLKQOELLRQELALRSQLPTLEQDGGTQNPVSSPGMSQELRTMTTNSSD  
PFLNSGTYHSRDESTDSGLSMSSYSVPRTPDDFLNSVDEMDTGDTINQSTLPSQQNRFPDYLEAIPGTNVDLGT  
LEGDGMNIEGEELMPSLQEQALSSDILNDMESVLAATKLDKESFLTWL PMRLRKLPSFFKPP

rs:XP\_017388563 [XP\_017388563] PREDICTED: transcriptional coactivator  
YAP1 isoform X8 [Cebus capucinus imitator]. 85..99  
MDPGQQPPPQAAPQGQGGPPAQQPPQGGQPASAPGQPAPAATQAAPQAPPAGHQIVHVRGDSETDLEALF  
NAVMNPKTANVPQTVPMRLRKLPSFFKPPPEPKSHSRQASTDAGTAGALTPQHVRHSSPASLQLGAVSPGTLTP  
TGVVSGPAATPTAQHLRQSSFEIPDDVPLPAGWEMAKTSSGQRYFLNHIDQTTTWQDPRKAMLSQMNVTAPTSPP  
VQQNMMNSASGPLPDGWEQAMTQDGEIYYINHKNKTTSWLDPRLDPRFAMNQRISSAPVKQPPPLAPQSPQGGV  
MGGSSSNQQQQMRLQQLQMEKERLRLKQOELLRQELALRSQLPTLEQDGGTQNPVSSPGMSQELRTMTTNSDPF  
LNSGTYHSRDESTDSGLSMSSYSVPRTPDDFLNSVDEMDTGDTINQSTLPSQQNRFPDYLEAIPGTNVDLGT  
LEGDGMNIEGEELMPSLQEQALSSDILNDMESVLAATKLDKESFLTWL PMRLRKLPSFFKPP

rs:XP\_017388564 [XP\_017388564] PREDICTED: transcriptional coactivator  
YAP1 isoform X9 [Cebus capucinus imitator].>tr:A0A2K5S0W3\_CEBCA



[A0A2K5S0W3] SubName: Full=Uncharacterized protein  
{ECO:0000313|Ensembl:ENSCCAP00000034039}; 85..99

MDPGQQPPPQAAPQGGQPPAQQPPQGGQPASAPGQPAPAATQAAPQAPPAGHQIVHVRGDSETDLEALF  
NAVMNPKTANVPQTVPMRLRKLKLPDSFFKPPPEPKSHSRQASTDAGTAGALTPQHVRHSSPASLQLGAVSPGTLTP  
TGVVSGPAATPTAQHLRQSSFEIPDDVPLPAGWEMAKTSSGQRYFLNHIDQTTTWQDPRKAMLSQMNVTAPTSPP  
VQQNMMNSASAMNQRIQSAPVKQPPPLAPQSPQGGVMGGSSSNQQQQMRLQQLQMEKERLRLKQQEELLRQVRPQ  
AMRNINPSTANSKQELALRSQLEPTLEQDGGTQNPVSSPGMSQELRTMTTNSSDPFLNSGTYHSRDESTDSGLS  
MSSYSVPRTPDDFLNSVDEMMDTGDITINQSTLPSQQNRFPDYLEAIPGTNVDLGTLEGDGMNIEGEEELMPSLQEQAL  
SSDILNDMESVLAATKLDKESFLTWL PMRLRKLKLPDSFFKPP

rs:XP\_017388565 [XP\_017388565] PREDICTED: transcriptional coactivator  
YAP1 isoform X10 [Cebus capucinus imitator]. 85..99

MDPGQQPPPQAAPQGGQPPAQQPPQGGQPASAPGQPAPAATQAAPQAPPAGHQIVHVRGDSETDLEALF  
NAVMNPKTANVPQTVPMRLRKLKLPDSFFKPPPEPKSHSRQASTDAGTAGALTPQHVRHSSPASLQLGAVSPGTLTP  
TGVVSGPAATPTAQHLRQSSFEIPDDVPLPAGWEMAKTSSGQRYFLNHIDQTTTWQDPRKAMLSQMNVTAPTSPP  
VQQNMMNSASAMNQRIQSAPVKQPPPLAPQSPQGGVMGGSSSNQQQQMRLQQLQMEKERLRLKQQEELLRQAMRN  
INPSTANSKQELALRSQLEPTLEQDGGTQNPVSSPGMSQELRTMTTNSSDPFLNSGTYHSRDESTDSGLSMSSY  
SVPRTPDDFLNSVDEMMDTGDITINQSTLPSQQNRFPDYLEAIPGTNVDLGTLEGDGMNIEGEEELMPSLQEQALSSDI  
LNDMESVLAATKLDKESFLTWL PMRLRKLKLPDSFFKPP

rs:XP\_017388566 [XP\_017388566] PREDICTED: transcriptional coactivator  
YAP1 isoform X11 [Cebus capucinus imitator]. 85..99

MDPGQQPPPQAAPQGGQPPAQQPPQGGQPASAPGQPAPAATQAAPQAPPAGHQIVHVRGDSETDLEALF  
NAVMNPKTANVPQTVPMRLRKLKLPDSFFKPPPEPKSHSRQASTDAGTAGALTPQHVRHSSPASLQLGAVSPGTLTP  
TGVVSGPAATPTAQHLRQSSFEIPDDVPLPAGWEMAKTSSGQRYFLNHIDQTTTWQDPRKAMLSQMNVTAPTSPP  
VQQNMMNSASAMNQRIQSAPVKQPPPLAPQSPQGGVMGGSSSNQQQQMRLQQLQMEKERLRLKQQEELLRQVRPQ  
ELALRSQLEPTLEQDGGTQNPVSSPGMSQELRTMTTNSSDPFLNSGTYHSRDESTDSGLSMSSYSVPRTPDDFLNS  
VDEMMDTGDITINQSTLPSQQNRFPDYLEAIPGTNVDLGTLEGDGMNIEGEEELMPSLQEQALSSDILNDMESVLAATK  
LDKESFLTWL PMRLRKLKLPDSFFKPP

rs:XP\_017388567 [XP\_017388567] PREDICTED: transcriptional coactivator  
YAP1 isoform X12 [Cebus capucinus imitator]. 85..99

MDPGQQPPPQAAPQGGQPPAQQPPQGGQPASAPGQPAPAATQAAPQAPPAGHQIVHVRGDSETDLEALF  
NAVMNPKTANVPQTVPMRLRKLKLPDSFFKPPPEPKSHSRQASTDAGTAGALTPQHVRHSSPASLQLGAVSPGTLTP  
TGVVSGPAATPTAQHLRQSSFEIPDDVPLPAGWEMAKTSSGQRYFLNHIDQTTTWQDPRKAMLSQMNVTAPTSPP  
VQQNMMNSASAMNQRIQSAPVKQPPPLAPQSPQGGVMGGSSSNQQQQMRLQQLQMEKERLRLKQQEELLRQELAL  
RSQLEPTLEQDGGTQNPVSSPGMSQELRTMTTNSSDPFLNSGTYHSRDESTDSGLSMSSYSVPRTPDDFLNSVDEM  
DTGDITINQSTLPSQQNRFPDYLEAIPGTNVDLGTLEGDGMNIEGEEELMPSLQEQALSSDILNDMESVLAATKLDKE  
SFLTWL PMRLRKLKLPDSFFKPP

rs:XP\_017400427 [XP\_017400427] PREDICTED: protein **FAM181B** [Cebus  
capucinus imitator]. 218..232

MAVQAALLSTHPFVFPFGGGSPDGLGGAFGALDKGCCFEDDETGASAGALLSGAEGDLREATRDLLSF  
IDSASSNIKLALDKPGKSKRKNVHRKYLQKQIKRCSGLMGAAPPSPSAADTPAKRPLAAPGAPTVAAPAHGK  
AAPRREASQATAAASLQSRSLAALFDSLRLHVPGGAEPAGGAVAAPAARLGAGGAGGDAAGHVGGAAVPGARKVPL  
RARNLPPSFFTEPSLAGGGGCGPSGPDVSLGDLEKGAEEVEFFELLEPDYAGATAAAVLLAAEPLDVFAGASVL  
RGPPELEPGLFEPFPAVGNLLYPEPWSVPGCPPTKKPPLTAPRGGLTLNEPLRPLYPAAADSPSGEDGPGHLAS  
FAPFFPDCALPPPPPHQVSVDYSAGYSRTAYSSLWRPDGVWEGAPGEEGAHRD PLRARNLPPSFFTEP

rs:XP\_017402491 [XP\_017402491] PREDICTED: protein **FAM181A** isoform X1  
[Cebus capucinus imitator]. 225..239

MLCIWRGAPDWPEGPPSSGELSSIQPTQGLHNCFQPDGARPAVPGVPVGLQRGTCRATLVGPRPAPLVS  
SVSFPGAASQQQSPSSWKASCGLVMASDSVVKMLLNFNVLASSDIKAALDKSAPCRRSVDHRKYLQKQLKRF  
SQKYSRLPRGLPGRATEPYLKRGPNDQPGRLLLDLGPDSSPGGGGCKEKVLRNPCRREECLAKEQLPQGQHPAEA  
RPGQVPMRKRQLPASFWEEPRTSHYHVGLGGLGREGPPYEAKKNCKGLEPLGPETASVMSPSALAEKESLK  
MPGVSLVGRVNAWSCCPFYHGQPIYPGPLGALPQSPVPSLGLWRKSPTFPGELAYLCKDADGLGQKVCPRMVLK  
PIPTKPAMPPPIFNVFQYL PMRKRQLPASFWEEP

rs:XP\_017402492 [XP\_017402492] PREDICTED: protein **FAM181A** isoform X2  
[Cebus capucinus imitator]. 129..143

MASDSVVKMLLNFNVLASSDIKAALDKSAPCRRSVDHRKYLQKQLKRFSQKYSRLPRGLPGRATEPYLK  
RGPDNQPGRLLLDLGPDSSPGGGGGCKEKVLRNPCREECLAKEQLPQGOHPEAARPGQVPMRKRQLPASFWEEP  
PTHSYHVGLEGLGPREGPPYEAKKNCKGLEPLGPETASVSMSPSALAEKESLKMPGVSLVGRVNAWSCCFQYH  
GQPIYPGPLGALPQSPVPSLGLWRKSPTFFGELAYLCKDADGLGQKVC RPMVLKPIPTKPAMPPPIFNVFGYL  
PMRKRQLPASFWEEP

rs:XP\_017402493 [XP\_017402493] PREDICTED: protein **FAM181A** isoform X3  
[Cebus capucinus imitator]. 374..388

MWRGRSSSAFAHRRALQVQTLLVNAMRSWESNSTSLTSFVRGKRTATLTERPREVFVWSSNTALVAVG  
MCCVSTYNPFSSTFLSPSFLSSFLPPLFPQKVFVGGKRVCKVNYGESFIRHQLTSHGVLPGGEAHYWLKER  
QLHKWAVQNGQAGLQVPWDLEEAGSRAEWLQKILMPLEERRSSRDRKDAAHIECRNLGGKGRAQRKQLLGQVSS  
VSFPGAASQQQSPSSWKASC GGPLVMASDSVVKMLLNFNVLASSDIKAALDKSAPCRRSVDHRKYLQKQLKRFS  
QKYSRLPRGLPGRATEPYLKRGPDNQPGRLLLDLGPDSSPGGGGGCKEKVLRNPCREECLAKEQLPQGOHPEAAR  
PGQVPMRKRQLPASFWEEPPTHSYHVGLEGLGPREGPPYEAKKNCKGLEPLGPETASVSMSPSALAEKESLK  
MPGVSLVGRVNAWSCCFQYH GQPIYPGPLGALPQSPVPSLGLWRKSPTFFGELAYLCKDADGLGQKVC RPMVLK  
PIPTKPAMPPPIFNVFGYL PMRKRQLPASFWEEP

rs:XP\_017563523 [XP\_017563523] PREDICTED: transcriptional coactivator  
YAP1 isoform X1 [Pygocentrus nattereri]. 45..59

MDPSQHNPAGHQIVHVRGDSETDLEALFNAVMPKNAAVPSSVPMRLRKL PDSFFKPPPEPKSHSRQAS  
TDAGTAGTLTPQHVRHSSPASLQLGAVSPGGLTAMTPTGTSPQHLRQPSYEIPDDVPLPPGWEMAKTASGQRYF  
LNHIEQTTTWQDPRKAMLQMN SAAPGSPVPVQQNLLNPATGPLPDGWEQAITSEGEIYYINHKNKTTSWLDPRL  
DPRFETDEARSKDTKTLTQTTFFPHPPKSRARTSAGMLFHTSKGLRRLNQQRISQSAPVKQAAQLPSSPQNTGVMG  
GNSQMRLLOMEKERQRLKHQELLRRPQELALRNQLPTSMEQDGGSQNPVSSPGMGQDARSMTTNSSDPFLNSGTY  
HSRDESTDSGLSMSSYSVPRTPD DFLNSVDEMETS DSDLGPPSMATQPRGFDPYLD AIPGTDVDLGTLEGESMAVE  
GEELMPSLQREALSSDILNDMESVLAATKIDKESFLTWL PMRLRKL PDSFFKPP

rs:XP\_017563524 [XP\_017563524] PREDICTED: transcriptional coactivator  
YAP1 isoform X2 [Pygocentrus nattereri]. 45..59

MDPSQHNPAGHQIVHVRGDSETDLEALFNAVMPKNAAVPSSVPMRLRKL PDSFFKPPPEPKSHSRQAS  
TDAGTAGTLTPQHVRHSSPASLQLGAVSPGGLTAMTPTGTSPQHLRQPSYEIPDDVPLPPGWEMAKTASGQRYF  
LNHIEQTTTWQDPRKAMLQMN SAAPGSPVPVQQNLLNPATGPLPDGWEQAITSEGEIYYINHKNKTTSWLDPRL  
DPRFDEARSKDTKTLTQTTFFPHPPKSRARTSAGMLFHTSKGLRRLNQQRISQSAPVKQAAQLPSSPQNTGVMGN  
SQMRLLOMEKERQRLKHQELLRRPQELALRNQLPTSMEQDGGSQNPVSSPGMGQDARSMTTNSSDPFLNSGTYHSR  
RDESTDSGLSMSSYSVPRTPD DFLNSVDEMETS DSDLGPPSMATQPRGFDPYLD AIPGTDVDLGTLEGESMAVEGE  
ELMPSLQREALSSDILNDMESVLAATKIDKESFLTWL PMRLRKL PDSFFKPP

rs:XP\_017563525 [XP\_017563525] PREDICTED: transcriptional coactivator  
YAP1 isoform X3 [Pygocentrus nattereri].>tr:A0A3B4E9B4\_PYGNA [A0A3B4E9B4]  
SubName: Full=Yes-associated protein 1  
{ECO:0000313|Ensembl:ENSNAP00000031874}; 45..59

MDPSQHNPAGHQIVHVRGDSETDLEALFNAVMPKNAAVPSSVPMRLRKL PDSFFKPPPEPKSHSRQAS  
TDAGTAGTLTPQHVRHSSPASLQLGAVSPGGLTAMTPTGTSPQHLRQPSYEIPDDVPLPPGWEMAKTASGQRYF  
LNHIEQTTTWQDPRKAMLQMN SAAPGSPVPVQQNLLNPATGPLPDGWEQAITSEGEIYYINHKNKTTSWLDPRL  
DPRFETDEARSKDTKTLTQTTFFPHPPKSRARTSAGMLFHTSKALNQQRISQSAPVKQAAQLPSSPQNTGVMGGNS  
QMRLLOMEKERQRLKHQELLRRPQELALRNQLPTSMEQDGGSQNPVSSPGMGQDARSMTTNSSDPFLNSGTYHSR  
DESTDSGLSMSSYSVPRTPD DFLNSVDEMETS DSDLGPPSMATQPRGFDPYLD AIPGTDVDLGTLEGESMAVEGEE  
LMP SLQREALSSDILNDMESVLAATKIDKESFLTWL PMRLRKL PDSFFKPP

rs:XP\_017563526 [XP\_017563526] PREDICTED: transcriptional coactivator  
YAP1 isoform X4 [Pygocentrus nattereri].>tr:A0A3B4E9E1\_PYGNA [A0A3B4E9E1]  
SubName: Full=Yes-associated protein 1  
{ECO:0000313|Ensembl:ENSNAP00000031871}; 45..59

MDPSQHNPAGHQIVHVRGDSETDLEALFNAVMPKNAAVPSSVPMRLRKL PDSFFKPPPEPKSHSRQAS  
TDAGTAGTLTPQHVRHSSPASLQLGAVSPGGLTAMTPTGTSPQHLRQPSYEIPDDVPLPPGWEMAKTASGQRYF  
LNHIEQTTTWQDPRKAMLQMN SAAPGSPVPVQQNLLNPATGPLPDGWEQAITSEGEIYYINHKNKTTSWLDPRL  
DPRFALNQQRISQSAPVKQAAQLPSSPQNTGVMGGNSQMRLLOMEKERQRLKHQELLRRPQELALRNQLPTSMEQ

DGGSQNPVSSPGMGQDARSMTTNSSDPFLNSGTYHSRDESTDSGLSMSSYSVPRTPDDFLNSVDEMETSDSLGP  
SMATQPRGFPDYLDIAIPGTDVLDLGTLEGESMAVEGEELMPSLQEQALSSDILNDMESVLAATKIDKESFLT  
WLPMLRKLKLPDSFFKPP

rs:XP\_008627943 [XP\_008627943] PREDICTED: protein **FAM181A** [Corvus  
brachyrhynchos].>tr:A0A091F2P8\_CORBR [A0A091F2P8] SubName: Full=Protein  
**FAM181A** {ECO:0000313|EMBL:KFO56115.1}; 127..141

MASDSEVKTLNLFVNLASSDIKAALDKSAPCRRSVDHRKYLQKQLKRFSQKYSRIPRCHPSKPPECGWR  
RGAEDRARGPQPEAPDSGPHGGAAAQKVMQTAEAEENLTGERVLQEQKPEAARPDQVPMRKRQLPASFWEEP  
RPAQSLTGRAFPASPEGFQAPRDPYEGKSKSRSPDAAGQESPPDPAPHAGEKDPAGALSGRVGAWTCCPFP  
CPGPGVYQPPGALPPSPFPGLGLWRKSAAALPAEVPHFCKEADGPGQKLYRPMVLKPIPTKPAIPPIFN  
VFGYLPMRKRQLPASFWEEP

rs:XP\_017596717 [XP\_017596717] PREDICTED: uncharacterized protein  
LOC108448429 [Corvus brachyrhynchos]. 171..185

MAAGVIQPLAELRLPSPFPHGLLLPHTPEPDPFDVSEEEEEEEEEEEEEEEEEVEAVEESVRPELAGVSS  
TAETTLRLLLKFSSELISCDIQRYFGRRGREEAPSSRPVPEDCGSPQSTEAVPEAVVPRRSPGATHMLG  
PLAELFEYGVHRCLPARVAGSKTQRLERKYGHITPMHHRKLPSPFWKEPGPGPASLLHAGTPDFSDLLAN  
WTVPEPPELPGTRELPGRLGLEAEPFAGLPMHHRKLPSPFWKEP

rs:XP\_017789666 [XP\_017789666] PREDICTED: transcriptional coactivator  
YAP1 [Habropoda laboriosa]. 46..60

MALNQDQDQLSKSNLVVRIDQNSESDLQALFDSVLKPDSCRPLQVPLMRNLPSFFNPPSTGSKSPSI  
SHSRENSADSAFGTAXXXXXXXXXXAHPRAHSSPASLQQTYASAQAPQHAPQPHARHHHHQKQRSYDVIST  
VDDLGPLPHGWEQARTPEGQIYFLNHLTRTTTWEDPRKTAATAANVAAVAAAVDNGKSSTGATNSLGL  
PLPDGWEQARTPEGQIYFINHQTRTTSWFDPRIPHTLQRAPTSGAMLPQNLWQQQPTGGGIQSNQTLQAC  
QKLRQLQSLQMERERLQQRQEIIMRQQLMLRQSTTDAAMPFLSGINEQHARQESADSLGLGSAYS  
LPHTPEDFLANIDNDMGTSDDGGAPMETPDLSTLSDNIDSTDDLVPSSLQLEDFSSDILDDVQSLIN  
PNTTKPENVTWLP LMRNLPSFFNPP

rs:NP\_001180963 [NP\_001180963] protein **FAM181B** [Macaca  
mulatta].>tr:F7A8C3\_MACMU [F7A8C3] SubName: Full=Family with sequence  
similarity 181 member B {ECO:0000313|Ensembl:ENSMMUP00000036810};  
221..235

MAVQAALLSTHPFVFPFGGGSPDGLGGAFGALDKGCCFEDDETGAPAGALLSGAEGGDVREATRDLLSF  
IDSASSNIKLALDKPGKSKRKNHRKYLQKQIKRCSGLMGAVPPGPPSPSATDTPAKRPLAAPSAPTVA  
PAHKGAVPREASQAAAAASLQSRSLAALFDSLHRVPGGAEPAGGAVAAVAVAGLGGAGTGGAGGDAAG  
PAGATAVPGARKVPLRARNLPPSFFTEPSRAGGGCGSPGPDVSLGDLEKGAEEVEFFELLGPDYGA  
GTEAAVLLAAEPLDVFPAGASVLRGPPELESGLFDPAPAVVGNLLYPEPWSVPGCPPTKKPPLTAP  
RGGLTLNEPLRPLYPAAADSPPGGEDGPGHLASFSPFFPCALPPPPPPHQVSYDYSAGYSR  
NAYSSLWRPDAVWEGAPGEEGAHRDPLRARNLPPSFFTEP

rs:XP\_017835831 [XP\_017835831] PREDICTED: transcriptional coactivator  
yorkie isoform X1 [Drosophila busckii]. 62..76

MSLSNKSNGINDKEIDDEDMLSPTKLSTNLVVRVNVQSDDDLQALFDSVLNPGDAKLPLQLPFRMRKLP  
NSFFNPPAPLHSRANSADSTYDGSQTNINKTAQVSPSEIQSSISQNPQSQRSLQIHHFRARSSPASL  
QQNYTVRSRNEPSANTSQAPGPAYPDNGVDFNSSGVAASNIDVDAMNTCMAQQQEAAVAAAALSTQTS  
IHKKQRSYDVVSPILQIQLGALPPGWEQAKTNDGQIYYLNHTTKTTQWEDPRIQFRQQQQRVIAER  
IKPNDILQTTKQTNAPTIGSQMGPLPEGWEQAVTESGDIYFINHIDRTTSWNDPRTQSGLSGLDCPD  
NIVSTLQIGDNICNNIFNDAQNIITPSSQKPADLEWYKINPFRMRKLPNSFFNPP

rs:XP\_017835832 [XP\_017835832] PREDICTED: transcriptional coactivator  
yorkie isoform X2 [Drosophila busckii].>tr:A0A0M4EIM3\_DROBS [A0A0M4EIM3]  
SubName: Full=Yki {ECO:0000313|EMBL:ALC42660.1};>gp:CP012524\_2239  
[CP012524] yki [Drosophila busckii] 62..76

MSLSNKSNGINDKEIDDEDMLSPTKLSTNLVVRVNVQSDDDLQALFDSVLNPGDAKLPLQLPFRMRKLP  
NSFFNPPAPLHSRANSADSTYDGSQTNINKTAQVSPSEIQSSISQNPQSQRSLQIHHFRARSSPASL  
QQNYTVRSRNEPSANTSQAPGPAYPDNGVDFNSSGVAASNIDVDAMNTCMAQQQEAAVAAAALSTQTS  
IHKKQRSYDVVSPILQIQLGALPPGWEQAKTNDGQIYYLNHTTKTTQWEDPRIQFRQQQQRVIAER  
IKPNESGLSGLDCPDNIVSTLQIGDNICNNIFNDAQNIITPSSQKPADLEWYKINPFRMRKLPNSFFNPP

rs:XP\_017835834 [XP\_017835834] PREDICTED: transcriptional coactivator  
yorkie isoform X3 [Drosophila busckii]. 62..76

MSLSNKSNGNINDKEIDDEDMLSPTKLSTNLVVRVNQSDDDLQALFDSVLNPGDAKLPLQLPFRMRKLP  
NSFFNPPAPLHSRANSADSTYDGSQTNINKTAQVSPSEIQSSISQNPQSRLQIHHFRARSSPASLQQNYTVRS  
RNEPSANTSQAPGPAYPDNGVDFNSSGVAASNIDVDAMNTCMAQQQEAAVAAAALSTQTSIHKKQRSYDVVSPIQ  
LQIQLGALPPGWQAKTNDGQIYYLNHTTKTTQWEDPRIQFRQQQQRVAERIAKPNVLTDTYKKMKA  
PFRMRKLPNSFFNPP

rs:XP\_017835835 [XP\_017835835] PREDICTED: transcriptional coactivator  
yorkie isoform X4 [Drosophila busckii]. 62..76

MSLSNKSNGNINDKEIDDEDMLSPTKLSTNLVVRVNQSDDDLQALFDSVLNPGDAKLPLQLPFRMRKLP  
NSFFNPPAPLHSRANSADSTYDGSQTNINKTAQVSPSEIQSSISQNPQSRLQIHHFRARSSPASLQQNYTVRS  
RNEPSANTSQAPGPAYPDNGVDFNSSGVAASNIDVDAMNTCMAQQQEAAVAAAALSTQTSIHKKQRSYDVVSPIQ  
LQIQLGALPPGWQAKTNDGQIYYLNHTTKTTQWEDPRIQFRQQQQRVAERIAKPNVLPILS  
PFRMRKLPNSFFNPP

rs:XP\_017866532 [XP\_017866532] PREDICTED: transcriptional coactivator  
yorkie isoform X1 [Drosophila arizonae]. 61..75

MSLSNKSNISEKEIDDEDMLSPTKISTNLVVRVNQSDDDLQALFDSVLNPGDAKLPLQLPFRMRKLPN  
SFFNPPAPLHSRANSADSTYDGSQTNINKTAQPEMQPSLTQQNPQSHSRLAIHHRARSSPASLQQNYNVRTRNE  
PSANNANTNQGAPYAPETSVDVFSASTANNIDLVDVINTCMGVPVPGDAAALAATQTTIHKKQRSYDVVSPIQ  
LQIQLGALPPGWQAKTNDGQIYYLNHTSKTTQWEDPRIQFRQQQQRALAERIAKPNVDVIQTTKPTSSSTIATHLGLPLD  
GWEQAVTESGDIYFINHIDRTTSSWNPRIQSGNLVLDLCPDNLVSSLQIGDNICSNIFNDTQAIINTPSSHKPDDL  
EWYKIN PFRMRKLPNSFFNPP

rs:XP\_017866533 [XP\_017866533] PREDICTED: transcriptional coactivator  
yorkie isoform X2 [Drosophila arizonae]. 61..75

MSLSNKSNISEKEIDDEDMLSPTKISTNLVVRVNQSDDDLQALFDSVLNPGDAKLPLQLPFRMRKLPN  
SFFNPPAPLHSRANSADSTYDGSQTNINKTAQPEMQPSLTQQNPQSHSRLAIHHRARSSPASLQQNYNVRTRNE  
PSANNANTNQGAPYAPETSVDVFSASTANNIDLVDVINTCMGVPVPGDAAALAATQTTIHKKQRSYDVVSPIQ  
LQIQLGALPPGWQAKTNDGQIYYLNHTSKTTQWEDPRIQFRQQQQRALAERIAKPNESGLNVLDLCPDNLVSSLQIGDNI  
CSNIFNDTQAIINTPSSHKPDDLEWYKIN PFRMRKLPNSFFNPP

rs:XP\_009005426 [XP\_009005426] PREDICTED: transcriptional coactivator  
YAP1 isoform X1 [Callithrix jacchus]. 84..98

MDPGQQPPPQAAPQGGQPPAQPQGGPSSAPGQPAPAATQAASQAPPAGHQIVHVRGDSETDLEALFN  
AVMNPKTANVPQTVPMRLRKLKLPDSFFKPPPEPKSHSRQASTDAGTAGALTPQHVRASHPASLQLGAVSPGTLTPT  
GVVSGPAATPTAQHLRQSSFEIPDDVPLPAGWEMAKTSSGQRYFLNHIDQTTTWQDPRKAMLSQMNVTAPTSPV  
QQNMMNSASGPLPDGWEQAMTQDGEIYYINHKNKTTSWLDPRLDPRFGKAMNQRISQSAPVKQPPPLAPQSPQGG  
VMGGSSSNQQQMRLLQQLQMEKERLRLKQELLRQVRPQAMRNINPSTANSPKCQELALRSQLPQDGGTQNP  
VSSPGMSQELRTMTTSSDPFLNSGTYHSRDESTDSGLSMSSYSVPRTPDFFLNSVDEMDTGDTINQSTLPSQQN  
RFPDYLEAIPGTNVDLGTLEGDMNIEGELMPSLQEQALSSDILNDMESVLAATKLDKESFLTWL  
PMRLRKLKLPDSFFKPP

rs:XP\_009005427 [XP\_009005427] PREDICTED: transcriptional coactivator  
YAP1 isoform X2 [Callithrix jacchus].>tr:F6W3S6\_CALJA [F6W3S6] SubName:  
Full=Yes associated protein 1 {ECO:0000313|Ensembl:ENSCJAP00000001114};  
SubName: Full=Yorkie homolog isoform 1 {ECO:0000313|EMBL:JAB10536.1};  
84..98

MDPGQQPPPQAAPQGGQPPAQPQGGPSSAPGQPAPAATQAASQAPPAGHQIVHVRGDSETDLEALFN  
AVMNPKTANVPQTVPMRLRKLKLPDSFFKPPPEPKSHSRQASTDAGTAGALTPQHVRASHPASLQLGAVSPGTLTPT  
GVVSGPAATPTAQHLRQSSFEIPDDVPLPAGWEMAKTSSGQRYFLNHIDQTTTWQDPRKAMLSQMNVTAPTSPV  
QQNMMNSASGPLPDGWEQAMTQDGEIYYINHKNKTTSWLDPRLDPRFAMNQRISQSAPVKQPPPLAPQSPQGGVM  
GGSSSNQQQMRLLQQLQMEKERLRLKQELLRQVRPQAMRNINPSTANSPKCQELALRSQLPQDGGTQNPVS  
SPGMSQELRTMTTSSDPFLNSGTYHSRDESTDSGLSMSSYSVPRTPDFFLNSVDEMDTGDTINQSTLPSQQNRF  
PDYLEAIPGTNVDLGTLEGDMNIEGELMPSLQEQALSSDILNDMESVLAATKLDKESFLTWL  
PMRLRKLKLPDSFFKPP

rs:XP\_009005428 [XP\_009005428] PREDICTED: transcriptional coactivator  
YAP1 isoform X3 [Callithrix jacchus].>tr:U3DLA3\_CALJA [U3DLA3] SubName:  
Full=Yorkie homolog isoform 1 {ECO:0000313|EMBL:JAB10535.1}; 84..98  
MDPGQQPPPQAAPQGGQPPAQPQGGQGPSSAPGQPAPAATQAASQAPPAGHQIVHVRGDSETDLEALFN  
AVMNPKTANVPQTVPMRLRKLKLPDSFFKPPPEPKSHSRQASTDAGTAGALTPQHVRHSSPASLQLGAVSPGTLTPT  
GVVSGPAATPTAQHLRQSSFEIPDDVPLPAGWEMAKTSSGQRYFLNHIDQTTTWQDPRKAMLSQMNVTAPTSPPV  
QQNMNSASGPLPDGWEQAMTQDGEIYYINHKNKTTSWLDPRLDPRFGKAMNQRISQSAPVKQPPPLAPQSPQGG  
VMGGSSSNQQQQMRLQQLQMEKERLRLKQOELLRQAMRNINPSTANSPKCQELALRSQLPTLEQDGGTQNPVSSP  
GMSQELRTMTTNSDDPFLNSGTYHSRDESTDSGLSMSSYSVPRTPDFFLNSVDEMDTGDTINQSTLPSQQNRFPD  
YLEAIPGTNVDLGTLEGDGMNIEGEEELMPSLQEQALSSDILNDMESVLAATKLDKESFLTWL  
PMRLRKLKLPDSFFKPP

rs:XP\_002754685 [XP\_002754685] PREDICTED: transcriptional coactivator  
YAP1 isoform X4 [Callithrix jacchus].>tr:F6W3W8\_CALJA [F6W3W8] SubName:  
Full=Yorkie homolog isoform 1 {ECO:0000313|EMBL:JAB10538.1}; 84..98  
MDPGQQPPPQAAPQGGQPPAQPQGGQGPSSAPGQPAPAATQAASQAPPAGHQIVHVRGDSETDLEALFN  
AVMNPKTANVPQTVPMRLRKLKLPDSFFKPPPEPKSHSRQASTDAGTAGALTPQHVRHSSPASLQLGAVSPGTLTPT  
GVVSGPAATPTAQHLRQSSFEIPDDVPLPAGWEMAKTSSGQRYFLNHIDQTTTWQDPRKAMLSQMNVTAPTSPPV  
QQNMNSASGPLPDGWEQAMTQDGEIYYINHKNKTTSWLDPRLDPRFAMNQRISQSAPVKQPPPLAPQSPQGGVM  
GGSSSNQQQQMRLQQLQMEKERLRLKQOELLRQAMRNINPSTANSPKCQELALRSQLPTLEQDGGTQNPVSSPGM  
SQELRTMTTNSDDPFLNSGTYHSRDESTDSGLSMSSYSVPRTPDFFLNSVDEMDTGDTINQSTLPSQQNRFPDYL  
EAIPGTNVDLGTLEGDGMNIEGEEELMPSLQEQALSSDILNDMESVLAATKLDKESFLTWL  
PMRLRKLKLPDSFFKPP

rs:XP\_009005429 [XP\_009005429] PREDICTED: transcriptional coactivator  
YAP1 isoform X5 [Callithrix jacchus]. 84..98  
MDPGQQPPPQAAPQGGQPPAQPQGGQGPSSAPGQPAPAATQAASQAPPAGHQIVHVRGDSETDLEALFN  
AVMNPKTANVPQTVPMRLRKLKLPDSFFKPPPEPKSHSRQASTDAGTAGALTPQHVRHSSPASLQLGAVSPGTLTPT  
GVVSGPAATPTAQHLRQSSFEIPDDVPLPAGWEMAKTSSGQRYFLNHIDQTTTWQDPRKAMLSQMNVTAPTSPPV  
QQNMNSASGPLPDGWEQAMTQDGEIYYINHKNKTTSWLDPRLDPRFGKAMNQRISQSAPVKQPPPLAPQSPQGG  
VMGGSSSNQQQQMRLQQLQMEKERLRLKQOELLRQVRPQELALRSQLPTLEQDGGTQNPVSSPGMSQELRTMTTN  
SSDPFLNSGTYHSRDESTDSGLSMSSYSVPRTPDFFLNSVDEMDTGDTINQSTLPSQQNRFPDYLEAIPGTNVDL  
GTLEGDGMNIEGEEELMPSLQEQALSSDILNDMESVLAATKLDKESFLTWL PMRLRKLKLPDSFFKPP

rs:XP\_009005430 [XP\_009005430] PREDICTED: transcriptional coactivator  
YAP1 isoform X6 [Callithrix jacchus].>tr:F6W445\_CALJA [F6W445] SubName:  
Full=Yes associated protein 1 {ECO:0000313|Ensembl:ENSCJAP00000001100};  
SubName: Full=Yorkie homolog isoform 3 {ECO:0000313|EMBL:JAB10537.1};  
84..98  
MDPGQQPPPQAAPQGGQPPAQPQGGQGPSSAPGQPAPAATQAASQAPPAGHQIVHVRGDSETDLEALFN  
AVMNPKTANVPQTVPMRLRKLKLPDSFFKPPPEPKSHSRQASTDAGTAGALTPQHVRHSSPASLQLGAVSPGTLTPT  
GVVSGPAATPTAQHLRQSSFEIPDDVPLPAGWEMAKTSSGQRYFLNHIDQTTTWQDPRKAMLSQMNVTAPTSPPV  
QQNMNSASGPLPDGWEQAMTQDGEIYYINHKNKTTSWLDPRLDPRFAMNQRISQSAPVKQPPPLAPQSPQGGVM  
GGSSSNQQQQMRLQQLQMEKERLRLKQOELLRQVRPQELALRSQLPTLEQDGGTQNPVSSPGMSQELRTMTTNS  
DPFLNSGTYHSRDESTDSGLSMSSYSVPRTPDFFLNSVDEMDTGDTINQSTLPSQQNRFPDYLEAIPGTNVDLGT  
LEGDGMNIEGEEELMPSLQEQALSSDILNDMESVLAATKLDKESFLTWL PMRLRKLKLPDSFFKPP

rs:XP\_009005431 [XP\_009005431] PREDICTED: transcriptional coactivator  
YAP1 isoform X7 [Callithrix jacchus].>tr:U3FID6\_CALJA [U3FID6] SubName:  
Full=Yorkie homolog isoform 3 {ECO:0000313|EMBL:JAB38540.1}; 84..98  
MDPGQQPPPQAAPQGGQPPAQPQGGQGPSSAPGQPAPAATQAASQAPPAGHQIVHVRGDSETDLEALFN  
AVMNPKTANVPQTVPMRLRKLKLPDSFFKPPPEPKSHSRQASTDAGTAGALTPQHVRHSSPASLQLGAVSPGTLTPT  
GVVSGPAATPTAQHLRQSSFEIPDDVPLPAGWEMAKTSSGQRYFLNHIDQTTTWQDPRKAMLSQMNVTAPTSPPV  
QQNMNSASGPLPDGWEQAMTQDGEIYYINHKNKTTSWLDPRLDPRFGKAMNQRISQSAPVKQPPPLAPQSPQGG  
VMGGSSSNQQQQMRLQQLQMEKERLRLKQOELLRQELALRSQLPTLEQDGGTQNPVSSPGMSQELRTMTTNSDDP  
FLNSGTYHSRDESTDSGLSMSSYSVPRTPDFFLNSVDEMDTGDTINQSTLPSQQNRFPDYLEAIPGTNVDLGTLE  
GDGMNIEGEEELMPSLQEQALSSDILNDMESVLAATKLDKESFLTWL PMRLRKLKLPDSFFKPP

rs:XP\_002754686 [XP\_002754686] PREDICTED: transcriptional coactivator  
YAP1 isoform X8 [Callithrix jacchus].>tr:U3EDT0\_CALJA [U3EDT0] SubName:  
Full=Yorkie homolog isoform 3 {ECO:0000313|EMBL:JAB23746.1}; 84..98  
MDPGQQPPPQAAPQGGQPPAQPQGGQPSSAPGQPAPAATQAASQAPPAGHQIVHVRGDSETDLEALFN  
AVMNPKTANVPQTVPMRLRKLKLPDSFFKPPPEPKSHSRQASTDAGTAGALTPQHVRHSSPASLQLGAVSPGTLTPT  
GVVSGPAATPTAQHLRQSSFEIPDDVPLPAGWEMAKTSSGQRYFLNHIDQTTTWQDPRKAMLSQMNVTAPTSPPV  
QQNMNNSASGPLPDGWEQAMTQDGEIYYINHKNKTTSWLDRPDRPFAMNQRISQSAPVKQPPPLAPQSPQGGVM  
GGSSSNQQQQMRLQQLQMEKERLRLKQQEELLRQELALRSQLPTLEQDGGTQNPVSSPGMSQELRTMTTNSDPFL  
NSGTYHSRDESTDSGLSMSSYSVPRTPDDDLNSVDEMDTGDTINQSTLPSQQNRFPDYLEAIPGTNVDLGTLEGD  
GMNIEGEELMPSLQEQALSSDILNDMESVLAATKLDKESFLTWL PMRLRKLKLPDSFFKPP

rs:XP\_009005432 [XP\_009005432] PREDICTED: transcriptional coactivator  
YAP1 isoform X9 [Callithrix jacchus].>tr:F6WZY5\_CALJA [F6WZY5] SubName:  
Full=Yes associated protein 1 {ECO:0000313|Ensembl:ENSCJAP00000046343};  
84..98  
MDPGQQPPPQAAPQGGQPPAQPQGGQPSSAPGQPAPAATQAASQAPPAGHQIVHVRGDSETDLEALFN  
AVMNPKTANVPQTVPMRLRKLKLPDSFFKPPPEPKSHSRQASTDAGTAGALTPQHVRHSSPASLQLGAVSPGTLTPT  
GVVSGPAATPTAQHLRQSSFEIPDDVPLPAGWEMAKTSSGQRYFLNHIDQTTTWQDPRKAMLSQMNVTAPTSPPV  
QQNMNNSASAMNQRISQSAPVKQPPPLAPQSPQGGVMGGSSSNQQQQMRLQQLQMEKERLRLKQQEELLRQVRPQA  
MRNINPSTANSPKCQELALRSQLPTLEQDGGTQNPVSSPGMSQELRTMTTNSDPFLNSGTYHSRDESTDSGLSM  
SSYSVPRTPDDDLNSVDEMDTGDTINQSTLPSQQNRFPDYLEAIPGTNVDLGTLEGDGMNIEGEELMPSLQEQALS  
SDILNDMESVLAATKLDKESFLTWL PMRLRKLKLPDSFFKPP

rs:XP\_003734188 [XP\_003734188] PREDICTED: transcriptional coactivator  
YAP1 isoform X10 [Callithrix jacchus]. 84..98  
MDPGQQPPPQAAPQGGQPPAQPQGGQPSSAPGQPAPAATQAASQAPPAGHQIVHVRGDSETDLEALFN  
AVMNPKTANVPQTVPMRLRKLKLPDSFFKPPPEPKSHSRQASTDAGTAGALTPQHVRHSSPASLQLGAVSPGTLTPT  
GVVSGPAATPTAQHLRQSSFEIPDDVPLPAGWEMAKTSSGQRYFLNHIDQTTTWQDPRKAMLSQMNVTAPTSPPV  
QQNMNNSASAMNQRISQSAPVKQPPPLAPQSPQGGVMGGSSSNQQQQMRLQQLQMEKERLRLKQQEELLRQAMRNI  
NPSTANSPKCQELALRSQLPTLEQDGGTQNPVSSPGMSQELRTMTTNSDPFLNSGTYHSRDESTDSGLSMSSYS  
VPRTPDDDLNSVDEMDTGDTINQSTLPSQQNRFPDYLEAIPGTNVDLGTLEGDGMNIEGEELMPSLQEQALSSDIL  
NDMESVLAATKLDKESFLTWL PMRLRKLKLPDSFFKPP

rs:XP\_009005433 [XP\_009005433] PREDICTED: transcriptional coactivator  
YAP1 isoform X11 [Callithrix jacchus]. 84..98  
MDPGQQPPPQAAPQGGQPPAQPQGGQPSSAPGQPAPAATQAASQAPPAGHQIVHVRGDSETDLEALFN  
AVMNPKTANVPQTVPMRLRKLKLPDSFFKPPPEPKSHSRQASTDAGTAGALTPQHVRHSSPASLQLGAVSPGTLTPT  
GVVSGPAATPTAQHLRQSSFEIPDDVPLPAGWEMAKTSSGQRYFLNHIDQTTTWQDPRKAMLSQMNVTAPTSPPV  
QQNMNNSASAMNQRISQSAPVKQPPPLAPQSPQGGVMGGSSSNQQQQMRLQQLQMEKERLRLKQQEELLRQVRPQE  
LALRSQLPTLEQDGGTQNPVSSPGMSQELRTMTTNSDPFLNSGTYHSRDESTDSGLSMSSYSVPRTPDDDLNSV  
DEMDTGDTINQSTLPSQQNRFPDYLEAIPGTNVDLGTLEGDGMNIEGEELMPSLQEQALSSDILNDMESVLAATKL  
DKESFLTWL PMRLRKLKLPDSFFKPP

rs:XP\_009005434 [XP\_009005434] PREDICTED: transcriptional coactivator  
YAP1 isoform X12 [Callithrix jacchus].>tr:U3DIQ5\_CALJA [U3DIQ5] SubName:  
Full=Yorkie homolog isoform 2 {ECO:0000313|EMBL:JAB38538.1}; 84..98  
MDPGQQPPPQAAPQGGQPPAQPQGGQPSSAPGQPAPAATQAASQAPPAGHQIVHVRGDSETDLEALFN  
AVMNPKTANVPQTVPMRLRKLKLPDSFFKPPPEPKSHSRQASTDAGTAGALTPQHVRHSSPASLQLGAVSPGTLTPT  
GVVSGPAATPTAQHLRQSSFEIPDDVPLPAGWEMAKTSSGQRYFLNHIDQTTTWQDPRKAMLSQMNVTAPTSPPV  
QQNMNNSASAMNQRISQSAPVKQPPPLAPQSPQGGVMGGSSSNQQQQMRLQQLQMEKERLRLKQQEELLRQELALR  
SQLPTLEQDGGTQNPVSSPGMSQELRTMTTNSDPFLNSGTYHSRDESTDSGLSMSSYSVPRTPDDDLNSVDEMD  
TGDTINQSTLPSQQNRFPDYLEAIPGTNVDLGTLEGDGMNIEGEELMPSLQEQALSSDILNDMESVLAATKLDKES  
FLTWL PMRLRKLKLPDSFFKPP

rs:XP\_002754796 [XP\_002754796] PREDICTED: protein **FAM181B** [Callithrix  
jacchus].>tr:F6V7Z5\_CALJA [F6V7Z5] SubName: Full=Family with sequence  
similarity 181 member B {ECO:0000313|Ensembl:ENSCJAP00000042161}; SubName:  
Full=Protein **FAM181B** {ECO:0000313|EMBL:JAB05080.1}; 218..232  
MAVQAALLSTHPFVPGFGGSADGLGGAFGALDKGCCFEDDETGMPPAGALLSGAEGGDVREATRDLLSF

IDSASSNIKLALDKPGKSKRKVNHRKYLQKQIKRCSGLMGAAAPGPPSPSAADTPAKRPLAAPGAPTVAAPAHSK  
AAPRREASQAAAAASLQSRSLAALFDSLRLHVPVGGAEPAAGAVVTAAAGLGAGGAGGDAAGLAGGAAPVGAKKVPL  
RARNLPPSFFTEPSRAGGGCGSPGPDVSLGDLKGAEEVEFFELLGPDYAGGTEAAVLLAAEPLDVFTGASVLR  
GPPELEPGLFEPVAVVGNLLYEPVSWVPGCPPTKKPPLTVPRGGLTLNEPLRPLYPAAADSPPGGEDGPGHLASF  
APFFPDCALPPPPPHQVVPYDYSAGYSRTAYSSSLWRPDGVWEGEPGEEGAHRDPLRARNLPPSFFTEP

rs:XP\_018020788 [XP\_018020788] PREDICTED: transcriptional coactivator  
YAP1-like isoform X1 [Hyalella azteca]. 50..64

METSEHEDKVVGEPPQKGSVHVHVRADSDSELQALFDCVLKPSKQMPLOKPFKMRNLPAFFKPPTHRQS  
PAPTVTHSRESSADSTYGGGGGGGPIRVGGAMSPAAAPLPPAPQHFRHHSSPASLQQTFAVAQQTNIIGGHAKQHS  
YDALAEDMSPLPPGWEQARTPQGQIYYLNCHSSGYRRHITQTTTWDPRKKVQANPSQTNANQQQPAPQQQQQQQ  
QQPQPAPTTVQSNPVAVQQTQNNVVQLTTPSLPAQNPAQPNPAQHLGALNTNGTALTNP LLNTDLLGPLEGWEQ  
AITADGEIYYINHQEKATSWFDPRIIPRRYQTAQLQKTPLAHQHSPIASPNSQLQQLVGGMMGPRSPSTQHLPRLP  
LDNNRLKNRPNPSPDARKKLRHLRRHEDVIWVNQAPSTLVST SINNAINNNVNLNTTNSTTLLQLQQQLTHNQLQQ  
QQMSNQQAQQQQQQQLQQQQEQQLQQQMLRAAVGGGDPFLLSTLPPADLHARQESADSGLGGLGGNGGAHNGSTPGS  
AHSYTPHQTPPTPEDFLAAMEDVEITPSENRRRVVNSPAPPMMEANDLESMDSEDLVPSINIPCELSSDFLSEVI  
GSNRMDNTWL PFKMRNLPAFFKPP

rs:XP\_018020789 [XP\_018020789] PREDICTED: transcriptional coactivator  
YAP1-like isoform X2 [Hyalella azteca]. 50..64

METSEHEDKVVGEPPQKGSVHVHVRADSDSELQALFDCVLKPSKQMPLOKPFKMRNLPAFFKPPTHRQS  
PAPTVTHSRESSADSTYGGGGGGGPIRVGGAMSPAAAPLPPAPQHFRHHSSPASLQQTFAVAQQTNIIGGHAKQHS  
YDALAEDMSPLPPGWEQARTPQGQIYYLNHITQTTTWDPRKKVQANPSQTNANQQQPAPQQQQQQQQQPAPPT  
TVQSNPVAVQQTQNNVVQLTTPSLPAQNPAQPNPAQHLGALNTNGTALTNP LLNTDLLGPLEGWEQAITADGEI  
YYINHQEKATSWFDPRIIPRRYQTAQLQKTPLAHQHSPIASPNSQLQQLVGGMMGPRSPSTQHLPRLPDNNRLKN  
RPNPSPDARKKLRHLRRHEDVIWVNQAPSTLVST SINNAINNNVNLNTTNSTTLLQLQQQLTHNQLQQQQMSNQQA  
QQQQQQQLQQQQEQQLQQQMLRAAVGGGDPFLLSTLPPADLHARQESADSGLGGLGGNGGAHNGSTPGSAHSYTPHQ  
TPTTTPEDFLAAMEDVEITPSENRRARVAGVVNSPAPPMMEANDLESMDSEDLVPSINIPCELSSDFLSEVIGSNR  
MDNTWL PFKMRNLPAFFKPP

rs:XP\_018020790 [XP\_018020790] PREDICTED: transcriptional coactivator  
YAP1-like isoform X3 [Hyalella azteca]. 50..64

METSEHEDKVVGEPPQKGSVHVHVRADSDSELQALFDCVLKPSKQMPLOKPFKMRNLPAFFKPPTHRQS  
PAPTVTHSRESSADSTYGGGGGGGPIRVGGAMSPAAAPLPPAPQHFRHHSSPASLQQTFAVAQQTNIIGGHAKQHS  
YDALAEDMSPLPPGWEQARTPQGQIYYLNCHSSGYRRHITQTTTWDPRKKVQANPSQTNANQQQPAPQQQQQQQ  
QQPQPAPTTVQSNPVAVQQTQNNVVQLTTPSLPAQNPAQPNPAQHLGALNTNGTALTNP LLNTDLLGPLEGWEQ  
AITADGEIYYINHQEKATSWFDPRIIPRRYQTAQLQKTPLAHQHSPIASPNSQLQQLVGGMMGPRSPSTQHLPRLP  
LDNNRLKNRPNPSPDARKKVNQAPSTLVST SINNAINNNVNLNTTNSTTLLQLQQQLTHNQLQQQQMSNQQAQQQQ  
QQQLQQQQEQQLQQQMLRAAVGGGDPFLLSTLPPADLHARQESADSGLGGLGGNGGAHNGSTPGSAHSYTPHQTPPT  
PEDFLAAMEDVEITPSENRRARVAGVVNSPAPPMMEANDLESMDSEDLVPSINIPCELSSDFLSEVIGSNRMDNT  
WL PFKMRNLPAFFKPP

rs:XP\_018020791 [XP\_018020791] PREDICTED: transcriptional coactivator  
YAP1-like isoform X4 [Hyalella azteca]. 50..64

METSEHEDKVVGEPPQKGSVHVHVRADSDSELQALFDCVLKPSKQMPLOKPFKMRNLPAFFKPPTHRQS  
PAPTVTHSRESSADSTYGGGGGGGPIRVGGAMSPAAAPLPPAPQHFRHHSSPASLQQTFAVAQQTNIIGGHAKQHS  
YDALAEDMSPLPPGWEQARTPQGQIYYLNCHSSGYRRHITQTTTWDPRKKVQANPSQTNANQQQPAPQQQQQQQ  
QQPQPAPTTVQSNPVAVQQTQNNVVQLTTPSLPAQNPAQPNPAQHLGALNTNGTALTNP LLNTDLLGPLEGWEQ  
AITADGEIYYINHQEKATSWFDPRIIPRRYQTAQLQKTPLAHQHSPIASPNSQLQQLVGGMMGPRSPSTQHLPRLP  
LDNNRLKNRPNPSPDARKKLRHLRRHEDVIWESADSGLGGLGGNGGAHNGSTPGSAHSYTPHQTPPTPEDFLAAMED  
VEITPSENRRARVAGVVNSPAPPMMEANDLESMDSEDLVPSINIPCELSSDFLSEVIGSNRMDNTWL  
PFKMRNLPAFFKPP

rs:XP\_018020792 [XP\_018020792] PREDICTED: transcriptional coactivator  
YAP1-like isoform X5 [Hyalella azteca]. 50..64

METSEHEDKVVGEPPQKGSVHVHVRADSDSELQALFDCVLKPSKQMPLOKPFKMRNLPAFFKPPTHRQS  
PAPTVTHSRESSADSTYGGGGGGGPIRVGGAMSPAAAPLPPAPQHFRHHSSPASLQQTFAVAQQTNIIGGHAKQHS  
YDALAEDMSPLPPGWEQARTPQGQIYYLNCHSSGYRRHITQTTTWDPRKKVQANPSQTNANQQQPAPQQQQQQQ  
QQPQPAPTTVQSNPVAVQQTQNNVVQLTTPSLPAQNPAQPNPAQHLGALNTNGTALTNP LLNTDLLGPLEGWEQ

AITADGEIYYINHQEKATSWFDPRIIPRRYQTAQLQKTPLAHQHSPIASPNSQLQQLVGGMMGPRSPSTQHLPRLP  
LDNNRLKNRPNPSPDARKKESADSGGLGGNGGAHNGSTPGSAHSYTPHQTPPTPEDFLAAMEDVEITPSENRRAR  
VAGVVNSPAPPMMEANDLESMDELDVPSINIPCELSSDFLSEVIGSNRMDNTWL PFKMRNLPASFFKPP

rs:XP\_018008841 [XP\_018008841] PREDICTED: uncharacterized protein  
LOC108666470 [Hyaella azteca]. 154..168

MSSAKRKPRTSPLEDEGLFTGPNQEDSYTGQNTEDSFTGKNKEDSFAGRKLVSSEFDSPALLDYDAVA  
SPSASSTSSEPSYVRQPGFEHHAHEVPVGRSSHTQQSDLKTQKNLLPKRIKKKKCRPDEGCDMIAIDVGPSVPST  
RPKIKKEPLPMKLRDLPPSFVWQPNRASCLPPSGTLLPPLLLGKDYHDVTDVVRPVTPEVGEQRVCRGDGSKYSV  
SSPSPTLSSSHLLNLHSPSSSSSIISSTINTSPSSSSLSALASQTSSSSSQPKSSIIFTGSLHSPPPDAVMSPNIQ  
PCTSPTSLYSASQSPTMKHHPYSYSSQSSCPALFGDLSQSPHSSSPILLSSTKSYQERRGETI IKVGNLTDLLSFLF  
DKVEQGDRLKQLLKRTRVRKGSNPPVRRHRDDPCLVGAFTGELLPLLDSTPHSSGASTPLGTRHTQQVEMV  
NLKGSNRTWSLPSLNVEPNYSQMLSELVMKL PMKLRDLPPSFVWQP

rs:XP\_018054102 [XP\_018054102] PREDICTED: LOW QUALITY PROTEIN:  
transcriptional coactivator YAP1-like [Atta colombica]. 46..60

MALNQDQDQLSKSNPVVRVDQNSESDLQALFDTVLKPDSCRPLQVPLRLRNLPSFFNPPSTGSKSPSI  
SHSRENSADSAFGAAVPATPNGGGSGVPPNGGTNGSGGGGGGGGXXXXXAAAGLTVSHPRAHSSPASLQQTYASA  
QQAPQHAPQPHARHHHHQKQRSYDVISTVDDLGLPLPHGWEQARTPEGQIYFLNHLTRTTTWEDPRKTAASVAA  
VAAAVESSKSNALGPLPDGWEQARTAEGEIYFINHQTRTTSWFDPRIPSHLQRTPASGAMLPQNWQLQQPTGIQS  
NQNLQACQKQKIRLQSLQLERERLQKQEQEIMRQVGIQQEMMLRQSTTDAVMDPFLSGINEHARQESADSGLGLG  
SAYSLPQASDDFLNIDENMDGTSERHCALNDLTKRLYRSHKYINGGAPMDTPDLSTLSDNIDSTDDLLPSLQAYY  
RCTGNLGM PLRLRNLPSFFNPP

rs:XP\_018299804 [XP\_018299804] PREDICTED: LOW QUALITY PROTEIN:  
transcriptional coactivator YAP1 [Trachymyrmex zeteki]. 46..60

MALNQDQDQLSKSNPVVRVDQNSESDLQALFDTVLKPDNKRPLQVPLRLRNLPSFFNPPSTGSKSPSI  
SHSRENSADSAFGAAVPATPNGGSSVPNGGTNGGGGGGGGGGNAAGAAGTGAVAAAAGLTVSHPRAHSSPASLQQ  
TYASAQQAPQHAPQPHARHHHHQKQRSYDVISTVDDLGLPLPHGWEQARTPEGQIYFLNHLTRTTTWEDPRKTAAS  
ASVAAVAAAVESSKSNALGPLPDGWEQARTAEGEIYFINHQTRTTSWFDPRIPSHLQRTPASGAMLPQNWQLQQP  
TGIQSNQNLQACQKQKIRLQSLQLERERLQKQEQEIMRQVGIQQEMMLRQSTTDAVMDPFLSGINEQHARQESAD  
SGLGLGSAYSLPQASDDFLNIDENMDSTSDGGAPMDTPDLSTLSDNIDSTDDLLPSLQNEEFSTDILDDVQSLI  
NPNTTKPENVTWL PLRLRNLPSFFNPP

rs:XP\_018494750 [XP\_018494750] PREDICTED: LOW QUALITY PROTEIN:  
transcriptional coactivator YAP1-A [Galendromus occidentalis]. 42..56

MATEGFVEQQGNHVVRYRQDSNLDELKFKVAMEGKSTLFGLPMMRNLPPSFFQQPVEGPGGIIPRPQI  
NHSRAHSSPASLEQTYRSAPQQPTHTRQOSYDLVDEEPLPEGWEMARTNTGQRYFLNHVHTTTTWEDPRKLNQO  
LSANHHSTAPPPHTTNPVINAKTLGPLPDGWEQSTSPGEVYFINHVDRTTSWFDPRIPINLQKAPTSXADLI  
PDSGSTDSINAVCAATSTLSLAQQQLQRLQQLQLERERMKQRQLEILRQPAFGLTTEQNNTINPNQLAVNNNS  
NNLGHTDPFLGGPHSRQESADSGLGLGSPFSLPEEFPTPFDNSANIGMEDASMDAMPVGAIVPANNCVAPEQMDS  
DDLMPSLNEMPDMPDLLPDMEALLTDNKDSVLTWL PMRMRNLPPSFFQQP

rs:XP\_018496354 [XP\_018496354] PREDICTED: transcription cofactor  
vestigial-like protein 2 [Galendromus occidentalis]. 154..168

MTRVAAPNPPPTSGGYFIAGPSSPQDFVPPSAFVEQKPENLHFEKFSSPPALKENYSSPSPPHGLISPG  
TSSPTIAPIDL PSTSTAVCSPEVLESKDDVGEATYVSPKCVVIKYYKTDVASVLDDHFQKALAQAGFGGSPRR  
SDDDTMDSKPLSQRNLPQSFFCPPNPQSVAASSGSYPPSPSSSTSSYPQAGPSQASPQIRASPSQMNGPSPSHLAS  
HSGHPSPSYLPLPSTSSNQSLTDFYPPPPTSSNDYESWSHYVHGYRAAHLSPQDLQTYAVANRHQFAHQVSK  
EPFPESPKSPKSPNDPPASPELTYLTAEPPQVVRMKNYSLNLLGNQQQRASC SA AVLGVNEKVMMDTWGQSVAR  
YHEQIQMNINMSGHPVAIQEPYPSNYAHPMSAAMTGLEATADTKDMYWF PLSQRNLPQSFFCPP

rs:XP\_004051940 [XP\_004051940] PREDICTED: protein **FAM181B** [Gorilla  
gorilla gorilla].>tr:G3QJ85\_GORGO [G3QJ85] SubName: Full=Family with  
sequence similarity 181 member B {ECO:0000313|Ensembl:ENSGGOP00000002470};  
221..235

MAVQAALLSTHPFVFPFGGGSPDGLGGAFGALDKCCFEDDETGAPAGALLSGAEGGDVREATRDLLSF  
IDSASSNIKLALDKPGKSKRVNHRKYLQKQIKRCSGLMGAAPPSPSAADTPAKRPLAAPSAPTVAAPAHGK  
AAPRREASQAAAAASLQSRSLAALFDSLHRVPGGAEPAGGEVAAPAAGLGGAGTGAGGDVAGPAGATAIPGARK



VPLRARNLPPSFFTEPSRAGGGGCGPSGPDVSLGDLEKGAEAVELFELLGPDYGAGTEAAVLLAAEPLDVFPAGA  
SVLRGPPPELEPGLFEPPIAVVGNLLYEPWSPVPGCPPTKKSPLTAPRGGLTLNEPLRPLYPAAADSPGGEDGPGH  
LASFAPFFPDICALPPPPPHQVSYDYSAGYSRTAYSSSLWRS DGVWEGAPGEEGAHRD PLRARNLPPSFFTEP

rs:XP\_018895535 [XP\_018895535] PREDICTED: protein **FAM181A** isoform X1  
[Gorilla gorilla gorilla]. 165..179

MACFVPQVSSVSFLGAASHQQSLSSSWKASCSGPLVMASDSDVKMLLNFNVLASSDIKAALDKSAPCRR  
SVDHRKYLQKQLKRFSQKYSRLPRGLPGRGAEPYLKRGSEDRPRLLLLDLGPDSSPGGGGGCKEKVLRNPYREEC  
LAKEQLPQRQHPEAAQPGQVPMRKRQLPASFWEEPPTHSHYHVGLEGGGLGPREGPPYEGKKNCKGLEPLGPETTL  
VPMSPRALAEKEPLKMPGVSLVGRVNAWSCCPFYHQPIYPGPLGALPQSPVPSLGLWRKSPAFFGELAHLCCKD  
VDGLGQKVCPRPVVLKPIPTKPAVPPPIFNVFGYL PMRKRQLPASFWEEP

rs:XP\_004055657 [XP\_004055657] PREDICTED: protein **FAM181A** isoform X2  
[Gorilla gorilla gorilla].>rs:XP\_004055658 [XP\_004055658] PREDICTED:  
protein **FAM181A** isoform X2 [Gorilla gorilla gorilla].>rs:XP\_018895536  
[XP\_018895536] PREDICTED: protein **FAM181A** isoform X2 [Gorilla gorilla  
gorilla]. 129..143

MASDSDVKMLLNFNVLASSDIKAALDKSAPCRRSVDHRKYLQKQLKRFSQKYSRLPRGLPGRGAEPYLK  
RGSEDRPRLLLLDLGPDSSPGGGGGCKEKVLRNPYREECLAKEQLPQRQHPEAAQPGQVPMRKRQLPASFWEEP  
PTHSHYHVGLEGGGLGPREGPPYEGKKNCKGLEPLGPETTLVPMSPRALAEKEPLKMPGVSLVGRVNAWSCCPFYH  
GQPIYPGPLGALPQSPVPSLGLWRKSPAFFGELAHLCCKDVDGLGQKVCPRPVVLKPIPTKPAVPPPIFNVFGYL  
PMRKRQLPASFWEEP

rs:XP\_018924866 [XP\_018924866] PREDICTED: LOW QUALITY PROTEIN: protein  
**FAM181B**-like [Cyprinus carpio]. 156..170

MAVQAAIMNSQFLNFCXPGSVM DYEVKLEGGFLGEVDCEGDFKETTDRDLSFIDSASSNIKLALDKP  
VKSKRKVNHRKYLQKQIKRCTGII SPGTTVPQEPCKRQGLPHNPTS NLSSKTPPKKDGIQANLQSKSLAALFN  
KAVRGERAKKPLRHRNLPPSFFTEPANSSRVTSTSGMSLKD LERGTPEAAEFLELLGPDYSNMVSEQDLFHTAP  
NRIQQEVTVGPEPYDSSHFFVSGGFLYTEPWGTCSSSPKKSADLRTVPLQPN IYTHTDLSGSMPEQSSPCALTF  
S NFFTDCSAPPVSYDLVNGYNRGSFSSL PLRHRNLPPSFFTEP

rs:XP\_018924872 [XP\_018924872] PREDICTED: LOW QUALITY PROTEIN: protein  
**FAM181B**-like [Cyprinus carpio]. 156..170

MAVQTAIMNSQFLNFCFPGSVM DYGVKLEGGFLGEVDCGGDFKETTDRDLSFIDSASSNIKLALDKP  
VKSKRKVTPRKYLQKQIKRCTGII SPGTTVPQEPCKRQGSPTPTS NLPAKMPPKDGMQASLQSKSLAALFN  
KAVRGERAKKPLRHRNLPPSFFTEPANSSRVTSTSGMSLKD LERGTPEAVDFLELLGPEYSNMVSEQDLFYTAP  
IRIQQDVTVGPEPYDSSHFFVSGGFLYTEPWGTCGGTSKKS GDMRTVPVQPNLYTHTDLSGSPVEQSSPCALTF  
S NFFTDCSAPPVSYDLVNGYNRGSFSSL PLRHRNLPPSFFTEP

rs:XP\_018944764 [XP\_018944764] PREDICTED: transcriptional coactivator  
YAP1-like [Cyprinus carpio]. 45..59

MDPSQHNPAGHQIVHVRGDSETDLEALFNAVMPKNTITPPSVPMRMRKLPDSFFKPPPEPKSHSRQAS  
TDAGTAGTLTPQHVRHSSPASLQLGAVSPGTLSSMVPSNAPPQH LRQSSYEIPDDVPLPPGWEMAKTPSGQRYF  
LNHNDQTTTWDPRKALLQMNQAAPASVPVQQQNIMNPASGGLPDGWEQAITSEGEIYYINHKNKTTSWLDPRL  
DPRYAMNQQRISQSAPVKQGSQLPSSPQSAVLGGNNQIRLQQIQMEKERLR IKQELLRQRPOELALRNQLPTSME  
HDGGTQNPVSSPSMGQDARNMTTNSSDPFLSSGTYHSRDESTDSGLSMSSYSVPRTPD DFLNSVDEMETGDSLGP  
SSMATQPSRFPDYLD AIPGTDVDLGTLEGESMAVEGEELMPSLQEQALSSDILNDMESVLAATKIDKENFLTWL  
PMRMRKLPDSFFKPP

rs:XP\_018969752 [XP\_018969752] PREDICTED: protein **FAM181A** [Cyprinus  
carpio]. 111..125

MMSSDSEVKTLLNFNVLASSDIKAALDRSAPCRRSVDHRKYLQKQLKRFSHRYAKMPCRCHPHRNGDSAL  
AKLSEEKAPHGTGTGRDVSAGSEEEARSQGQGQGHGQIPMPMRKRQLPASFWKEPQSSSGSRERLERFLKNNAS  
ATGRVRS PAVNGEKS KVVFD DSKANPLLSGSAACACACTLPYRALHSRFL LPHADAPFRSRAEPAHSFGDQQR  
SGAHVVIKPIPTK PALSSSAF SVFGF PMRKRQLPASFWKEP

rs:XP\_018978767 [XP\_018978767] PREDICTED: transcriptional coactivator  
YAP1 isoform X1 [Cyprinus carpio]. 45..59

MDPSQHNPAGHQI IHVRGDSETDLEALFNAVMPKNAITPPSVPMRMRKLPDSFFKPPPEPKSHSRQAS

TDAGTAGTLTPQHVAHSSPASLQLGAVSPGTLSSMGPANAPPQHLRQSSYEIPDDVPLPPGWEMAKTPSGQRYF  
LNHNDQTTTWQDPRKALLQMNQAAPASPVVQQQNMNPASGPLPDGWEQAITSSEGEIYYINHKNKTTSWLDPRL  
DPYAMNQQRISQGAPVKQGSQLPSSPQSGVLGGNNQIRLQIQMEKERLRKQELLRQRPOELALRNQLPTSME  
QDGGTQNPVSSPGMGQDARNMTTNSSDPFLNSGTYHSRDESTDSGLSMSSYSVPRTPDFFLNSVDEMETGDTLGP  
SSMATQPSRFPDYLDIAIPGTDVDLGTLEGESMAVEGEELMPSLQEQALSSDILNDMETVLAATKIDKENFLTWL  
PMRMRKLPDSFFKPP

rs:XP\_018978768 [XP\_018978768] PREDICTED: transcriptional coactivator  
YAP1 isoform X2 [Cyprinus carpio]. 45..59

MDPSQHNPPAGHQIIHVRGDSETDLEALFNAVMPKNAITPPSVPMRMRKLPDSFFKPPPEPKSHSRQAS  
TDAGTAGTLTPQHVAHSSPASLQLGAVSPGTLSSMGPANAPPQHLRQSSYEIPDDVPLPPGWEMAKTPSGQRYF  
LNHNDQTTTWQDPRKALLQMNQAAPASPVVQQQNMNPASAMNQQRISQGAPVKQGSQLPSSPQSGVLGGNNQI  
RLQIQMEKERLRKQELLRQRPOELALRNQLPTSMEQDGGTQNPVSSPGMGQDARNMTTNSSDPFLNSGTYHSR  
DESTDSGLSMSSYSVPRTPDFFLNSVDEMETGDTLGPSSMATQPSRFPDYLDIAIPGTDVDLGTLEGESMAVEGEE  
LMPSLQEQALSSDILNDMETVLAATKIDKENFLTWL PMRMRKLPDSFFKPP

rs:XP\_012991334 [XP\_012991334] PREDICTED: transcriptional coactivator  
YAP1 [Esox lucius].>tr:A0A3P9ANY5\_ESOLU [A0A3P9ANY5] SubName: Full=Yes-  
associated protein 1 {ECO:0000313|Ensembl:ENSELUP00000042445}; 45..59

MDPSQHNPPAGHQIVHVRGDSETDLEALFNAVMPKNTIVPPSVPMRMRKLPDSFFFTPEPKSHSRQAS  
TDAGTAGALPPHHVAHSSPASLQLGAVSPLLGMVPAGAPPSHLRQSSYEIPEDMPLPPGWEMAKTPSGQRYFLN  
HLDQSTTWQDPRKALLQMNQAAPPTSPVPVQPNILNPASGPLPDGWEQAITSDEGEIYYINHKNKTTSWLDPRLDT  
RYGLNQQRITQSAPGKQGGQLPSSPQSGGVMAGNNQLRLQVQMEKERLRKQELLRARPOELALRNQLPTNME  
QDVGTNPVSSPGMVQDARTMTTNSSDPFLNSGTYHSRDESTDSGLSMSSYSVPRTPDFFLNSVDEMDTGDSLPA  
SMGTQPSRFPDYLDIAIPGTDVDLGTLESESMAVEGEEELMPSLQEQALSSDILNDMESVLAATKIDKESFLTWL  
PMRMRKLPDSFFTPP

rs:XP\_012987194 [XP\_012987194] PREDICTED: transcriptional coactivator  
YAP1 [Esox lucius]. 48..62

MDARQGGQAPPVQGIHVRGDSQTDLEALFNAVINPKTATLPPSSLPMRMRKLPDSFFRQDPDRSHSR  
QASSDGNMVGSLAPHHVAHSSPASLPINTLVTPATNSMATQPLPDDMPLPPGWEMAKTTSQGPYFLNHLEQTTT  
WHDPRLSHLQTTAAPHPLSAPPHTHTLAHPGPNHTHTQSNASPNTPGLPEGWEQAVTPEGEVYYINHHTKTTT  
WLDPRLVQSTVSQVKPTTLTSDPVGVVTRRQQLQAEKDRLRRKQQLDVRPIRAQDVSVRSGLEHDGKTRNHVDP  
ALNGAHSRNESTDSGLSVSSFTTRTPDDLNTVELMDTGDSGAAQPMFLEAGPGVCMAMDGEELMPSIQEALSSE  
LLSDMDTVLWL PMRMRKLPDSFFRQP

rs:XP\_010877164 [XP\_010877164] PREDICTED: protein **FAM181A** [Esox lucius].  
124..138

MASADSEVKTLNLFVNLAASSDIKAALDKSAPCRRSVDHRKYLQKQLKRFSQKYSRLPRCHAHKASESGV  
AKALVDKCSSYPLETIHPSMTRINEKGCSDGQDENLKTQGNPTLDNDKTKQDQVPMRKRQLPASFWEEPRLPQNN  
KDTSQHVVKRSNGVTVINEAEKRKKTNEEPKSTFFLSNRRGSVEKEPFKLEVASHNVSVGCCPFQYHGHVVFQS  
HIVVPHSTMGFWGKATMSQTETPDMAQGHKHLAHVVVKPIPTKPTVQPSIFSVVFGFI PMRKRQLPASFWEEP

rs:XP\_019406804 [XP\_019406804] PREDICTED: protein **FAM181A** [Crocodylus  
porosus]. 126..140

MASDSEVKMLNLFVNLAASSDIKAALDKSAPCRRSVDHRKYLQKQLKRFSQKYSRIPRSHPSKSMESNMK  
RGVEDRNRSSHPDALDPNPCRAASEKALRGAEVEENLSGEGKQEQSPESARPDQVPMRKRQLPASFWEEPRLPTQ  
SLLVGSFASAGLDGLPKSRDLPSYEGKSKKSPDAIGPESPPVPVQPSREKEPIKVPGTSLSGRMNAWSCPFQYH  
GQPVYQTPGALPQSPFPGLGLWRKNTAPQGEIQHFCKEADATGQKLYRPVVLKPIPTKPAVPPPIFNVFGYI  
PMRKRQLPASFWEEP

rs:XP\_019485877 [XP\_019485877] PREDICTED: transcriptional coactivator  
YAP1 isoform X1 [Hipposideros armiger]. 85..99

MDPGQQPPQPAPQGGQPSAQAPQGGQPPSGPGQPAPPGSQAASQAPPAGHQIVHVRGDSETDLEALF  
NAVMPKNTANVPQTVPMRLRKLKLPDSFFKPPPEPKSHSRQASTDAGTAGALTPQHVAHSSPASLQLGAVSPGTLTP  
TGVVSGPAATPTAQHLRQSSFEIPDDVPLPAGWEMAKTSSGQRYFLNHIDQTTTWQDPRKAMLSQMNVTAPTSPP  
VQQNMMNSASGPLPDGWEQAMTQDGEIYYINHKNKTTSWLDPRLDPRFGKAMNQQRISQSAPVKQPPPLAPQSPQG  
GVMGGGNSNQQQMRLQQLQMEKERLRKQELLRQVRPQAMRNINPSTANSKPCQELALRSQLPQLEQDGGTQNP  
VSSPGMSQELRTMTTNSSDPFLNSGTYHSRDESTDSGLSMSSYSVPRTPDFFLNSVDEMDTGDTINQSTLPSQQ

NRFPDYLEAIPGTNVDLGTLEGDGMNIEGEELMPSLQEQALSSDILNDMESVLAATKLDKESFLTWL  
PMRLRKLPSFFKPP

rs:XP\_019485878 [XP\_019485878] PREDICTED: transcriptional coactivator  
YAP1 isoform X2 [Hipposideros armiger]. 85..99

MDPGQQPPPQPAPQGGQPSAQAPQGGPPSGPGQPAPPGSQAASQAPPAGHQIVHVRGDSETDLEALF  
NAVMNPKTANVPQTVPMRLRKLPSFFKPPPEPKSHSRQASTDAGTAGALTPQHVRHSSPASLQLGAVSPGTLTP  
TGVVSGPAATPTAQHLRQSSFEIPDDVPLPAGWEMAKTSSGQRYFLNHIDQTTTWQDPRKAMLSQMNVTAPTSPP  
VQQNMMNSASGPLPDGWEQAMTQDGEIYYINHKNTTSLWLDPRLDPRFAMNQRISQSAPVKQPPPLAPQSPQGGV  
MGGGNSNQQQMRLQQLQMEKERLRLKQOELLRQVRPQAMRNINPSTANSPKCQELALRSQLPTLEQDGGTQNPV  
SSPGMSQELRTMTTNSSDPFLNSGTYHSRDESTDSGLSMSSYSVPRTPDDFLNSVDEMDTGD TINQSTLPSQQNR  
FPDYLEAIPGTNVDLGTLEGDGMNIEGEELMPSLQEQALSSDILNDMESVLAATKLDKESFLTWL  
PMRLRKLPSFFKPP

rs:XP\_019485879 [XP\_019485879] PREDICTED: transcriptional coactivator  
YAP1 isoform X3 [Hipposideros armiger]. 85..99

MDPGQQPPPQPAPQGGQPSAQAPQGGPPSGPGQPAPPGSQAASQAPPAGHQIVHVRGDSETDLEALF  
NAVMNPKTANVPQTVPMRLRKLPSFFKPPPEPKSHSRQASTDAGTAGALTPQHVRHSSPASLQLGAVSPGTLTP  
TGVVSGPAATPTAQHLRQSSFEIPDDVPLPAGWEMAKTSSGQRYFLNHIDQTTTWQDPRKAMLSQMNVTAPTSPP  
VQQNMMNSASGPLPDGWEQAMTQDGEIYYINHKNTTSLWLDPRLDPRFGKAMNQRISQSAPVKQPPPLAPQSPQG  
GVMGGGNSNQQQMRLQQLQMEKERLRLKQOELLRQAMRNINPSTANSPKCQELALRSQLPTLEQDGGTQNPVSS  
PGMSQELRTMTTNSSDPFLNSGTYHSRDESTDSGLSMSSYSVPRTPDDFLNSVDEMDTGD TINQSTLPSQQNRFP  
DYLEAIPGTNVDLGTLEGDGMNIEGEELMPSLQEQALSSDILNDMESVLAATKLDKESFLTWL  
PMRLRKLPSFFKPP

rs:XP\_019485881 [XP\_019485881] PREDICTED: transcriptional coactivator  
YAP1 isoform X4 [Hipposideros armiger]. 85..99

MDPGQQPPPQPAPQGGQPSAQAPQGGPPSGPGQPAPPGSQAASQAPPAGHQIVHVRGDSETDLEALF  
NAVMNPKTANVPQTVPMRLRKLPSFFKPPPEPKSHSRQASTDAGTAGALTPQHVRHSSPASLQLGAVSPGTLTP  
TGVVSGPAATPTAQHLRQSSFEIPDDVPLPAGWEMAKTSSGQRYFLNHIDQTTTWQDPRKAMLSQMNVTAPTSPP  
VQQNMMNSASGPLPDGWEQAMTQDGEIYYINHKNTTSLWLDPRLDPRFAMNQRISQSAPVKQPPPLAPQSPQGGV  
MGGGNSNQQQMRLQQLQMEKERLRLKQOELLRQAMRNINPSTANSPKCQELALRSQLPTLEQDGGTQNPVSSPG  
MSQELRTMTTNSSDPFLNSGTYHSRDESTDSGLSMSSYSVPRTPDDFLNSVDEMDTGD TINQSTLPSQQNRFPDY  
LEAIPGTNVDLGTLEGDGMNIEGEELMPSLQEQALSSDILNDMESVLAATKLDKESFLTWL  
PMRLRKLPSFFKPP

rs:XP\_019485882 [XP\_019485882] PREDICTED: transcriptional coactivator  
YAP1 isoform X5 [Hipposideros armiger]. 85..99

MDPGQQPPPQPAPQGGQPSAQAPQGGPPSGPGQPAPPGSQAASQAPPAGHQIVHVRGDSETDLEALF  
NAVMNPKTANVPQTVPMRLRKLPSFFKPPPEPKSHSRQASTDAGTAGALTPQHVRHSSPASLQLGAVSPGTLTP  
TGVVSGPAATPTAQHLRQSSFEIPDDVPLPAGWEMAKTSSGQRYFLNHIDQTTTWQDPRKAMLSQMNVTAPTSPP  
VQQNMMNSASGPLPDGWEQAMTQDGEIYYINHKNTTSLWLDPRLDPRFGKAMNQRISQSAPVKQPPPLAPQSPQG  
GVMGGGNSNQQQMRLQQLQMEKERLRLKQOELLRQVRPQELALRSQLPTLEQDGGTQNPVSSPGMSQELRTMTT  
NSSDPFLNSGTYHSRDESTDSGLSMSSYSVPRTPDDFLNSVDEMDTGD TINQSTLPSQQNRFPDYLEAIPGTNVD  
LGTLEGDGMNIEGEELMPSLQEQALSSDILNDMESVLAATKLDKESFLTWL PMRLRKLPSFFKPP

rs:XP\_019485883 [XP\_019485883] PREDICTED: transcriptional coactivator  
YAP1 isoform X6 [Hipposideros armiger]. 85..99

MDPGQQPPPQPAPQGGQPSAQAPQGGPPSGPGQPAPPGSQAASQAPPAGHQIVHVRGDSETDLEALF  
NAVMNPKTANVPQTVPMRLRKLPSFFKPPPEPKSHSRQASTDAGTAGALTPQHVRHSSPASLQLGAVSPGTLTP  
TGVVSGPAATPTAQHLRQSSFEIPDDVPLPAGWEMAKTSSGQRYFLNHIDQTTTWQDPRKAMLSQMNVTAPTSPP  
VQQNMMNSASGPLPDGWEQAMTQDGEIYYINHKNTTSLWLDPRLDPRFAMNQRISQSAPVKQPPPLAPQSPQGGV  
MGGGNSNQQQMRLQQLQMEKERLRLKQOELLRQVRPQELALRSQLPTLEQDGGTQNPVSSPGMSQELRTMTTNS  
SDPFLNSGTYHSRDESTDSGLSMSSYSVPRTPDDFLNSVDEMDTGD TINQSTLPSQQNRFPDYLEAIPGTNVDL  
GTLEGDGMNIEGEELMPSLQEQALSSDILNDMESVLAATKLDKESFLTWL PMRLRKLPSFFKPP

rs:XP\_019485884 [XP\_019485884] PREDICTED: transcriptional coactivator  
YAP1 isoform X7 [Hipposideros armiger]. 85..99

MDPGQQPPPQPAPQGGQPSAQAPQGGPPSGPGQPAPPGSQAASQAPPAGHQIVHVRGDSETDLEALF

NAVMNPKTANVPQTVPMRLRKLKLPDSFFKPPPEPKSHSRQASTDAGTAGALTPQHVRHSSPASLQLGAVSPGTLTP  
TGVVSGPAATPTAQHLRQSSFEIPDDVPLPAGWEMAKTSSGQRYFLNHIDQTTTWQDPRKAMLSQMNVTAPTSPP  
VQQNMMNSASGPLPDGWEQAMTQDGEIYYINHKNKTTSWLDPRLDPRFGKAMNQRIQSAPVKQPPPLAPQSPQG  
GVMGGGNSNQQQMRLQQLQMEKERLRLKQQELLRQELALRSQLPTLEQDGGTQNPVSSPGMSQELRTMTTNSSD  
PFLNSGTYHSRDESTDSGLSMSSYSVPRTPDDFLNSVDEMMDTGDGTINQSTLPSQQNRFPDYLEAIPGTNVDLGT  
EGDGMNIEGEEMLPMSLQEQALSSDILNDMESVLAATKLDKESFLTWL PMRLRKLKLPDSFFKPP

rs:XP\_019485885 [XP\_019485885] PREDICTED: transcriptional coactivator  
YAP1 isoform X8 [Hipposideros armiger]. 85..99

MDPGQQPPPPQAPQGGQPSAQAPQGGQPPSGPGQPAPPGSQAASQAPPAGHQIVHVRGDSETDLEALF  
NAVMNPKTANVPQTVPMRLRKLKLPDSFFKPPPEPKSHSRQASTDAGTAGALTPQHVRHSSPASLQLGAVSPGTLTP  
TGVVSGPAATPTAQHLRQSSFEIPDDVPLPAGWEMAKTSSGQRYFLNHIDQTTTWQDPRKAMLSQMNVTAPTSPP  
VQQNMMNSASGPLPDGWEQAMTQDGEIYYINHKNKTTSWLDPRLDPRFAMNQRIQSAPVKQPPPLAPQSPGGV  
MGGGNSNQQQMRLQQLQMEKERLRLKQQELLRQELALRSQLPTLEQDGGTQNPVSSPGMSQELRTMTTNSSDPF  
LNSGTYHSRDESTDSGLSMSSYSVPRTPDDFLNSVDEMMDTGDGTINQSTLPSQQNRFPDYLEAIPGTNVDLGT  
EGDGMNIEGEEMLPMSLQEQALSSDILNDMESVLAATKLDKESFLTWL PMRLRKLKLPDSFFKPP

rs:XP\_019485886 [XP\_019485886] PREDICTED: transcriptional coactivator  
YAP1 isoform X9 [Hipposideros armiger]. 85..99

MDPGQQPPPPQAPQGGQPSAQAPQGGQPPSGPGQPAPPGSQAASQAPPAGHQIVHVRGDSETDLEALF  
NAVMNPKTANVPQTVPMRLRKLKLPDSFFKPPPEPKSHSRQASTDAGTAGALTPQHVRHSSPASLQLGAVSPGTLTP  
TGVVSGPAATPTAQHLRQSSFEIPDDVPLPAGWEMAKTSSGQRYFLNHIDQTTTWQDPRKAMLSQMNVTAPTSPP  
VQQNMMNSASAMNQRIQSAPVKQPPPLAPQSPGGVMGGGNSNQQQMRLQQLQMEKERLRLKQQELLRQVRPQ  
AMRNINPSTANSPKCQELALRSQLPTLEQDGGTQNPVSSPGMSQELRTMTTNSSDPFLNSGTYHSRDESTDSGLS  
MSSYSVPRTPDDFLNSVDEMMDTGDGTINQSTLPSQQNRFPDYLEAIPGTNVDLGTLEGDGMNIEGEEMLPMSLQEQAL  
SSDILNDMESVLAATKLDKESFLTWL PMRLRKLKLPDSFFKPP

rs:XP\_019485887 [XP\_019485887] PREDICTED: transcriptional coactivator  
YAP1 isoform X10 [Hipposideros armiger]. 85..99

MDPGQQPPPPQAPQGGQPSAQAPQGGQPPSGPGQPAPPGSQAASQAPPAGHQIVHVRGDSETDLEALF  
NAVMNPKTANVPQTVPMRLRKLKLPDSFFKPPPEPKSHSRQASTDAGTAGALTPQHVRHSSPASLQLGAVSPGTLTP  
TGVVSGPAATPTAQHLRQSSFEIPDDVPLPAGWEMAKTSSGQRYFLNHIDQTTTWQDPRKAMLSQMNVTAPTSPP  
VQQNMMNSASAMNQRIQSAPVKQPPPLAPQSPGGVMGGGNSNQQQMRLQQLQMEKERLRLKQQELLRQAMRN  
INPSTANSPKCQELALRSQLPTLEQDGGTQNPVSSPGMSQELRTMTTNSSDPFLNSGTYHSRDESTDSGLSMSSY  
SVPRTPDDFLNSVDEMMDTGDGTINQSTLPSQQNRFPDYLEAIPGTNVDLGTLEGDGMNIEGEEMLPMSLQEQALSSDI  
LNDMESVLAATKLDKESFLTWL PMRLRKLKLPDSFFKPP

rs:XP\_019485888 [XP\_019485888] PREDICTED: transcriptional coactivator  
YAP1 isoform X11 [Hipposideros armiger]. 85..99

MDPGQQPPPPQAPQGGQPSAQAPQGGQPPSGPGQPAPPGSQAASQAPPAGHQIVHVRGDSETDLEALF  
NAVMNPKTANVPQTVPMRLRKLKLPDSFFKPPPEPKSHSRQASTDAGTAGALTPQHVRHSSPASLQLGAVSPGTLTP  
TGVVSGPAATPTAQHLRQSSFEIPDDVPLPAGWEMAKTSSGQRYFLNHIDQTTTWQDPRKAMLSQMNVTAPTSPP  
VQQNMMNSASAMNQRIQSAPVKQPPPLAPQSPGGVMGGGNSNQQQMRLQQLQMEKERLRLKQQELLRQVRPQ  
ELALRSQLPTLEQDGGTQNPVSSPGMSQELRTMTTNSSDPFLNSGTYHSRDESTDSGLSMSSYSVPRTPDDFLNS  
VDEMMDTGDGTINQSTLPSQQNRFPDYLEAIPGTNVDLGTLEGDGMNIEGEEMLPMSLQEQALSSDILNDMESVLAATK  
LDKESFLTWL PMRLRKLKLPDSFFKPP

rs:XP\_019485889 [XP\_019485889] PREDICTED: transcriptional coactivator  
YAP1 isoform X12 [Hipposideros armiger]. 85..99

MDPGQQPPPPQAPQGGQPSAQAPQGGQPPSGPGQPAPPGSQAASQAPPAGHQIVHVRGDSETDLEALF  
NAVMNPKTANVPQTVPMRLRKLKLPDSFFKPPPEPKSHSRQASTDAGTAGALTPQHVRHSSPASLQLGAVSPGTLTP  
TGVVSGPAATPTAQHLRQSSFEIPDDVPLPAGWEMAKTSSGQRYFLNHIDQTTTWQDPRKAMLSQMNVTAPTSPP  
VQQNMMNSASAMNQRIQSAPVKQPPPLAPQSPGGVMGGGNSNQQQMRLQQLQMEKERLRLKQQELLRQELAL  
RSQLPTLEQDGGTQNPVSSPGMSQELRTMTTNSSDPFLNSGTYHSRDESTDSGLSMSSYSVPRTPDDFLNSVDEM  
DTGDGTINQSTLPSQQNRFPDYLEAIPGTNVDLGTLEGDGMNIEGEEMLPMSLQEQALSSDILNDMESVLAATKLDKE  
SFLTWL PMRLRKLKLPDSFFKPP

rs:XP\_019471397 [XP\_019471397] PREDICTED: protein **FAM181A** [Meleagris  
gallopavo].>rs:XP\_003206749 [XP\_003206749] PREDICTED: protein **FAM181A**

[Meleagris gallopavo].>tr:G3UU06\_MELGA [G3UU06] SubName: Full=Family with sequence similarity 181 member A {ECO:0000313|Ensembl:ENSMGAP00000019245}; 127..141

MASDSEVKTLLNFVNLAASDIKAALDKSAPCRRSVDHRKYLQKQLKRFSQKYSRVPRCHPAKPLECGPR  
RGAEDRARSCQPEMPDPGPLSGAATEKVLQAAETEESLVGEQAVPEQNPEVNRPDQVPMRKRQLPASFWEEP  
RPPQSLPARGFHPGPEGLPVPRDPPPFEGKSKRNQDSIGPESHEPALNAGEKDATGVLSGQVGAWTCCPFPCPGPAV  
YQPPGTLHPSFPFGLGLWRKGTATLPAAEQPFCKEAEGTGQKLYRPVVLKPIPTKPTIPPPIFNVFGYL  
PMRKRQLPASFWEEP

rs:XP\_019725814 [XP\_019725814] PREDICTED: protein **FAM181A** [Hippocampus comes]. 105..119

MANADSEVRTLLNFVNLAASDIKAALDKSAPCRRSVDHRKYLQKQLKRFSQKYSRVPRCHPLRSAQCAK  
PIADLHFPQGPEKGGGSGVGCVQTSADKVGGSVQVPMRKRQLPASFWEEP  
PKMRKTEHSHSGLRKNHSALSETREH  
RKGQDEDAKVKEVLRRLERNSSHGLSVCACCPFQFQQHQQQILHGHVVVPHPALGLWCKAEFERLEQPRGQKIH  
THVVVKPIPTKPSIPSPIFSVMGFI PMRKRQLPASFWEEP

rs:XP\_019742859 [XP\_019742859] PREDICTED: protein **FAM181B** [Hippocampus comes]. 136..150

MAAIMNPQFMSFCFPGSAMDGGLLGEPEKEEDYKETTRELLSFMDSASSNIKLALDKPVKSKRKNHRK  
YLQKQIKRCTGIVNVTDAAGKGGSSAPAGKTVPKRDGVQASLQNRSLAALFSPAKEIRGEKARKPPLRHRNLPP  
SFFTEPANCSKVNVPVAGMSLRELERANPEAADFFDLGPDYVGVAAEQELYQSVPGPDAATATSCDGHFVGGPL  
YPESWTS CSPPLARKLPTPAQPPLYCHQEAATPVGAEDNALCSLAFSNFFTD  
CSVPQVNYDLTCDYNRTHYSSL  
PLRHRNLPPSFFTEP

rs:XP\_019742896 [XP\_019742896] PREDICTED: transcriptional coactivator YAP1 isoform X1 [Hippocampus comes].>rs:XP\_019742897 [XP\_019742897] PREDICTED: transcriptional coactivator YAP1 isoform X1 [Hippocampus comes]. 45..59

MDPSQHNPPAGHQIVHVRGDSETDLEALFNAVMPKNTIVPPSVPMRMRKLPDSFFKPPPEPKSHSRQAS  
TDAGTGGALTPHHVRAHSSPASLQMGTVSGGSLSGMPAAAAAPQHLRQSSYEIPDDVPLPPGWEMAKTASGQRYF  
LNHIDQTTTWQDPRKALLQMNQAPPPSSVPVQOQNLMPASGPLEGWEQAITSEGEIYYINHKNKTT  
SWLDPRL  
DPRFALNQQRI  
SQSAPVKQGGQLPSGTL  
SGVNLRLQKMEKERLRLKQELLRQRPQELALRNQLPTSMEQDGGGT  
NPVSSPMAQDARTMTANSSDPFLNSGTYHSRDESTDSGLSMSSYSVPRT  
PDDFLNSVDEMDTGDPLPSSMGTQPS  
RFPDYLD  
AIPGTDVLDLGTLEGESMAVEGEELMPSLQEQALSSEILNDMESVLAATKIDKESF  
LTLWLRGGGGARRGH  
LLHSPPPPPACF PMRMRKLPDSFFKPP

rs:XP\_019742898 [XP\_019742898] PREDICTED: transcriptional coactivator YAP1 isoform X2 [Hippocampus comes]. 45..59

MDPSQHNPPAGHQIVHVRGDSETDLEALFNAVMPKNTIVPPSVPMRMRKLPDSFFKPPPEPKSHSRQAS  
TDAGTGGALTPHHVRAHSSPASLQMGTVSGGSLSGMPAAAAAPQHLRQSSYEIPDDVPLPPGWEMAKTASGQRYF  
LNHIDQTTTWQDPRKALLQMNQAPPPSSVPVQOQNLMPASGPLEGWEQAITSEGEIYYINHKNKTT  
SWLDPRL  
DPRFALNQQRI  
SQSAPVKQGGQLPSGTL  
SGVNLRLQKMEKERLRLKQELLRQRPQELALRNQLPTSMEQDGGGT  
NPVSSPMAQDARTMTANSSDPFLNSGTYHSRDESTDSGLSMSSYSVPRT  
PDDFLNSVDEMDTGDPLPSSMGTQPS  
RFPDYLD  
AIPGTDVLDLGTLEGESMAVEGEELMPSLQEQALSSEILNDMESVLAATKIDKESF  
LTLWLRGGGGARRGH  
LHSPPPPPACF PMRMRKLPDSFFKPP

rs:XP\_019742899 [XP\_019742899] PREDICTED: transcriptional coactivator YAP1 isoform X3 [Hippocampus comes].>rs:XP\_019742900 [XP\_019742900] PREDICTED: transcriptional coactivator YAP1 isoform X3 [Hippocampus comes].>rs:XP\_019742901 [XP\_019742901] PREDICTED: transcriptional coactivator YAP1 isoform X3 [Hippocampus comes]. 45..59

MDPSQHNPPAGHQIVHVRGDSETDLEALFNAVMPKNTIVPPSVPMRMRKLPDSFFKPPPEPKSHSRQAS  
TDAGTGGALTPHHVRAHSSPASLQMGTVSGGSLSGMPAAAAAPQHLRQSSYEIPDDVPLPPGWEMAKTASGQRYF  
LNHIDQTTTWQDPRKALLQMNQAPPPSSVPVQOQNLMPASGPLEGWEQAITSEGEIYYINHKNKTT  
SWLDPRL  
DPRFALNQQRI  
SQSAPVKQGGQLPSGTL  
SGVNLRLQKMEKERLRLKQELLRQRPQELALRNQLPTSMEQDGGGT  
NPVSSPMAQDARTMTANSSDPFLNSGTYHSRDESTDSGLSMSSYSVPRT  
PDDFLNSVDEMDTGDPLPSSMGTQPS  
RFPDYLD  
AIPGTDVLDLGTLEGESMAVEGEELMPSLQEQALSSEILNDMESVLAATKIDKESF  
LTLWLRGGGGARRGH  
LHSPPPPPACF PMRMRKLPDSFFKPP

rs:XP\_019742903 [XP\_019742903] PREDICTED: transcriptional coactivator  
YAP1 isoform X4 [Hippocampus comes]. 45..59

MDPSQHNPPAGHQIVHVRGDSETDLEALFNAVMPKNTIVPPSVPMRMRKLPDSFFKPPPEPKSHSRQAS  
TDAGTGGALTPHHVRAHSSPASLQMGTVSGGSLSGMPAAAAAPQHLRQSSYEIPDDVPLPPGWEMAKTASGQRYF  
LNHIDQTTTWQDPRKALLQMNQAPPPSSVPVQQQNLMPASALNQQRISQSAPVKQGGQLPSGTLGSGVNQLRLQK  
MEKERLRLKQELLRQRQELALRNQLPTSMEQDGGGTNPVSSPMAQDARTMTANSSDPFLNSGTYHSRDESTDSG  
LSMSSYSVPRTPDDFLNSVDEMMDTGDPLPSSMGTQPSRFPDYLDALPGTDVDLGTLEGESMAVEGEELMPSLQEA  
LSSEILNDMESVLAATKIDKESFLTWLRGGGGARRGHLHPSPPPPPPACF PMRMRKLPDSFFKPP

rs:XP\_019742904 [XP\_019742904] PREDICTED: transcriptional coactivator  
YAP1 isoform X5 [Hippocampus comes]. 45..59

MDPSQHNPPAGHQIVHVRGDSETDLEALFNAVMPKNTIVPPSVPMRMRKLPDSFFKPPPEPKSHSRQAS  
TDAGTGGALTPHHVRAHSSPASLQMGTVSGGSLSGMPAAAAAPQHLRQSSYEIPDDVPLPPGWEMAKTASGQRYF  
LNHIDQTTTWQDPRKALLQMNQAPPPSSVPVQQQNLMPASALNQQRISQSAPVKQGGQLPSGTLGSGVNQLRLQK  
MEKERLRLKQELLRQRQELALRNQLPTSMEQDGGGTNPVSSPMAQDARTMTANSSDPFLNSGTYHSRDESTDSG  
LSMSSYSVPRTPDDFLNSVDEMMDTGDPLPSSMGTQPSRFPDYLDALPGTDVDLGTLEGESMAVEGEELMPSLQEA  
LSSEILNDMESVLAATKIDKESFLTWL PMRMRKLPDSFFKPP

rs:XP\_019715103 [XP\_019715103] PREDICTED: transcriptional coactivator  
YAP1-like [Hippocampus comes]. 49..63

MDAHRGGGSAPPAGQVHVVRGDSQSELEALFSAVMNPAPKAPQOPASLPMRMRKLPDSFFKPPDPRSHS  
RQASSDGGACASLTPHHVRAHSSPASLQMGTVSGGSLSGMPAAAAAVAAAAASPPVIPPDDVPLPHGWEMAKTPTGQRYFLNHLH  
KTTTWHDPRLTQLQSAAPPQPSPPVHAHSLSNPATATTPPNCNPDAGGLPEGWERAATAEGDVYIDHVNKSTT  
WLHPRLGLLSLVTTQQRKEKERLRCKQMQMNTQVITNFAENLFFFFFFLNSQGAITDAERCVVINAQARVVSSL  
PRSSDLALASADHMDTGECESSTLQDSMPAMSESEELMPCIEGLSSDLLMDMETVLSGSHMDRDSLLTWL  
PMRMRKLPDSFFKPP

rs:XP\_019760455 [XP\_019760455] PREDICTED: transcriptional coactivator  
YAP1-A isoform X1 [Dendroctonus ponderosae]. 41..55

MARNQDEAKQVVRVDQDSETDLQALFDSVLKPDSCRPLQVPWSMRKLPDSFFTPPSTGSKSINHSRENS  
VDSAFDVGSPVNSVPLQTAHHRHSSPASLQQTYAVGQQQPPAHHHIKQRSYDVASKSEDNTPLPPGWEQARTPE  
GQVYYLDHTTRTTTWEDPRKTLAATQQHQSQEHLVSHPHTSPTSTNAKVNNDELGALPEGWEQAQTEPEGEIYFI  
NHQTRTTSWFDPRIPQHLQQRSPGSTLVQPPWHASISSSPQKAQQIRLQQLQLERERLQQRQOEIRRQOEIMMRP  
SSTDLPVMDPFLSGLTDHSRQESGDSGLGMGTSYSMPHTPEDYLSNMEDNIDVGSDSHPLTPDMSISDNIDSTDL  
VPTLSLDEFPIILDDVQSLINPATTKPDNSLIWL PWSMRKLPDSFFTPP

rs:XP\_019760457 [XP\_019760457] PREDICTED: WW domain-containing  
transcription regulator protein 1 isoform X2 [Dendroctonus ponderosae].  
41..55

MARNQDEAKQVVRVDQDSETDLQALFDSVLKPDSCRPLQVPWSMRKLPDSFFTPPSTGSKSINHSRENS  
VDSAFDVGSPVNSVPLQTAHHRHSSPASLQQTYAVGQQQPPAHHHIKQRSYDVASKSEDNTPLPPGWEQARTPE  
GQVYYLDHTTRTTTWEDPRKTLAATQQHQSQEHLVSHPHTSPTSTTQHLQQRSPGSTLVQPPWHASISSSPQKAQ  
QIRLQQLQLERERLQQRQOEIRRQOEIMMRPSSTDLPVMDPFLSGLTDHSRQESGDSGLGMGTSYSMPHTPEDYL  
SNMEDNIDVGSDSHPLTPDMSISDNIDSTDLVPTLSLDEFPIILDDVQSLINPATTKPDNSLIWL  
PWSMRKLPDSFFTPP

rs:XP\_005177963 [XP\_005177963] PREDICTED: transcriptional coactivator  
yorkie [Musca domestica].>tr:A0A1I8MML4\_MUSDO [A0A1I8MML4] SubName:

Full=Uncharacterized protein {ECO:0000313|VectorBase:MDOA006533-PA};  
65..79

MSLSKSSASDDANKCSVKTEDSTSAASKSSINLVVRNYQNSDENLRALFDSVLNPSSESNRPLQVPFRMR  
KLPNSFFTPPAASPKSPTVSHSRANSVDSAYDCGSQPNINQTSVASSLSDLQTTAATAVQVQQQSTSTINSQSAA  
STSAAPQGEPRQLQICHSRAHSSPASLQQSYNIHGGGNVAEETPFLLQQQSDVARAANNASNAPGFPSNLLGYNAAT  
AAVAAAAGLNNSIIIGISGAGAPGPLQSYHMKQRSYDVISPIQLQNELGPLPPGWEQAKTHDQIYYLNHTTKTT  
QWEDPRTQFKQQTLNSASNARAI GKTAAGENILASSNLGPLEGWEQAMTETGEVYFINHIDRTTSWNPRLSD  
PRFPILIQKEIKPKTEMSVWNATEIDKSDMFQKAGQKSVNKHNI SLHMDPFLSGDNHARQESSDSGLSLSNS  
FAVNNDFITHMDSMDCISENGSIIIDNLDLTLQNDNI IMMNDMLNSPSNKPNDLEWYKLN  
PFRMRKLPNSFFTPP

rs:XP\_010863506 [XP\_010863506] PREDICTED: protein **FAM181B** [*Esox lucius*].  
173..187

MAVQTAVMNSPFINFCFPGAVLMEYDMDKSLDGSLLGEMGSEEGGDFRETTRDLLSFIDSASSNIKLAL  
DKPVKSKRKVNHRKYLQKQIKRCTGIISPLGNPAPAAPGPGGLGNPKRQSGSPTQAQPHTSPFQPKPILKRDGL  
QANLQSKSLAALFKPVKDPVKGERAKKPLRHRNLPLSFFTEPANSPTTATNTPGVSTSTGMFLEDLRRGGNPE  
AADFFELLGPDYSQMLGDQDLFQPQSRAGRVFQHLNPDINGPDQALPPSYDPQQLVGGFLYAEPWSTSTCTGPSK  
KGGENTRNSLGPQTMLYSHSDPPMTGSGEDNTLCALAFSNYFPDCSVPQVSYDLSGGGYTRTVFSSLQQ  
PLRHRNLPLSFFTEP

rs:XP\_011424676 [XP\_011424676] PREDICTED: uncharacterized protein  
LOC105326371 isoform X1 [*Crassostrea gigas*]. 123..137

MFQVQQSRELDMKRHNESSTLLNFVDIASSNIKMALDRPTKSKRKVNHRKYLQKQLKSCGTVQQEDHS  
RRQLSGTQSIKLMRKDGAQSGVQMKSLQDLFDPRTLHEKCCADPCSKSRGSKVPLRKRNLPPSFFLEPSRPEQRD  
SLVESLTSALPDDFLHSFHRAPELDTLSSDTLDSILGNHDFQELLVGQWINDSSRDSSESDDPCSSNSDYSTFNNT  
VYFSEIRSPDEFQAEAWLSPQICSNTSQTMTFDNASSQVCHQPFQQLLPEPKSNPGMSPRDTSSKLPTFFQAFL  
NRDCLSSSQWGEVVFYSCYTYL PLRKRNLPPSFFLEP

rs:XP\_011424677 [XP\_011424677] PREDICTED: uncharacterized protein  
LOC105326371 isoform X2 [*Crassostrea gigas*].>tr:K1QP49\_CRAGI [K1QP49]  
SubName: Full=Uncharacterized protein {ECO:0000313|EMBL:EKC30580.1};  
112..126

MKRHNESSTLLNFVDIASSNIKMALDRPTKSKRKVNHRKYLQKQLKSCGTVQQEDHSRRQLSGTQSIK  
LMRKDGAQSGVQMKSLQDLFDPRTLHEKCCADPCSKSRGSKVPLRKRNLPPSFFLEPSRPEQRD  
DDFLHSFHRAPELDTLSSDTLDSILGNHDFQELLVGQWINDSSRDSSESDDPCSSNSDYSTFNNTVYFSEIRSPDE  
FPQAEAWLSPQICSNTSQTMTFDNASSQVCHQPFQQLLPEPKSNPGMSPRDTSSKLPTFFQAFLNRDCLSSSQW  
GEVVFYSCYTYL PLRKRNLPPSFFLEP

rs:XP\_019924740 [XP\_019924740] PREDICTED: transcriptional coactivator  
YAP1-A isoform X1 [*Crassostrea gigas*]. 43..57

MSQDMQERKGTQVVHVRENSGNELEALFQYAANPNSELGGQIPFRQRKLPESFFHEPKSSRPGHMKQGS  
NDSTGFPGQMNPGMGAHMRAHSSPATLQQSLSAVPQPPSHARQRSCDALLDPIESEPLPPGWEMAKTQDGQRYYL  
NTSEKNLYKIDKGKEMLLPMDNEGHLTQITTWQDPRKGS SNALNSRTPPNSQSPNVSLQNLGPLPHGWEQASTPE  
GDIYFINHIERTTSWYDPRIPQLQQLRLSTSQPQSVQQVQRQMNARMGQPPVQPPVNRMGAKSPASVQFSKI  
QMEKELLRKRQEDLQHQEMLLRAQMQQQIHDNPPTSQGIVISQSMEMTTVADPFLGQSNV SANHIKQESSDSGV  
GGMGTGTPYGLSRTPEDFLSNVSEMEQDGGGHRHSEFNMDIGNIGGNEENS NMDS EDLVPSLQEDISNELLNDM  
ESVLNVNKLNDNILAGDNSLTWL PFRQRKLPESFFHEP

rs:XP\_019924741 [XP\_019924741] PREDICTED: transcriptional coactivator  
YAP1-A isoform X2 [*Crassostrea gigas*]. 43..57

MSQDMQERKGTQVVHVRENSGNELEALFQYAANPNSELGGQIPFRQRKLPESFFHEPKSSRPGHMKQGS  
NDSTGFPGQMNPGMGAHMRAHSSPATLQQSLSAVPQPPSHARQRSCDALLDPIESEPLPPGWEMAKTQDGQRYYL  
NTSEKNLYNHLTQITTWQDPRKGS SNALNSRTPPNSQSPNVSLQNLGPLPHGWEQASTPEGDIYFINHIERTTSW  
YDPRIPQLQQLRLSTSQPQSVQQVQRQMNARMGQPPVQPPVNRMGAKSPASVQFSKI QMEKELLRKRQEDLQ  
HQEMLLRAQMQQQIHDNPPTSQGIVISQSMEMTTVADPFLGQSNV SANHIKQESSDSGVGGMGTGTPYGLSRTPE  
DFLSNVSEMEQDGGGHRHSEFNMDIGNIGGNEENS NMDS EDLVPSLQEDISNELLNDMESVLNVNKLNDNILAG  
DNSLTWL PFRQRKLPESFFHEP

rs:XP\_019924742 [XP\_019924742] PREDICTED: transcriptional coactivator  
YAP1-A isoform X3 [*Crassostrea gigas*]. 43..57

MSQDMQERKGTQVVHVRENSGNELEALFQYAANPNSELGGQIPFRQRKLPESFFHEPKSSRPGHMKQGS  
NDSTGFPGQMNPGMGAHMRAHSSPATLQQSLSAVPQPPSHARQRSCDALLDPIESEPLPPGWEMAKTQDGQRYYL  
NHLTQITTWQDPRKGS SNALNSRTPPNSQSPNVSLQNLGPLPHGWEQASTPEGDIYFINHIERTTSWYDPRIPQL  
LQQLRLSTSQPQSVQQVQRQMNARMGQPPVQPPVNRMGAKSPASVQFSKI QMEKELLRKRQEDLQHQEMLLRA  
QMQQQIHDNPPTSQGIVISQSMEMTTVADPFLGQSNV SANHIKQESSDSGVGGMGTGTPYGLSRTPEDFLSNV  
SEMEQDGGGHRHSEFNMDIGNIGGNEENS NMDS EDLVPSLQEDISNELLNDMESVLNVNKLNDNILAGDNSLTWL  
PFRQRKLPESFFHEP

rs:XP\_011434467 [XP\_011434467] PREDICTED: uncharacterized protein  
LOC105333263 [*Crassostrea gigas*]. 262..276

MASLSAAQVPLLDVNFGLGSTQKSYGGKKAPHGFHSYTEEDEPLHLTSNIPTKSYGGKRAPTSSLITVN  
LDEDSKLTVCVKKSTLSNIIVLNEDEESSRYKSYGLKKI I SSNNGLVSQENEEATSQGGKRSNIPLTDIKEEGQLD  
SEKLTLPQHSGSKRGASGPLVTSSDEEESLPPSPRSSVNSSSSVQHAYEHDHDYENVASPSGSSTASGPVYIRPPG  
FRHHAQEIKKVKKKKTTEFDKFSALKKRAPTPPKVRPKRESVPMRLRALPQSFWKQPNVNPVSPAPLFPPLPL  
GSKDSSEDITDMRPITPPDEKERHKKQPKQSERKVIITGDTDLLLKHFLDRAVEDKKNPQIKRGRPRKIAVPRET  
GTKALISGDDPYLDAVDTQKLFQLSLESRQGIQSTTLQLVTLRDLGDKSVTLPSLSIEQNYSQLSDLAMNI  
PMRLRALPQSFWKQP

rs:XP\_020324580 [XP\_020324580] transcriptional coactivator YAP1  
[Oncorhynchus kisutch]. 45..59

MDPSQHNPPAGHQI IHVVRGDSETDLEALFNAVMPKNTIVPPSVPMRMRKLPDSFFKPPPEPKSHSRQTS  
TDAGTAGAIAPHHVRAHSSPASLQLGAVSPLLGMVPAGAPPShLRQSSYEIPEDMPLPPGWEMAKTPSGQRYFLN  
HLDQSTTWLDRKALLQMNQAPPTSPVPVQQQNMIMPASGPLPDCWEQAVTSEGEVYYINHKNKTTSWLDRPLDP  
RLDPRLDPRYGLNQQRITQSGPSKQGGQLPSSPESRGMVGGSNQMRLLQQLQMEKERLRLLKHQELLRTRPQELALR  
TQLPVSMEQDGGTNPVSSPGMGQDARTMTTNSSDPFLNSGTYHSRDESTDSGLSMSSYSVPRTPDDFLNSVDEM  
DTGDALPVSMGTQPSRFPDYLDITPGTDVDLGTLESNDNAMEGEELMPSLQEQALSSDILNDMESVLAATKIDKES  
FLTWL PMRMRKLPDSFFKPP

rs:XP\_020331022 [XP\_020331022] transcriptional coactivator YAP1-like,  
partial [Oncorhynchus kisutch]. 45..59

MDPSQHNPPAGHXIVHVRGDSETDLEALFNAVMPKNTIVPASVPMRMRKLPDSFFKPPPEPKSHSRQAS  
TDAVTAGALAPHHVRAHSSPASLQLGAVSPLLGMVPAGAPPShNRQSSYEIPDDMPLPPGWEVAQTSPSGQRYFLN  
HLDQSTTWLDRKALLQMNQAPPTSPVPVQQQNMIMPAS PMRMRKLPDSFFKPP

rs:XP\_020331055 [XP\_020331055] protein **FAM181B** [Oncorhynchus kisutch].  
195..209

MAVQTAIMNSPFVNFVCFVMMMEYDMGQSLDGSPLSESEERGEYRETTRSLDGSPLSESEERGEYRETTR  
NLLSFIDSASSNIKLALDKPVKSKRKNVHRKYLQKQIKRCTGFISPTGNPAAAPGANKRKRKVS GFPTQTQTQIQPQ  
TQLQTQPSPFQQKPVHKRDGLQANLQTKSLAALFNSVKEPVKGERAKKPLRHRNLPPSFFTEPANTTTTSRVT  
STSGMFLGDLERGVGNPDFFDLLGPDYSNMLSDQDVQTRGLPSRIIDQDMFQTRGLPSRILQHQQTQDITDQVS  
PYDPHHLVGGFLYTEPWSTSSPSKKGAGEGVRTGPGTQTPLYCQSGEGVRTGPGTQTPLYCQSGEGVRTLNG  
PLRHRNLPPSFFTEP

rs:XP\_020333735 [XP\_020333735] transcriptional coactivator YAP1-like  
[Oncorhynchus kisutch]. 45..59

MDPSQHNPPAGHQI IHVVRGDSETDLEALFNAVMPKNTIVPPSVPMRMRKLPDSFFKPPPEPKSHSRQTS  
TDAGTAGAIAPHHVRAHSSPASLQLGAVSPLLGMVPAGAPPShLRQSSYEIPEDMPLPPGWEMAKTPSGQRYFLN  
PHRPAARAVSLLGMVLLALPHRTSDSRLMRSRGHALPRAEMAKTPSKILPNVSVQPCERPPV  
PMRMRKLPDSFFKPP

rs:XP\_020356794 [XP\_020356794] protein **FAM181A** [Oncorhynchus kisutch].  
125..139

MASTDSEVKTLLNFVNLAASSDIKAALDKSAPCRRSVDHRKYLQKQLKRFSQKYARMPRCHTHRSTESSI  
AKDVVNTSSEYSLETIHPSTTRINEKGGSDARDVENARMAQTPTVSDNSKQEQVPMRKRQLPASFWEEPRLAQT  
NTDYLQYGWKKSQGVIGINDVEKIKKAHEELTPSLIISNRSGSVEKEPLKLDVASHNVNVCGFPCPFQYHGHHVVFQ  
SHIVVPQSAVGLWGKATVAETETPDITHRHKNYTHVVVKPIPTKPTVPPSIFNVFGFI PMRKRQLPASFWEEP

rs:XP\_020320732 [XP\_020320732] transcriptional coactivator YAP1-like  
isoform X1 [Oncorhynchus kisutch]. 48..62

MDARQGCAPPVGGQIVHVRGDSQTDLEALFNSVMNPKTSALPPSSLPMRMRKLPDSFFRQPDPRSHSR  
QASSDGTIVGSLTPHHVRAHSSPASLPINALSAHQCMATQPLPDDVPLPPGWEMTKTPSGQCYFLNHLDDQTTW  
HDPRLSHLQTNAAAHLASAPPHTHTLAHPANTHTQSNTGSNTGPLPEGWEQAVTPEGEVYYINHITKTTSWLD  
PHLVQSAVAQVKPSTLTSDPVGIATVVTKRRQQQLQVEKDRLRRKQQDLARPIRVQCNPQDVAVRSGLEHDGKMR  
NNHVDPALNGAHSRQSTDSGLSVSSFTTRTPDDLLNTVELMDTGDSGAGQPMFAFLEAGPGVCMATDGEELMPSIQ  
EALSSDLLSDMDTVLWL PMRMRKLPDSFFRQP

rs:XP\_020320734 [XP\_020320734] transcriptional coactivator YAP1-like  
isoform X2 [Oncorhynchus kisutch]. 48..62

MDARQGCAPPVGGQIVHVRGDSQTDLEALFNSVMNPKTSALPPSSLPMRMRKLPDSFFRQPDPRSHSR



QASSDGTIVGSLTPHHVRAHSSPASLPINALSAQHQCMTQPLPDDVPLPPGWEMTKTPSGQCYFLNHLDDQTTW  
HDPRLSHLQTNAAAHLLSAPPPHTHTLAHPAPNTHHTQSNTGSNTGPLEGWEQAVTPEGEVYYINHITKTTSWLD  
PHLVQSAVAQVKPSTLTSDPVGVIATVVTKRRQQQLQVEKDRLRRKQQDLARP IRVQDVAVRSGLEHDGKMRNNHVD  
PALNGAHSRNQSTDSGLSVSSFTTRTPDDLLNTVELMDTGDSGAGQPMAFLEAGPGVCMATDGEELMPSIQEALSS  
DLLSDMDTVLWL PMRMRKLPDSFFRQP

rs:XP\_020500920 [XP\_020500920] protein **FAM181A** [Labrus bergylta].  
105..119

MANADSEVKTLNLFVNLAASSDIKAALDKSAPCRRSVDHRKYLQKQLKRFSQKYSRVPRCHTHRSAGYGC  
VKPVGTAHQTVKVAEKASSSDAQGVESGSAVEQVPMRKRQLPASFWEEPKLTONEREHPLFKLKKNP TGTEGS  
ENEKNKRSYDDGKAALSEEKETLKLGLSSHCVSVCGCCPFQYHGHQVLHSHIVVPHPLGLWSKAAGTVTERPE  
HPYGQKIHTHVVKPIPTKPTVQSPIFSVFGFI PMRKRQLPASFWEEP

rs:XP\_020508661 [XP\_020508661] transcriptional coactivator YAP1-like  
isoform X1 [Labrus bergylta]. 50..64

MDAHRGGGGGAPPAGQQIVHVRGDSQTELEALFSAVMNPSKSARQPSSLPMRMRKLPDSFFRQPDSRGH  
SRQASSDGGVCGSLTPHHVRAHSSPASLPVNSLSTQAADVAVTPIIPDDVPLPHGWEMAKTPTGQRYFLNHLDKT  
TTWHDPRLSQLQSAAAQHPI SGAPIHAHSLSNPAPTSQPPNINQDTGPLEGWEQAVSADGEVFIYIDHINKSTAW  
VDPRLAQKMNPALGLLALQQRQEKERLRCKQQGLPPQITAQEAGGRNQMPGGMDHNRNAQTLVPSLDLIRIRASNH  
EPTLNGAHSRNESTDSGLSVSSLPRTSDHMLSSVDHMDTGDSGETSMTLQESMPVLPMSDGEELMPCIP EGLSSD  
LLMDMETVLSGSHMDRDSLTLWL PMRMRKLPDSFFRQP

rs:XP\_020508662 [XP\_020508662] transcriptional coactivator YAP1-like  
isoform X2 [Labrus bergylta]. 50..64

MDAHRGGGGGAPPAGQQIVHVRGDSQTELEALFSAVMNPSKSARQPSSLPMRMRKLPDSFFRQPDSRGH  
SRQASSDGGVCGSLTPHHVRAHSSPASLPVNSLSTQAADVAVTPIIPDDVPLPHGWEMAKTPTGQRYFLNHLDKT  
TTWHDPRLSQLQSAAAQHPI SGAPIHAHSLSNPAPTSQPPNINQDTAQKMNPALGLLALQQRQEKERLRCKQQGL  
PPQITAQEAGGRNQMPGGMDHNRNAQTLVPSLDLIRIRASNEPTLNGAHSRNESTDSGLSVSSLPRTSDHMLSSV  
DHMDTGDSGETSMTLQESMPVLPMSDGEELMPCIP EGLSSDLLMDMETVLSGSHMDRDSLTLWL  
PMRMRKLPDSFFRQP

rs:XP\_020446464 [XP\_020446464] protein **FAM181A** [Monopterus albus].  
102..116

MADSEVKTLNLFVNLAASSDIKAALDKSAPCRRSVDHRKYLQKQLKRFSQKYSRVPRCHTHRSAEYGC  
PMGTVQHSVKVAEKASDAQDVENMGSAVEQLPMRKRQLPASFWEEPKLTONEREHPLFKLKKNP TGTEGS  
KRKRSYDEDTKVTL SAPSRIFADKETLKLDLTSHHCVSVCSCC PFQYHGHQVLHSHIVVPHPLGLWSKAAGTE  
TGRPEHSFGQKIHTHVVKPIPTKPTVQSPIFSVFGFI PMRKRQLPASFWEEP

rs:XP\_020454162 [XP\_020454162] transcriptional coactivator YAP1-like  
isoform X1 [Monopterus albus].>rs:XP\_020454163 [XP\_020454163]  
transcriptional coactivator YAP1-like isoform X1 [Monopterus albus].  
46..60

MDAHRGAPPAGQQVVHVRGDSQTELEALFNAVMPGKAGKQPASLPMRMRKLPDSFFRQPDPGRGHSRQA  
SSDGGVCSSTLTPHHVRAHSSPASLPVNSLSTQAADVAVTPNIPDDVPLPHGWEMAKTPTGQRYFLNHLDKT  
DPRLSQLQSAPAQLPI SGAPVHAHSLSNPAPATQPQNINPETGPLEGWEQAVTADGEVYYIDHINKTTTWVDP  
LAQKMNPSILGLVMQQRQEKERLRCKQGLPHQITAQDAGGRNQMLGGMDHNRNAQTLPTLDVIRIRASNHEPTLN  
GAHSRNESTDSGLSVSSLPSSDHMLSSVDHMDTGDSGETSSMSLQESMPVLPMSSEGEELMPCIPESLGS  
DLLMDMETVLSGSHMDRDTLLTLWL PMRMRKLPDSFFRQP

rs:XP\_020454164 [XP\_020454164] transcriptional coactivator YAP1-like  
isoform X2 [Monopterus albus]. 46..60

MDAHRGAPPAGQQVVHVRGDSQTELEALFNAVMPGKAGKQPASLPMRMRKLPDSFFRQPDPGRGHSRQA  
SSDGGVCSSTLTPHHVRAHSSPASLPVNSLSTQAADVAVTPNIPDDVPLPHGWEMAKTPTGQRYFLNHLDKT  
DPRLSQLQSAPAQLPI SGAPVHAHSLSNPAPATQPQNINPETAQKMNPSILGLVMQQRQEKERLRCKQGLPHQIT  
AQDAGGRNQMLGGMDHNRNAQTLPTLDVIRIRASNHEPTLNGAHSRNESTDSGLSVSSLPSSDHMLSSVDHMDT  
GDSGETSSMSLQESMPVLPMSSEGEELMPCIPESLGS DLLMDMETVLSGSHMDRDTLLTLWL  
PMRMRKLPDSFFRQP

rs:XP\_020470406 [XP\_020470406] transcriptional coactivator YAP1 [Monopterus albus]. 45..59  
MDPSQHNPAGHQIVHVRGDSETDLEALFNAMVNPKNITVPPSVPMRMRKLPDSFFKPPPEPKPHSRQAS  
TDAGSGGALTPHHVRAHSSPASLQMGTVSGGSLSGMTSAGASPOHLRQSSYEIPDDMPLPPGWEMAKTASGQRYF  
LNHIDQTTTWDPRKALLQMNQAAPASSVPVQQQNLMPASGPLPDGWEQAVTSEGEIYYINHKNKTTSWLDPRL  
DTHYALNQQRISQSAPVKQGGQLPSSTHSGVMGSNNQMRLOQIEKERLRLKQOELLRQRPQELALRNQLPSSMDQ  
DGSTNPVSSPMAQDARTMTANSSDPFLNSGTYHSRDESTDSGLSMSSYSVPRTPDDFLNSVDEMDTGDPLPPSMA  
TQPSRFPDYLDIIPGTDVLDLGTLESDSMAVEGEELMPSLQEQALSSDILNDMESVLAATKIDKESFLTWL  
PMRMRKLPDSFFKPP

rs:XP\_020470443 [XP\_020470443] protein **FAM181B** [Monopterus albus]. 155..169  
MAVQTAIMNPQFMNFCFPGSVMEYDVEKSLDVSLGAEENDEYKETTCDLLSFIDSASSNIKLALDKP  
VKSKRKVNHRKYLQKQIKRGTGIIITPGNVEEVPVKRQGSPLAQSSPLQSKTLPKRDGVQANLQSKSLAALFSPVK  
DIRGEKAKKPLRHRNLPPSFFTEPANCSKVSSTSGMTLKDRLERGNPEAIEFFELLGPDYSNMVSDQDPYQSMPL  
RGQPDMGGPDPTSYDAHHLVGGLLYSEPWTNCSGASKKLGDSLRTGPAQPPLYCHSEAATGPLEDNTLCTLAFFN  
FFTDCSIPQVTYDLSGSYNRANYSSL PLRHRNLPPSFFTEP

rs:XP\_020608389 [XP\_020608389] transcriptional coactivator YAP1-like [Orbicella faveolata].>rs:XP\_020608390 [XP\_020608390] transcriptional coactivator YAP1-like [Orbicella faveolata]. 47..61  
MERKNSNCVVHVRQDSDNDLEALFHVVNKNNAKTHPDPTSSANSPLMRLRKLPPSFFKQPPLDGTLSF  
DQDPTGLISHSRAHSSPASLTVPSTLKGPHLSLSPVVHQRSTSFNDTALLEEPAQMPPGWEMRTTPNGQRYFMNH  
FDQVTTWQDPRKTQSTSNLNSIQPAGNLPDGWEQAITEGDIYYINHIERTTSWVDPRIAMHCRNQENMRGPQLP  
PEMNRHRMTQQLRQLREREHLLKRQOELLKQEIIRLKRDIIEEGGTSKSLGNTREVSLLSAQDPPVTSGGHIRD  
ESFDSGLGMGGGNYQFHDVDMNDSQPMFDANYSKSDSSFRTEPGRRLPEILDSLPGTNVDLGVLEGTDNSSNMET  
DDLGVGLEFNSEFNDAVESVLISPTKIADNFLTWL PMRLRKLPPSFFKQP

rs:XP\_020610110 [XP\_020610110] uncharacterized protein LOC110048674 [Orbicella faveolata]. 147..161  
MKNSAEENTTTISLLNFVSNATNTLKFALDKPVKPKRKVNHRKYLQRQLKKGASSTTCTMSYESSWMSH  
GEVLDPVHLKPEQQQNSGERSSTKNSKENRAEKLQALEINTPAFNHEQGGKTRDIKRKQRI SDARFPEE I FSTP  
SQPLRKRNLPESEFWSEPSAKVSRQSVQATRHTASFTNNDLQRSELEMLDWRPELDDFIERWSEESDCASNNS  
SRPASLSDGSSVDPYSPYSDESENNLASMDEFFEQRVPFSDNSAKAEDFSAPSVRSYATSHTVNDIACNMQQN  
YSQRQATHASTCYGGNYGFSASKWSAANQTRASYFENGYNILS PLRKRNLPESEFWSEP

rs:XP\_020616320 [XP\_020616320] uncharacterized protein LOC110054284 [Orbicella faveolata]. 106..120  
MDPLRKRTQQKDTLNRSPSPCGPSSPQSPPLVVRGKSLSLNRVAAPALLSPIRETGAKELSKRGRK  
QRLLLSQAGNLTLLKRETSPDFNKLEARLKPKRGLPMPMRALPQSFQEPKDIQNSSMSTEGTLSSLPPLFHNA  
NNTSYDVSKVRPVTPEEKYLPRPPKEPKLVITSPQEQLLKLFETVEEDKTKKFVIRGRPRRVQSDLTHCQLPK  
LEEDPCMMDSLAEKMFQLSLENSNKQTTGANTSLSCVSIHEGDKSVTLPSLNVEQNYSQLSEIWAHF  
PMRMRALPQSFQEP

rs:XP\_020657878 [XP\_020657878] protein **FAM181A** [Pogona vitticeps].>rs:XP\_020657879 [XP\_020657879] protein **FAM181A** [Pogona vitticeps]. 137..151  
MASADSEVKTLNLFVNLAASSDIKAALDKSAPCRRSVDHRKYLQKQLKRFSQKYSRLPRCHHHHMQPQPP  
PPPVKERKAAEARTRGLAAADGAEVSAGRSASATPRGDKAAEPVGEAHPRQPQSAEATPRPDQVPMRKRQLP  
ASFWEEPRTATGPLSVNGVLFPTNASPPPPPPPLKDSPLYERKKSCKGADSDGTGSAAESPQNEPDRGAVKVLS  
AWSCCPFYHRPQASPGAYPPPLAAALPPAAPYSTLGLWRKNVACPTGEAFCCKPDGSGAGQKVHRPVVWKP IPT  
KPAAPPPIFSVFGYI PMRKRQLPASFWEEP

rs:XP\_020668160 [XP\_020668160] histone-lysine N-methyltransferase SETD1B [Pogona vitticeps]. 224..238  
MAAGVIQSLSKFRLAPGFQHLFLSSTTSQEMALHDSSEEEEMEEEEEEEEEEEEVEGGGGGRGEEMEATD  
DDPEGHGPRGKQETPTVAADLSGAEMTAQLLRFAERVSEDIQRYFGRKSDDDSEACNIYEDRGSPLSGRLLYY  
TDLVQISQSRAPPEEDNEDEDLPPASTPTWRSLGSKAEEDERLGPLAELEFYALCRYAKPQALHDPEKLRMERKY  
GHLSPMHGRKLPQSFQWKEPAFSPIGVLGNSPPDFSDLLANWTSETSQEELHASPMHGRKLPQSFQWKEP

rs:XP\_003398315 [XP\_003398315] transcriptional coactivator YAP1 [Bombus terrestris]. 46..60

MALNQDQVDQLSKSNLVVNIQNSESDLQALFDSVLKPDSCRPLQVPLRMRNLPDSFFNPPSTGSKSPSI  
SHSRENSADSAFGTAAAVAGAGPAPGGNATGTSGTGAAGAATGGSGNTAAGTGSNAAGAAAAAVAAAAAGLTV  
HPRAHSSPASLQOQTYASAQAPQHPARHRRHHQKQRSYDVIISTVDDLGLPLPHGWQARTPEGGIYFLNHLTR  
TTTWEDPRKTAANVAVAVAVDNGKSSTGATNSLGLPLPDGWEQARTPEGEIYFINHQTRTTSWFDPRIPTHLO  
RAPTSGAMLPQNWLQQOQPTGGGIQSNQTLQACQOKLRLQSLQMERERLQKQOQEIIRQOELMLRQSTTDAAMD  
FLSGINEQHARQESADSLGLGSAYSPLPHTPEDFLANIDDNMDGTSDDGAPMETPDLSTLSDNIDSTDDLVP  
LSEDFSSDILDDVQSLINPNTTKPENVTWL P L R M R N L P D S F F N P P

rs:XP\_020731593 [XP\_020731593] protein **FAM181A** [Odocoileus virginianus texanus].>rs:XP\_020731594 [XP\_020731594] protein **FAM181A** [Odocoileus virginianus texanus]. 130..144

MASDSVDMKLLNFVNLASSDIKAALDKSAPCRRSVDHRKYLQKQLKRFSQKYSRLPRGLPGRGAEPHLR  
RGPEDRPRPLPLESGHGSSPGGGGCKEKALGNPDREESLSKERTLHGPDPGAARPGQVPMRKRQLPASFWEEP  
RPTHSPVGLGGLGREGPPYEGKKHCKGLEPLGPETAPVPASPRALAEKEPLKMPGVSLVGRVSAWCCPFQY  
HGQPVYPSPPGALPQSPMPSLGLWRKSAASPGELAHFCKDAEGPGQKVYRPVVLKPIPTKPAVPPPIFNVFGYL  
P M R K R Q L P A S F W E E P

rs:XP\_020775228 [XP\_020775228] protein **FAM181A** [Boleophthalmus pectinirostris]. 129..143

MSANGPAKLRTRGEREIRGMVETYVLWTEFIKLNMAADSEVKTLNLFVNLASSDIKAALDKSAPCRRSV  
DHRKYLQKQLKRFSQKYSRVPKCHHRPAEHGKPGGSAHESVKGRAQDAENVGNAVEQVPMRKRQLPASFWEEP  
LSQDRKENSISGFKKSADWADKRTRACEDVAKASASSSTRDKDALLDLTSHHCVSVCGCCPLQYHGQQVLHSHI  
VVPHPPLGLWSKAARTDAEMSEHPYGHKIHTHVVKPIPTKPTIQSPIFSVFGFI P M R K R Q L P A S F W E E P

rs:XP\_020778634 [XP\_020778634] transcriptional coactivator YAP1-like isoform X1 [Boleophthalmus pectinirostris]. 46..60

MDGHYGAPPAGQVVHVRGDSQTELEALFNAVMPNSKAQRQPTSVPMKDRKLPKSFFFTQPEPRGHSRQA  
SSDGGVSNLTPPRHVRAHSSPAIIPQADVTTAPIIPDDIPLPHGWEMAKTPTGQRYFLNHVDKTTTWHDPRLAQ  
HQTAAPQHPLSAVPPSHSHLSNPAPSVPQININPETGPLPEGWEQAVTGDGEVYIDHINKITTWVDPRLAKM  
NPGLLSLAIQQRQENERLRCKQOVTTQDAAVRNRMPPGGMDHNRNTQTLVPPLDVIRIRASNHEPTLNGAHSRNE  
DSGLSVSSLPRTEHMLSPVDHMDTGDSGESSLTLQESMPPVLPMSSEGDELMGLSSDLLMDMETVLSGSHMDR  
SLLTTL P M K D R K L P K S F F T Q P

rs:XP\_020778635 [XP\_020778635] transcriptional coactivator YAP1-like isoform X2 [Boleophthalmus pectinirostris]. 46..60

MDGHYGAPPAGQVVHVRGDSQTELEALFNAVMPNSKAQRQPTSVPMKDRKLPKSFFFTQPEPRGHSRQA  
SSDGGVSNLTPPRHVRAHSSPAIIPQADVTTAPIIPDDIPLPHGWEMAKTPTGQRYFLNHVDKTTTWHDPRLAQ  
HQTAAPQHPLSAVPPSHSHLSNPAPSVPQININPETGPLPEGWEQAVTGDGEVYIDHINKITTWVDPRLGK  
MNPGLLSLAIQQRQENERLRCKQOVTTQDAAVRNRMPPGGMDHNRNTQTLVPPLDVIRIRASNHEPTLNGAHSRNE  
TDSGLSVSSLPRTEHMLSPVDHMDTGDSGESSLTLQESMPPVLPMSSEGDELMGLSSDLLMDMETVLSGSHMDR  
DSLLTTL P M K D R K L P K S F F T Q P

rs:XP\_020778636 [XP\_020778636] transcriptional coactivator YAP1-like isoform X3 [Boleophthalmus pectinirostris]. 46..60

MDGHYGAPPAGQVVHVRGDSQTELEALFNAVMPNSKAQRQPTSVPMKDRKLPKSFFFTQPEPRGHSRQA  
SSDGGVSNLTPPRHVRAHSSPAIIPQADVTTAPIIPDDIPLPHGWEMAKTPTGQRYFLNHVDKTTTWHDPRLAQ  
HQTAAPQHPLSAVPPSHSHLSNPAPSVPQININPETAKMNPGLLSLAIQQRQENERLRCKQOVTTQDAAVRN  
MPGGMDHNRNTQTLVPPLDVIRIRASNHEPTLNGAHSRNESTDSGLSVSSLPRTEHMLSPVDHMDTGDSGESSL  
TLQESMPPVLPMSSEGDELMGLSSDLLMDMETVLSGSHMDRDSLLTTL P M K D R K L P K S F F T Q P

rs:XP\_020784177 [XP\_020784177] transcriptional coactivator YAP1 [Boleophthalmus pectinirostris]. 46..60

MEQQQHNPAGQKVVVHVRGDSQTELEALFNAVMPNPKSTIMPVPMRLRKLKLPDSFFKPPPEPKSHSRQA  
STDAGSGATQAPHHVRAHSSPANLQLGAGSTGSLSGIGSAGASPQHLRQSSYEIPDDVPLPPGWEMAKTASGQRY  
FLNHIEQTTTWDPRKALLQLNQAPAPTSTVPVQQNLMPATGPLPDGWEQAITSEGEIYYINHKNTTSLWLDPR  
LDPFRGLNQQRISQSAPVKPTGQLPPHSVAVMGGNNQMLRQQLLEKERLRLKQOELLRQRPQELALRNQLPMDQDGG  
SNPVSSPMAQDTRTMTANSSDPFLNSGTYHSRDESTDSGLSMSSYSVPRTPDDFLNSVDEMDTGEPPQQTSMVSQP

SRFPDYLD AIPGTDVDLGTLESESMAVEGEELMPSLQEQALSSDIFNDMESVLTGKIDKENFLTWL  
PMRLRKL PDSFFKPP

rs:XP\_020784429 [XP\_020784429] protein **FAM181B** [Boleophthalmus  
pectinirostris]. 154..168

MNPQFLNFCFPGSVMEYDVEKSLDDGSILGEAEETEEDYKETT RDLLSFIDSASSNIKLALDKPVKSKRK  
VNHRKYLQKQIKRCTGIISPSNAAEPPPPVKRHGSPMAQTSSALHTKNLPKR DGVHANLQSKSLAALFSPVQDV  
RGGDKAKKPLRHRNLPPSFFTEPANCSRVSPTAGTMLKELERGNTEPVDFEFELLGPDYSSMVSEQDLYQTLFVR  
GHPEMGGLENASYDSQHLVGGLLYSTEPKLTNTQAPGFCHSDATSGPTEDGSLCTLAFPNFFTDCSI PQV TYDIS  
GAFSRPNYSSL PLRHRNLPPSFFTEP

rs:XP\_020897246 [XP\_020897246] uncharacterized protein LOC110236100  
[Exaiaptasia pallida]. 108..122

MEKSRQNFQNSNHLEWRDPKSPSPSPASPQSPSPSLEVRGKGLSLSRWKPVIKENAPRELSKKGKRGKQ  
RLLLSQNGGLSKLKRRETS PDFHLHHNEHRAKPKRDPLPMRMRALPQSFFHEPHEIXTSSLN SSSSTLPGLPPLFH  
NANNTGDDVSNLRPVTPEEKLKPRPPKERKVS YAATTSEDLLFKLFETVEEDKTKKFVIKGRPRRRVQSDLT PN  
MLPKLEEDPSMVENLANRLFQLSIEKKLKP HQQPSTLSLSCVSVQDGEKSVTLPSLSVDQNY SQMLLEIVA HF  
PMRMRALPQSFFHEP

rs:XP\_020902626 [XP\_020902626] transcriptional coactivator YAP1-like  
[Exaiaptasia pallida].>rs:XP\_020903682 [XP\_020903682] transcriptional  
coactivator YAP1-like [Exaiaptasia pallida]. 47..61

MTMERN SNQNCYLNVRTDSENDLEALFN VVQSASTTIANEPSSNSLPMKLRKLPPSFFKQPKGLDSNKL  
SPEDNTGLKISHSRAHSSPASLPIPTSSAGMYSIQPPSHTRTQSYDGTAFEEESQLPPGWEMRTSPSGQPYFMDHI  
QQITTWVDPKRTQSTNNLTSSNPLPDGWEQAITPEGEIYYINHLTRTTSWVDPRIAMAPCRTNPQQHPPQQGRRP  
PQQHKAMLERVQLEQEQLKQRQELQKQEILLKHG LLENGGSKSMLGNLVREAGLAQLAPQPD TTTTPNGHIRDES  
FDSGLGMNTGYSNTYNSDIDLNTGSDSQMF DANYN SKDTSSRNSSRLP DFFDNLPGTNVDFGTIEGESTPSAMDT  
DDLGVGLDLPTDMLNDVESVLT PNL SKMTDPNFLTWL PMKLRKLPPSFFKQP

rs:XP\_003356830 [XP\_003356830] LOW QUALITY PROTEIN: protein **FAM181A** [Sus  
scrofa]. 226..240

MLCIWRGAPDWPEGPPSSGDSSSIQPTRGLHNCLQPDHGARRPRGAWPRSAAGNLP GHLGRAPGPAPSV  
SSVAFPGAASRLQNSPSSWKAPCSGPLVMASDS DVKMLLN FVN LASSDIKAALDKSAPCRRSVDHRKYLQKQLKR  
FSQKYSRLPRGLPGRGAEPHLKRGPE DRPGRLPLDTGHNSSPSGGGCKEKASGNPYREESLPKEQTLHGQDPEA  
ARPGQVPMKRQLPASFWEEPQPTHSY PVGLEGGXGPREGPPYDGGKHKCKGLEPLGPETS PRAPAEKEPLKMPGV  
SLGGRVSAWSCCPFYHGQPIYPGPPGALPQGPVPSLGLWRKSSASPELAHFCKDAEGPGQKVYRPVVLKPIPT  
KPAVPPPIFN VFGYL PMRKRQLPASFWEEP

rs:XP\_003129763 [XP\_003129763] protein **FAM181B** [Sus  
scrofa].>tr:F1STW2\_PIG [F1STW2] SubName: Full=Family with sequence  
similarity 181 member B {ECO:0000313|Ensembl:ENSSSCP00000015818};  
221..235

MAVQAALLSTHPFV PFGFGGSPDGLGGAFGALDKGCCFEDEETGTPAGALLAGAEGGDVREATR DLLSF  
IDSASSNIKLALDKPGKSKRKVNHRKYLQKQIKRCSGLMGAAPCP PPSGATDTPAKRPLAAAGAQTVAVATHGK  
AAPRREASQAAAAASLQSRSLAALFDSL RHVPGGAESAGAAVAATAGGLGGAGAGGSGGDAAGTAGCPVVP GARK  
VPLRARNLPPSFFTEPSRAVSGGCGSPGPGVSLGDLEKGA EAVEFFELLGPDY CQGTEAGVLLAAEPLDVFP TGA  
AVVRGSPELEPGLFEPPPAMVGSLLYPEPWSAPGCPAPKKPPLAAPRGGLTLNEPLRPLYPAAPDSPGGEDG PGL  
LASFAPFFSDCALPPPPPPQVSYEYSAGYSRSAYSSLRWPDGVWEGAPGEEEEAPRD PLRARNLPPSFFTEP

rs:XP\_020918365 [XP\_020918365] LOW QUALITY PROTEIN: transcriptional  
coactivator YAP1 [Sus scrofa]. 86..100

MDPGQQQPPPPQAPQGGQPPAQP PPGQGGPPSGPGQPAPPGSQAATQXPPAGHQIVHVRGDSE TDLEAL  
FNAV MNPKTANVPQTVPMRLRKL PDSFFKPPPEPKSHSRQASTDAGTAGALTPQH VRAHSSPASLQLGAI SPGTLT  
PTGVVSGPAATPTAQHLRQSSFEIPDDVPLPAGWEMAKTSSGQRYFLNHIDQTTTWQDPRKAMLSQMNVTAPTSP  
PVQQNMMSASGPLPDGWEQAMTQDGEIYYINHKNKTT SWLDPRLDPRFAMNQRISQSAPVKQPPPLAPQSPQGG  
VMGGGSSNQQQMRLQQLQMEKERLRLKQOELLRQAMRNINPSTANSPKCQELALRSQLPTLEQDGGTQNPVSSP  
GMSQELRTMTTSSDPFLNSGTYHSRDESTDSGLSMSYSVPRTPDDFLNSVDEMDTGD TINQSTLPSQQNRFPD  
YLEAIPGTNVDLGTLEGDGMNIEGEELMPSLQEQALSSDILNDMESVLAATKLDKESFLTWL  
PMRLRKL PDSFFKPP

rs:XP\_021003463 [XP\_021003463] transcriptional coactivator YAP1-like [Parasteatoda tepidariorum]. 48..62

MSQQRDVIEQKQGHNKILRIRGDSETNLDDLFNAVMPKGNQAHQSKPMRSRNLPKSFFQQPERGSKSA  
SHSRESSTDNFTSSPPPQVVPQSNNNNNNRSAASPGISNSNNAVSPPPAHPNGLVINHPRAHSSPASLQQTYNAA  
QHQLHRQQSYDITDIIIMPAGWEMARTENGQRYFLNHLTKTTTWEDPRKNLSTGSLSSSSGVTSLSPSTSPASSL  
INLQLVNNLAQGGLPDGWEQATTPDNEIYYINHRTQTTSWYDPRLPPLQNTFPVVPILGYGAHSQSVLGLSSQQS  
QASAASVTTSLTAASNQTLQOQQOQLRLQRLQMERERLRLRQQEILRNSNLGNSSPTLNEYLMRKTLDQEEGVANS  
SSSNRHTDASQSNSTNLDPFISADADFHSRQESGDSGLGLSSNYSLPNTPEDYLMGMDEGTEDVLLDIAELNLEP  
IPGGALDMVPENMDSDDLEPSLHEELNPDILSDVEALLNKE SVMKWL PMRSRNLPKSFFQQP

rs:XP\_015911304 [XP\_015911304] transcriptional coactivator YAP1-like [Parasteatoda tepidariorum]. 47..61

MSQQQDVIEQKGTNQVHIRSDSETKLDLDFNAVHHPKDYVPPGTLPMLRLNLPSSFFQQPEKGSKSPS  
HSRESSADNTNYPTGPNPSQKQOTIPTQLPSGLQINHPRAHSSPASLQQGYSKSGPVSHQHLRQRSYGDLLDDNT  
PLPPGWEMAKTSAGQTYFLNHLTQTTTWVDPKRLTSGNMAASVNMQLGALPKGWEQATTLEGEVYFINHIDRT  
TSWLDPRI PAHLQNPPTVTAPTQMSVSAALQSQTSSQIPGANNVNLRLQPTQTIKLPSSIAAAAASLQOQQQQQ  
QQLQQQLRVQSLEMERELRLRQQEIMRQQEILLRQSLGKLTAAASPTGSTDLPVSTNLDLFLDGGTDFHSR  
QESADSGGLGPNYSLPHTPEDFLSNLDDVEDRQSNLGLDLQTNLDLGDNDMDTDDLVPSSLQEEELNADILSDVE  
ALLAANTKDNVLTWL PMRLRLNLPSSFFQQP

rs:XP\_021100619 [XP\_021100619] protein **FAM181A** isoform X1 [Heterocephalus glaber]. 167..181

MAAAGPESFRGGQPCTLLRAASPLQKAPSSWKAPCSGPLVMASD TDVKMLLN FVN LASSDIKAALDKSA  
PCRRSVDHRKYLQKQLKRFSQKYSRLPRGLPGRAAEPLRRGPQDRPGRALALHPGPDSSPGGGGGCKEKALGSPF  
GEECLSKEQNLQGPAAKPGQVPMRKRQLPASFWEEP RPTH SYAMGLEGG LGPRERSPYESKKNCKGLESMVPEA  
APGPMSPRALADKEPLKMPGVSLVGCVDASCCPFQYHRQPIYPGPPGALPPSPMPSLGLWRKSPALPPEQAHFCK  
KRVDGPGQKVYRPVVLKPIPTKPAMPPPIFNIFGYL PMRKRQLPASFWEEP

rs:XP\_021100626 [XP\_021100626] protein **FAM181A** isoform X2 [Heterocephalus glaber]. 158..172

MCGQPCTLLRAASPLQKAPSSWKAPCSGPLVMASD TDVKMLLN FVN LASSDIKAALDKSAPCRRSVDHR  
KYLQKQLKRFSQKYSRLPRGLPGRAAEPLRRGPQDRPGRALALHPGPDSSPGGGGGCKEKALGSPFGEECLSKEQ  
NLQGPAAKPGQVPMRKRQLPASFWEEP RPTH SYAMGLEGG LGPRERSPYESKKNCKGLESMVPEAAPGPMSPR  
ALADKEPLKMPGVSLVGCVDASCCPFQYHRQPIYPGPPGALPPSPMPSLGLWRKSPALPPEQAHFCKRVDGPGQK  
VYRPVVLKPIPTKPAMPPPIFNIFGYL PMRKRQLPASFWEEP

rs:XP\_004837100 [XP\_004837100] protein **FAM181A** isoform X3 [Heterocephalus glaber].>rs:XP\_004837105 [XP\_004837105] protein **FAM181A** isoform X3 [Heterocephalus glaber].>rs:XP\_004837102 [XP\_004837102] protein **FAM181A** isoform X3 [Heterocephalus glaber]. 127..141

MASD TDVKMLLN FVN LASSDIKAALDKSAPCRRSVDHRKYLQKQLKRFSQKYSRLPRGLPGRAAEPLR  
RGPQDRPGRALALHPGPDSSPGGGGGCKEKALGSPFGEECLSKEQNLQGPAAKPGQVPMRKRQLPASFWEEP RPT  
HSYAMGLEGG LGPRERSPYESKKNCKGLESMVPEAAPGPMSPRALADKEPLKMPGVSLVGCVDASCCPFQYHRQ  
PIYPGPPGALPPSPMPSLGLWRKSPALPPEQAHFCKRVDGPGQKVYRPVVLKPIPTKPAMPPPIFNIFGYL  
PMRKRQLPASFWEEP

rs:XP\_021121636 [XP\_021121636] LOW QUALITY PROTEIN: transcriptional coactivator YAP1-like, partial [Heterocephalus glaber]. 41..55

PPPAPAGHQIVHVQGDSETDLEALFNAVMPNKTASVPQTVPMRLRKLKLPDSFFKPPPEPKSHSRQASTDAG  
TAGALTPQHVG AHSSPASLQLGAI SPGTLP TPTGVVSGPAATPAAQHLHQASFEIPDDVPLPPGWEMTKTSSGQRY  
FLNHIDQTTTTWQDPRKAMLSQMNVT DPTNPPVQQLMNSAPGGLPDGWEQAITQDGEIYYINHKNKTTSWLDPR  
DXRFAMSQRISQSAPVKQPPPLPSQSPQEGVVGSNSNQOQMR LQQLXMEKERLRLKQOELLQOAMQINPSTA  
NSPKCQELALRSQ LPTLEQDGGTQNPLFLSGLMSQELRTMTTNSSDPFLNSGTYHSRDESTDSGLSMSSYSVPRTP  
DDFLNSVDEM TDGDTINRSTLPSQQNHFPDYLEAIPGTNVDLGTLEGDMNIEGEEELMPSLQEALSSDILNDMES  
VLDATKLDKKSFLTWL PMRLRKLKLPDSFFKPP

rs:XP\_004868338 [XP\_004868338] protein **FAM181B** [Heterocephalus glaber]. 214..228

MAVQAALLSTHPFVFPFGGGSPDGLGGAFGALDKGCCFEDDENGAPAGALLPGAEGGDVREATRDLLSF

IDSASSNIKLALDKPGKSKRKVNHRKYLQKQIKRCSGLMGGGPPSPGAADGPAKRPPALPCAPAVPTPAHGKAVP  
RREASQAAAAASLQSRSLAALFDSLRYVPGGAEPAGGAEAVRAQGHGGASAGGAGDAAGPAVSGSRKVPLRARN  
LPPSFFTEPSRAGGGGGGPGSGVSLGDLEKGAEEVEFFELLGPDYGAESEAGVLLAAEPLDAFPTGAAVLRGFL  
ELEPGLFEPPPPVIIVGNLLYPEPWSAQSCPPAKKPPLEAAPAGLTLNEALRPLYPAAADSPGVEDGPGPVAPFAP  
FFPDCALPQPHHQVSYDYSTGYSRTPYSSSLWRPDGVWDGAPGEEGLPRD      PLRARNLPPSFFTEP

rs:XP\_004870870 [XP\_004870870] transcriptional coactivator YAP1  
[Heterocephalus glaber].      85..99

MDPGQQPPPPQAPQGGQPPAQPAPGQGGPPSAPGQPAPPVVSQAAPQAPPAGHQIVHVRGDSETDLEALF  
NAVMNPKTANVPQTVPMRLRKLKLPDSFFKPPPEPKSHSRQASTDAGTAGALTPQHVRHSSPASLQLGAIISPGTLTP  
TGVVSGPAPTAAQHLRQSSFEIPDDVPLPAGWEMAKTSSGQRYFLNHIDQTTTWDPRKAMLSQMNVTAPTNPP  
VQQNLMNSASGPLPDGWEQAITQDGEIYYINHKNKTTSWLDPRLDPRFAMSQRISQSAPVKQPPPLASQSPQGGV  
VGGNSSSQQHQMLRQLQMEKERLRLKQOELLRQAMRNINPSTANSKQELALRSQLPTLEQDGGTQNPVSSPG  
MSQELRTMTTNSDPFLNSGTYHSRDESTDSGLSMSSYSVPRTPDDFLNSVDEMDTGDITINQSTLPSQQNRFPDY  
LEAIPGTNVDLGTLEGDMNIEGEDVQTPPAPRSPRRSQGGGARAVLCAAGWRDAGRAAAHANFSPCEPEYSSVT  
DPLAKIASADLTSEASSKHKRKTPEELAPRCG      PMRLRKLKLPDSFFKPP

rs:XP\_005506187 [XP\_005506187] protein **FAM181A** [Columba  
livia].>tr:A0A2I0MNP1\_COLLI [A0A2I0MNP1] SubName: Full=Family with sequence  
similarity 181, member A {ECO:0000313|EMBL:PKK31296.1};      107..121

MASDSEVKTLNLFVNLASSDIKAALDKSAPCRRSVDHRKYLQKQLKRFSQKYSRIPRCHPSKAPDPSPH  
GGAATDKVLRTAEELESALTGERVLQEQNPEASRPDQVPMRKRQLPASFWEEPRAQSLAARAFPSNPEGLPVSRD  
PPPYEGKSKSRSSDTASPEPPESALHTGEKDPASVTSGRVGPWTCCPFPCPRPGVYQPPGSLPPSPFLGLGLWR  
KSAATLPVEVPHFCKEADGTGQKLYRPVVLKPIPTKPAVPPPIFNVFGYL      PMRKRQLPASFWEEP

rs:XP\_012549101 [XP\_012549101] YAP65-like protein isoform X1 [Bombyx  
mori].>rs:XP\_028040849 [XP\_028040849] transcriptional coactivator YAP1  
isoform X1 [Bombyx mandarina].      44..58

MALNSDGEQKSNLVLVRVDQSDSVLQSLFDTVLKPDSCRPLQVPLRMRQLPKSFFNPPSTGSKSPSVSH  
SRENSADSAFGSSSATGTSTVSHSRAHSSPASLQQTYTAGQQSQQPPLHHQHTKQRSYDVGTHIPDDLGLPLPAGW  
EQARTPEGQIYYLNHITKTTTWDDPRKTLAAQNVANTVQHQAEEALLNQAQQTITNTATPAKSTSNTTTDPDLG  
PLPEGWEQATTAEGEIIYFINHAARTTSWFDPRIPQHLQRTPVGATGVAGGGWANASIQACQQKLRQLQSLQLERDR  
LKQRQOEIRLQOELMARQASSIVSSLASSTGAVASTELPLDPFLPGLTDHQRQESADSGLGMVAVPQSYMPHTPE  
DFLSGMDDRMDCTSEAGANMDSTDITLGDNIGSTDDLVPVSLQLNEFTNDILLDDVQSLINSTPSKPDNVLTWL  
PLRMRQLPKSFFNPP

rs:XP\_012549102 [XP\_012549102] YAP65-like protein isoform X2 [Bombyx  
mori].>rs:XP\_028040850 [XP\_028040850] transcriptional coactivator YAP1  
isoform X2 [Bombyx mandarina].      44..58

MALNSDGEQKSNLVLVRVDQSDSVLQSLFDTVLKPDSCRPLQVPLRMRQLPKSFFNPPSTGSKSPSVSH  
SRENSADSAFGSSSATGTSTVSHSRAHSSPASLQQTYTAGQQSQQPPLHHQHTKQRSYDVGTHIPDDLGLPLPAGW  
EQARTPEGQIYYLNHITKTTTWDDPRKTLAAQNVANTVQHQAEEALLNQAQQTITNTATPAKSTSNTTTDPDLG  
LPEGWEQATTAEGEIIYFINHAARTTSWFDPRIPQHLQRTPVGATGVAGGGWANASIQACQQKLRQLQSLQLERDRL  
KQRQOEIRLQOELMARQASSIVSSLASSTGAVASTELPLDPFLPGLTDHQRQESADSGLGMVAVPQSYMPHTPED  
FLSGMDDDRMDCTSEAGANMDSTDITLGDNIGSTDDLVPVSLQLNEFTNDILLDDVQSLINSTPSKPDNVLTWL  
PLRMRQLPKSFFNPP

rs:XP\_012549103 [XP\_012549103] YAP65-like protein isoform X3 [Bombyx  
mori].      44..58

MALNSDGEQKSNLVLVRVDQSDSVLQSLFDTVLKPDSCRPLQVPLRMRQLPKSFFNPPSTGSKSPSVSH  
SRENSADSAFGSSSATGTSTVSHSRAHSSPASLQQTYTAGQQSQQPPLHHQHTKQRSYDVGTHIPDDLGLPLPAGW  
EQARTPEGQIYYLNHITKTTTWDDPRKTLAAQNVANTVQHQAEEALLNQAQQTITNTATPAKSTSNTTTDPDLG  
LPEGWEQATTAEGEIIYFINHAARTTSWFDPRIPQHLQRTPVGATGVAGGGWANASIQACQQKLRQLQSLQLERDRL  
KQRQOEIRLQOELMARQASSIVSSLASSTGAVASTELPLDPFLPGLTDHQRQESADSGLGMVAVPQSYMPHTPED  
FLSGMDDDRMDCTSEAGANMDSTDITLGDNIGSTDDLVPVSLQLNEFTNDILLDDVQSLINSTPSKPDNVLTWL  
PLRMRQLPKSFFNPP

rs:XP\_012549104 [XP\_012549104] YAP65-like protein isoform X4 [Bombyx  
mori].>rs:XP\_028040852 [XP\_028040852] WW domain-containing transcription

regulator protein 1 isoform X4 [Bombyx mandarina]. 44..58

MALNSDGEQKSNLVLVRVDQSDSVLQSLFDTVLKPDSCRPLQVPLRMRQLPKSFFNPPSTGSKSPSVSH  
SRENSADSAFGSSSATGTSTVSHSRAHSSPASLQOQTYTAGQSQQPPLHHQHTKQRSYDVGTHIPDDLGLPLPAGW  
EQARTPEGQIYYLNHITKTTTWDDPRKTLAAQNVANTVQHQAEEALLNQNAQQTITNTATPAQHLQRTPVGATGV  
AGGGWANASIQACQQKRLRLQSLQLERDRLKQRQOEIRLQOELMARQASSIVSSLASSTGAVASTELPLDFPLPGL  
TDHQRQESADSGLMAVPQSYMPHTPEDFLSGMDDRMCTSEAGANMDSTDITLGDNIGSTDDLVPQLNEFT  
NDILLDDVQSLINSTPSKPDNVLTLW PLRMRQLPKSFFNPP

rs:XP\_012549105 [XP\_012549105] YAP65-like protein isoform X5 [Bombyx  
mori].>rs:XP\_028040853 [XP\_028040853] transcriptional coactivator yorkie  
isoform X5 [Bombyx mandarina]. 44..58

MALNSDGEQKSNLVLVRVDQSDSVLQSLFDTVLKPDSCRPLQVPLRMRQLPKSFFNPPSTGSKSPSVSH  
SRENSADSAFGSSSATGTSTVSHSRAHSSPASLQOQTYTAGQSQQPPLHHQHTKQRSYDVGTHIPDDLGLPLPAGW  
EQARTPEGQIYYLNHITKTTTWDDPRKTLAAQNVANTVQHQAEEALLNQNAQQTITNTATPAQHLQRTPVGATGV  
AGGGWANASIQACQQKRLRLQSLQLERDRLKQRQOEIRLQOELMARQASSIVSSLASSTGAVASTELPLDFPLPGL  
TDHQRQESADSGLMAVPQSYMPHTPEDFLSGMDDRMCTSEAGANMDSTDITLGDNIGSTDDLNEFTNDILL  
DDVQSLINSTPSKPDNVLTLW PLRMRQLPKSFFNPP

rs:XP\_021236669 [XP\_021236669] transcriptional coactivator YAP1 isoform  
X1 [Numida meleagris]. 84..98

MDPGQPQPQQPPQAAQPPAPQQAAPQPPGAVSGAPGGAAQPPGAGPPPAGHQIVHVRGDSETDLEALFN  
AVMNPKGANVPHTLPMRLRKLKLPDSFFKPPPEPKAHSRQASTDAGTAGALTPQHVRASHPASLQLGAVSPGTLTPS  
GVVTGPGAPSSQHLRQSSFEIPDDVPLPPGWEMAKTPSGQRYFLNHIDQTTTWQDPRKAMLSQMNVTAPTSPPVQ  
QNLMNASAGPLPDGWEQAMTQDGEIYYINHKNKTTSWLDPRLDPRFAMNQRISQSAPVKQPPPLAPQSPQGGVMG  
GSSSNQQQQMRLQQLQMEKERLRLKHQELLRQVRPQAMRNPSTANS PKHQELALRSQLPTMEQDGGSQNPVSSPG  
MSQELRTMTTNSSDPFLNSGTYHSRDESTDSGLSMSSYSVPRTPDDFLNSVDEMDTGDSISQSNIPSHQNRFPDY  
LEAIPGTNVDLGTLEGDMNIEGEEELMPSLQEQALSSDILNDMESVLAATKLDKESFLTWL  
PMRLRKLKLPDSFFKPP

rs:XP\_021236679 [XP\_021236679] transcriptional coactivator YAP1 isoform  
X2 [Numida meleagris]. 84..98

MDPGQPQPQQPPQAAQPPAPQQAAPQPPGAVSGAPGGAAQPPGAGPPPAGHQIVHVRGDSETDLEALFN  
AVMNPKGANVPHTLPMRLRKLKLPDSFFKPPPEPKAHSRQASTDAGTAGALTPQHVRASHPASLQLGAVSPGTLTPS  
GVVTGPGAPSSQHLRQSSFEIPDDVPLPPGWEMAKTPSGQRYFLNHIDQTTTWQDPRKAMLSQMNVTAPTSPPVQ  
QNLMNASAGPLPDGWEQAMTQDGEIYYINHKNKTTSWLDPRLDPRFAMNQRISQSAPVKQPPPLAPQSPQGGVMG  
GSSSNQQQQMRLQQLQMEKERLRLKHQELLRQVRPQELALRSQLPTMEQDGGSQNPVSSPGMSQELRTMTTNSSD  
PFLNSGTYHSRDESTDSGLSMSSYSVPRTPDDFLNSVDEMDTGDSISQSNIPSHQNRFPDYLEAIPGTNVDLGT  
LEGDMNIEGEEELMPSLQEQALSSDILNDMESVLAATKLDKESFLTWL PMRLRKLKLPDSFFKPP

rs:XP\_021236685 [XP\_021236685] transcriptional coactivator YAP1 isoform  
X3 [Numida meleagris]. 84..98

MDPGQPQPQQPPQAAQPPAPQQAAPQPPGAVSGAPGGAAQPPGAGPPPAGHQIVHVRGDSETDLEALFN  
AVMNPKGANVPHTLPMRLRKLKLPDSFFKPPPEPKAHSRQASTDAGTAGALTPQHVRASHPASLQLGAVSPGTLTPS  
GVVTGPGAPSSQHLRQSSFEIPDDVPLPPGWEMAKTPSGQRYFLNHIDQTTTWQDPRKAMLSQMNVTAPTSPPVQ  
QNLMNASAGPLPDGWEQAMTQDGEIYYINHKNKTTSWLDPRLDPRFAMNQRISQSAPVKQPPPLAPQSPQGGVMG  
GSSSNQQQQMRLQQLQMEKERLRLKHQELLRQVRPQELALRSQLPTMEQDGGSQNPVSSPGMSQELRTMTTNSSD  
PFLNSGTYHSRDESTDSGLSMSSYSVPRTPDDFLNSVDEMDTGDSISQSNIPSHQNRFPDYLEAIPGTNVDLGT  
LEGDMNIEGEEELMPSLQEQALSSDILNDMESVLAATKLDKESFLTWL PMRLRKLKLPDSFFKPP

rs:XP\_021236690 [XP\_021236690] transcriptional coactivator YAP1 isoform  
X4 [Numida meleagris]. 84..98

MDPGQPQPQQPPQAAQPPAPQQAAPQPPGAVSGAPGGAAQPPGAGPPPAGHQIVHVRGDSETDLEALFN  
AVMNPKGANVPHTLPMRLRKLKLPDSFFKPPPEPKAHSRQASTDAGTAGALTPQHVRASHPASLQLGAVSPGTLTPS  
GVVTGPGAPSSQHLRQSSFEIPDDVPLPPGWEMAKTPSGQRYFLNHIDQTTTWQDPRKAMLSQMNVTAPTSPPVQ  
QNLMNASAGPLPDGWEQAMTQDGEIYYINHKNKTTSWLDPRLDPRFAMNQRISQSAPVKQPPPLAPQSPQGGVMG  
GSSSNQQQQMRLQQLQMEKERLRLKHQELLRQELALRSQLPTMEQDGGSQNPVSSPGMSQELRTMTTNSSDPFLN  
SGTYHSRDESTDSGLSMSSYSVPRTPDDFLNSVDEMDTGDSISQSNIPSHQNRFPDYLEAIPGTNVDLGTLEGDM  
NIEGEEELMPSLQEQALSSDILNDMESVLAATKLDKESFLTWL PMRLRKLKLPDSFFKPP

rs:XP\_021236700 [XP\_021236700] transcriptional coactivator YAP1 isoform X5 [Numida meleagris]. 84..98

MDPGQPQPQQPPQAAQPPAPQQAAPQPPGAVSGAPGGAAQPPGAGPPPAGHQIVHVRGDSETDLEALFN  
AVMNPKGANVPHTLPMRLRKLKLPDSFFKPPPEPKAHSRQASTDAGTAGALTPQHVRHSSPASLQLGAVSPGTLTPS  
GVVTGPGAPSSQHLRQSSFEIPDDVPLPPGWEMAKTPSGQRYFLNHIDQTTTWQDPRKAMLSQMNVTAPTSPPVQ  
QNLNMSASAMNQIRISQSAPVKQPPPLAPQSPQGGVMGGSSSNQQQQMRLQQLQMEKERLRLKHQELLRQVRPQAM  
RNPSTANSAPKHQELALRSQLPTEQDGGSQNPVSSPGMSQELRTMTTNSSDPFLNSGTYHSRDESTDSGLSMSSY  
SVPRTPDDFLNSVDEMDTGDSISQSNIPSHQNRFPDYLEAIPGTNVDLGTLEGDGMNIEGEEELMPSLQEQALSSDI  
LNDMESVLAATKLDKESFLTWL PMRLRKLKLPDSFFKPP

rs:XP\_021236709 [XP\_021236709] transcriptional coactivator YAP1 isoform X6 [Numida meleagris]. 84..98

MDPGQPQPQQPPQAAQPPAPQQAAPQPPGAVSGAPGGAAQPPGAGPPPAGHQIVHVRGDSETDLEALFN  
AVMNPKGANVPHTLPMRLRKLKLPDSFFKPPPEPKAHSRQASTDAGTAGALTPQHVRHSSPASLQLGAVSPGTLTPS  
GVVTGPGAPSSQHLRQSSFEIPDDVPLPPGWEMAKTPSGQRYFLNHIDQTTTWQDPRKAMLSQMNVTAPTSPPVQ  
QNLNMSASAMNQIRISQSAPVKQPPPLAPQSPQGGVMGGSSSNQQQQMRLQQLQMEKERLRLKHQELLRQAMRNP  
TANSAPKHQELALRSQLPTEQDGGSQNPVSSPGMSQELRTMTTNSSDPFLNSGTYHSRDESTDSGLSMSSYSVPR  
TPDDFLNSVDEMDTGDSISQSNIPSHQNRFPDYLEAIPGTNVDLGTLEGDGMNIEGEEELMPSLQEQALSSDI  
ESVLAATKLDKESFLTWL PMRLRKLKLPDSFFKPP

rs:XP\_021236717 [XP\_021236717] transcriptional coactivator YAP1 isoform X7 [Numida meleagris]. 84..98

MDPGQPQPQQPPQAAQPPAPQQAAPQPPGAVSGAPGGAAQPPGAGPPPAGHQIVHVRGDSETDLEALFN  
AVMNPKGANVPHTLPMRLRKLKLPDSFFKPPPEPKAHSRQASTDAGTAGALTPQHVRHSSPASLQLGAVSPGTLTPS  
GVVTGPGAPSSQHLRQSSFEIPDDVPLPPGWEMAKTPSGQRYFLNHIDQTTTWQDPRKAMLSQMNVTAPTSPPVQ  
QNLNMSASAMNQIRISQSAPVKQPPPLAPQSPQGGVMGGSSSNQQQQMRLQQLQMEKERLRLKHQELLRQVRPQEL  
ALRSQLPTEQDGGSQNPVSSPGMSQELRTMTTNSSDPFLNSGTYHSRDESTDSGLSMSSYSVPRTPDDFLNSVD  
EMDTGDSISQSNIPSHQNRFPDYLEAIPGTNVDLGTLEGDGMNIEGEEELMPSLQEQALSSDI  
LNDMESVLAATKLDKESFLTWL PMRLRKLKLPDSFFKPP

rs:XP\_021236724 [XP\_021236724] transcriptional coactivator YAP1 isoform X8 [Numida meleagris]. 84..98

MDPGQPQPQQPPQAAQPPAPQQAAPQPPGAVSGAPGGAAQPPGAGPPPAGHQIVHVRGDSETDLEALFN  
AVMNPKGANVPHTLPMRLRKLKLPDSFFKPPPEPKAHSRQASTDAGTAGALTPQHVRHSSPASLQLGAVSPGTLTPS  
GVVTGPGAPSSQHLRQSSFEIPDDVPLPPGWEMAKTPSGQRYFLNHIDQTTTWQDPRKAMLSQMNVTAPTSPPVQ  
QNLNMSASAMNQIRISQSAPVKQPPPLAPQSPQGGVMGGSSSNQQQQMRLQQLQMEKERLRLKHQELLRQELALRS  
QLPTMEQDGGSQNPVSSPGMSQELRTMTTNSSDPFLNSGTYHSRDESTDSGLSMSSYSVPRTPDDFLNSVDEMDT  
GDSISQSNIPSHQNRFPDYLEAIPGTNVDLGTLEGDGMNIEGEEELMPSLQEQALSSDI  
LNDMESVLAATKLDKESFLTWL PMRLRKLKLPDSFFKPP

rs:XP\_021266772 [XP\_021266772] uncharacterized protein LOC110405637 [Numida meleagris]. 201..215

MHGAAAPRVSPGPGVSLRDTMAAGVIRPLAELQLPSPFPHGLLLPTRPEPDFDLPEEDEEEEEEEDE  
EDAAEESTGCSGPESAGPNAEESTLRLRLRFSELISCDIQRIFGRRGEEATGGHVSVPEDCSSPHSSPRNASPGHG  
ARGGQAQPEAALGGHGAHRLGPLAELFEYGVHRCLAPRAASGKTQRLERKYGHITPMHRRKLPPSFWRPEPGPGP  
ASLLHAGTPDFSDLLAHWTVEPGPELPGSGRELPPAPGHAELAEAPYSGL PMHRRKLPPSFWRPE

rs:XP\_021259375 [XP\_021259375] protein **FAM181A** [Numida meleagris].>rs:XP\_021259376 [XP\_021259376] protein **FAM181A** [Numida meleagris]. 127..141

MASDSEVKTLLNFVNLASSDIKAALDKSAPCRRSVDHRKYLQKQLKRFSQKYSRVPRCHPTKPPCEGPR  
RGAEDRARSCQPEVPDPGPHSAAATEKVLQAAEAESLAGEQVVPEQNPEASRPDQVPMRKRQLPASFWEEPRA  
QSI PARGFPTGPEGLPVPRDPPPFEGKSKRSQDTAGPESHDPALHAGEEPTGVLSGRVGAWTCCPFPCGPAV  
YQPPGTLPTTFFPGLGLWRKGTATLPAEAQPFCKEAEAGTGQKLYRPVVLKPIPTKPTIPPPPIFNVFGYL  
PMRKRQLPASFWEEP

rs:XP\_021346267 [XP\_021346267] uncharacterized protein LOC110445799 [Mizuhopecten yessoensis].>tr:A0A210QYT0\_MIZYE [A0A210QYT0] SubName: Full=Uncharacterized protein {ECO:0000313|EMBL:OWF53909.1}; 140..154



MTSVMSLPFLPEVGEPRNAVSSRPHDSETSNLLSFVDMASSNIKLALDKPSRSKRKVNHRKYLQKQLKR  
CGNSSTSHSEGRQVDIQGALCNGGQTKCSRKETTQIGLQIKSLQALFDPKTLHEKCCTDQTKPTSTTKVPLRKR  
NLPPSFFIEPASSLEGIDPDQVLQATENTHTDLQLCSDVTNHEFPADTLDSILGQTELOELLAGPWTDSIRDNFS  
MPCRDHSLDNCSPRSFSDSSDGMSSSASVSPGIPGQSSDWIANFLSQQTGNFQNSSMFADGYTSAQNPLIPIGDS  
RIGDVTDSQSLEDRLFIEQTFPGQTFSGSNGTPCDTPPLPTFPQAFCSASLQENFQNVYPWSDAQIQPCYTYL  
PLRKRNLPPSFFIEP

rs:XP\_021356127 [XP\_021356127] transcriptional coactivator YAP1-like  
isoform X1 [Mizuhopecten yessoensis]. 43..57

MSQDQTERKGTQVVHVREDSGSELDALFNAVMPKSGQSGQIPLMRNLPAFVKPPDQQRVPVQHMKG  
GSNDSTGGYPGHPSGVGPSQGNLQIAHMAHSSPASLQQTSTVTPQGPPQAPAHARQHSCDALLDNEPLPPGWE  
IAKMPDGQRYYLKQNPPDDIFNKASSPNSNHLTQSTTWQDPRKAVSTTALNSQQSPPSSQQSPNVSMQNLNLDL  
PQGWEQASTPEGDIYYINHHERTTSWYDPRIPERMRQARINSVGPQPGQRQMGQQLAPPPQHPQQNGGTQRSQQ  
ANLQFSKLQMEKERLRKRQEEIARQEMLLRAQMQAQQQLQQQQQQQQQDAIPVSQSINISQANEMTSVTDPFLLGQ  
TNSSDHSRQESTDSGVEGGMGTGTNYSMPRTPEDFLSNVDEMMDTQEGGHRQGDFFNNMDIGGNIGESGEPNMDSE  
DLVPSLQEDISNELLNDMENVLNSNKLEDNLLTTL PLRMRNLPAFVKPP

rs:XP\_021356128 [XP\_021356128] transcriptional coactivator YAP1-like  
isoform X2 [Mizuhopecten yessoensis]. 43..57

MSQDQTERKGTQVVHVREDSGSELDALFNAVMPKSGQSGQIPLMRNLPAFVKPPDQQRVPVQHMKG  
GSNDSTGGYPGHPSGVGPSQGNLQIAHMAHSSPASLQQTSTVTPQGPPQAPAHARQHSCDALLDNEPLPPGWE  
IAKMPDGQRYYLKQNPPDDIFNKASSPNSNHLTQSTTWQDPRKAVSTTALNSQQSPPSSQQSPNVSMQNLNLDL  
PQGWEQASTPEGDIYYINHHERTTSWYDPRIPERMRQARINSVGPQPGQRQMGQQLAPPPQHPQQNGGTQRSQQ  
ANLQFSKLQMEKERLRKRQEEIARQEMLLRAQMQAQQQLQQQQQQQQQDAIPVSQSINISQANEMTSVTDPFLLGQ  
TNSSDHSRQESTDSGVEGGMGTGTNYSMPRTPEDFLSNVDEMMDTQEGGHRQGDFFNNMDIGGNIGESGEPNMDSE  
DLVPSLQEDISNELLNDMENVLNSNKLEDNLLTTL PLRMRNLPAFVKPP

rs:XP\_021356129 [XP\_021356129] transcriptional coactivator YAP1-like  
isoform X3 [Mizuhopecten yessoensis]. 43..57

MSQDQTERKGTQVVHVREDSGSELDALFNAVMPKSGQSGQIPLMRNLPAFVKPPDQQRVPVQHMKG  
GSNDSTGGYPGHPSGVGPSQGNLQIAHMAHSSPASLQQTSTVTPQGPPQAPAHARQHSCDALLDNEPLPPGWE  
IAKMPDGQRYYLKQNPPDDIFNKASSPNSNHLTQSTTWQDPRKAVSTTALNSQQSPPSSQQSPNVSMQNLNLDL  
PQGWEQASTPEGDIYYINHHERTTSWYDPRIPERMRQARINSVGPQPGQRQMGQQLAPPPQHPQQNGGTQRSQQ  
ANLQFSKLQMEKERLRKRQEEIARQMLLRAQMQAQQQLQQQQQQQQQDAIPVSQSINISQANEMTSVTDPFLLGQT  
NSSDHSRQESTDSGVEGGMGTGTNYSMPRTPEDFLSNVDEMMDTQEGGHRQGDFFNNMDIGGNIGESGEPNMDSE  
DLVPSLQEDISNELLNDMENVLNSNKLEDNLLTTL PLRMRNLPAFVKPP

rs:XP\_021356130 [XP\_021356130] transcriptional coactivator YAP1-like  
isoform X4 [Mizuhopecten yessoensis]. 43..57

MSQDQTERKGTQVVHVREDSGSELDALFNAVMPKSGQSGQIPLMRNLPAFVKPPDQQRVPVQHMKG  
GSNDSTGGYPGHPSGVGPSQGNLQIAHMAHSSPASLQQTSTVTPQGPPQAPAHARQHSCDALLDNEPLPPGWE  
IAKMPDGQRYYLKQNPPDDIFNKASSPNSNHLTQSTTWQDPRKAVSTTALNSQQSPPSSQQSPNVSMQNLNLDL  
PQGWEQASTPEGDIYYINHHERTTSWYDPRIPERMRQARINSVGPQPGQRQMGQQLAPPPQHPQQNGGTQRSQQ  
ANLQFSKLQMEKERLRKRQEEIARQMLLRAQMQAQQQLQQQQQQQQQDAIPVSQSINISQANEMTSVTDPFLLGQT  
NSSDHSRQESTDSGVEGGMGTGTNYSMPRTPEDFLSNVDEMMDTQEGGHRQGDFFNNMDIGGNIGESGEPNMDSE  
DLVPSLQEDISNELLNDMENVLNSNKLEDNLLTTL PLRMRNLPAFVKPP

rs:XP\_021356131 [XP\_021356131] transcriptional coactivator YAP1-like  
isoform X5 [Mizuhopecten yessoensis]. 43..57

MSQDQTERKGTQVVHVREDSGSELDALFNAVMPKSGQSGQIPLMRNLPAFVKPPDQQRVPVQHMKG  
GSNDSTGGYPGHPSGVGPSQGNLQIAHMAHSSPASLQQTSTVTPQGPPQAPAHARQHSCDALLDNEPLPPGWE  
IAKMPDGQRYYLKQNPPDDIFNKASSPNSNHLTQSTTWQDPRKAVSTTALNSQQSPPSSQQSPNVSMQNLNLDL  
PQGWEQASTPEGDIYYINHHERTTSWYDPRIPERMRQARINSVGPQPGQRQMGQQLAPPPQHPQQNGGTQRSQQ  
ANLQFSKLQMEKERLRKRQEEIARQEMLLRAQMQAQQQLQQQQQQQQQDAIPVSQSINISQANEMTSVTDPFLLGQ  
TNSSDHSRQESTDSGVEGGMGTGTNYSMPRTPEDFLSNVDEMMDTQEGGHRQGDFFNNC PLRMRNLPAFVKPP

rs:XP\_021356132 [XP\_021356132] transcriptional coactivator YAP1-like  
isoform X6 [Mizuhopecten yessoensis]. 43..57

MSQDQTERKGTQVVHVREDSGSELDALFNAVMPKSGQSGQIPLMRNLPAFVKPPDQQRVPVQHMKG

GSNDSTGGYPGHPSGVGPSQGNLQIAHMRAHSSPASLQOTLSTVPPQPPQAPAHHARQHSCDALLDNEPLPPGWE  
IAKMPDGQRYLNLHTQSTTTWQDPRKAVSTTALNSQQSPPSSQQSPNVSMQNLNLDLPLQGWQASTPEGDIYYI  
NHHERTTSWYDPRIPERMROQARINSVGGPGQORQMGQQLAPPPQHPQONGGTQRSQQANLQFQSKLQMEKERLRK  
RQEEIARQEMLLRAQMQAQQQQLQQQQQQQQQDAIPVSQSINISQANEMTSVTDPFLLGQTNSSDHSRQESTDSGVG  
GMGTGTNYSMPRTPEDFLSNVDEMDTQEGGHRQGDFFNNMDIGGNIGESGEPNSNMDSEDLVPSLQEDISNELLNDM  
ENVLNSNKLEDNLLTTL PLRMRNL PASFWKPP

rs:XP\_021368712 [XP\_021368712] uncharacterized protein LOC110460234  
[Mizuhopecten yessoensis].>tr:A0A210Q2Y9\_MIZYE [A0A210Q2Y9] SubName:  
Full=Uncharacterized protein {ECO:0000313|EMBL:OWF43082.1}; 186..200  
MSTTLIELPPTTPKQHGGKKGAPGLITLSENQVIPVANIPLTPRAPQLNGAAKRGASGPVITTSDEESD  
GCSSPRSNISHNLSYQPKHQSSSQNHQHPQPPQSQQRAYEAYEHDHDYENVASPSGSSTASGPVYVRPPGFR  
HHAQEIKKTKKKKTALLEFRSSGLKRAPTPPKVRPKRESVPMRLRALPQSFWKQPNVNPQVSPANVFPSLPPLY  
YKESMEEITDVRPITPPEEREARQKKTLLQRPPERKLIIGDIDLKLNLFAGVNADEKKVQH I K RGRPRKVTVPK  
ATSTKTLISGDDPYLMETMTEKFFPQLTLESRQAHLGNTSLQLVTIRNGDKSVMLPSLSINQDYSQMLSELAMN  
I PMRLRALPQSFWKQP

rs:XP\_021535334 [XP\_021535334] protein **FAM181A** [Neomonachus  
schauinslandi].>tr:A0A2Y9GC40\_NEOSC [A0A2Y9GC40] SubName: Full=protein  
**FAM181A** {ECO:0000313|RefSeq:XP\_021535334.1}; 129..143  
MASDSVDMKLLNFVNLASSDIKAALDKSAPCRRSVDHRKYLQKQLKRFSQKYSRLPRGLPGRGAEPHLK  
RGPEDRPGRLPLDSGQDCSPGGGGCYKEKALGNPYREECLSRQTLQRQNPAAARPGQVPMRKRQLPASFWEEP  
PTHSYPLGLEGLGPREGPPYEGKKHCKGLEPLDPEMAPVPASPRALAEKEPLKMSGVSLVGRVNAWSCCPFOYH  
GQPIYAGHPGALPQSPVPSLGLWRKSPASPGELAHFCKDVGPGQKVYRPVVLKPIPTKPAVPPPIFNVFGYL  
PMRKRQLPASFWEEP

rs:XP\_021542175 [XP\_021542175] protein **FAM181B** [Neomonachus  
schauinslandi].>tr:A0A2Y9GWF6\_NEOSC [A0A2Y9GWF6] SubName: Full=protein  
**FAM181B** {ECO:0000313|RefSeq:XP\_021542175.1}; 221..235  
MAVQAALLSTHPFVFPFGGGSPDGLGGAFFGALDKGCCFEDDETGTTPAGALLAGAEGGDVREATRDLLESF  
IDSASSNIKLALDKPGKSKRKNVHRKYLQKQIKRCSGLMGAAPPGPSGAADAPAKRPLAAPGAQTVAVPPHGK  
AAPRREASQAAAAASLQSRSLAALFDSLRLHVPGGDERARGSVAAVAVAGLGGAGAGGSGDAAGPAGGTAVPGARK  
VPLRARNLPPSFFTEPSRAGGGGCGSPGVSGLDLEKGAEEVEFFELLGPDYGVGTEASVLLAAEPLDVFPPTGA  
AVLRGPPPELEPLGFEPPEPAMVGSLLYSESWSAPGCPPTKKPPLAAPRGGLTLNEPLRSLYPSAADSPPGEDAPGL  
LASFAPFFSDCALPPPPPPPHQVSYDYSAGYSRTAYSSLWRPDGVWEGAPGEEGAHRD  
PLRARNLPPSFFTEP

rs:XP\_021527383 [XP\_021527383] transcriptional coactivator YAP1 isoform  
X1 [Aotus nancymaae].>tr:A0A2K5DRN6\_AOTNA [A0A2K5DRN6] SubName:  
Full=Uncharacterized protein {ECO:0000313|Ensembl:ENSANAP00000023613};  
85..99  
MDPGQQPPPPQAAPQGGQPPAQPQQGQPPSAPGQPAPAATQAAPQAPPAGHQIVHVRGDSETDLEALF  
NAVMPNKTANVPQTVPMRLRKLPLDSFFKPPPEPKSHSRQASTDAGTAGALTPQHVRHSSPASLQLGAVSPGTLTP  
TGVVSGPAATPTAQHLRQSSFEIPDDVPLPAGWEMAKTSSGQRYFLNHIDQTTTWQDPRKAMLSQMNVTAPTSPP  
VQQNMMNSASGPLPDGWEQAMTQDGEIYYINHKNKTTSWLDPRLDPRFAMNQRISQSAPVKQPPPLAPQSPQGGV  
MGGSSSNQQQQMRLQQLQMEKERLRKQQLLQVVRPQAMRNINPSTANSKQELALRSQLEQDGGTQNPV  
SSPGMSQELRTMTTNSSDPFLNSGTYHSRDESTDSGLSMSSYSVPRTPDDEFLLNSVDEMDTGDITNQSTLPSQQNR  
FPDYLEAIPGTNVDLGTLEGDGMNIEGEELMPSLQELALSSDILNDMESVLAATKLDKESFLTWL  
PMRLRKLPLDSFFKPP

rs:XP\_021527384 [XP\_021527384] transcriptional coactivator YAP1 isoform  
X2 [Aotus nancymaae]. 85..99  
MDPGQQPPPPQAAPQGGQPPAQPQQGQPPSAPGQPAPAATQAAPQAPPAGHQIVHVRGDSETDLEALF  
NAVMPNKTANVPQTVPMRLRKLPLDSFFKPPPEPKSHSRQASTDAGTAGALTPQHVRHSSPASLQLGAVSPGTLTP  
TGVVSGPAATPTAQHLRQSSFEIPDDVPLPAGWEMAKTSSGQRYFLNHIDQTTTWQDPRKAMLSQMNVTAPTSPP  
VQQNMMNSASGPLPDGWEQAMTQDGEIYYINHKNKTTSWLDPRLDPRFAMNQRISQSAPVKQPPPLAPQSPQGGV  
MGGSSSNQQQQMRLQQLQMEKERLRKQQLLQVVRPQAMRNINPSTANSKQELALRSQLEQDGGTQNPVSSPG  
MSQELRTMTTNSSDPFLNSGTYHSRDESTDSGLSMSSYSVPRTPDDEFLLNSVDEMDTGDITNQSTLPSQQNRFPDY

LEAIPGTNVDLGTLEGDMNIEGEELMPSLQEQALSSDILNDMESVLAATKLDKESFLTWL  
PMRLRKLPSFFKPP

rs:XP\_021527385 [XP\_021527385] transcriptional coactivator YAP1 isoform  
X3 [Aotus nancymaae].>tr:A0A2K5DRL9\_AOTNA [A0A2K5DRL9] SubName:  
Full=Uncharacterized protein {ECO:0000313|Ensembl:ENSANAP00000023615};  
85..99

MDPGQQPPPQAAPQGGQPPAQQPPQGGQPPSAPGQPAPAATQAAPQAPPAGHQIVHVRGDSETDLEALF  
NAVMNPKTANVPQTVPMRLRKLPSFFKPPPEPKSHSRQASTDAGTAGALTPQHVRHSSPASLQLGAVSPGTLTP  
TGVVSGPAATPTAQHLRQSSFEIPDDVPLPAGWEMAKTSSGQRYFLNHIDQTTTWQDPRKAMLSQMNVTAPTSPP  
VQQNMMNSASGPLPDGWEQAMTQDGEIYYINHKNKTTSWLDPRLDPRFAMNQRISQSAPVKQPPPLAPQSPQGGV  
MGGSSSNQQQQMRLQQLQMEKERLRLKQQELLRQVRPQELALRSQLPTLEQDGGTQNPVSSPGMSQELRTMTTNS  
SDPFLNSGTYHSRDESTDSGLSMSSYSVPRTPDDFLNSVDEMDTGDTINQSTLPSQQNRFPDYLEAIPGTNVDLGT  
LEGDMNIEGEELMPSLQEQALSSDILNDMESVLAATKLDKESFLTWL PMRLRKLPSFFKPP

rs:XP\_021527389 [XP\_021527389] transcriptional coactivator YAP1 isoform  
X4 [Aotus nancymaae]. 85..99

MDPGQQPPPQAAPQGGQPPAQQPPQGGQPPSAPGQPAPAATQAAPQAPPAGHQIVHVRGDSETDLEALF  
NAVMNPKTANVPQTVPMRLRKLPSFFKPPPEPKSHSRQASTDAGTAGALTPQHVRHSSPASLQLGAVSPGTLTP  
TGVVSGPAATPTAQHLRQSSFEIPDDVPLPAGWEMAKTSSGQRYFLNHIDQTTTWQDPRKAMLSQMNVTAPTSPP  
VQQNMMNSASGPLPDGWEQAMTQDGEIYYINHKNKTTSWLDPRLDPRFAMNQRISQSAPVKQPPPLAPQSPQGGV  
MGGSSSNQQQQMRLQQLQMEKERLRLKQQELLRQELALRSQLPTLEQDGGTQNPVSSPGMSQELRTMTTNS  
LNSGTYHSRDESTDSGLSMSSYSVPRTPDDFLNSVDEMDTGDTINQSTLPSQQNRFPDYLEAIPGTNVDLGTLEG  
DGMNIEGEELMPSLQEQALSSDILNDMESVLAATKLDKESFLTWL PMRLRKLPSFFKPP

rs:XP\_021527395 [XP\_021527395] transcriptional coactivator YAP1 isoform  
X5 [Aotus nancymaae].>tr:A0A2K5DRP0\_AOTNA [A0A2K5DRP0] SubName:  
Full=Uncharacterized protein {ECO:0000313|Ensembl:ENSANAP00000023618};  
85..99

MDPGQQPPPQAAPQGGQPPAQQPPQGGQPPSAPGQPAPAATQAAPQAPPAGHQIVHVRGDSETDLEALF  
NAVMNPKTANVPQTVPMRLRKLPSFFKPPPEPKSHSRQASTDAGTAGALTPQHVRHSSPASLQLGAVSPGTLTP  
TGVVSGPAATPTAQHLRQSSFEIPDDVPLPAGWEMAKTSSGQRYFLNHIDQTTTWQDPRKAMLSQMNVTAPTSPP  
VQQNMMNSASAMNQRISQSAPVKQPPPLAPQSPQGGVMGGSSSNQQQQMRLQQLQMEKERLRLKQQELLRQVRPQ  
AMRNINPSTANSKPKCQELALRSQLPTLEQDGGTQNPVSSPGMSQELRTMTTNSSDPFLNSGTYHSRDESTDSGLS  
MSSYSVPRTPDDFLNSVDEMDTGDTINQSTLPSQQNRFPDYLEAIPGTNVDLGTLEGDMNIEGEELMPSLQEQAL  
SSDILNDMESVLAATKLDKESFLTWL PMRLRKLPSFFKPP

rs:XP\_021527398 [XP\_021527398] transcriptional coactivator YAP1 isoform  
X6 [Aotus nancymaae]. 85..99

MDPGQQPPPQAAPQGGQPPAQQPPQGGQPPSAPGQPAPAATQAAPQAPPAGHQIVHVRGDSETDLEALF  
NAVMNPKTANVPQTVPMRLRKLPSFFKPPPEPKSHSRQASTDAGTAGALTPQHVRHSSPASLQLGAVSPGTLTP  
TGVVSGPAATPTAQHLRQSSFEIPDDVPLPAGWEMAKTSSGQRYFLNHIDQTTTWQDPRKAMLSQMNVTAPTSPP  
VQQNMMNSASAMNQRISQSAPVKQPPPLAPQSPQGGVMGGSSSNQQQQMRLQQLQMEKERLRLKQQELLRQAMRN  
INPSTANSKPKCQELALRSQLPTLEQDGGTQNPVSSPGMSQELRTMTTNSSDPFLNSGTYHSRDESTDSGLSMSSY  
SVPRTPDDFLNSVDEMDTGDTINQSTLPSQQNRFPDYLEAIPGTNVDLGTLEGDMNIEGEELMPSLQEQALSSDI  
LNDMESVLAATKLDKESFLTWL PMRLRKLPSFFKPP

rs:XP\_021527399 [XP\_021527399] transcriptional coactivator YAP1 isoform  
X7 [Aotus nancymaae]. 85..99

MDPGQQPPPQAAPQGGQPPAQQPPQGGQPPSAPGQPAPAATQAAPQAPPAGHQIVHVRGDSETDLEALF  
NAVMNPKTANVPQTVPMRLRKLPSFFKPPPEPKSHSRQASTDAGTAGALTPQHVRHSSPASLQLGAVSPGTLTP  
TGVVSGPAATPTAQHLRQSSFEIPDDVPLPAGWEMAKTSSGQRYFLNHIDQTTTWQDPRKAMLSQMNVTAPTSPP  
VQQNMMNSASAMNQRISQSAPVKQPPPLAPQSPQGGVMGGSSSNQQQQMRLQQLQMEKERLRLKQQELLRQVRPQ  
ELALRSQLPTLEQDGGTQNPVSSPGMSQELRTMTTNSSDPFLNSGTYHSRDESTDSGLSMSSYSVPRTPDDFLNS  
VDEMDTGDTINQSTLPSQQNRFPDYLEAIPGTNVDLGTLEGDMNIEGEELMPSLQEQALSSDILNDMESVLAATK  
LDKESFLTWL PMRLRKLPSFFKPP

rs:XP\_021527400 [XP\_021527400] transcriptional coactivator YAP1 isoform  
X8 [Aotus nancymaae]. 85..99

MDPGQQPPQAAPOGQGGQPPAQPPQGGQPPSAPGQPAPAATQAAPQAPPAGHQIVHVRGDSETDLEALF  
NAVMPKNTANVPQTVPMRLRKLKLPDSFFKPPPEPKSHSRQASTDAGTAGALTPQHVRHSSPASLQLGAVSPGTLTP  
TGVVSGPAATPTAQHLRQSSFEIPDDVPLPAGWEMAKTSSGQRYFLNHIDQTTTWDPRKAMLSQMNVTAPTSP  
VQQNMMNSASAMNQRIQSAPVKQPPPLAPQSPQGGVMGGSSSNQQQMRLLQQLQMEKERLRLKQQLRQELAL  
RSQLPTLEQDGGTQNPVSSPGMSQELRTMTTNSSDPFLNSGTYHSRDESTDSGLSMSSYSVPRTPDDFLNSVDEM  
DTGDTINQSTLPSQQNRFPDYLEAIPGTNVDLGTLEGDGMNIEGEEMLPMSLQEQALSSDILNDMESVLAATKLDKE  
SFLTWL PMRLRKLKLPDSFFKPP

rs:XP\_021527473 [XP\_021527473] LOW QUALITY PROTEIN: protein **FAM181B**  
[Aotus nancymaae]. 218..232

MAVQAALLSTHFPVFPFGGGSPDGLGGAFGALDKGCCFEDDETGAPAGALLSGAEGGDVREATRDLLSF  
IDSASSNIKLALDKPGKSKRKNVNRKYLQKQIKRCSGLMGAAPPSPSAADTPAKRPLAAPGAPTVAAPAHGK  
AAPRREASQAAAAASLQXRSALALFDSLRLHVSQGAEPAGGAVLAPAAGLGAGGAGGDTAGPAGGAAVPGARKVPL  
RARNLPPSFFTEPSRGGGSGCGASGPDVSLGDLEKGAEEVEFFELLGPDYAGATEAAVLLAAEPLDVFVPGASVL  
RGPPELEPGLFEPSPSVVGNLLYPEPWSVPGCPPTKKPPLTAPARLDLALAPLYPAASDSPGGEDGPGHLASF  
APFFPDCALPPPPPPHQVSYDYSAGYSRTAYSSXWRPDGVWEGAPGEEGAHRDTEAPFPFPLETAMESAAPPGVA  
PKSKERWENARGDEAGF PLRARNLPPSFFTEP

rs:XP\_012308592 [XP\_012308592] protein **FAM181A** [Aotus nancymaae].  
129..143

MASDSVDMKLLNFVNLAASSDIKAALDKSAPCRRSVDHRKYLQKQKRFSSQKYSRLPRGLPGRAAESYLK  
RGPENRPGRLLLDLGPDSSPGGGGGCKEKVLRNCPREECLAKEQLPQGQHPEAARPGQVPMRKRQLPASFWEEP  
PTHSHYVGLGGLGPREGPPYEGKKNCKGLEPLGPETASGPMSPSALAEKESLKMPEVSLVGRVNAWSCCPFYH  
GQPIYPGPLGALPQSPVPSLGLWRKSPAFFPGELAHLCCKDADGLGQKVCPRMVLKPIPTKPAVPPPIFNVFGYL  
PMRKRQLPASFWEEP

rs:XP\_012309692 [XP\_012309692] protein **FAM181B**, partial [Aotus  
nancymaae]. 6..20

GARKVPLRARNLPPSFFTEPSRAGGSGCGSPGPDVSLGDLEKGAEEVEFFELLGPDYAGATEAAVLLAA  
EPLDVFVPGASVLRGPPELEPGLFEPSPSVVGNLLYPEPWSVPGCPPTKKPPLTAPRGGLTLNEPLRPLYPAASD  
SPGGEDGPGHLASFAFFPDCALPPPPPPHQVSYDYSAGYSRTAYSSLWRPDGVWEGAPGEEGAHRD  
PLRARNLPPSFFTEP

rs:XP\_009210433 [XP\_009210433] protein **FAM181A** isoform X1 [Papio anubis].  
268..282

MDIPAPRYRVLPRPPFPTGISAPPDLEGPPSLIPGDPGREGGGGGRGERERERERETETERQKERRRES  
ERERATQRSRTAGKAARPSLRPIVCPHWSMAAVGLESGLVSLVFLGAAGHQSSPSSWKASCSPVMASDS  
DVKMLLNFVNLAASSDIKAALDKSAPCRRSVDHRKYLQKQKRFSSQKYSRLPRGLPGRAPPEYLKRGSEDRPGRLL  
LDLGPDSSPGGGGGCKEKALRNYPYREECLAKEQLPQGQHPEAAQPGQVPMRKRQLPASFWEEP  
PTHSHYVGLGGLGPREGPPYEGKKNCKGLEPLGPEIVPVPMSPRALAEKEPLKMPGVSLVGRVNAWSCCPFYH  
GQPIYPGPLGALPQSPVPSLGLWKKSPAFFPGELAHLCCKDADGLGQKVCPRVVLKPIPTKPAVPPPIFNVFGYL  
PMRKRQLPASFWEEP

rs:XP\_003902250 [XP\_003902250] protein **FAM181A** isoform X2 [Papio  
anubis].>rs:XP\_003902249 [XP\_003902249] protein **FAM181A** isoform X2 [Papio  
anubis]. 129..143

MASDSVDMKLLNFVNLAASSDIKAALDKSAPCRRSVDHRKYLQKQKRFSSQKYSRLPRGLPGRAPPEYLK  
RGSEDRPGRLLLLDLGPDSSPGGGGGCKEKALRNYPYREECLAKEQLPQGQHPEAAQPGQVPMRKRQLPASFWEEP  
PTHSHYVGLGGLGPREGPPYEGKKNCKGLEPLGPEIVPVPMSPRALAEKEPLKMPGVSLVGRVNAWSCCPFYH  
GQPIYPGPLGALPQSPVPSLGLWKKSPAFFPGELAHLCCKDADGLGQKVCPRVVLKPIPTKPAVPPPIFNVFGYL  
PMRKRQLPASFWEEP

rs:XP\_003910531 [XP\_003910531] protein **FAM181B** [Papio  
anubis].>tr:A0A096NY93\_PAPAN [A0A096NY93] SubName: Full=Family with  
sequence similarity 181 member B {ECO:0000313|Ensembl:ENSPANP00000018054};  
221..235

MAVQAALLSTHFPVFPFGGGSPDGLGGAFGALDKGCCFEDDETGAPAGALLSGAEGGDVREATRDLLSF  
IDSASSNIKLALDKPGKSKRKNVNRKYLQKQIKRCSGLMGAAPPSPSAADTPAKRPLAAPSAPTVAAPAHGK  
AVPRREASQAAAAASLQXRSALALFDSLRLHVPVGGAEPAAGAVAAVAGLGGAGTGGAGGDAAGPAGATAVPGARK

VPLRARNLPPSFFTEPSRAGGGGCGPSGPDVSLGDLEKGAEEVEFFELLGPDYAGAGTEAAVLLAAEPLDVFPAGA  
SVLRGPPPELESGLFDPAPAVVGNLLYPEPWSVPGCPPTKKPPLTAPRGGLTLNEPLRPLYPAAADSFGGEDGPGH  
LASFSPFFPCALPPPPPPPHQVCYDYSAGYSRNAYSSSLWRPDAVWEGAPGEEGAHRD PLRARNLPPSFFTEP

rs:XP\_021913908 [XP\_021913908] uncharacterized protein LOC110827008  
isoform X1 [Zootermopsis nevadensis]. 235..249

MSGKRKPSPESSLTLISPNALLLSSPFCTYPFYGDDDRNSSKNNGGTSFLKLNQQKIRELTKSTKIVQR  
PQKQKAVLSTRSKTFDSIPPSLEVNNNPFPPSSSPFDYDSVHSPGGVSNASSEGPTYVVRTPGFEHHAQEFEIQRK  
RQQCSKSHAPFASRVDEQLSCNDQDAACQGEHVRSSSKASQNGSVSNATSKKKKSVVFGTSDGKHETEAVKKTDP  
SQQTTSKHKPKKEPLPMKLRALPQSFWQQPNNTNSLSPGAVYPVLPPLSSFGAAKDDVESVAAGVVRSTSPPEDGL  
HPLREVSANTDLLFSLFRGIEEEQPRVTVVRRGRPKKPPSTVLTRVLRDDDPCLVSAVTESILPLIPDRGTGSGS  
HASRLAQGQQLAMVSLKDGDKSLSLPSLNVEHNYSQILSELVIKL PMKLRALPQSFWQQP

rs:XP\_021937265 [XP\_021937265] transcriptional coactivator YAP1 isoform  
X1 [Zootermopsis nevadensis]. 45..59

MALNPDSEQHKGNLVVTIDEDSDSDLQALFDSVLKPDSCRPLQVPLRMRKLPNSFFNPPSTGSKSPSVS  
SISHSRENSADSAFGTASVGAGPGGTTTTSAAGANGLQVNHPRAHSSPASLQQTYSASAQQQHHGLKQRSYDITT  
VDELGPLPPGWEQARTREGQVYYLNHITRTTTTWEDPRKTLAAQVAQSQQQTSADLISNVAGSPHSSSSPQPQGTK  
SVDGSSLGPLPEGWEQATTQEGEVYFINHQTRTTSWFDPRIPMTAMWSRTAIPSLVQRMRLRLSANHTMHLQKSP  
AGTILPQHSASWIQPLSTQSQLCQQKIRLQSLQMERERLKLRRQOEIMRQQGIMLRQASTTDLPPGANSAGMDPFL  
SGLTDHSRQESADSGLGMCNSYSLPHTPEDFLANMDDNMDGVSEGGNPADMATLDGPDISSLSDNIDSTDDLVP  
LQLSEEFSSDILDDVQSLINPNSRPDNLVTWL PLRMRKLPNSFFNPP

rs:XP\_021937266 [XP\_021937266] transcriptional coactivator YAP1 isoform  
X2 [Zootermopsis nevadensis]. 45..59

MALNPDSEQHKGNLVVTIDEDSDSDLQALFDSVLKPDSCRPLQVPLRMRKLPNSFFNPPSTGSKSPSVS  
SISHSRENSADSAFGTASVGAGPGGTTTTSAAGANGLQVNHPRAHSSPASLQQTYSASAQQQHHGLKQRSYDITT  
VDELGPLPPGWEQARTREGQVYYLNHITRTTTTWEDPRKTLAAQVAQSQQQTSADLISNVAGSPHSSSSPQPQGTK  
SVDGSSLGPLPEGWEQATTQEGEVYFINHQTRTTSWFDPRIPMHLQKSPAGTILPQHSASWIQPLSTQSQLCQQK  
IRLQSLQMERERLKLRRQOEIMRQQGIMLRQASTTDLPPGANSAGMDPFLSGLTDHSRQESADSGLGMCNSYSLPH  
TPEDFLANMDDNMDGVSEGGNPADMATLDGPDISSLSDNIDSTDDLVP  
LQLSEEFSSDILDDVQSLINPNSRPDNLVTWL PLRMRKLPNSFFNPP

rs:XP\_021947208 [XP\_021947208] transcriptional coactivator YAP1-like  
isoform X1 [Folsomia candida].>rs:XP\_021947209 [XP\_021947209]  
transcriptional coactivator YAP1-like isoform X1 [Folsomia candida].  
51..65

MATGGSGGGLPNGQSHKNQVIHIRGSDSELQALFDSVLAPNANRRPKQVPLRLRNLPDSFFNPPSIGS  
KSPSCSVSHSRENSVDSTLNPVRSPLSTAGASHSRAHSSPATLEQTYSVAAALPGLSLSQSGSANNLSDDPLPP  
GWEQACTPEGQIYFINHITRSTTWEDPRKAQTQQILAAIGNGTGSLSSQANHSGNVIQAVGSAVGPLPEGWEQAI  
TPEGEIYFIDHMNRSTTSWFDPRIPMHLQRPQVLQHQINAAALQASALAAASAAAISASSNVNTAVTSAAGTASL  
LNNNTSIQLSRQOEVRLOQLERERLKLRRQOEIMQQMEKEQARLRQQNRLQQMEDGEIDPFLGGSMVNPSTPSS  
DFHSRQESADSGLGMCNSYSLPNTPEDFLSNMDDNMDTISESIDAPDIGTLGNDNVESTDDLVP  
SLDISELNSEL SNELLEDQMOTIMNSSRSDNTMTWL PLRLRNLPDSFFNPP

rs:XP\_021947210 [XP\_021947210] transcriptional coactivator YAP1-like  
isoform X2 [Folsomia candida]. 51..65

MATGGSGGGLPNGQSHKNQVIHIRGSDSELQALFDSVLAPNANRRPKQVPLRLRNLPDSFFNPPSIGS  
KSPSCSVSHSRENSVDSTLNPVRSPLSTAGASHSRAHSSPATLEQTYSVAAALPGLSLSQSGSANNLSDDPLPPG  
WEQACTPEGQIYFINHITRSTTWEDPRKAQTQQILAAIGNGTGSLSSQANHSGNVIQAVGSAVGPLPEGWEQAIT  
PEGEIYFIDHMNRSTTSWFDPRIPMHLQRPQVLQHQINAAALQASALAAASAAAISASSNVNTAVTSAAGTASLL  
NNNTSIQLSRQOEVRLOQLERERLKLRRQOEIMQQMEKEQARLRQQNRLQQMEDGEIDPFLGGSMVNPSTPSSD  
FHSRQESADSGLGMCNSYSLPNTPEDFLSNMDDNMDTISESIDAPDIGTLGNDNVESTDDLVP  
SLDISELNSELS NELLDEMOTIMNSSRSDNTMTWL PLRLRNLPDSFFNPP

rs:XP\_022200458 [XP\_022200458] transcriptional coactivator yorkie-like  
[Nilaparvata lugens]. 42..56

MALNQDVERNQVVRIDQSDTELQALFDTVLKPDSKRPLQVPPFRMRKLPTSFNPPPTGSKSPSVSSIS

HSRENSADSAFGTTTNTGLQVNHPRAHSSPASLQQTYASAQQQPPPVQVQOHLKQRSYDITGGTIDELGPLPPGWE  
QARTPEGQVYFLK PFRMRKLPTSFFNPP

rs:XP\_022223909 [XP\_022223909] transcriptional coactivator yorkie isoform  
X1 [Drosophila obscura]. 65..79

MLTTMSTSNNTNIIIEKEIDDEDMLSPIKSSNNLVVRVNQDSTDNDLQALFDSVLNPGDAKRPLQLPFRMR  
KLPNSFFTPPAPSHSRANSADSTYDAGSQTNINKTAQPVVDVQQPAISQIQPSQQSRLAIHHFRARSSPASLQQNY  
NVRSRSEANPGTSSQGSPYENSAEFPNSAANNIELDGMNTCMGAQDMPMSTQTVHKKQRSYDVVSPIQQLQSOLG  
ALPPGWQAKTNDGQIYYLNHTTKSTQWEDPRIQYRQQQRLMAERIKQSDVLTQTTTSTIANSLGPLPDGW  
EQAVTESGDIYFINHIDRTTSWIDPRMQSGLTGLDCPDNLVSSLQIEDNICTNLFNDAQTIVNPPSSHKPDDLEW  
YKIN PFRMRKLPSFFTPP

rs:XP\_022223910 [XP\_022223910] transcriptional coactivator yorkie isoform  
X2 [Drosophila obscura]. 65..79

MLTTMSTSNNTNIIIEKEIDDEDMLSPIKSSNNLVVRVNQDSTDNDLQALFDSVLNPGDAKRPLQLPFRMR  
KLPNSFFTPPAPSHSRANSADSTYDAGSQTNINKTAQPVVDVQQPAISQIQPSQQSRLAIHHFRARSSPASLQQNY  
NVRSRSEANPGTSSQGSPYENSAEFPNSAANNIELDGMNTCMGAQDMPMSTQTVHKKQRSYDVVSPIQQLQSOLG  
ALPPGWQAKTNDGQIYYLNHTTKSTQWEDPRIQYRQQQRLMAERIKQSESGLTGLDCPDNLVSSLQIEDNICT  
NLFNDAQTIVNPPSSHKPDDLEWYKIN PFRMRKLPSFFTPP

rs:XP\_013791735 [XP\_013791735] transcriptional coactivator YAP1-like  
isoform X1 [Limulus polyphemus]. 46..60

MHSRDVIEQKGNQTVCYDSETNLDLDFKAAMLPKDSQVQLSGPPMRLRNLPRSFQPEGGSKSASH  
SRESSFEGTFSPPPSSTGPNMSKSPHQHTSGLTVSHRHTHSSPASLQQTYKQNTSQHQHLRQQSADSTDSVSL  
PPGWEMAKTPSGQRYFINHETKTTTWKDPKKNLSVGLTTSRSANPLVSTSSGANLLPINLGPLPEGWEQAYTP  
EGEVYFINHNDCTTSWFDPRLLTLQLGRLPLMQSPHHGQQPPPLSSPQQGQQQPQVQASSTGTQSLAQNIAAASI  
SAAVTTMTGAVNSQLNLQOQQOQQKLRHLRLQLERERLRLRQQEILRQPASLGNSMLNEMMLRRTLGEENPVVSK  
SPTGNTMDMTPVCTTGMDPFLGSSNQHARQGSSEDSGLGLGTNCSVPHTPENFLGSLEDVMDGGDIGQQRGSDVTM  
EVLHSTNLSLGDMSDDLVPSIQEEITEELLSDMESLLTSNKDNILTTLW PMRLRNLPRSFQPP

rs:XP\_022236543 [XP\_022236543] transcriptional coactivator YAP1-like  
isoform X2 [Limulus polyphemus]. 46..60

MHSRDVIEQKGNQTVCYDSETNLDLDFKAAMLPKDSQVQLSGPPMRLRNLPRSFQPEGGSKSASH  
SRESSFEGTFSPPPSSTGPNMSKSPHQHTSGLTVSHRHTHSSPASLQQTYKQNTSQHQHLRQQSADSTDSVSL  
PPGWEMAKTPSGQRYFINHETKTTTWKDPKKNLSVGLTTSRSANPLVSTSSGANLLPINLGPLPEGWEQAYTP  
EGEVYFINHNDCTTSWFDPRLLTLQLGRLPLMQSPHHGQQPPPLSSPQQGQQQPQVQASSTGTQSLAQNIAAASI  
SAAVTTMTGAVNSQLNLQOQQOQQKLRHLRLQLERERLRLRQQEILRQEMMLRRTLGEENPVVSKSPTGNTMDMT  
PVCTTGMDPFLGSSNQHARQGSSEDSGLGLGTNCSVPHTPENFLGSLEDVMDGGDIGQQRGSDVTMEVLHSTNLSL  
GIDMSDDLVPSIQEEITEELLSDMESLLTSNKDNILTTLW PMRLRNLPRSFQPP

rs:XP\_022236545 [XP\_022236545] transcriptional coactivator YAP1-like  
isoform X3 [Limulus polyphemus]. 46..60

MHSRDVIEQKGNQTVCYDSETNLDLDFKAAMLPKDSQVQLSGPPMRLRNLPRSFQPEGGSKSASH  
SRESSFEGTFSPPPSSTGPNMSKSPHQHTSGLTVSHRHTHSSPASLQQTYKQNTSQHQHLRQQSADSTDSVSL  
PPGWEMAKTPSGQRYFINHETKTTTWKDPKKNLSVGLTTSRSANPLVSTSSGANLLPINLGPLPEGWEQAYTP  
EALQLGRLPLMQSPHHGQQPPPLSSPQQGQQQPQVQASSTGTQSLAQNIAAASISAAVTTMTGAVNSQLNLQQQ  
QQQKLRHLRLQLERERLRLRQQEILRQPASLGNSMLNEMMLRRTLGEENPVVSKSPTGNTMDMTPVCTTGMDPF  
LGSSNQHARQGSSEDSGLGLGTNCSVPHTPENFLGSLEDVMDGGDIGQQRGSDVTMEVLHSTNLSLGDMSDDLV  
PSIQEEITEELLSDMESLLTSNKDNILTTLW PMRLRNLPRSFQPP

rs:XP\_022247787 [XP\_022247787] transcriptional coactivator YAP1-like  
isoform X1 [Limulus polyphemus]. 48..62

MSQLRDVVEQKGNQTVCYDSETNLDLDFKAAMLPRDSQVQLGGPPMRLRNLPRSFQPEGGSKSA  
SHSRESSFEGTFSPSSVGPSSSTAPSPRQASGLTVSHRHTHSSPATLQQSYNQNTFQNHRLRQQSADSTDSVPL  
PPGWEMAKTSSGQRYFINHETKSTTWTDPKKNLSVGLTTPRNTNTLMSTSAPNLPPINLGPLPEGWEQAFTPES  
EVYFINHNDRTTSWFDPRLLTLNLGRLPLMHHPHHGQQPPSMPSLQEQQSQVQANSSTGTQSLAQNISAAAASISAAV  
TTLTGAVNNQLSLQOQQOQQKLRHLRLQLMERERLRLRQQEILRQPTSLGNSMLNEMMLRRLNVEENPMIPKSPT  
VTTMDMTPICTTGIDPLLGSNQHARQGSSEDSGLGLGTSYSVPHTPENFLGSLEDTMDGGGSDINIEGLQSTNLS  
LGENMDSDDLVPSIQEELTEEILSDMESLLTSNKDNILTTLW PMRLRNLPRSFQPP

rs:XP\_022247788 [XP\_022247788] transcriptional coactivator YAP1-like isoform X2 [Limulus polyphemus].>rs:XP\_022247789 [XP\_022247789] transcriptional coactivator YAP1-like isoform X2 [Limulus polyphemus]. 48..62

MSQLRDVVEQKGNQTVCYDSETNLILDDLKFAAMLPRDSQVQLGGPPMRLRNLPRSFQPPPEGGSKSA  
SHSRESSFEGTFSPSSVGPSSSTAPSPRQOASGLTVSHRHTHSSPATLQOSYNQNTFQNHRLRQOSADSTDSVPL  
PPGWEMAKTSSGQRYFINHETKSTTWTDPKRNLSVGLTTPRNTNTLMSTSAPNLPPINLGLPLEGWEQAFTPE  
EVYFINHNDRTTSWFDPRLLTLNLGRLPLMHHPHHGQQPPSMPSLQEQQSQVQANSSTGQSLAQNISAAASISAAV  
TTLTGAVNNQLSLQQQQQQQQKRLRLQRLQMERERLRLRQOEILRQPTSLGNSMLNEMMLRRLNVEENPMIPKSPT  
VTTMDMTPICTTGIDPLLGSNNQHARQSEDSGLGLGTSYSVPHTPENFLGSLEDTMDGGGSDINIEGLQSTNLN  
LGSENMSDDLVPISIQCTVYTLDTDDASSILTRNSILLE PMRLRNLPRSFQPP

rs:XP\_022247790 [XP\_022247790] transcriptional coactivator YAP1-like isoform X3 [Limulus polyphemus]. 48..62

MSQLRDVVEQKGNQTVCYDSETNLILDDLKFAAMLPRDSQVQLGGPPMRLRNLPRSFQPPPEGGSKSA  
SHSRESSFEGTFSPSSVGPSSSTAPSPRQOASGLTVSHRHTHSSPATLQOSYNQNTFQNHRLRQOSADSTDSVPL  
PPGWEMAKTSSGQRYFINHETKSTTWTDPKRNLSVGLTTPRNTNTLMSTSAPNLPPINLGLPLEGWEQAFTPE  
EVYFINHNDRTTSWFDPRLLTLNLGRLPLMHHPHHGQQPPSMPSLQEQQSQVQANSSTGQSLAQNISAAASISAAV  
TTLTGAVNNQLSLQQQQQQQQKRLRLQRLQMERERLRLRQOEILRQEMMLRRLNVEENPMIPKSPTVTTMDMTPIC  
TTGIDPLLGSNNQHARQSEDSGLGLGTSYSVPHTPENFLGSLEDTMDGGGSDINIEGLQSTNLNLSSENMSDDL  
LVPSIQEELTEEILSDMESLLTSNKDNILTTLW PMRLRNLPRSFQPP

rs:XP\_013780310 [XP\_013780310] transcriptional coactivator YAP1-like [Limulus polyphemus]. 50..64

MSQVRDVIEQNGPNQIVRIRRDSETNLDDLKFAVLQPKDSQVQLSRRTVPMRLRNLPPSFQPPETKSA  
SHSRESSDSTTFSPCVSPVPGASPSPOGAQHSSNNILQVHHPRANSSPATLEQTYNQNTGQQHQHFRQHSYDNII  
DDVPLPSGWEMARTPSGQRYFLK PMRLRNLPPSFQPP

rs:XP\_022248441 [XP\_022248441] transcriptional coactivator YAP1-like isoform X1 [Limulus polyphemus].>rs:XP\_022248442 [XP\_022248442] transcriptional coactivator YAP1-like isoform X1 [Limulus polyphemus]. 46..60

MSQSRDVFVEQKGNQTVCYDSETNLDDLKFAAMLKPKDSQVQLSGPPMRLRNLPRSFQPPDGGSKSASH  
SRESSFEGTFSPPPPCSVGSNSATTSPQQQHIIVSGLTVSHRHTHSSPASLQOSYNQNTTSQHQHPRQOSADSIDS  
IPLPPGWEMAKTQSGERYFINHETKTTTTWKDPRKNLSVGLTTPRNSNLLVSTSTSGSNIPPINLGLPLEGWEQA  
CTPEGEVYFINHNDCTTSWLDPRLLTLQLGRLPLMQSPHHGLQOQTPMPSSQQLGQQQPQVQANSTGTQSCVQNNAA  
SASISAAVTTVAGSVNSQLNLQQQQQQQKQRLHRLQLERERLRLRQOEILRQPASLGNMMLNEMMLRRTLGEENS  
VIPKSPPGNTVDMIPVCTSGIDPFLGSSNQHARQSEDSGLGLGNTYSVPHTPENFLGSLEDVMDGGDIGQQAGG  
DISMEVLQNTNLNLGSDTMDSDDLVPISIQEEITEELLSDMESLLTSNKDNVLTW PMRLRNLPRSFQPP

rs:XP\_022248443 [XP\_022248443] transcriptional coactivator YAP1-like isoform X2 [Limulus polyphemus]. 46..60

MSQSRDVFVEQKGNQTVCYDSETNLDDLKFAAMLKPKDSQVQLSGPPMRLRNLPRSFQPPDGGSKSASH  
SRESSFEGTFSPPPPCSVGSNSATTSPQQQHIIVSGLTVSHRHTHSSPASLQOSYNQNTTSQHQHPRQOSADSIDS  
IPLPPGWEMAKTQSGERYFINHETKTTTTWKDPRKNLSVGLTTPRNSNLLVSTSTSGSNIPPINLGLPLEGWEQA  
CTPEGEVYFINHNDCTTSWLDPRLLTLQLGRLPLMQSPHHGLQOQTPMPSSQQLGQQQPQVQANSTGTQSCVQNNAA  
SASISAAVTTVAGSVNSQLNLQQQQQQQKQRLHRLQLERERLRLRQOEILRQEMMLRRTLGEENSVIPKSPPGNT  
VDMIPVCTSGIDPFLGSSNQHARQSEDSGLGLGNTYSVPHTPENFLGSLEDVMDGGDIGQQAGGDISMEVLQNT  
NLNLGSDTMDSDDLVPISIQEEITEELLSDMESLLTSNKDNVLTW PMRLRNLPRSFQPP

rs:XP\_022248444 [XP\_022248444] transcriptional coactivator YAP1-like isoform X3 [Limulus polyphemus]. 46..60

MSQSRDVFVEQKGNQTVCYDSETNLDDLKFAAMLKPKDSQVQLSGPPMRLRNLPRSFQPPDGGSKSASH  
SRESSFEGTFSPPPPCSVGSNSATTSPQQQHIIVSGLTVSHRHTHSSPASLQOSYNQNTTSQHQHPRQOSADSIDS  
IPLPPGWEMAKTQSGERYFINHETKTTTTWKDPRKNLSVGLTTPRNSNLLVSTSTSGSNIPPINLGLPLEGWEQA  
CTPEGEVYFINHNDCTTSWLDPRLLTLQLGRLPLMQSPHHGLQOQTPMPSSQQLGQQQPQVQANSTGTQSCVQNNAA  
SASISAAVTTVAGSVNSQLNLQQQQQQQKQRLHRLQLERERLRLRQOEILRQPASLGNMMLNEMMLRRTLGEENS  
VIPKSPPGNTVDMIPVCTSGIDPFLGSSNQHARQSEDSGLGLGNTYSVPHTPENFLGSLEDVMDGGDIGQQAGG  
DISMEVLQNTNLNLGSDTMDSDDLVPISIQKSQKNCSLIWSLF PMRLRNLPRSFQPP

rs:XP\_013791100 [XP\_013791100] transcriptional coactivator YAP1-like isoform X1 [Limulus polyphemus].>rs:XP\_022258909 [XP\_022258909] transcriptional coactivator YAP1-like isoform X1 [Limulus polyphemus]. 50..64

MSQARDVIEQKGNQIVRIRRDSETNLDDLKAVLQPKDSQVQLSRRTVPMRLRNLPSPFFQQPETKSA  
SHSRDSSCDATFSPTCVSPVSGAPPSPQLQVQAQHSISTNINNALQVHHPRANSSPASLEQTYNQNSGQQHQHLR  
QHSYDNMIDDVPLPSGWEMARTSSGQRYFLNHEAIHTQLT PMRLRNLPSPFFQQP

rs:XP\_022258910 [XP\_022258910] transcriptional coactivator YAP1-like isoform X2 [Limulus polyphemus]. 50..64

MSQARDVIEQKGNQIVRIRRDSETNLDDLKAVLQPKDSQVQLSRRTVPMRLRNLPSPFFQQPETKSA  
SHSRDSSCDATFSPTCVSPVSGAPPSPQLQVQAQHSISTNINNALQVHHPRANSSPASLEQTYNQNSGQQHQHLR  
QHSYDNMIDDVPLPSGWEMARTSSGQRYFLK PMRLRNLPSPFFQQP

rs:XP\_022322033 [XP\_022322033] uncharacterized protein LOC111123761 [Crassostrea virginica]. 115..129

MKQSEESTSSLLNFVDVASSNIKMALDRPPKSKRKNVHRKYLQKQLKSCGNVQQQQQENSRRLTGAH  
QIRLVRENPOQSGVQMKSLQDLFDPRTLHEKCCADPSSKNRGSKIPLRKRNLPPSPFFLEPSRLEQRDNLLESLS  
ALPDDFFHSLHRSPDLTSSDSDLSDILGNNDFFSEFPNTGQWNDSSSTDSFESDPCGSPNSDYSGLNNTVYFTEY  
PNSNPEFTPDYWSGTPACSRIQQPTFTENSFPQVCHPSFEPLRSTEQSFHGVTSYRESSFSKLPFPQAFLSRNC  
VNSNQSAEHWGNSCYTYL PLRKRNLPPSPFFLEP

rs:XP\_022343587 [XP\_022343587] uncharacterized protein LOC111136777 [Crassostrea virginica]. 264..278

MASISAAQVPLLDVNFGLGATQKSYGGKKAPHAHFSYSEEEETLHLSSNLAAKSYGGKRAPSSSLIAVN  
LDEDSKLACVKKSTLSNIIVLNDDEESPCYKSYGLKKIIPPTNALVNHDGEDMSQTTSQAGKRSNVSLTDIKEEGQ  
KDYEKVTLPPQGSKRGAPGLVTSSEDESLPPSPRNVSSSSVQHAYEHDHDYENVASPSGSSTASGPVYIRP  
PGFRHHAQEIKKVKKKKITEFDFKSALKKRAPTPPKVKPKRESVPMRLRALPQSFWKQPNVNPVSPAPLFPSP  
PLGSKDSSEDITDMRPITPPDDKERHKKQTRQPERKVVYVTDGTDLLKHLFDRAVEDKKNSHIKRGRPRKIAVPR  
ETSTKALISGDDPYLVDAVTQKLFQQLSLESRMGQIGSTSLQLVTLRDGDKSVTLPSLSIEQNYSQLTDLAMNI  
PMRLRALPQSFWKQP

rs:XP\_022286669 [XP\_022286669] transcriptional coactivator YAP1-like isoform X1 [Crassostrea virginica]. 43..57

MSQDMQERKGTQVVHVRENSGNELDALFYAANPNSELGGQIPFRQRKLPPSPFFNEPKPSGHVKQGSND  
STGFPGQMNPPAMGAHMRAHSSPANLQQTLSAAPPSPSHARQRSCDALLDPIESEPLPPGWEMAKTQDGQRYLNS  
SEKSLYKVDKGEKEMLLPMDNEGHLTQITTWQDPRKGS SNALNSRTPPNSQSPNVSLQNLGPLPPGWEQASTPEGD  
IYFINHMERTTSWYDPRIPPEQLQQLRLTSSQPGAQQVPPRQMNPRQMGQPPPQPPVNRAMGAKSPASLQFSKIQM  
EKELLRKRQEDLQRQEMMLRAQMQQQQIHDNPPSSQGIVISQSMEMPVIVADPFLGQSNVTANHIKQESSDSGVGG  
MGTGTPYGLSRTPEDFLSNVSEMEQDGGGHRHGEFNNMDIGNIGNEENSNMDSIDLVPQLQEDISNELLNDMES  
VLNVNKLNDNILAGDNSLTWL PFRQRKLPPSPFFNEP

rs:XP\_022286670 [XP\_022286670] transcriptional coactivator YAP1-like isoform X2 [Crassostrea virginica]. 43..57

MSQDMQERKGTQVVHVRENSGNELDALFYAANPNSELGGQIPFRQRKLPPSPFFNEPKPSGHVKQGSND  
STGFPGQMNPPAMGAHMRAHSSPANLQQTLSAAPPSPSHARQRSCDALLDPIESEPLPPGWEMAKTQDGQRYLNS  
SEKSLYKVDKGEKEMLLPMDNEGHLTQITTWQDPRKGS SNALNSRTPPNSQSPNVSLQNLGPLPPGWEQASTPEGD  
IYFINHMERTTSWYDPRIPPEQLQQLRLTSSQPGAQQVPPRQMNPRQMGQPPPQPPVNRAMGAKSPASLQFSKIQM  
EKELLRKRQEDLQRQEMMLRAQMQQQQIHDNPPSSQGIVISQSMEMPVIVADPFLGQSNVTANHIKQESSDSGVGM  
GTGTPYGLSRTPEDFLSNVSEMEQDGGGHRHGEFNNMDIGNIGNEENSNMDSIDLVPQLQEDISNELLNDMESV  
LNVNKLNDNILAGDNSLTWL PFRQRKLPPSPFFNEP

rs:XP\_022286671 [XP\_022286671] transcriptional coactivator YAP1-like isoform X3 [Crassostrea virginica]. 43..57

MSQDMQERKGTQVVHVRENSGNELDALFYAANPNSELGGQIPFRQRKLPPSPFFNEPKPSGHVKQGSND  
STGFPGQMNPPAMGAHMRAHSSPANLQQTLSAAPPSPSHARQRSCDALLDPIESEPLPPGWEMAKTQDGQRYLKV  
DKGKEMLLPMDNEGHLTQITTWQDPRKGS SNALNSRTPPNSQSPNVSLQNLGPLPPGWEQASTPEGDIYFINHME  
RTTSWYDPRIPPEQLQQLRLTSSQPGAQQVPPRQMNPRQMGQPPPQPPVNRAMGAKSPASLQFSKIQMEKELLRKR  
QEDLQRQEMMLRAQMQQQQIHDNPPSSQGIVISQSMEMPVIVADPFLGQSNVTANHIKQESSDSGVGGMGTGTPYGL



LSRTPEDFLSNVSEMEQDGGGHRHGEFNNMDIGNIGGNEENSNMDSDELVPSLQEDISNELLNDMESVLNVNKL  
NILAGDNSLTWL PFRQRKLPPSFFNEP

rs:XP\_022286672 [XP\_022286672] transcriptional coactivator YAP1-like  
isoform X4 [Crassostrea virginica].43..57

MSQDMQERKGTQVVHVRENSGNELDALFQYAANPNSELGGQIPFRQRKLPPSFFNEPKPSGHVKQGSND  
STGFPGQMNPMAGAHMRAHSSPANLQOTLSAAPQPPSHARQRSCDALLDPIESEPLPPGWEMAKTQDGQRYLNS  
SEKSLYNHLLTQITTWQDPRKGSNALSRTPPNSQSPNVSLQNLGGLPPGWEQASTPEGDIYFINHMERTTSWYD  
PRIPEQLQQLRLTSSQPGAQQVPPRQMNPRQMGQPPPQPPVNRAMGAKSPASLQFSKIOMEKELLRKRQEDLQ  
EMMLRAQMQQQIHDNPPSSQGIVISQSMEMPIVADPFLGQSNVTANHIKQESSDSGVGGMGTGTPYGLSRTPE  
FLSNVSEMEQDGGGHRHGEFNNMDIGNIGGNEENSNMDSDELVPSLQEDISNELLNDMESVLNVNKL  
NILAGDNSLTWL PFRQRKLPPSFFNEP

rs:XP\_022286673 [XP\_022286673] transcriptional coactivator YAP1-like  
isoform X5 [Crassostrea virginica].43..57

MSQDMQERKGTQVVHVRENSGNELDALFQYAANPNSELGGQIPFRQRKLPPSFFNEPKPSGHVKQGSND  
STGFPGQMNPMAGAHMRAHSSPANLQOTLSAAPQPPSHARQRSCDALLDPIESEPLPPGWEMAKTQDGQRYLNS  
LTQITTWQDPRKGSNALSRTPPNSQSPNVSLQNLGGLPPGWEQASTPEGDIYFINHMERTTSWYDPRIPEQLQ  
QLRLTSSQPGAQQVPPRQMNPRQMGQPPPQPPVNRAMGAKSPASLQFSKIOMEKELLRKRQEDLQ  
EMMLRAQMQQQIHDNPPSSQGIVISQSMEMPIVADPFLGQSNVTANHIKQESSDSGVGGMGTGTPYGLSRTPE  
EDGGGHRHGEFNNMDIGNIGGNEENSNMDSDELVPSLQEDISNELLNDMESVLNVNKL  
NILAGDNSLTWL PFRQRKLPPSFFNEP

rs:XP\_022286674 [XP\_022286674] transcriptional coactivator YAP1-A-like  
isoform X6 [Crassostrea virginica].43..57

MSQDMQERKGTQVVHVRENSGNELDALFQYAANPNSELGGQIPFRQRKLPPSFFNEPKPSGHVKQGSND  
STGFPGQMNPMAGAHMRAHSSPANLQOTLSAAPQPPSHARQRSCDALLDPIESEPLPPGWEMAKTQDGQRYLNS  
SEKSLYKVDKGEMLLPMDNEGHLTQITTWQDPRKGSNALSRTPPNSQSPNVSLQNLGGLPPGWEQASTPEG  
DIYFINHMERTTSWYDPRIPEQLQQLRLTSSQPGAQQVPPRQMNPRQMGQPPPQPPVNRAMGAKSPASLQFSKI  
OMEKELLRKRQEDLQ  
EMMLRAQMQQQIHDNPPSSQGIVISQSMEMPIVADPFLGQSNVTANHIKQESSDSGVGGMGTGTPYGLSRTPE  
FLSNVSEMEQDGGGHRHGEFNNMDIGNIGGNEENSNMDSDELVPSLQEDISNELLNDMESVLNVNKL  
NILAGDNSLTWL PFRQRKLPPSFFNEP

rs:XP\_007236793 [XP\_007236793] protein **FAM181B** [Astyanax mexicanus].  
156..170

MAVQAAIMNSQFLNFCFPGSVMEYEVEKGLDGGLLGEADCERDFRETTRDLLSFIDSASSNIKLALDKP  
VSKSRKVNHRKYLQKQIKRGTGIISSGTAATQEPCKRQDSPQTPTSTLQSKTPPKRDGAQANLQSKSLAALFNPA  
KDLRGERAKKPLRHRNLPPSFFTEPANCSRVTSTSGMSLKDRLRGNPDAAEFFELLGPDYSNMVTEQELFHTTT  
PVRVQOEGTGGPEPGAFFDHFVTGGFLYAEPWGTGSGASKKTGDMRTVPGQPPLYGSTDSSGPAPAEQSSPCSSL  
TFPNFFTDPCVSVSYDLASGYTRGSFPSL PLRHRNLPPSFFTEP

rs:XP\_022520645 [XP\_022520645] LOW QUALITY PROTEIN: transcriptional  
coactivator YAP1-like [Astyanax mexicanus]. 45..59

MDPGQHNPAGHQIVHVRGDSETDLEALFNAVMPKNAAVPPSVPMRMRKLPDSFFKPPPEPKSHSRQAS  
TDAGTAGTLTPQHVRHSSPASLQLGAVSPGTLTGLPQPGTSPQHRLRQPSYEIPDDVPLPPGWEMAKTASGQRYF  
LNHIDQSTTWQDPXKAMLQMNQPPPGSPVPVQQNLLNPASGGLPDGWEQAITSEGEIYYINHKNKTTSWLDPRL  
DPRFALNQQRISQSAPVKPGPPLPSSPPNAGVIGGSCQMRLLQQLQMEKERLRLKHQELLRRPQELALRNQLPTSM  
EQDGGTQNPVSSPGMGQDARSMTTNSDPFLNSGTYHSRDESTDSGLSMSSYSVPRTPDDFLNSVDEMETSDSL  
V PSMATQPRGFDPYLDIAIPGTDVLDLGTLEGESMAVEGEELMPSLQEQALSSDILNDMESVLAATKIDKESFLT  
WL PMRMRKLPDSFFKPP

rs:XP\_007257521 [XP\_007257521] protein **FAM181A** [Astyanax mexicanus].  
118..132

MASSDSEVKTLNLFVNLAASSDIKAALDKSAPCRRSVDHRKYLQKQLKRFSQKYSRMPRCHAHRAPDSAP  
KPIEDKPTPLTHESPAFLPHLTEKREPRERLDPNPDREEDPSRAGQLPMRKRQLPASFWEEPAPHGAHPCFHH  
AWKRRAHAGTRTQRESGGDERAADLLPPARRGSPDLEPLRVALTCGCAPFYRGSQALHTHAHTHLLLPQASLAH  
VGLRTKIGGTELDMQKVPDALKNSTTHVVVKPIPTKPVSTSIFSVFGFI PMRKRQLPASFWEEP

rs:XP\_022779114 [XP\_022779114] transcriptional coactivator YAP1-A-like  
[Stylophora pistillata].>tr:A0A2B4SPA1\_STYPI [A0A2B4SPA1] SubName:  
Full=Yorkie-like {ECO:0000313|EMBL:PFX32504.1}; 46..60

MERKNNNCVVHVRQDSNDLEALFHVSVKNSVAKTHPEPASSQSLPMRLRKLPPSFFKQPPIDGGLSPD  
HDVVKRLPISHSHSRSSPASLTVPTTLKGGPNHSLSPGVHHRSTSFNTALLEEPTPMPPGWEMRTTASGQRYF  
MNHFEQLTTWQDPRKTQSTSNLNSVQPVGNLPGWEQAITPEGDIYYINHIERTTSWIDPRLAMHCRNQESMRGS  
TLPPDFNRHGHRTRLQLHRLQREEREQLLKRQOELLKQEIKLKRDILEEGGKPSLLGNLTREFSAPDPPVTNGGHIR  
DESFDSGLGMGGGNYQFHDVDMNDSQPMFDANYNSKDTSFADPRIPEILDLSLPGTNVDLGVMEGTDNSTNMETE  
DLGVGLEFNSEILNDMESVLISPTLTWL PMRLRKLPPSFFKQP

rs:XP\_022780118 [XP\_022780118] uncharacterized protein LOC111321491  
[Stylophora pistillata].>tr:A0A2B4SSR6\_STYPI [A0A2B4SSR6] SubName:  
Full=Uncharacterized protein {ECO:0000313|EMBL:PFX31950.1}; 110..124

MDPQRKRLQHKDTLNRWTPPSISPPSPCGPSSPQSPPLVVRGKSLSLNRVVGAPALLPIRETPAKELSK  
RGRKQRLLLSQAGNLALKRRETSPDFNKLEARLKPKRGLPMMRMLPQSFWQEPKNIQNSSMSTEGTLSSSLPPL  
FHNANNTSYDVKVRPVTPEEKCLPRPPKEPKLVITSPQEQLLKLFETVEEDKTKKFVIRGRPRRVQSDLTFC  
QLPKLEEDPCMMTSLAEKLFQLSLENNKQTPGANTSLSCVSVHDGDKSVTLPSLNVEQNYSQLSEIVAHF  
PMRMLPQSFWQEP

rs:XP\_022793172 [XP\_022793172] uncharacterized protein LOC111332152  
[Stylophora pistillata]. 156..170

MNSLGEESVATPTSLNLFVSNATSALKFALDKPIKPKRKNHRKYLQRQLSGRSSSAATSSFDGWSISQ  
GEILFDHVLKSGQRGSASAVARAESSTAI PWKNRSEETQALGTDNVDLVFQKKRAQGKEKNWKITRSQQINDTK  
TSQALFSQPSQPLKRRKLPESFWTEPSPKASRKPLQATRNSKTNLATNELQRSELEILDWLRPELDDFIERWSEE  
SECASNSSRPDSLSDSPSTIDPHSPYSDESENVGLMDEFFEQRVFPFSFDSSTKNGECTSNIPSTRNYANANINF  
VNNRTYNVPQDYVQRPLNHSVSCYGGQYGFSA NEWSANPVQPNYFETGYNVLSPLKRRKLPESFWTEP

rs:XP\_018565735 [XP\_018565735] transcriptional coactivator YAP1-A isoform  
X1 [Anoplophora glabripennis]. 41..55

MALNQDEAKQEV RVNQDSETDLQALFDTVLKPD SKRPLQVPW SMRKL PDSFFNPPSTGSKS INHSRENS  
VDSAFGGGATAAAPVNSVPLQTAH HRAHSSPASLQQTYAVGQQQAPVHHIKQRSYDVASKTEDNTPLPPGWEQAR  
TPEGQVYYLNHTTRTTTWEDPRKSLAAQAAAQQHQSAEQLLTAHQI SHPQSPNPNTAKVNSDVDLGPLPEGWEQA  
QTPEGEIYFINHQTRTTSWFDPRIPTHLQQR PAPANLVGSTWHSQALSSSPSKAQQIRLQQLRMERERLKRQEQE  
IMRQQDIMMRSSSDLPVMDPFLSSLT DHSRQESGDSGLGMGTTY SMPHTPEDFLANMDDNMDV GSESHMTDTPDI  
STLSDNIDSTDDLVP TLLQLGEEFPILDDVQSLINPPTTKPDNVL IWL PWSMRKL PDSFFNPP

rs:XP\_018565736 [XP\_018565736] WW domain-containing transcription  
regulator protein 1 isoform X2 [Anoplophora glabripennis]. 41..55

MALNQDEAKQEV RVNQDSETDLQALFDTVLKPD SKRPLQVPW SMRKL PDSFFNPPSTGSKS INHSRENS  
VDSAFGGGATAAAPVNSVPLQTAH HRAHSSPASLQQTYAVGQQQAPVHHIKQRSYDVASKTEDNTPLPPGWEQAR  
TPEGQVYYLNHTTRTTTWEDPRKSLAAQAAAQQHQSAEQLLTAHQI SHPQSPNPNTTHLQQR PAPANLVGSTWHS  
QALSSSPSKAQQIRLQQLRMERERLKRQEQEIMRQQDIMMRSSSDLPVMDPFLSSLT DHSRQESGDSGLGMGTTY  
SMPHTPEDFLANMDDNMDV GSESHMTDTPDISTLSDNIDSTDDLVP TLLQLGEEFPILDDVQSLINPPTTKPDNVL  
IWL PWSMRKL PDSFFNPP

rs:XP\_023500466 [XP\_023500466] transcriptional coactivator YAP1 isoform  
X1 [Equus caballus]. 85..99

MDPGQQPPPPQAPQGGQPPAQAPQGGQPPSGPGQPAPPGSQAASQAPPAGHQIVHVRGDSETDLEALF  
NAVMPKNTANVPQTLPMRLRKL PDSFFKPPKSHSRQASTDAGTAGALTPQH VRAHSSPASLQLGAVSPGTLTP  
TGVVSGPAATPAAQHLRQSSFEIPDDVPLPAGWEMAKTSSGQRYFLNHIDQTTTWQDPRKAMLSQMNVTAPTSP  
VQQNMMNSASGPLPDGWEQAMTQDGEIYYINHKNTTSWLDPRLDPRFGKAMNQRI SQSAPVKQPPPLAPQSPQG  
GVMGSGSSNQQQMRLQQLQMEKERLRLKQOELLRQVRPQAMRNINPSTANS PKQELALRSQLP TLEQDGGTQN  
PVSSPGMSQELRTMTTNSSDPFLNSGTYHSRDESTDSGLSMSSYSVPRTPDDFLNSVDEM DTGDTINQSTLPSQQ  
NRFPDYLEAIPGTNVDLGTLEGDMNIEGEELMPSLQEQALSSDILNDMESVLAATKLDKESFLTWL  
PMRLRKL PDSFFKPP

rs:XP\_023500467 [XP\_023500467] transcriptional coactivator YAP1 isoform  
X2 [Equus caballus]. 85..99

MDPGQQPPPPQAPQGGQPPAQAPQGGQPPSGPGQPAPPGSQAASQAPPAGHQIVHVRGDSETDLEALF

NAVMPKPTANVPQTLPMRLRKL PDSFFKPPPEPKSHSRQASTDAGTAGALTPQHVRHSSPASLQLGAVSPGTLTP  
TGVVSGPAATPAAQHLRQSSFEIPDDVPLPAGWEMAKTSSGQRYFLNHIDQTTTWQDPRKAMLSQMNVTAPTSPP  
VQQNMMNSASGPLPDGWEQAMTQDGEIYYINHKNKTTSWLDPRLDPRFAMNQRISQSAPVKQPPPLAPQSPQGGV  
MGSGSSNQQQMRLQQLQMEKERLRLKQOELLRQVRPQAMRNINPSTANS PKCQELALRSQLPTLEQDGGTQNPV  
SSPGMSQELRTMTTNSSDPFLNSGTYHSRDESTDSGLSMSSYSVPRTPDDFLNSVDEMMDTGD TINQSTLPSQQNR  
FPDYLEAIPGTNVDLGTLEGDGMNIEGEEELMPSLQEALSSDILNDMESVLAATKLDKESFLTWL  
PMRLRKL PDSFFKPP

rs:XP\_023500468 [XP\_023500468] transcriptional coactivator YAP1 isoform  
X3 [Equus caballus]. 85..99

MDPGQQPPPQPAPQGGQPPAQAPQGGQPPSGPGQPAPPGSQAASQAPPAGHQIVHVRGDSETDLEALF  
NAVMPKPTANVPQTLPMRLRKL PDSFFKPPPEPKSHSRQASTDAGTAGALTPQHVRHSSPASLQLGAVSPGTLTP  
TGVVSGPAATPAAQHLRQSSFEIPDDVPLPAGWEMAKTSSGQRYFLNHIDQTTTWQDPRKAMLSQMNVTAPTSPP  
VQQNMMNSASGPLPDGWEQAMTQDGEIYYINHKNKTTSWLDPRLDPRFGKAMNQRISQSAPVKQPPPLAPQSPQG  
GVMGSGSSNQQQMRLQQLQMEKERLRLKQOELLRQAMRNINPSTANS PKCQELALRSQLPTLEQDGGTQNPVSS  
PGMSQELRTMTTNSSDPFLNSGTYHSRDESTDSGLSMSSYSVPRTPDDFLNSVDEMMDTGD TINQSTLPSQQNRFP  
DYLEAIPGTNVDLGTLEGDGMNIEGEEELMPSLQEALSSDILNDMESVLAATKLDKESFLTWL  
PMRLRKL PDSFFKPP

rs:XP\_023500469 [XP\_023500469] transcriptional coactivator YAP1 isoform  
X4 [Equus caballus]. 85..99

MDPGQQPPPQPAPQGGQPPAQAPQGGQPPSGPGQPAPPGSQAASQAPPAGHQIVHVRGDSETDLEALF  
NAVMPKPTANVPQTLPMRLRKL PDSFFKPPPEPKSHSRQASTDAGTAGALTPQHVRHSSPASLQLGAVSPGTLTP  
TGVVSGPAATPAAQHLRQSSFEIPDDVPLPAGWEMAKTSSGQRYFLNHIDQTTTWQDPRKAMLSQMNVTAPTSPP  
VQQNMMNSASGPLPDGWEQAMTQDGEIYYINHKNKTTSWLDPRLDPRFAMNQRISQSAPVKQPPPLAPQSPQGGV  
MGSGSSNQQQMRLQQLQMEKERLRLKQOELLRQAMRNINPSTANS PKCQELALRSQLPTLEQDGGTQNPVSSPG  
MSQELRTMTTNSSDPFLNSGTYHSRDESTDSGLSMSSYSVPRTPDDFLNSVDEMMDTGD TINQSTLPSQQNRFPDY  
LEAIPGTNVDLGTLEGDGMNIEGEEELMPSLQEALSSDILNDMESVLAATKLDKESFLTWL  
PMRLRKL PDSFFKPP

rs:XP\_023500470 [XP\_023500470] transcriptional coactivator YAP1 isoform  
X5 [Equus caballus]. 85..99

MDPGQQPPPQPAPQGGQPPAQAPQGGQPPSGPGQPAPPGSQAASQAPPAGHQIVHVRGDSETDLEALF  
NAVMPKPTANVPQTLPMRLRKL PDSFFKPPPEPKSHSRQASTDAGTAGALTPQHVRHSSPASLQLGAVSPGTLTP  
TGVVSGPAATPAAQHLRQSSFEIPDDVPLPAGWEMAKTSSGQRYFLNHIDQTTTWQDPRKAMLSQMNVTAPTSPP  
VQQNMMNSASGPLPDGWEQAMTQDGEIYYINHKNKTTSWLDPRLDPRFGKAMNQRISQSAPVKQPPPLAPQSPQG  
GVMGSGSSNQQQMRLQQLQMEKERLRLKQOELLRQVRPQELALRSQLPTLEQDGGTQNPVSSSPGMSQELRTMTT  
NSSDPFLNSGTYHSRDESTDSGLSMSSYSVPRTPDDFLNSVDEMMDTGD TINQSTLPSQQNRFPDYLEAIPGTNVD  
LGTLEGDGMNIEGEEELMPSLQEALSSDILNDMESVLAATKLDKESFLTWL PMRLRKL PDSFFKPP

rs:XP\_023500471 [XP\_023500471] transcriptional coactivator YAP1 isoform  
X6 [Equus caballus]. 85..99

MDPGQQPPPQPAPQGGQPPAQAPQGGQPPSGPGQPAPPGSQAASQAPPAGHQIVHVRGDSETDLEALF  
NAVMPKPTANVPQTLPMRLRKL PDSFFKPPPEPKSHSRQASTDAGTAGALTPQHVRHSSPASLQLGAVSPGTLTP  
TGVVSGPAATPAAQHLRQSSFEIPDDVPLPAGWEMAKTSSGQRYFLNHIDQTTTWQDPRKAMLSQMNVTAPTSPP  
VQQNMMNSASGPLPDGWEQAMTQDGEIYYINHKNKTTSWLDPRLDPRFAMNQRISQSAPVKQPPPLAPQSPQGGV  
MGSGSSNQQQMRLQQLQMEKERLRLKQOELLRQVRPQELALRSQLPTLEQDGGTQNPVSSSPGMSQELRTMTTNS  
SDPFLNSGTYHSRDESTDSGLSMSSYSVPRTPDDFLNSVDEMMDTGD TINQSTLPSQQNRFPDYLEAIPGTNVDL  
GTLEGDGMNIEGEEELMPSLQEALSSDILNDMESVLAATKLDKESFLTWL PMRLRKL PDSFFKPP

rs:XP\_023500472 [XP\_023500472] transcriptional coactivator YAP1 isoform  
X7 [Equus caballus]. 85..99

MDPGQQPPPQPAPQGGQPPAQAPQGGQPPSGPGQPAPPGSQAASQAPPAGHQIVHVRGDSETDLEALF  
NAVMPKPTANVPQTLPMRLRKL PDSFFKPPPEPKSHSRQASTDAGTAGALTPQHVRHSSPASLQLGAVSPGTLTP  
TGVVSGPAATPAAQHLRQSSFEIPDDVPLPAGWEMAKTSSGQRYFLNHIDQTTTWQDPRKAMLSQMNVTAPTSPP  
VQQNMMNSASGPLPDGWEQAMTQDGEIYYINHKNKTTSWLDPRLDPRFGKAMNQRISQSAPVKQPPPLAPQSPQG  
GVMGSGSSNQQQMRLQQLQMEKERLRLKQOELLRQELALRSQLPTLEQDGGTQNPVSSSPGMSQELRTMTTNS  
SDPFLNSGTYHSRDESTDSGLSMSSYSVPRTPDDFLNSVDEMMDTGD TINQSTLPSQQNRFPDYLEAIPGTNVDL  
GTLEGDGMNIEGEEELMPSLQEALSSDILNDMESVLAATKLDKESFLTWL PMRLRKL PDSFFKPP

rs:XP\_023500473 [XP\_023500473] transcriptional coactivator YAP1 isoform X8 [Equus caballus]. 85..99

MDPGQQPPPPQAPQGGQPPAQAPQGGQPPSGPGQPAPPPGSAASQAPPAGHQIVHVRGDSETDLEALF  
NAVMNPKTANVPQTLPMRLRKLKLPDSFFKPPPEPKSHSRQASTDAGTAGALTPQHVRHSSPASLQLGAVSPGTLTP  
TGVVSGPAATPAAQHLRQSSFEIPDDVPLPAGWEMAKTSSGQRYFLNHIDQTTTWQDPRKAMLSQMNVTAPTSPP  
VQQNMMNSASGPLPDGWEQAMTQDGEIYYINHKNTTSWLDPRLDPRFAMNQRIQSAPVKQPPPLAQSPQGGV  
MGSGSSNQQQMRLQQLQMEKERLRLKQQELLRQELALRSQLPTLEQDGGTQNPVSSPGMSQELRTMTTNSDDPF  
LNSGTYHSRDESTDSGLSMSSYSVPRTPDDFLNSVDEMGTGDTINQSTLPSQQNRFPDYLEAIPGTNVDLGTLEG  
DGMNIEGEEELMPSLQEQALSSDILNDMESVLAATKLDKESFLTWL PMRLRKLKLPDSFFKPP

rs:XP\_023500474 [XP\_023500474] transcriptional coactivator YAP1 isoform X9 [Equus caballus]. 85..99

MDPGQQPPPPQAPQGGQPPAQAPQGGQPPSGPGQPAPPPGSAASQAPPAGHQIVHVRGDSETDLEALF  
NAVMNPKTANVPQTLPMRLRKLKLPDSFFKPPPEPKSHSRQASTDAGTAGALTPQHVRHSSPASLQLGAVSPGTLTP  
TGVVSGPAATPAAQHLRQSSFEIPDDVPLPAGWEMAKTSSGQRYFLNHIDQTTTWQDPRKAMLSQMNVTAPTSPP  
VQQNMMNSASAMNQRIQSAPVKQPPPLAQSPQGGVMGSGSSNQQQMRLQQLQMEKERLRLKQQELLRQVRPQ  
AMRNINPSTANSKQELALRSQLPTLEQDGGTQNPVSSPGMSQELRTMTTNSDDPFLNSGTYHSRDESTDSGLS  
MSSYSVPRTPDDFLNSVDEMGTGDTINQSTLPSQQNRFPDYLEAIPGTNVDLGTLEGDGMNIEGEEELMPSLQEQAL  
SSDILNDMESVLAATKLDKESFLTWL PMRLRKLKLPDSFFKPP

rs:XP\_023500475 [XP\_023500475] transcriptional coactivator YAP1 isoform X10 [Equus caballus]. 85..99

MDPGQQPPPPQAPQGGQPPAQAPQGGQPPSGPGQPAPPPGSAASQAPPAGHQIVHVRGDSETDLEALF  
NAVMNPKTANVPQTLPMRLRKLKLPDSFFKPPPEPKSHSRQASTDAGTAGALTPQHVRHSSPASLQLGAVSPGTLTP  
TGVVSGPAATPAAQHLRQSSFEIPDDVPLPAGWEMAKTSSGQRYFLNHIDQTTTWQDPRKAMLSQMNVTAPTSPP  
VQQNMMNSASAMNQRIQSAPVKQPPPLAQSPQGGVMGSGSSNQQQMRLQQLQMEKERLRLKQQELLRQAMRN  
INPSTANSKQELALRSQLPTLEQDGGTQNPVSSPGMSQELRTMTTNSDDPFLNSGTYHSRDESTDSGLSMSSY  
SVPRTPDDFLNSVDEMGTGDTINQSTLPSQQNRFPDYLEAIPGTNVDLGTLEGDGMNIEGEEELMPSLQEQALSSDI  
LNDMESVLAATKLDKESFLTWL PMRLRKLKLPDSFFKPP

rs:XP\_023500476 [XP\_023500476] transcriptional coactivator YAP1 isoform X11 [Equus caballus]. 85..99

MDPGQQPPPPQAPQGGQPPAQAPQGGQPPSGPGQPAPPPGSAASQAPPAGHQIVHVRGDSETDLEALF  
NAVMNPKTANVPQTLPMRLRKLKLPDSFFKPPPEPKSHSRQASTDAGTAGALTPQHVRHSSPASLQLGAVSPGTLTP  
TGVVSGPAATPAAQHLRQSSFEIPDDVPLPAGWEMAKTSSGQRYFLNHIDQTTTWQDPRKAMLSQMNVTAPTSPP  
VQQNMMNSASAMNQRIQSAPVKQPPPLAQSPQGGVMGSGSSNQQQMRLQQLQMEKERLRLKQQELLRQVRPQ  
ELALRSQLPTLEQDGGTQNPVSSPGMSQELRTMTTNSDDPFLNSGTYHSRDESTDSGLSMSSYSVPRTPDDFLNS  
VDEMGTGDTINQSTLPSQQNRFPDYLEAIPGTNVDLGTLEGDGMNIEGEEELMPSLQEQALSSDILNDMESVLAATK  
LDKESFLTWL PMRLRKLKLPDSFFKPP

rs:XP\_023500477 [XP\_023500477] transcriptional coactivator YAP1 isoform X12 [Equus caballus]. 85..99

MDPGQQPPPPQAPQGGQPPAQAPQGGQPPSGPGQPAPPPGSAASQAPPAGHQIVHVRGDSETDLEALF  
NAVMNPKTANVPQTLPMRLRKLKLPDSFFKPPPEPKSHSRQASTDAGTAGALTPQHVRHSSPASLQLGAVSPGTLTP  
TGVVSGPAATPAAQHLRQSSFEIPDDVPLPAGWEMAKTSSGQRYFLNHIDQTTTWQDPRKAMLSQMNVTAPTSPP  
VQQNMMNSASAMNQRIQSAPVKQPPPLAQSPQGGVMGSGSSNQQQMRLQQLQMEKERLRLKQQELLRQELAL  
RSQLPTLEQDGGTQNPVSSPGMSQELRTMTTNSDDPFLNSGTYHSRDESTDSGLSMSSYSVPRTPDDFLNSVDEM  
DTGDTINQSTLPSQQNRFPDYLEAIPGTNVDLGTLEGDGMNIEGEEELMPSLQEQALSSDILNDMESVLAATKLDKE  
SFLTWL PMRLRKLKLPDSFFKPP

rs:XP\_023501415 [XP\_023501415] protein **FAM181B** [Equus caballus]. 221..235

MAVQAALLSTHPFVFPFGGGSPDGLGGAFGALDKGCCFEDDESSTPGGALLAGAEGGDVREATRDLLSF  
IDSASSNIKLALDKPGKSKRKNVHRKYLQKQIKRCSGLMGAAPPSPGAADTPAKRPLAAPGAQTVAGPAHGK  
AAPPREASQAAAAASLQSRSLAALFDSLHRVPGAEPAGGSVAAPAAGLGGAGAGGAGGDAAGPAGGTAVPGARK  
VPLRARNLPPSFFTEPSRAGGGGGCGPSGPPVSLGDLEKGAEEVEFFELLAPDYGTGTEAGVLLAAEPLDVFP  
GAAALRGPPPELEPLFEPPPGMVGSLLYPEPWGAPGCPSTKPKQLAAPRGGLTLNEPLRPLYPAAADSPGGEDAP  
GLLASFAPFFSDCALPPAPPPHQVSYDYSAGYGRATAYSSLWRADADWEGAPGEEGAHRD  
PLRARNLPPSFFTEP

rs:XP\_012370487 [XP\_012370487] protein **FAM181B** [Octodon degus].112..126  
MAVQAALLRAHPFAPFGFGGAPDGLGGAFGAADGGCCFEEDERAASAAEATRELLSFIDSASSNIKLAL  
DKPGKSRKVNHRKYLQKQIKRCGGLAGAAPPPPAPDGAAKVPLRARKLPASFFTEPARAGPSGSPSLGELEPGAA  
ELLELLGPDYADPEAGVLLAAEPLDVFPAAGLRASLELEPGLFEPPAVVGSLLYPEPWGAPGCPPAGKPPLAAA  
RGGLSPSESLRPLYATAADSAGEDGPGPAAAFAPFFPDCAPPPPPPPPHQASYDFSASYSRSPYPGLWRPDGAW  
DGAPGEPGVHPD PLRARKLPASFFTEP

rs:XP\_007104739 [XP\_007104739] protein **FAM181A** isoform X1 [Physeter  
catodon].>tr:A0A2Y9ELA9\_PHYCD [A0A2Y9ELA9] SubName: Full=protein **FAM181A**  
isoform X1 {ECO:0000313|RefSeq:XP\_007104739.2};193..207  
MLLRGSPCCPQPEISPPGRPRLECQTGVLPVLRNENCQLGALPWSRQPPAEPSSWKAPCSGPLAMASDS  
DVKMLLNFNVLASSDIKAALDKSAPCRRSVDHRKYLQKQLKRFSQKYSRLPRGLPGRRAEPHLKSGSEDRPGRPL  
LDGHRPSPSGGGCCKEKALGNPYREECLSKEQTLHGPDPEAARPGQVPMRKRQLPASFWEEPPTHSYVVGLE  
GLGPREGPPYEGKKHCKGLEPLGPETAPVPASPRAPAEKEPLKMPGVSLVGRVNAWSSCCPFQYHGQPVYGP  
PPGALPQSPHPSLGLWRKSSASPGELAHFCKDVEGPGQKVYRPVVLKPIPTKPAMPPPIFNVFGYL  
PMRKRQLPASFWEEP

rs:XP\_023986714 [XP\_023986714] protein **FAM181A** isoform X2 [Physeter  
catodon].>tr:A0A2Y9TF16\_PHYCD [A0A2Y9TF16] SubName: Full=protein **FAM181A**  
isoform X2 {ECO:0000313|RefSeq:XP\_023986714.1};129..143  
MASDSVDMMLNFNVLASSDIKAALDKSAPCRRSVDHRKYLQKQLKRFSQKYSRLPRGLPGRRAEPHLK  
SGSEDRPGRPLDLSGHRPSPSGGGCCKEKALGNPYREECLSKEQTLHGPDPEAARPGQVPMRKRQLPASFWEEP  
PTHSYVVGLEGLGPREGPPYEGKKHCKGLEPLGPETAPVPASPRAPAEKEPLKMPGVSLVGRVNAWSSCCPFQY  
HGQPVYGP  
PPGALPQSPHPSLGLWRKSSASPGELAHFCKDVEGPGQKVYRPVVLKPIPTKPAMPPPIFNVFGYL  
PMRKRQLPASFWEEP

rs:XP\_023993306 [XP\_023993306] protein **FAM181A** [Salvelinus alpinus].  
125..139  
MASADSEVKTLNFNVLASSDIKAALDKSAPCRRSVDHRKYLQKQLKRFSQKYARMRCHTRHSTESSI  
AKDVVNKSSAYSLETIHSTTRINEKGGSDAQDVENARMAQTPTVSDNSKQEQVPMRKRQLPASFWEEPRLAQ  
TNTDYLQYGWKKSQGVTGINEVEKIKKAHEEPTPTLFLSNRRGSVEKEPLKLDVASHNVNVCGFQYHGHV  
FQSHIVVPQSAVGLWGKATVAETETPDIAHRYKNYTHVVVKPIPTKPTVPPSIFNVFGFI PMRKRQLPASFWEEP

rs:XP\_023993347 [XP\_023993347] transcriptional coactivator YAP1-like  
[Salvelinus alpinus]. 45..59  
MDPSQHNPAGHQI IHVRGDSETDLETLFNAVMPKNTSVPPSVPMRMRKLPDSFFKPPPEPKSHSRQTS  
TDAGTAGAIAPTTWRAHSSPASLQLGAVVSPVGHGPAAPPHPPTVVL PMRMRKLPDSFFKPP

rs:XP\_024000598 [XP\_024000598] protein **FAM181B** [Salvelinus alpinus].  
174..188  
MAVQTAIMNSPFINFCFPGSVMMEYDMDQSLDGSLLLEESEERGEYKETTNRNLSFIDSASSNIKLALDK  
PVKSKRKNVHRKYLQKQIKRCTGFISPTGNPAAAPGAGANKRKGSGFPTQTQPQTQPQTPSPFQQGKPVH  
KRDGLQANLQTKSLAALFNSVKEPVRGERAKKPLRHRNLPPSFFTEPANTTTTSTSVTSTSGTFLGDLER  
GGNPDDFDLLGPDYSNMLSDQDVFQTRGLPSRIIDQDLFQTRGLPSRILQHQQTQDITDQVSPYDP  
HHLVGGFLYTEPFWSTSSPSKKAGEGVRTGPGPQTPLYCQAGEGVRTGPGTQTPLYCQAGEGVRAGP  
GTQTPLYCQAGEGVRTGPGTQTPMSARQERAYGGPRNTDTPVLPSSRRGRTGRTGTQTPCTVTLC  
LTPPLRHRNLPPSFFTEP

rs:XP\_014241727 [XP\_014241727] transcriptional coactivator YAP1-A-like  
isoform X1 [Cimex lectularius]. 45..59  
MSGNPEVDQFKSNLVVRIDQDSDSELQALFDSVLKPDSCRPLQVPLMRNLNPNFFNPPSTGSKSPSVS  
SISHSRENSADSAFGTKTTTTVSLQVNHPRAHSSPASLQQTYASAQQQTPQHLKQRSYDMTALDELG  
PLPPGWQEARTESEGQIYFLNHITQTTTWEDPRKTAQAQQRSQEMLNTVPTSPHPPTSPQPHQSKNGG  
VSSPAGSATLGLPLPDGWEQASTAEGEVYFINHQTKTTSWFDPRIPVHLQRAPTAAGTLP  
GWLQPLTQSQNLQAATQQKLRLLQSLQMERERLKLKQQEIMRQQELMLRDAPATTGLDPFLSGLAD  
HSRQESADSGLGLGNSYSLPHTPDDFLSSMDDNMDGVSEGGTGAEIASLDSHEITSLS  
DNIDSTDDLVPSSLQLGEEFTSDILDVQALINPNSKPGNSLTWLPLMRNLNPNFFNPP

rs:XP\_014241728 [XP\_014241728] transcriptional coactivator yorkie-like  
isoform X2 [Cimex lectularius]. 45..59



DAIILDHSRQESADSGGLSHNLDLPYTPNDLQNAADDLGLDLSITNMDLETDAMDLMCLPEELNTDIVLSDLEA  
FLTANANITTSKDVWI PMRQRDLPASFFTPP

rs:XP\_023197954 [XP\_023197954] transcriptional coactivator YAP1-like  
isoform X1 [Xiphophorus maculatus].>rs:XP\_027887757 [XP\_027887757]  
transcriptional coactivator YAP1-like isoform X1 [Xiphophorus  
couchianus].>rs:XP\_027887758 [XP\_027887758] transcriptional coactivator  
YAP1-like isoform X1 [Xiphophorus couchianus]. 46..60

MDAHRGAPPAGQQVVHVRGDSKTELEALFNAV MNPSKATRQPPSVPMRMRKFPDSFFKPPEPRGHSRQA  
SSDGGLCGSLAPHHVRAHSSPASLPVNSLSAQADADAAAATPIIPDDVPLPDGWEMAKTSTGQRYFINHVHRTTTW  
QDPRLSQLQSAAAQHQIACTPSHAHSFSNPAPTTQPKNIVPETGPLEGWEQAVTTDGEMYYIDHINQATTWDDP  
RLAPKVNPAIILSLAMQQRLEKLRLKQGIPPOFAPQLNETKHTRIQQVQEAGGSNQMPGGMDHRSQAQMLVPSVDIR  
IRALNQEPNLNGAHSRNESTDSGLSVSSLSRTSDHMLSSVDHMDTGDSSEPPSMGLQESMPVLPINEDLMPGIPD  
SLTSDMLMEMDTVLSGPHMDRDSLTLTWL PMRMRKFPDSFFKPP

rs:XP\_014326808 [XP\_014326808] transcriptional coactivator YAP1-like  
isoform X2 [Xiphophorus maculatus].>rs:XP\_027887759 [XP\_027887759]  
transcriptional coactivator YAP1-like isoform X2 [Xiphophorus  
couchianus].>tr:M4A8R8\_XIPMA [M4A8R8] SubName: Full=Uncharacterized protein  
{ECO:0000313|Ensembl:ENSXMAP00000010862}; 46..60

MDAHRGAPPAGQQVVHVRGDSKTELEALFNAV MNPSKATRQPPSVPMRMRKFPDSFFKPPEPRGHSRQA  
SSDGGLCGSLAPHHVRAHSSPASLPVNSLSAQADADAAAATPIIPDDVPLPDGWEMAKTSTGQRYFINHVHRTTTW  
QDPRLSQLQSAAAQHQIACTPSHAHSFSNPAPTTQPKNIVPETGPLEGWEQAVTTDGEMYYIDHINQATTWDDP  
RLAPKVNPAIILSLAMQQRLEKLRLKQGIPPOFAPQVQEAGGSNQMPGGMDHRSQAQMLVPSVDIRIRALNQEPNL  
NGAHSRNESTDSGLSVSSLSRTSDHMLSSVDHMDTGDSSEPPSMGLQESMPVLPINEDLMPGIPDLSLSDMLMEM  
DTVLSGPHMDRDSLTLTWL PMRMRKFPDSFFKPP

rs:XP\_023197955 [XP\_023197955] transcriptional coactivator YAP1-like  
isoform X3 [Xiphophorus maculatus].>rs:XP\_027887760 [XP\_027887760]  
transcriptional coactivator YAP1-like isoform X3 [Xiphophorus couchianus].  
46..60

MDAHRGAPPAGQQVVHVRGDSKTELEALFNAV MNPSKATRQPPSVPMRMRKFPDSFFKPPEPRGHSRQA  
SSDGGLCGSLAPHHVRAHSSPASLPVNSLSAQADADAAAATPIIPDDVPLPDGWEMAKTSTGQRYFINHVHRTTTW  
QDPRLSQLQSAAAQHQIACTPSHAHSFSNPAPTTQPKNIVPETGPLEGWEQAVTTDGEMYYIDHINQATTWDDP  
RLAPKVNPAIILSLAMQQRLEKLRLKQGIPPOFAPQVQEAGGSNQMPGGMDHRSQAQMLVPSVDIRIRALNQEPNLNG  
AHSRNESTDSGLSVSSLSRTSDHMLSSVDHMDTGDSSEPPSMGLQESMPVLPINEDLMPGIPDLSLSDMLMEMDT  
VLSGPHMDRDSLTLTWL PMRMRKFPDSFFKPP

rs:XP\_023197956 [XP\_023197956] transcriptional coactivator YAP1-like  
isoform X4 [Xiphophorus maculatus].>rs:XP\_027887761 [XP\_027887761]  
transcriptional coactivator YAP1-like isoform X4 [Xiphophorus couchianus].  
46..60

MDAHRGAPPAGQQVVHVRGDSKTELEALFNAV MNPSKATRQPPSVPMRMRKFPDSFFKPPEPRGHSRQA  
SSDGGLCGSLAPHHVRAHSSPASLPVNSLSAQADADAAAATPIIPDDVPLPDGWEMAKTSTGQRYFINHVHRTTTW  
QDPRLSQLQSAAAQHQIACTPSHAHSFSNPAPTTQPKNIVPETAPKVNPAIILSLAMQQRLEKLRLKQGIPPOFAP  
QLNETKHTRIQQVQEAGGSNQMPGGMDHRSQAQMLVPSVDIRIRALNQEPNLNGAHSRNESTDSGLSVSSLSRTSD  
HMLSSVDHMDTGDSSEPPSMGLQESMPVLPINEDLMPGIPDLSLSDMLMEMDTVLSGPHMDRDSLTLTWL  
PMRMRKFPDSFFKPP

rs:XP\_005796947 [XP\_005796947] protein **FAM181B** [Xiphophorus maculatus].  
246..260

MQVVGHKQRVKFPGFPSLLLLFDVLTSSVLPERSPSSSSVAVTSSLDCLWLKHEQHQQVFIIRRTKSCF  
EETFSSGITVDATGVAAGLDRVMAVQTAIMNPQFMSFCFPDSVMEYDVEKSLDGSLLC EAENDEDFKETTRDLS  
FIDSASSNIKLALDKPVKSKRKNVHRKYLQKQIKRCTGIITPGNTSEAPVKRQGS PVSQQGPVQSKTLQKREGGQ  
ANLQSKSLAALFSPVKEIRGEKAKKPPMRHRNLPPSFFTEPANCSRVSSTSGMTLKD LERGNPEAADFFELLGPD  
YSNMVNEQDIYQGVPLRGQPD LGGLDPASYDHLVGGLLYTEPWTNCSGQCKK PSEGLRSGPPQPPVYSQAEDT SV  
PLDDNGLCTLTFFNFFPDCSISQVTYDLNGGYNKTHFSCL PMRHRNLPPSFFTEP

rs:XP\_023207215 [XP\_023207215] transcriptional coactivator YAP1 isoform X1 [Xiphophorus maculatus].>tr:A0A3B5QAT5\_XIPMA [A0A3B5QAT5] SubName: Full=Yes-associated protein 1 {ECO:0000313|Ensembl:ENSXMAP00000027369}; 45..59

MDPNQHNPPAGHQIVHVRGDSQTDLELLFNFSVMNPKTSNVPPSVPMRMRKLPDSFFKPPPEPKSHSRQAS  
TDAGSGGVLTPHHVRAHSSPASLQLGAVSGGSLSGMASAGASPOHLRQASYEIPDDVPLPAGWEMAKTNSGQRYF  
LKLQNSEKEQDISSHNEKTTTQDPRKSLLOMNQAPVPPSSVPVQPQNLMPASGSLPEGWEQAVTQEGEIIYYI  
NHTNKTTSWLDRLEPRYALNQQLTQSAPGKQSGQLPSSTHGGVMGGNNQLRLQQIEKERLRLQQHRPQELALR  
NQLPTSMDQDGSSTNPVSSPLAQDARTMTVNSSDPFLNSGTYHSRDESTDSGLSMSSYSVPRTPDFFLNSVDEMDT  
GDPLPASIASQPSRFPDYLDIIPGTDVDLGTLEGENMAVEGEELMASLQEPLSSDILSDMESVLAATKIDKENFL  
TWL PMRMRKLPDSFFKPP

rs:XP\_005796894 [XP\_005796894] transcriptional coactivator YAP1 isoform X2 [Xiphophorus maculatus].>tr:M3ZZC2\_XIPMA [M3ZZC2] SubName: Full=Yes-associated protein 1 {ECO:0000313|Ensembl:ENSXMAP00000007566}; 45..59

MDPNQHNPPAGHQIVHVRGDSQTDLELLFNFSVMNPKTSNVPPSVPMRMRKLPDSFFKPPPEPKSHSRQAS  
TDAGSGGVLTPHHVRAHSSPASLQLGAVSGGSLSGMASAGASPOHLRQASYEIPDDVPLPAGWEMAKTNSGQRYF  
LNHNEKTTTQDPRKSLLOMNQAPVPPSSVPVQPQNLMPASGSLPEGWEQAVTQEGEIIYYINHTNKTTSWLDR  
RLEPRYALNQQLTQSAPGKQSGQLPSSTHGGVMGGNNQLRLQQIEKERLRLQQHRPQELALRNQLPTSMDQDGS  
TNPVSSPLAQDARTMTVNSSDPFLNSGTYHSRDESTDSGLSMSSYSVPRTPDFFLNSVDEMDTGDPLPASIASQ  
SRFPDYLDIIPGTDVDLGTLEGENMAVEGEELMASLQEPLSSDILSDMESVLAATKIDKENFLTWL  
PMRMRKLPDSFFKPP

rs:XP\_005801202 [XP\_005801202] protein **FAM181A** [Xiphophorus maculatus]. 102..116

MSSADSEVKLLNFVNLAASSDIKAALDKSAPCRRSVDHRKYLQKQLKRFSQKFSRVPRGQSLTSADNRC  
ARGAERQRATATDQASSDAQHAQSVGGGLMDQVPMRKRQLPASFWEEPRLTKARRDKPFLDLRRSSSSSGTSDGGEN  
EKRRRSQEDAQKTANSSSGRRSSAEKEVLKLDLTSRHSVSFCSCCPQFQFHGHQVLHSQIVVPHPPFGLWSKAAEP  
QRSEHPYQKQLHTHVVKPIPTKATAQSPIFSVFGFI PMRKRQLPASFWEEP

rs:XP\_023227613 [XP\_023227613] uncharacterized protein LOC111628119 [Centruroides sculpturatus]. 135..149

MSGKRKPFVSSPKSVDSEVEEDFSSGSSSARGKDGSKLVDYDDVGSPPSGSSTASGPVYVRTPGFENHG  
HSVRVKPPQSRRGSYESQKDGKEAIQTQGGSSCKKKKNSIISIHDMSCLQEKQTHKSKQRKEPLPMKLRALPQS  
FWQQPNNASNVSPAIVVPMPLPPLFKHDTADDVTKVRPVTPEEREKGSATSTRSEGSRIIRVSNDDLHKLFDGI  
NEKDKQMAPVVRGRPKKIPSTLNQRTLREGEDPCLVSTATEGILPLLNLDREGNKNSTQTLTLVSIIRDGKSVTL  
PALNVEQNYSQLSELVVRL PMKLRALPQSFQQP

rs:XP\_023241799 [XP\_023241799] transcription cofactor vestigial-like protein 2 isoform X1 [Centruroides sculpturatus]. 104..118

MTCIDIMYQPYAQYFYPYQRPTIQPSLADTKKYGDPMTTDYSESNQSKDRKYCGDTHFLSANCMVVITYK  
GDISSVVDEHFTRALSQTGSYAPDPGKGYCKDGPMPMSQRNFPPSFWNQPATQALGSAGHPPDLSYTDYPHAGTLH  
TSLHQGDPPWHYTLAPPTSAYRPELTYPANRFSPOYGSFLLQPSVRTTTLNPNVAGSCTALDKSTDTWGAARYTD  
TLTHNLGHMETNYGAAYSMPGMTMSDATSGNYMFELYKMHAPRSCR PMSQRNFPPSFWNQP

rs:XP\_023241800 [XP\_023241800] transcription cofactor vestigial-like protein 2 isoform X2 [Centruroides sculpturatus]. 104..118

MPTPDWHFSLGAGVTLYLCNARSNSWRKVDKYGDPMTTDYSESNQSKDRKYCGDTHFLSANCMVVITYK  
GDISSVVDEHFTRALSQTGSYAPDPGKGYCKDGPMPMSQRNFPPSFWNQPATQALGSAGHPPDLSYTDYPHAGTLH  
TSLHQGDPPWHYTLAPPTSAYRPELTYPANRFSPOYGSFLLQPSVRTTTLNPNVAGSCTALDKSTDTWGAARYTD  
TLTHNLGHMETNYGAAYSMPGMTMSDATSGNYMFELYKMHAPRSCR PMSQRNFPPSFWNQP

rs:XP\_023241801 [XP\_023241801] transcription cofactor vestigial-like protein 2 isoform X3 [Centruroides sculpturatus]. 104..118

MTCIDIMYQPYAQYFYPYQRPTIQPSLADTKKYGDPMTTDYSESNQSKDRKYCGDTHFLSANCMVVITYK  
GDISSVVDEHFTRALSQTGSYAPDPGKGYCKDGPMPMSQRNFPPSFWNQPATQALGSAGHPPDLSYTDYPHAGTLH  
TSLHQGDPPWHYTLAPPTSAYRPELTYPANRFSPOYGSFLLQPSVRTTTLNPNVAGSCTALDKSTDTWGAARYTD  
TLTHNLGHMETNYGAAYSMPGMTMSGLESQVADASKDLYWF PMSQRNFPPSFWNQP



rs:XP\_023241802 [XP\_023241802] transcription cofactor vestigial-like protein 2 isoform X4 [Centruroides sculpturatus].>rs:XP\_023241803 [XP\_023241803] transcription cofactor vestigial-like protein 2 isoform X4 [Centruroides sculpturatus]. 69..83

MTTDYSESNQSKDRKYCGDTHFLSANCMVVTTYKGDISSVVDEHFTRALSQTGSYAPDPGKGYCKDGPP  
MSQRNFPPSFWNQPATQALGSAGHPPDLSTDPYHAGTLHTSLHQGDPWHYTLASAPPTSAYRPELTYPSANRFSP  
QYGSFLLQPSVRTTRLNPFVAGSCTALDKSTDTWGAARYTDTLTHNLGHMETNYGAAYSMPGMTSDATSGNYMFEL  
YKMHAPRSCR PMSQRNFPPSFWNQP

rs:XP\_023210095 [XP\_023210095] transcriptional coactivator YAP1-like [Centruroides sculpturatus]. 46..60

MSQQRDVIEQKGNQIVRINSDSKTDLDDLKFAVMQPKDSQVPQSVPMRMRNLPPSFFKQPDRGSKSASH  
SRESSTDATYSGPPPPTQQQQRGLTINHPRANSSPATLQQTYTANRQTTSPHQHLRQQSFEISDDVPLPSGWEMA  
KTPSGQRYFLNHITQTTTWEDPRKLNLAATLHPSVSHTSVVSPTASTLSSHSPTSAGPPITLHNLGPLEGWDQA  
TTPEGEVYFINHIDRTTSLWLDPRIPAHLQRPVLLSRSGHSQLPSPHSVQGGTQVQPSSTPSITSQTLTVQSNIAAG  
GISPTITTTSGTTNNQTNLQFQQKMRHLKQLQVERERLRVRQOEILRQEMILRRNIGEEMI IPTSPPGSNTLPPA  
NTTTTGMDPFLGGNDFHARQESGDSGLGLGNYSLPHTPEDFLMEDNEDTGNNDTVQQNNDLGFDSLQSSNLDLG  
TENMDSDDLVPSLQEEELNADILSDVEALLDSPNKDSVLTWL PMRMRNLPPSFFKQP

rs:XP\_023212895 [XP\_023212895] uncharacterized protein LOC111615695 [Centruroides sculpturatus]. 27..41

MEKENKSEKISSSVEDSKEDEAVASVPLRQRFPASFWQEPSRLPEKWLYVSQVFNQNGSSAFVVSQTN  
VSVMSRPSSSGMVNCPSCACKTPFYYPWRWTVPYCQTIIVSHYPYSFYPNVSPQCCHPCKICDSRPFESRKSFRY  
PV PLRQRFPASFWQEP

rs:XP\_003756204 [XP\_003756204] protein **FAM181A** [Sarcophilus harrisii].>tr:G3VUJ0\_SARHA [G3VUJ0] SubName: Full=Family with sequence similarity 181 member A {ECO:0000313|Ensembl:ENSSHAP0000006845}; 118..132

MASDSEVKMLLNFNVLASSDIKAALDKSAPCRRSVDHRKYLQKQLKRFSQKYSRLPRCYPNRSGESHPK  
RGPEDGRCRTPSNGSTKPGNPEMEENFPEEQALQEIQPEASRPDQVPMRKRQLPASFWEEPRAQSYSGGLDG  
LPVHREVPAYEGKSKKRLETLGSETAPVPASPRAEKESPKVPSASLMGRMSAWSCCFQYHGQPIYQSPGGLPQ  
SPVPSLGLWRKSPSSPGEIGHFCKEPGSPSQKVYRPVVLKPIPTKPGVPPPIFNVFSYI  
PMRKRQLPASFWEEP

rs:XP\_003764324 [XP\_003764324] LOW QUALITY PROTEIN: transcriptional coactivator YAP1 [Sarcophilus harrisii]. 88..102

MDPGQQPPQPPSQGQGGQPPSQPPQGGQGPPTGPGQPAPPGAPGSQAAPPPPAGHQIVHVRGDSETDLE  
ALFNAMNPKTANVPQTVPMRLRKLKLPDSFFKPPPEPKSHSRQASTDAGTAGALTPQHVAHSSPASLQLGAVSPGT  
LSPSGVVSAPGAAPSGQHLRQSSFEIPDDVPLPAGWEMAKTSSGQRYFLNHIDQTTTWQDPRKAMLSQMNVTAPT  
SPPVQONIMNSASGPLPDGWEQAMTQDGEIYYINHKNKTTSLWLDPRLDPRFAMNQRIQSAPVKQPPPLAPQSPQ  
GSVMGGGSSNQQQMRLQQLQVEKERLRLKHQELLRQALRNVPSTANSPKRQEIALLRSQLPTEQDGGTQNPVS  
SPGMNQLRMTTNSDPLNSGTYHSRDESTDSGLSMSSYSVPRTPDFFLNSVDEMDTGDSISQSNIPSQNR  
PDYLEAIPGTNVDLGTLEGDGMNIEGEEELMPSLQEQALSSDILNDMESVLAATKLDKESFLTWL  
PMRLRKLKLPDSFFKPP

rs:XP\_023353609 [XP\_023353609] uncharacterized protein LOC100922283 [Sarcophilus harrisii]. 214..228

MAAGVIRNLCDFRLQAAFHQPFLLPTSGHRDPDFPETSEEEEEEDGEEEEEGEKLGDNLLELAGSNPGCQRS  
DQNLITGPTRSSPSSAEMTLQLLRFSELISCDIQKYFGQKTKDDDPDACNIYEDCRPPGKSARELYYADLMQIVQ  
SGDQEDEDTDVVGLPKGLDCPARFISRRDRSQKLGPLVELFEYGLCQYARQVRVSDSRRLRLEKKYGHITPMHKRK  
LPQSFWKEPAPSSCLLNTSTPDFSDLLANWTSOVAQELHGVGGRELDRALEMDQLEEV  
PMHKRKLKLPQSFWKEP

rs:XP\_005008579 [XP\_005008579] LOW QUALITY PROTEIN: protein **FAM181A** [Cavia porcellus]. 133..147

MASDSVDMMLLNFNVLASSDIKAALDKSAPCRRSVDHRKYLQKQLKRFSQKYSRLPRGXPGRAAEPLHR  
RGPEDHPEQLPLHPSIPCGPDSSPGGIGGCKEKALGSPFGEEYLSKEQTLQGGQPGAAANLQVPMRKRQLPASFW  
EPRPHTSYPMGLEGGPDREGLLYECKKNCKGLESVVPEAAPGPLSPRALADKEPLKMPGVSLVGRVDANWYCP

FQYHGQPIYPGPPGALPASPIPLGLWSKSPALPTELAHFCKHVDGPGQKVYRPVVLKPIPTKPAVPPPLFNVFG  
YL PMRKRQLPASFWEEP

rs:XP\_011367726 [XP\_011367726] transcriptional coactivator YAP1 isoform  
X1 [Pteropus vampyrus]. 85..99

MDPGQQPPPQPAPQGQGGQPPAQPPQGGQPPSGPGQPAPPGSQAASQAPPAGHQIVHVRGDSETDLEALF  
NAVMNPKTANVPQTVPMRLRKLKLPDSFFKPPPEPKSHSRQASTDAGTAGALTPQHVRHSSPASLQLGAVSPGALTP  
TGVVSGPAPTPTAQHLRQSSFEIPDDVPLPAGWEMAKTSSGQRYFLNHIDQTTTWQDPRKAMLSQMNVTAPTSPP  
VQQNMMNSASGPLPDGWEQAMTQDGEIYYINHKNKTTSWLDPRLDPRFGKAMNQRISQSAPVKQPPPLAPQSPQG  
GVMGGGNSNQQQMRLQQLQMEKERLRLKQOELLRQVRPQAMRNINPSTANSKQELALRSQLEQDGGTQNPV  
PVSSPGMSQELRTMTTNSSDPFLNSGTYHSRDESTDSGLSMSSYSVPRTPDFFLNSVDEMDTGDSINQSTLPSQQ  
NRFPDYLEAIPGTNVDLGTLEGDGMNIEGEELMPSLQEQALSSDILNDMESVLAATKLDKESFLTWL  
PMRLRKLKLPDSFFKPP

rs:XP\_011367727 [XP\_011367727] transcriptional coactivator YAP1 isoform  
X2 [Pteropus vampyrus]. 85..99

MDPGQQPPPQPAPQGQGGQPPAQPPQGGQPPSGPGQPAPPGSQAASQAPPAGHQIVHVRGDSETDLEALF  
NAVMNPKTANVPQTVPMRLRKLKLPDSFFKPPPEPKSHSRQASTDAGTAGALTPQHVRHSSPASLQLGAVSPGALTP  
TGVVSGPAPTPTAQHLRQSSFEIPDDVPLPAGWEMAKTSSGQRYFLNHIDQTTTWQDPRKAMLSQMNVTAPTSPP  
VQQNMMNSASGPLPDGWEQAMTQDGEIYYINHKNKTTSWLDPRLDPRFAMNQRISQSAPVKQPPPLAPQSPQGGV  
MGGGNSNQQQMRLQQLQMEKERLRLKQOELLRQVRPQAMRNINPSTANSKQELALRSQLEQDGGTQNPV  
SSPGMSQELRTMTTNSSDPFLNSGTYHSRDESTDSGLSMSSYSVPRTPDFFLNSVDEMDTGDSINQSTLPSQQNR  
FPDYLEAIPGTNVDLGTLEGDGMNIEGEELMPSLQEQALSSDILNDMESVLAATKLDKESFLTWL  
PMRLRKLKLPDSFFKPP

rs:XP\_011367728 [XP\_011367728] transcriptional coactivator YAP1 isoform  
X3 [Pteropus vampyrus]. 85..99

MDPGQQPPPQPAPQGQGGQPPAQPPQGGQPPSGPGQPAPPGSQAASQAPPAGHQIVHVRGDSETDLEALF  
NAVMNPKTANVPQTVPMRLRKLKLPDSFFKPPPEPKSHSRQASTDAGTAGALTPQHVRHSSPASLQLGAVSPGALTP  
TGVVSGPAPTPTAQHLRQSSFEIPDDVPLPAGWEMAKTSSGQRYFLNHIDQTTTWQDPRKAMLSQMNVTAPTSPP  
VQQNMMNSASGPLPDGWEQAMTQDGEIYYINHKNKTTSWLDPRLDPRFGKAMNQRISQSAPVKQPPPLAPQSPQG  
GVMGGGNSNQQQMRLQQLQMEKERLRLKQOELLRQVRPQAMRNINPSTANSKQELALRSQLEQDGGTQNPVSS  
PGMSQELRTMTTNSSDPFLNSGTYHSRDESTDSGLSMSSYSVPRTPDFFLNSVDEMDTGDSINQSTLPSQQNRFP  
DYLEAIPGTNVDLGTLEGDGMNIEGEELMPSLQEQALSSDILNDMESVLAATKLDKESFLTWL  
PMRLRKLKLPDSFFKPP

rs:XP\_011367730 [XP\_011367730] transcriptional coactivator YAP1 isoform  
X4 [Pteropus vampyrus]. 85..99

MDPGQQPPPQPAPQGQGGQPPAQPPQGGQPPSGPGQPAPPGSQAASQAPPAGHQIVHVRGDSETDLEALF  
NAVMNPKTANVPQTVPMRLRKLKLPDSFFKPPPEPKSHSRQASTDAGTAGALTPQHVRHSSPASLQLGAVSPGALTP  
TGVVSGPAPTPTAQHLRQSSFEIPDDVPLPAGWEMAKTSSGQRYFLNHIDQTTTWQDPRKAMLSQMNVTAPTSPP  
VQQNMMNSASGPLPDGWEQAMTQDGEIYYINHKNKTTSWLDPRLDPRFAMNQRISQSAPVKQPPPLAPQSPQGGV  
MGGGNSNQQQMRLQQLQMEKERLRLKQOELLRQVRPQELALRSQLEQDGGTQNPVSSPG  
MSQELRTMTTNSSDPFLNSGTYHSRDESTDSGLSMSSYSVPRTPDFFLNSVDEMDTGDSINQSTLPSQQNRFPDY  
LEAIPGTNVDLGTLEGDGMNIEGEELMPSLQEQALSSDILNDMESVLAATKLDKESFLTWL  
PMRLRKLKLPDSFFKPP

rs:XP\_011367731 [XP\_011367731] transcriptional coactivator YAP1 isoform  
X5 [Pteropus vampyrus]. 85..99

MDPGQQPPPQPAPQGQGGQPPAQPPQGGQPPSGPGQPAPPGSQAASQAPPAGHQIVHVRGDSETDLEALF  
NAVMNPKTANVPQTVPMRLRKLKLPDSFFKPPPEPKSHSRQASTDAGTAGALTPQHVRHSSPASLQLGAVSPGALTP  
TGVVSGPAPTPTAQHLRQSSFEIPDDVPLPAGWEMAKTSSGQRYFLNHIDQTTTWQDPRKAMLSQMNVTAPTSPP  
VQQNMMNSASGPLPDGWEQAMTQDGEIYYINHKNKTTSWLDPRLDPRFGKAMNQRISQSAPVKQPPPLAPQSPQG  
GVMGGGNSNQQQMRLQQLQMEKERLRLKQOELLRQVRPQELALRSQLEQDGGTQNPVSSPGMSQELRTMTT  
NSSDPFLNSGTYHSRDESTDSGLSMSSYSVPRTPDFFLNSVDEMDTGDSINQSTLPSQQNRFPDYLEAIPGTNVD  
LGTLEGDGMNIEGEELMPSLQEQALSSDILNDMESVLAATKLDKESFLTWL PMRLRKLKLPDSFFKPP

rs:XP\_011367732 [XP\_011367732] transcriptional coactivator YAP1 isoform  
X6 [Pteropus vampyrus]. 85..99

MDPGQQPPPQPAPQGQGQPPAQPPQGQGGPPSGPGQPAPPGSQAASQAPPAGHQIVHVRGDSETDLEALF  
NAVMPKPTANVPQTVPMRLRKLKLPDSFFKPPEPKSHSRQASTDAGTAGALTPQHVRHSSPASLQLGAVSPGALTP  
TGVVSGPAPTPTAQHLRQSSFEIPDDVPLPAGWEMAKTSSGQRYFLNHIDQTTTWQDPRKAMLSQMNVTAPTSPP  
VQQNMMNSASGPLPDGWEQAMTQDGEIYYINHKNTTSLWLDPRLDPRFAMNQRISQSAPVKQPPPLAPQSPQGGV  
MGGGNSNQQQMRLQQLQMEKERLRLKQOELLRQELALRSQLPTLEQDGGTQNPVSSPGMSQELRTMTTNS  
SDPFLNSGTYHSRDESTDSGLSMSSYSVPRTPDDFLNSVDEMDTGDSINQSTLPSQQNRFPDYLEAIPGTNVDLG  
TLEGDMNIEGEEELMPSLQEQALSSDILNDMESVLAATKLDKESFLTWL PMRLRKLKLPDSFFKPP

rs:XP\_011367733 [XP\_011367733] transcriptional coactivator YAP1 isoform  
X7 [Pteropus vampyrus]. 85..99

MDPGQQPPPQPAPQGQGQPPAQPPQGQGGPPSGPGQPAPPGSQAASQAPPAGHQIVHVRGDSETDLEALF  
NAVMPKPTANVPQTVPMRLRKLKLPDSFFKPPEPKSHSRQASTDAGTAGALTPQHVRHSSPASLQLGAVSPGALTP  
TGVVSGPAPTPTAQHLRQSSFEIPDDVPLPAGWEMAKTSSGQRYFLNHIDQTTTWQDPRKAMLSQMNVTAPTSPP  
VQQNMMNSASGPLPDGWEQAMTQDGEIYYINHKNTTSLWLDPRLDPRFGKAMNQRISQSAPVKQPPPLAPQSPQG  
GVMGGGNSNQQQMRLQQLQMEKERLRLKQOELLRQELALRSQLPTLEQDGGTQNPVSSPGMSQELRTMTTNSSD  
PFLNSGTYHSRDESTDSGLSMSSYSVPRTPDDFLNSVDEMDTGDSINQSTLPSQQNRFPDYLEAIPGTNVDLGT  
EGDGMNIEGEEELMPSLQEQALSSDILNDMESVLAATKLDKESFLTWL PMRLRKLKLPDSFFKPP

rs:XP\_011367734 [XP\_011367734] transcriptional coactivator YAP1 isoform  
X8 [Pteropus vampyrus]. 85..99

MDPGQQPPPQPAPQGQGQPPAQPPQGQGGPPSGPGQPAPPGSQAASQAPPAGHQIVHVRGDSETDLEALF  
NAVMPKPTANVPQTVPMRLRKLKLPDSFFKPPEPKSHSRQASTDAGTAGALTPQHVRHSSPASLQLGAVSPGALTP  
TGVVSGPAPTPTAQHLRQSSFEIPDDVPLPAGWEMAKTSSGQRYFLNHIDQTTTWQDPRKAMLSQMNVTAPTSPP  
VQQNMMNSASGPLPDGWEQAMTQDGEIYYINHKNTTSLWLDPRLDPRFAMNQRISQSAPVKQPPPLAPQSPQGGV  
MGGGNSNQQQMRLQQLQMEKERLRLKQOELLRQELALRSQLPTLEQDGGTQNPVSSPGMSQELRTMTTNSSDPF  
LNSGTYHSRDESTDSGLSMSSYSVPRTPDDFLNSVDEMDTGDSINQSTLPSQQNRFPDYLEAIPGTNVDLGTLEG  
DGMNIEGEEELMPSLQEQALSSDILNDMESVLAATKLDKESFLTWL PMRLRKLKLPDSFFKPP

rs:XP\_011367735 [XP\_011367735] transcriptional coactivator YAP1 isoform  
X9 [Pteropus vampyrus]. 85..99

MDPGQQPPPQPAPQGQGQPPAQPPQGQGGPPSGPGQPAPPGSQAASQAPPAGHQIVHVRGDSETDLEALF  
NAVMPKPTANVPQTVPMRLRKLKLPDSFFKPPEPKSHSRQASTDAGTAGALTPQHVRHSSPASLQLGAVSPGALTP  
TGVVSGPAPTPTAQHLRQSSFEIPDDVPLPAGWEMAKTSSGQRYFLNHIDQTTTWQDPRKAMLSQMNVTAPTSPP  
VQQNMMNSASAMNQRISQSAPVKQPPPLAPQSPQGGVMGGGNSNQQQMRLQQLQMEKERLRLKQOELLRQVRPQ  
AMRNINPSTANSPKCQELALRSQLPTLEQDGGTQNPVSSPGMSQELRTMTTNSSDPFLNSGTYHSRDESTDSGLS  
MSSYSVPRTPDDFLNSVDEMDTGDSINQSTLPSQQNRFPDYLEAIPGTNVDLGTLEGDMNIEGEEELMPSLQEQAL  
SSDILNDMESVLAATKLDKESFLTWL PMRLRKLKLPDSFFKPP

rs:XP\_011367736 [XP\_011367736] transcriptional coactivator YAP1 isoform  
X10 [Pteropus vampyrus]. 85..99

MDPGQQPPPQPAPQGQGQPPAQPPQGQGGPPSGPGQPAPPGSQAASQAPPAGHQIVHVRGDSETDLEALF  
NAVMPKPTANVPQTVPMRLRKLKLPDSFFKPPEPKSHSRQASTDAGTAGALTPQHVRHSSPASLQLGAVSPGALTP  
TGVVSGPAPTPTAQHLRQSSFEIPDDVPLPAGWEMAKTSSGQRYFLNHIDQTTTWQDPRKAMLSQMNVTAPTSPP  
VQQNMMNSASAMNQRISQSAPVKQPPPLAPQSPQGGVMGGGNSNQQQMRLQQLQMEKERLRLKQOELLRQAMRN  
INPSTANSPKCQELALRSQLPTLEQDGGTQNPVSSPGMSQELRTMTTNSSDPFLNSGTYHSRDESTDSGLSMSSY  
SVPRTPDDFLNSVDEMDTGDSINQSTLPSQQNRFPDYLEAIPGTNVDLGTLEGDMNIEGEEELMPSLQEQALSSDI  
LNDMESVLAATKLDKESFLTWL PMRLRKLKLPDSFFKPP

rs:XP\_011367737 [XP\_011367737] transcriptional coactivator YAP1 isoform  
X11 [Pteropus vampyrus]. 85..99

MDPGQQPPPQPAPQGQGQPPAQPPQGQGGPPSGPGQPAPPGSQAASQAPPAGHQIVHVRGDSETDLEALF  
NAVMPKPTANVPQTVPMRLRKLKLPDSFFKPPEPKSHSRQASTDAGTAGALTPQHVRHSSPASLQLGAVSPGALTP  
TGVVSGPAPTPTAQHLRQSSFEIPDDVPLPAGWEMAKTSSGQRYFLNHIDQTTTWQDPRKAMLSQMNVTAPTSPP  
VQQNMMNSASAMNQRISQSAPVKQPPPLAPQSPQGGVMGGGNSNQQQMRLQQLQMEKERLRLKQOELLRQVRPQ  
ELALRSQLPTLEQDGGTQNPVSSPGMSQELRTMTTNSSDPFLNSGTYHSRDESTDSGLSMSSYSVPRTPDDFLNS  
VDEMDTGDSINQSTLPSQQNRFPDYLEAIPGTNVDLGTLEGDMNIEGEEELMPSLQEQALSSDILNDMESVLAATK  
LDKESFLTWL PMRLRKLKLPDSFFKPP

rs:XP\_011367738 [XP\_011367738] transcriptional coactivator YAP1 isoform X12 [Pteropus vampyrus]. 85..99

MDPGQQPPPPQAPQGGQPPAQQPPQGGQPPSGPGQPAPPGSQAASQAPPAGHQIVHVRGDSETDLEALF  
NAVMPKNTANVPQTPMRLRKLKLPDSFFKPPPEPKSHSRQASTDAGTAGALTPQHVRHSSPASLQLGAVSPGALTP  
TGVVSGPAPTPTAQHLRQSSFEIPDDVPLPAGWEMAKTSSGQRYFLNHIDQTTTWQDPRKAMLSQMNVTAPTSP  
VQQNMMNSASAMNQRIQSAPVKQPPPLAPQSPQGGVMGGNSNQOQQMRLQQLQMEKERLRLKQOELLRQELAL  
RSQLPTLEQDGGTQNPVSSPGMSQELRTMTTNSDDPFLNSGTYHSRDESTDSGLSMSSYSVPRTPDDFLNSVDEM  
DTGDSINQSTLPSQQNRFDPYLEAIPGTNVDLGTLEGDGMNIEGEEELMPSLQEQALSSDILNDMESVLAATKLDKE  
SFLTWL PMRLRKLKLPDSFFKPP

rs:XP\_011371422 [XP\_011371422] protein **FAM181B** [Pteropus vampyrus].  
221..235

MAVQAALLSTHPFVFPFGGGTPEGLGGAFGALDKGCCFEDDETGTAAAALLAGTEGGDVREATRDLLSF  
IDSASSNIKLALDKPGKSKRKNVHRKYLQKQIKRCSLGMGAAPPSPGAVDTPAKRVLAAPSAQTVAVPAHGK  
ATPRREASQAAAAASLQSRSLAALFDSLHHPGGAEPAGGSVAAPAAAGLGGAGAGGAGGDAAGPAGGTALPGCRK  
VPLRARNLPPSFFTEPSRAGGGSGCGPSGPGVSLGDLEKGADEVFFELLGPDYCACTETGVLLAAEPLDVFPFG  
AAVLRGPQELEPSLFEPPPAMVGSLLYPEPWSAPGCPPTKKNLAVPRGASTLNEPLRSLYPAAADSPPGGEDGTG  
LLASFAPFFSDCALSPPHQVSYDYSAGYGRATFSSLRWPDGVWEGAPGEEGAHRD PLRARNLPPSFFTEP

rs:XP\_023575457 [XP\_023575457] protein **FAM181A** [Octodon  
degus].>rs:XP\_004635202 [XP\_004635202] protein **FAM181A** [Octodon degus].  
179..193

MERLPMARLDSREFPDGSAVHPPRSCPPPQPPSSWKAPCRGPLVMASDSDVKMLLNFNVLASSDIKA  
ALDKSAPCRRSVDHRKYLQKQLKRFSQKYSRLPRGLPGRAAEPHLRRGPEDLPGRPLPHPSVPCGPDSSLG  
CKEKALGSSFGEECLSNESLQGLGAAKPGQVPMRKRQLPASFWEEPRTHSYPMGLEGGPGPREGPPYENKK  
NCQGLESMVPEAAPGMSPRALADKEPLKMPGVS LVGRVDAWSCCFQYHGQPIYPGPPGALPASPIPLGLLWRK  
SPALPAELAHFCKHVDGPGQKVHRPVVLKPIPTKPAVPPPIFNVFGYL PMRKRQLPASFWEEP

rs:XP\_004376749 [XP\_004376749] protein **FAM181A** [Trichechus manatus  
latirostris].>tr:A0A2Y9DLE0\_TRIMA [A0A2Y9DLE0] SubName: Full=protein  
**FAM181A** {ECO:0000313|RefSeq:XP\_004376749.1}; 130..144

MASDSDVKMLLNFNVLASSDIKAALDKSAPCRRSVDHRKYLQKQLKRFSQKYSRLPRGHPPGAAEPLHK  
RGPEDRPSRSLFDGQDPSPGGGGCKEKALGNLGREEFLSGEQEQTLOGQNPAAQPGQVPMRKRQLPASFWEEP  
RPAHSFPMGLEGLGREGPPYEGKKTCCQGLEPLGPEMAPVPLSPRALVEKEPLKMPGVSLMGRVNAWSCCFQY  
HGQPIYPGPPGALLQGSMPSLGLWRTSPASPGELAPFCKDVSLSGQKVYRPVVLKPIPTKPAVPPPIFNVFGYL  
PMRKRQLPASFWEEP

rs:XP\_023595577 [XP\_023595577] protein **FAM181B** [Trichechus manatus  
latirostris].>tr:A0A2Y9RM86\_TRIMA [A0A2Y9RM86] SubName: Full=protein  
**FAM181B** {ECO:0000313|RefSeq:XP\_023595577.1}; 213..227

MAVQAALLSPHPFVFPFGFAGAPDGLGGAFGALDKGCCFEDDETGAAPAGALLAGAEGGDVREATRDLLSF  
IDSASSNIKLALDKPGKSKRKNVHRKYLQKQIKRCSGLMGAAPPSPXXXXXXXXXXXXXXXXXXXXXXXXXXXX  
XXXXXASLQSRSLAALFDSLHRVPADEPARGAVTAPAVGSCGTGAGGTGGDAAGPTGGAVAPGARKIPLRARNL  
PPSFFTEPSRAGSGSGSPGGLSLGDLEKGAEEVFFELLGPDYAGTEAGVLLAAEPLDVFPAGAAALRGSLE  
LEPGLFEPPPAMVGSLLYPEPWSAPGPQIKKTPLAAARGGLTLNEPLRPLYAAAAADSPPGGEDGPGHLTSFAPFFP  
DCALPPPPPHQVSYDYSAGYSRTAYSSLWRPDGVWEEVPGEEGAHRD PLRARNLPPSFFTEP

rs:XP\_012413684 [XP\_012413684] transcriptional coactivator YAP1 isoform  
X1 [Trichechus manatus latirostris].>tr:A0A2Y9G046\_TRIMA [A0A2Y9G046]  
SubName: Full=transcriptional coactivator YAP1 isoform X1  
{ECO:0000313|RefSeq:XP\_012413684.1}; 85..99

MDPGQQPPPPQAPQGGQPPAQQPPQGGQPPSGPGQPAPRGSQAPQAPPAGHQIVHVRGDSETDLEALF  
NAVMPKNTANVPPTVPMRLRKLKLPDSFFKPPPEKSHNRQVSTDAGTAGALAPQHVRHSSPASLQLGAVSPGTLSP  
TGVVSGPAATPTAQHLRQSSFEIPDDVPLPAGWEMAKTSSGQRYFLNHIDQTTTWQDPRKAMLSQMNVTAPTSP  
VQQNMINASAGPLPDGWEQAMTQDGEIYYINHKNKTTSWLDPRLDPRFAINQRIQSAPVKQPPPLAPQSPGGV  
MGGNSNSNQOQQMRLQQLQMEKERLRLKQOELLRQVRPQAMRNINPSTANSKQELALRSQLPTLEQDGGTQNPV  
SSPGMSQELRTMTTNSDDPFLNSGTYHSRDESTDSGLSMSSYSVPRTPDDFLNSVDEMDTGDITINQSTLPSQQSR  
FPDYLEAIPGTNVDLGTLEGDGMNIEGEEELMPSLQEQALSSDILNDMESVLAATKLDKESFLTWL  
PMRLRKLKLPDSFFKPP

rs:XP\_004385920 [XP\_004385920] transcriptional coactivator YAP1 isoform X2 [Trichechus manatus latirostris].>tr:A0A2Y9E3U4\_TRIMA [A0A2Y9E3U4]  
SubName: Full=transcriptional coactivator YAP1 isoform X2  
{ECO:0000313|RefSeq:XP\_004385920.1}; 85..99  
MDPGQQPPPQPAPQGQGQPPAQPPQGQDPPSGPGQPAPRGSQGAPQAPPAGHQIVHVRGDSETDLEALF  
NAVMNPKTANVPPTVPMRLRKLKLPDSFFKPPPEPKSHNRQVSTDAGTAGALAPQHVRHSSPASLQLGAVSPGTLSP  
TGVVSGPAATPTAQHLRQSSFEIPDDVPLPAGWEMAKTSSGQRYFLNHIDQTTTWQDPRKAMLSQMNVTAPTSPP  
VQQNMINSASGPLPDGWEQAMTQDGEIYYINHKNKTTSWLDPRLDPRFAINQRISQSAPVKQPPPLAPQSPPGGV  
MGGSNSNQQQMRLQQLQMEKERLRLKQOELLRQAMRNINPSTANSKQELALRSQLPTLEQDGGTQNPVSSPG  
MSQELRTMTTNSDPFLNSGTYHSRDESTDSGLSMSSYSVPRTPDDFLNSVDEMMDTGDITINQSTLPSQQSRFPDY  
LEAIPGTNVDLGTLEGDGMNIEGEELMPSLQEQALSSDILNDMESVLAATKLDKESFLTWL  
PMRLRKLKLPDSFFKPP

rs:XP\_012413685 [XP\_012413685] transcriptional coactivator YAP1 isoform X3 [Trichechus manatus latirostris].>tr:A0A2Y9G3L9\_TRIMA [A0A2Y9G3L9]  
SubName: Full=transcriptional coactivator YAP1 isoform X3  
{ECO:0000313|RefSeq:XP\_012413685.1}; 85..99  
MDPGQQPPPQPAPQGQGQPPAQPPQGQDPPSGPGQPAPRGSQGAPQAPPAGHQIVHVRGDSETDLEALF  
NAVMNPKTANVPPTVPMRLRKLKLPDSFFKPPPEPKSHNRQVSTDAGTAGALAPQHVRHSSPASLQLGAVSPGTLSP  
TGVVSGPAATPTAQHLRQSSFEIPDDVPLPAGWEMAKTSSGQRYFLNHIDQTTTWQDPRKAMLSQMNVTAPTSPP  
VQQNMINSASGPLPDGWEQAMTQDGEIYYINHKNKTTSWLDPRLDPRFAINQRISQSAPVKQPPPLAPQSPPGGV  
MGGSNSNQQQMRLQQLQMEKERLRLKQOELLRQVPRQELALRSQLPTLEQDGGTQNPVSSPGMSQELRTMTTNS  
SDPFLNSGTYHSRDESTDSGLSMSSYSVPRTPDDFLNSVDEMMDTGDITINQSTLPSQQSRFPDYLEAIPGTNVDLGT  
LEGDGMNIEGEELMPSLQEQALSSDILNDMESVLAATKLDKESFLTWL PMRLRKLKLPDSFFKPP

rs:XP\_004385921 [XP\_004385921] transcriptional coactivator YAP1 isoform X4 [Trichechus manatus latirostris].>tr:A0A2Y9E2Q4\_TRIMA [A0A2Y9E2Q4]  
SubName: Full=transcriptional coactivator YAP1 isoform X4  
{ECO:0000313|RefSeq:XP\_004385921.1}; 85..99  
MDPGQQPPPQPAPQGQGQPPAQPPQGQDPPSGPGQPAPRGSQGAPQAPPAGHQIVHVRGDSETDLEALF  
NAVMNPKTANVPPTVPMRLRKLKLPDSFFKPPPEPKSHNRQVSTDAGTAGALAPQHVRHSSPASLQLGAVSPGTLSP  
TGVVSGPAATPTAQHLRQSSFEIPDDVPLPAGWEMAKTSSGQRYFLNHIDQTTTWQDPRKAMLSQMNVTAPTSPP  
VQQNMINSASGPLPDGWEQAMTQDGEIYYINHKNKTTSWLDPRLDPRFAINQRISQSAPVKQPPPLAPQSPPGGV  
MGGSNSNQQQMRLQQLQMEKERLRLKQOELLRQELALRSQLPTLEQDGGTQNPVSSPGMSQELRTMTTNSDPFL  
LNSGTYHSRDESTDSGLSMSSYSVPRTPDDFLNSVDEMMDTGDITINQSTLPSQQSRFPDYLEAIPGTNVDLGTLEG  
DGMNIEGEELMPSLQEQALSSDILNDMESVLAATKLDKESFLTWL PMRLRKLKLPDSFFKPP

rs:XP\_012413686 [XP\_012413686] transcriptional coactivator YAP1 isoform X5 [Trichechus manatus latirostris].>tr:A0A2Y9G2A5\_TRIMA [A0A2Y9G2A5]  
SubName: Full=transcriptional coactivator YAP1 isoform X5  
{ECO:0000313|RefSeq:XP\_012413686.1}; 85..99  
MDPGQQPPPQPAPQGQGQPPAQPPQGQDPPSGPGQPAPRGSQGAPQAPPAGHQIVHVRGDSETDLEALF  
NAVMNPKTANVPPTVPMRLRKLKLPDSFFKPPPEPKSHNRQVSTDAGTAGALAPQHVRHSSPASLQLGAVSPGTLSP  
TGVVSGPAATPTAQHLRQSSFEIPDDVPLPAGWEMAKTSSGQRYFLNHIDQTTTWQDPRKAMLSQMNVTAPTSPP  
VQQNMINSASAINQRISQSAPVKQPPPLAPQSPPGGVMGGSNSNQQQMRLQQLQMEKERLRLKQOELLRQVPRQ  
AMRNINPSTANSKQELALRSQLPTLEQDGGTQNPVSSPGMSQELRTMTTNSDPFLNSGTYHSRDESTDSGLS  
MSSYSVPRTPDDFLNSVDEMMDTGDITINQSTLPSQQSRFPDYLEAIPGTNVDLGTLEGDGMNIEGEELMPSLQEQAL  
SSDILNDMESVLAATKLDKESFLTWL PMRLRKLKLPDSFFKPP

rs:XP\_012413687 [XP\_012413687] transcriptional coactivator YAP1 isoform X6 [Trichechus manatus latirostris].>tr:A0A2Y9FZY2\_TRIMA [A0A2Y9FZY2]  
SubName: Full=transcriptional coactivator YAP1 isoform X6  
{ECO:0000313|RefSeq:XP\_012413687.1}; 85..99  
MDPGQQPPPQPAPQGQGQPPAQPPQGQDPPSGPGQPAPRGSQGAPQAPPAGHQIVHVRGDSETDLEALF  
NAVMNPKTANVPPTVPMRLRKLKLPDSFFKPPPEPKSHNRQVSTDAGTAGALAPQHVRHSSPASLQLGAVSPGTLSP  
TGVVSGPAATPTAQHLRQSSFEIPDDVPLPAGWEMAKTSSGQRYFLNHIDQTTTWQDPRKAMLSQMNVTAPTSPP  
VQQNMINSASAINQRISQSAPVKQPPPLAPQSPPGGVMGGSNSNQQQMRLQQLQMEKERLRLKQOELLRQAMRN  
INPSTANSKQELALRSQLPTLEQDGGTQNPVSSPGMSQELRTMTTNSDPFLNSGTYHSRDESTDSGLSMSSY

SVPRTPDDFLNSVDEMDTGDGTINQSTLPSQQSRFPDYLEAIPGTNVDLGTLEGDGMNIEGEEELMPSLQEQALSSDI  
LNDMESVLAATKLDKESFLTWL PMRLRKLPSFFKPP

rs:XP\_012413688 [XP\_012413688] transcriptional coactivator YAP1 isoform  
X7 [*Trichechus manatus latirostris*].>tr:A0A2Y9G017\_TRIMA [A0A2Y9G017]

SubName: Full=transcriptional coactivator YAP1 isoform X7

{ECO:0000313|RefSeq:XP\_012413688.1}; 85..99

MDPGQQPPPPQAPQGGQPPAQQPPQGDPPSGPGQPAPRGSQGAPQAPPAGHQIVHVRGDSETDLEALF  
NAVMNPKTANVPPTVPMRLRKLPSFFKPPPEPKSHNRQVSTDAGTAGALAPQHVRHSSPASLQLGAVSPGTLSP  
TGVVSGPAATPTAQHLRQSSFEIPDDVPLPAGWEMAKTSSGQRYFLNHIDQTTTWQDPRKAMLSQMNVTAPTSPP  
VQQNMINASAINQRISQSAPVKQPPPLAPQSPGGVMGGSNSNQQQMRLQQLQMEKERLRLKQQEQLLRQVRPQ  
ELALRSQLPTLEQDGGTQNPVSSPGMSQELRTMTTNSSDPFLNSGTYHSRDESTDSGLSMSSYSVPRTPDDFLNS  
VDEMDTGDGTINQSTLPSQQSRFPDYLEAIPGTNVDLGTLEGDGMNIEGEEELMPSLQEQALSSDI  
LNDMESVLAATKLDKESFLTWL PMRLRKLPSFFKPP

rs:XP\_004385922 [XP\_004385922] transcriptional coactivator YAP1 isoform  
X8 [*Trichechus manatus latirostris*].>tr:A0A2Y9E4A1\_TRIMA [A0A2Y9E4A1]

SubName: Full=transcriptional coactivator YAP1 isoform X8

{ECO:0000313|RefSeq:XP\_004385922.1}; 85..99

MDPGQQPPPPQAPQGGQPPAQQPPQGDPPSGPGQPAPRGSQGAPQAPPAGHQIVHVRGDSETDLEALF  
NAVMNPKTANVPPTVPMRLRKLPSFFKPPPEPKSHNRQVSTDAGTAGALAPQHVRHSSPASLQLGAVSPGTLSP  
TGVVSGPAATPTAQHLRQSSFEIPDDVPLPAGWEMAKTSSGQRYFLNHIDQTTTWQDPRKAMLSQMNVTAPTSPP  
VQQNMINASAINQRISQSAPVKQPPPLAPQSPGGVMGGSNSNQQQMRLQQLQMEKERLRLKQQEQLLRQELAL  
RSQLPTLEQDGGTQNPVSSPGMSQELRTMTTNSSDPFLNSGTYHSRDESTDSGLSMSSYSVPRTPDDFLNSVDEM  
DTGDGTINQSTLPSQQSRFPDYLEAIPGTNVDLGTLEGDGMNIEGEEELMPSLQEQALSSDI  
LNDMESVLAATKLDKESFLTWL PMRLRKLPSFFKPP

rs:XP\_023817148 [XP\_023817148] transcriptional coactivator YAP1 isoform  
X1 [*Oryzias latipes*].>tr:A0A3P9L2P7\_ORYLA [A0A3P9L2P7]

SubName: Full=Yes-associated protein 1

{ECO:0000313|Ensembl:ENSORLP00020014857};>tr:A0A0M3HEQ8\_ORYLA [A0A0M3HEQ8]

SubName: Full=Transcriptional coactivator YAP1

{ECO:0000313|Ensembl:ENSORLP00000003377}; 45..59

MDPSQHNPPVGHQIVHVRGDSETDLEALFNAVMNPKGAVVPQSVPMRMRKLPSFFKPPPEPKSHSRQAS  
TDAGSGGVLTPHHVRHSSPASLQLGAVSGGSLSGMASAGASPOHLRQSSYEIPDDVPLPPGWEMAKTSSGQRYF  
LNHIDQTTTWQDPRKALLQLNQATPPSTVPVQQNLLSPASGPLEGWEQAITPEGEIYYINHKNKTTSWLDPRL  
ETRYALNQQRITQSAPVKQGGPLPPNPHGGVMGNNQMRLQQMEKERIRLQEQELLRQSQRPQELALRNQLPTSM  
DQDGSNPVSSPMAQDARTMTANSNDPFLNSGTYHSRDESTDSGLSMSSYSVPRTPDDFLNSVDEMDTGDPLAPS  
MATQPSRFPDYLDITPGTDVDLGTLEGESMAVEGEEELMPSLQEQALSSDI  
LNDMESVLAATKIDKESFLTWL PMRMRKLPSFFKPP

rs:XP\_023817149 [XP\_023817149] transcriptional coactivator YAP1 isoform  
X2 [*Oryzias latipes*]. 45..59

MDPSQHNPPVGHQIVHVRGDSETDLEALFNAVMNPKGAVVPQSVPMRMRKLPSFFKPPPEPKSHSRQAS  
TDAGSGGVLTPHHVRHSSPASLQLGAVSGGSLSGMASAGASPOHLRQSSYEIPDDVPLPPGWEMAKTSSGQRYF  
LNHIDQTTTWQDPRKALLQLNQATPPSTVPVQQNLLSPASALNQQRITQSAPVKQGGPLPPNPHGGVMGNNQM  
RLQQMEKERIRLQEQELLRQSQRPQELALRNQLPTSMQDGSNPVSSPMAQDARTMTANSNDPFLNSGTYHSRD  
ESTDSGLSMSSYSVPRTPDDFLNSVDEMDTGDPLAPSMATQPSRFPDYLDITPGTDVDLGTLEGESMAVEGEEELM  
PSLQEQALSSDI  
LNDMESVLAATKIDKESFLTWL PMRMRKLPSFFKPP

rs:XP\_023817726 [XP\_023817726] protein **FAM181B** [*Oryzias latipes*].

155..169

MAVQTAIMNPQFMSFCFPGSVMEFDVEKSLDGSLLCEAEQDEDFKETTDRDLSFIDSASSNIKLALDKP  
VKSKRKNVHRKYLQKQIKRGTGIIITPGNGAETPVKRQSSPVSQSSLQNKVLPKRDGVQANLQSKSLAALFSPVK  
ELRGERAKKPLRHRNLPPSFFTEPANCSKVSPTSEVTLKDLERGPSDFFELLGPDYSSMVSDDLYPSVPLRMQ  
SELGGLDPASYDAHVVAAHLYTADPWTSCSGPSKKLGENPRAGPVQPPAYFQSEEASGGMDDNALCTLAFPNFFP  
DCSLPQVTYDLNSGYNRSSYSYL PLRHRNLPPSFFTEP

rs:XP\_023818352 [XP\_023818352] transcriptional coactivator YAP1 isoform X1 [Oryzias latipes].>tr:A0A3P9M061\_ORYLA [A0A3P9M061] SubName: Full=Uncharacterized protein {ECO:0000313|Ensembl:ENSORLP00020026432};>tr:H2LLU5\_ORYLA [H2LLU5] SubName: Full=Uncharacterized protein {ECO:0000313|Ensembl:ENSORLP00000007010}; 42..56

MDAHRSGRQVVHVRGDSQKELEALFSRVMPNSEASRQPSSVPMRMRKLPDSFFKPPPEPRGHSRQASSDG  
GVCGLSTPHHSRTVSAPAALPVNSLSTQAADVAATSIIIPDDVPLPPGWEMAKTPAGQRYFLNHLDKTTTWLDPRL  
SQLQSAQHPIANAPVHSHSFSNPAPTTQAQSVNPESGPLEGWQAVTPEGEMYIDHINKTTTWVDPRLAQKMS  
PGVLSLAMQRQEKLRCKQGAPPQVTQQEGAGRNQMSAGLDHDRSGQVLVPSVDARIRAPNHETAMNGAHSRNEST  
DSGLSVSSLPRTNDHMLSPVDHMDTGDPSEPPSMALQEPMLPMSEGEELMPCIEPEGLSSDLLMDMETVLSGSHMD  
RDNLLTLW PMRMRKLPDSFFKPP

rs:XP\_023818353 [XP\_023818353] transcriptional coactivator YAP1 isoform X2 [Oryzias latipes]. 42..56

MDAHRSGRQVVHVRGDSQKELEALFSRVMPNSEASRQPSSVPMRMRKLPDSFFKPPPEPRGHSRQASSDG  
GVCGLSTPHHSRTVSAPAALPVNSLSTQAADVAATSIIIPDDVPLPPGWEMAKTPAGQRYFLNHLDKTTTWLDPRL  
SQLQSAQHPIANAPVHSHSFSNPAPTTQAQSVNPESAQKMSPGVLSLAMQRQEKLRCKQGAPPQVTQQEGAGRNQ  
MSAGLDHDRSGQVLVPSVDARIRAPNHETAMNGAHSRNESTDSGLSVSSLPRTNDHMLSPVDHMDTGDPSEPPSM  
ALQEPMLPMSEGEELMPCIEPEGLSSDLLMDMETVLSGSHMDRDNLLTLW PMRMRKLPDSFFKPP

rs:XP\_004085278 [XP\_004085278] protein **FAM181A** [Oryzias latipes]. 103..117

MANADSEVKTLNLFVNLAASSDIKAALDKSAPCRRSVDHRKYLQKQLKRFSQKYSRAPRCHTHRSVDYKC  
AKPVGTVHQSATVSEKASSDVQDESAGSTVEQVPMRKRQLPASFWEEPKLTAENALMRLKGGSPAGMCEGSAKEK  
QKTVHVDKVPAPGRRSCTDKETLKMDLISPVLSVCSPPFQYHGQHVHSHIVVPHPLGLWSKAANDLGRPD  
HLYEQKIHTHVVKPIPTKPAAQTPIFSDFGLI PMRKRQLPASFWEEP

rs:XP\_024261059 [XP\_024261059] transcriptional coactivator YAP1-like, partial [Oncorhynchus tshawytscha]. 45..59

MDPSQHNPPAGHQIIHVRGDSETDLEALFNAVMPKNTIVPPSVPMRMRKLPDSFFKPPPEPKSHSRQTS  
TDAGTAGAIAPHHVRAHSSPASLQLGAVSPLLGMVPAGAPPSHLRQSSYEIPEDMPLPPGWEMAKTPSGQRYFLN  
HLDQSTTWLDPKALLQMNQAPPTSPVPVQQNIMSPASGPLPDCWEQAVTSEGEVYYINHITKTTSWLDPHLVQ  
SAVAQVKPSTLTSDPVGIATVVTKRRQQLQVEKDRLRRKQODLARP IRVQDVAVRSGLEHDGKMRNNHVDPALNG  
AHSRNQSTDSGLSVSSFTTRTPD DLLNTVE PMRMRKLPDSFFKPP

rs:XP\_024263547 [XP\_024263547] protein **FAM181B** [Oncorhynchus tshawytscha]. 176..190

MAVQTAIMNSPFVNFVFCFPGSVMMMEYDMGQSLDGSPLSEERGEYRETTRNLLSFIDSASSNIKLALDK  
PVKSKRKVNHRKYLQKQIKRCTGFISPTGNPAAAPGANKRKGSGFPTQTQTQIQPQTQLQTQPSPFQGGKPVHKK  
DGLQANLQTKSLAALFNSVKEPVKGERAKKPLRHRNLPPSFFTEPANTTTTSRVSTSTSGMFLGDLERGGNPDF  
FDLLGPDYSNMLSDQDVQTRGLPSRIIDQDMFQTRGLPSRILQHQQQTQDITDQVSPYDPHHLVGGFLYTEPWST  
SSPSKKAGEGVRTGPATQTPLYCQSGEGVRTGPGTQTPLYCQSGEGVRTGPGTQTPLYCHSVSDSSATGSTEDSN  
SLCTLAFNPFPCSVSVSYGLSCGGYNTKGFSSL PLRHRNLPPSFFTEP

rs:XP\_024265549 [XP\_024265549] transcriptional coactivator YAP1 [Oncorhynchus tshawytscha]. 45..59

MDPSQHNPPAGHQIIHVRGDSETDLEALFNAVMPKNTIVPPSVPMRMRKLPDSFFKPPPEPKSHSRQTS  
TDAGTAGAIAPHHVRAHSSPASLQLGAVSPLLGMVPAGAPPSHLRQSSYEIPEDMPLPPGWEMAKTPSGQRYFLN  
HLDQSTTWLDPKALLQMNQAPPTSPVPVQQNIMSPASGPLPDGWEQAGTSEGEIYYINHKNKTTSWLDPRLP  
CYSLNQQRITQSAPGKQGSQLPSSPQSGGVMGGSNQIKLQQLQMEKERLRLKHQELLRTRPQELALRNQLPTSME  
QDGGTLNPVSSPGMGQDARIMTTNSNDPFLNSGTYHSRDESTDSGLSMSSYSVPRTPDDFLNSVDSVPRTPDDFL  
NGVDEMGTGDSLVPVSMGTQPSRFPDYLDVPIPGTDVDLGMLENKSMAMEGEELMPSLQEQALSSDILNDMESVLAAT  
KMDKENFLTWL PMRMRKLPDSFFKPP

rs:XP\_002108065 [XP\_002108065] predicted protein [Trichoplax adhaerens].>tr:B3RLX5\_TRIAD [B3RLX5] SubName: Full=Predicted protein {ECO:0000313|EMBL:EDV28863.1}; 35..49

MDQKQPVVHERHDSKEELERLNFVNLNSQNNPTVPMRDRRLPYSFFQGPTRPYDSNNTTATLSTDNNGF

VGDSIVHPRIKSSPASFPYHNNNSDMTNSNNSAFQHRNQPLHPKHHSSSAAFRNENAHSNKSFPADVNYKNLINP  
NVAMRQLPMARFDDKCSIINCQTFSLKLLNYGIVCTWRPVQQNGLHIRGGSGSLHPNNGPMAKLPDQWWEKAFT  
PEGQVYFVNHITRTTSSWNDPRRSMMQAQSPNPVIQSPLKTTYDLNDKAMQELQMMQLERKHLEQKREEMLRKES  
EIKRQIETYQRQQIPVGRTEQLLHRPGLATTAAPNGIPNHNPLIKREPSSPSPMQIDYPTPQHNSLPTDIQANL  
SQGQMLNRYGGNISINNQLANGGFNNQIMSENNEPDIEELIQSLSTSAQDLIDIEATLIDRDAIAKIESDLVNTPEP  
DWY PMRDRRLPYSFFQGP

rs:XP\_017268811 [XP\_017268811] protein **FAM181A** [Kryptolebias marmoratus].  
109..123

MKQAKDLTNMASADSEVKTLNLFVNLAASSDIKAALDKSAPCRRSVDHRKYLQKQLKRFSQKYSRVPRCH  
AHTADYRCLKPTGAAHQSAEKAGSDAQDVENAGSVEQVPMRKRQLPASFWEEPRLSKTKRDKSCLKRSPAGTSD  
GGEKRKTIADDDAKASPSNRRSSADKEVLKLDVTSHHSVSVCGCCPLQYHGHVHLSHIVVPHPLGLWSKAAGT  
EEHPYGQRLHTHVVKPIPTKPTAQSPIFSVFGFI PMRKRQLPASFWEEP

rs:XP\_025079917 [XP\_025079917] uncharacterized protein LOC112555666  
[Pomacea canaliculata]. 231..245

MVLVSNVVCFEAPVIDLQILDNGIYISLPSVATASSTPRTTGGKRGPSGPLIVSSSSSEDEESDTNECLH  
PALQQQSNVRTDLLPRNGHILPPACLRSTVIGIDRLTSQLPSPRKDSNTACGTEISTSETEVETVLSNPTAEAH  
PSLNFAHEHDHDYDNTVSPSSSTSSGPIYVRPPGFKTHAQVVECIRSKLARKKSRPPAVITVKDELKHREETPLR  
RKHEEVKYRSTPMKLRALPQSFWQQPNLAQQVSPATMYPLLPCLCNKDTEEDIAEVRPVTTPNESGAETKRLAPE  
RKISVANTDLLFKLFENISDEKKTATVHLKRGRRPMPIKSCTKGLLFGNDPVLVDIAIDTLFPQLSIESSRFGG  
NTSLQLVTLGTGDKTVTLPSLTLEQNYPQMLSELVTHI PMKLRALPQSFWQQP

rs:XP\_025088359 [XP\_025088359] LOW QUALITY PROTEIN: mastermind-like  
domain-containing protein 1 [Pomacea canaliculata]. 156..170

MIAQPSVVLPLGALDRSQHRSQQASAPHQQQQNDTINLLQFIDMASSNIKLALDRPXKSKRKNVHRK  
YLQKQLKRCGSQSGKRSQSPRGEQSSGGGGGEPAAAGCSNLRCAKMTSQVGLQIKSLQALFDPKTESXQXLLHT  
PVGKSTLSPKAPLRCRNLPPSFFVEPGLRASDVPDRIGVMLSSDTGDVVGGSVREVRDPTQLQKTPHHTSPYLD  
GRCSVPFSALPTDTLESILGQADLSELLSGRWQQGRDSNHTPCDGSVGTSSPRSFSDSSDAYCTSSPRPSSTQSR  
SPSWSPCLPAGSLGSSFGTYMTPSLEEGVTGRHLDPPGGYFLQQQQHHQHHSMQPHHHQQPERLSHVAQLQPER  
HPADQPLLHQPOQTTLQTLPSQPVQHQQRHQQKQQQEHYKLSQDANI PADLIFRGDFVTPPTAYFHELPQQPHQ  
HLQQQHQQGFAETHELTLFPQIFPSGESGQGYNNGDFGSWQSLQPDSEFFPYMS PLRCRNLPPSFFVEP

rs:XP\_025079638 [XP\_025079638] transcriptional coactivator YAP1-A-like  
isoform X1 [Pomacea canaliculata]. 37..51

MSQERTSSHVVHVRENSASDLEALFDPHAAEAKKSIPLRDRNLPAFFQQPGLNQMGHGKNGPEVPGYN  
EVGPISHIRAHSSPASLQQTLSAAPQPPPPSQHLRQHSCDMLDEPLPPGWMARTPQGQRYFLNHVLQTTTWQDP  
RKSHPSNMGSTQQPGSPVSGTQSPNTMDITKMPLPLGWERAYTPEGEIYFINHIERTTSWFHPSIPAAQQRPG  
MRLHPQQQQQAALAPSPQQPQQASPLMRSPISGASSPPVPPGQHGPLTAEQQRQLKQKQKQMEKELLKKRQEEL  
ARQEMMIQLGAGGETTDTTADLTTVTDPLGQGTGSDHHSRQESADSGLGGMGTGYNLPRTPEDFLSNMEEMDIP  
DGGHKSQAQGDINMDIGSVGDVSDSHNMDSDDLVPVSLQEVIGTDLLRDVENVLSCNKADHLLTWL  
PLRDRNLPAFFQQP

rs:XP\_025079639 [XP\_025079639] transcriptional coactivator YAP1-A-like  
isoform X2 [Pomacea canaliculata]. 37..51

MSQERTSSHVVHVRENSASDLEALFDPHAAEAKKSIPLRDRNLPAFFQQPGLNQMGHGKNGPEVPGYN  
EVGPISHIRAHSSPASLQQTLSAAPQPPPPSQHLRQHSCDMLDEPLPPGWMARTPQGQRYFLNHVLQTTTWQDP  
RKSHPSNMGSTQQPGSPVSGTQSPNTMDITKMPLPLGWERAYTPEGEIYFINHIERTTSWFHPSIPAAQQRPGM  
RLHPQQQQQAALAPSPQQPQQASPLMRSPISGASSPPVPPGQHGPLTAEQQRQLKQKQKQMEKELLKKRQEEL  
RQEMMIQLGAGGETTDTTADLTTVTDPLGQGTGSDHHSRQESADSGLGGMGTGYNLPRTPEDFLSNMEEMDIP  
DGGHKSQAQGDINMDIGSVGDVSDSHNMDSDDLVPVSLQEVIGTDLLRDVENVLSCNKADHLLTWL  
PLRDRNLPAFFQQP

rs:XP\_025079640 [XP\_025079640] transcriptional coactivator YAP1-A-like  
isoform X3 [Pomacea canaliculata]. 37..51

MSQERTSSHVVHVRENSASDLEALFDPHAAEAKKSIPLRDRNLPAFFQQPGLNQMGHGKNGPEVPGYN  
EVGPISHIRAHSSPASLQQTLSAAPQPPPPSQHLRQHSCDMLDEPLPPGWMARTPQGQSHVLQTTTWQDPRKSH  
PSSNMGSTQQPGSPVSGTQSPNTMDITKMPLPLGWERAYTPEGEIYFINHIERTTSWFHPSIPAAQQRPGMRLH  
PQQQQQAALAPSPQQPQQASPLMRSPISGASSPPVPPGQHGPLTAEQQRQLKQKQKQMEKELLKKRQEELARQE



MMIQLGAGGETTDTTADLTTVTDPFLGQTGSTDHHSRQESADSGLGGMGTGYNLPRTPEDFLSNMEEMDIPDGGH  
KSQAQGFINDIGSVGDVSDSHNMSDDLVPQLQEVIGTDLLRDVENVLSCNKADHLLTWL  
PLRDRNLPASFFQQP

rs:XP\_025195803 [XP\_025195803] transcriptional coactivator YAP1  
[Melanaphis sacchari].>tr:A0A2H8TPG0\_9HEMI [A0A2H8TPG0] SubName:  
Full=Yorkie {ECO:0000313|EMBL:MBW16063.1}; 68..82  
MSGLQQQQQQEQHQVSIKMEPTGPNSPPPAANSNLVVRVDQNSSETDLQALFDTVLKPDGKKPLQLPY  
RMRQLPKSFFNPPSTGSKSPSISHSRENSGDSTFGIATASAQSQCTGGGPVPLHSRAHSSPASLQQTYAVSAAKQQ  
QQQQQHSKQRSYDVSSAIDELGPLPQGWEQARTPEGQIYYLNHLTRTTQWEDPRKSLAAQAAHQHRSAEQLLSP  
GNDSGSSTNATSTPTNSPPHIHSTLQGTNKNVTLGLPLDGWEQAVTGDGETYFINHIARTTSWFDPRIPVHLQRA  
PTSGAVLPSGSASWLLNGASGLSQSLQVTQQKLRRLHSLQLEREHLKSRQQEII RQQDLMLRTGQTNNDLDPFLSC  
SSNSVDHSRQESADSGLGGLGNNYSLPHTPEDFLSSNMDNMDCTSESDNPGPSSDMSVVDSQEMATLTDVTELDLVP  
SLQLGDDFGNDILDEVQLLIDPNNKPGSILTWL PYRMRQLPKSFFNPP

rs:XP\_024123677 [XP\_024123677] protein **FAM181A** [Oryzias  
melastigma].>rs:XP\_024123746 [XP\_024123746] protein **FAM181A** [Oryzias  
melastigma]. 103..117  
MANADSEVKTLNLFVNLISSDIKAALDKSAPCRRSVDHRKYLQKQLKRFSQKYSRAPRCHTHRSVDYKC  
AKPVGTVHQSATVTDKASSDAQEESVGSVAEQVPMRKRQLPASFWEEPKLNTSENALVRLKGS PAGMREGSAKEK  
QKTVHVDKVPAPASSRRSRTDKETLKLDLISPVSVSVCSPPFQYHGHHVHLHSHIVVPHPLGLWSKAASDLGR  
PDHPYEQKIHTHVVKPIPTKPAAQTPIFSVFGLI PMRKRQLPASFWEEP

rs:XP\_024122107 [XP\_024122107] transcriptional coactivator YAP1-like  
isoform X1 [Oryzias melastigma].>tr:A0A3B3DUB5\_ORYME [A0A3B3DUB5] SubName:  
Full=Uncharacterized protein {ECO:0000313|Ensembl:ENSOMEF00000033024};  
42..56  
MDAHRSGRQVVHVRGDSQKELEALFSRVMPSEASRQPSVPMRMRKLPDSFFKPPPRGHSRQASSDG  
GVCGLSLTPHHSRTVSAPAALPVNSLATQAADVAATSIIPDDVPLPHGWEMAKTPTGQRYFLNHLDKTTTWLDPRL  
SQLQSAQQHPISTAPVHSHSFSNPAPTTPAQSINPEPGPLPEGWEQAVTPEGEMYYIDHINKTTTWVDPRLAQKM  
SPGVLSLAMQRQEKLRCKQGAPPQVTQQEAAAGRNQMSAGMDHDRSGQVLVPSVDARIRAPNHETALNGAHSRNE  
TDSGLSVSSLPRTNDHMLSPVDHMDIGDSSDPPSMALQEPMLPMSEGEELMPCIP EGLSSDLLMDMETVLSGSHM  
DRDNLLTWL PMRMRKLPDSFFKPP

rs:XP\_024122108 [XP\_024122108] transcriptional coactivator YAP1-like  
isoform X2 [Oryzias melastigma]. 42..56  
MDAHRSGRQVVHVRGDSQKELEALFSRVMPSEASRQPSVPMRMRKLPDSFFKPPPRGHSRQASSDG  
GVCGLSLTPHHSRTVSAPAALPVNSLATQAADVAATSIIPDDVPLPHGWEMAKTPTGQRYFLNHLDKTTTWLDPRL  
SQLQSAQQHPISTAPVHSHSFSNPAPTTPAQSINPEPAQKMSPGVLSLAMQRQEKLRCKQGAPPQVTQQEAAAGRN  
QMSAGMDHDRSGQVLVPSVDARIRAPNHETALNGAHSRNESTDSGLSVSSLPRTNDHMLSPVDHMDIGDSSDPPS  
MALQEPMLPMSEGEELMPCIP EGLSSDLLMDMETVLSGSHMDRDNLLTWL PMRMRKLPDSFFKPP

rs:XP\_024132222 [XP\_024132222] protein **FAM181B** [Oryzias  
melastigma].>tr:A0A3B3B6C4\_ORYME [A0A3B3B6C4] SubName: Full=Family with  
sequence similarity 181 member B {ECO:0000313|Ensembl:ENSOMEF00000000712};  
155..169  
MAVQTAIMNPQFMSFCFPGSVMEFDMEKSLDGSLLCFAEQDEDFKETTDRDLSFIDSASSNIKALDKP  
VSKRKRNVNHRKYLQKQIKRGTGIIAPANGAETPVKRQSSPVTQQSSLQNKVLPKRQDGVQANLQSKSLAALFSPVK  
DIRGEKAKKPLRHRNLPPSFFTEPANCSKVPASEVTLKDLERGS PDDFFELLGPDYSGMVSDQELYQSVPLRMQ  
PELGGLDPASYDAHHLVAHHLIADPWTSCSGPSKKLGENLRAGPAQPPAYFQSEEASGGMDDNALCTLAFPNFFT  
DCSIPQVTYDLNSGYSSSYSSL PLRHRNLPPSFFTEP

rs:XP\_024133526 [XP\_024133526] transcriptional coactivator YAP1 isoform  
X1 [Oryzias melastigma].>tr:A0A3B3CY65\_ORYME [A0A3B3CY65] SubName:  
Full=Yes-associated protein 1 {ECO:0000313|Ensembl:ENSOMEF00000022104};  
45..59  
MDPSQHNPAGHQIVHVRGDSETDLEALFNAVMPKGA VVPQSVPMRMRKLPDSFFKPPPEPKSHSRQAS  
TDAGSGGVLTPHHVRAHSSPASLQLGAVSGGSLSGMASAGASPQHRLRQSSYEIPDDVPLPPGWEMAKTTSGQRYF  
LNHIDQTTTWQDPRKALLQLNQATPPSTVPVQQNLI SPASGPLPEGWEQAITPEGEIYYINHKNKTTSWLDPRL

ETRYALNQQRITQSAPVKQGGPLPPNPHGGVMGGNSQMRLQQLLEKERMRLKQQLLELRQRPQELALRNQLPTSMQD  
DGSSNPVSSPMAQDARTMTANSTDPFLNSGTYHSRDESTDSGLSMSSYSVPRTPDDFLNSVDEMDTGDPLAPSMG  
TQPSRFPDYLDITPGTDVLDLGTLESESMAVEGEELMPSLQEQALSSDILNDMETVLAATKIDKESFLTWL  
PMRMRKLPDSFFKPP

rs:XP\_024133527 [XP\_024133527] transcriptional coactivator YAP1 isoform  
X2 [*Oryzias melastigma*]. 45..59

MDPSQHNPAGHQIVHVRGDSETDLEALFNAVMPKAVVPQSVPMRMRKLPDSFFKPPPEPKSHSRQAS  
TDAGSGGVLTPHHVRAHSSPASLQLGAVSGGSLSGMASAGASPQHLRQSSYEIPDDVPLPPGWEMAKTTSGQRYF  
LNHIDQTTTWDPRKALLQLNQATPPSTVPVQQNLISPASALNQQRITQSAPVKQGGPLPPNPHGGVMGGNSQM  
RLQQLLEKERMRLKQQLLELRQRPQELALRNQLPTSMQDQSSNPVSSPMAQDARTMTANSTDPFLNSGTYHSRDES  
TDSGLSMSSYSVPRTPDDFLNSVDEMDTGDPLAPSMGTQPSRFPDYLDITPGTDVLDLGTLESESMAVEGEELMPS  
LQEQALSSDILNDMETVLAATKIDKESFLTWL PMRMRKLPDSFFKPP

rs:XP\_024285962 [XP\_024285962] protein **FAM181A** [*Oncorhynchus*  
*tshawytscha*]. 125..139

MASTDSEVKTLNLFVNASSDIKAALDKSAPCRRSVDHRKYLQKQLKRFSQKYARMPRCHTHRSTESSI  
AKDVVNTSSEYSLETTHTPSTTRVNEKGVSDARDVENARMAQTPTVDSDNSKQEQVPMRKRQLPASFWEEPRLAQT  
NTDYLYQYGWKKSQGVIGINDVEKIKKAHEELTPSLLSNRRGSVEKEPLKLDVASHNVNVCGFQYHGHVFEQ  
SHIVVPQSAVGLWGKATVAETETPDITHRHKNYTHVVVKPIPTKPTVPPSIFNVVFGFI PMRKRQLPASFWEEP

rs:XP\_024215400 [XP\_024215400] transcriptional coactivator YAP1-like  
isoform X1 [*Halyomorpha halys*]. 45..59

MSSKQPEVEQFKNLVVRIDQSDTDLQALFDSVLKPDSCRPLQVPPFRMRNLNPSFFNPPSTGSKSPSVS  
SISHSRENSADSAFGATNTTVSGLQVSHPRAHSSPASLQQTYASAGQQPTAGHHLKQRSYDMDELGPLPPGWEQA  
RTSEGQIYFLNHITQTTTWEPRKTVQAQQAQRAELLASSPHSTSPQPHATGKSSGTSNTTSGLGPLPDGWEQA  
ATAEGEYIFINHQAKTTSWFDPRIPVHLQRTSPAGNVLPAPLQPAVAQSQSLQATQQKLRQLQSLQMERERLKLRLQ  
QEIMRQQLMLRDPASSGLVDPFLSSLDHRSRQESADSGLGSGNSYSLPHTPDDFLNIDNMDGVSEGGTGDIPIS  
LDSHEITSLSDNIDSTDDLVPVTLQLGEEFTSDILDDVQSLINPTSKAGNLTWLPFRMRNLNPSFFNPP

rs:XP\_024215401 [XP\_024215401] transcriptional coactivator yorkie-like  
isoform X2 [*Halyomorpha halys*]. 45..59

MSSKQPEVEQFKNLVVRIDQSDTDLQALFDSVLKPDSCRPLQVPPFRMRNLNPSFFNPPSTGSKSPSVS  
SISHSRENSADSAFGATNTTVSGLQVSHPRAHSSPASLQQTYASAGQQPTAGHHLKQRSYDMDELGPLPPGWEQA  
RTSEGQIYFLNHITQTTTWEPRKTVQAQQAQRAELLASSPHSTSPQPHATAVHLQRTSPAGNVLPAPLQPAVA  
QSQSLQATQQKLRQLQSLQMERERLKLRLQEQEIMRQQLMLRDPASSGLVDPFLSSLDHRSRQESADSGLGSGNSYS  
LPHTPDDFLNIDNMDGVSEGGTGDIPSLDSHEITSLSDNIDSTDDLVPVTLQLGEEFTSDILDDVQSLINPTSKA  
GNLTWLPFRMRNLNPSFFNPP

rs:XP\_024615864 [XP\_024615864] protein **FAM181A** isoform X1 [*Neophocaena*  
*asiaeorientalis asiaeorientalis*].>tr:A0A341CMJ6\_9CETA [A0A341CMJ6] SubName:  
Full=protein **FAM181A** isoform X1 {ECO:0000313|RefSeq:XP\_024615864.1};  
193..207

MLLRGSPPCCPQPAISLPGRRLEECQTGVLPVLRNQCRLRALPWSRQPPAEPPSSWKAPCSGPLVMASDS  
DVKMLLNLFVNASSDIKAALDKSAPCRRSVDHRKYLQKQLKRFSQKYSRLPRGLPGRGAEPHLKRGSEDRPGRLP  
LDSGHSSSPGGGGCCKEKALGNPYREECLSKEQTLHGPDPEAARPGQVPMRKRQLPASFWEEPRTQSYVGLGEG  
GLGPREGPPYEGKKHCKGLEPLGPETAPVPASPRAPAEKEPLKMPGVSLVGRVNAWSCCPFYHGQPIYPGPPGA  
LPQSPLPSLGLWRKSSAAPGELAHFCKDVEGPGQKVYRPVVLKPIPTKAMPPIIFNVVFGYL  
PMRKRQLPASFWEEP

rs:XP\_024615872 [XP\_024615872] protein **FAM181A** isoform X2 [*Neophocaena*  
*asiaeorientalis asiaeorientalis*].>tr:A0A341CPW3\_9CETA [A0A341CPW3] SubName:  
Full=protein **FAM181A** isoform X2 {ECO:0000313|RefSeq:XP\_024615872.1};  
129..143

MASDSVDMMLNLFVNASSDIKAALDKSAPCRRSVDHRKYLQKQLKRFSQKYSRLPRGLPGRGAEPHLK  
RGSEDRPGRLPLDSGHSSSPGGGGCCKEKALGNPYREECLSKEQTLHGPDPEAARPGQVPMRKRQLPASFWEEPRT  
QSYVGLGEGGLGPREGPPYEGKKHCKGLEPLGPETAPVPASPRAPAEKEPLKMPGVSLVGRVNAWSCCPFYHG  
QPIYPGPPGALPQSPLPSLGLWRKSSAAPGELAHFCKDVEGPGQKVYRPVVLKPIPTKAMPPIIFNVVFGYL  
PMRKRQLPASFWEEP

rs:XP\_011715448 [XP\_011715448] protein **FAM181A** [Macaca nemestrina].>rs:XP\_011715449 [XP\_011715449] protein **FAM181A** [Macaca nemestrina].>rs:XP\_011715450 [XP\_011715450] protein **FAM181A** [Macaca nemestrina]. 129..143  
MASDSDVKMLLNFNVLASSDIKAALDKSAPCRRSVDHRKYLQKQLKRFSQKYSRLPRGLPGRAAEPYLK  
RGSEDRPGRLLLLDLGPDSSPGGGGGCKEKVLRNPNYREECLAKEQLPQGQHPEAAQPGQVPMRKRQLPASFWEEP  
PTHSYHVGLEGLGPREGPPYEGKKNCKGLEPLGPEIVPVPMSPRALAEKEPLKMPGVSLVGRVNAWSCPPFYH  
GQPIYPGPLGALPQSPVPSLGLWKKSPAFFGELAHLCCKDADGLGQKVCRPVVLKPIPTKPAVPPPIFNVFGYL  
PMRKRQLPASFWEEP

rs:XP\_017271841 [XP\_017271841] LOW QUALITY PROTEIN: protein **FAM181B** [Kryptolebias marmoratus]. 244..258  
MQVVGHKQRVKSXPLLLLLFDVLTSSVLPXKISFLSSNPSPSLPWNVYGKLHKSHRVFICRTKPCSEG  
TSASGITVDATGVASGLNRVMAVQTAIMNPQFMSFCFPDAVMEYDMEKSLDGGLLCEAENDEDFKETTRDLSFI  
DSASSNIKLALDKPVKSKRKNVHRKYLQKQIKRGTGIIAPANAAEAPVKRQGSVPTQPSPLQSKTLPKRDGVQAN  
LQSKSLAALFNPGKDIRGEKAKKPLRHRNLPPSFFTEPAHCSKVSSTSGMTLKDLEGRNPEAADFFELLGPDYS  
NMVSDQDLYQGMPLRVQPDLDGGMDPTSYDSHHLVGGLLYSEPWTS CSGSPSKLGE SLHAGPAQPPVYCQSEDASG  
PVDDSGLCTLAFSNFFTDCSIQVVTYDLNCGYNKANYSSL PLRHRNLPPSFFTEP

rs:XP\_017271941 [XP\_017271941] transcriptional coactivator YAP1 [Kryptolebias marmoratus]. 45..59  
MDPSQHNPAGHQI IHVRGDSETDLETLFNIVMNPNSPNI PHCVPMRMRKLPDSFFNPPEPKSHSRQAS  
TDAGSGAVLTPHHVRAHSSPASLQLGAVSGGSLSGMASAGASPOHLRQSSYEIPDDVPLPAGWEMAKTSSGQRYF  
LNHIDKTTTWQDPRKPLLQMNQAPPPSSVPVQQQNLMPATGPLPDGWQAITPDGEIYYINHNKTTSWLDPRL  
EPRYALNQQRITQSAPVKQGGQLPPSTHSGVLGGNNQMRLOQIEKERLRLKQHEALRQRPOELALRNQLPTSMEQ  
DGGSNPVSSPLAQDARTMTANSSDPFLNSGTYHSRDESTDSGLSMSSYSVPRTPDDFLNSVDEMDTGDQLPPSMA  
TQPSRFPDYLD AIPGTDVLDLGTLEGESMAVEGEELMPSLQEP LSSDILSDMESVLAATKIDKESFLTWL  
PMRMRKLPDSFFNPP

rs:XP\_017273649 [XP\_017273649] transcriptional coactivator YAP1-like isoform X1 [Kryptolebias marmoratus].>rs:XP\_017273650 [XP\_017273650] transcriptional coactivator YAP1-like isoform X1 [Kryptolebias marmoratus].>rs:XP\_024862090 [XP\_024862090] transcriptional coactivator YAP1-like isoform X1 [Kryptolebias marmoratus].50..64  
MDAHRGGGGGAPPAGQQVVHVRGDSKTELEALFSAVMNPNGKAARQPQSLPMRMRKLPDSFFKPPDPRGH  
SRQASSDGGVCGALAPHHVRAHSSPASLPVNSLTAQADADAAAAPILPDDMPLPDGWEMAKTPTGQRYFINHLQK  
TTTWQDPRLSQLQSAAAQHQISCAPVHAHSFNSPAPTTQPQTISPEPGPLPEGWEQAVTADGEVYYIDHINKTTT  
WVDPRLAQKMNPGILGLQQRQEKERLRLKQGI PPQIAPQEAAGRSQMPGGMDHRSVQMLVPSVDIRIRALNQEP  
TLNGAHSRNESTDSGLSVSSLPRTSDHMLSSVDHMDTGDSSPEP SVTMQESMPVLP ISEGEELMPSIPDGLNSDL  
LMDMETVLSGPHMDRDSLTLTWL PMRMRKLPDSFFKPP

rs:XP\_017273652 [XP\_017273652] transcriptional coactivator YAP1-like isoform X2 [Kryptolebias marmoratus]. 50..64  
MDAHRGGGGGAPPAGQQVVHVRGDSKTELEALFSAVMNPNGKAARQPQSLPMRMRKLPDSFFKPPDPRGH  
SRQASSDGGVCGALAPHHVRAHSSPASLPVNSLTAQADADAAAAPILPDDMPLPDGWEMAKTPTGQRYFINHLQK  
TTTWQDPRLSQLQSAAAQHQISCAPVHAHSFNSPAPTTQPQTISPEPAQKMNPGILGLQQRQEKERLRLKQGI PP  
QIAPQEAAGRSQMPGGMDHRSVQMLVPSVDIRIRALNQEP TLNGAHSRNESTDSGLSVSSLPRTSDHMLSSVDH  
MDTGDSSPEP SVTMQESMPVLP ISEGEELMPSIPDGLNSDLLMDMETVLSGPHMDRDSLTLTWL  
PMRMRKLPDSFFKPP

rs:XP\_011648280 [XP\_011648280] transcriptional coactivator YAP1 [Pogonomyrmex barbatus]. 47..61  
MAINPEVVDQLTKSNPVVRVDQNSESDLQALFDTVLKPD SKRPLQVPLRMRNL PDSFFNPPSTGSKSPS  
ISHSRENSADSAFGVAVTATPNGGGAGGGASNGGASGSGSGGGGGGGGNAAGAAGTGGAAAGLTVSHPRAHSS  
PASLQQTYASAQQAPQHAPQPHARHHHHQKQRSYDVI STVDDLGLPLPHGWQARTPEGQIYFLNHITRTTWEDEP  
RKTAASVA AVAAAVESNKPNSLGLPLPDGWQARTAEGEVYFINHQSR TTSWFDPRIPAHLQRTPASGAMLPQ  
NWLQQPTGGLQNNQNAVCCQKLR LYSLHQRERLKRQAEIMRQQEMMRLSITDAAIDPFVSGINEQHARQESTD  
SGVGLVSAYS LPHASEDYVIDENMDGTS DGGAPMETPDLSTLSDNIDSPDDLPSLQLNEEFSTDILDDVQSLIN  
PNTTKPENVTWL PLRMRNL PDSFFNPP

rs:XP\_025213170 [XP\_025213170] protein **FAM181B** [Theropithecus gelada].  
221..235

MAVQAALLSTHPFVVFVFGGSPDGLGGAFGALDKGCCFEDDETGAPAGALLSGAEGGDVREATRDLLSF  
IDSASSNIKLALDKPGKSKRVNHRKYLQKQIKRCSGLMGAVPPGPPSPSAADTPAKRPLAAPSAPTVAAPAHGK  
AVPRREASQAAAAASLQSRSLAALFDSLHRVPGGAEPAGGAVAAPVAGLGGAGTGGAGGDAAGPAGATAVPGARK  
VPLRARNLPPSFFTEPSRAGGGGCGSPGPDVSLGDLEKGAEAVEFFELLGPDYAGTEAAVLLAAEPLDVFPAGA  
SVLRGPPELESGLFDPAPAVVGNLLYPEPWSVPGCPPTKKPPLTAPRGGLTLNEPLRPLYPAAADSPPGGEDGPGH  
LASFSPPFFPCALPPPPPPPHQVSYDYSAGYSRNAYSSSLWRPDAVWEGAPGEEGAHRD PLRARNLPPSFFTEP

rs:XP\_025248178 [XP\_025248178] protein **FAM181A** isoform X1 [Theropithecus gelada].  
179..193

MMQPTESTEGPGRKRQGTAKQVSLVAFLGAAGHQQSPSSWKASCSGPLVMASDSDVKMLLNFNVLASS  
DIKAALDKSAPCRRSVDHRKYLQKQLKRFSQKYSRLPRGLPGRAAEPYLKRGSSEDRPGRLLLLDLGPDSSPGGGGG  
CKEKALRNPHYREECLAKEQLPQGQHPEAAQPGQVPMRKRQLPASFWEEP RPPTHSHYHVGLEGGGLGPREGPPYEGKK  
NCKGLEPLGPEIVPVPMSPRALAEKEPLKMPGVSLVGRVNAWSCCPFYHQQPIYPGPLGALPQSPVPSLGLWKK  
SPAFPGELAHLCKDADGLGQKVCRPVVLKPIPTKPAVPPPIFNVFGYL PMRKRQLPASFWEEP

rs:XP\_025248184 [XP\_025248184] protein **FAM181A** isoform X3 [Theropithecus gelada].  
165..179

MACFVQVSLVAFLGAAGHQQSPSSWKASCSGPLVMASDSDVKMLLNFNVLASSDIKAALDKSAPCRR  
SVDHRKYLQKQLKRFSQKYSRLPRGLPGRAAEPYLKRGSSEDRPGRLLLLDLGPDSSPGGGGGCKEKALRNPHYREEC  
LAKEQLPQGQHPEAAQPGQVPMRKRQLPASFWEEP RPPTHSHYHVGLEGGGLGPREGPPYEGKKNCKGLEPLGPEIVP  
VPMSPRALAEKEPLKMPGVSLVGRVNAWSCCPFYHQQPIYPGPLGALPQSPVPSLGLWKKSPAFPGELAHLCKD  
ADGLGQKVCRPVVLKPIPTKPAVPPPIFNVFGYL PMRKRQLPASFWEEP

rs:XP\_015595189 [XP\_015595189] transcriptional coactivator YAP1 [Cephus cinctus].  
47..61

MALNQDGVQLSKSNLVVRIDQNSESDLQALFDSVLKPDSTRPLQVPLMRNLPSFFNPPSTGSKSPS  
ISHSRENSADSAFGTAAVAVVAVGSAAGTAAPGGSAGATGTAGGASGAAAVAGAAGAAGLTVAH PRAHSSPASLQQ  
TYASAQQAPQHAPQPHARHHHHQKQRSYDVI STVDDLGLPLPHGWEQARTPEGQIYFLNHLTRTTTWEDPRKTAAA  
ANVAAVAAAVESGKTSTGATSSLGPLPDGWEQARTQEGEIYFINHQTRTTSWFDPRIPSHLQRAPTSGAML PQNW  
LQQPGGGGIQSNQTLQACQQKLRQLQSLQMERERLQKQRQEI IRQQELMLRQSNTDAAMPFLPGINEQHARQESA  
DSGLGLGSAYS LPHTPEDFLANIDDNMDGTSEGGAPMETPDLSTLSDNIDSTDDLVP SLQLGEEFSSDILDDVQS  
LINPNPSKPEENVLTWL PLRMRNLPSFFNPP

rs:XP\_008306240 [XP\_008306240] protein **FAM181A** [Cynoglossus semilaevis].  
104..118

MANADSEVKTLNLFVNLAASSDIKAALDKSAPCRRSVDHRKYLQKQLKRFSQRYSRVPRCHTHRPAEYGC  
SRLAGAAHQSEKLAATASSGAQDAGNVGSAVEQVPMRKRQLPASFWEEP KLTSPSKSGRSHLLGLKRVVPGAFEGS  
ENEKRKRKGCGEDAKVMSAASRRNSADKETLKLDLTSHHCVSVCACCPFLNHGHQVLHSHIVVPHPLGLWSKAA  
GTEAERPEHPFTQKVHTHVVVKPIPTKPTLQSPIFSVFGFI PMRKRQLPASFWEEP

rs:XP\_025028171 [XP\_025028171] protein **FAM181A** [Python bivittatus].  
135..149

MASADSEVKTLNLFVNLAASSDIKAALDKSAPCRRSVDHRKYLQKQLKRFSQKYSRLPRCHHHHLQPQLPP  
ARERRAPEGRARGLSVADGPESVGRGHAAPGTAKGDKASRAPERLGDEEQQETPEAGARPDQVPMRKRQLPAS  
FWEEP RPAPGSPGVVSGVIFPVGVSSSPSSSSSPSSSKDLPPYEGKKNKTGLDSGGTGTVLESPPRRPEAEAAK  
GLRAWSCCPFQCHGLQASPGVYPPRRKDAPSPTGEAFCQAGQKVYRPVVWKP IPTKPAAPPLIFSVFGYL  
PMRKRQLPASFWEEP

rs:XP\_025155622 [XP\_025155622] transcriptional coactivator YAP1  
[Harpegnathos saltator]. 46..60

MALNQDVDQLTKSNLVVRIDQNSESDLQALFDSVLKPDSTRPLQVPLMRKLPSFFNPPSTGSKSPSI  
SHSRENSADSAFGTAAATPSNAAGGGAGSNASNGGANGSGAGAGGGGAGGGNAAAADAAGAGAGGGGAGGGAAGG  
GGAAGGGAGGANSAAAGAAAAAAAAAAAAAAAAAGLTVAH PRAHSSPASLQQTYASAQQAPQHAPQPHARHHHHQKQRS  
YDVI STVDDLGLPLPHGWEQARTPEGQIYFLNHLTRTTTWEDPRKTAAAANVAAVAAAVESGKSNNGNTLGLPLPDGW  
EQARTPEGEIYFINHQTRTTSWFDPRIPSHLQRAPTSGAML PQSWLQQPTGGGIQSSQSLQACQQKLRQLQSLQME  
RERLQKQRQEI MRQELMLRQSTTDAAMPFLSGINEQHARQESADSGGLGLGSAYS LPHTPEDFLANIDDNMDGT

SDGGAPMETPDLSTLSDNIDSTDDLLPSLQLTEDFSSDILDDVQSLINPNTTKPENVLTWL  
PLMRKLPDSFFNPP

rs:XP\_025264222 [XP\_025264222] transcriptional coactivator YAP1 isoform  
X1 [Camponotus floridanus].>rs:XP\_025264223 [XP\_025264223] transcriptional  
coactivator YAP1 isoform X1 [Camponotus floridanus]. 46..60

MALNQDQDQLSKSNLVVRVDQNSESDLQALFDTVLPKPSKRPLQVPLMRNLPDSFFNPPSTGSKSPSI  
SHSRENSADSAFGTAATPSGGSGGGGGGGGGGGGGGAPNVANGSGNGTGSTAGAGGAAGGGGGAGGGGGANSAA  
GAVAAAAAVAAAAAAGLTVAHAPRAHSSPASLQOQTYASAQQAPQHAPQPHARHHHHKQORSYDVISSQVDDLGPL  
PHGWEQARTAEQIYFLKGNLQLFITIPSNPSNERHNLLLLSHLTRTTTWEDPRKTAATAANVAAVAAAVENSKSN  
PNSLGPLPDGWEQARTTEGEIYFINHQTRTTSWFDPRIQDIIVALATHLQRTPASGAMLPQNSWLQAPAGVIQSNQ  
NLQVCQQKLRQLQSLQMERERLQQRQOEIMRSQQELMLRQSTTTDAAMPFLSGINEHARQESADSGLGLGSAYS  
SLPHTPEDFLANIDNMDGTSERHCALIDLTKRLYRSHKYLNGGAPMETPDLSTLSDNIDSTDDLLPSLHMS  
EDFSSDILDDVQSLINPNTTKADNVLTWL PLMRNLPDSFFNPP

rs:XP\_025264224 [XP\_025264224] transcriptional coactivator YAP1 isoform  
X2 [Camponotus floridanus]. 46..60

MALNQDQDQLSKSNLVVRVDQNSESDLQALFDTVLPKPSKRPLQVPLMRNLPDSFFNPPSTGSKSPSI  
SHSRENSADSAFGTAATPSGGSGGGGGGGGGGGGGGAPNVANGSGNGTGSTAGAGGAAGGGGGAGGGGGANSAA  
GAVAAAAAVAAAAAAGLTVAHAPRAHSSPASLQOQTYASAQQAPQHAPQPHARHHHHKQORSYDVISSQVDDLGPL  
PHGWEQARTAEQIYFLKGNLQLFITIPSNPSNERHNLLLLSHLTRTTTWEDPRKTAATAANVAAVAAAVENSKSN  
PNSLGPLPDGWEQARTTEGEIYFINHQTRTTSWFDPRIPTHLQRTPASGAMLPQNSWLQAPAGVIQSNQNLQVCQQ  
KLRQLQSLQMERERLQQRQOEIMRSQQELMLRQSTTTDAAMPFLSGINEHARQESADSGLGLGSAYS  
SLPHTPEDFLANIDNMDGTSERHCALIDLTKRLYRSHKYLNGGAPMETPDLSTLSDNIDSTDDLLPSLHMS  
EDFSSDILDDVQSLINPNTTKADNVLTWL PLMRNLPDSFFNPP

rs:XP\_025264225 [XP\_025264225] transcriptional coactivator YAP1 isoform  
X3 [Camponotus floridanus]. 46..60

MALNQDQDQLSKSNLVVRVDQNSESDLQALFDTVLPKPSKRPLQVPLMRNLPDSFFNPPSTGSKSPSI  
SHSRENSADSAFGTAATPSGGSGGGGGGGGGGGGGGAPNVANGSGNGTGSTAGAGGAAGGGGGAGGGGGANSAA  
GAVAAAAAVAAAAAAGLTVAHAPRAHSSPASLQOQTYASAQQAPQHAPQPHARHHHHKQORSYDVISSQVDDLGPL  
PHGWEQARTAEQIYFLKGNLQLFITIPSNPSNERHNLLLLSHLTRTTTWEDPRKTAATAANVAAVAAAVENSKSN  
PNSLGPLPDGWEQARTTEGEIYFINHQTRTTSWFDPRIQDIIVALATHLQRTPASGAMLPQNSWLQAPAGVIQSNQ  
NLQVCQQKLRQLQSLQMERERLQQRQOEIMRSQQELMLRQSTTTDAAMPFLSGINEHARQESADSGLGLGSAYS  
SLPHTPEDFLANIDNMDGTSDGGAPMETPDLSTLSDNIDSTDDLLPSLHMS  
EDFSSDILDDVQSLINPNTTKADNVLTWL PLMRNLPDSFFNPP

rs:XP\_025264226 [XP\_025264226] transcriptional coactivator YAP1 isoform  
X4 [Camponotus floridanus]. 46..60

MALNQDQDQLSKSNLVVRVDQNSESDLQALFDTVLPKPSKRPLQVPLMRNLPDSFFNPPSTGSKSPSI  
SHSRENSADSAFGTAATPSGGSGGGGGGGGGGGGGGAPNVANGSGNGTGSTAGAGGAAGGGGGAGGGGGANSAA  
GAVAAAAAVAAAAAAGLTVAHAPRAHSSPASLQOQTYASAQQAPQHAPQPHARHHHHKQORSYDVISSQVDDLGPL  
PHGWEQARTAEQIYFLNHLTRTTTWEDPRKTAATAANVAAVAAAVENSKSNPNSLGPLPDGWEQARTTEGEIYFI  
NHQTRTTSWFDPRIQDIIVALATHLQRTPASGAMLPQNSWLQAPAGVIQSNQNLQVCQQKLRQLQSLQMERERLQQR  
QOEIMRSQQELMLRQSTTTDAAMPFLSGINEHARQESADSGLGLGSAYS  
SLPHTPEDFLANIDNMDGTSERHCALIDLTKRLYRSHKYLNGGAPMETPDLSTLSDNIDSTDDLLPSLHMS  
EDFSSDILDDVQSLINPNTTKADNVLTWL PLMRNLPDSFFNPP

rs:XP\_025264227 [XP\_025264227] transcriptional coactivator YAP1 isoform  
X5 [Camponotus floridanus]. 46..60

MALNQDQDQLSKSNLVVRVDQNSESDLQALFDTVLPKPSKRPLQVPLMRNLPDSFFNPPSTGSKSPSI  
SHSRENSADSAFGTAATPSGGSGGGGGGGGGGGGGGAPNVANGSGNGTGSTAGAGGAAGGGGGAGGGGGANSAA  
GAVAAAAAVAAAAAAGLTVAHAPRAHSSPASLQOQTYASAQQAPQHAPQPHARHHHHKQORSYDVISSQVDDLGPL  
PHGWEQARTAEQIYFLNHLTRTTTWEDPRKTAATAANVAAVAAAVENSKSNPNSLGPLPDGWEQARTTEGEIYFI  
NHQTRTTSWFDPRIPTHLQRTPASGAMLPQNSWLQAPAGVIQSNQNLQVCQQKLRQLQSLQMERERLQQRQOEIMRS  
QQELMLRQSTTTDAAMPFLSGINEHARQESADSGLGLGSAYS  
SLPHTPEDFLANIDNMDGTSERHCALIDLTKRLYRSHKYLNGGAPMETPDLSTLSDNIDSTDDLLPSLHMS  
EDFSSDILDDVQSLINPNTTKADNVLTWL PLMRNLPDSFFNPP

rs:XP\_025264228 [XP\_025264228] transcriptional coactivator YAP1 isoform X6 [Camponotus floridanus]. 46..60

MALNQDQVDQLSKSNLVVRVDQNSESDLQALFDTVLKPDSCRPLQVPLRMRNLPDSFFNPPSTGSKSPSISHSRENSADSAFGTAATPSGGSGGGGGGGGGGGGGGAPNVSANGSGNGTGSTAGAGGAAGGGGGAGGGGGANSAA GAVAAAAAVAAAAAAGLTVAHPRAHSSPASLQQTYASAQQAPQHAPQPHARHHHHQKQRSYDVISSQVDDLGPL PHGWEQARTAEQIYFLNHLTRTTTWEDPRKTAANVAVAVAVAENSKSNPNLSLGPLPDGWEQARTTEGEIYFI NHQTRTTSWFDPRIPTHLQRTPASGAMPLPQNSWLQVAGVIOQSNQNLQVCQKLRQLQSLQMERERLKRQQEIMRS QQELMLRQSTTDAAMPFLSGINEHARQESADSGLGLGSAYSPLHTPEDFLANIDDNMDGTSDDGAPMETPDLST LSDNIDSTDDLLPSLHMSDEFSSDILDDVQSLINPNTTKADNVLTLWPLRMRNLPDSFFNPP

rs:XP\_012266693 [XP\_012266693] transcriptional coactivator YAP1 isoform X1 [Athalia rosae]. 45..59

MALNQDQVDQLKSSLVVRIDQNSESDLQALFDSVLKPDAGRPLQVPLRMRNLPDSFFNPPSTGSKSPSIS HSRENSADSAFGATGGGSGASSGCVSSGTTGTGAGAGGGTSCCTNSAGTPGSGAGVGGTAGSTVAANGLTVSHP RAHSSPASLQQTYASAQQAQHTPQPHPRHHHHKQRSYDVISTVDDLGLPLPPGWEQARTPEGQVYFLNHMTRTTT WEDPRKTAANVAVAVAVAESGTKNSSAATSSLGLPLPDGWEQARTPEGEIYFINHQTRTTSWFDPRIPTHLQRA PTSGAMPLPQTLWQPGAGGIQSSQTIQACQRLHSLQLERERLKRQQEIMRQELMRQTTTEVAMPDFFLSGINEQ HARQESADSGLGLGSAYSPLHTPEDFLANIDDNMDGRSEGAPMETPDLSTLSDNIDSTDDLVPSSLQLGEEFTSDI LDDVQSLINPNTSKSENVLTWL PLRMRNLPDSFFNPP

rs:XP\_020711642 [XP\_020711642] transcriptional coactivator YAP1 isoform X2 [Athalia rosae]. 45..59

MALNQDQVDQLKSSLVVRIDQNSESDLQALFDSVLKPDAGRPLQVPLRMRNLPDSFFNPPSTGSKSPSIS HSRENSADSAFGATGGGSGASSGCVSSGTTGTGAGAGGGTSCCTNSAGTPGSGAGVGGTAGSTVAANGLTVSHP RAHSSPASLQQTYASAQQAQHTPQPHPRHHHHKQRSYDVISTVDDLGLPLPPGWEQARTPEGQVYFLNHMTRTTT WEDPRKTAANVAVAVAVAESGTKNSSAATSSLGLPLPDGWEQARTPEGEIYFINHQTRTTSWFDPRIPTHLQRA PTSGAMPLPQTLWQPGAGGIQSSQTIQACQRLHSLQLERERLKRQQEIMRQELMRQTTTEVAMPDFFLSGINEQH ARQESADSGLGLGSAYSPLHTPEDFLANIDDNMDGRSEGAPMETPDLSTLSDNIDSTDDLVPSSLQLGEEFTSDIL DDVQSLINPNTSKSENVLTWL PLRMRNLPDSFFNPP

rs:XP\_025775740 [XP\_025775740] protein **FAM181A** [Puma concolor].129..143

MANDSDVKMLLNFNVLASSDIKAALDKSAPCRRSVDHRKYLQKQLKRFSQKYSRLPRGLPGRGAEPHLK RGPEDRPGRLPLDSGHSSPVGGGCKEKALGNPYREECLSKEQTLQGNPEAARPGQVPMRKRQLPASFWEEP ATHSYPLGLEGGPGPREGPPYEGKKHCKGLEPLDPETAPVPASPAPAEKEPLKMSGVSLVGRVNAWSCCFFQYH GQPVYPPGPGALPQSPVPLSLWRKSPASPGELAHFCKDVGPGQKVYRPVVLKPIPTKPAVPPPIFNVFGYL PMRKRQLPASFWEEP

rs:XP\_025902748 [XP\_025902748] protein **FAM181A** [Nothoprocta perdicaria]. 125..139

MASDSEVKTLNFNVLASSDIKAALDKSAPCRRSVDHRKYLQKQLKRFSQKYSRIPRCHPSKPVCECSGK KGTEERGRGAQPEAADSSPQCRAERALRAAEAEETFPGEQLLQEQNPEPARPDQVPMRKRQLPASFWEEPRAQSL LGRSFPAGLDGLPNSGEPLPYEGKKSRRSPEAAGPESAHEPVLHGGEKDRAKAAGPPAAARVPAWTCCPFQACG QPLYQSPAALPPSLFPLALWRKSAALPGEVQHFCKEADNAGQKLYRPVVVKPIPTKPPVPPPIFNVFGYI PMRKRQLPASFWEEP

rs:XP\_025890735 [XP\_025890735] transcriptional coactivator YAP1 isoform X1 [Nothoprocta perdicaria]. 87..101

MDPGQPQPQPPPPAAQPAAPQPPPPQPPPPGAVSGAAAGAAQPPGAGPPPAGHQIVHVRGDSETDLEA LFNAMNPKGANVPHTLPMRLRKLPLDSFFKPEPKAHSRQASTDAGTAGALTPQHVRHSSPASLQLGAVSPGTL SPSGVVTGPGAPSSQHLRQSSFEIPDDVPLPPGWEMAKTPSGQRYFLNHIDQTTTWQDPRKAMLSQMNVTAPTSP PVQQNIMNSASGPLPDGWEQAMTQDGEIYYINHNKNTTSWLDPRLDPRFAMNQRISSAPVKQPPPLAQSPQGG VMSGSSSNQQQMRLOQLQMEKERLRLKHQELLRQVRPQALRNINPSTANSPKHQELALRSQLPTMEQDGGSONP VSSPGMSQELRTMTTSSDPFLNSGTYHSRDESTDSGLSMSSYSVPRTPDDFLNSVDEMDTGDSISQSNIPSHQN RFPDYLEAIPGTNVDLGTLEGDMNIEGELMPSLQEQALSSDILNDMESVLAATKLDKESFLTWL PMRLRKLPLDSFFKPP

rs:XP\_025890736 [XP\_025890736] transcriptional coactivator YAP1 isoform X2 [Nothoprocta perdicaria]. 87..101

MDPGQPQPQPPPPAAQPAAPQPPPPQPPPPGAVSGAAAGAAQPPGAGPPPAGHQIVHVRGDSETDLEA

LFNAVMNPKGANVPHTLPMRLRKL PDSFFK PPEPKAHSRQASTDAGTAGALTPQH VRAHSSPASLQLGAVSPGTL  
SPSGVVTGPGAPSSQH LRQSSFEI PDDVPLPPGWEMAKTPSGQRYFLNHIDQTTTWQDPRKAMLSQMNV TAPTSP  
PVQQNIMNSASAMNQRISQSAPVKQPPPLAPQSPQGGVMSGSSSNQQQQMRLQQLQMEKERLRLKHQELLRQELAL  
LRSQLPTMEQDGGSQNPVSSPGMSQELRTMTTNSSDPFLNSGTYHSRDESTDSGLSMSSYSVPRTPDDFLNSVDE  
MDTGDSISQSNIPSHQNRFPDYLEAIPGTNVDLGTLLEGDMNIEGEEELMPSLQEQALSSDILNDMESVLAATKLDK  
ESFLTWL PMRLRKL PDSFFKPP

rs:XP\_025890737 [XP\_025890737] transcriptional coactivator YAP1 isoform X3 [Nothoprocta perdicaria]. 13..27

MNPKGANVPHTLPMRLRKL PDSFFK PPEPKAHSRQASTDAGTAGALTPQH VRAHSSPASLQLGAVSPGTL  
LSPSGVVTGPGAPSSQH LRQSSFEI PDDVPLPPGWEMAKTPSGQRYFLNHIDQTTTWQDPRKAMLSQMNV TAPTSP  
PPVQQNIMNSASGPLPDGWEQAMTQDGEIYYINHKNKTTSWLDPRLDPRFAMNQRISQSAPVKQPPPLAPQSPQG  
GVMSGSSSNQQQQMRLQQLQMEKERLRLKHQELLRQELALRSQLPTMEQDGGSQNPVSSPGMSQELRTMTTNSSD  
PFLNSGTYHSRDESTDSGLSMSSYSVPRTPDDFLNSVDEMDTGDSISQSNIPSHQNRFPDYLEAIPGTNVDLGTL  
EGDMNIEGEEELMPSLQEQALSSDILNDMESVLAATKLDKESFLTWL PMRLRKL PDSFFKPP

rs:XP\_025935500 [XP\_025935500] protein FAM181A [Apteryx rowi]. 127..141

MASDSEVKTL LN FVNLASSDIKAALDKSAPCRRSVDHRKYLQKQLKRFSQKYSRI PRCHPSKSAECSVK  
RGTEDRSRGSQSEVV DSSHHCRAAA EKVLRTAEVEENFSGEQVLQEQNPEPARPDQVPMRKRQLPASFWEEP  
QSL LARSFPAGLDGLPNSRDVPVYEGKKSRRSPEAAGPESPPEPVQHGSEDPKAPGPPMSGRVAAWTCCPFQCP  
GQPLYQTPGALPPSXFPGGLGWRKSAALPGEIQHFSKEADSTGQKLYRPMVLKPIPTKPAVPPPIFNVFGYI  
PMRKRQLPASFWEEP

rs:XP\_025968286 [XP\_025968286] protein FAM181A [Dromaius novaehollandiae]. 127..141

MASDSEVKTL LN FVNLASSDIKAALDKSAPCRRSVDHRKYLQKQLKRFSQKYSRI PRCHPSKSAECSMK  
RGAEERSHVPQPEAPDSSHHCRAAA EKALGTAEVEETFSGEQVLQEQNPEPARPDQVPMRKRQLPASFWEEP  
QSL LARSFPAGLDGLPNSGDPLPYEGKKSRRSPEAASPEPPEPVQRGGEKDPKAPGPPVSGRVAAWTCCPFQC  
PGQPLYQTPGTLPPSPFPGGLGWRKSTALPGEVQHFCKEADSTXQKLYRPVVLKPIPTKPAVPPPIFNVFGYI  
PMRKRQLPASFWEEP

rs:XP\_011165255 [XP\_011165255] transcriptional coactivator YAP1-A isoform X1 [Solenopsis invicta].>rs:XP\_025986169 [XP\_025986169] transcriptional coactivator YAP1-A isoform X1 [Solenopsis invicta].>rs:XP\_025986170 [XP\_025986170] transcriptional coactivator YAP1-A isoform X1 [Solenopsis invicta]. 47..61

MALNQDVVDQLSKSNPVVRVDQNSESDLQALFDTVLKPD SKRPLQVPLRMRNL PDSFFNPPSTGSKSPS  
ISHSRENSADSAFGVAVTGGTPNGGGGAGGSGGTPSGGASGSGGGGGGGGGGGGGGGGNAAGVTGTGSGNAG  
AGGGANGTANAIAAAA AVAAAAGLTVSH PRAHSSPASLQQTYASAQQAPQHAPQPHARHHHHQKQRSYDVIAPTV  
DDLGLPLPTGWEQARTQEGQIYFLNHVTRTTTTWEDPRKTA AAAANVA AVAAAVESNKNNALGPLPDGWEQARTQEGE  
VYFINHQTRTTSWFDPRIHI IYSASHLQRTPAAGVMLPQNWLQOQTGIQSNQSLQACQKIRLQSLQMECERLK  
QRRQEIIRQVSMQEMMLQQSRTDAAMD PFLPSGISEHARTESADSGLGLGSAYPLPQTSDDFLNIDENMDGT SER  
HCSLNDLTKRLYRSHKYINGAPMETPDL SLSDNIDATD DLLPSLQLN EEFSTDILDDVQSLINPNTTKPENVLTW  
L PLRMRNL PDSFFNPP

rs:XP\_011165256 [XP\_011165256] transcriptional coactivator YAP1-A isoform X2 [Solenopsis invicta]. 47..61

MALNQDVVDQLSKSNPVVRVDQNSESDLQALFDTVLKPD SKRPLQVPLRMRNL PDSFFNPPSTGSKSPS  
ISHSRENSADSAFGVAVTGGTPNGGGGAGGSGGTPSGGASGSGGGGGGGGGGGGGGGGNAAGVTGTGSGNAG  
AGGGANGTANAIAAAA AVAAAAGLTVSH PRAHSSPASLQQTYASAQQAPQHAPQPHARHHHHQKQRSYDVIAPTV  
DDLGLPLPTGWEQARTQEGQIYFLNHVTRTTTTWEDPRKTA AAAANVA AVAAAVESNKNNALGPLPDGWEQARTQEGE  
VYFINHQTRTTSWFDPRIHI IYSASHLQRTPAAGVMLPQNWLQOQTGIQSNQSLQACQKIRLQSLQMECERLK  
QRRQEIIRQVSMQEMMLQQSRTDAAMD PFLPSGISEHARTESADSGLGLGSAYPLPQTSDDFLNIDENMDGT SERHCS  
LNDLTKRLYRSHKYINGAPMETPDL SLSDNIDATD DLLPSLQLN EEFSTDILDDVQSLINPNTTKPENVLTW  
L PLRMRNL PDSFFNPP

rs:XP\_011165257 [XP\_011165257] transcriptional coactivator YAP1-A isoform X3 [Solenopsis invicta]. 47..61

MALNQDVVDQLSKSNPVVRVDQNSESDLQALFDTVLKPD SKRPLQVPLRMRNL PDSFFNPPSTGSKSPS

ISHSRENSADSAFGVAVTGGTPNGGGGAGGSGGTPSGGASGSGGGGGGGGGGGGGGGGGGGGNAAGVTGTGSGNAG  
AGGGANGTANAIAAAA AVAAAAGLTVSH PRAHSSPASLQQTYASAQQAPQHAPQPHARHHHHQKQRSYDVIAPTV  
DDLGLPTGW EQARTQEGQIYFLNHVTRTTTWEDPRKTA AAAANVA AVAAAVESNKNNALGPLPDGWEQARTQEGE  
VYFINHQTRTTSWFDPRI PSHLQRTPAAGVMLPQNWQLQOPTGIQSNQSLQACQQKIRLQSLQMECERLKQRRQE  
IIRQVSMQEMMLQQSRTDAAMPFLPSGISEHARTESADSGLGLGSAYPLPQTSDDFLNIDENMDGT SERHCSLN  
DLTKRLYRSHKYINGAPMETPDL SLSDNIDATDDLPSLQLNEEFSTDILDDVQSLINPNTTKPENVLTWL  
PLMRNLPDSFFNPP

rs:XP\_025986171 [XP\_025986171] transcriptional coactivator YAP1-A isoform  
X4 [Solenopsis invicta]. 47..61

MALNQDVVDQLSKSNPVVRVDQNSESDLQALFDTVLKPD SKRPLQVPLMRNLPDSFFNPPSTGSKSPS  
ISHSRENSADSAFGVAVTGGTPNGGGGAGGSGGTPSGGASGSGGGGGGGGGGGGGGGGGGGGNAAGVTGTGSGNAG  
AGGGANGTANAIAAAA AVAAAAGLTVSH PRAHSSPASLQQTYASAQQAPQHAPQPHARHHHHQKQRSYDVIAPTV  
DDLGLPTGW EQARTQEGQIYFLNHVTRTTTWEDPRKTA AAAANVA AVAAAVESNKNNALGPLPDGWEQARTQEGE  
VYFINHQTRTTSWFDPRI PSHLQRTPAAGVMLPQNWQLQOPTGIQSNQSLQACQQKIRLQSLQMECERLKQRRQE  
IIRQQEMMLQQSRTDAAMPFLPSGISEHARTESADSGLGLGSAYPLPQTSDDFLNIDENMDGT SERHCSLN  
DLTKRLYRSHKYINGAPMETPDL SLSDNIDATDDLPSLQLNEEFSTDILDDVQSLINPNTTKPENVLTWL  
PLMRNLPDSFFNPP

rs:XP\_011165258 [XP\_011165258] transcriptional coactivator YAP1-A isoform  
X5 [Solenopsis invicta]. 47..61

MALNQDVVDQLSKSNPVVRVDQNSESDLQALFDTVLKPD SKRPLQVPLMRNLPDSFFNPPSTGSKSPS  
ISHSRENSADSAFGVAVTGGTPNGGGGAGGSGGTPSGGASGSGGGGGGGGGGGGGGGGGGGGNAAGVTGTGSGNAG  
AGGGANGTANAIAAAA AVAAAAGLTVSH PRAHSSPASLQQTYASAQQAPQHAPQPHARHHHHQKQRSYDVIAPTV  
DDLGLPTGW EQARTQEGQIYFLNHVTRTTTWEDPRKTA AAAANVA AVAAAVESNKNNALGPLPDGWEQARTQEGE  
VYFINHQTRTTSWFDPRI HI IYSASHLQRTPAAGVMLPQNWQLQOPTGIQSNQSLQACQQKIRLQSLQMECERLK  
QRRQE IIRQVSMQEMMLQQSRTDAAMPFLPSGISEHARTESADSGLGLGSAYPLPQTSDDFLNIDENMDGTSDG  
APMETPDL SLSDNIDATDDLPSLQLNEEFSTDILDDVQSLINPNTTKPENVLTWL PLMRNLPDSFFNPP

rs:XP\_011165259 [XP\_011165259] transcriptional coactivator YAP1-A isoform  
X6 [Solenopsis invicta]. 47..61

MALNQDVVDQLSKSNPVVRVDQNSESDLQALFDTVLKPD SKRPLQVPLMRNLPDSFFNPPSTGSKSPS  
ISHSRENSADSAFGVAVTGGTPNGGGGAGGSGGTPSGGASGSGGGGGGGGGGGGGGGGGGGGNAAGVTGTGSGNAG  
AGGGANGTANAIAAAA AVAAAAGLTVSH PRAHSSPASLQQTYASAQQAPQHAPQPHARHHHHQKQRSYDVIAPTV  
DDLGLPTGW EQARTQEGQIYFLNHVTRTTTWEDPRKTA AAAANVA AVAAAVESNKNNALGPLPDGWEQARTQEGE  
VYFINHQTRTTSWFDPRI HI IYSASHLQRTPAAGVMLPQNWQLQOPTGIQSNQSLQACQQKIRLQSLQMECERLK  
QRRQE IIRQVSMQEMMLQQSRTDAAMPFLPSGISEHARTESADSGLGLGSAYPLPQTSDDFLNIDENMDGT SER  
HCSLN DLTKRLYRSHKYINGAPMETPDL SLSDNIDATDDLPSLQVWWYNGNVN PLMRNLPDSFFNPP

rs:XP\_025986172 [XP\_025986172] transcriptional coactivator YAP1 isoform  
X7 [Solenopsis invicta]. 47..61

MALNQDVVDQLSKSNPVVRVDQNSESDLQALFDTVLKPD SKRPLQVPLMRNLPDSFFNPPSTGSKSPS  
ISHSRENSADSAFGVAVTGGTPNGGGGAGGSGGTPSGGASGSGGGGGGGGGGGGGGGGGGGGNAAGVTGTGSGNAG  
AGGGANGTANAIAAAA AVAAAAGLTVSH PRAHSSPASLQQTYASAQQAPQHAPQPHARHHHHQKQRSYDVIAPTV  
DDLGLPTGW EQARTQEGQIYFLNHVTRTTTWEDPRKTA AAAANVA AVAAAVESNKNNALGPLPDGWEQARTQEGE  
VYFINHQTRTTSWFDPRI HI IYSASHLQRTPAAGVMLPQNWQLQOPTGIQSNQSLQACQQKIRLQSLQMECERLK  
QRRQE IIRQQEMMLQQSRTDAAMPFLPSGISEHARTESADSGLGLGSAYPLPQTSDDFLNIDENMDGTSDGAPM  
ETPDL SLSDNIDATDDLPSLQLNEEFSTDILDDVQSLINPNTTKPENVLTWL PLMRNLPDSFFNPP

rs:XP\_011165262 [XP\_011165262] transcriptional coactivator YAP1 isoform  
X8 [Solenopsis invicta]. 47..61

MALNQDVVDQLSKSNPVVRVDQNSESDLQALFDTVLKPD SKRPLQVPLMRNLPDSFFNPPSTGSKSPS  
ISHSRENSADSAFGVAVTGGTPNGGGGAGGSGGTPSGGASGSGGGGGGGGGGGGGGGGGGGGNAAGVTGTGSGNAG  
AGGGANGTANAIAAAA AVAAAAGLTVSH PRAHSSPASLQQTYASAQQAPQHAPQPHARHHHHQKQRSYDVIAPTV  
DDLGLPTGW EQARTQEGQIYFLNHVTRTTTWEDPRKTA AAAANVA AVAAAVESNKNNALGPLPDGWEQARTQEGE  
VYFINHQTRTTSWFDPRI PSHLQRTPAAGVMLPQNWQLQOPTGIQSNQSLQACQQKIRLQSLQMECERLKQRRQE  
IIRQQEMMLQQSRTDAAMPFLPSGISEHARTESADSGLGLGSAYPLPQTSDDFLNIDENMDGTSDGAPMETPDL  
SLSDNIDATDDLPSLQLNEEFSTDILDDVQSLINPNTTKPENVLTWL PLMRNLPDSFFNPP



rs:XP\_026154346 [XP\_026154346] protein **FAM181A** [Mastacembelus armatus].  
103..117

MANADSEVKTLLNFVNLAASSDIKAALDKSAPCRRSVDHRKYLQKQLKRFSQKYSRVPRCHAHRSAEYGC  
AKPMGPVHQSVKVAEKARSDVDVENMSAVEQVPMRKRQLPASFWEEPKLSQTKRENSHLGFKKSPAATSEGGES  
ERRKRSYDEDQVPLSASSRRSYTNKETLKLDLTSHHCVSVGCCPFQYHGHQVLHSHIVVPHPLGLWSKAAGT  
DTGRPEQPYGQKIHTHVVKPIPTKPTVQSPIFSVMFGFI PMRKRQLPASFWEEP

rs:XP\_026153482 [XP\_026153482] protein **FAM181B** [Mastacembelus armatus].  
155..169

MAVQTAIMNPQFMNFCFPGSVIEYDVEKSLDVSLGAEENDEYKETTDLDSFIDSASSNIKLALDKP  
VSKSRKVNHRKYLQKQIKRGTGIIITPGNVEETPAKRQASPLAQSPQLQSKTLPKRQDGVQASLQSKSLAALFSPVK  
DIRGEKTKKPLRHRNLPPSFFTEPANCSKVSSTSGMMLKDLERGNPDAAEFFELLGPDYSNMVSDQDLYQTMPL  
RVQPEMGAPDPTSYDAHHLVGGLLYSEPWTSCSGPSKLLGESLRTGPAQPPLYCHSETASGPLEDNALCTLAFFN  
FFTDCSIPQVTYDLCSGYNKANYSSL PLRHRNLPPSFFTEP

rs:XP\_026154302 [XP\_026154302] transcriptional coactivator YAP1  
[Mastacembelus armatus]. 45..59

MDPNQHNPAGHQIVHVRGDSETDLEALFNAVMPKSAIVPPSVPMMRKLKLPDSFFKPPPEPKSHSRQAS  
TDAGSGGALTPHHVRAHSSPASLQLGAVSGGMASAGASPOHLRQSSYEIPDDVPLPPGWEMAKTTSQORYFLNHI  
DQTTTWQDPRKALLQMNQAAPANSVPVQQQNLMPNAPASGLPEGWEQAITSEGEIYYINHKNKTTSWLDPRLDPRF  
AMNQQRISQSAPVKQGGQLPSSTHSSVMGSMNQMLRQOIKERLRLKQQEELLRQRPOELALRNQLPTSMDQDGS  
TNPVSSPMAQDARTMTANSSDPFLNSGTYHSRDESTDSGLS ISSYSVPRTPDFFLNSVDEMDTGDPLPPSMTTQP  
SRFPDYLDIIPGTDVLDLGTLEGESMAVEGEELMPSLQEQALSSDILNDMESVLAATKIDKESFLTWL  
PMRMRKLKLPDSFFKPP

rs:XP\_026184175 [XP\_026184175] transcriptional coactivator YAP1-like  
isoform X1 [Mastacembelus armatus].>rs:XP\_026184176 [XP\_026184176]  
transcriptional coactivator YAP1-like isoform X1 [Mastacembelus armatus].  
46..60

MDAHRGAPPAGQQIVHVRGDSQTELEALFNAVMPGKAGRQPPSVPMLRKLKLPDSFFRQPDPRGHSRQA  
SSDGGVCGSLTPHHVRAHSSPASLPVNSLSTQAADVAATTIVPDDVPLPHGWEMAKTPTGQRYFLNHLDKTTTWH  
DPRLTQLQSAQAHPISGTPVHAHSLSNPAPTTPQOSINPETGPLPEGWEQAVTADGEVYYIDHINKTTTWVDP  
LAQKMNPGVLGLVMQQRQEKERLRCKQGLPQIIIPQEAGGRNQMPGMDHNRNAQTLVPSLDVIRIRASNHEPTLN  
GAHSRNESTDSGLSVSSLPRTSDHMLSSVDHMDTGDSGEASMAEQESMPVLPMSGEELMPCIEGLSSDLLMDM  
ETVLSGSHMDRDSLLTWL PMRLRKLKLPDSFFRQP

rs:XP\_026184177 [XP\_026184177] transcriptional coactivator YAP1-like  
isoform X2 [Mastacembelus armatus]. 46..60

MDAHRGAPPAGQQIVHVRGDSQTELEALFNAVMPGKAGRQPPSVPMLRKLKLPDSFFRQPDPRGHSRQA  
SSDGGVCGSLTPHHVRAHSSPASLPVNSLSTQAADVAATTIVPDDVPLPHGWEMAKTPTGQRYFLNHLDKTTTWH  
DPRLTQLQSAQAHPISGTPVHAHSLSNPAPTTPQOSINPETAQKMNPGVLGLVMQQRQEKERLRCKQGLPQII  
PQEAGGRNQMPGMDHNRNAQTLVPSLDVIRIRASNHEPTLNGAHSRNESTDSGLSVSSLPRTSDHMLSSVDHMDT  
GDSGEASMAEQESMPVLPMSGEELMPCIEGLSSDLLMDMETVLSGSHMDRDSLLTWL  
PMRLRKLKLPDSFFRQP

rs:XP\_026222413 [XP\_026222413] protein **FAM181B** [Anabas testudineus].  
155..169

MAVQTAIMNPQFMNFCFPGSVMEYDVEKSLQVSLGAEENDEYKETTDLDSFIDSASSNIKLALDKP  
VSKSRKVNHRKYLQKQIKRGTGIIITPGNVEEAPVKRQGSPPAQSPQLQSKTLPKRQDGVQANLQSKSLAALFSPVK  
DIRGEKAKKPLRHRNLPPSFFTEPANCSKVSSTSGMTLKDLEGNPEAAEFFELLGPDYSNMISEQDHYQSMPL  
RVQPEVGLDPAASYDSHHLVGGLLYSEPWTSCSGPSKLLGESLRTGPAQPSLYCHSTEAAAGPVEDNTLCTLAFS  
NFFTDCSIPQVTYDLGSCNRANYSSL PLRHRNLPPSFFTEP

rs:XP\_026225556 [XP\_026225556] transcriptional coactivator YAP1 isoform  
X1 [Anabas testudineus]. 45..59

MDPNQHNPAGHQIVHVRGDSETDLEALFNAVMPKNTIVPPSVPMLRKLKLPDSFFKPPPEPKSHSRQAS  
TDAGSGGALTPHHVRAHSSPASLQLGAVSGGSLSGMGSAGASPOHLRQSSYEIPDDVPLPPGWEMAKTASGQRYF  
LNHIEQTTTWQDPRKALLQMNQPTPTSSVPVQQQNMNIPATGPLPDGWEQAITSEGEIYYINHKNKTTSWLDPR  
DPRYALNPQRITQSAPVKQGGPLPPSTHSGIMGTNNQLRQLQIEKERLRLKQQEELLRQRPOELALRNQLPTSMDQ

DGSTNPVSSPMAQDARTMTANSSDPFLNSGTYHSRDESTDSGLSMSSYSVPRTPDDFLNSVDEMDTGDPLQPSMG  
TQPSRFPDYLDIAIPGTDVDLGTLEGESMAVEGEELMPSLQEQALSSEILNDMESVLAATKIDKESFLTWL  
PMRLRKLKLPDSFFKPP

rs:XP\_026225560 [XP\_026225560] transcriptional coactivator YAP1 isoform  
X2 [Anabas testudineus]. 45..59

MDPNQHNPAGHQIVHVRGDSETDLEALFNAVMPKNTIVPPSVPMLRKLKLPDSFFKPPPEPKSHSRQAS  
TDAGSGGALTPHHVRAHSSPASLQLGAVSGGSLSGMGSAGASPOHLRQSSYEIPDDVPLPPGWEMAKTASGQRYF  
LNHIEQTTTQDPRKALLQMNQPTPTSSVPVQQQNMNPATDGEQAITSEGEIYYINHKNKTTSWLDPRLDPRY  
ALNPQRITQSAPVKQGGPLPPSTHSGIMGTNNQLRLQOIEKERLRLKQOELLRQRPQELALRNQLPTSMDQDGST  
NPVSSPMAQDARTMTANSSDPFLNSGTYHSRDESTDSGLSMSSYSVPRTPDDFLNSVDEMDTGDPLQPSMG  
RFPDYLDIAIPGTDVDLGTLEGESMAVEGEELMPSLQEQALSSEILNDMESVLAATKIDKESFLTWL  
PMRLRKLKLPDSFFKPP

rs:XP\_026209476 [XP\_026209476] protein **FAM181A** [Anabas testudineus].  
110..124

MKVLANMANADSEVKTLLNFVNLAASSDIKAAALDKSAPCRRSVDHRKYLQKQLKRFSQKYSRVPRCHTHR  
STEYGC TKPGTTAHQRLKGAEKVSSGAQDVENAGCAVEQVPMRKRQLPASFWEEP KLTQTKREHSHFGFKKSPAG  
TSEG DGI EKRRRSYDEDAKVTL SASGRSSAEKETL KLDLTSHHCVSVCGCCPFQYHG HQLLHSHIVAPHPPLGL  
WSKASVTETERPEHPYQGIHAHVVKPIPTKPTVQSPIFSVFGFI PMRKRQLPASFWEEP

rs:XP\_026227257 [XP\_026227257] transcriptional coactivator YAP1-like  
isoform X1 [Anabas testudineus].>rs:XP\_026227258 [XP\_026227258]  
transcriptional coactivator YAP1-like isoform X1 [Anabas testudineus].  
46..60

MDAHRGAPPAGQQVVHVRGDSQTELEALFNAVMPNSKEARHPASLPMRMRKLKLPDSFFRQPDPRGHSRQA  
SSDGGVCGSLTPHHVRAHSSPASLPVNSLSTPATDVAAAPIIPDDVPLPHGWEMAKTPTGQRYFLNHLDKTTTWH  
DPRLSQLQSAAAHPPIPGTPVHAHSLSNPAPTTQPQNIIPETGPLEGWEQAVTADGEVYYIDHINKTTTWDPHL  
AQKMNPGLLGLVMQQRQEKLRCEGLSAQITPQEAAGRNPMPGMDHNRNAQTLVPPLDVIRIRASNHEPTLNGAHS  
RNESTDSGLSISLPRSDHMLSSVDHMDTGDSGDTTSMTLQESMPVLPMSSEGEELMPCIEGLSSDLLMDMETV  
LSGSHMDRDSLLTWL PMRMRKLKLPDSFFRQP

rs:XP\_026227259 [XP\_026227259] transcriptional coactivator YAP1-like  
isoform X2 [Anabas testudineus]. 46..60

MDAHRGAPPAGQQVVHVRGDSQTELEALFNAVMPNSKEARHPASLPMRMRKLKLPDSFFRQPDPRGHSRQA  
SSDGGVCGSLTPHHVRAHSSPASLPVNSLSTPATDVAAAPIIPDDVPLPHGWEMAKTPTGQRYFLNHLDKTTTWH  
DPRLSQLQSAAAHPPIPGTPVHAHSLSNPAPTTQPQNIIPETAQKMNPGLLGLVMQQRQEKLRCEGLSAQITPQEA  
AGRNPMPGMDHNRNAQTLVPPLDVIRIRASNHEPTLNGAHSRNESTDSGLSISLPRSDHMLSSVDHMDTGDSG  
DTTSMTLQESMPVLPMSSEGEELMPCIEGLSSDLLMDMETVLSGSHMDRDSLLTWL PMRMRKLKLPDSFFRQP

rs:XP\_026243106 [XP\_026243106] protein **FAM181B** [Urocitellus parryii].  
221..235

MAVQAALLSTHPFVFPFGGSPDGLGSTFGALDKGCCFEDEETGAPAGALLSGAEGGDVREATRDLLSF  
IDSASSNIKLALDKPGKSKRKVNHRKYLQKQIKRCNGLMGASPPGPPSPAADTPAKRPLAAPSASTAAAPVHGK  
AAPRREASQAAAAASLQSRSLAALFDSL RHVSGGAEPVGGAVAVPVVTGLGGTSSGGAGGEASGPAGGS AVPGARK  
VPLRARNLPPSFFTEPSRAGGGGGCGSPGVS LGDLEKGA EAVEFFELLGSDYGAGTEAGVLLAAEPLDVFPPT  
GAAALRGPLELEPGLFEPPPAMVGNLIYPEPWSAPSCAPT KKS PMAAARGGLTLNESLRPLYPAPSDSPGGEDGT  
GHLASFAPFFPDCTLPPPPPHQVSYDYNAGYSRSAYSSLRWPDGVWEGAPGEEGAHRD PLRARNLPPSFFTEP

rs:XP\_026248236 [XP\_026248236] transcriptional coactivator YAP1 isoform  
X1 [Urocitellus parryii]. 85..99

MDPGQQPQPQQAPQGGQPPAQPPQGGPTSGPGQPAPPASQAAPQAPPAGHQIVHVRGDSETDLEALF  
NAVMPKNTANVPQTVPMRLRKLKLPDSFFKPPPEPKSHSRQASTDAGTAGALTPQHVRHSSPASLQLGAVSPGTLTP  
TGVVSGPAATPTAHLRQSSFEIPDDVPLPAGWEMAKTSSGQRYFLNHIDQTTTQDPRKAMLSQMNVPAPTSPP  
VQQNLMNTPSGPLPDGWEQAMTQDGEIYYINHKNKTTSWLDPRLDPRF GKAMNQRISQSAPVKQPPPLAPQSPQG  
GVMGSGSSNQQQMRLQQLQMEKERLRLKQOELLRQVRPQAMRNINPSTANSPKCQELALRSQLPTLEQDGGTQN  
PVSSPGMSQELRTMTTNSDPFLNSGTYHSRDESTDSGLSMSSYSVPRTPDDFLNSVDEMDTGDINQSTLPSQQ  
NRFPDYLEAIPGTNVDLGTLEGDGMNIEGEELMPSLQEQALSSEILNDMESVLAATKIDKESFLTWL  
PMRLRKLKLPDSFFKPP

rs:XP\_026248237 [XP\_026248237] transcriptional coactivator YAP1 isoform X2 [Urocitellus parryii]. 85..99

MDPGQQPQPQQAPQGGQPPAQPPQGGQPTSGPGQPAPPASQAAPQAPPAGHQIVHVRGDSETDLEALF  
NAVMPKNTANVPQTVPMRLRKLKLPDSFFKPPPEPKSHSRQASTDAGTAGALTPQHVRHSSPASLQLGAVSPGTLTP  
TGVVSGPAATPTAQHLRQSSFEIPDDVPLPAGWEMAKTSSGQRYFLNHIDQTTTWQDPRKAMLSQMNVPAPTSPP  
VQQNLMNTPSGPLPDGWEQAMTQDGEIYYINHKNTTSWLDPRLDPRFAMNQRISQSAPVKQPPPLAPQSPQGGV  
MGSGSSNQQQMRLQQLQMEKERLRLKQOELLRQVRPQAMRNINPSTANSPKCQELALRSQLEQDGGTQNPV  
SSPGMSQELRTMTTNSDPFLNSGTYHSRDESTDSGLSMSSYSVPRTPDFFLNSVDEMDTGDITNQSTLPSQQNR  
FPDYLEAIPGTNVDLGTLEGDGMNIEGEEELMPSLQEQALSSDILNDMESVLAATKLDKESFLTWL  
PMRLRKLKLPDSFFKPP

rs:XP\_026248238 [XP\_026248238] transcriptional coactivator YAP1 isoform X3 [Urocitellus parryii]. 85..99

MDPGQQPQPQQAPQGGQPPAQPPQGGQPTSGPGQPAPPASQAAPQAPPAGHQIVHVRGDSETDLEALF  
NAVMPKNTANVPQTVPMRLRKLKLPDSFFKPPPEPKSHSRQASTDAGTAGALTPQHVRHSSPASLQLGAVSPGTLTP  
TGVVSGPAATPTAQHLRQSSFEIPDDVPLPAGWEMAKTSSGQRYFLNHIDQTTTWQDPRKAMLSQMNVPAPTSPP  
VQQNLMNTPSGPLPDGWEQAMTQDGEIYYINHKNTTSWLDPRLDPRFGKAMNQRISQSAPVKQPPPLAPQSPQG  
GVMGSGSSNQQQMRLQQLQMEKERLRLKQOELLRQAMRNINPSTANSPKCQELALRSQLEQDGGTQNPVSS  
PGMSQELRTMTTNSDPFLNSGTYHSRDESTDSGLSMSSYSVPRTPDFFLNSVDEMDTGDITNQSTLPSQQNRFP  
DYLEAIPGTNVDLGTLEGDGMNIEGEEELMPSLQEQALSSDILNDMESVLAATKLDKESFLTWL  
PMRLRKLKLPDSFFKPP

rs:XP\_026248239 [XP\_026248239] transcriptional coactivator YAP1 isoform X4 [Urocitellus parryii]. 85..99

MDPGQQPQPQQAPQGGQPPAQPPQGGQPTSGPGQPAPPASQAAPQAPPAGHQIVHVRGDSETDLEALF  
NAVMPKNTANVPQTVPMRLRKLKLPDSFFKPPPEPKSHSRQASTDAGTAGALTPQHVRHSSPASLQLGAVSPGTLTP  
TGVVSGPAATPTAQHLRQSSFEIPDDVPLPAGWEMAKTSSGQRYFLNHIDQTTTWQDPRKAMLSQMNVPAPTSPP  
VQQNLMNTPSGPLPDGWEQAMTQDGEIYYINHKNTTSWLDPRLDPRFAMNQRISQSAPVKQPPPLAPQSPQGGV  
MGSGSSNQQQMRLQQLQMEKERLRLKQOELLRQAMRNINPSTANSPKCQELALRSQLEQDGGTQNPVSSPG  
MSQELRTMTTNSDPFLNSGTYHSRDESTDSGLSMSSYSVPRTPDFFLNSVDEMDTGDITNQSTLPSQQNRFPDY  
LEAIPGTNVDLGTLEGDGMNIEGEEELMPSLQEQALSSDILNDMESVLAATKLDKESFLTWL  
PMRLRKLKLPDSFFKPP

rs:XP\_026248240 [XP\_026248240] transcriptional coactivator YAP1 isoform X5 [Urocitellus parryii]. 85..99

MDPGQQPQPQQAPQGGQPPAQPPQGGQPTSGPGQPAPPASQAAPQAPPAGHQIVHVRGDSETDLEALF  
NAVMPKNTANVPQTVPMRLRKLKLPDSFFKPPPEPKSHSRQASTDAGTAGALTPQHVRHSSPASLQLGAVSPGTLTP  
TGVVSGPAATPTAQHLRQSSFEIPDDVPLPAGWEMAKTSSGQRYFLNHIDQTTTWQDPRKAMLSQMNVPAPTSPP  
VQQNLMNTPSGPLPDGWEQAMTQDGEIYYINHKNTTSWLDPRLDPRFGKAMNQRISQSAPVKQPPPLAPQSPQG  
GVMGSGSSNQQQMRLQQLQMEKERLRLKQOELLRQVRPQELALRSQLEQDGGTQNPVSSPGMSQELRTMTT  
NSSDPFLNSGTYHSRDESTDSGLSMSSYSVPRTPDFFLNSVDEMDTGDITNQSTLPSQQNRFPDYLEAIPGTNVD  
LGTLEGDGMNIEGEEELMPSLQEQALSSDILNDMESVLAATKLDKESFLTWL PMRLRKLKLPDSFFKPP

rs:XP\_026248241 [XP\_026248241] transcriptional coactivator YAP1 isoform X6 [Urocitellus parryii]. 85..99

MDPGQQPQPQQAPQGGQPPAQPPQGGQPTSGPGQPAPPASQAAPQAPPAGHQIVHVRGDSETDLEALF  
NAVMPKNTANVPQTVPMRLRKLKLPDSFFKPPPEPKSHSRQASTDAGTAGALTPQHVRHSSPASLQLGAVSPGTLTP  
TGVVSGPAATPTAQHLRQSSFEIPDDVPLPAGWEMAKTSSGQRYFLNHIDQTTTWQDPRKAMLSQMNVPAPTSPP  
VQQNLMNTPSGPLPDGWEQAMTQDGEIYYINHKNTTSWLDPRLDPRFAMNQRISQSAPVKQPPPLAPQSPQGGV  
MGSGSSNQQQMRLQQLQMEKERLRLKQOELLRQVRPQELALRSQLEQDGGTQNPVSSPGMSQELRTMTTNS  
SDPFLNSGTYHSRDESTDSGLSMSSYSVPRTPDFFLNSVDEMDTGDITNQSTLPSQQNRFPDYLEAIPGTNVDL  
GTLEGDGMNIEGEEELMPSLQEQALSSDILNDMESVLAATKLDKESFLTWL PMRLRKLKLPDSFFKPP

rs:XP\_026248242 [XP\_026248242] transcriptional coactivator YAP1 isoform X7 [Urocitellus parryii]. 85..99

MDPGQQPQPQQAPQGGQPPAQPPQGGQPTSGPGQPAPPASQAAPQAPPAGHQIVHVRGDSETDLEALF  
NAVMPKNTANVPQTVPMRLRKLKLPDSFFKPPPEPKSHSRQASTDAGTAGALTPQHVRHSSPASLQLGAVSPGTLTP  
TGVVSGPAATPTAQHLRQSSFEIPDDVPLPAGWEMAKTSSGQRYFLNHIDQTTTWQDPRKAMLSQMNVPAPTSPP  
VQQNLMNTPSGPLPDGWEQAMTQDGEIYYINHKNTTSWLDPRLDPRFGKAMNQRISQSAPVKQPPPLAPQSPQG

GVMGSGSSNQQQMRLQQLQMEKERLRLKQOELLRQELALRSQLPTLEQDGGTQNPVSSPGMSQELRTMTTNSSD  
PFLNSGTYHSRDESTDSGLSMSSYSVPRTPDDFLNSVDEMDTGDTINQSTLPSQQNRFPDYLEAIPGTNVDLGLT  
EGDGMNIEGEEMLPSLQEQALSSDILNDMESVLAATKLDKESFLTWL PMRLRKLPSDFFKPP

rs:XP\_026248243 [XP\_026248243] transcriptional coactivator YAP1 isoform  
X8 [Urocitellus parryii]. 85..99

MDPGQQPQQAPQGGQPPAQPPQGGPTSGPGQPAPPASQAAPQAPPAGHQIVHVRGDSETDLEALF  
NAVMNPKTANVPQTVPMRLRKLPSDFFKPPEPKSHSRQASTDAGTAGALTPQHVRHSSPASLQLGAVSPGTLTP  
TGVVSGPAATPTAQHLRQSSFEIPDDVPLPAGWEMAKTSSGQRYFLNHIDQTTTWQDPRKAMLSQMNVPAPTSPP  
VQQNLMNTPSGPLPDGWEQAMTQDGEIYYINHKNKTTSWLDPRLDPRFAMNQRISSAPVKQPPPLAPQSPQGGV  
MGSGSSNQQQMRLQQLQMEKERLRLKQOELLRQELALRSQLPTLEQDGGTQNPVSSPGMSQELRTMTTNSSDPF  
LNSGTYHSRDESTDSGLSMSSYSVPRTPDDFLNSVDEMDTGDTINQSTLPSQQNRFPDYLEAIPGTNVDLGLTLE  
GDMNIEGEEMLPSLQEQALSSDILNDMESVLAATKLDKESFLTWL PMRLRKLPSDFFKPP

rs:XP\_026250062 [XP\_026250062] protein **FAM181A** [Urocitellus  
parryii].>rs:XP\_026250063 [XP\_026250063] protein **FAM181A** [Urocitellus  
parryii]. 129..143

MASDSVDMKLLNFVNLASSDIKAALDKSAPCRRSVDHRKYLQKQLKRFSQKCSRLPRGLPGRAAEPLK  
RGPEDRPGRLPLHSGPGASPGGGGGCQEKALGNPLREERLPKEQSLQGQSPDAAKPGQVPMRKRQLPASFWEEP  
PTHSYPLGLEGLGREGPPYESSKKSCKGLES LGPETAPVPMSPRALADKEPLKMPGVSLVGRVDAWSCCPLQYH  
GQPMYPGPPGALSQVPLCLWRKSPASPGELALFCKEVEGPGQKVHRPVVLPKPIPTKPAVPPPIFNVFGYL  
PMRKRQLPASFWEEP

rs:XP\_026282008 [XP\_026282008] uncharacterized protein LOC113208941  
[Frankliniella occidentalis]. 97..111

MDHRDDSGLGAVQDADDADLLGAVRDHHDYAKRRRSGSDRENNVVSELDELSLPVPPKSKAVAGSKG  
LGKGRQLRDPEGGTYISARSARKSPLPMKLRALPASFWEQPNLNKGPSPTIFISALPPLGLCKEDGADGPRDA  
LRGANPARGPGLGGGELGMQAGNGLVTHSPADTDLLFSLFRSVEPKTNLHRRTRGRPRRPPAPGPGGGAQRDDD  
PCLLGSILTSTLTSLSLACGHIADGRDRGVSAALRGAAAITVGADNNNFQAQILSDLVVVKL  
PMKLRALPASFWEQ

rs:XP\_026320225 [XP\_026320225] transcriptional coactivator YAP1-A isoform  
X1 [Hyposmocoma kahamanoa]. 44..58

MALNTDGEQKSNLVLVLDQDSETVLQSLFDTVLKPDSCRPLQVPLMRQLPKSFFNPPSTGSKSPSVSH  
SRENSADSAFGSSSATGAAPVSHSRAHSSPASLQQTYAAGQQTQQPPLHHQHTKORSYDVGSHIPDELGPLPAGW  
EQARTPEGQIYYLNHITKTTTWEDPRKSLAAQAVTNSVQHQAETLLSQNTAQTINSPTTAAKSTSSNTTTDPL  
GSLPDGWEQATTPEGEIYFINHAARTTSWFDPRIPQHLQRTVPVGSTGAAGGDWASASLQACQQLRLQSLQLERE  
RLKHRQOEIRLQOELMARQASSIVSSLSGSTTVASTELPLDPFLSGLTDHQRQESADSGLGMAVTQSYMPHTPE  
DFLAGMDDRMDCSSETGANLDSTDIALGDNIDSTDDLVSLLQSEFPNDILLDDVQSLINSTPSKPDNVLTLW  
PLMRQLPKSFFNPP

rs:XP\_026320226 [XP\_026320226] transcriptional coactivator YAP1 isoform  
X2 [Hyposmocoma kahamanoa]. 44..58

MALNTDGEQKSNLVLVLDQDSETVLQSLFDTVLKPDSCRPLQVPLMRQLPKSFFNPPSTGSKSPSVSH  
SRENSADSAFGSSSATGAAPVSHSRAHSSPASLQQTYAAGQQTQQPPLHHQHTKORSYDVGSHIPDELGPLPAGW  
EQARTPEGQIYYLNHITKTTTWEDPRKSLAAQAVTNSVQHQAETLLSQNTAQTINSPTTAAKSTSSNTTTDPLG  
SLPDGWEQATTPEGEIYFINHAARTTSWFDPRIPQHLQRTVPVGSTGAAGGDWASASLQACQQLRLQSLQLERER  
LKHRQOEIRLQOELMARQASSIVSSLSGSTTVASTELPLDPFLSGLTDHQRQESADSGLGMAVTQSYMPHTPE  
FLAGMDDRMDCSSETGANLDSTDIALGDNIDSTDDLVSLLQSEFPNDILLDDVQSLINSTPSKPDNVLTLW  
PLMRQLPKSFFNPP

rs:XP\_026320227 [XP\_026320227] transcriptional coactivator YAP1-A isoform  
X3 [Hyposmocoma kahamanoa]. 44..58

MALNTDGEQKSNLVLVLDQDSETVLQSLFDTVLKPDSCRPLQVPLMRQLPKSFFNPPSTGSKSPSVSH  
SRENSADSAFGSSSATGAAPVSHSRAHSSPASLQQTYAAGQQTQQPPLHHQHTKORSYDVGSHIPDELGPLPAGW  
EQARTPEGQIYYLNHITKTTTWEDPRKSLAAQAVTNSVQHQAETLLSQNTAQTINSPTTAAKSTSSNTTTDPL  
GSLPDGWEQATTPEGEIYFINHAARTTSWFDPRIPQHLQRTVPVGSTGAAGGDWASASLQACQQLRLQSLQLERE  
RLKHRQOEIRLQOELMARQASSIVSSLSGSTTVASTELPLDPFLSGLTDHQRQESADSGLGMAVTQSYMPHTPE

DFLAGMDDRMDCSSETGANLDSTDIALGDNIDSTDDLLSEFPNDILLDDVQSLINSTPSKPDNVLTWL  
PLRMRQLPKSFFNPP

rs:XP\_026320229 [XP\_026320229] transcriptional coactivator YAP1 isoform  
X4 [Hyposmocoma kahamanao]. 44..58

MALNNTDGEQKSNLVLVRVDQDSETVLQSLFDTVLKPD SKRPLQVPLRMRQLPKSFFNPPSTGSKSPSVSH  
SRENSADSAFGSSSATGAAPVSHSRAHSSPASLQQT YAAGQQTQQPPLHHQHTKQRSYDVGSHIPDELGLPAGW  
EQARTPEGQIYYLNHITKTTTWEDPRKSLAAQAVTNSVQHQAETLLSQNTAQTINSPTTAAQHLQRTFVVGSTGA  
AGGDWASASLQACQKLRQLSLQLERERLKHRRQEI RLQOELMARQASSIVSSLSGSTTVASTELPLDPFLSGLT  
DHQRQESADSGLGMAVQTQSYMPHTPEDFLAGMDDRMDCSSETGANLDSTDIALGDNIDSTDDLVSSQLSEFPN  
DILLDDVQSLINSTPSKPDNVLTWL PLRMRQLPKSFFNPP

rs:XP\_026320230 [XP\_026320230] transcriptional coactivator yorkie isoform  
X5 [Hyposmocoma kahamanao]. 44..58

MALNNTDGEQKSNLVLVRVDQDSETVLQSLFDTVLKPD SKRPLQVPLRMRQLPKSFFNPPSTGSKSPSVSH  
SRENSADSAFGSSSATGAAPVSHSRAHSSPASLQQT YAAGQQTQQPPLHHQHTKQRSYDVGSHIPDELGLPAGW  
EQARTPEGQIYYLNHITKTTTWEDPRKSLAAQAVTNSVQHQAETLLSQNTAQTINSPTTAAQHLQRTFVVGSTGA  
AGGDWASASLQACQKLRQLSLQLERERLKHRRQEI RLQOELMARQASSIVSSLSGSTTVASTELPLDPFLSGLT  
DHQRQESADSGLGMAVQTQSYMPHTPEDFLAGMDDRMDCSSETGANLDSTDIALGDNIDSTDDLLSEFPNDILL  
DVQSLINSTPSKPDNVLTWL PLRMRQLPKSFFNPP

rs:XP\_026373987 [XP\_026373987] protein **FAM181B** [Ursus arctos horribilis].  
221..235

MAVQAALLSTHPFVVFVGGSPDGLGGAFGALDKGCCFEDDETGTPAGALLAGAEGGDVREATRDLLSF  
IDSASSNIKLALDKPGKSKRVNHRKYLQKQIKRCSGLMGAAPPGPSGAADTPAKRPLAAHGAQTVAVPPHGK  
AAPRREASQAAAAASLQSRSLAALFDSLHVPGGDERAGGSAAAPVVLGGAGAGGSGGDAAGPVGGTAVPGARK  
VPLRARNLPPSFFTEPSRAGGGCGPSGPGVSLGDLEKGAEEVEFFELLGPDYAGAGTEASVLLAAEPLDVFPPTGA  
AVLRGPPELEPGLFEPPEPAMVGSLLYSESWSSPGCPPTKKPPLAARPGGLTLNEPLRPLYPSAADSPPGGEDGPG  
LASFAPFFSDCALPPPPPHQVSYEYSAGYSRTAYSSLWRPDGVWEGAPGEEGAHRD PLRARNLPPSFFTEP

rs:XP\_026476618 [XP\_026476618] transcriptional coactivator YAP1-like  
[Ctenocephalides felis]. 46..60

MALNQDLEQQKPHHIVTMDQNSDSLQALFDSVLKPDSTKKPLQVPPFRMRNLNSFFNPPSTGSKSPSI  
SHSRENSADSAFGSAAGGGSAGAGGQVTVPGLVSHSRAHSSPASLQQTYNGSVLGAQTQAQQQHMMKQRSYDV  
VSAAQLQEELGLPPGWEQARTLEGQIYYLNHVTRTTTTWDDPRKTLAAQAAAQHSADTLLSAPAQAQQQTAVS  
KATSPTNDALGLPEGWEQAATAEGEIYFINHQARTTSWFDPRIPHTLQSPGTCVPGHTAAMQOSWLAGNGGGT  
AANAVSGTGPVGATVGGQSSVVHQASQKLRQLQOERERLKRQHEIRMQELMRQQTSTELQMDPFLSGVTDH  
SRQESADSGLGNGPYMPHTPEDFLANIDDNMDCASESGAAMDATDISALSNDIDSTEDLVPSLQLGEDFSSDI  
LEDVQSLINPVAKPDNELTWL PFRMRNLNSFFNPP

rs:XP\_026465940 [XP\_026465940] transcriptional coactivator yorkie-like,  
partial [Ctenocephalides felis]. 46..60

MALNQDLEQQKPHHIVTMDQNSDSLQALFDSVLKPDSTKKPLQVPPFRMRNLNSFFNPPSTGSKSPSI  
SHSRENSADSAFGSAAGGGSAGAGGQVTVPGLVSHSRAHSSPASLQQTYNGSVLGAQTQAQQQHMMKQRSYDV  
VSAAQLQEELGLPPGWEQARTLEGQIYYL PFRMRNLNSFFNPP

rs:XP\_026475527 [XP\_026475527] transcriptional coactivator yorkie-like  
[Ctenocephalides felis]. 46..60

MALNQDLEQQKPHHIVTMDQNSDSLQALFDSVLKPDSTKKPLQVPPFRMRNLNSFFNPPSTGSKSPSI  
SHSRENSADSAFGSAAGGGSAGAGGQVTVPGLVSHSRAHSSPASLQQTYNGSVLGPQTQAQQQHMMKQRSYDV  
VSAAQLQEELGLPPGWEQARTLEGQIYYLK PFRMRNLNSFFNPP

rs:XP\_026531432 [XP\_026531432] transcriptional coactivator YAP1 [Notechis  
scutatus]. 84..98

MDVAGQPQQAPSGAAAAPQPSSAQPTGQPSPPAPQPGGAVSGPPAGHVHVVRGDSETDLEALFN  
AVMNPKGANVPHTLPMRLRKLKLPDSFFKPEPKAHSRQASTDAGTAGALTPQHVRHSSPALLGTVSPVALTPSVV  
VPGGTSPQHLRQSSFEIPDDVPLPPGWEMAKTPSGQRYFLNHIDQTTTTWQDPRKTLQSMNVPAPTSPPVQQNIM  
NSATGPLPEGWEQAMTQDGEIYYINHKNTTSWLDPRLDPRFGKSSWHLKFFPPVHPPFPQSFLNWQELALRSQ  
LPSMEQDGTQNRVSSPGMSQELRTMTTNSSDPFLNSGTYHSRDESTDSGLSMSSYSVPRTPDDFLNSVDEMDTGD

TINQSSIPSHQNRFPDYLEAIPGTNVDLGTLEGDAMNIEGEEELMPSLQEALSSDILNDMESVLAATKLDKESFLT  
WL PMRLRKLKLPDSFFKPP

rs:XP\_026535010 [XP\_026535010] protein **FAM181A** [Notechis scutatus].  
142..156

MASADSEVKTLNLFVNLAASSDIKAALDKSAPCRRSVDHRKYLQKQLKRFSQKYSRLPRCHHHHHHHHHHL  
QPQLPPARERRPPEGRARGLSPESLGRGHGAPGPAKGDKASKAPERLGGEQQQQQQQAGTSEAGARPDQVPMR  
KRQLPASFWEEPRPAPGSPGVVSGVIFPVGVCSSPSSSSSSPSSSSKDLPPYEGKKNIIIGLDGGGTGTVPESPQR  
PEAEDALKGLRTWGCCPFQYHGPQASPGVYPPPLPAALPPAAPFSALGSRKWDAPSPTGEAFCQPGQKVYRPVV  
WKPIPTKPAAPPLIFSVFSYL PMRKRQLPASFWEEP

rs:XP\_026536299 [XP\_026536299] protein **FAM181B** [Notechis scutatus].  
239..253

MAVQAAPLPPPHHPFGPFGFPAADFGALVEKSCYGGDALLLLEGGVGGATDGSCGALDGCNEAADFRE  
ATRELLSFIDSASSNIKLALDKPGKSKRKNVHRKYLQKQIKRCTGLLGGNAEAASGTGPGSVPGPAAAAFASKQA  
PASTAPSSGGGAAAPSSSSSSCKLPPPAKRESKSLAALFDSWRASPFQPGGAPTTLVATPDSAPAGPHGASGLQ  
DRATAAAVVPAPLACKKVPLRNRNLPRSFTEPAPNRPAPNAGLEGGAAPSVAEELFELLTAPDYRALLKEAA  
EPPPPPPVFPFPGSALQAAAELPLEPPLYEPLPSLAPLLYAETPLRPLPALYAABAASVSDPAAPFFADCPPLPPPP  
AMPYDYGYSRGAPYSSL PLRNRNLPRSFTEP

rs:XP\_026561201 [XP\_026561201] protein **FAM181A** [Pseudonaja textilis].  
145..159

MASADSEVKTLNLFVNLAASSDIKAALDKSAPCRRSVDHRKYLQKQLKRFSQKYSRLPRCHHHHHHHHHHL  
LQPQLPPARERRPPEGRARGLSPERSLGRGHGASGPAKGDKASKAPERLGGEQQQQQQQQQAGTSEAGARPDQV  
PMRKRQLPASFWEEPRPAPGSPGVVSGVIFPVGVCSSPSSSSSSPSSSSKDLPPYEGKKNIIIGLDGGGTGTVPESP  
QRRPEAEAALKGLRTWGCCPFQYHGPQASPGVYPPPLPAALPPAAPFSALGSRKWDAPSPTGEAFCQPGQKVYR  
PVVWKPIPTKPSAPPLIFSVFSYL PMRKRQLPASFWEEP

rs:XP\_026562550 [XP\_026562550] protein **FAM181B** [Pseudonaja textilis].  
223..237

MAVQAAPLPPPHHPFGPFGFPAADFGALVEKSCYGDGGGTLTLLLEGGVGGATDGSCGALDGCNNEAADF  
REATRELLSFIDSASSNIKLALDKPGKSKRKNVHRKYLQKQIKRCTGLLGGNAEAAPGTGPGSVPGPAAVAAAVP  
ASKQLPPPAAKRESKSLAALFDSWRSSPFQPGGAPTTLVATPDSAPVGPVGHGASGLQDRAASASASAVVPPAPLAC  
KKVPLRNRNLPRSFTEPAPNRPAPNAGLEGGAAPSVAEELFELLTAPDYRALLKEAAEPPPPVFPFPGSALQA  
AAELPLEPPLYEPLPSLAPLLYAETPLRPLPALYAABAASVSDPSAPFFADCPPLPPPPAMPYDYGYSRGAPYSSL  
PLRNRNLPRSFTEP

rs:XP\_026562669 [XP\_026562669] transcriptional coactivator YAP1 isoform  
X1 [Pseudonaja textilis]. 84..98

MDVAGQPQQAPSGAAAAPQPSSAQPTGQPSPPAPQPGGAVSGPPPAGHQVVHVRGDSETDLEALFN  
AVMNPKGANVPHTLPMRLRKLKLPDSFFKPPPEPKAHSRQASTDAGTAGALTPQHVRHSSPALLGTVSPVALTPSGV  
VPGGTSPQHLRQSSFEIPDDVPLPPGWEMAKTPSGQRYFLNHIDQTTTWQDPRKTLTLLSQMNVPAPTSPPVQQNIM  
NSATGPLPEGWEQAMTQDGEIYYINHKNKTTSWLDPRLDPRFAMNQRISQSAPVKQPPPLASQSPGGVLLGGGTS  
NQQQQIRLQQLQMEKERLRQKHQELLRQVRPQALRNINPSTANAPKRQELALRSQQLPSMEQDGTQNRVSSPGMSQ  
ELRTMTTNSSDPFLNSGTYHSRDESTDSGLSMSSYSVPRTPDDFLNSVDEMDTGDTINQSSIPSHQNRFPDYLEA  
IPGTNVDLGTLEGDAMNIEGEEELMPSLQEALSSDILNDMESVLAATKLDKESFLTWL PMRLRKLKLPDSFFKPP

rs:XP\_026562670 [XP\_026562670] transcriptional coactivator YAP1 isoform  
X2 [Pseudonaja textilis]. 84..98

MDVAGQPQQAPSGAAAAPQPSSAQPTGQPSPPAPQPGGAVSGPPPAGHQVVHVRGDSETDLEALFN  
AVMNPKGANVPHTLPMRLRKLKLPDSFFKPPPEPKAHSRQASTDAGTAGALTPQHVRHSSPALLGTVSPVALTPSGV  
VPGGTSPQHLRQSSFEIPDDVPLPPGWEMAKTPSGQRYFLNHIDQTTTWQDPRKTLTLLSQMNVPAPTSPPVQQNIM  
NSATGPLPEGWEQAMTQDGEIYYINHKNKTTSWLDPRLDPRFAMNQRISQSAPVKQPPPLASQSPGGVLLGGGTS  
NQQQQIRLQQLQMEKERLRQKHQELLRQALRNINPSTANAPKRQELALRSQQLPSMEQDGTQNRVSSPGMSQELRT  
MTTNSSDPFLNSGTYHSRDESTDSGLSMSSYSVPRTPDDFLNSVDEMDTGDTINQSSIPSHQNRFPDYLEAIPGT  
NVDLGTLEGDAMNIEGEEELMPSLQEALSSDILNDMESVLAATKLDKESFLTWLPMRLRKLKLPDSFFKPP

rs:XP\_026562671 [XP\_026562671] transcriptional coactivator YAP1 isoform  
X3 [Pseudonaja textilis]. 84..98

MDVAGQPQQAPSGAAAAPQPSSAQPTGQPSPPAPQPGGGAVSGPPPAGHQVVHVRGDSETDLEALFN  
AVMNPKGANVPHTLPMRLRKLKLPDSFFKPPPEPKAHSRQASTDAGTAGALTPQHVRHSSPALLGTVSPVALTPSGV  
VPGGTPSQHLRQSSFEIPDDVPLPPGWEMAKTPSGQRYFLNHIDQTTTQWQDPRKTLTLLSQMNVPAPTSPPVQQNIM  
NSATAMNQRISQSAPVKQPPPLASQSPGGVLLGGGTSNQQQQIRLQQLQMEKERLRQKHQELLRQVRPQALRNIN  
PSTANAPKRQELALRSQQLPSMEQDGTQNRVSSPGMSQELRTMTTNSSDPFLNSGTYHSRDESTDSGLSMSSYSVP  
RTPDDFLNSVDEMDTGDITINQSSIPSHQNRFPDYLEAIPGTNVLDLGTLEGDAMNIEGEEELMPSLQEQALSSDILND  
MESVLAATKLDKESFLTWL PMRLRKLKLPDSFFKPP

rs:XP\_026562672 [XP\_026562672] transcriptional coactivator YAP1 isoform  
X4 [*Pseudonaja textilis*]. 84..98

MDVAGQPQQAPSGAAAAPQPSSAQPTGQPSPPAPQPGGGAVSGPPPAGHQVVHVRGDSETDLEALFN  
AVMNPKGANVPHTLPMRLRKLKLPDSFFKPPPEPKAHSRQASTDAGTAGALTPQHVRHSSPALLGTVSPVALTPSGV  
VPGGTPSQHLRQSSFEIPDDVPLPPGWEMAKTPSGQRYFLNHIDQTTTQWQDPRKTLTLLSQMNVPAPTSPPVQQNIM  
NSATAMNQRISQSAPVKQPPPLASQSPGGVLLGGGTSNQQQQIRLQQLQMEKERLRQKHQELLRQALRNINPSTA  
NAPKRQELALRSQQLPSMEQDGTQNRVSSPGMSQELRTMTTNSSDPFLNSGTYHSRDESTDSGLSMSSYSVPRTPD  
DFLNSVDEMDTGDITINQSSIPSHQNRFPDYLEAIPGTNVLDLGTLEGDAMNIEGEEELMPSLQEQALSSDILNDMESV  
LAATKLDKESFLTWL PMRLRKLKLPDSFFKPP

rs:XP\_018670705 [XP\_018670705] uncharacterized protein LOC100178849  
[*Ciona intestinalis*].>tr:A0A1W5BEC6\_CIOIN [A0A1W5BEC6] SubName:  
Full=uncharacterized protein LOC100178849

{ECO:0000313|RefSeq:XP\_018670705.1}; 527..541

MINNEARARSRLTTPKLHRRVVSQSQSSTKGAEYKCPPISTKDATNLLTDGFTENSQTNLSPRRPSIV  
PARKVSPTDGNCSPSPANGVSAACTAMANACSHDHDYISVEQPRIRRPPIITPSQISPASTVLQPRCVNSDRTN  
VSSLTAREDDSCYCPDIKSNRPIQQPVPPPKLLOPTIPNHAKPPREARCTLRRLRYFRQNDTGPSDKATATTEELS  
KNKLVFVSTSKTAEPRTHSRKQLQSEERRPNDLAQSEVGPTACLKMEESVAPQVVNNSDFNIKTDKLTVAWLS  
LVNSVGKGDANEKNLPDVPGEDIQAHFDLNHENQHSSAPLACASPNPPKVQQIGGDTDSCIGCPTKCNQHETDSA  
YSSLASSLCSPPPTSANVPLLSGFEFRPSSSRPASGSRPPSGGKRVAPCSLSSSSSSSSCATSSDDDDSDMSASSPR  
SDICRRDQMINPMIDDSHTHKPVVDKPHNSRSATRKGHKVVTTKNGKKFLRQKASSKQIMAGHLVLPPTPHKKP  
SSKKDSVPMRLRALPTSFWQEPNVRNPSYVLPVQPLFRQGYADNVADIRPVTPPAELENEVCVSDVEVRGDSP  
DKSTIINGGDPDLLFRLFDSVEPQNRVAIKNKRGRPKKTSREMPPPRLKLDNNPCIIQSITTEKLFPKLTIDRGC  
ISMHAADKSFNLEEDFGSYVSDDKDYSAIGLYALSQOQGRVLDDEQETSDEHMHVMSPAAMTRVTSLSLPLQSVN  
QDYSQMLSEVA AVL PMRLRALPTSFWQEP

rs:XP\_009859006 [XP\_009859006] transcriptional coactivator YAP1 isoform  
X1 [*Ciona intestinalis*].>tr:A0A1W3JPW8\_CIOIN [A0A1W3JPW8] SubName:  
Full=transcriptional coactivator YAP1 isoform X1

{ECO:0000313|RefSeq:XP\_009859006.1}; 50..64

MDMEENNEPTTQTTFTTHNQIIHVRQDSASELEALFNTVMNPNFKSKSLPMKARNLPKSFFTQPDKPRQ  
QAAYHHGHSQSVGGLVAPNSVQINHSRSSSSSDSNASHASAIHATNTNNGSSVGGSTTMAPGSPMNGNINHKS  
NYPMSPAQRRVAHGAFVNSQGHGSLQLPQVSHSRKSSPASLQLMDIGLSVKASDIPHDMPPLPHGWSAAKTADGQQ  
YYMNHNDRSTTWEDPRIGILKQQRQNVVMQNSIATNIHQVAPSHSPAHNISQSDVSQIPLPSGWEQAATPQGE  
IYFINHQTKSTSWVDPRFQGITPTNPPNNSQLQOQLMKVNVQMDISSVSQSRPTTTPAQQQSMLKHLVQEKE  
HLMRRQLMKQKQLSNPGENFMGGGNPSFHQRDASLDGSGVMGSNYSLPRTPDGFLNNVEEMETGDVSRRVHGNP  
QPATQQHTHTNNQRFDFDLDTLPASSVDFTSSPVPTSGGQRVCTTSASLDGSELVPSLQDLSLPQDFDVESMLNHV  
KTENMDNGMIWL PMKARNLPKSFFTQP

rs:XP\_002130260 [XP\_002130260] transcriptional coactivator YAP1 isoform  
X2 [*Ciona intestinalis*].>tr:A0A1W2WKP2\_CIOIN [A0A1W2WKP2] SubName:  
Full=transcriptional coactivator YAP1 isoform X2

{ECO:0000313|RefSeq:XP\_002130260.1}; 50..64

MDMEENNEPTTQTTFTTHNQIIHVRQDSASELEALFNTVMNPNFKSKSLPMKARNLPKSFFTQPDKPRQ  
QAAYHHGHSQSVGGLVAPNSVQINHSRSSSSSDSNASHASAIHATNTNNGSSVGGSTTMAPGSPMNGNINHKS  
NYPMSPAQRRVAHGAFVNSQGHGSLQLPQVSHSRKSSPASLQLMDIGLSVKASDIPHDMPPLPHGWSAAKTADGQQ  
YYMNHNDRSTTWEDPRIGILKQQRQNVVMQNSIATNIHQVAPSHSPAHNISQSDVSQIPLPSGWEQAATPQGE  
IYFINHQTKSTSWVDPRFQGITPTNPPNNSQLQOQLMKVNVQMDISSVSQSRPTTTPAQQQSMLKHLVQEKE  
HLMRRQLMKQKQLSNPGENFMGGGNPSFHQRDASLDGSGVMGSNYSLPRTPDGFLNNVEEMETGDVSRRVHGNPQ  
P

ATQQHTHTNNQRFPDFLDTLPASSVDFTSSPVPTSGGQRVCTTSASLDGSELVPSLQDLSLPQDFDVESMLNHVKT  
ENMDNGMIWL PMKARNLPKSFFTQP

rs:XP\_026841171 [XP\_026841171] transcriptional coactivator yorkie isoform  
X1 [Drosophila persimilis]. 65..79

MLTTMSTSNNTNIIIEKEIDDEDMLSPIKSSNNLVVRVNQDSTDNDLQALFDSVLNPGDAKRPLQLPFRMR  
KLPNSFFTPPAPSHSRANSADSTYDAGSQSNINKTAQPVDVQQPAISQIQPSQQSRLAIHHFRARSSPASLQQNY  
NVRSRSDANPGPSGGQPTYPENSAEFPNSAANTIELDGMNTCMGGQDMPMSTQTVHKKQRSYDVVSPIQQLQSOLG  
ALPPGWQAKTNDGQIYYLNHTTKSTQWEDPRIQYRQQQRLMAERIKQSDVLTQTTKQTTTSTIANSLGPLPDGW  
EQAVTDSGDIYFINHIDRTTSWIDPRMQSGLTGLDCPDNLVSSLQIEDNICTNLFNDAQTIVNPPSSHKPDDLEW  
YKIN PFRMRKLPNSFFTPP

rs:XP\_002016582 [XP\_002016582] transcriptional coactivator yorkie isoform  
X2 [Drosophila persimilis]. 65..79

MLTTMSTSNNTNIIIEKEIDDEDMLSPIKSSNNLVVRVNQDSTDNDLQALFDSVLNPGDAKRPLQLPFRMR  
KLPNSFFTPPAPSHSRANSADSTYDAGSQSNINKTAQPVDVQQPAISQIQPSQQSRLAIHHFRARSSPASLQQNY  
NVRSRSDANPGPSGGQPTYPENSAEFPNSAANTIELDGMNTCMGGQDMPMSTQTVHKKQRSYDVVSPIQQLQSOLG  
ALPPGWQAKTNDGQIYYLNHTTKSTQWEDPRIQYRQQQRLMAERIKQSESGLTGLDCPDNLVSSLQIEDNICT  
NLFNDAQTIVNPPSSHKPDDLEWYKIN PFRMRKLPNSFFTPP

rs:XP\_019889908 [XP\_019889908] transcriptional coactivator yorkie isoform  
X1 [Ooceraea biroi].>tr:A0A3L8DQS6\_OOCBI [A0A3L8DQS6] SubName:  
Full=Uncharacterized protein {ECO:0000313|EMBL:RLU22800.1}; 46..60

MALNQDVEQLSKSNLVVRIDQNSESDLQALFDTVLKPDSCRPLQVPLMRNLPESFFNPPSAGSKSPSI  
SHSRENSADSAFGAAVVATPNGGTERAGGGAGGGAPTGGAAAGGGNAAGGGNAAGAAGTGGGAAGGAAAAGGTGGG  
GANNPAGAVAVAAAAAAGLTVAHPRAHSSPASLQQTYASAQQAPQHAPQPHARHHHHQKQRSYDVISTVDDLGP  
LPHGWEQARTAEGQIYFLNHLTRTTTTWEDPRKTAASVAAVAAVAVESSKSNLGPLPDGWEQARTAEGELYFIN  
HQTRTTSWFDPRIPAHLQQRSPASNAMLQPNWLQPPSAIQNNQTLQACQKLRQLQSLQMERERLQKQRQQEIMR  
QQELMLRQSTTDAAMPFLSGINEQHARQESADSGLGLGSAYSLPHTPEDFLANIDDNMDGTSDDGAPMETPDMS  
TLNDPTDDLLPSLQLSDADFGSDILDDVQSLINPNTTKPENVTWL PLRMRNLPESFFNPP

rs:XP\_011351605 [XP\_011351605] transcriptional coactivator yorkie isoform  
X2 [Ooceraea biroi]. 46..60

MALNQDVEQLSKSNLVVRIDQNSESDLQALFDTVLKPDSCRPLQVPLMRNLPESFFNPPSAGSKSPSI  
SHSRENSADSAFGAAVVATPNGGTERAGGGAGGGAPTGGAAAGGGNAAGGGNAAGAAGTGGGAAGGAAAAGGTGGG  
GANNPAGAVAVAAAAAAGLTVAHPRAHSSPASLQQTYASAQQAPQHAPQPHARHHHHQKQRSYDVISTVDDLGP  
LPHGWEQARTAEGQIYFLNHLTRTTTTWEDPRKTAASVAAVAAVAVESSKSNLGPLPDGWEQARTAEGELYFIN  
HQTRTTSWFDPRIPAHLQQRSPASNAMLQPNWLQPPSAIQNNQTLQACQKLRQLQSLQMERERLQKQRQQEIMRQ  
QELMLRQSTTDAAMPFLSGINEQHARQESADSGLGLGSAYSLPHTPEDFLANIDDNMDGTSDDGAPMETPDMS  
LNDPTDDLLPSLQLSDADFGSDILDDVQSLINPNTTKPENVTWL PLRMRNLPESFFNPP

rs:XP\_026867400 [XP\_026867400] protein **FAM181A** [Electrophorus  
electricus]. 121..135

MASSDSEVKTLNLFVNLAASSDIKAALDKSAPCRRSVDHRKYLQKQLKRFSQKYSRMPRCHAHRITDASA  
PKITEDKPIILTHERAKNMSHLNEKQELNMRAGEDLDLNLNTEKQNLQSGQVPMRKRQLPASFWEEPSSQGSREY  
FEYAWKRSSNGIVRYESAESGGKRIKVHDEQKANLLLSNRRGTSDEPLKVDLTSTHVHLCGCCPFQYHGNHIF  
QSHLIAPHTNIPDVGLRSKIYGNFEDGLTNNTKHVVVKPIPTKPVSSSIFSVFGFI PMRKRQLPASFWEEP

rs:XP\_026868543 [XP\_026868543] transcriptional coactivator YAP1 isoform  
X1 [Electrophorus electricus]. 45..59

MDPSQHNPAGHQIVHVRGDSETDLEALFNAVMPKNAVPPSLPMRMRKLPDSFFKPPPEPKSHSRQAS  
TDAGTAGTITPQHVRHSSPASLQLGAVSPGTLAGMTAGTSPQHLRQPSYEIPDDVPLPPGWEMAKTASGQRYF  
LNHIDQSTTWQDPRKAMLQINQATPGSPAPVQQNLLNPASGPLPDGWEQAITAEGEIYYINHKNKTTSWLDPRL  
DPRYALNQQRISQSAPVKPGAPLPPSPQNAPI LGGNSQMRLQQLQMDKERLRLKHQELLRQRPQELALRNQLATS  
MEQDGGSQNPVSSPSMPQDARSMTTNSSDPFLNSGTYHSRDESTDSGLSMSSYSVPRTPDDFLNSVDEMETSDSL  
GPASMATQPNRFPDYLDIIPGTDVLDLGTLEGESMAVEGEELMPSLQEQALSSDILNDMESVLAATKIDKESFLTWL  
PMRMRKLPDSFFKPP



rs:XP\_026868544 [XP\_026868544] transcriptional coactivator YAP1 isoform X2 [Electrophorus electricus]. 45..59

MDPSQHNPAGHQIVHVRGDSETDLEALFNAVMPKNAVPPSLPMRMRKLPDSFFKPPPEPKSHSRQAS  
TDAGTAGTITPQHVRHSSPASLQLGAVSPGTLAGMTAGTSPQHLRQPSYEIPDDVPLPPGWEMAKTASGQRYF  
LNHIDQSTTWQDPRKAMLQINQATPGSPAPVQQNLLNPASALNQQRISQSAPVKPGAPLPPSPQNAPILGNSQ  
MRLQQLQMDKERLRLKHQELLRQRPQELALRNQLATSMEQDGGSONPVSSPSMPQDARSMTTNSDPFLNSGT  
SRDESTDSGLSMSSYSVPRTPDFFLNSVDEMETSDSLGPASMATQPNRFPDYLDIAPGTDVDLGTLEGESMAVEG  
EELMPSLQEQALSSDILNDMESVLAATKIDKESFLTWL PMRMRKLPDSFFKPP

rs:XP\_026851499 [XP\_026851499] protein **FAM181B** [Electrophorus electricus]. 156..170

MAVQTAIMNSQFLGFCFPGSVMEFGAEKVLLEGRLLEVDGEGDVRQTSRDLLSFINSASSNIKLALDKP  
VKSKRKVNHRKYLQKQIKRGTGITAPVMSAQESCKRPDSSQAPASVLQSKMPPKRDGLQESLQSKSLAALFNAA  
QEVGERPRKPPLRHRNLPRSFTEPASSSSVTSTSGMSLKDLEGRNPDAAEFFELLGPDYSNMVSEQEVFHTPS  
PRIQQSGGPEPGVLDSSHVFTGGFLYAEPWGTNSVQAYKKTGTRTGAAQPALYGSTQPPGAPGAPCSLSLYSF  
SDYSGSQVSYDQTGGYGRTSFPPL PLRHRNLPRSFTEP

rs:XP\_026939436 [XP\_026939436] protein **FAM181B** [Lagenorhynchus obliquidens]. 221..235

MAVQAALLSTHPFVFPFGGGSPDGLGSAFGALDKGCCFEDEETGTPAGALLAGAEGGDVREATRDLLSF  
IDSASSNIKLALDKPGKSKRKVNHRKYLQKQIKRCSGLMGAAPPSPGAADTPAKRPLAAASAQTVPVQAHGK  
AAPREASQAAAAASLQSQSLAALFDSLHVPGAADPAGVAEAPAAAGLVGAGAGGVGGDAAGPAGGPAVPGARK  
VPLRARNLPPSFFTEPSRAGGGGGCGPSGPGVSLGDLEKGAEEAEFFEMLGPDYAGTEAGVLLAAEPLDVLTTG  
AAVLRGPPPELEPGLFEPFPAMGGSLLYPEPWSAPGGPTTKKSPLAAPRGGLTLNEPLRPLYPAAADSPGGDDGPG  
LLASFTPFSSDCALPPPPPPQVSYDYSAGYSRTAYASLWRPDIWEGAPGEEGAHRD PLRARNLPPSFFTEP

rs:XP\_010748515 [XP\_010748515] transcriptional coactivator YAP1 isoform X1 [Larimichthys crocea]. 46..60

MDAHRGAPPAGQQIVHVRGDSQTELEALFSAVMNPSKATRQPASLPMRMRKLPDSFFRQPDSTRGHSRQA  
SSDGGVCGSLTPHHVRAHSSPASLPVNSLSTQAADVAATPIIPDDVPLPHGWEMAKTPTGQRYFLNHLDKTTTWH  
DPRLSQLQSAASQHPISGAPVHAHSLSNPASTTQPQNINPDAGPLPEGWEQAVTADGEVYIIDHINKTTAWFDP  
LAQKMNPGILGLALQQRQEKERLRCKQQGLPPQITPQEAGGRNQMPGGMDHNRNTQTLVPSLDVIRIRAPNHEPTL  
NGAHSRNESTDSGLSVSSLPRTSDHMLSSVDHMDTGDTGETSSMTLQESMPVLPMSSEGEELMPSIPEGLSSDLLM  
DMETVLSGSHMDRDSLLTWL PMRMRKLPDSFFRQP

rs:XP\_010748523 [XP\_010748523] transcriptional coactivator YAP1 isoform X2 [Larimichthys crocea]. 46..60

MDAHRGAPPAGQQIVHVRGDSQTELEALFSAVMNPSKATRQPASLPMRMRKLPDSFFRQPDSTRGHSRQA  
SSDGGVCGSLTPHHVRAHSSPASLPVNSLSTQAADVAATPIIPDDVPLPHGWEMAKTPTGQRYFLNHLDKTTTWH  
DPRLSQLQSAASQHPISGAPVHAHSLSNPASTTQPQNINPDAAQKMNPGILGLALQQRQEKERLRCKQQGLPPQI  
TPQEAGGRNQMPGGMDHNRNTQTLVPSLDVIRIRAPNHEPTLNGAHSRNESTDSGLSVSSLPRTSDHMLSSVDHMD  
TGDTGETSSMTLQESMPVLPMSSEGEELMPSIPEGLSSDLLMDMETVLSGSHMDRDSLLTWL  
PMRMRKLPDSFFRQP

rs:XP\_010732225 [XP\_010732225] protein **FAM181A** [Larimichthys crocea].>tr:A0A0F8AUS3\_LARCR [A0A0F8AUS3] SubName: Full=Protein **FAM181A** {ECO:0000313|EMBL:KKF12131.1}; 104..118

MANADSEVKTLLNFVNLAASSDIKAAALDKSAPCRRSVDHRKYLQKQLKRFSQKYSRVPRCHTHRSAEYGC  
TKPMGTIHQSVKVAEKSSPDAQSVENVGCAVEQVPMRKRQLPASFWEEPCLTQTKREHHLGVKRNHAGTSEGSE  
NEKRKKSYYDDAKANLSASSRNTADKDSLKLDLTSHHCVSVCACCPFYHGHQVLHSHIVVPHPLGLWSKAAG  
SEIERPEHPYQKIHHTHVVKPIPTKPTVQSPIFSVFGFI PMRKRQLPASFWEEP

rs:XP\_010738019 [XP\_010738019] transcriptional coactivator YAP1 [Larimichthys crocea]. 45..59

MDPSQHNPAGHQIVHVRGDSETDLEALFNAVMPKNTIVPPSVPMRMRKLPDSFFKPPPEPKSHSRQAS  
TDAGSGGALTPHHVRAHSSPASLQLGAVSGGSLSGMPPAGASQHLRQSSYEIPDDMPLPPGWEMAKTASGQRYF  
LNHIDQTTTTWQDPRKALLQMNQAAPASSVPVQQNLMNPASGPLPDGWEQAITSEGEIYYINHKNKTTSWLDPR  
DPRFALNQQRITQSAPVKQGGPLPPSIHSAVVGNNQMRLLQIEKERLRLKQEQELLRQRPQELALRNQLPTSM  
DGSTNPVSSPMAQDARTMTANSSDPFLNSGTYHSRDESTDSGLSMSSYSVPRTPDFFLNSVDEMDTGDPQLQPSMA

TQPSRFPDYLDIAIPGTDVDLGTLESESMAVEGEELMPSLQEQALSSDILNDMESVLAATRDKESFLTWL  
PMRMRKLPDSFFKPP

rs:XP\_019128567 [XP\_019128567] protein **FAM181B** [Larimichthys crocea].  
155..169

MAVQAAIMNPQFMNFCFPGSVMEYDMEKSLDGSLLGEAENDEYKETTDRDLSFIDSASSNIKLALDKP  
VKSKRKVNHRKYLQKQIKRCTGIITPGNIAEAPVKRQGSPLAQPSPLQSKILPKRDGVQANLQSKSLAALFSPVK  
DIRGEKAKKPLRHRNLPPSFFTEPANCSKVSSTSGMTLKDRLERGNPEAAEFFELLGPDYSNMVSDQDLYQSMPL  
RVQQEMGGPDASYDSHHLVGGLLYSEPWTSCSGASKKLGGLSRGSPVQPPVYCPSSSEATGPIEDHALCTLAFPN  
FFTDCSIPQVTYDLSGGYNRANYSSL PLRHRNLPPSFFTEP

rs:XP\_007645663 [XP\_007645663] protein **FAM181A** [Cricetulus  
griseus].>rs:XP\_027275367 [XP\_027275367] protein **FAM181A** [Cricetulus  
griseus].>tr:G3HU80\_CRIGR [G3HU80] SubName: Full=**FAM181A**  
{ECO:0000313|EMBL:RLQ65388.1}; SubName: Full=Protein **FAM181A**  
{ECO:0000313|EMBL:EGW13383.1}; 129..143

MAADSDVKMLLNFNVLASSDIKAALDKSAPCRRSVDHRKYLQKQLKRFSQKYSRLPRGLPGRVTEPHLQ  
RGPEERPGQLPLHPCPESNPGGGGYKEKALGTPFREELSKESQSFQGLNPEAARPGQVPMRKRQLPASFWEEP  
PTLSYPMGLEVGLAPREASLYENKKNCKGLES LGPETAPAPLPMSPRVLADMEPLKMSGVSLVGSGLDAWSYCPFQ  
YHQQPIFPSLPGVLPQGPVPSLGLWRKSPASVELAHFCKDQVDSGPKVYRPVVLKPIPTKPAMPPPPIFNVFGYL  
PMRKRQLPASFWEEP

rs:XP\_027263749 [XP\_027263749] protein **FAM181B** [Cricetulus griseus].  
218..232

MAVQAALLSSHPFIPFGFGGSADGLVSAFGSLDKGCCFEDDESGAPAGALLSGSEGGDLREATRDLLSF  
IDSASSNIKLALDKPGKSKRKVNHRKYLQKQIKRCSGLMGTAPPGPSAADAPAKRPPGAPGAPTVAAPAHCK  
ATPRREATQAAAAASLQSRSLAALFDSLHHPGVAEPAGGAVAVPVPGLGAASAAGDGASTAGSSATPGAKKQVPL  
RARNLPPSFFTEPSRVGGSGGCGCPSSQGVSLGDLEKGAEAFFELLAPDFGAGNDSGVLAAEPLDAFPT  
GATVLRGPLELESGPFEPAMVGNPLYSEPWSAPSCPQTKKPLAGVRSVTLNEPVRLLYPTALDSPGGEDTPA  
LASFAPFFPDCALPPPQVSYDYSAGYSRAVYPSLWRPDGFWEWEGASGEDRAHTV PLRARNLPPSFFTEP

rs:XP\_027270966 [XP\_027270966] transcriptional coactivator YAP1 isoform  
X5 [Cricetulus griseus]. 72..86

MEPAQQPPPQPAPQGPVPPSAPAPPSGTPAAPPAPPAGHQVVHVRGDSETDLEALFNAVMMNPKTANVPQ  
TVPMLRRLKLPDSFFKPPPEPKSHSRQASTDAGTAGALTPOHVRAHSSPASLQLGAVSPGTLTPTVVSGPAATPAAQ  
HLRQSSFEIPDDVPLPAGWEMAKTSSGQRYFLNHIDQTTTWQDPRKAMLSQLNVPTPASTAVPQTLMNSASGPLP  
DGWEQAMTQDGDVYYINHKNTTSWLDPRLDPRFAMNQRITQSAPVKQPPPLAPQSPQGGVLGGGNSQQQQMQL  
QQLQMEKERLRLKQQLLRQVRPQAIRNINPSTANAPKCQELALRSQLPTLEQDGGTQNAVSSPGMSQELRTMTT  
NSSDPFLNSGTYHSRDESTDSGLSMSSYSVPRTPDDFLNSVDEMDTGDTINQSTLPSQQSRFPDYLEAIPGTNVD  
LGTLEGDAMNIEGEELMPSLQEQALSSDILNDMESVLAATKLDKESFLTWL PMRLRKLKLPDSFFKPP

rs:XP\_027270967 [XP\_027270967] transcriptional coactivator YAP1 isoform  
X6 [Cricetulus griseus]. 72..86

MEPAQQPPPQPAPQGPVPPSAPAPPSGTPAAPPAPPAGHQVVHVRGDSETDLEALFNAVMMNPKTANVPQ  
TVPMLRRLKLPDSFFKPPPEPKSHSRQASTDAGTAGALTPOHVRAHSSPASLQLGAVSPGTLTPTVVSGPAATPAAQ  
HLRQSSFEIPDDVPLPAGWEMAKTSSGQRYFLNHIDQTTTWQDPRKAMLSQLNVPTPASTAVPQTLMNSASGPLP  
DGWEQAMTQDGDVYYINHKNTTSWLDPRLDPRFAMNQRITQSAPVKQPPPLAPQSPQGGVLGGGNSQQQQMQL  
QQLQMEKERLRLKQQLLRQVRPQELALRSQLPTLEQDGGTQNAVSSPGMSQELRTMTTNSSD  
PFLNSGTYHSRDESTDSGLSMSSYSVPRTPDDFLNSVDEMDTGDTINQSTLPSQQSRFPDYLEAIPGTNVDLGLT  
EGDAMNIEGEELMPSLQEQALSSDILNDMESVLAATKLDKESFLTWL PMRLRKLKLPDSFFKPP

rs:XP\_027270968 [XP\_027270968] transcriptional coactivator YAP1 isoform  
X7 [Cricetulus griseus]. 72..86

MEPAQQPPPQPAPQGPVPPSAPAPPSGTPAAPPAPPAGHQVVHVRGDSETDLEALFNAVMMNPKTANVPQ  
TVPMLRRLKLPDSFFKPPPEPKSHSRQASTDAGTAGALTPOHVRAHSSPASLQLGAVSPGTLTPTVVSGPAATPAAQ  
HLRQSSFEIPDDVPLPAGWEMAKTSSGQRYFLNHIDQTTTWQDPRKAMLSQLNVPTPASTAVPQTLMNSASGPLP  
DGWEQAMTQDGDVYYINHKNTTSWLDPRLDPRFAMNQRITQSAPVKQPPPLAPQSPQGGVLGGGNSQQQQMQL  
QQLQMEKERLRLKQQLLRQVRPQELALRSQLPTLEQDGGTQNAVSSPGMSQELRTMTTNSSDPFLNSGTYHSR

ESTDSGLSMSSYSVPRTPDDFLNSVDEMDTGDTINQSTLPSQQSRFPDYLEAIPGTNVDLGTLEGDAMNIEGEEEL  
MPSLQREALSSDILNDMESVLAATKLDKESFLTWL PMRLRKLPSFFKPP

rs:XP\_027270969 [XP\_027270969] transcriptional coactivator YAP1 isoform  
X8 [*Cricetulus griseus*]. 72..86

MEPAQQPPPPQAPQGPVPPSAPAPPSGTPAAPPAPPAGHQVVHVVRGDSETDLEALFNAVMPKNTANVPQ  
TVPMLRKLPSFFKPPPEPKSHSRQASTDAGTAGALTPQHVRHSSPASLQLGAVSPGTLTPTVVSGPAATPAAQ  
HLRQSSFEIPDDVPLPAGWEMAKTSSGQRYFLNHIDQTTTWQDPRKAMLSQLNVPTPASTAVPQTLMNSASGPLP  
DGWEQAMTQDGDVYYINHKNKTTSWLDPRLDPRFAMNQIRITQSAPVKQPPPLAPQSPQGGVLLGGNSSQQQQMQL  
QQLQMEKERLRLKQQLLQELALRSQLPTLEQDGGTQNAVSSPGMSQELRTMTTNSDDPFLNSGTYHSRDESTD  
SGLSMSSYSVPRTPDDFLNSVDEMDTGDTINQSTLPSQQSRFPDYLEAIPGTNVDLGTLEGDAMNIEGEEELMPSL  
QREALSSDILNDMESVLAATKLDKESFLTWL PMRLRKLPSFFKPP

rs:XP\_001987073 [XP\_001987073] GH20170 [*Drosophila*  
grimshawi].>tr:B4J6D9\_DROGR [B4J6D9] SubName: Full=GH20170  
{ECO:0000313|EMBL:EDW01940.1}; 63..77

MSLNNKSNLSEKEIDDEDMLSPSPTKLSTNLVVRVNQDSDDNLQALFDSVLNPGDAKLPLQIPFRMRKL  
PNSFFNPPAPLHRSRANSADSTYDGSQTNINKTGVQSELOQQQQQPSLAQQSQPSHRSLAIHHFRARSSPASLQPN  
YNVTRTRNAESSASNNPSNQGQSGPAYPDNNVEFNSSPANVEDVLNTCMGGQDAPSLSTQTIHKKQRSYDVVSP  
IQLOSQLGALPPGWEQAKTNDGQIYYLNHTTKTTQWEDPRIQFRQQQQRAIVDRIKPNESGLSVLDCPDNLVSS  
LQIGDNICNNIFNDAQTIINPPSSHKPDLEWYKIN PFRMRKLPSFFNPP

rs:XP\_027322827 [XP\_027322827] protein **FAM181B** [*Anas platyrhynchos*].  
193..207

MAVPAALLSPHHLLSFCFPAGGLLGYADLEKGYEGGGGGGGGGGGGGGGEAGDFKEATRDLDSFIDSA  
SSNIKLALDKPVKSKRKNHRKYLQKQIKRCTGIIAAAAPPSSSSSSSSSSSPAAAACPAKQPPPPRREASTAA  
SSLQSKSLAALFGSLQPGRGSASGCGAAGGGGGSSGSAAGGPRKVPLRARNLPPSFFTEPALPPRGGPPASK  
ETEKGGAEEAEFFELLGPDYGALLPEHAAPQDAFPAARLPAELGLEHGLYEAPLPSLPAHHPLLGLLYPEPP  
WSPAGPCSPKKSPPPEALRPLYSGGAESGSETFGSFFPECPLAPPQVPYDYSTGYHRATYSGL  
PLRARNLPPSFFTEP

rs:XP\_027323768 [XP\_027323768] transcriptional coactivator YAP1 isoform  
X1 [*Anas platyrhynchos*]. 94..108

MDPGQPPAQQPQQQQPPAAAQPPASQQAPPQPPGAVVVAAAGGTPGGGAQPPGGGPPPAGHQIVHVVRGD  
SETDLEALFNAVMPKGANVPHTLPMRLRKLPSFFKPPPEPKAHSRQASTDAGTAGALTPQHVRHSSPASLQLG  
AVSPGTLTPSGVVTGPGAPSSQHLRQSSFEIPDDVPLPPGWEMAKTPSGQRYFLNHIDQTTTWQDPRKAMLSQMN  
VTAPTSPPVQQNLMSASGPLPDGWEQAMTQDGEIYYINHKNKTTSWLDPRLDPRFAMNQIRISQSAPVKQPPPLA  
PQSPQGGVMGGSSSNQQQQMRLQQLQMEKERLRLKHQELLRQVRPQALRNINPSTANSKPKHQELALRSQLPTMEQ  
DGGSNPNVSSPGMSQELRTMTTNSDDPFLNSGTYHSRDESTDSGLSMSSYSVPRTPDDFLNSVDEMDTGDSISQS  
NIPSHQNRFPDYLEAIPGTNVDLGTLEGDGMNIEGEEELMPSLQREALSSDILNDMESVLAATKLDKESFLTWL  
PMRLRKLPSFFKPP

rs:XP\_027323779 [XP\_027323779] transcriptional coactivator YAP1 isoform  
X2 [*Anas platyrhynchos*]. 94..108

MDPGQPPAQQPQQQQPPAAAQPPASQQAPPQPPGAVVVAAAGGTPGGGAQPPGGGPPPAGHQIVHVVRGD  
SETDLEALFNAVMPKGANVPHTLPMRLRKLPSFFKPPPEPKAHSRQASTDAGTAGALTPQHVRHSSPASLQLG  
AVSPGTLTPSGVVTGPGAPSSQHLRQSSFEIPDDVPLPPGWEMAKTPSGQRYFLNHIDQTTTWQDPRKAMLSQMN  
VTAPTSPPVQQNLMSASGPLPDGWEQAMTQDGEIYYINHKNKTTSWLDPRLDPRFAMNQIRISQSAPVKQPPPLA  
PQSPQGGVMGGSSSNQQQQMRLQQLQMEKERLRLKHQELLRQALRNINPSTANSKPKHQELALRSQLPTMEQDGG  
QNPVSSPGMSQELRTMTTNSDDPFLNSGTYHSRDESTDSGLSMSSYSVPRTPDDFLNSVDEMDTGDSISQSNIPS  
HQNRFPDYLEAIPGTNVDLGTLEGDGMNIEGEEELMPSLQREALSSDILNDMESVLAATKLDKESFLTWL  
PMRLRKLPSFFKPP

rs:XP\_027323790 [XP\_027323790] transcriptional coactivator YAP1 isoform  
X3 [*Anas platyrhynchos*]. 94..108

MDPGQPPAQQPQQQQPPAAAQPPASQQAPPQPPGAVVVAAAGGTPGGGAQPPGGGPPPAGHQIVHVVRGD  
SETDLEALFNAVMPKGANVPHTLPMRLRKLPSFFKPPPEPKAHSRQASTDAGTAGALTPQHVRHSSPASLQLG  
AVSPGTLTPSGVVTGPGAPSSQHLRQSSFEIPDDVPLPPGWEMAKTPSGQRYFLNHIDQTTTWQDPRKAMLSQMN  
VTAPTSPPVQQNLMSASGPLPDGWEQAMTQDGEIYYINHKNKTTSWLDPRLDPRFAMNQIRISQSAPVKQPPPLA

PQSPQGGVMGGSSSNQQQQMRLQQLQMEKERLRLKHQELLRQVRPQELALRSQLPTMEQDGGSQNPVSSPGMSQE  
LRTMTTNSDDPFLNSGTYHSRDESTDSGLSMSSYSVPRTPDDFLNSVDEMMDTGDSSISQSNIPSHQNRFPDYLEAI  
PGTNVDLGTLEGDGMNIEGEEELMPSLQEQALSSDILNDMESVLAATKLDKESFLTWL PMRLRKLPSDFFKPP

rs:XP\_027323792 [XP\_027323792] transcriptional coactivator YAP1 isoform  
X4 [Anas platyrhynchos]. 94..108

MDPGQPPAQPPQQQQPPAAAQPPASQQAPPQPPGAVVVAAAGGTPGGGAQPPGGGPPPAGHQIVHVVRGD  
SETDLEALFNAVMPKGANVPHTLPMRLRKLPSDFFKPPEPKAHSRQASTDAGTAGALTPQHVRHSSPASLQLG  
AVSPGTLTPSGVVTGPGAPSSQHLRQSSFEIPDDVPLPPGWEMAKTPSGQRYFLNHIDQTTTWQDPRKAMLSQMN  
VTAPTSPPVQQLMNSASGPLPDGWEQAMTQDGEIYYINHKNKTTSWLDPRLDPRFAMNQRIQSAPVKQPPPLA  
PQSPQGGVMGGSSSNQQQQMRLQQLQMEKERLRLKHQELLRQELALRSQLPTMEQDGGSQNPVSSPGMSQELRTM  
TTNSDDPFLNSGTYHSRDESTDSGLSMSSYSVPRTPDDFLNSVDEMMDTGDSSISQSNIPSHQNRFPDYLEAI  
PGTNVDLGTLEGDGMNIEGEEELMPSLQEQALSSDILNDMESVLAATKLDKESFLTWL PMRLRKLPSDFFKPP

rs:XP\_027323799 [XP\_027323799] transcriptional coactivator YAP1 isoform  
X5 [Anas platyrhynchos]. 94..108

MDPGQPPAQPPQQQQPPAAAQPPASQQAPPQPPGAVVVAAAGGTPGGGAQPPGGGPPPAGHQIVHVVRGD  
SETDLEALFNAVMPKGANVPHTLPMRLRKLPSDFFKPPEPKAHSRQASTDAGTAGALTPQHVRHSSPASLQLG  
AVSPGTLTPSGVVTGPGAPSSQHLRQSSFEIPDDVPLPPGWEMAKTPSGQRYFLNHIDQTTTWQDPRKAMLSQMN  
VTAPTSPPVQQLMNSASAMNQRIQSAPVKQPPPLAPQSPQGGVMGGSSSNQQQQMRLQQLQMEKERLRLKHQ  
LLRQALRNINPSTANSFKHQLALRSQLPTMEQDGGSQNPVSSPGMSQELRTMTTNSDDPFLNSGTYHSRDEST  
SGLSMSSYSVPRTPDDFLNSVDEMMDTGDSSISQSNIPSHQNRFPDYLEAI  
PGTNVDLGTLEGDGMNIEGEEELMPSLQEQALSSDILNDMESVLAATKLDKESFLTWL PMRLRKLPSDFFKPP

rs:XP\_027323806 [XP\_027323806] transcriptional coactivator YAP1 isoform  
X6 [Anas platyrhynchos]. 94..108

MDPGQPPAQPPQQQQPPAAAQPPASQQAPPQPPGAVVVAAAGGTPGGGAQPPGGGPPPAGHQIVHVVRGD  
SETDLEALFNAVMPKGANVPHTLPMRLRKLPSDFFKPPEPKAHSRQASTDAGTAGALTPQHVRHSSPASLQLG  
AVSPGTLTPSGVVTGPGAPSSQHLRQSSFEIPDDVPLPPGWEMAKTPSGQRYFLNHIDQTTTWQDPRKAMLSQMN  
VTAPTSPPVQQLMNSASAMNQRIQSAPVKQPPPLAPQSPQGGVMGGSSSNQQQQMRLQQLQMEKERLRLKHQ  
LLRQVRPQELALRSQLPTMEQDGGSQNPVSSPGMSQELRTMTTNSDDPFLNSGTYHSRDESTDSGLSMSSYSVPR  
TPDDFLNSVDEMMDTGDSSISQSNIPSHQNRFPDYLEAI  
PGTNVDLGTLEGDGMNIEGEEELMPSLQEQALSSDILNDMESVLAATKLDKESFLTWL PMRLRKLPSDFFKPP

rs:XP\_027323815 [XP\_027323815] transcriptional coactivator YAP1 isoform  
X7 [Anas platyrhynchos]. 94..108

MDPGQPPAQPPQQQQPPAAAQPPASQQAPPQPPGAVVVAAAGGTPGGGAQPPGGGPPPAGHQIVHVVRGD  
SETDLEALFNAVMPKGANVPHTLPMRLRKLPSDFFKPPEPKAHSRQASTDAGTAGALTPQHVRHSSPASLQLG  
AVSPGTLTPSGVVTGPGAPSSQHLRQSSFEIPDDVPLPPGWEMAKTPSGQRYFLNHIDQTTTWQDPRKAMLSQMN  
VTAPTSPPVQQLMNSASAMNQRIQSAPVKQPPPLAPQSPQGGVMGGSSSNQQQQMRLQQLQMEKERLRLKHQ  
LLRQELALRSQLPTMEQDGGSQNPVSSPGMSQELRTMTTNSDDPFLNSGTYHSRDESTDSGLSMSSYSVPRTPDD  
FLNSVDEMMDTGDSSISQSNIPSHQNRFPDYLEAI  
PGTNVDLGTLEGDGMNIEGEEELMPSLQEQALSSDILNDMESVLAATKLDKESFLTWL PMRLRKLPSDFFKPP

rs:XP\_027324833 [XP\_027324833] LOW QUALITY PROTEIN: splicing factor,  
arginine/serine-rich 19 [Anas platyrhynchos]. 268..282

MDSRDNPAATHPRAQGDVFCPLSHRWGVQPRCPTTTPHSTPLLPPWGQTLWGTGTGTPRGAATLTPL  
SLPRRVSPGPGPLLRPDMAAGVIRPLAGLRLPSFFPHGLLLPARPEPDFDLSEEEEEDEEEEEDEEEAAED  
STSCRGLELAGPNAEATLRLRLRFSELISGDIQRYFGRRGQEEPAGGRGTPEDCSSPRCTAREPGTASLPQPEAV  
MARGGLWGXTQRLGPLAELFEYGVHRCLPPRAAGGKTQRLERKYGHITPMHRRKLPPSFWKEPGPGAGLLHTGX  
PDFSDLLANWTVEPGPELPGAGRELLPEAGRLGLDAEPFVGL PMHRRKLPPSFWKEP

rs:XP\_027428708 [XP\_027428708] protein **FAM181A** isoform X1 [Zalophus  
californianus]. 232..246

MGVCYCLSSKGMMLPASMARRAACDQTQSAQEAEPDARISLATPGLAQVCSGEPARPRRRRRRRGARG  
RPAPSVSSVFPFGAASHQSPRSSWKAPCSGPLVMASDSDVKMLLNFNVLASSDIKAALDKSAPCRRSVDHRKYL  
QKQLKRFSSQKYSRLPRGLPGRGAEPHLKRGPEDPGRLPLDSGQDSSPSGGGCYKEKALGNPYGEECLSREQTLQ  
RQNPEAARPGQVPMKRQLPASFWEEPRPHSYPLGLEGLGPREGPPYEGKKHCKGLEPLDPETAPVPASPRAL

AEKEPLKMSGVSLVGRVNAWSCCPFYHGQPIYAGHPGVLPQSPVPSLGLWRKSPASPGELAHFCKDVDGPGQKV  
YRPVVLKPIPTKPAVPPPIFNVFGYL PMRKRQLPASFWEEP

rs:XP\_027428709 [XP\_027428709] protein **FAM181A** isoform X2 [Zalophus californianus]. 211..225

MKEPLCPALMELTQPDARISLATPGLAQVCSGEPARPRRRRRRRGARGRPAPSVSSVFPFGAASHQQSP  
RSSWKAPCSGPLVMASDSDVKMLLNFNVLASSDIKAALDKSAPCRRSVDHRKYLQKQLKRFSQKYSRLPRGLPGR  
GAEPHLKRGPEDEGPRLLPDSGQDSSPSGGGCKYKALGNPYGEECLSREQTQRQNPAAARPGQVPMRKRQLPA  
SFWEPRPHTHSYPLGLEGGLPREGPPYEGKKHCKGLEPLDPETAPVPASPRALAEKEPLKMSGVSLVGRVNAWS  
CCPFYHGQPIYAGHPGVLPQSPVPSLGLWRKSPASPGELAHFCKDVDGPGQKVYRPVVLKPIPTKPAVPPPIFNV  
FGYL PMRKRQLPASFWEEP

rs:XP\_027434080 [XP\_027434080] transcriptional coactivator YAP1 isoform X1 [Zalophus californianus]. 89..103

MDPGPPPQPPQPPAAAQGGPPAAPPSPGQGPAPAGPPAPPQSQAAPQAPPAGHQIVHVRGDSETDL  
EALFNAVMPKNTANVPQTVPMRLRKLKLPDSFFKPPPEKSHSRQASTDAGTAGALTPQHVRHSSPASLQLGAVSPG  
SLTPTGVVSGPAAAPTAQHLRQSSFEIPDDVPLPAGWEMAKTSSGQRYFLNHIDQTTTWQDPRKAMLSQMSVTAP  
TSPPVQQSLMTSASGPLPDGWEQAVTQDGEIYYINHKNKTTSWLDPRLDPRFAMNQRVSQSAPVKQPPPLAPQSP  
PGGVLGSGGSSQQQOMRLQQLQMEKERLRLKQOELLRQVRPQAMRNINPSTANSKQELALRSQLPTLEQDGGT  
PNPVPSPGMSQELRTMTTSGSDPFLNSGTYHSRDESTDSGLSMSSYSVPRTPDDFLNSVDEMDTGDTINQSTLPS  
QQNRFPDYLEAIPGTNVDLGTLEGDMNIEGEEELMPSLQEQALSSDILNDMESVLAATKLDKESFLTWL  
PMRLRKLKLPDSFFKPP

rs:XP\_027434081 [XP\_027434081] transcriptional coactivator YAP1 isoform X2 [Zalophus californianus]. 89..103

MDPGPPPQPPQPPAAAQGGPPAAPPSPGQGPAPAGPPAPPQSQAAPQAPPAGHQIVHVRGDSETDL  
EALFNAVMPKNTANVPQTVPMRLRKLKLPDSFFKPPPEKSHSRQASTDAGTAGALTPQHVRHSSPASLQLGAVSPG  
SLTPTGVVSGPAAAPTAQHLRQSSFEIPDDVPLPAGWEMAKTSSGQRYFLNHIDQTTTWQDPRKAMLSQMSVTAP  
TSPPVQQSLMTSASGPLPDGWEQAVTQDGEIYYINHKNKTTSWLDPRLDPRFAMNQRVSQSAPVKQPPPLAPQSP  
PGGVLGSGGSSQQQOMRLQQLQMEKERLRLKQOELLRQAMRNINPSTANSKQELALRSQLPTLEQDGGT  
PNPVPSPGMSQELRTMTTSGSDPFLNSGTYHSRDESTDSGLSMSSYSVPRTPDDFLNSVDEMDTGDTINQSTLPS  
QQNRFPDYLEAIPGTNVDLGTLEGDMNIEGEEELMPSLQEQALSSDILNDMESVLAATKLDKESFLTWL  
PMRLRKLKLPDSFFKPP

rs:XP\_027434082 [XP\_027434082] transcriptional coactivator YAP1 isoform X3 [Zalophus californianus]. 89..103

MDPGPPPQPPQPPAAAQGGPPAAPPSPGQGPAPAGPPAPPQSQAAPQAPPAGHQIVHVRGDSETDL  
EALFNAVMPKNTANVPQTVPMRLRKLKLPDSFFKPPPEKSHSRQASTDAGTAGALTPQHVRHSSPASLQLGAVSPG  
SLTPTGVVSGPAAAPTAQHLRQSSFEIPDDVPLPAGWEMAKTSSGQRYFLNHIDQTTTWQDPRKAMLSQMSVTAP  
TSPPVQQSLMTSASGPLPDGWEQAVTQDGEIYYINHKNKTTSWLDPRLDPRFAMNQRVSQSAPVKQPPPLAPQSP  
PGGVLGSGGSSQQQOMRLQQLQMEKERLRLKQOELLRQELALRSQLPTLEQDGGT  
PNPVPSPGMSQELRTMTTSGSDPFLNSGTYHSRDESTDSGLSMSSYSVPRTPDDFLNSVDEMDTGDTINQSTLPS  
QQNRFPDYLEAIPGTNVDLGTLEGDMNIEGEEELMPSLQEQALSSDILNDMESVLAATKLDKESFLTWL  
PMRLRKLKLPDSFFKPP

rs:XP\_027434083 [XP\_027434083] transcriptional coactivator YAP1 isoform X4 [Zalophus californianus]. 89..103

MDPGPPPQPPQPPAAAQGGPPAAPPSPGQGPAPAGPPAPPQSQAAPQAPPAGHQIVHVRGDSETDL  
EALFNAVMPKNTANVPQTVPMRLRKLKLPDSFFKPPPEKSHSRQASTDAGTAGALTPQHVRHSSPASLQLGAVSPG  
SLTPTGVVSGPAAAPTAQHLRQSSFEIPDDVPLPAGWEMAKTSSGQRYFLNHIDQTTTWQDPRKAMLSQMSVTAP  
TSPPVQQSLMTSASAMNQRVSQSAPVKQPPPLAPQSPPGGVLGSGGSSQQQOMRLQQLQMEKERLRLKQOELLRQ  
VRPQAMRNINPSTANSKQELALRSQLPTLEQDGGT  
PNPVPSPGMSQELRTMTTSGSDPFLNSGTYHSRDESTDSGLSMSSYSVPRTPDDFLNSVDEMDTGDTINQSTLPS  
QQNRFPDYLEAIPGTNVDLGTLEGDMNIEGEEELMPSLQEQALSSDILNDMESVLAATKLDKESFLTWL  
PMRLRKLKLPDSFFKPP

rs:XP\_027434084 [XP\_027434084] transcriptional coactivator YAP1 isoform X5 [Zalophus californianus]. 89..103

MDPGPPPQPPQPPAAAQGGPPAAPPSPGQGPAPAGPPAPPQSQAAPQAPPAGHQIVHVRGDSETDL  
EALFNAVMPKNTANVPQTVPMRLRKLKLPDSFFKPPPEKSHSRQASTDAGTAGALTPQHVRHSSPASLQLGAVSPG  
SLTPTGVVSGPAAAPTAQHLRQSSFEIPDDVPLPAGWEMAKTSSGQRYFLNHIDQTTTWQDPRKAMLSQMSVTAP

TSPPVQQLMSTASAMNQRVSQSAPVKQPPPLAPQSPPGGVLGSGGSSQQQQMRLQQLQMEKERLRLKQQEELLRQ  
AMRNINPSTANSKPKCQELALRSQLPTLEQDGGTNPVPSPGMSQELRTMTTSGSDPFLNSGTYHSRDESTDSGLS  
MSSYSVPRTPDDFLNSVDEMGTGDTINQSTLPSQQNRFPDYLEAIPGTNVDLGTLEGDGMNIEGEEELMPSLQEQAL  
SSDILNDMESVLAATKLDKESFLTWL PMRLRKLKLPDSFFKPP

rs:XP\_027434085 [XP\_027434085] transcriptional coactivator YAP1 isoform  
X6 [Zalophus californianus]. 89..103

MDPGPPPQPPQPPAAAQGGQPPAAPPSPGQGPAPAPGPPAPPQSQAAPQAPPAGHQIVHVRGDSETDL  
EALFNAVMPKNTANVPQTVPMRLRKLKLPDSFFKPPPEPKSHSRQASTDAGTAGALTPQHVRHSSPASLQLGAVSPG  
SLTPTGVVSGPAAAPTAQHLRQSSFEIPDDVPLPAGWEMAKTSSGQRYFLNHIDQTTTWDPRKAMLSQMSVTAP  
TSPPVQQLMSTASAMNQRVSQSAPVKQPPPLAPQSPPGGVLGSGGSSQQQQMRLQQLQMEKERLRLKQQEELLRQ  
ELALRSQLPTLEQDGGTNPVPSPGMSQELRTMTTSGSDPFLNSGTYHSRDESTDSGLSMSSYSVPRTPDDFLNS  
VDEMGTGDTINQSTLPSQQNRFPDYLEAIPGTNVDLGTLEGDGMNIEGEEELMPSLQEQALSSDILNDMESVLAATK  
LDKESFLTWL PMRLRKLKLPDSFFKPP

rs:XP\_027436606 [XP\_027436606] protein **FAM181B** [Zalophus californianus].  
221..235

MAVQAALLSTHPFVVFVGGSPDGLGGAFGALDKGCCFEDDETGTTPAGALLAGAEGGDVREATRDLLSF  
IDSASSNIKALDKPGKSKRKNVHRKYLQKQIKRCSGLMGAAPPSPGAPDAPAKRSLAGPGAQNVAVPLHGK  
AAPRREASQAAAAASLQSRSLAALFDSLHRVPGGDERAGGSVAAPVAGLGGAGAGGSGGDAAGPAGGTAVPGARK  
VPLRARNLPPSFFTEPSRAGGGGCGSPGPGVSLGDLEKGAEEVEFFELLGPDYAGTEASVLLAAEPLDVFTGA  
AVLRGPPPELEPGLFEQPPAMVGSLLYSESWAPGCPPTKKPPLAAPRGGLTLNEPLRPLYPSAADSPPGGEDAPGL  
LASFAPFFSDCALPTPPPHQVSYDYSAGYSRTAYSSLWRPDGVWEGAPGEEGAHRD PLRARNLPPSFFTEP

rs:XP\_027529683 [XP\_027529683] protein **FAM181A** [Neopelma chrysocephalum].  
127..141

MASDSEVKTLNLFVNLASSDIKAALDKSAPCRRSVDHRKYLQKQLKRFSQKYSRMPRCHPSKPPPECGWR  
RGAEDRGRGPQPEAPDPSPHGGAAAQKVMQTAEAEESLTGERVLQEQKPEAVRPDQVPMRKRQLPASFWEEP  
QSLTARTFPASPEGLPAPRDLPPYEGKSKWSPDAASPSPDPAPHAGEKDPAGVLSGRVGAWTCCPFPCPGTG  
VYQPPGALPPSPFPGLGLWRKSAATLPAEVPHFCKEVDGTGQKLCRPMVLKPIPTKPAIPPIIFNVFGYL  
PMRKRQLPASFWEEP

rs:XP\_001627495 [XP\_001627495] predicted protein [Nematostella  
vectensis].>tr:A7SLN5\_NEMVE [A7SLN5] SubName: Full=Predicted protein  
{ECO:0000313|EMBL:EDO35395.1}; 44..58

MERKNSNVVHVRSDSGKELDALFHVIQSASAAVEQQPSSSSSLPMKLRKLPPSFFKQOPTILDPSKLAPD  
DSSGLTISHSRANSSPASLSVPTSSAGPPNYSLHPAHSRTQSYGGSAYEESNQLPPGWEMRTSPTGQPYFMNHYE  
QITTTWDPRKSQSTSNLNNNSLDPDGWEQAITPEGEVYFINHITRTTTSWIDPRNIAIAHRRTSSQOSTFSGAAQQ  
QDHRQKAMLERLQLEKEKLLKRRQQQLLEQEILLKHGMLEEGGSKSLGNLAREAAALQMPSEQNTTSVHMRDESF  
DSGLGMSSTGGYGYNTDVLNNGGGSDSQMFDANYNSKELTSRSEGRTGSGRLPEFFDNIPGTNVDFGTIEGENT  
PTNMETDDDLGVGLDLNTDILNDVESVLTNMSKIPDPNFLTWL PMKLRKLPPSFFKQP

rs:XP\_001636222 [XP\_001636222] predicted protein [Nematostella  
vectensis].>tr:A7RWP5\_NEMVE [A7RWP5] SubName: Full=Predicted protein  
{ECO:0000313|EMBL:EDO44159.1}; 86..100

MASGSANSPPQFFVGGANGNMIREAVQSGCCRPQSQSADGYCLFTFFFEENPRVAVERHFEEALKHFFSTER  
AMEANQTKNVTDRLLPMKQRNLPASFWCPEPETAIDAIQLNKVHHGHTTFTGMVPYTVNQVMTTGRPRTTTRPVQRQ  
DLPDSDPAPLLVSCRRLPVTSTDVIGTIAHAQSKQQARYMTIVHGPRPGDGFNPRYNLLVQPNVVFVELPRVHGE  
PRSKSG PMKQRNLPASFWCPP

rs:XP\_027585196 [XP\_027585196] protein **FAM181A** [Pipra filicauda].  
127..141

MASDSEVKTLNLFVNLASSDIKAALDKSAPCRRSVDHRKYLQKQLKRFSQKYSRMPRCHPSKPPPECGWR  
RGAEDRGRGPQPEAPDPSPHGGAAAQKVMQTAEAEESLTGERVLQEQKPEAVRPDQVPMRKRQLPASFWEEP  
QSLTARAFPASPEGLPAPRDLPPYEGKSKWSPDAASPSPDPAPHAGEKDPAGVLSGRVGAWTCCPFPCPGTG  
VYQPPGALPPSPFPGLGLWRKSAATLPAEVPHFCKEADGTGQKLYRPMVLKPIPTKPAIPPIIFNVFGYL  
PMRKRQLPASFWEEP

rs:XP\_027606701 [XP\_027606701] sentrin-specific protease 3 isoform X1 [Pipra filicauda]. 171..185

MAGRQRQGVIQPLAELRLPSFPFHSLLLPTHPEPDFHNLSEEEEEEEEEEEEEEEEEVEAAEENMRPEPAI  
SSTAETTLRLLLKFSELISCDIQRYFGRRGREEAAGTQVPVKDCESPRSAGAQPEAPRGSPGAVHRLGPLAELFEY  
GVHRCLSPRAAGGRTQRLERKYGHITPMHRRKLPPSFWKEPGPTSLHTGTPDFSDLLANWTVEPGPELPCAGRE  
LPLEPGRPGLEAEFPFGL PMHRRKLPPSFWKEP

rs:XP\_027606702 [XP\_027606702] sentrin-specific protease 3 isoform X2 [Pipra filicauda]. 167..181

MAAGVIQPLAELRLPSFPFHSLLLPTHPEPDFHNLSEEEEEEEEEEEEEEEEEVEAAEENMRPEPAISSTA  
ETTLRLLLKFSELISCDIQRYFGRRGREEAAGTQVPVKDCESPRSAGAQPEAPRGSPGAVHRLGPLAELFEYGVHR  
CLSPRAAGGRTQRLERKYGHITPMHRRKLPPSFWKEPGPTSLHTGTPDFSDLLANWTVEPGPELPCAGRELPLE  
PGRPGLEAEFPFGL PMHRRKLPPSFWKEP

rs:XP\_027568317 [XP\_027568317] protein **FAM181B** [Pipra filicauda]. 166..180

MAAPAALLSPHLLSFCFPAAGGLLYADLEKGYEGGGDAGDFREATRDLLSFIDSASSNIKLALDRP  
VKSRRKVNHRKYLQKQIKRCTGIIAAAAPPASCPPAACSTRPPPRREPAQAAGSSLQSKSLAALFGSLQRGRGA  
AGGAEAKAGGGEKAAGGPRKVLDRNLPSFFTEPALPAPAARGPPAKEPEKGGGAAEASEFFELLCPYEGAL  
LPEHAAPPDAFGRLPAELGLEHGLYELPLPAGPHLLGGLLYPEPPWSPAAPCSPPRKAPPEPLRPLYAGGPEP  
VPGGGGGSTEEPGGHLPAGFAFFFPECPLAPPQPPYDYGAGYHRAGYPGL PLRDRNLPSFFTEP

rs:XP\_027746068 [XP\_027746068] protein **FAM181A** [Empidonax traillii]. 127..141

MASDSEVKLLNFVNLAASSDIKAALDKSAPCRRSVDHRKYLQKQLKRFSQKYSRMPRCHPSKPSSECGWR  
RGAEDRGRGPQPEAPDSNPHGGAAEKVMQTI EAESLTGERVLQEQKPAIRPDQVPMRKRQLPASFWEEP  
QSLTTRAFPASPEGLPAPRDPPEYEGKSKRSPDAADPENPPDPAPHAGEKDPAGVLSGRMGAWTCCPFPCPGTG  
VYQPPGALPPSPFGLGLWRKSAATLPAEVPHFCKEADGTGQKLYRPMVLKPIPTKPAIPPIFNVFGYL  
PMRKRQLPASFWEEP

rs:XP\_027763749 [XP\_027763749] transcriptional coactivator YAP1-like [Empidonax traillii]. 86..100

MDPGQPQAQQPSQAAQPPAPQQQQPPQPPGAVSGAAAGAAQPPGGGPPAGHQIVHVRGDSETDLEAL  
FNAVMPKGANVPHTLPMRLRKLKLPDSFFKPPPEPKAHSRQASTDAGTAGALTPQHVRHSSPASLQLGAVSPGTLT  
PSGVVTGPGAPSSQHLRQSSFEIPDDVPLPPGWEMAKTPSGQRYFLKFCFLKTNKNIQDERLLDSYPFAFLL  
LCAEDGKELWVS PMRLRKLKLPDSFFKPP

rs:XP\_027718445 [XP\_027718445] uncharacterized protein LOC114043588 [Vombatus ursinus].>rs:XP\_027718446 [XP\_027718446] uncharacterized protein LOC114043588 [Vombatus ursinus].>rs:XP\_027718447 [XP\_027718447] uncharacterized protein LOC114043588 [Vombatus ursinus]. 215..229

MAAGVIRNLCDFRLQTPFHQPFLPSTGPRDPDFPETSDEEEEEEDGEQEEDGKQMEDLELAGCSPGFQR  
SDQELGKGSTSPSSSTEMTLQLLRFSELISCDIQRYFGQKTKDDDDPACNIYEDSRPPGKSARELYYADLMQIV  
QSGDQEDEDPDIVGLPRGFDCQTRFISSRDRSQKLGPLVELFEYGLCQYARQVSDSRRLRLEKKYGHITPMHKL  
KLPQSFWKEPAPSSLCLLNTSTPDFSDLLANWTSVAQELHVSVGGRELGRHALEMHDHLEEA  
PMHRRKLKLPQSFWKEP

rs:XP\_027725682 [XP\_027725682] protein **FAM181A** [Vombatus ursinus]. 118..132

MASDSEVKMLLNFNLAASSDIKAALDKSAPCRRSVDHRKYLQKQLKRFSQKYSRLPRCYPSPRSGESHSK  
RGPEDGRCRTPSNGSTEKGGNPGMEENFPEEQTLQEQIPEACRPDQVPMRKRQLPASFWEEP  
LSVHREVPAYEGKSKKRPELTLGSETAPVPASPRAEKESPKVPSASLMGRMSAWSCCFQYHQPIYQSPGGLPQ  
SPVPGGLGLWRKSPSSPGEMGHFCKEPGSPSQKVYRPVVLKPIPTKPGVPPPIFNVFSYI  
PMRKRQLPASFWEEP

rs:XP\_027704080 [XP\_027704080] protein **FAM181B** [Vombatus ursinus]. 243..257

MAVQAAILSPHHFIPFCFPGSPGALGMDFGDLKGCCEDEETGGTGVALLEGEAVAAEAGGGGGGGDF  
REATRDLLSFIDSASSNIKLALDKPVKSKRKNHRKYLQKQIKRCTGMMTSSSASASGPAPSVSPSPGSAAVPA

GAPEVPPKRLPAASPTTPGPQGKAPPKREGSQAAASLQSKSLAALFESLHQVRGNGGEGKGGAGTLATVAGGGGGG  
GGVGAEGGGSVVAAAGAGGGKVVPLRNRNLPPSFFTEPSRAGGCGPSGGGVTLRELEKGEAVEFFELLSPDYCT  
GGEVGGLLPSEPLDLFPAAVRAPQELEHIVYDPHPTVVAGLLYSEPWSTQCPPAKKVPVASNRRGGGLTLNETLR  
ALYPGTSDSAASSLGSPPGEDTAGHLTPFSQFFPDCALPTPPPPHQMPYDYGVGYSRVAYSGL  
PLRNRNLPPSFFTEP

rs:XP\_027705314 [XP\_027705314] transcriptional coactivator YAP1 isoform  
X1 [Vombatus ursinus]. 89..103

MDPGQQPPQAPSQGGQAPSQPPQGGQGGPPTGPGQQAPPGAPGSQAAPPPPPAGHQIVHVRGDSETDL  
EALFNAVMPKNTANVPQTVPMRLRKLKLPDSFFKPEPKSHSRQASTDAGTAGALTPQHVRHSSPASLQLGAVSPG  
TLSPSGVVSGPGTAPTQHLRQSSFEIPDDVPLPAGWEMAKTSSGQRYFLNHIDQTTTWQDPRKAMLSQMNVTAP  
TSPPVQQNIMNSASGPLPDGWEQAMTQDGEIYYINHKNKTTSWLDPRLDPRFGKAMNQRISQSAPVKQPPPLAPQ  
SPQGGVMGGGSSNQQQMRLQQLQMEKERLRLKHQELLRQVRPQALRNVPSTANSFKRQEIALLRSQLPTEQDGT  
GTQNPVSSPGMNQELRMTTNSDPFLNSGTYHSRDESTDSGLSMSSYSVPRTPDFFLNSVDEMDTGDSISQSNIP  
PSQQNRFPDYLEAIPGTNVDLGTLEGDGMNIEGEEMLPSLQEALSSDILNDMESVLAATKLDKESFLTWL  
PMRLRKLKLPDSFFKPP

rs:XP\_027705316 [XP\_027705316] transcriptional coactivator YAP1 isoform  
X2 [Vombatus ursinus]. 89..103

MDPGQQPPQAPSQGGQAPSQPPQGGQGGPPTGPGQQAPPGAPGSQAAPPPPPAGHQIVHVRGDSETDL  
EALFNAVMPKNTANVPQTVPMRLRKLKLPDSFFKPEPKSHSRQASTDAGTAGALTPQHVRHSSPASLQLGAVSPG  
TLSPSGVVSGPGTAPTQHLRQSSFEIPDDVPLPAGWEMAKTSSGQRYFLNHIDQTTTWQDPRKAMLSQMNVTAP  
TSPPVQQNIMNSASGPLPDGWEQAMTQDGEIYYINHKNKTTSWLDPRLDPRFAMNQRISQSAPVKQPPPLAPQSP  
QGGVMGGGSSNQQQMRLQQLQMEKERLRLKHQELLRQVRPQALRNVPSTANSFKRQEIALLRSQLPTEQDGGT  
QNPVSSPGMNQELRMTTNSDPFLNSGTYHSRDESTDSGLSMSSYSVPRTPDFFLNSVDEMDTGDSISQSNIP  
PSQQNRFPDYLEAIPGTNVDLGTLEGDGMNIEGEEMLPSLQEALSSDILNDMESVLAATKLDKESFLTWL  
PMRLRKLKLPDSFFKPP

rs:XP\_027705317 [XP\_027705317] transcriptional coactivator YAP1 isoform  
X3 [Vombatus ursinus]. 89..103

MDPGQQPPQAPSQGGQAPSQPPQGGQGGPPTGPGQQAPPGAPGSQAAPPPPPAGHQIVHVRGDSETDL  
EALFNAVMPKNTANVPQTVPMRLRKLKLPDSFFKPEPKSHSRQASTDAGTAGALTPQHVRHSSPASLQLGAVSPG  
TLSPSGVVSGPGTAPTQHLRQSSFEIPDDVPLPAGWEMAKTSSGQRYFLNHIDQTTTWQDPRKAMLSQMNVTAP  
TSPPVQQNIMNSASGPLPDGWEQAMTQDGEIYYINHKNKTTSWLDPRLDPRFGKAMNQRISQSAPVKQPPPLAPQ  
SPQGGVMGGGSSNQQQMRLQQLQMEKERLRLKHQELLRQALRNVPSTANSFKRQEIALLRSQLPTEQDGGTQNP  
VSSPGMNQELRMTTNSDPFLNSGTYHSRDESTDSGLSMSSYSVPRTPDFFLNSVDEMDTGDSISQSNIP  
PSQQNRFPDYLEAIPGTNVDLGTLEGDGMNIEGEEMLPSLQEALSSDILNDMESVLAATKLDKESFLTWL  
PMRLRKLKLPDSFFKPP

rs:XP\_027705318 [XP\_027705318] transcriptional coactivator YAP1 isoform  
X4 [Vombatus ursinus]. 89..103

MDPGQQPPQAPSQGGQAPSQPPQGGQGGPPTGPGQQAPPGAPGSQAAPPPPPAGHQIVHVRGDSETDL  
EALFNAVMPKNTANVPQTVPMRLRKLKLPDSFFKPEPKSHSRQASTDAGTAGALTPQHVRHSSPASLQLGAVSPG  
TLSPSGVVSGPGTAPTQHLRQSSFEIPDDVPLPAGWEMAKTSSGQRYFLNHIDQTTTWQDPRKAMLSQMNVTAP  
TSPPVQQNIMNSASGPLPDGWEQAMTQDGEIYYINHKNKTTSWLDPRLDPRFAMNQRISQSAPVKQPPPLAPQSP  
QGGVMGGGSSNQQQMRLQQLQMEKERLRLKHQELLRQALRNVPSTANSFKRQEIALLRSQLPTEQDGGTQNPV  
SSPGMNQELRMTTNSDPFLNSGTYHSRDESTDSGLSMSSYSVPRTPDFFLNSVDEMDTGDSISQSNIP  
PSQQNRFPDYLEAIPGTNVDLGTLEGDGMNIEGEEMLPSLQEALSSDILNDMESVLAATKLDKESFLTWL  
PMRLRKLKLPDSFFKPP

rs:XP\_027705319 [XP\_027705319] transcriptional coactivator YAP1 isoform  
X5 [Vombatus ursinus]. 89..103

MDPGQQPPQAPSQGGQAPSQPPQGGQGGPPTGPGQQAPPGAPGSQAAPPPPPAGHQIVHVRGDSETDL  
EALFNAVMPKNTANVPQTVPMRLRKLKLPDSFFKPEPKSHSRQASTDAGTAGALTPQHVRHSSPASLQLGAVSPG  
TLSPSGVVSGPGTAPTQHLRQSSFEIPDDVPLPAGWEMAKTSSGQRYFLNHIDQTTTWQDPRKAMLSQMNVTAP  
TSPPVQQNIMNSASGPLPDGWEQAMTQDGEIYYINHKNKTTSWLDPRLDPRFGKAMNQRISQSAPVKQPPPLAPQ  
SPQGGVMGGGSSNQQQMRLQQLQMEKERLRLKHQELLRQVRPQEIALLRSQLPTEQDGGTQNPVSSPGMNQELR  
TMTTNSDPFLNSGTYHSRDESTDSGLSMSSYSVPRTPDFFLNSVDEMDTGDSISQSNIP  
PSQQNRFPDYLEAIPGTNVDLGTLEGDGMNIEGEEMLPSLQEALSSDILNDMESVLAATKLDKESFLTWL  
PMRLRKLKLPDSFFKPP



rs:XP\_027705320 [XP\_027705320] transcriptional coactivator YAP1 isoform X6 [Vombatus ursinus]. 89..103

MDPGQQPPQAPSQGGQAPSQPPQGGQGGPPTGPGQQAPPGAPGSQAAPPPPPAGHQIVHVRGDSETDL  
EALFNAVMPKNTANVPQTVPMRLRKLKLPDSFFKPPPEPKSHSRQASTDAGTAGALTPQHVRHSSPASLQLGAVSPG  
TLSPSGVVSGPGTAPTQHLRQSSFEIPDDVPLPAGWEMAKTSSGQRYFLNHIDQTTTWQDPRKAMLSQMNV TAP  
TSPPVQQNIMNSASGPLPDGWEQAMTQDGEIYYINHKNKTTSWLDPRLDPRFAMNQRIQSAPVKQPPPLAPQSP  
QGGVMGGGSSNQQQMRLQQLQMEKERLRLKHQELLRQVRPQEI ALRSQLPTMEQDGGTQNPVSSPGMNQELRTM  
TTNSSDPFLNSGTYHSRDESTDSGLSMSSYSVPRTPD DFLNSVDEMMDTGDSISQSNIP SQQRFPDYLEAIPGTN  
VDLGTLEGDGMNIEGEEELMPSLQEQALSSDILNDMESVLAATKLDKESFLTWL PMRLRKLKLPDSFFKPP

rs:XP\_027705321 [XP\_027705321] transcriptional coactivator YAP1 isoform X7 [Vombatus ursinus]. 89..103

MDPGQQPPQAPSQGGQAPSQPPQGGQGGPPTGPGQQAPPGAPGSQAAPPPPPAGHQIVHVRGDSETDL  
EALFNAVMPKNTANVPQTVPMRLRKLKLPDSFFKPPPEPKSHSRQASTDAGTAGALTPQHVRHSSPASLQLGAVSPG  
TLSPSGVVSGPGTAPTQHLRQSSFEIPDDVPLPAGWEMAKTSSGQRYFLNHIDQTTTWQDPRKAMLSQMNV TAP  
TSPPVQQNIMNSASGPLPDGWEQAMTQDGEIYYINHKNKTTSWLDPRLDPRFGKAMNQRIQSAPVKQPPPLAPQ  
SPQGGVMGGGSSNQQQMRLQQLQMEKERLRLKHQELLRQEI ALRSQLPTMEQDGGTQNPVSSPGMNQELRTMTT  
NSSDPFLNSGTYHSRDESTDSGLSMSSYSVPRTPD DFLNSVDEMMDTGDSISQSNIP SQQRFPDYLEAIPGTNVD  
LGTLEGDGMNIEGEEELMPSLQEQALSSDILNDMESVLAATKLDKESFLTWL PMRLRKLKLPDSFFKPP

rs:XP\_027705322 [XP\_027705322] transcriptional coactivator YAP1 isoform X8 [Vombatus ursinus]. 89..103

MDPGQQPPQAPSQGGQAPSQPPQGGQGGPPTGPGQQAPPGAPGSQAAPPPPPAGHQIVHVRGDSETDL  
EALFNAVMPKNTANVPQTVPMRLRKLKLPDSFFKPPPEPKSHSRQASTDAGTAGALTPQHVRHSSPASLQLGAVSPG  
TLSPSGVVSGPGTAPTQHLRQSSFEIPDDVPLPAGWEMAKTSSGQRYFLNHIDQTTTWQDPRKAMLSQMNV TAP  
TSPPVQQNIMNSASGPLPDGWEQAMTQDGEIYYINHKNKTTSWLDPRLDPRFAMNQRIQSAPVKQPPPLAPQSP  
QGGVMGGGSSNQQQMRLQQLQMEKERLRLKHQELLRQEI ALRSQLPTMEQDGGTQNPVSSPGMNQELRTMTTNS  
SDPFLNSGTYHSRDESTDSGLSMSSYSVPRTPD DFLNSVDEMMDTGDSISQSNIP SQQRFPDYLEAIPGTNVDL  
GTLEGDGMNIEGEEELMPSLQEQALSSDILNDMESVLAATKLDKESFLTWL PMRLRKLKLPDSFFKPP

rs:XP\_027705323 [XP\_027705323] transcriptional coactivator YAP1 isoform X9 [Vombatus ursinus]. 89..103

MDPGQQPPQAPSQGGQAPSQPPQGGQGGPPTGPGQQAPPGAPGSQAAPPPPPAGHQIVHVRGDSETDL  
EALFNAVMPKNTANVPQTVPMRLRKLKLPDSFFKPPPEPKSHSRQASTDAGTAGALTPQHVRHSSPASLQLGAVSPG  
TLSPSGVVSGPGTAPTQHLRQSSFEIPDDVPLPAGWEMAKTSSGQRYFLNHIDQTTTWQDPRKAMLSQMNV TAP  
TSPPVQQNIMNSASAMNQRIQSAPVKQPPPLAPQSPQGGVMGGGSSNQQQMRLQQLQMEKERLRLKHQELLRQ  
VRPQALRNVPSTANS PKRQEI ALRSQLPTMEQDGGTQNPVSSPGMNQELRTMTTNSSDPFLNSGTYHSRDEST  
D SGLSMSSYSVPRTPD DFLNSVDEMMDTGDSISQSNIP SQQRFPDYLEAIPGTNVDLGTLEGDGMNIEGEEELMPSL  
QEQALSSDILNDMESVLAATKLDKESFLTWL PMRLRKLKLPDSFFKPP

rs:XP\_027705324 [XP\_027705324] transcriptional coactivator YAP1 isoform X10 [Vombatus ursinus]. 89..103

MDPGQQPPQAPSQGGQAPSQPPQGGQGGPPTGPGQQAPPGAPGSQAAPPPPPAGHQIVHVRGDSETDL  
EALFNAVMPKNTANVPQTVPMRLRKLKLPDSFFKPPPEPKSHSRQASTDAGTAGALTPQHVRHSSPASLQLGAVSPG  
TLSPSGVVSGPGTAPTQHLRQSSFEIPDDVPLPAGWEMAKTSSGQRYFLNHIDQTTTWQDPRKAMLSQMNV TAP  
TSPPVQQNIMNSASAMNQRIQSAPVKQPPPLAPQSPQGGVMGGGSSNQQQMRLQQLQMEKERLRLKHQELLRQ  
ALRNVPSTANS PKRQEI ALRSQLPTMEQDGGTQNPVSSPGMNQELRTMTTNSSDPFLNSGTYHSRDESTDSGLS  
MSSYSVPRTPD DFLNSVDEMMDTGDSISQSNIP SQQRFPDYLEAIPGTNVDLGTLEGDGMNIEGEEELMPSLQEQAL  
SSDILNDMESVLAATKLDKESFLTWL PMRLRKLKLPDSFFKPP

rs:XP\_027705325 [XP\_027705325] transcriptional coactivator YAP1 isoform X11 [Vombatus ursinus]. 89..103

MDPGQQPPQAPSQGGQAPSQPPQGGQGGPPTGPGQQAPPGAPGSQAAPPPPPAGHQIVHVRGDSETDL  
EALFNAVMPKNTANVPQTVPMRLRKLKLPDSFFKPPPEPKSHSRQASTDAGTAGALTPQHVRHSSPASLQLGAVSPG  
TLSPSGVVSGPGTAPTQHLRQSSFEIPDDVPLPAGWEMAKTSSGQRYFLNHIDQTTTWQDPRKAMLSQMNV TAP  
TSPPVQQNIMNSASAMNQRIQSAPVKQPPPLAPQSPQGGVMGGGSSNQQQMRLQQLQMEKERLRLKHQELLRQ  
VRPQEI ALRSQLPTMEQDGGTQNPVSSPGMNQELRTMTTNSSDPFLNSGTYHSRDESTDSGLSMSSYSVPRTPD  
D FLNSVDEMMDTGDSISQSNIP SQQRFPDYLEAIPGTNVDLGTLEGDGMNIEGEEELMPSLQEQALSSDILNDMESV  
LAATKLDKESFLTWL PMRLRKLKLPDSFFKPP

rs:XP\_027705327 [XP\_027705327] transcriptional coactivator YAP1 isoform X12 [Vombatus ursinus]. 89..103

MDPGQQPPQAPSQGGQAPSQQPQGGQGGPPTGPGQQAPPAGPSQAAPPPPPAGHQIVHVRGDSETDL  
EALFNAVMPKTANVPQTVPMRLRKLKLPDSFFKPPPEPKSHSRQASTDAGTAGALTPQHVRHSSPASLQLGAVSPG  
TLSPSGVVSQPGTAPTQHLRQSSFEIPDDVPLPAGWEMAKTSSGQRYFLNHIDQTTTWQDPRKAMLSQMNVTAP  
TSPPVQQNIMNSASAMNQRIQSAPVKQPPPLAPQSPQGGVMMGGSSNQQQMRLQQLQMEKERLRLKHQELLRQ  
EIALRSQLPTMEQDGGTQNPVSSPGMNQELRTMTTNSDDPFLNSGTYHSRDESTDSGLSMSSYSVPRTPDFFLNS  
VDEMDTGDSISQSNIPSQQRNRPDYLEAIPGTNVDLGTLEGDGMNIEGEEELMPSLQEQALSSDILNDMESVLAATK  
LDKESFLTWL PMRLRKLKLPDSFFKPP

rs:XP\_002399565 [XP\_002399565] conserved hypothetical protein [Ixodes scapularis].>tr:B7PRF1\_IXOSC [B7PRF1] SubName: Full=Uncharacterized protein {ECO:0000313|EMBL:ECC09173.1, ECO:0000313|VectorBase:ISCW007670-PA}; 45..59

MTRGDLIEQKGNHIVRIRSDSDINLDDLKFAVMQPSNRVPLSVPMLRNLNPASFFQQPERSKSSASHSR  
ESSNDATFSPSSEATAAVVAAAAVPSLPVNHPRHSSPASLQQSYNAPSPQHRLRQQSYDLADEGSLPPGWEMAK  
TSTGQRYFLK PMRLRNLNPASFFQQP

rs:XP\_014956207 [XP\_014956207] transcriptional coactivator YAP1 isoform X1 [Ovis aries]. 84..98

MDPGPPPPQAPQGGQGGPPPAQGGPQGGPPSAPGQPAPPGPPAAPQAPPAGHQIVHVRGDSETDLEALFN  
AVMNPKTANVPQTVPMRLRKLKLPDSFFKPPPEPKSHSRQASTDAGTAGALTPQHVRHSSPASLQLGAVSPGTLTPT  
GVVSGPAAAPAAQHLRQSSFEIPDDVPLPAGWEMAKTSSGQRYFLNHIDQTTTWQDPRKAMLSQMNVTAPTSPPV  
QQNMMNSASGPLPDGWEQAMTQDGEIYYINHKNKTTSWLDPRLDPRFAMNQRIQSAPVKQPPPLAPQSPQGGVL  
GGGSSNQQQMRLQQLQMEKERLRLKQEQELLRQVRPQAMRNINPSTANSPKCQELALRSQLPTLEQDGGTQNPVS  
SPGMSQELRTMTTNSDDPFLNSGTYHSRDESTDSGLSMSSYSVPRTPDFFLNSVDEMDTGDTINQSTLPSQQNRF  
PDYLEAIPGTNVDLGTLEGDGMNIEGEEELMPSLQEQALSSDILNDMESVLAATKLDKESFLTWL  
PMRLRKLKLPDSFFKPP

rs:XP\_014956208 [XP\_014956208] transcriptional coactivator YAP1 isoform X2 [Ovis aries]. 84..98

MDPGPPPPQAPQGGQGGPPPAQGGPQGGPPSAPGQPAPPGPPAAPQAPPAGHQIVHVRGDSETDLEALFN  
AVMNPKTANVPQTVPMRLRKLKLPDSFFKPPPEPKSHSRQASTDAGTAGALTPQHVRHSSPASLQLGAVSPGTLTPT  
GVVSGPAAAPAAQHLRQSSFEIPDDVPLPAGWEMAKTSSGQRYFLNHIDQTTTWQDPRKAMLSQMNVTAPTSPPV  
QQNMMNSASGPLPDGWEQAMTQDGEIYYINHKNKTTSWLDPRLDPRFGKAMNQRIQSAPVKQPPPLAPQSPQGG  
VLGGGSSNQQQMRLQQLQMEKERLRLKQEQELLRQAMRNINPSTANSPKCQELALRSQLPTLEQDGGTQNPVSSP  
GMSQELRTMTTNSDDPFLNSGTYHSRDESTDSGLSMSSYSVPRTPDFFLNSVDEMDTGDTINQSTLPSQQNRF  
PDYLEAIPGTNVDLGTLEGDGMNIEGEEELMPSLQEQALSSDILNDMESVLAATKLDKESFLTWL  
PMRLRKLKLPDSFFKPP

rs:XP\_014956209 [XP\_014956209] transcriptional coactivator YAP1 isoform X3 [Ovis aries]. 84..98

MDPGPPPPQAPQGGQGGPPPAQGGPQGGPPSAPGQPAPPGPPAAPQAPPAGHQIVHVRGDSETDLEALFN  
AVMNPKTANVPQTVPMRLRKLKLPDSFFKPPPEPKSHSRQASTDAGTAGALTPQHVRHSSPASLQLGAVSPGTLTPT  
GVVSGPAAAPAAQHLRQSSFEIPDDVPLPAGWEMAKTSSGQRYFLNHIDQTTTWQDPRKAMLSQMNVTAPTSPPV  
QQNMMNSASGPLPDGWEQAMTQDGEIYYINHKNKTTSWLDPRLDPRFAMNQRIQSAPVKQPPPLAPQSPQGGVL  
GGGSSNQQQMRLQQLQMEKERLRLKQEQELLRQAMRNINPSTANSPKCQELALRSQLPTLEQDGGTQNPVSSPGM  
SQELRTMTTNSDDPFLNSGTYHSRDESTDSGLSMSSYSVPRTPDFFLNSVDEMDTGDTINQSTLPSQQNRF  
PDYLEAIPGTNVDLGTLEGDGMNIEGEEELMPSLQEQALSSDILNDMESVLAATKLDKESFLTWL  
PMRLRKLKLPDSFFKPP

rs:XP\_014956210 [XP\_014956210] transcriptional coactivator YAP1 isoform X4 [Ovis aries]. 84..98

MDPGPPPPQAPQGGQGGPPPAQGGPQGGPPSAPGQPAPPGPPAAPQAPPAGHQIVHVRGDSETDLEALFN  
AVMNPKTANVPQTVPMRLRKLKLPDSFFKPPPEPKSHSRQASTDAGTAGALTPQHVRHSSPASLQLGAVSPGTLTPT  
GVVSGPAAAPAAQHLRQSSFEIPDDVPLPAGWEMAKTSSGQRYFLNHIDQTTTWQDPRKAMLSQMNVTAPTSPPV  
QQNMMNSASGPLPDGWEQAMTQDGEIYYINHKNKTTSWLDPRLDPRFGKAMNQRIQSAPVKQPPPLAPQSPQGG  
VLGGGSSNQQQMRLQQLQMEKERLRLKQEQELLRQVRPQELALRSQLPTLEQDGGTQNPVSSPGMSQELRTMTTN

SSDPFLNSGTYHSRDESTDSGLSMSSYSVPRTPDDFLNSVDEMDTGDTINQSTLPSQQNRFPDYLEAIPGTNVDL  
GTLEGDGMNIEGEEELMPSLQEQALSSDILNDMESVLAATKLDKESFLTWL PMRLRKLPSDFFKPP

rs:XP\_014956211 [XP\_014956211] transcriptional coactivator YAP1 isoform  
X5 [Ovis aries]. 84..98

MDPGPPPPQPAPQGGQPPPAQGPQGGPPSAPGQPAPPPGPPAAPQAPPAGHQIVHVRGDSETDLEALFN  
AVMNPKTANVPQTVPMRLRKLPSDFFKPPEPKSHSRQASTDAGTAGALTPQHVRHSSPASLQLGAVSPGTLTPT  
GVVSGPAAAPAAQHLRQSSFEIPDDVPLPAGWEMAKTSSGQRYFLNHIDQTTTWQDPRKAMLSQMNVTAPTSPV  
QQNMMNSASGPLPDGWEQAMTQDGEIYYINHKNKTTSWLDPRLDPRFAMNQRISSQAPVKQPPPLAPQSPQGGVL  
GGGSSNQQQMRLQQLQMEKERLRLKQEQELLRQVRPQELALRSQLPTLEQDGGTQNPVSSPGMSQELRTMTTNS  
DPFLNSGTYHSRDESTDSGLSMSSYSVPRTPDDFLNSVDEMDTGDTINQSTLPSQQNRFPDYLEAIPGTNVDLGT  
LEGDGMNIEGEEELMPSLQEQALSSDILNDMESVLAATKLDKESFLTWL PMRLRKLPSDFFKPP

rs:XP\_014956212 [XP\_014956212] transcriptional coactivator YAP1 isoform  
X6 [Ovis aries]. 84..98

MDPGPPPPQPAPQGGQPPPAQGPQGGPPSAPGQPAPPPGPPAAPQAPPAGHQIVHVRGDSETDLEALFN  
AVMNPKTANVPQTVPMRLRKLPSDFFKPPEPKSHSRQASTDAGTAGALTPQHVRHSSPASLQLGAVSPGTLTPT  
GVVSGPAAAPAAQHLRQSSFEIPDDVPLPAGWEMAKTSSGQRYFLNHIDQTTTWQDPRKAMLSQMNVTAPTSPV  
QQNMMNSASGPLPDGWEQAMTQDGEIYYINHKNKTTSWLDPRLDPRFGKAMNQRISSQAPVKQPPPLAPQSPQGG  
VLGGGSSNQQQMRLQQLQMEKERLRLKQEQELLRQELALRSQLPTLEQDGGTQNPVSSPGMSQELRTMTTNSDP  
FLNSGTYHSRDESTDSGLSMSSYSVPRTPDDFLNSVDEMDTGDTINQSTLPSQQNRFPDYLEAIPGTNVDLGTLE  
GDGMNIEGEEELMPSLQEQALSSDILNDMESVLAATKLDKESFLTWL PMRLRKLPSDFFKPP

rs:XP\_014956206 [XP\_014956206] transcriptional coactivator YAP1 isoform  
X7 [Ovis aries]. 84..98

MDPGPPPPQPAPQGGQPPPAQGPQGGPPSAPGQPAPPPGPPAAPQAPPAGHQIVHVRGDSETDLEALFN  
AVMNPKTANVPQTVPMRLRKLPSDFFKPPEPKSHSRQASTDAGTAGALTPQHVRHSSPASLQLGAVSPGTLTPT  
GVVSGPAAAPAAQHLRQSSFEIPDDVPLPAGWEMAKTSSGQRYFLNHIDQTTTWQDPRKAMLSQMNVTAPTSPV  
QQNMMNSASGPLPDGWEQAMTQDGEIYYINHKNKTTSWLDPRLDPRFGKAMNQRISSQAPVKQPPPLAPQSPQGG  
VLGGGSSNQQQMRLQQLQMEKERLRLKQEQELLRQVRPQAMRNINPSTANSPKCQELALRSQLPTLEQDGGTQNP  
VSSPGMSQELRTMTTNSDPFLNSGTYHSRDESTDSGLSMSSYSVPRTPDDFLNSVDEMDTGDTINQSTLPSQQN  
RFPDYLEAIPGTNVDLGTLEGDGMNIEGEEELMPSLQEQALSSDILNDMESVLAATKLDKESFLTWL  
PMRLRKLPSDFFKPP

rs:XP\_027813325 [XP\_027813325] protein **FAM181A** [Ovis aries]. 130..144

MASDSVDMKLLNFVNLASSDIKAALDKSAPCRRSVDHRKYLQKQLKRFSQKYSRLPRGLPGRGAEPHLK  
RGPEDRPRPLHLESGHGSSPSGGGGYKEKALGNPDREESLSKERTLHGPDPGAARPGQVPMRKRQLPASFWEEP  
RPTHSYVGLGGLGREGPPYEGKKHKGLEPLGPETTPVPTSAPRAEKEPLKMPGVSLVGRVSAWSCCPFY  
HGQPIYPSPPGALPQSPMPSLGLWRKSAASPGELAHFCKDAEGPGQKVYRPPVVLKPIPTKPAVPPPIFNVFGYL  
PMRKRQLPASFWEEP

rs:XP\_027887762 [XP\_027887762] transcriptional coactivator YAP1-like  
isoform X5 [Xiphophorus couchianus]. 46..60

MDAHRGAPPAGQVVHVRGDSKTELEALFNAVMPNSKATRQPPSVPMRMRKFPDSFFKPPEPRGHSRQA  
SSDGGLCGSLAPHHVRAHSSPASLPVNSLSAQADADAAATPIIPDDVPLPDGWEAKTSTGQRYFINHVHRTTWTW  
QDPRLSQLQSAQAQHQIACPTPSHAHSFSNPAPTTQPKNIVPETAPKVNPAIILSLAMQORLEKLRKQGIQQFAP  
QVQEAGGSNQMPGGMDHRSQAQMLVPSVDIRIRALNQEPNLNGAHSRNESTDSGLSVSSLSRTSDHMLSSVDHMD  
TGDSSEPPSMGLQESMPVLPINEDLMPGIPDSLTSDMLMEMDVTLSGPHMDRDSLLTWTW  
PMRMRKFPDSFFKPP

rs:XP\_027887763 [XP\_027887763] transcriptional coactivator YAP1-like  
isoform X6 [Xiphophorus couchianus]. 46..60

MDAHRGAPPAGQVVHVRGDSKTELEALFNAVMPNSKATRQPPSVPMRMRKFPDSFFKPPEPRGHSRQA  
SSDGGLCGSLAPHHVRAHSSPASLPVNSLSAQADADAAATPIIPDDVPLPDGWEAKTSTGQRYFINHVHRTTWTW  
QDPRLSQLQSAQAQHQIACPTPSHAHSFSNPAPTTQPKNIVPETAPKVNPAIILSLAMQORLEKLRKQGIQQFAP  
QEAGGSNQMPGGMDHRSQAQMLVPSVDIRIRALNQEPNLNGAHSRNESTDSGLSVSSLSRTSDHMLSSVDHMDT  
DSSEPPSMGLQESMPVLPINEDLMPGIPDSLTSDMLMEMDVTLSGPHMDRDSLLTWTW PMRMRKFPDSFFKPP

rs:XP\_027900342 [XP\_027900342] protein **FAM181B** [Xiphophorus couchianus].  
246..260

MQVVGHKQRVKFPGFPSLLLLFDVLTSSVLPPEPSSSSVAVTSSLDCLWKLHEQHQEQLIRRTKSCF  
EETFSSGITVDATGVAAGLDRVMAVQTAIMNPQFMSFCFPDSVMVEYDVEKSLDGSLLCEAENDEDFKETTRDLLS  
FIDSASSNIKLALDKPVKSKRKNVHRKYLQKQIKRCTGIITPGNTSEAPLKRQGSFVNQQGPVQSKTLQKREGGQ  
ANLQSKSLAALFSPVKEIRGEKAKKPPMRHRNLPPSFFTEPANCSRVSSTSGMTLKDLEGRNPEAADFFELLGPD  
YSNMVNEQDIYQGVPLRGQPDGLGGLDPASYDHLVGGLLYTEPWTNCSGQCKKPSEGLRSGPPQPPVYSQAEDTSV  
PLDDNGLCTLTFPNFFPDCSISQVTYDLNGGYNKTHFSCL PMRHRNLPPSFFTEP

rs:XP\_027901385 [XP\_027901385] transcriptional coactivator YAP1 isoform  
X1 [Xiphophorus couchianus]. 45..59

MDPNQHNPPAGHQIVHVRGDSQTDLELLFNFSVMNPKTSNVPPSVPMRMRKLPDSFFKPPPEPKSHSRQAS  
TDAGSGGVLTPHHVRAHSSPASLQLGAVSGGSLSGMASAGASPOHLRQASYEIPDEVPLPAGWEMAKTNSGQRYF  
LKLQNSEKEQDISSHNEKTTTWQDPRKSLLOMNQAPVPPSSVPVQPNLMNPASGSLPEGWEQAVTQEGEIIYYI  
NHTNKTTSWLDPRLEPRYALNQQLTQSAPGKQSGQLPSSTHGGVMGGNNQLRLQQIEKERLRLQQHRPQELALR  
NQLPTSMDQDGSSTNPVSSPLAQDARTMTVNSSDPFLNSGTYHSRDESTDSGLSMSSYSVPRTPDFFLNSVDEMDT  
GDPLPASIASQPSRFPDYLDIAIPGTDVDLGTLEGENMAVEGEELMASLQEPSSDILSDMESVLAATKIDKENFL  
TWL PMRMRKLPDSFFKPP

rs:XP\_027901386 [XP\_027901386] transcriptional coactivator YAP1 isoform  
X2 [Xiphophorus couchianus]. 45..59

MDPNQHNPPAGHQIVHVRGDSQTDLELLFNFSVMNPKTSNVPPSVPMRMRKLPDSFFKPPPEPKSHSRQAS  
TDAGSGGVLTPHHVRAHSSPASLQLGAVSGGSLSGMASAGASPOHLRQASYEIPDEVPLPAGWEMAKTNSGQRYF  
LNHNKTTTWQDPRKSLLOMNQAPVPPSSVPVQPNLMNPASGSLPEGWEQAVTQEGEIIYYINHTNKTTSWLDP  
RLEPRYALNQQLTQSAPGKQSGQLPSSTHGGVMGGNNQLRLQQIEKERLRLQQHRPQELALRNQLPTSMDQDGS  
TNPVSSPLAQDARTMTVNSSDPFLNSGTYHSRDESTDSGLSMSSYSVPRTPDFFLNSVDEMDTGDPLPASIASQ  
SRFPDYLDIAIPGTDVDLGTLEGENMAVEGEELMASLQEPSSDILSDMESVLAATKIDKENFLTWL  
PMRMRKLPDSFFKPP

rs:XP\_027855919 [XP\_027855919] protein **FAM181A** [Xiphophorus couchianus].  
102..116

MSSADSEVKTLNLFVNLAASSDIKAALDKSAPCRRSVDHRKYLQKQLKRFSQKFSRVPRGQSLTSADNRC  
ARGAERQRATATDQASSDAQHAQSVGGMLDQVPMRKRQLPASFWEEPRLTKARRDKSFLDLRRSSSSGTSDDGGEN  
EKRRRSQEDAQKTANSSSGRRSSAEKEVLKLDLTSRHSVFCSCCPFFQFHGHQVLHSQIVVPHPPFGLWSKAAEP  
QRSEHQYGGKQLHTHVVKPIPTKATAQSPIFSVFGFI PMRKRQLPASFWEEP

rs:XP\_027982546 [XP\_027982546] protein **FAM181B** [Eumetopias jubatus].  
221..235

MAVQAALLSTHPFVFGFGGSPDGLGGAFGALDKGCCFEDDETGTTPAGALLAGAEGGDVREATRDLLSF  
IDSASSNIKLALDKPGKSKRKNVHRKYLQKQIKRCSGLMGAAPPSPGAPDAPAKRSLAGPGAQNVAVPLHGK  
AAPPREASQAAAAASLQSRSLAALFDSLHRVPGGDERAGGSVAAPVAGIGGAGAGGSGGDAAGPAGGTAVPGARK  
VPLRARNLPPSFFTEPSRAGGGGCGPSGPGVSLGDLEKGAEEVEFFELLGPDYAGTEASVLLAAEPLDVFPPTGA  
AVLRGPPELEPGLFEQPPAMVGSLLYSESWAPGCPPTKKPPLAAPRGGLTLNEPLRPLYPSAADSPPGGEDAPGL  
LASFAPFFSDCALPTPPPPHQVSYDYSAGYSRTAYSSLWRPDGVWEGAPGEEGAHRD PLRARNLPPSFFTEP

rs:XP\_007184309 [XP\_007184309] protein **FAM181A** [Balaenoptera  
acutorostrata scammoni]. 129..143

MASDSDVKMLLNLFVNLAASSDIKAALDKSAPCRRSVDHRKYLQKQLKRFSQKYSRLPRGLPGRGAEPHLK  
RGSEDQPGRLPLDSGHSSSPSGGGCCKEKALGNPYREECLSKEQTLHGPDPEAARPGQVPMRKRQLPASFWEEP  
PTHSYVPLEGGLGREGPPYEGKKHRKGLEPLGPETAPVPASPRAPAEKEPLKMPGVSLVGRVNAWSCCPFYH  
GQPVYPGAPALPQSPLPSLGLWRKSSASPELAHFCKDVEGPGQKVYRPVVLKPIPTKAMPPIIFNVFGYL  
PMRKRQLPASFWEEP

rs:XP\_026812708 [XP\_026812708] transcriptional coactivator YAP1  
[Rhopalosiphum maidis]. 66..80

MSGLOQQQQEQHQVSIKMEPTGPSSPTPAVNSNLVVRVDQNSSETDLQALFDTVLKPDGKKPLQLPLRM  
RQLPKSFFNPPSTGSKSPSISHSRENSGDSAFGTAAGQSCTGGPVPMSRAHSSPASLQQTYAVGAAKQQQQQQ  
QHAKQRSYDVSSAIDELGPLPQGWQARTPEGQIYYLNHLTRTTQWEDPRKSLAAQANQHQRSAEQLLSPGND  
GSSTNATSTPTNSPPHIHSTLQGTNKNVTLGLPLPDGWEQAVTGDGETYFINHIARTTSWFDPRIPVHLQRAPTS

AVLPSGSASWLLNGASGLSLSLQVTTQQLRLHSLQLERERLKSRRQOEIIRQQDLMSRSGHTNNDLDPFLSCSSSS  
VDHSRQESADSLGLGNNYSLPHTPEDFLSSNMDDNMDCTSESDNPGPSSDMSVVDSDQEMATLDVTDLVLPSLQL  
GDEFGNDILDEVQLLIDPNNKPGSILTWL PLRMRQLPKSFFNPP

rs:NP\_001029174 [NP\_001029174] transcriptional coactivator YAP1 [Rattus norvegicus].>gp:DQ186898\_1 [DQ186898] neuron-specific YAPdeltaC insert61 isoform [Rattus norvegicus] 70..84

MEPAQQPPPQAPQGPAPPSVSPAGTPAAPPAPPAGHQVVHVRGDSETDLEALFNAVMPKTANVPQTV  
PMRLRKLKLPDSFFKPPPEPKSHSRQASTDAGTAGALTPQHVRHSSPASLQLGAGTLTASGVVSGPAATPAAQHRLRQ  
SSFEIPDDVPLPAGWEMAKTSSGQRYFLNHNDQTTTWDQPRKAMLSQLNVPTSASPAVPQTLMNSASGPLPDGWE  
QAMTQDGEVYIINHKNKTTSWLDPRLDPRFAMNQIRITQSAPVKQPPPLAPQSPQGGVLLGGSSNQQQQIQLQQLQ  
MEKERLRLKQQLFRQAIRNINPSTANAPKCQTVRAGISSPQPVALTGAGWRDSECSVFSRDDSIEDNDNQ  
PMRLRKLKLPDSFFKPP

rs:NP\_067402 [NP\_067402] protein **FAM181B** [Mus musculus]. 215..229

MAVQAALLSSHPFIPFGFGGSADGLVSAFGSLDKGCCFEDDESGATAGALLSGSEGGDVREATRDLLSF  
IDSASSNIKALDKPGKSKRKNVHRKYLQKQIKRCSGLMGTAPPRPASPSAADAPAKRPPGAPTVAATPAHCKAAP  
RREATQAAAAASLQSRSLAALFDSLRLHIPGGAETAGGAEAVSVPLGAASAVGDGAGTAVSSVAPGTRKRVPLRAR  
NLPPSFFTEPSRVGCGGASGVPSGQGVSLGDLEKGAEEVEFFELLAPDFGSGNDSGVLMAADPLDFPPAGATVLR  
GPLELESGPFEPAMVGNLLYPEPWNTSPSCPQTKKPPVAGVRRGGVTLNEPVRLLLYPTALDSPGGEDAPALSSFTF  
FFPDCALPPPQVSYDYSAGYSRAVYPSLWRPDGVWEGASGEEGGHPD PLRARNLPPSFFTEP

rs:XP\_002604434 [XP\_002604434] hypothetical protein BRAFLDRAFT\_122292

[Branchiostoma floridae].>tr:C3YGX4\_BRAFL [C3YGX4] SubName:  
Full=Uncharacterized protein {ECO:0000313|EMBL:EEN60445.1}; 222..236

MKEDGSFSRKGHSFIHSFTDFCNGGAAMVAFIFGSRLLHRLRGPSPGPKMTQGEENAICGRAERTHQQRKC  
KMAQSGGGPADADVKTLNLFVNLASSDIKAALDKSAPCKRSVDHRKYLQKQLKRFQRRVLPYVATRPVKDIT  
ATTTTPAASLLKRRPESTSSVNSESSSGSGSESCGSEAGPILAESCHPIDLSMPDRELPEGEKEQEAGLQDPAGAD  
SVPLRKRALPASFWQEPGVQKQSSSSRGPSPSCSAEESAGSPGKQDCQPAGEETAXPPRDITSHGLDRFPPTAGA  
ARTARVTAVPRVPPVPRVRPPSSLRVRPRSAAGSAAGTLRSPWPAGARTVRPPPTKGVVLLVPGAHEHFRLLGGVQ  
SVPVVRTPPPRVRARTPQSAGGGTRAILPSMGPDKPSPLLVLTNHNKTKQNMETDQSHKCNLNPHEIPPTAHVGP  
IFRHYFVPRLLLRLGNLFLPKDYIGYSRNGRFSVALL PLRKRALPASFWQEP

rs:XP\_002598271 [XP\_002598271] hypothetical protein BRAFLDRAFT\_69626

[Branchiostoma floridae].>tr:C3ZYL2\_BRAFL [C3ZYL2] SubName:  
Full=Uncharacterized protein {ECO:0000313|EMBL:EEN54283.1}; 165..179

MRLDMTDSNPMLMELHPPPHPSQRLSPGGTPGSNPSPSHSPSCSPRPSEVETDLSLFSMDTACNSI  
KLALDRPSRSRRKVNHRKYLQKQIKRCTQKLSPGDGESDDKDDNASDKEAATANKPTSRRDISHIGAQSKSLAALF  
DPNTLKRPNVNPAPTRGRTRVPLRKRNLPPSFFTEPGNQSGPRGAFQCTVAGSWPLDGYRHPGVSDSLDIFNPDI  
ADLITNWQDESGHISDPSMSAHAMPGNTAMAAPGDHASIMLHMSPQPYGTNFMNYPQTSNQGLLTTAPQSWMS  
GSPSYSPAPASNYPASRDDFSRVGYPSSSSAGLSGLYAPQVHQMPGSLPDPFPQAFGHGQAAIGQQWPNSLCYTY  
L PLRKRNLPPSFFTEP

rs:XP\_002590553 [XP\_002590553] hypothetical protein BRAFLDRAFT\_86233

[Branchiostoma floridae].>tr:C3ZLU1\_BRAFL [C3ZLU1] SubName:  
Full=Uncharacterized protein {ECO:0000313|EMBL:EEN46564.1}; 135..149

MAGKTGGKVGFPSSGGKVGFSGKRGASAPVSSSDEEEIEKEVQEPKEDYENIASPCSSTSSGPVYERQP  
GFEKHGHEVVVPRRPKIKHKIKRKKMANFMLGGDHDYFYTASRGRKDGTMVPTPPSKGPKRDTVPMRLRALPQS  
FWQQPNMNNNSPGSLYPVLPVVNKEVSDLDLQVVSVPTEIRPVTPPEERTETDVQEKERTVRKDEEIPPTKP  
EKSVEKVTIKDDKEKTEKEVKKEKIDLVVEVVSAGATVTVTTTAPPRTTRTVRTVTVSTVPNTDLLFSLFDGVDPETK  
RQTVKLRGRPKRIHLEGMNAPRPRSQDNDPYMVDNIAERLFPVLSLENRKQNTNPANPNVTTTLHYITLNGEDE  
KSSVSLPAVRVETNYSQMLSELVMHI PMRLRALPQSFVQQP

rs:XP\_001841862 [XP\_001841862] conserved hypothetical protein [Culex quinquefasciatus].>tr:B0VZH8\_CULQU [B0VZH8] SubName: Full=Uncharacterized protein {ECO:0000313|EMBL:EDS31715.1, ECO:0000313|VectorBase:CPIJ000289-PA}; 65..79

MAFNSSSSASNNNNNTASNTSASEENDGASKKNLIILVDKDSNDKLNELFDKTLNKLPLQIPYRMR  
KLPDSFFKPPSSGSKSPSVSHSRENSADSAFGSGTTILGGVNPVTGPNGLPIHHSRAHSSPASLGIKIPAGLISSL

TGGGGSGSGVAQATGNSSKAQQQADSSSLGASSVAQQQQQQAQQGLPKQAIQHLHARGRSYDVSNLHANFGELPP  
GWEQAKTQDGRIYYIK PYMRKLPDSFFKPP

tr:G3V5K4\_HUMAN [G3V5K4] SubName: Full=Protein **FAM181A**  
{ECO:0000313|Ensembl:ENSP00000452393}; Flags: Fragment; 129..143  
MASDSVKMLLNFNVLASSDIKAALDKSAPCRRSVDHRKYLQKQLKRFSQKYSRLPRGLPGRAAEPYLK  
RGSEDRPRLLLLDLGPDSSPGGGGGCKEKLVRNPYREECLAKEQLPQRQHPEAAQPGQVPMRKRQLPASFWEEP  
PTHSHYHVGLEGLGPREGPPYEGKKNCKGLEPLGPETTLVSMSPRALAEKEPLKMPGVSLVGRVNAWSCCPFYH  
GQPIYPGPLGALP PMRKRQLPASFWEEP

tr:A0A183VN97\_TRIRE [A0A183VN97] SubName: Full=Uncharacterized protein  
{ECO:0000313|EMBL:VDP97832.1, ECO:0000313|WBParaSite:TRE\_0000195501-mRNA-  
1}; 38..52  
MEGYDSRKPPSVRVTVLEDPNSSLQELFNPVSQRQQVPLHQKRLPKSFFVPPGDANETSFRSKLNSLHC  
NERNSSDFVVFHNSKANSSPACLDAALRTPVSVNAPNHAHQKSLDVASKYISEFSPDFSFSDSCSPGFIQRQTPLL  
CRPTVAFAISDLVPGYDMAINESNQVYFLNHQTQETTWIPEKFQNWGMTPEELEQVHIRYAKQFLCTNPANLNV  
NIQQVGDVDFSYDFQFCRFNKEVAVEFIMIFSSLA PLHQKRLPKSFFVPP

tr:A0A182GV27\_AEDAL [A0A182GV27] SubName: Full=Uncharacterized protein  
{ECO:0000313|EMBL:KXJ73217.1, ECO:0000313|VectorBase:AALF016259-PA};  
59..73  
MAFNKSPGNNSSATSNTSEENDGARKKENLILLVAKDSNDKLNELFDKTLNRLPLQIPLMRKLPDSF  
FKPPSSGSKSPSVSHSRENSADSAFGSGTTILGGVTTGPNGLPIHHSRAHSSPASLGKIPAGLVASINAANAAQQ  
AANSSNVNSNKTQQPGSVNGGGASSGGDGSSAAAQVQQQQAQQQAAQQQSLTRQAILHSRGRSYDVSNQHAVY  
GDLPPGWEQAKTQDGRIYYLNRNRNREPVLQCPVTASLAAMYACMRISRTAVQLPSPVASTVHQTKPNQAESLI  
SNLTGLKFYTKPFLPAGALIRSPNPSSD PLMRKLPDSFFKPP

tr:A0A182H4T7\_AEDAL [A0A182H4T7] SubName: Full=Uncharacterized protein  
{ECO:0000313|EMBL:KXJ71032.1, ECO:0000313|VectorBase:AALF021713-PA};  
59..73  
MAFNKSPGNNSSATSNTSEDNDGARKKENLILLVAKDSNDKLNELFDKTLNRLPLQIPLMRKLPDSF  
FKPPSSGSKSPSVSHSRENSADSAFGSGTTILGGVTTGPNGLPIHHSRAHSSPASLGKIPAGLVASINAANAAQQ  
AANSSNVNSNKTQQPGSVNGGGASSGGDGSSAAAQVQQQQAQQQAAQQQSLTRQAILHSRGRSYDVSNQHAVY  
GDLPPGWEQAKTQDGRIYYLK PLMRKLPDSFFKPP

tr:A0A0A9VUR8\_LYGHE [A0A0A9VUR8] SubName: Full=Uncharacterized protein  
{ECO:0000313|EMBL:JAF99448.1}; 48..62  
MSGNPDGRGVQQGSNLVVRIDHDSETELQALFDSVLKPEAKQRPQSKPFRMRNLNPSFFNPPSTGSKSP  
SVSSISHSRENSADSAFGTTTTTMMGGLTVNHPRAHSSPASLQQTYASASVVASSPQHLKQRSYDISSLDDLGLPLP  
LGWEQARTSEGQIYFLNHMTQTTTWEDPRKTAQAQQQAQQRSQELLNTVATSPHPSTSPQPHQGKNGGVSPGST  
AGLGPLPDGWEQAQTLGEGVYFINHRTKTTSWFDPRI PVHLQRAPAAGNVLP SWLQQSLSPSANIAASQQQKRLR  
QSLQQERERLKVQAEIMRQQELMLRDAPATTGLDPFLSGLADHSRQESADSGLGLGNNYSLPHTPDDFLSTMDD  
NMDGVSEAGAEMGSLDSHELTISDNIDSTDDLVP SLQLGEEFSSDILDDVQALINPNSKPGNSLTWL  
PFRMRNLNPSFFNPP

tr:A0A146LQ05\_LYGHE [A0A146LQ05] SubName: Full=Yorkie  
{ECO:0000313|EMBL:JAQ06137.1}; 48..62  
MSGNPDGRGVQQGSNLVVRIDHDSETELQALFDSVLKPEAKQRPQSKPFRMRNLNPSFFNPPSTGSKSP  
SVSSISHSRENSADSAFGTTTTTMMGGLTVNHPRAHSSPASLQQTYASASVVASSPQHLKQRSYDISSLDDLGLPLP  
LGWEQARTSEGQIYFLNHMTQTTTWEDPRKTAQAQQQAQQRSQELLNTVATSPHPSTSPQPHQGTTHHEFAFVEV  
NRVKLECKNGGVSPGSTAGLGLPLPDGWEQAQTLGEGVYFINHRTKTTSWFDPRI PVHLQRAPAAGNVLP SWLQQS  
LSPSANIAASQQQKRLRQSLQQERERLKVQAEIMRQQELMLRDAPATTGLDPFLSGLADHSRQESADSGLGLGN  
NYSLPHTPDDFLSTMDDNMDGVSEAGAEMGSLDSHELTISDNIDSTDDLVP SLQLGEEFSSDILDDVQALINPNS  
KPGNSLTWL PFRMRNLNPSFFNPP

tr:A0A0A9WFH8\_LYGHE [A0A0A9WFH8] SubName: Full=Uncharacterized protein  
{ECO:0000313|EMBL:JAG07202.1}; 48..62  
MSGNPDGRGVQQGSNLVVRIDHDSETELQALFDSVLKPEAKQRPQSKPFRMRNLNPSFFNPPSTGSKSP  
SVSSISHSRENSADSAFGTTTTTMMGGLTVNHPRAHSSPASLQQTYASASVVASSPQHLKQRSYDISSLDDLGLPLP

LGWEQARTSEGQIYFLNHMTQTTTWEDPRKTAQAQQQAAQQRSQELLNTVATSPHPSTSPQPHQAVHLQRAPAAG  
NVLPSWLQQSLSPSANIAASQQQKRLRLQSLQOQERERLKVRAEIMRQOELMLRDAPATTGLDPFLSGLADHSRQE  
SADSGGLGNYSPLPHTPDDFLSTMDDNMDGVSEAGAEMGSLDSHELTISDNIDSTDDLVPSSLQLGEEFSSDILD  
DVQALINPNSKPGNSLTWL PFRMRNLNPSFFNPP

tr:A0A0K8T574\_LYGHE [A0A0K8T574] SubName: Full=Yorkie  
{ECO:0000313|EMBL:JAQ05452.1}; 48..62

MSGNPDGRGVQQGSNLVVRIDHDSETELQALFDSVLKPEAKQRPQSKPFRMRNLNPSFFNPPSTGSKSP  
SVSSISHSRENSADSAFGTTTTTMMGGLTVNHPRAHSSPASLQQTYSASVAVASSPQHLKQRSYDISSLDDLGPLP  
LGWEQARTSEGQIYFLNHMTQTTTWEDPRKTAQAQQQAAQQRSQELLNTVATSPHPSTSPQPHQAVHLQRAPAAG  
NVLPSWLQQSLSPSANIAASQQQKRLRLQSLQOQERERLKVRAEIMRQOELMLRDAPATTGLDPFLSGLADHSRQES  
ADSGGLGNYSPLPHTPDDFLSTMDDNMDGVSEAGAEMGSLDSHELTISDNIDSTDDLVPSSLQLGEEFSSDILD  
VQALINPNSKPGNSLTWL PFRMRNLNPSFFNPP

tr:A0A183KYQ6\_9TREM [A0A183KYQ6] SubName: Full=Uncharacterized protein  
{ECO:0000313|EMBL:VDP71499.1, ECO:0000313|WBParaSite:SCUD\_0002020601-mRNA-  
1}; 38..52

MEGYDSRKPPSVRVTVLEDPNSSLQELFNPASQRQOVPLHQRNLPKSFVPPGDVNDNSRLSKLNSVHS  
NERNSADVFVHFSKANSSPACLDAALRTSVSANVPNHSHQKSLDVASKYKTEFSPDFAFSGSCSPGFFQQRNSQ  
QTALLYGPTMTFAISELPVGYDMAINESNQVYFLNHQTQETTWFDPRIPEKFQKWGMTPEELEQVHLRYAKQFLC  
TIPSSNLNVCVQQVGEFIKILYDMSAR PLHQRNLPKSFVPP

tr:A0A132A5J4\_SARSC [A0A132A5J4] SubName: Full=Yorkie-like protein  
{ECO:0000313|EMBL:KPM06232.1, ECO:0000313|VectorBase:SSCA010042-PA};  
52..66

MHLKSESESNNTDHHNNGNAIVRVESAAGLDELFAIMSPNDGQSRPLHQVPMRQRRLPPSFFRPPSAS  
SSNNSLASASHSRESSLDGGYQSGQTPVNTPNNGQAKQNNVTVLNYSGANNGMI IHPRANSSPAALQPANESVNN  
LSSSGGQSFNSNEVLAKPSNESATINSAPLTTFRQMSYDLNQIRLPDGWEMSFTASGERYFLNHKEKTTTWEDP  
RKKIVEEMLHHNNSSSKQLPSINSLHPQNVGSLSSASNMQPQQQQQSSAIQTSVQNGLSQQQNSSGSITSTPLP  
ASNSTHVVEHLSYIDPTLVPLPNGWEQAQTNTGDIYFISHIDQTTTWFHPSIPRNLQMKRIQQQTCSIQPPPFQ  
TNGAKNASTINNNAMNIPPELVVALKNMNTSCQQQTSASITASSIMPPVASMVTNPLEMSMQKTPQNQHRLDLE  
LERERMKQRQEELLQSSLLNSSASNNLLSVSNQDQATSSPFMLQNECHSRQDSIDSGLDLGNSSGFSSTPLLTIDS  
NMFRLTNNPTSSTTTTTPAQTNFLPTVISNQTVSSNTANTNNAPLSDEMMAFENMQISGLDLDESMDFMQGLDID  
LLSNVEELLNSNKNIMTWL PMRQRRLPPSFFRPP

tr:A0A084W439\_ANOSI [A0A084W439] SubName: Full=AGAP006045-PA-like  
protein {ECO:0000313|EMBL:KFB44983.1}; 68..82

MAYNASGAGGSGAGAAAAAVAGNGTEENEPTGASKKKNLIIIVDKDSNDKLNELFDKTLNKLPLQIPY  
RMRKLPESFFMPPSSGSKSPSVSHSRENSADSAFGSGTTILGGVTTGPNGLPIHHSRAHSSPASLGKIPVGM  
GGLGGGVVAAAVAAAAAASGNNGGNGGAGGGGGGGGAGVNVNGQKAAAVAAQNGQQNDASSLGA AVLQQ  
AALSKAAIQHLHSRGRSYDVSNLHANFGEPPGWEQAKTQDGRIYYIK PYRMRKLPESFFMPP

tr:Q16HH7\_AEDAE [Q16HH7] SubName: Full=AAEL014018-PA  
{ECO:0000313|EMBL:EAT33707.1}; 59..73

MAFNGPSNNTSAASNTSDENDGARKKENLILLVAKDSNDKLNELFDKTLNRLPLQIPLRMRKLPDSF  
FKPPSSGSKSPSVSHSRENSADSAFGSGTTILGGVTTGPNGLPIHHSRAHSSPASLGKIPAGLVASINAANQQQQ  
QQSANNSSNVNSNKSQPGNVAGGGSGGDGPSAAVQQQQAQQQAQQQSLTRQAILHSRGRSYDVSNQHAHYGELPP  
GWEQAKTQDGRIYYLHNHTRTTTWEDPRITAAMQOESLQQQQQSSVETLFTNTGSQTLLSPTISSPTPTNNVDNV  
NNHFA PLRMRKLPDSFFKPP

tr:Q1DGN2\_AEDAE [Q1DGN2] SubName: Full=AAEL015564-PA  
{ECO:0000313|EMBL:EAT32311.1}; 59..73

MAFNGPSNNTSAASNTSDENDGARKKENLILLVAKDSNDKLNELFDKTLNRLPLQIPLRMRKLPDSF  
FKPPSSGSKSPSVSHSRENSADSAFGSGTTILGGVTTGPNGLPIHHSRAHSSPASLGKIPAGLVASINAANQQQQ  
QQSANNSSNVNSNKSQPGNVAGGGSGGDGPSASVQQQQAQQQAQQQSLTRQAILHSRGRSYDVSNQHAHYGELPP  
GWEQAKTQDGRIYYLK PLRMRKLPDSFFKPP

tr:A0A1Y9IVQ1\_9DIPT [A0A1Y9IVQ1] SubName: Full=Uncharacterized protein  
{ECO:0000313|VectorBase:AMIN015771-PA, ECO:0000313|VectorBase:AMIN015771-}

PB, ECO:0000313|VectorBase:AMIN015771-PC}; 70..84

MAFNNGGAAGGNGSAAGAVAAGAANNASDENEPTGANKKKNLIILVDKDSNDKLNELFDKTLNKLPLQI  
PYMRKLPESFFMPSSSGSKSPSVSHSRENSADSAFGSGTTILGGVTGVATGPNGLPIHHSRAHSSPASLGKIPV  
GLGGLGGGAVAAAAAAGGGNGTGGGGGGGGGGGAGNNGGASGSKTAVAVAQAAAAAQAQND  
SSLGAAVLQQAALSKAAIQHLHSRGRSYDVSNLHANFNGELPPGWQAKTQDGRIYYINHNTRTTWEDPRITAMQ  
ESLFQQQSSVETLFNTGSQTLLSPTISSPTPTNNVFPDITQMTNDNLAPSNAAPPASMLTGSSNVDLGLPLPDGW  
EEGITEKGERYYINHATRSTTWRDPRLSNQDWAVQEQTVRLYNLQLERERLRKRQOEIKSHMGDDPFLSGIADHT  
RQESGDSGLSESSMTQSMPTPEFLSSIDDSMDGLSMTDNTMDTIAFGDNLETPDEFMLDDPLLLEKIDAVTNLT  
LMDPTSSKAENTLYDII PYMRKLPESFFMP

tr:A0A336K5U7\_CULSO [A0A336K5U7] SubName: Full=CSON013516 protein  
{ECO:0000313|EMBL:SSW98968.1}; 801..815

MKLMVDGLEVYFPEYFIYPEQYAYMVELKKAIDAKGHCLLEMPSGTGKTTTLLSLIVAYMLNHPGVVRK  
LIYCSRTVPEIEKVMaelKILMDYEEKSTGQRPDLLGVVLTsrknlciHPEVSKEREGKLVDAKCYGLTASYVRE  
RHNMDSTSVQCYYEWWNEGKETMPPGIYSIDDLKVKVQTRTWCPYFMTRQAIVSAQIVVYSYHYLLDPKIAE  
VVSKELTKEsvivfDEAHNIDNVCIDSMSVKINKRIERSTTALGQLEKIVAevKEDDQNRLTeeYQRLVQGLRE  
ANVARETDMVLANPVLpNDVLKEVVPGNIRNAEHFLGFLRRFIEYIKIRLVRHVvQESPASFLKDVQqKVCIER  
KPLKfCAERLASLMRTLEITELHEYSSLTvITHFATLVSTYtQGFTIICEPFDDKTPSVSNPILYfSCLDSSIAM  
RAVfQRfQTVVITSGTLSPMEMYPKILDFNPavMASFTMTLARPCLLPMVvSRGNDQVAMSSKfETREDTAVIRN  
YGQLLVETAKAVPDGVVCFFTSYLYLESVVASWYDQgIVDTLLKYKLLFIETQDSAETSALMNYVKACEGRGA  
ILLAVSRGKVSEGVDFDHLGRAVLMFGIPYVYTQSRVLKARLDFLRDMFQIRENDFLTFDALRHAAQCVGRAIR  
GKTDYgIMIFADKRYARQDKRSKLPKWIQDHLTDNLINLSTEEAIQIAKRWLRQMAQPFcrDDQLGTALLTLdQL  
QNMEKEKLDsQVQVAAETESGNKKKNIIVVEKDSQDKLDELfNKALSnkVPLTVPLMRNLpDSFFNPPSSGS  
KSPSVSVSHSRENSADSAFGSGTTILGGVTSINGLPIHHSRAQSSPASLGIGINLPMGLNAGNTTSNATSKLAT  
GNNLNNNNNNNNNNPTTNTLGTPTTQKGFpNLHSRGRSYDVtNFQFGPLPEGWEQAKTEDGRIYYINHNRTTQW  
EDPRTMPTTSPPLFNsnSSVETLFNSNTTSPTNQTSTPANHEWAAHEQSLRLYNLQMERERLRRRQOEIKSHIGE  
TDPFLPGNLDTHTRQESGDSGLSLPSSSTSQSTSHTPDfLSNIDDSMDGLSDNTMDTmPFNDNIDNSDEFMLNDP  
LLLERFDADAVDNLISpannKTTGSNVFGI PLMRNLpDSFFNPP

tr:R7UUL4\_CAPTE [R7UUL4] SubName: Full=Uncharacterized protein  
{ECO:0000313|EMBL:ELU07602.1, ECO:0000313|EnsemblMetazoa:CapteP224020};  
101..115

MADESANLLNFVDNASSGIKLALDRPTGSKRKVNHRKYLQKNLKVSPeKKNsgDKVKAKKKKDCNPI  
GLQAKSLQELFDLRTLHEKCCTDPMQKTPRIPLRKRKLPPSFFSEPGTDVTKYQSCRYGSGVQRLTGWSQLPGSL  
SGYSDCRLSNQAVDPDISRMYYHGYQNYCASDSNKRQLNALDYSGYSQDAAYGYNPVSMTTDPPQGHnMLCSVP  
LTAMADFAFS PLRKRKLPPSFFSEP

tr:R7UVZ3\_CAPTE [R7UVZ3] SubName: Full=Uncharacterized protein  
{ECO:0000313|EMBL:ELU10793.1, ECO:0000313|EnsemblMetazoa:CapteP200232};  
115..129

MSAGGQgKRGASGPIASASDEEEQDPQSPVSTNTEPPAISPTLLDHDYENVSSPGNSSTASGPTYARQP  
GFTIHAHEITVSKVKKKSAIISVKEGVRrREPTPPKSKPKRDPLPMRMRALPQSFwQQPNIPHNVSPANAYPVL  
PPLYTREGEAVPDERPVTppGDEDPAKELVPTPPAPPPPPPPPPSTTSSHkPHATHVRIGERKITIANTDLLF  
KLFEgVEKAKSSPFPQLKRSRPRKFVPCSSKTFLSGEDPYLMecVTDKMFPHLSLEQSGGRAGSRNNYIVNLGMF  
CVLLVRVRVrTCTHARTHsyIPLTSQGGQGEWAKSSLPVENKTLKYG PMRMRALPQSFwQQP

tr:R7U458\_CAPTE [R7U458] SubName: Full=Uncharacterized protein  
{ECO:0000313|EMBL:ELT98461.1, ECO:0000313|EnsemblMetazoa:CapteP205574};  
212..226

MLTVSRRSSKdreIRQNLADETMTSkesIHDDVTGCEGASVCDRNHGNNNSVCAKDYERKRGNDemeFD  
EEDEDDIVCLVKMSSPKMSETSSKLLQFMdIVNGDIQKYFGTHGGSedSHRGMYDNQWEKQSGKELYAQLMRV  
AQGIDTDGDGGTskGSGVMNKKVGLGPLKELFEYGLKDYWVDPLSARKLKKLKKFRSSSGSVEDCCAPLKKRSLP  
QSFwSEPKGGIAKAPDFSDLLESWTGDEDKCLTE PLKKRSLPQSFwSEP

tr:A0A183MK24\_9TREM [A0A183MK24] SubName: Full=Uncharacterized protein  
{ECO:0000313|EMBL:VDP20854.1, ECO:0000313|WBParaSite:SMRZ\_0001640001-mRNA-  
1}; 38..52

MEGYDSRKPPSVRVTVLEDPNSSLQELFNpASQRQOVPLHQrNLPKSFFVPPGDVNDNSRLSKLNSVHS  
NERNSADfVVFHskANSSPAclDAALRTSVSANVPNHSHQKSLDVASKYKTEfSPDFAFSGSCSPGLFQgQRNSQ



QTALLYGPTMTFAISELPVGYDMAINESNQVYFLNHQTQETTWFDPRIPEKFQKWGMTPEEELQVHLRYAKQFLC  
TIPSSNLNVCVQQVGEFIKILYDMSAR PLHQRNLPKSFFVPP

tr:W5JNH1\_ANODA [W5JNH1] SubName: Full=Yorkie  
{ECO:0000313|EMBL:ETN64868.1}; 82..96

MAFNGSTPGVSGNGNAAAAAAAAAVAAVAVGASAGASEENDPTASATKKNLIILVDKDSNDKLNELF  
DKTLSNKLPLQIPYMRNLPESFFLPPSSGSKSPSVSHSRENSADSAFGSGTTILGGVVTVVTTGPNGLPIHHS  
RAHSSPASLGKIPAGLVGLGGGAVAAAAAAAAAAAAAAAAAGGGAGAGAGGGASVGGGGGGGAAAGTGTAAAAAAAASDA  
SSLGAAVLQQAALSKAAIQHLHSRGRSYDVSNLHVTFGELPPGWQAKTQDGRIYYINHNTRTTTWEDPRI TAMQ  
ESLFQQQSSVETLFTNTGSQTLLSPTISSPTPTPNVVPDAIQMTNEIVPPSNAAPPAAMLTGSNADLGPLPEGW  
EEGITEKGERYYINHATRSTTWRDPRLSNQDWAVQEQTVRLYNLQLERERLRKRQOEIKSHMGDDPFLSGIADHT  
RQESGDSGLSESSMTQSMPTPDFLSSIDDSMDGLSMTDNTMDTIAFGDNLETPDEFMLDDPLLLEKIDAVTNLN  
LIDPTSSKENTLYDII PYMRNLPESFFLPP

tr:A0A0P5H4F2\_9CRUS [A0A0P5H4F2] SubName: Full=65 kDa yes-associated  
protein {ECO:0000313|EMBL:JAK18483.1}; SubName: Full=Transcriptional  
coactivator YAP1 {ECO:0000313|EMBL:KZS19500.1}; 46..60

MSKNPEVVEHKERNQIVHIRGSDSELQALFDSVLKPDADRPLQLPFRLRNLPDSFFKPPPTGSKSPSV  
ASNSHSRENSTDSGHFALNPPSANIHHSRAHSSPASLQQTAAAGQQRPVHQHLKQQSCDLSLDHFPLPEGWEQA  
KTPQGGQVYFLNHLTQTTTTWEDPRKLLQQQIQPLSPAPPPNMVAPLLSAVTTTPVAGSNAAAVALAASQQALTQAL  
GPLPEGWEQAVTPEGELYFIDHHRKTSWFDPRLPPIHMOKPPMVHAAGAQSVAALQQQQQITQQPAASGTSQPTL  
TPAQAAQQQLRQLKQQEQDRLRQRQOEIIAMMERETRVRRQENNSGSQQQTEFAMRRNPLHSQSNSNSSAANEL  
SSNTADPFLSAASATTTAVVSHPCANGAGNGAATSIAQNSTVPPSSLATDFHARQESADSGLMGGSYSPLPHTPE  
DFLASMDTMDTTLDCN PFRLRNLPDSFFKPP

tr:A0A0P4WV48\_9CRUS [A0A0P4WV48] SubName: Full=65 kDa yes-associated  
protein {ECO:0000313|EMBL:JAI72949.1}; 46..60

MSKNPEVVEHKERNQIVHIRGSDSELQALFDSVLKPDADRPLQLPFRLRNLPDSFFKPPPTGSKSPSV  
ASNSHSRENSTDSGHFALNPPSANIHHSRAHSSPASLQQTAAAGQQRPVHQHLKQQSCDLSLDHFPLPEGWEQA  
KTPQGGQVYFLNHLTQTTTTWEDPRKLLQQQIQPLSPAPPPNMVAPLLSAVTTTPVAGSNAAAVALAASQQALTQAL  
GPLPEGWEQAVTPEGELYFIDHHRKTSWFDPRLPPIHMOKPPMVHAAGAQSVAALQQQQQITQQPAASGTSQPTL  
TPAQAAQQQLRQLKQQEQDRLRQRQOEIIAMMERETRVRRQENNSGSQQQTEFAMRRNPLHSQSNSNSSAANEL  
SSNTADPFLSAASATTTAVVSHPCANGAGNGAATSIAQNSTVPPSSLATDFHARQESADSGLMGGSYSPLPHTPE  
DFLASMDTMDTTLDCPASVGTVDMDMNDMNGGLETGDLPAHMDTDDLVPTLDLGEELSTDILNDVLLNSNKV  
DNVLTWL PFRLRNLPDSFFKPP

tr:A0A0P5Z9I2\_9CRUS [A0A0P5Z9I2] SubName: Full=65 kDa yes-associated  
protein {ECO:0000313|EMBL:JAM56754.1}; 46..60

MSKNPEVVEHKERNQIVHIRGSDSELQALFDSVLKPDADRPLQLPFRLRNLPDSFFKPPPTGSKSPSV  
ASNSHSRENSTDSGHFALNPPSANIHHSRAHSSPASLQQTAAAGQQRPVHQHLKQQSCDLSLDHFPLPEGWEQA  
KTPQGGQVYFLNHLTQTTTTWEDPRKLLQQQIQPLSPAPPPNMVAPLLSAVTTTPVAGSNAAAVALAASQQALTQAL  
GPLPEGWEQAVTPEGELYFIDHHRKTSWFDPRLPPIHMOKPPMVHAAGAQSVAALQQQQQITQQPAASGEDSSSL  
NSNASMHPCLYKDLVSIHKMVCVGTSPQTLTPAQAAQQQLRQLKQQEQDRLRQRQOEIIAMMERETRVRRQEN  
SGSQQQTEFAMRRNPLHSQSNSNSSAANELSSNTADPFLSAASATTTAVVSHPCANGAGNGAATSIAQNSTVPPS  
SLATDFHARQESADSGLMGGSYSPLPHTPEDFLASMDTMDTTLDCPASVGTVDMDMNDMNGGLETGDLPAHMD  
TTDDLVPPTLDLGEELSTDILNDVLLNSNKVDNVLTWL PFRLRNLPDSFFKPP

tr:A0A183NWX3\_9TREM [A0A183NWX3] SubName: Full=Uncharacterized protein  
{ECO:0000313|EMBL:VDP34829.1, ECO:0000313|WBParaSite:SMTD\_0000661801-mRNA-  
1}; 38..52

MEGYDSRKPSSVRVTVLEDPNSSLQELFNPASQRQQVPLHQRNLPKSFFVPPGVDNDSSRLSKLNSVHS  
NERNADVFVFSKANSSPACLDAALRTSVSANVPNHSHQKSLDVASKYKTEFSPDFAFGSCSPGLFQGRFDP  
RIPEKFQKWGMTPEEELQVHLRYAKQFLCTIPSSNLNVCVQQVGEFTKILYDMSAR PLHQRNLPKSFFVPP

tr:N6UDN5\_DENPD [N6UDN5] SubName: Full=Uncharacterized protein  
{ECO:0000313|EMBL:ENN76772.1, ECO:0000313|EnsemblMetazoa:ENN76772}; Flags:  
Fragment; 70..84

MKAGKGNCSLTGTVSSKGRKELWDSSVIMARNQDEAKQVVRVDQDSETDLQALFDSVLKPDSCRPLQV

PWSMRKLPDSFFTPPSTGSKSINHSRENSVDSAFDVSQVNSVPLQTAHHRHSSPASLQQTYAVGQQQPPAHHH  
IKQRSYDVASKSEDNTPLPPGWEQARTPEGQVYYLE PWSMRKLPDSFFTPP

tr:A0A1B0BZ43\_9MUSC [A0A1B0BZ43] SubName: Full=Uncharacterized protein  
{ECO:0000313|VectorBase:GPPI031037-PA, ECO:0000313|VectorBase:GPPI044830-  
PA}; 63..77

MSLSKSSANDENKCSVKTDSSSTTAKTSNNLVVRINQDSDENLQALFDSVLNPHESKRPLQVPPFRMRKL  
PNSFFNPPAASPKSPTVSHSRANSVDSAYDCGSQPNINQASVATSLSDLQSTTAVVQQPTTTAITQQQPPPPPE  
TQRLQICHSHRAHSSPASLQQSYNLHGNISSDATTSTFIQQQQQQGDSSTGAVAGTGFNTNMVGFATAAAAAGLNAN  
SIIIGLVNQANAGATGAGGPLQTYHMKQRSYDVISPIQLQNELGPLPPGWEQAKTNDGQIYYLNHTTKTTQWEDPR  
IQFKQQALNAAANARLNKTTGGNAASLLNGDLGPLEGWEQALTEGTVYFINHIDRTTSSWNDPRIPILFQKAV  
KAKNEMSWVNAVEVDKNDIFKQKTIQKPLNKHVSLHMDPFLSGDNHARQESSDGLSLSSNSFAVNTDFITHM  
DSSMDCISENGSIIDNLDTTLQLNNDNICMLNDVLSNPSTKPDNLEWYKLN PFRMRKLPSFFNPP

tr:A0A0K8WIZ1\_BACLA [A0A0K8WIZ1] SubName: Full=Protein yorkie  
{ECO:0000313|EMBL:JAI50805.1}; 59..73

MSLSKTVGSLNKGNAKEKSTSKESNNLVVRIDQSDNNLQALFDSVLNPTESKCPQVPPFRMRQLPESF  
FKPPATASRSPVAHSRANSADSAYDTGSQPNVSQGNISTSSVAAPVATITQPQVTANRLSISHSRAHSSPASLQ  
QTYNVHIGNVMETSACLQDGIGPVFTTGAVFPFPPSVNAGAAVRMEQGEQPVKDPANIQTFFHMKQRSYDVVSTIQ  
LQNELGPLPPGWEQAKTNDGQIYYLK PFRMRQLPESFFKPP

tr:A0A151XC60\_9HYME [A0A151XC60] SubName: Full=Yorkie like protein  
{ECO:0000313|EMBL:KYQ57976.1}; 46..60

MALNQDVDQLSKSNPVVRVDQNSESDLQALFDTVLKPDKRPLQVPLRLRNLPSFFNPPSTGSKSPSI  
SHSRENSADSAFGAAVPATPNGGSSVVAVAAAAAGLTVSHPRHSSPASLQQTYASAQQAPQHAPQHARHHHHQK  
QRSYDVISTVDDLGLPLPHGWEQARTPEGQIYFLNHLTRTTTWEPRKTAASVAVAVAVAEVSSEKSNALGPLPDG  
WEQARTAEGEYIFINHQTTRTTSWFDPRIPSHLQRTPASGAMLPQNWQLQQPTGIQSNQNLQACQKQKIRLQSLQL  
ERERLQKQQEIMRQQQEMMLRQSTTDAVMDPFLSGINEQHARQESADSGLGLSAYSILPQASDDFLNIDENMDS  
TSDGGAPMDTDLSTLSDNIDSTDDLPSLQLNEEFSTDILDDVQSLINPNTTKPENVLTLW  
PLRLRNLPSFFNPP

tr:A0A1A9WP76\_9MUSC [A0A1A9WP76] SubName: Full=Uncharacterized protein  
{ECO:0000313|VectorBase:GBRI026830-PA}; 63..77

MSLSKSSANDENKCSVKTDSSSTTAKTSNNLVVRINQDSDENLQALFDSVLNPSSESKRPLQVPPFRMRKL  
PNSFFNPPAASPKSPTVSHSRANSVDSAYDCGSQPNINQASVATSLSDLQSTTAVVQQPTATTITQQQPPPPPE  
TQRLQICHSHRAHSSPASLQQSYNLHGNISSDATTTFIQQQQQPQGDGTAATVTGTGFNTNMVGFATAAAAAGLN  
ANSIIIGLVNQANAAGATGAGGPLQTYHMKQRSYDVISPIQLQNELGPLPPGWEQAKTNDGQIYYLNHTTKTTQWE  
DPRIQFKQQALNAAANARLNKTTAGNAASLLNGDLGPLEGWEQALTEGTVYFINHIDRTTSSWNDPRIPLLFQ  
KAVKAKNEMSWVNAVEMDKNDIFKQKTVQKPLNKHVSLHMDPFLSGDNHARQESSDGLSLSSNSFAVNNDFI  
THMNSMDCISENGSIIDNLDTTLQLNNDNICMLNDVLSNPSTKPDNLEWYKLN PFRMRKLPSFFNPP

tr:A0A2M4BIW5\_9DIPT [A0A2M4BIW5] SubName: Full=Putative transcriptional  
coactivator yorkie {ECO:0000313|EMBL:MBW52972.1}; 85..99

MAFNQSPAGVSGNGGNAASAAAAAATAAVAVGGGASGAGASEENDPASATKKNLIILVDKDSNDKLN  
ELFDKTLNKLPLQIPYRMRNLPEFFLPPSSGSKSPSVSHSRENSADSAFGSGTTILGGVVTGVTGPNGLPIH  
HSRAHSSPASLGKIPAGLVGLGGGAVAAAAAAGGAGGAGAGGGGGGASAGGAGGGAATGTGAAGVKQ  
QQAQAAAAAASSDASSLGAAVLQQAALSKAAIQHLHSRGRSYDVSNLHVTFGELPPGWEQAK  
TQDGRIIYINHNTTRTTTWEPRITAMQESLQQSSVETLFNTGSQTLLSPTISSPTPTNNVFPDAIQMTNEIV  
PPSNAAPPAAMLTGSNADLGLPEGWEEGITEKGERYYINHATRSTTWRDPRLSNQDWAQEQTVRLYNLQLERE  
RLRKRQEQEIKSHMGDDPFLSGIADHTRQESGSLSESSMTQSMPTPDLSSIDDSMDGLSMTDNMTDIAFGD  
NLETPDEFMLDDPLLEKIDAVTNLNLIDPTSSKPEPNTLYDII PYRMRNLPEFFLPP

tr:A0A2M4BJ16\_9DIPT [A0A2M4BJ16] SubName: Full=Putative transcriptional  
coactivator yorkie {ECO:0000313|EMBL:MBW52973.1}; 85..99

MAFNQSPAGVSGNGGNAASAAAAAATAAVAVGGGASGAGASEENDPASATKKNLIILVDKDSNDKLN  
ELFDKTLNKLPLQIPYRMRNLPEFFLPPSSGSKSPSVSHSRENSADSAFGSGTTILGGVVTGVTGPNGLPIH  
HSRAHSSPASLGKIPAGLVGLGGGAVAAAAAAGGAGGAGAGGGGGGASAGGAGGGAATGTGAAGVKQ  
QQAQAAAAAASSDASSLGAAVLQQAALSKAAIQHLHSRGRSYDVSNLHVTFGELPPGWEQAK  
TQDGRIIYINHNTTRTTTWEPRITAMQESLQQSSVETLFNTGSQTLLSPTISSPTPTNNVFPDAIQMTNEIV

PPSNAAPPAAMLTGSNADLGPLPEGWEEGITEKGERYYINHATRSTTWRDPRLSNQDWAVQEQTVRLYNLQLERE  
RLRKRQOEIKSHMGDDPFLSGIADHTRQESGDSGLSESSMTQSMPTPDFLSSIDDSMDGLSMTDNTMDTIAFGD  
NLETPDEFMLDDPILLEKIDAVTNLNLIDPTSSKPEPTLYDII PYRMRNLPESFFLPP

tr:A0A2M4BIZ0\_9DIPT [A0A2M4BIZ0] SubName: Full=Putative transcriptional  
coactivator yorkie {ECO:0000313|EMBL:MBW53017.1}; 85..99

MAFNNGSPAGVSGNGGNAASAAAAA AVAAVAVGGGASGAGASEENDPASATKKNLIILVDKDSNDKLN  
ELFDKTLNKLPLQIPYRMRNLPESFFLPPSSGSKSPSVSHSRENSADSAFGSGTTILGGVVTGVTGPNGLPIH  
HSRAHSSPASLGKIPAGLVGLGGGAVAAAAAAGGAGGGGAGGGGGGASAGGATTGTGAAGVKQQQSA  
AQQQQQQNAAAAAASDASSLGA AVLQQAALSKAAIQHLHSRGRSYDVSNLHVTFGELPPGWEQAKTQDG  
RIYYINHNRTRTTTWEDPRITAMQESL FQQQSSVETLFNTG SQTLSSPTISSPTPTNNVVPDAIQMTNEIVPPSN  
AAPPAAMLTGSNADLGPLPEGWEEGITEKGERYYINHATRSTTWRDPRLSNQDWAVQEQTVRLYNLQLERERLRK  
RQOEIKSHMGDDPFLSGIADHTRQESGDSGLSESSMTQSMPTPDFLSSIDDSMDGLSMTDNTMDTIAFGDNLET  
PDEFMLDDPILLEKIDAVTNLNLIDPTSSKPEPTLYDII PYRMRNLPESFFLPP

tr:A0A2M4BJ40\_9DIPT [A0A2M4BJ40] SubName: Full=Putative transcriptional  
coactivator yorkie {ECO:0000313|EMBL:MBW52971.1}; 85..99

MAFNNGSPAGVSGNGGNAASAAAAA AVAAVAVGGGASGAGASEENDPASATKKNLIILVDKDSNDKLN  
ELFDKTLNKLPLQIPYRMRNLPESFFLPPSSGSKSPSVSHSRENSADSAFGSGTTILGGVVTGVTGPNGLPIH  
HSRAHSSPASLGKIPAGLVGLGGGAVAAAAAAGGAGGGGAGGGGGGASAGGAGGGGAATGTGAAGVKQ  
QQAQQQQQNAAAAAAASDASSLGA AVLQQAALSKAAIQHLHSRGRSYDVSNLHVTFGELPPGWEQAK  
TQDGRIYYINHNRTRTTTWEDPRITAMQESL FQQQSSVETLFNTG SQTLSSPTISSPTPTNNVVPDAIQMTNEIV  
PPSNAAPPAAMLTGSNADLGPLPEGWEEGITEKGERYYINHATRSTTWRDPRLSNQDWAVQEQTVRLYNLQLERE  
RLRKRQOEIKSHMGDDPFLSGIADHTRQESGDSGLSESSMTQSMPTPDFLSSIDDSMDGLSMTDNTMDTIAFGD  
NLETPDEFMLDDPILLEKIDAVTNLNLIDPTSSKPEPTLYDII PYRMRNLPESFFLPP

tr:A0A2M4BJQ2\_9DIPT [A0A2M4BJQ2] SubName: Full=Putative transcriptional  
coactivator yorkie {ECO:0000313|EMBL:MBW53018.1}; 85..99

MAFNNGSPAGVSGNGGNAASAAAAA AVAAVAVGGGASGAGASEENDPASATKKNLIILVDKDSNDKLN  
ELFDKTLNKLPLQIPYRMRNLPESFFLPPSSGSKSPSVSHSRENSADSAFGSGTTILGGVVTGVTGPNGLPIH  
HSRAHSSPASLGKIPAGLVGLGGGAVAAAAAAGGAGGGGAGGGGGGASAGGATTGTGAAGVKQQQSA  
AQQQQQQNAAAAAASDASSLGA AVLQQAALSKAAIQHLHSRGRSYDVSNLHVTFGELPPGWEQAKTQDG  
RIYYINHNRTRTTTWEDPRITAMQESL FQQQSSVETLFNTG SQTLSSPTISSPTPTNNVVPDAIQMTNEIVPPSN  
AAPPAAMLTGSNADLGPLPEGWEEGITEKGERYYINHATRSTTWRDPRLSNQDWAVQEQTVRLYNLQLERERLRK  
RQOEIKSHMGDDPFLSGIADHTRQESGDSGLSESSMTQSMPTPDFLSSIDDSMDGLSMTDNTMDTIAFGDNLET  
PDEFMLDDPILLEKIDAVTNLNLIDPTSSKPEPTLYDII PYRMRNLPESFFLPP

tr:A0A069DTH5\_9HEMI [A0A069DTH5] SubName: Full=Putative ww domain-  
containing transcription regulator protein 1  
{ECO:0000313|EMBL:JAC87066.1};>tr:A0A224XQR7\_9HEMI [A0A224XQR7] SubName:  
Full=Putative ww domain-containing transcription regulator protein 1  
{ECO:0000313|EMBL:JAW10790.1}; 44..58

MAGNPDVEFKSSLVVRIDQSDSELQALFDSVLKPGSKRPLQVPLMRKLPDSFFNPPSTGSKSPSVSS  
ISHSRENSADSAFGNATTTVSGLQVNHPRAHSSPASLQQT YASAQQTQPQHLKQRSYDITALDELGPLPPGWEQA  
RTSEGQVYFLNHITQTTTWEDPRKANAVAQQRASDLLNAAASSPGHSTSPQPHQAVHLQRAPSTTGALPSWLQPV  
VTQSQT LQATQKLRQLQSLQMERERLKRQOEIMRQQELMLRDAPATTGLDPFLPGVTDHSRQESADSGLGLGNS  
YSLPQTPDDFLTSMMDASVSDGGTASEMAGLDSHEITSLSDNIDSTDDLVP SLQLGEEFTSDILDDVQALINPT  
SKGGNSLTWL PLMRKLPDSFFNPP

tr:A0A212F1Y3\_DANPL [A0A212F1Y3] SubName: Full=YAP65 protein  
{ECO:0000313|EMBL:OWR47724.1}; 44..58

MALNSDGEQKSNLVLVRVDQSDSVLQSLFDTVLKPKSKRPLQVPLMRQLPKSFFNPPSTGSKSPSVSH  
SRENSADSAFGSSSATGTAPVSHSRAHSSPASLQQT YAAAGQONQOPPLPHQAKQRSYDVASHIPDELGLPAGW  
EQARTPEGQIYYLNHITKTTTWEDPRKTLAAQTVSAGVQHONEILTPPQTIAATPTAAKSTSTNTTDDPLGPLPD  
GWEQATTPEGEIYFINHAARTTSWFDPRIPQHLQRTPTSGGAAGGGWANAACQKLRQLQSLQLERERLKRQOEI  
RLQOELMARQSSSIVSSLATTEVSLDPFLSGISEHTRQESADSGLMVQYVSPHTPEDFLASMDRMDVASEPGA  
PMDADITLGD TDLLGDFTNDILDDVQSLINSTPNKPDNVLTWL PLMRQLPKSFFNPP

tr:A0A0D2WY30\_CAPO3 [A0A0D2WY30] SubName: Full=Uncharacterized protein  
{ECO:0000313|EMBL:KJE97763.1}; 48..62

MDTTGRGSTVDPLYAPVLPNRSQSESNQYHISQPSLDSLHSTLSMPPLRDRNLPASFFRSPSSAAADR  
IDSSAMSEAGASHSRDSSLDGIFVPHQPQLIMNGSTFPPVAFHSRQSSAGSSEPTSQSHNLQQQQLLLLQQQQ  
QQQQQLLYQQQQQLSLPQQSGQMPGQSPGLLVPMYNQLQHSYQTSQSSPFPATPSSAHSSTFFSREPSISSFL  
EMSLHFEQQQQPQQHSRPLSHNSGNVLSAQANNPGLPASGNSSNSLQRLSASSLDESPLPPGWEKGIKDGLPF  
FIDHNNKTTTTWVDPRTDRATPGTQGLSERKRPVDPVSDPLLNPNTLNPLPAGWEMAMHSDGIPYFINHRKRTTWTI  
DPRTDVIDMVEYFRNQTYSAATSVRRRDSGRSAHALSFGNGASPSAPGLENGPPSELRVHASTMTRISPRNTPFS  
SFDSALPDPGYDQMTGNSSPLASFNLTSPPPPSPGITGMDSQSLAGLSQRELQARRMMLQKEQIRLKQMQLLQE  
ELEIQRAQRNLAVLETTTRGGSAKLPPPQLTVSECLTTTTATATADVTSRRSVSDTSMPEPVVATKANRSSSTA  
GSTLYSPMQQLVLR LA PLRDRNLPASFFRSP

tr:A0A0K8TQ71\_TABBR [A0A0K8TQ71] SubName: Full=Uncharacterized protein  
{ECO:0000313|EMBL:JAI16537.1}; 59..73

MALNNSMNANNNNNNTIDSDAVKQGNLVVRIDQSDDDLQALFDSVLKPGDSKRPLQVPLHMRKLPKSF  
FNPPSNGSKSPSVSHSRANSTDSAFSTGSGAPPTAPPATNRGIQISHSRAHSSPASLQQTYAGSGMNAQNNNS  
TGSGSGTGGNATGNNGNATQGGQTNVQPVHMKQRSYDVVSAIQLODELGDLPPGWEQARTVEGQIYYLNHITRT  
TQWEDPRKQLAQQAALAQHQAESLLRSPIQQTADYLQRASSLTSRQETSNTNTNWNVIRNLEKEREYKQRQQ  
EIQHQDLLTRQNQQTMLQMDPFLSGITDHTRQESGDSGLSLSSNNF SVTPDFLSNIDDSMDCISESGNLDLGG  
LEGADDLVPSLQLGDNICTEMLNDVQSLINPVTTKPDNLNWFKI PLHMRKLPKSFNPP

tr:E9HCY1\_DAPPU [E9HCY1] SubName: Full=Uncharacterized protein  
{ECO:0000313|EMBL:EFX70433.1}; 46..60

MSKNPEVVEHKERNQIVHIRGDSSELQALFDSVLKPDADRPLQLPFRLRNLPDSFFKPPPTGSKSPSV  
ASNSHSRENSTDSGHFALNPSPSANIHHSRAHSSPASLQQTAAAGQQRVHQLKQQSCDLTLDHFPLPEGWEQA  
KTPQGQVYFLNHLTQTTTWEDPRKLLQQQIQPLSPAPPNMVAPLLSAVTAPVAGSNAAAVALAASQQALTQAL  
GPLPDGWEQAVTPEGELYFIDHHTRKTSWFDPRLPIHMQKPPMVHAAGTQSAAAALQQQQQITQQPAASGTSQQTL  
TPAQAAQQQLRLQRLQEQDRLRQRQEQEIIAMMERETRQESADSGLGMGGSYSLPHTPEDFLASMDTMDTLGPA  
SVGTVDMMNDMNDMNGGLEAGDLPAHMDTTDDLVPPTLDLGEELSTDILNDVLLNSNKVDNVLTLW  
PFRLRNLPDSFFKPP

tr:A0A0K8TQV3\_TABBR [A0A0K8TQV3] SubName: Full=Putative ww domain-  
containing protein {ECO:0000313|EMBL:JAI16536.1}; 59..73

MALNNSMNANNNNNNTIDSDAVKQGNLVVRIDQSDDDLQALFDSVLKPGDSKRPLQVPLHMRKLPKSF  
FNPPSNGSKSPSVSHSRANSTDSAFSTGSGAPPTAPPATNRGIQISHSRAHSSPASLQQTYAGSGMNAQNNNS  
TGSGSGTGGNATGNNGNATQGGQTNVQPVHMKQRSYDVVSAIQLODELGDLPPGWEQARTVEGQIYYLNHITRT  
TQWEDPRKQLAQQAALAQHQAESLLRSPIQQTATITVKDPAVTDPLGPLPEGWEQAVTSSGEIYFINHINRTTS  
WVDPRI SDYLQRASSLTSRQETSNTNTNWNVIRNLEKEREYKQRQQEIQHQDLLTRQNQQTMLQMDPFLSGI  
TDHTRQESGDSGLSLSSNNF SVTPDFLSNIDDSMDCISESGNLDLGGLEGADDLVPSLQLGDNICTEMLNDVQ  
SLINPVTTKPDNLNWFKI PLHMRKLPKSFNPP

tr:A0A1B6JRF0\_9HEMI [A0A1B6JRF0] SubName: Full=Uncharacterized protein  
{ECO:0000313|EMBL:JAT01791.1}; 45..59

MALNPDVEQLKGNLVVRIDQSDSELQALFDSVLKPDARRPLQVPPFRMRKLPNSFFNPPSTGSKSPSVS  
SISHSRENSADSAFGNNTTTTTTTTTGLQVNHPRAHSSPASLQQTYASAHQQQQQHIKQRSCDMTALQDLGPLPA  
GWEQARTLEGQVYFLNHITRTTTWEDPRKTIAAQVANQQQSAELLNTPHPATSPQPQKGSSPATSPAPLGPLP  
EGWEQAATPEGEIYFINHQTRTTSWFDPRIPTHLQRPPTSGALLPAALSSWLPQVQSSASQKLRQLQSLQLERER  
LKLRRQEQIMRQOELMMRQSTTDSGMDPFLSGLTDHARQESADSGLGMSNNYSLPHTPEDFLSTMDNMDGVSEGG  
TPGPADIALDSHEMTSLTDNIDSTDDLVPVSLQLGEEFSSDILDDVQALINPKVDNGLTWL  
PFRMRKLPNSFFNPP

tr:A0A026X1A6\_OOCBI [A0A026X1A6] SubName: Full=Protein yorkie  
{ECO:0000313|EMBL:EZA61144.1}; 46..60

MALNQDVEQLSKSNLVVRIDQNSESDLQALFDTVLKPKDSKRPLQVPLMRNLPESFFNPPSAGSKSPSI  
SHSRENSADSAFGAAVVATPNGGTERAGGGAGGAPTGAAGGGNAAGGGNAAGAAGTGGLTVAHPRAHSSPASL  
QQTYASAAQAPQHPAPQPHARHHHQKQRSYDVI STVDDLGLPLPHGWEQARTAEQIYFLK  
PLMRNLPESFFNPP

tr:A0A1B6J527\_9HEMI [A0A1B6J527] SubName: Full=Uncharacterized protein  
{ECO:0000313|EMBL:JAS94274.1}; 45..59

MALNPDVEQLKGNLVVRIIDQDSDELQALFDSVLKPDSSRRPLQVPPFRMRKLPNSFFNPPSTGSKSPSVS  
SISHSRENSADSAFGNNTTTTTTTTTGLQVNHPRAHSSPASLQOQTYASAHQQQQQHIIKQRSCDMTALDGLPLPA  
GWEQARTLEGQVYFLNHITRRTTTWEDPRKTIAAQVANQQQORSAELLNTPHPATSPQPQKGSSPATSPAPLGPLP  
EGWEQAATPEGEIYFINHQTRRTTSWFDPRIPHTLQRPPTSGALLPAALSSWLPQVQSSASQOQKLRQLQSLQLERER  
LKLRRQOQELMRQOELMMRQSTTDSGMDPFLSGLTDHARQESADSLGMSNNYSLPHTPEDFLSTMDDNMDGVSEGG  
TPGPADIALDSHEMTSLTDNIDSTDDLVPVSLQLAADDPIFPANIFGGSIL PFRMRKLPNSFFNPP

tr:A0A182FD52\_ANOAL [A0A182FD52] SubName: Full=Uncharacterized protein  
{ECO:0000313|VectorBase:AALB004439-PA}; 81..95

MAFNSTPGVSGNGNAASAAAAAVALAVAVGASAGASEENDPASATKKKNLIILVDKDSNDKLNELFD  
KTLNKNLPLQIPYRMRNLPESFFLPPSSGSKSPSVSHSRENSADSAFGSGTTILGGVVTGVTTPGNGLPIHHSRA  
HSSPASLGKIPASLVGLGSGAVAAAAAAGGGAGAGGGGGGGGASAGAAAAAGAGAGTAGAAGVKQQ  
QSAAQQQQNAAAAAASDASSLGAAVLQQAALSKAAIQHLHSRGRSYDVSNLHVTFGELPPGWEQAKTQ  
DGRIYYIK PYRMRNLPESFFLPP

tr:X5J6X0\_BLAG [X5J6X0] SubName: Full=Yorkie-S  
{ECO:0000313|EMBL:CCX34982.1};>gp:HF969253\_1 [HF969253] Yorkie-S [Blattella  
germanica] 45..59

MALNPDSEQHKGNLVVRIIDQSDSDLQALFDSVLKPDSSKRPLQVPLMRKLPNSFFNPPSTGSKSPSVS  
SISHSRENSADSAFGTASVAGGPGATTTTTSAASASGLQVNHPRAHSSPASLQOQTYASAQOQHQHSHLQORSY  
DITTVDELGPLPPGWEQARTPEGQVYFLNHITRRTTTWEDPRKTLAAQVAQSQOQOQTSADLISNVAGSPLSSSSP  
QPQGTQSVDAANLGPLPEGWEQATTQEGEVYFINHQTRRTTSWFDPRIPLOLQKSPANSMMMPQOQSSSWIQPLTSQ  
SLQACQOQKLRQLQSLQMERERLKLRRQOQELMRQEMMRQOQSTTDLPPGANSAGMDPFLSGPTDHSRQESADSLGMC  
SYSLPHTPEDFLANMDDNMDGVSEGGNPSDMATLDGPDISSLSNIDSTDDLVPVSLQLSEEFSSDILDDVQSLIN  
PNSRPGNGLTWL PLMRKLPNSFFNPP

tr:A0A2P8Z9J9\_BLAG [A0A2P8Z9J9] SubName: Full=Uncharacterized protein  
{ECO:0000313|EMBL:PSN53170.1}; 45..59

MALNPDSEQHKGNLVVRIIDQSDSDLQALFDSVLKPDSSKRPLQVPLMRKLPNSFFNPPSTGSKSPSVS  
SISHSRENSADSAFGTASVAGGPGATTTTTSAASASGLQVNHPRAHSSPASLQOQTYASAQOQHQHSHLQORSY  
DITTVDELGPLPPGWEQARTPEGQVYYLK PLMRKLPNSFFNPP

tr:A0A2P8Y267\_BLAG [A0A2P8Y267] SubName: Full=Uncharacterized protein  
{ECO:0000313|EMBL:PSN38352.1}; 121..135

MSGKRKPSPEFTLTSLSPLLLTDEDTDVGGGKNKDTLRSARLQRPQKQKAVLGVRSRFTDSSDCDESTS  
SASSETPLPRPPGFSLTIGTTKKKKDDAPDI IKKTDPSPSKQKPKKEPLPMKLRALPQSFQQPNQTNCLSPG  
AVYPILPPLSSLGTTKDDVENIAAGMRSTASPEEQAPREVSVANTDLLFSLFRTVEDETPKVAVVLAMVSLKD  
GDKSVSLPSLNVEHNYSQILSELVIKL PMKLRALPQSFQQP

tr:A0A1B6DK87\_9HEMI [A0A1B6DK87] SubName: Full=Uncharacterized protein  
{ECO:0000313|EMBL:JAS26104.1}; 45..59

MALNQDVEQLQGNLVVRIIDQDSDELQALFDSVLKPDSSKRPLQVPPFRMRKLPNSFFNPPSTGSKSPSVS  
SISHSRENSADSAFGTTTTTTTTASGLQVNHPRAHSSPASLQOQTYASAHQQQQHQHHLKQRSYDITALDELGPLPP  
GWEQARTPEGQVYFLNHVTRRTTTWEDPRKTLAAQVQVQOQORSAELLNTPVATSPHPSSSPQPQAAHLQRTPGAGSV  
LPQGLSSWIQPTIQVCQOQKLRQLQSLQMERERLKMRRQOQELMRQOQSSADGASSGMDPFLSGLTDHRSRQES  
ADSLGGMGNNYSLPHTPEDFLSTMDDNMDGVSEGGTPGPDMSALDSHDMTSLSDNIDSTDDLVPVSLQLAEEDPIF  
AANIFGGSIL PFRMRKLPNSFFNPP

tr:A0A1B6BY62\_9HEMI [A0A1B6BY62] SubName: Full=Uncharacterized protein  
{ECO:0000313|EMBL:JAS06213.1}; 45..59

MALNQDVEQLQGNLVVRIIDQDSDELQALFDSVLKPDSSKRPLQVPPFRMRKLPNSFFNPPSTGSKSPSVS  
SISHSRENSADSAFGTTTTTTTTASGLQVNHPRAHSSPASLQOQTYASAHQQQQHQHHLKQRSYDITALDELGPLPP  
GWEQARTPEGQVYFLNHVTRRTTTWEDPRKTLAAQVQVQOQORSAELLNTPVATSPHPSSSPQPQAAHLQRTPGAGSV  
LPQGLSSWIQPTIQVCQOQKLRQLQSLQMERERLKMRRQOQELMRQOQSSADGASSGMDPFLSGLTDHRSRQES  
ADSLGGMGNNYSLPHTPEDFLSTMDDNMDGVSEGGTPGPDMSALDSHDMTSLSDNIDSTDDLVPVSLQLGEEFSSD  
ILDDVQALINPNIKSDNVLTWL PFRMRKLPNSFFNPP

tr:A0A1B6DRS0\_9HEMI [A0A1B6DRS0] SubName: Full=Uncharacterized protein {ECO:0000313|EMBL:JAS28313.1}; 45..59

MALNQDVEQLQGNLVVRIIDQDSSELQALFDSVLKPDSCRPLQVPFRMRKLPNSFFNPPSTGSKSPSVS  
SISHSRENSADSAFGTTTTTTTTASGLQVNHPRAHSSPASLQQTYASAAQQQQHQHQLKQRSYDITALDELGLPLPP  
GWEQARTPEGQVYFLNHVTRTTTTWEDPRKTLAAQVQNQQQSAELLNTVATSPHPSSSPQPQGTGKGTLSPATSP  
APLGPLPEGWEQAATPEGEIYFINHQTRTTTSWFDPRIPAHLQRTPGAGSVLPQGLSSWIQPTIQVCQQKLRQLS  
LQMERERLKMRRQEIIMRQQELMLRQSSADGASSGMDPFLSGLTDHSRQESADSGLGMGNYSLPHTPEDFLSTMD  
DNMDGVSEGGTGPDPMSALDSDHMTSLSDNIDSTDDLVPVSLQLGEEFSSDILDDVQALINPNIKSDNVLTWL  
PFRMRKLPNSFFNPP

tr:A0A1B6D5S2\_9HEMI [A0A1B6D5S2] SubName: Full=Uncharacterized protein {ECO:0000313|EMBL:JAS20915.1}; 45..59

MALNQDVEQLQGNLVVRIIDQDSSELQALFDSVLKPDSCRPLQVPFRMRKLPNSFFNPPSTGSKSPSVS  
SISHSRENSADSAFGTTTTTTTTASGLQVNHPRAHSSPASLQQTYASAAQQQQHQHQLKQRSYDITALDELGLPLPP  
GWEQARTPEGQVYFLNHVTRTTTTWEDPRKTLAAQVQNQQQSAELLNTVATSPHPSSSPQPQGTGKGTLSPATSP  
APLGPLPEGWEQAATPEGEIYFINHQTRTTTSWFDPRIPAHLQRTPGAGSVLPQGLSSWIQPTIQVCQQKLRQLS  
LQMERERLKMRRQEIIMRQQELMLRQSSADGASSGMDPFLSGLTDHSRQESADSGLGMGNYSLPHTPEDFLSTMD  
DNMDGVSEGGTGPDPMSALDSDHMTSLSDNIDSTDDLVPVSLQLAEEEDPIFAANIFGGSIL  
PFRMRKLPNSFFNPP

tr:X5J6P8\_BLAG [X5J6P8] SubName: Full=Yorkie-L {ECO:0000313|EMBL:CCX34981.1};>gp:HF969252\_1 [HF969252] Yorkie-L [Blattella germanica] 45..59

MALNPDSEQHKGNLVVRIIDQDSDDLQALFDSVLKPDSCRPLQVPLMRKLPNSFFNPPSTGSKSPSVS  
SISHSRENSADSAFGTASVAGGPGATTTTTSAASASGLQVNHPRAHSSPASLQQTYASAAQQQQHQHSHLQKRSY  
DITTVDELGLPLPPGWEQARTPEGQVYFLNHITTTTTWEDPRKTLAAQVAQSQQQQQTSADLISNVAGSPLSSSSP  
QPQGTKSVDAANLGLPLPEGWEQATTQEGEVYFINHQTRTTTSWFDPRIPTAMWSRTAIPSLVQRMVLRRLSANQTL  
QLQKSPANSSMMPQQSSSWIQPLTSQSLQACQKLRQLSLOMERERLKLRRQEIIMRQEMMMRQQSTTDLPPGANS  
AGMDPFLSGPTDHSRQESADSGLGMCSYSLPHTPEDFLANMDDNMDGVSEGGNPSDMATLDGPDISSLSDNIDST  
DDLVPVSLQLSEEFSSDILDDVQSLINPNRSRPGNLTWL PLRMRKLPNSFFNPP

tr:A0A1E1X4E4\_9ACAR [A0A1E1X4E4] SubName: Full=Putative transcriptional coactivator {ECO:0000313|EMBL:JAT94124.1}; Flags: Fragment; 47..61

ATNGRGELIEQKGNHIVRIRSDSDINLDDLKAVMQPGRVPLSVPMLRLNLPASFFQQPERSKSASH  
SRESSSDATFSPASEATAAAAAAAAAAAAAAAAAAPPVSLPVNHPRAHSSPASLQQSYNAPSPQHLRQQSYDLADDLPPG  
WEMAKTSTGQRYFLNHLTQTTTTWDDPRKKSPTKHHATPPPPHTAAPAAGQFKNLGPLPDGWEQATTAEGEVYF  
INHIERTTSWFDPRIPAHAQKPLLHSPASQLPLHPQNQQGSGNAVSSSTGPTSPDPMNSISAVVAATSSLTIQQR  
QQKMLRQLQOMERERLKRIRQEIILRQTAFLGNSTRNEMLLRRTLTEEILPSPTSPTASDVAGVGPTTDPFLGGDF  
HSRQESADSGLGLPNYSLPHTPEDFLSSMDDSIDAGLNDDPNHQNSSELSLDGLQGTGIDLGTENMDSDDLVPVSL  
QEELQGDLLSDMEALLTSSKDSVLTWL PMRLRNLNPASFFQQP

tr:A0A2M4A1L2\_9DIPT [A0A2M4A1L2] SubName: Full=Putative transcriptional coactivator yorkie {ECO:0000313|EMBL:MBW34704.1}; 81..95

MAFNSTPGVSGNGGNAAAAAAAAAAVAAVAVGASAGANEENDPASATKKNLIIILVDKDSNDKLNELFD  
KTLNKLPLQIPYMRNLPEFFLPPSSGSKSPSVSHSRENSADSAFGSGTTILGGVTGVTTGPNGLPIHHSRAH  
SSPASLGIKIPAGLVGLGGGAVAAAAAAAAAAAAAAAAAGGGTSAGAGGAGASAGGAGGAAGSGTGAAGVNGKVQQQSAA  
QQQNAAAAAAAAAAAAASDASSLGAAVLQQAALSKAAIQHLHSRGRSYDVSNLHVTFGELPPGWEQAKTQDGRYI  
YINHNTRTTTTWEDPRITAMQESLFQQQSSVETLFTNTGSQTLTSSPTPTNNVVFDAIQMTNEIVPPSNAAP  
PAAMLTGSNADLGLPLPEGWEEGITEKGERYYINHATRSTTWRDPRLSNQDQWAVQEQTVRLYNLQLERERLKRQQ  
EIKSHMGDDPFLSGIADHTRQESGDSGLSESSMTQSMPTPDLSSIDDSMDGLSMTDNTMDTIAFGDNLETPDE  
FMLDDPLLEKIDAVTNLNLIDPTSSKPDNTLYDII PYMRNLPEFFLPP

tr:A0A1B0A976\_GLOPL [A0A1B0A976] SubName: Full=Uncharacterized protein {ECO:0000313|VectorBase:GPAL038283-PA}; 63..77

MSLSKSSANDENKCSVKTTDDSSTTAKTSNNLVVRIIDQDSDENLQALFDSVLNPHESKRPLQVPFRMRKLP  
NSFFNPPAASPVSPTVSHSRANSVDSAYDCGSQPNINQASVATSLSDLQSTTAVVQQPTTTTTITQQQPPPPPE  
TQRLQICHSHRAHSSPASLQQSYNLHGGNISDDATNSFIQQQQQPQGDGSGTGTVAGTGFTNNMVGFTAAAAAAGLN  
ANSIIGLVNQANAGATGSGGALQTYHMKQRSYDVISPIQLQNELGLPLPPGWEQAKTNDGQIYYLNHTTKTTQWED  
PRIQFKQQALNAAANARLNKTTGGNAASLLNGDLGPLPEGWEQALTETGDVYFINHIDRTTSWNDPRIPILFQK

AVKAKNEMSWVNAVEVDKDNDFIKQKTIQKPLNKHNVSLHMDPFLSGDNHARQESSDSGLSLSSNSFAVNTDFIT  
HMDNMDCISENGSIIDNLDLTTLLQNDNICMLNDVLSNSTKPDNLEWYKLN PFRMRKLPNSFFNPP

tr:A0A2S2QZG0\_9HEMI [A0A2S2QZG0] SubName: Full=Yorkie  
{ECO:0000313|EMBL:MBY83063.1}; 72..86

MSGLQQQQQQQQQQEQVTIKMEPSDPSSPATAVAAAANNLVVRVDQDSETDLQALFDTVLKPDGKKPL  
QLPLRMRQLPKSFFNPPSTGSKSSSISHSRENSGDSAFGTAPSIGQSCVAGGGPGPMHSRAHSSPASLQQTYGVS  
AAKQQQQQHVQKRSYDVSSAIDELGPLPQGWEQARTPEGQIYFLNHLTRTTQWEDPRKSLAAQAAHQHRSAEQL  
LSPGNDSGSSTNATSTPTNSPPIHSTLQGTNKNVTLGPLPDGWEQAVTVDGETYFINHIARTTSWFDPRIPAHL  
QRAPTSGAVLPSGSASWLLNGGSGLSQSLQVTQKQLRLHSLQMERERLKLKQQEIIRQQELMLHSGQTTNDLDPF  
LSCSSSNVDHSRQESADSGLGGLGNNYSLPHTPEDFLSSNMDDNMDCTSESDNPGPSSDMSVVDVDSQEMASLDVTD  
LVPSLQLGDEFSDILDEVQSLIDPNKPGSILTWL PLRMRQLPKSFFNPP

tr:A0A182TU43\_9DIPT [A0A182TU43] SubName: Full=Uncharacterized protein  
{ECO:0000313|VectorBase:AMEC008342-PA}; 73..87

MAFNNGGAAGSGNGSAAAAAANAVAVAADENESTGANKKKNLIILVDKDSNDKLNELFDKALSINKVP  
LQIPYRMRKLPESFFMPPSSGSKSPSVSHSRENSADSAFGSGTTILGGVAGVAATGPNGLPIHHSRAHSSPASLG  
KIPVGMGGLGGGAVAAAAAANAAGNGAGGAGGGGGGGGGGGTGGTGAAGAASKSAAAQAAAAAQNDA  
TSLGAAVLQQAALSKAAIQHLHSRGRSYDVSNLHANFGEPPGWEQAKTQDGRIYYIK PYRMRKLPESFFMPP

tr:A0A2M3YY54\_9DIPT [A0A2M3YY54] SubName: Full=Putative transcriptional  
coactivator yorkie {ECO:0000313|EMBL:MBW21203.1}; 82..96

MAFNGSTPGVSGNGNAAASSAAAAAANAVAVAVGASAGAGEENDPASATKKNLIILVDKDSNDKLNELF  
DKTLSNKLPLQIPYRMRNLPEFFLPPSSGSKSPSVSHSRENSADSAFGSGTTILGGVTGVTGPNGLPIHHSRA  
HSSPASLGKIPAGLVGLGGGAVAAAAAANAAGGAGTGGGGGGGGGGGASAGGAGGGATGAAGTGAVGVKQ  
QSAAQQQNAVAAAAAANAASDASSLGAAVLQQAALSKAAIQHLHSRGRSYDVSNLHVTFGELPPGWEQAKT  
QDGRIYYINHNTRTTTTWEDPRITAMQESLFQQQSSVETLFTNTGSQTLLSPTISSPTPTNNVFPDAIQMTNEIVP  
PSNAAPPAAMLTGSNADLGLPEGWEEGITEKGERYYINHATRSTTWRDPRLSNQDWAQEQTVRLYNLQLERER  
LRKRQOEIKSHMGDDPFLSGIADHTRQESGDSGLSESSMTQSMPTPDLSSIDDSMDGLSMTDNTMDTIAFGDN  
LETPDEFMLDDPLLLEKIDAVTNLNLIDPTSSKPENTLYDII PYRMRNLPEFFLPP

tr:A0A0P6E261\_9CRUS [A0A0P6E261] SubName: Full=65 kDa yes-associated  
protein {ECO:0000313|EMBL:JAN25480.1}; 46..60

MSKNPEVVEHKERNQIVHIRGDSSELQALFDSVLKPDADRPLQLPFRLRNLPSFFKPPPTGSKSPSV  
ASNSHSRENSTDSGHFALNPSPSANIHHSRAHSSPASLQQTAAAGQORPVHQHLKQQSCDLSLDHFPLPEGWEQA  
KTPQGQVYFLNHLTQTTTTWEDPRKLLQQQIQPLSPAPPNMVAPLLSAVTPVAGSNAAAVALAASQQALTQAL  
GPLPEGWEQAVTPEGELYFIDHHRKTSWFDPRLPPIHMQKPPMVHAAGAQSVAALQQQQQITQQPAASGTSQPTL  
TPAQAAQQQLRLQKQQEQDRLRQRQQMERETRVRRQENNSGSQQQTEFAMRRNPLHSQSNSNSAANELSSNTA  
DPFLSAASATTTAVVSHPCANGAGNGAATSIAQNSTVPPSSLATDFHARQESADSGLMGGYSYSLPHTPEDFLAS  
MDDTMDTTLDCPASVGTVDMMNDMNDMNGGLETGDLPAHMDTTDDLVPPTLDLGEELSTDILNDVLLNSNKVDNVL  
WL PFRLRNLPSFFKPP

tr:A0A0A1WYQ7\_ZEUCU [A0A0A1WYQ7] SubName: Full=Protein yorkie  
{ECO:0000313|EMBL:JAD04199.1}; 61..75

MSLSKTVVSLNKGNAKEKERSTSKESNNLVVRIDQSDNNLQALFDSVLNPTESKCPQLQVFFRMRQLPE  
SFFKPPATASRSPVAHSRANSADSAYDTGSQPNVSQGNISTSSIAAVPATITQPQVTANRLSISHSRAHSSPAS  
LQQTYNIIGNVMETGACIQDGIGPVFTAGAVSFPPGVNAGSGVRMEQVDQSVTKDAPNTIQTFHMKQRSYDVVST  
IQLQNELGPLPPGWEQAKTNDGQIYYLNHTTKSTQWEDPRIQLKQIFQDGLSHNVNLKSKESVNLADNLGPLPE  
GWEQAYTESGDVYFINHVNRSTSWNDPRIPDFLQKPVKSQKPGPSWLNQIHIEKEQDYFKPSSEQSSLTRQNGSL  
QMDPFLSGDNHARQESSDSGLSLSSNTFSTTADLMPNIDDSMDCISESGSLNALSIGIDCPDNLVSSLQVMYNIKR  
HK PFRMRQLPESFFKPP

tr:A0A0P5X705\_9CRUS [A0A0P5X705] SubName: Full=65 kDa yes-associated  
protein {ECO:0000313|EMBL:JAM27120.1}; Flags: Fragment; 32..46

HFVHIRGDSSELQALFDSVLKPDADRPLQLPFRLRNLPSFFKPPPTGSKSPSVASNSHSRENSTDSG  
HFALNPSPSANIHHSRAHSSPASLQQTAAAGQORPVHQHLKQQSCDLSLDHFPLPEGWEQAKTPQGQVYFLNHLT  
QTTTTWEDPRKLLQQQIQPLSPAPPNMVAPLLSAVTPVAGSNAAAVALAASQQALTQALGPLPEGWEQAVTPE  
GELYFIDHHRKTSWFDPRLPPIHMQKPPMVHAAGAQSVAALQQQQQITQQPAASGTSQPTLTPAQAAQQQLRLQK  
LQQEQDRLRQRQQEIIAMMERETRVRRQENNSGSQQQTEFAMRRNPLHSQSNSNSAANELSSNTADPFLSAASA





GPLPEGWEQAVTPEGELYFIDHHRKTSWFDPRPLPIHMQKPPMVHAAGAQSVAALQQQQQITQQPAASGEDSSSL  
NSNASMHPCLYKDLVSIHKMVCVGT SQPTLTPAQAAQQQLRLQKLOQEQDRLRQRQOEIIAMMERETRVRRQENN  
SGSQQQTE PFRLRNLPDSFFKPP

tr:A0A0P5IC55\_9CRUS [A0A0P5IC55] SubName: Full=65 kDa yes-associated  
protein {ECO:0000313|EMBL:JAK36224.1}; 46..60

MSKNPEVVEHKERNQIVHIRGSDSELQALFDSVLKPDHRPLQLPFRLRNLPDSFFKPPPTGSKSPSV  
ASNSHSRENSTDSGHFALNPSANIHHSRAHSSPASLQQTAAAGQQRVPHQHLKQQSCDLSLDHFPLPEGWEQA  
KTPQGQVYFLNHLTQTTTWEDPRKLLQQQIQPLSPAPPNMVAPPLLSAVTTPVAGSNAAAFLAASQQALTQAL  
GPLPEGWEQAVTPEGELYFIDHHRKTSWFDPRPLPIHMQKPPMVHAAGAQSVAALQQQQQITQQPAASGTSQPTL  
TPAQAAQQQLRLQKLOQEQDRLRQRQXXXXXXXXXXXXXXXXXXXXXXXXXXXXXXXXXXXXPSSSLATDFHARQESADS  
GLGMGGSYSLPHTPEDFLASMDTMDTTLDCPASVGTVDMMNDMNDMNGGLETGDLPAHMDTDDDLVPTLDDLGEEL  
STDILNDVLLNSNKVDNVLTLW PFRLRNLPDSFFKPP

tr:A0A0P6ASK4\_9CRUS [A0A0P6ASK4] SubName: Full=65 kDa yes-associated  
protein {ECO:0000313|EMBL:JAM72512.1}; 46..60

MSKNPEVVEHKERNQIVHIRGSDSELQALFDSVLKPDHRPLQLPFRLRNLPDSFFKPPPTGSKSPSV  
ASNSHSRENSTDSGHFALNPSANIHHSRAHSSPASLQQTAAAGQQRVPHQHLKQQSCDLSLDHFPLPEGWEQA  
KTPQGQVYFLNHLTQTTTWEDPRKLLQQQIQPLSPAPPNMVAPPLLSAVTTPVAGSNAAAFLAASQQALTQAL  
GPLPEGWEQAVTPEGELYFIDHHRKTSWFDPRLRKEIFYFMFFLLSFCFLSFCFLSFCFLFFYLFFYLFFYLFFYLFFL  
LLLLNLLLLLLLLLLLLSPFAMTFTFSPIIAIHMQKPPMVHAAGAQSVAALQQQQQITQQPAASGEDSSSLNSNASM  
HPCLYKDLVSIHKMVCVGT SQPTLTPAQAAQQQLRLQKLOQEQDRLRQRQOEIIAMMERETRVRRQENNSGSQQQ  
TEFAMRRNPLHSQSNSNSAANELSSNTADPFLSAASATTTAVVSHPCANGAGNGAATSIAQNSTVPPSSLATDF  
HARQESADSGLMGGSYSLPHTPEDFLASMDTMDTTLDCPASVGTVDMMNDMNDMNGGLETGDLPAHMDTDDDLV  
PTLDDLGEELSTDILNDVLLNSNKVDNVLTLW PFRLRNLPDSFFKPP

tr:A0A0P5TJ82\_9CRUS [A0A0P5TJ82] SubName: Full=65 kDa yes-associated  
protein {ECO:0000313|EMBL:JAL76676.1}; 46..60

MSKNPEVVEHKERNQIVHIRGSDSELQALFDSVLKPDHRPLQLPFRLRNLPDSFFKPPPTGSKSPSV  
ASNSHSRENSTDSGHFALNPSANIHHSRAHSSPASLQQTAAAGQQRVPHQHLKQQSCDLSLDHFPLPEGWEQA  
KTPQGQVYFLNHLTQTTTWEDPRKLLQQQIQPLSPAPPNMVAPPLLSAVTTPVAGSNAAAFLAASQQALTQAL  
GPLPEGWEQAVTPEGELYFIDHHRKTSWFDPRPLPIHMQKPPMVHAAGAQSVAALQQQQQITQQPAASGTSQPTL  
TPAQAAQQQLRLQKLOQEQDRLRQRQOEIIAMMERETRVRRQENNSGSQQQTEFAMRRNPLHSQSNSNSAANEL  
SSNTADPFLSAASATTTAVVSHPCANGAGNGAATSIAQNSTVPPSSLATDFHARQESADSGLMGGSYSLPHTPE  
DFLASMDTMDTTLDCPASVGTXXXXXXXXXXXXXXXXXXXXXXXXXXXXPKIFWPLWMTQWTLPSIVLLL  
PFRLRNLPDSFFKPP

tr:A0A0P6D628\_9CRUS [A0A0P6D628] SubName: Full=65 kDa yes-associated  
protein {ECO:0000313|EMBL:JAN12140.1}; Flags: Fragment; 46..60

MSKNPEVVEHKERNQIVHIRGSDSELQALFDSVLKPDHRPLQLPFRLRNLPDSFFKPPPTGSKSPSV  
ASNSHSRENSTDSGHFALNPSANIHHSRAHSSPASLQQTAAAGQQRVPHQHLKQQSCDLSLDHFPLPEGWEQA  
KTPQGQVYFLNHLTQTTTWEDPRKLLQQQIQPLSPAPPNMVAPPLLSAVTTPVAGSNAAAFLAASQQALTQAL  
GPLPEGWEQAVTPEGELYFIDHHRKTSWFDPRLRKEIFYFMFFLLSFCFLSFCFLSFCFLFFYLFFYLFFYLFFYLFFL  
LLLLNLLLLLLLLLLLLSPFAMTFTFSPIIAIHMQKPPMVHAAGAQSVAALQQQQQITQQPAASGTSQPTLTPAQAAQQQL  
RLQKLOQEQDRLRQRQOEIIAMMERETRVRRQENNSGSQQQ PFRLRNLPDSFFKPP

tr:A0A0P5GW87\_9CRUS [A0A0P5GW87] SubName: Full=Putative 65 kDa yes-  
associated protein {ECO:0000313|EMBL:JAK16128.1}; Flags: Fragment;  
46..60

MSKNPEVVEHKERNQIVHIRGSDSELQALFDSVLKPDHRPLQLPFRLRNLPDSFFKPPPTGSKSPSV  
ASNSHSRENSTDSGHFALNPSANIHHSRAHSSPASLQQTAAAGQQRVPHQHLKQQSCDLSLDHFPLPEGWEQA  
KTPQGQVYFLNHLTQTTTWEDPRKLLQQXXXXXXXXXXGNSAAAFLAASQQALTQALGPLPEGWEQAVTPEGELYF  
IDHHRKTSWFDPRPLPIHMQKPPMVHAAGAQSVAALQQQQQITQQPAASGTSQPTLTPAQAAQQQLR  
PFRLRNLPDSFFKPP

tr:A0A0N8CTS7\_9CRUS [A0A0N8CTS7] SubName: Full=65 kDa yes-associated  
protein {ECO:0000313|EMBL:JAM04084.1}; 46..60

MSKNPEVVEHKERNQIVHIRGSDSELQALFDSVLKPDHRPLQLPFRLRNLPDSFFKPPPTGSKSPSV  
ASNSHSRENSTDSGHFALNPSANIHHSRAHSSPASLQQTAAAGQQRVPHQHLKQQSCDLSLDHFPLPEGWEQA



EMAKTSTGQRYFLNHLTQTTTWDDPRKKTTPSTKHHATPPPPHTAAPPAGPFKNLGPLPDGWEQATTAEGEVYFI  
NHIERTTSWFDPRIPAHAQKPLLQSHASQLPGHQOSQSGNAVNSTGPASPDTMNSISAVVAATSSLTQQQRQQ  
KMRLQQLQMERERLKRQQEILRQTAFLGNSARNEMMLRRTLTEEILPSPTSPTASDVVGVGPTTDFLGGDFHS  
RQESADSGLGLGNYSLPHTPEDFLSSMDDSIDAGLNDDPNHQNSELSLDGLQGTGIDLGTENMDSDDLVP SLQE  
ELQGDLLSDMEALLTSSKDSVLTWL PMRLRNL PASFFQQP

tr:A0A1Z5L713\_ORNMO [A0A1Z5L713] SubName: Full=ATP synthase-coupling  
factor 6 mitochondrial ATPase subunit F6 {ECO:0000313|EMBL:JAW02844.1};  
Flags: Fragment; 52..66

MSSQQQQQSNRDVIEQKGNHIVRIRSDSDINLDDLKAVMQPSNRVPLSVPMRLRNL PASFFQQPERS  
KSASHSRESSNDATFPDTAGQTPLPI SHPRAHSSPASLQRTYSSPQQQPPQHLRQRSYDLADEGSLPPGWEMAKT  
ASGQRYFLNHLTQTTTWEDPRKKTTPGGPKQQTAPPPHTAAPVLPNFKDLGPLPDGWEQATTAEGEVYFINHIER  
TTSWFDPRIP IHLQKPSLQGTSAQPTQGNTDISAVVAATSSLTQQQRQQKRLRQQLQREERERLKRFRHEILRQT  
AFLGNPARNQEMLVRRRTLTEEILSNPTSPSDPFLGGDFHTRQESADSGLGLGPSLPHTPEDFLSTMDDDSTMDGLN  
DDASQRDMSLES LQGT AIDLGAENMDSDDLVP SLQEELQGDLLSDMEALLTSSKDSVLTWL  
PMRLRNL PASFFQQP

tr:A0A293M1B4\_ORNER [A0A293M1B4] SubName: Full=YAP65-like protein  
{ECO:0000313|EMBL:MAA33871.1}; Flags: Fragment; 50..64

MSSQPPNSRDVIEQKGNHIVRIRSDSDINLDDLKAVMQPSNRVPLSVPMRLRNL PASFFQQPERSKS  
ASHSRESSSDATFPETTGP AISHPRAHSSPASLQQT YNNPPQQQHLRQRSYDLADEGSLPPGWEMAKTATGQRYF  
LNHLTQTTTWEDPRKKSPPGGTKQQT P P P P PHTAAPVLP HFKNLGPLPDGWEQATTSEGEVYFINHIERTTSWFD  
RIP IHLQKPSIQGTSAPPTQGTADISAVVAATSSLTQQQRQQKRLRQQLQREERERLKRQQEILRQTAFLGNPA  
RNQEMLLRRTLTEEILSNPTSPSDPFLGGDFHTRQESADSGLGLGPSLPHTPEDFLSTMDDDSTMDGLNDDASQRD  
VSLES LQGTGLDLGTENMDSDDLVP SLQEELQGDLLSDMEALLTSSKDSVLTWL PMRLRNL PASFFQQP

tr:A0A293LX93\_ORNER [A0A293LX93] SubName: Full=Uncharacterized protein  
{ECO:0000313|EMBL:MAA32388.1}; Flags: Fragment; 34..48

MTSPPPGETAQRLSDEKSDSTSSADDRDLFPFLPLRLRQLPASFWQEPKTPAATSSCSLYPPQEYSCT  
QYCP LCPACSFYPGFSLPPIYLIPIERVPIPYSVRELVPAVALPDMYQMGSSSTRGHRTRRSSRYHPML  
PLRLRQLPASFWQEP

tr:A0A293MZB2\_ORNER [A0A293MZB2] SubName: Full=YAP65-like protein  
{ECO:0000313|EMBL:MAA45268.1}; Flags: Fragment; 50..64

MSSQPPNSRDVIEQKGNHIVRIRSDSDINLDDLKAVMQPSNRVPLSVPMRLRNL PASFFQQPERSKS  
ASHSRESSSDATFPETTGP AISHPRAHSSPASLQQT YNNPPQQQHLRQRSYDLADEGSLPPGWEMAKTATGQRYF  
LNHLTQTTTWEDPRKKSPPGGTKQQT P P P P PHTAAPVLP HFKNLGPLPDGWEQATTSEGEVYFINHIERTTSWFD  
RIP IHLQKPSIQGTSAPPTQGTADISAVVAATSSLTQQQRQQKRLRQQLQREERERLKRQQEILRQQEMLLRRT  
LTEEILSNPTSPSDPFLGGDFHTRQESADSGLGLGPSLPHTPEDFLSTMDDDSTMDGLNDDASQRDVSLES LQGTG  
LDLGTENMDSDDLVP SLQEELQGDLLSDMEALLTSSKDSVLTWL PMRLRNL PASFFQQP

tr:A0A182PJT4\_9DIPT [A0A182PJT4] SubName: Full=Uncharacterized protein  
{ECO:0000313|VectorBase:AEPI007200-PA}; 74..88

MAFNNGGAGNGGGSAASAAAAA AVAAGSAPT DENEPTGASKKKNL IILVDKDSNDKLNELFDKTL SNKL  
PLQIPYRMRKLPESFFMPPSSGSKSPSVSHSRENSADSAFGSGTTILGGVTGVATGPNGLPIHHSRAHSSPASLG  
KIPVGLGGLGGGAVAAAAA AAAAAAAGNGTGAAGGGGGGGSSGGGGSGGTGAGKAAQAAAAA QNDASSLGAA  
VLQQAALSKAAIQHLHSRGRSYDVSNLHANFNGELPPGWEQAKTQDGRIYYIK PYRMRKLPESFFMPP

tr:A0A2P2ID39\_9CRUS [A0A2P2ID39] SubName: Full=Transcriptional  
coactivator YAP1-like {ECO:0000313|EMBL:LAB71856.1}; Flags: Fragment;  
62..76

FLLNAVIGSPLTMDTTENDDKLVGEPQKGSVHLVHRADSDSELQALFDCVLKPSKQMP LQKPFKMRNL P  
ASFFNPPAHRQSPAPT VSHSRESSADSTYGGGGPPGLRVGGAMSPAGIQPPPAPQHFRHHSSPATLQQTFAVAQT  
TPIGGHAKQHSYDALAEDTSPLPDGWEQARTPQQQLYYL PFKMRNL PASFFNPP

tr:H9J2E4\_BOMMO [H9J2E4] SubName: Full=Uncharacterized protein  
{ECO:0000313|EnsemblMetazoa:BGIBMGA003681-TA}; 44..58

MALNSDGEQKSNLVL RVDQDSV LQSLFDTVLKPD SKRPLQVPLRMRQLPKSFFNPPSTGSKSPSVSH

SRENSADSAFGSSSATGTSTVSHSRAHSSPASLQOQTYTAGQQSQQPPLHHQHTKQRSYDVGTHIPDDLGPLPAGW  
EQARTPEGQIYYLK PLRMRQLPKSFFNPP

tr:W6FTH1\_BOMMO [W6FTH1] SubName: Full=YKI2  
{ECO:0000313|EMBL:AHJ26003.1};>gp:KF904340\_1 [KF904340] YKI2 [Bombyx mori]  
44..58

MALNSDGEQKSNLVLVRVDQSDSVLQSLFDTVLKPDSCRPLQVPLRMRQLPKSFFNPPSTGSKSPSVSH  
SRENSADSAFGSSSATGTSTVSHSRAHSSPASLQOQTYTAGQQSQQPPLHHQHTKQRSYDVGTHIPDDLGPLPAGW  
EQARTPEGQIYYLNHITKTTTWDDPRKTLAAQNVANTVQHQAEEALLNQAQQTITNTATPAQHLQRTPVGATGV  
AGGGWANASTQACQQLRLQSLQLERDLKQRQOEIRLQOELMARQASSIVSSLASSTGAVASTELPLDFPLPGL  
TDHQRQESADSGLMAVPQSYMPHTPEDFLSGMDDRMDCSTSEAGANMDSTDITLGDNIGSTDDLLNEFTNDILL  
DDVQSLINSTPSKPDNVLTWL PLRMRQLPKSFFNPP

tr:W6FGB5\_BOMMO [W6FGB5] SubName: Full=YKI1  
{ECO:0000313|EMBL:AHJ26002.1};>gp:KF904339\_1 [KF904339] YKI1 [Bombyx mori]  
44..58

MALNSDGEQKSNLVLVRVDQSDSVLQSLFDTVLKPDSCRPLQVPLRMRQLPKSFFNPPSTGSKSPSVSH  
SRENSADSAFGSSSATGTSTVSHSRAHSSPASLQOQTYTAGQQSQQPPLHHQHTKQRSYDVGTHIPDDLGPLPAGW  
EQARTPEGQIYYLNHITKTTTWDDPRKTLAAQNVANTVQHQAEEALLNQAQQTITNTATPAAKSTSNTTDPLG  
PLPEGWEQATTAEGEIIYSINHAARTTSWFDPRIPQHLQRTPVSATGVAGGGWANASIQACQQLRLQSLQLERDR  
LKQRQOEIRLQOELMARQASSIVSSLASSTGAVASTELPLDFPLPGLTDHQRQESADSGLMAVPQSYMPHTPE  
DFLSGMDDRMDCSTSEAGANMDSTDITLGDNIGSTDDLLNEFTNDILLDDVQSLINSTPSEPDNVLTWL  
PLRMRQLPKSFFNPP

tr:A0A182KPB2\_9DIPT [A0A182KPB2] SubName: Full=Uncharacterized protein  
{ECO:0000313|VectorBase:ACOM024764-PA}; 74..88

MAFNNGAAGSGNGSAAAAAAAAAAVAVAADENESTGANKKKNLIILVDKDSNDKLNELFDKALS NKV  
PLQIPYRMRKLPESFFMPPSSGSKSPSVSHSRENSADSAFGSGTTILGGVAGVAATGPNGLPPIHHSRAHSSPASL  
GKIPGGMSGLGGGAXXXXXXXXXIVLQVGGKNQGLPTRRQFGGFVEDEMOKVCISLSRFM  
PYRMRKLPESFFMPP

tr:A0A087UBV3\_9ARAC [A0A087UBV3] SubName: Full=Yorkie-like protein  
{ECO:0000313|EMBL:KFM74842.1}; Flags: Fragment;47..61

MSQQRDVIEQQGPNQIVRIRSDSGTNLDDLKAVMEPKGNQVHQSI PMRLRNLPSPFFQQPERGSKSAS  
HSRESSTDNTYSSPPPQVSNQNNSSNNVNTSSNQGNNSVSSPPPQHPSGLPINHPRAHSSPASLQOQTYTNAS  
QHQLRQOQSYDITDSIPLPLGWERAKTATGQLYFLNHLTKTTTWEDPRKLSLGLSNSSGITCSPSTSPASSI  
LNVQNLGPLPEGWDQATTAEGEVVYINHKTRTTSWYDPRIPIQLOQPPLVPI LGYGSVTGQSQNPVSLSGQQTQS  
SVVTSGSGASVLPPLSSQTLQOQQQNLRLQRLQMERERLRLRQOEILREEMMRRTLREEGSLPTSPTNSSSDGTS  
STHTNIDPFLGGSDSFHSRQESGDSGLGLGTNYSLPNTPEDYLMGMEEGAEDVLLDIAELNLEPIPGAALGIVPE  
NMDSEDLVPSLQEEFNADILSDVEAILTKESGMKWL PMRLRNLPSPFFQQP

tr:A0A087U4J8\_9ARAC [A0A087U4J8] SubName: Full=Uncharacterized protein  
{ECO:0000313|EMBL:KFM72287.1}; Flags: Fragment;27..41

MNSPPVVPKISESVSDTESDPKPMVPLRQRRLPASFWQEP  
LHPWTMNTTNAVFTFMSQRLSVPNALVLAQNTSPFWLRSPPSCCGCATCLNYSYAI PRIPDVYGNLRYRQPVNI  
PCCPSLNSVDQCKLCCTSDSWHPERLRQLRLRSARYNALID PLRQRRLPASFWQEP

tr:A0A087UE32\_9ARAC [A0A087UE32] SubName: Full=Yorkie-like protein  
{ECO:0000313|EMBL:KFM75621.1}; Flags: Fragment;48..62

MSQQQDVIEQKGNQVHVIRSDSETKLDLFLNAVIHPKDYQVPLTVPMRLRNLPSPFFQQPEKGSKSA  
SHSRESSADGSSYPGGSDTPSQPQTQQQLPSGLQINHPRAHSSPASLQOQAYNKSISSSHHQHPRQRSYGDLLD  
DDDNTPLPLGWEKAKTSAGQTYFL PMRLRNLPSPFFQQP

tr:A0A1I8IM79\_9PLAT [A0A1I8IM79] SubName: Full=Uncharacterized protein  
{ECO:0000313|WBParaSite:maker-uti\_cns\_0014022-snap-gene-0.2-mRNA-1};  
99..113

CTVKGIPGIELEASATTNQRVLVWDWAGLHGLAFNRGFGKPTPWNFSGSRTDTSRSFFRLNWHCGSAA  
TPSTSSSSGGIQRRRQLRVRVRPLYPITVPLRDRRLPASFWTHPNRRPQTEAASLPAPQYSVASSQSHLTALTAS  
WAAAAAAAAA PLRDRRLPASFWTHP

tr:A0A1I8GK67\_9PLAT [A0A1I8GK67] SubName: Full=Uncharacterized protein  
{ECO:0000313|WBParaSite:maker-uti\_cns\_0002291-snap-gene-0.2-mRNA-1};  
52..66  
CTVKGIPGIELEASATTNQRLLATPSTSSSSGGIQRRRQLRVRVRPLYPITVPLRDRRLPASFWTHPNRR  
PQTEAASLPAPQYSVASSQSHLTALTASWAAAAAAAAA PLRDRRLPASFWTHP

tr:A0A195F1G8\_9HYME [A0A195F1G8] SubName: Full=Yorkie like protein  
{ECO:0000313|EMBL:KYN34313.1}; 46..60  
MALNQDVDQLSKSNPVVRVDQNSESDLQALFDTVLPKPSKRPLQVPLRLRNLPSFFNPPSTGSKSPSI  
SHSRENSADSAHPRAHSSPASLQQTYASAAQAPQHAPQPHARHHHHQKQRSYDVISTVDDLGPLPHGWEQARTPE  
GQIYFLNHLTRTTTTWEDPRKTAASVAAVAAVAVESSKSNALGPLPDGWEQARTAEGEIYFINHQTRTTTSWFDPR  
IPSHLQRTPASGAMLPQNWQLQQPAGIQSNQNLQACQKQKIRLQSLQLERERLQQRQQEIMRQQQEMMLRQSTTD  
AVMDPFLSGINEQHARQESADSGGLGSAISLQASDDFLNIDENMDSTSDGGTPEPDLSTLSDNIDSTDDLLP  
SLQLNEEFSTDILDDVQSLINPNTTKPENVTWL PLRLRNLPSFFNPP

tr:A0A1B6G6L8\_9HEMI [A0A1B6G6L8] SubName: Full=Uncharacterized protein  
{ECO:0000313|EMBL:JAS58077.1}; 45..59  
MALNPDVEQLKGNLVVRIDQDSSELQALFDSVLKPDSSRRPLQVPPFRMRKLPNSFFNPPSTGSKSPSVS  
SISHSRENSADSAFGNNTTTTTTTGLQVNHPRHSSPASLQQTYASAHQQQQQHIKQRSCDMTALQDLGPLPAG  
WEQARTLEGQVYFLNHITTTTTWEDPRKTIAAQVANQQQSAELLNTPHPATSPQPQKGSPPATSPAPLGLPPE  
GWEQAATPEGEIYFINHQTRTTTSWFDPRIPHTLQRPPTSGALLPAALSSWLPQVQSSASQQKLRQLQSLQLERERL  
KLRQQEIMRQQELMMRQSTTDSGMDPFLSGLTDHARQESADSGLGMSNNYSLPHTPEDFLSTMDNMDGISEGGT  
PGPADIALDSHEMTSLTDNIDSTDDLVPQLAADDPIFFANIFGGSIL PFRMRKLPNSFFNPP

tr:A0A1B6G5W6\_9HEMI [A0A1B6G5W6] SubName: Full=Uncharacterized protein  
{ECO:0000313|EMBL:JAS57830.1}; 45..59  
MALNPDVEQLKGNLVVRIDQDSSELQALFDSVLKPDSSRRPLQVPPFRMRKLPNSFFNPPSTGSKSPSVS  
SISHSRENSADSAFGNNTTTTTTTGLQVNHPRHSSPASLQQTYASAHQQQQQHIKQRSCDMTALQDLGPLPAG  
WEQARTLEGQVYFLNHITTTTTWEDPRKTIAAQVANQQQSAELLNTPHPATSPQPQKGSPPATSPAPLGLPPE  
GWEQAATPEGEIYFINHQTRTTTSWFDPRIPHTLQRPPTSGALLPAALSSWLPQVQSSASQQKLRQLQSLQLERERL  
KLRQQEIMRQQELMMRQSTTDSGMDPFLSGLTDHARQESADSGLGMSNNYSLPHTPEDFLSTMDNMDGISEGGT  
PGPADIALDSHEMTSLTDNIDSTDDLVPQLGEEFSSDILDEVQALINPKVDNGLTWL  
PFRMRKLPNSFFNPP

tr:A0A1I8IES8\_9PLAT [A0A1I8IES8] SubName: Full=Uncharacterized protein  
{ECO:0000313|WBParaSite:maker-uti\_cns\_0011849-snap-gene-0.3-mRNA-1};  
101..115  
SKCTVKGIPGIELEASATTNQRLLVWDWAGLHGLAFNRGFGKPTPWNFGSRTDTSRSFFRLNWHCGS  
AATPSTSSSSGGIQRRRQLRVRVRPLYPITVPLRDRRLPASFWTHPNRRPQTEAASLPAPQYSVASSQSHLTALT  
ASWAAAAAAAAA PLRDRRLPASFWTHP

tr:A0A182KD48\_9DIPT [A0A182KD48] SubName: Full=Uncharacterized protein  
{ECO:0000313|VectorBase:ACHR008685-PA}; 65..79  
MAFNNGGAAGSGSSAAAAAVATDENEPTGANKKKNLIILVDKDSNDKLNELFDKTLNKLPLQIPYRMR  
KLPEFFMPPSSGSKSPSVSHSRENSADSAFGSGTTILGGVTGVATGPNGLPIHHSRAHSSPASLGKIPVGLGGL  
GGGVVAAAAAAAAAAAAAAAAAGGNGAGGGGGGGGGGGGTGAGNTAAGAGGSKSAAAQAAAAAAAAQNDASSLGA  
LQQAALSKAAIQHLHSRGRSYDVSNLHANFGEPLPPGWEQAKTQDGRYYIK PYRMRKLPEFFMPP

tr:A0A2M4CYC1\_ANODA [A0A2M4CYC1] SubName: Full=Putative transcriptional  
coactivator yorkie {ECO:0000313|EMBL:MBW70332.1}; 82..96  
MAFNGSTPGVSGNGNAAAAAAAAAVAAVAVGASAAAGASEENDPTASATKKNLIILVDKDSNDKLNELF  
DKTLNKLPLQIPYRMRNLPEFFLPPSSGSKSPSVSHSRENSADSAFGSGTTILGGVVTVVTTGPNGLPIHHS  
RAHSSPASLGKIPAGLVGLGGGAVAAAAAAAAAAAAAAAAAGGAGAGAGGGASVGGGGGGGAAAGTGTGAAGVKQQQSA  
AQQQQQNAAAAAAAAAAASDASSLGAAVLQQAALSKAAIQHLHSRGRSYDVSNLHVTFGELPPGWEQAKTQDGR  
IYYINHNTRTTTTWEDPRITAMQESLFQQQSSVETLFNTGSQTLLSPTISSPTPTPNVVFPAIQTNEIVPPSN  
AAPPAAMLTGSNADLGLPEGWEEGITEKGERYYINHATRSTTWRDPRLSNQDWAQEQTVRLYNLQLERERLRK  
RQQEIKSHMGDDPFLSGIADHTRQESGDSGLSESSMTQSMPTPDFLSSIDDSMDGLSMTDNTMDTIAFGDNLET  
PDEFMLDDPLLEKIDAVTNLNLIDPTSSKENTLYDII PYRMRNLPEFFLPP

tr:A0A2M4CYV0\_ANODA [A0A2M4CYV0] SubName: Full=Putative transcriptional coactivator yorkie {ECO:0000313|EMBL:MBW70477.1}; 82..96

MAFNGSTPGVSGNGNAAAAAAAAAVAAVAVGASAAGASEENDPTASATKKKNLIILVDKDSNDKLNELF  
DKTLSNKLPLQIPYRMRNLPESFFLPPSSGSKSPSVSHSRENSADSAFGSGTTILGGVVTVVTTGPNGLPIHHS  
RAHSSPASLGKIPAGLVGLGGGAVAAAAAAAAAAAAAAAAAGGAGAGAGGGASVGGGGGGGAAGTGTGAAGVKQQQSA  
AQQQQQQNAAAAAAAAAAAAAAAAASDASSLGAAVLQQAALSKAAIQHLHSRGRSYDVSNLHVTFGELPPGWEQAKTQDG  
RIYYINHNTRTTTTWEDPRITAMQESLQQQSSVETLFNTGSQTLLSPTISSPTPTPNNVVFPDAIQMTNEIVPPS  
NAAPPAAMLTGSNADLGPLPEGWEEGITEKGERYYINHATRSTTWRDPRLSNQDWAVQEQTVRLYNLQLERERLR  
KRQQEIKSHMGDDPFLSGIADHTRQESGDSGLSESSMTQSMPTPDLSSIDDSMDGLSMTDNTMDTIAFGDNLE  
TPDEFMLDDPLLLEKIDAVTNLNLIDPTSSKPENTLYDII PYRMRNLPESFFLPP

tr:A0A2M4CYR8\_ANODA [A0A2M4CYR8] SubName: Full=Putative transcriptional coactivator yorkie {ECO:0000313|EMBL:MBW70476.1}; 82..96

MAFNGSTPGVSGNGNAAAAAAAAAVAAVAVGASAAGASEENDPTASATKKKNLIILVDKDSNDKLNELF  
DKTLSNKLPLQIPYRMRNLPESFFLPPSSGSKSPSVSHSRENSADSAFGSGTTILGGVVTVVTTGPNGLPIHHS  
RAHSSPASLGKIPAGLVGLGGGAVAAAAAAAAAAAAAAAAAGGAGAGAGGGASVGGGGGGGAAGTGTGAAGVKQQQSA  
AQQQQQQNAAAAAAAAAAAAAAAAASDASSLGAAVLQQAALSKAAIQHLHSRGRSYDVSNLHVTFGELPPGWEQAKTQDG  
RIYYINHNTRTTTTWEDPRITAMQESLQQQSSVETLFNTGSQTLLSPTISSPTPTPNNVVFPDAIQMTNEIVPPS  
NAAPPAAMLTGSNADLGPLPEGWEEGITEKGERYYINHATRSTTWRDPRLSNQDWAVQEQTVRLYNLQLERERLR  
KRQQEIKSHMGDDPFLSGIADHTRQESGDSGLSESSMTQSMPTPDLSSIDDSMDGLSMTDNTMDTIAFGDNLE  
TPDEFMLDDPLLLEKIDAVTNLNLIDPTSSKPENTLYDII PYRMRNLPESFFLPP

tr:A0A194PPP3\_PAPXU [A0A194PPP3] SubName: Full=Protein yorkie {ECO:0000313|EMBL:KPI94943.1}; 44..58

MALNTDSEQKSNLVLVVDQSDSVLQSLFDTVLKPKDSKRPLQVPLRMRQLPKSFFNPPSTGSKSPSVSH  
SRENSADSAFGSSSATGAAPVSHSRAHSSPASLQQTAAAGQQTQQAPLHHQHSKQRSYDVGTHMQDDLGPLPSGW  
EQARTPEGQIYYLQKQAGDMRLRCLAGRAPPVRRARRSLQPCERDGP SRARLRPQQIDSYHFLIASWVDVL  
PLRMRQLPKSFFNPP

tr:A0A2S2NBW4\_SCHGA [A0A2S2NBW4] SubName: Full=Yorkie {ECO:0000313|EMBL:MBY14704.1}; 66..80

MSGLQQQQQEQQHQQVSIKMEPTGPSSPTPAVNSNLVVRVDQNSSETDLQALFDTVLKPDGKKPLQLPLRM  
RQLPKSFFNPPSTGSKSPSISHSRENSGDSAFGTTAAGQCTGGPVMHSRAHSSPASLQQTAAAGQQTQQAPLHHQHSKQRSYDVGTHMQDDLGPLPSGW  
EQARTPEGQIYYLQKQAGDMRLRCLAGRAPPVRRARRSLQPCERDGP SRARLRPQQIDSYHFLIASWVDVL  
PLRMRQLPKSFFNPP

tr:A0A1B6LNH3\_9HEMI [A0A1B6LNH3] SubName: Full=Uncharacterized protein {ECO:0000313|EMBL:JAT25208.1}; 45..59

MALNPDVEQLKGNLVVRIDQSDSELQALFDSVLKPDSSRRPLQVPPFRMRKLPNSFFNPPSTGSKSPSVS  
SISHSRENSADSAFGTNTTTTTTATGLQVNHPRAHSSPASLQQTAAAGQQTQQAPLHHQHSKQRSYDVGTHMQDDLGPLPSGW  
EQARTPEGQIYYLQKQAGDMRLRCLAGRAPPVRRARRSLQPCERDGP SRARLRPQQIDSYHFLIASWVDVL  
PLRMRQLPKSFFNPP

tr:A0A1B6L2C5\_9HEMI [A0A1B6L2C5] SubName: Full=Uncharacterized protein {ECO:0000313|EMBL:JAT17848.1}; 45..59

MALNPDVEQLKGNLVVRIDQSDSELQALFDSVLKPDSSRRPLQVPPFRMRKLPNSFFNPPSTGSKSPSVS  
SISHSRENSADSAFGTNTTTTTTATGLQVNHPRAHSSPASLQQTAAAGQQTQQAPLHHQHSKQRSYDVGTHMQDDLGPLPSGW  
EQARTPEGQIYYLQKQAGDMRLRCLAGRAPPVRRARRSLQPCERDGP SRARLRPQQIDSYHFLIASWVDVL  
PLRMRQLPKSFFNPP

tr:A0A1B6MVB7\_9HEMI [A0A1B6MVB7] SubName: Full=Uncharacterized protein  
{ECO:0000313|EMBL:JAT39875.1}; 45..59

MALNPDVEQLKGNLVVRIDQDSSELQALFDSVLKPDSSRRPLQVPPFRMRKLPNSFFNPPSTGSKSPSVS  
SISHSRENSADSAFGTNTTTTTTATGLQVNHPRAHSSPASLQOQTYASAHQQQQQHIKQORSCDMSVLEQDLGLPLPA  
GWEQARTLEGQVYFLNHITRTTTTWEDPRKTIAAQVANQQQORSAELLNTPHPATSPQPQATHLQRPPTSGALLPAA  
LSSWLPQVQSSASQQKRLRLQSLQLERERLKLRRQOEIMRQELMMRQSTTDSGMDPFLSGLTDHARQESADSGLGMS  
NNYSLPHTPEDFLSTMDNMDGVSEGGTPGPADITLDSHEMTSLTDNIDSTDDLVPSSLQLGEEFSSDILDDVQAL  
INPKVDNGLTWL PFRMRKLPNSFFNPP

tr:T2MG76\_HYDVU [T2MG76] SubName: Full=Yorkie homolog  
{ECO:0000313|EMBL:CDG70925.1}; 43..57

MDMNSTQRQGNFVLHVRQDSDTDLQFLKNSVSTNKDIPRSKPFDRKLPASFFRPPPSLETDTQAPIH  
TRARSLPSNIGQIAQDQVILQQQQQLQQQHPQNNFLLLTPSHQRTQSYGTLESNYLPSGCEMRTTASGQKYYINHQN  
QSTSWQDPRKAQSMTVLPANPQNLLMDDLPEGWERAVTAEGEVYFINHQTKTTSWFDPRLNRPNNNLLGGTNIQ  
YYQQEKRRHQQQIQNQLLREFLIHQRMNGQHTDSVLNNSLNNLVREKYTAHMNSSVLGRGSSVDSGLDGMES  
YLTSTSTDGLNDMDTADVDRNNQFDKNTSMEQGCIFNNRLEPFFDLSQASNVLDLILEDGSELSSDLEAINTEAL  
NDVDMILSPNNKPNAYMTWL PFRDRKLPASFFRPP

tr:A0A1B0D0M3\_PHLPP [A0A1B0D0M3] SubName: Full=Uncharacterized protein  
{ECO:0000313|VectorBase:PPAI000895-PA}; 65..79

MALNNSNSSSGSNLNSNNNNNNNESDNTKQGNLVVRMDEDSATKLQALFDTVLKQSEQRPLQIPLMR  
KLPNSFFNPPSTGSKSPSVSHSRENSIDSAFGSGTTIVYAPGGGSGSGTGTASSVLTQRLSISHSRAHSSPATLE  
QTHAAGLKSVTGATGSGNSTSQTQAQTPLKAVHASQRSYDVISAIQLQDELGLDLPPEGWEQARTAEQQIYYLKLVL  
SPCRQFIIPMVCFKNSFSTLHKSQLLADKSALIY PLRMRKLPNSFFNPP

tr:F6WJM1\_CIOIN [F6WJM1] SubName: Full=Uncharacterized protein  
{ECO:0000313|Ensembl:ENSCINP00000022513}; 50..64

MDMEENNEPTTQTTTFTHHNQIIHVRQDSASELEALFNTVMNPNFKSKSLPMKARNLPKSFFFTQDPKPRQ  
QAAYHHGHSQSVGGLVAPNSVSHSRKSSPASLQLMDIGLSVKASDIPDMPLPHGWSAAKTADGQQYYMNHND  
RSTTWEDPRIGILKQQRQONQVVMQONQSIATNIHQQQIPLPSGWEQAATPQGEIYFINHQTKSTSWVDRPFQKKY  
WLKERNVTENRVSFPEPESNFTPEINLCGKSGNQQLCLGRLSPEKHRLKLRRTHSNSRRDYQEIILRLGITPTNN  
NPPNNSQLQQQLMKQLSNPGMENFMGGGNPSFHQRDASLDSGVGMGSNYSLPRTPDGFLNNVEEMETAQPATQQ  
HTHTNNQRFPPDFLDTLPASSVDFTSSPVPTSGGQRVCTTSASLDGSELVPSLQDSLQDFDVEFMLNHVKTENMD  
NGMIWL PMKARNLPKSFFFTQP

tr:A0A067QNF7\_ZOONE [A0A067QNF7] SubName: Full=65 kDa Yes-associated  
protein {ECO:0000313|EMBL:KDR09902.1}; 45..59

MALNPDSEQHKGKGNLVVTIDEDSDSDLQALFDSVLKPDSSRPLQVPLRMRKLPNSFFNPPSTGSKSPSVS  
SISHSRENSADSAFGTASVAGPGGTTTTSAAGANGLQVNHPRAHSSPASLQOQTYASAQQQQHGLKQRSYDIT  
VDELGLPLPPGWEQARTREGQVYYLNHITRTTTTWEDPRKTLAAQVAQSQQQTSADLISNVAGSPHSSSSPQPQVDG  
SSLGPLPEGWEQATTQEGEVYFINHQTRTTSWFDPRIPMHLQKSPAGTILPQHSASWIQPLSTQSQCQQKIRLQ  
SLQMERERLKLRRQOEIMRQOGIMLRQASTTDLPPGANSAGMDPFLSGLTDHSRQESADSGLGMCNSYSLPHTPED  
FLANMDDNMDGVSEGGNPADMATLDGPDISLSDNIDSTDDLVPSSLQLSEEFSSDILDDVQSLINPNSRPDNLV  
WL PLRMRKLPNSFFNPP

tr:A0A1D2NI00\_ORCCI [A0A1D2NI00] SubName: Full=Transcriptional  
coactivator YAP1 {ECO:0000313|EMBL:ODN04606.1}; 54..68

MAASGNNGPGSGALPSHKSQQIIHMRGDSSELQALFDSVLQPGIAGRRPNGVPLRLRKLKLPDSFFKPPS  
TGSKSPSVSVSHSRENSVDSTLNPMMRSPMTSNGAMGAGGHHRAHSSPATLEQTYSVAQSHVSQASPSLQSGSSG  
NLSEDPLPPGWEQACTAEGQVYFINHITRSTTWEDPRKAHQQILAAVGGEPNTGNSPNSLMSAMGIAQGMANGPL  
PEGWEQAITPEGEVYFINHQARTTSWFDPRLPAHLQRPVVLQQQLNAAALAAQAAANAAALGNGATAQLLQMPKQQ  
ELRLQQLQLERERLKLRRQOEIMRQMEQEQARLARQQPARAPPTQMDGLELDPFLSGSTMGNPSTPSSDFHSRQE  
SADSGLGMCNSYSLPNTPEDFLSTMDNMDTISENGLGGASLDTGDIPILGSDPVDSTDDLVPSSLPDELSSSELL  
DEMOSIINSKSDNGMTWL PLRLRKLKLPDSFFKPP

tr:A0A0M9A5Y1\_9HYME [A0A0M9A5Y1] SubName: Full=Yorkie like protein  
{ECO:0000313|EMBL:KOX77897.1}; 46..60

MALNQDQVQLSKSNLVVRIDQNSSEDLQALFDSVLKPDSSRPLQVPLRMRNLPDSFFNPPSTGSKSPSI  
SHSRENSADSAFAVASLTVAHPRAHSSPASLQOQTYASAHQQAPQHAPQHARHHHHQKQRSYDVISVDDDLGLPLH

GWEQARTPEGQIYFLNHLTRTTTWEDPRKTA AAAANVAAAAAVDNGKSTTGATNSLGLPLPDGWEQARTPEGEIYF  
INHQTRTTSWFDPRIPTHLRPPTSGAMLPQSWLQOPTGGGIQSNQTLQACQQKLRQLQSLQMERERLKRQQEII  
RQQELMLRQSTTDAAMPFLSGINEQHARQESADSLGLGSAYS LPHTPEDFLANIDDNMDGTS DGGAPMETPDL  
STLSDNIDSTDDLVP SLQLSEDFSSDILDDVQSLINPNTTKPENVLTWL PLRMRNLPDSFFNPP

tr:A0A1J1ITS4\_9DIPT [A0A1J1ITS4] SubName: Full=CLUMA\_CG015352, isoform  
A {ECO:0000313|EMBL:CRL02510.1}; 65..79

MAFNSSQTRQSTQLSATNEDETNLQQQQQKKNLIILVEKDSNDKLDLDFDKTLSNKLPLQVPYHMR  
NLPASFFKPPSSGSKSPSVSHSRENSADSAFGSGTTIGAGVQSTATPVVAPSAIPSGLTIHHSRAHSSPASLGKL  
PLNINLNLSALNLG SVTPTNSSPSPNHSSSNISSISSNNSKQQQSGISVNIASNSTNSTNNTNLLNNGTGS  
NQSTNNNLPHNILDKTLQHIHSRGRSYDIPSLQHQIHFGELPTGWEQAKTHEGKIYYINHNRTRTTQWEDPRIQAA  
TTALSNGNLFSSSEHSSVETLFSPTHLSSLGSTQNVTDTQSQTQTAAITAPSVPLGNNTNLGPLEWPWEEGVT  
ENGERYYINHITRTRTTWRDPRLSNQDWADQEQSVRIFNHLHERERLKRQQEIAKLNIGEDPFLSGMTDHARQES  
SDSGLSVLSHTPDFLSTIDDSMDGLSSTVNDSDMTITFNEAMETPDEFMLNDPLLLDKIDELI  
PYHMRNLPASFFKPP

tr:A0A182YR17\_ANOST [A0A182YR17] SubName: Full=Uncharacterized protein  
{ECO:0000313|VectorBase:ASTEI10903-PA}; 72..86

MAFNNGGAAGGNGSAAAAVAAGAANNATDENEPTGANKKKNLIILVDKDSNDKLNELDFDKTLSNKLPL  
QIPYMRKLPESFFMPSSGSKSPSVSHSRENSADSAFGSGTTILGGVTVGATGPNGLPIHHSRAHSSPASLGKI  
PVGLGGLGGGVVAAAAAAAAAAAAASNGAGGGGGGGGGGGGGTGGAGAGSAGGAGGSKSAAAAQAAAAVAAAQ  
NDASSLGA AVLQQAALSKAAIQHLHSRGRSYDVSNLHANFGE LPPGWEQAKTQDGR IYYIK  
PYMRKLPESFFMP

tr:T1HC02\_RHOPR [T1HC02] SubName: Full=Uncharacterized protein  
{ECO:0000313|EnsemblMetazoa:RPRC001564-PA}; 44..58

MAGNPDVEFKSSLVVRIDQSDSELQALFDSVLKPGSKRPLQVPLRMRKLPDSFFNPPSTGSKSPSVSS  
ISHSRENSADSAFGNATTTVTGLQVNHPRAHSSPASLQQT YASAQQTQPQHLKQRSYDITALDELGPLPPGWEQA  
RTSEGQVYFLKVVSVFVGDGNCNQGEHNL IAGASSFGGCDIVVFGE GPAA PLRMRKLPDSFFNPP

tr:J3RGB6\_9EUKA [J3RGB6] SubName: Full=Yorkie-like protein  
{ECO:0000313|EMBL:AER13454.1};>gp:JN202490\_1 [JN202490] Yorkie-like protein  
[Capsaspora owczarzaki] 113..127

MQQQQQQQSQQS QLQHPHSHNSLYSLSQSSHSQPHSRHSSMHVRKSSMDSVSSASQHGSGKYLAMDTT  
GRGSTVDPLYAPVLP HNRSQSESNQYHISQPSLDSLHSTLSMPPLRDRNLPASFFRSPSSAAADRIDSSAMSEAG  
ASHSRDSSLDG ISFVPHQPQLIMNGSTFPPVAFHSRQSSAGSSEPTSQSHNLQQQLLLLQQQQQQQLLYQQ  
QQQLSLPQQSGQMPGQSPGLLVPMYNQLQHSYQTSQSSFPFPATPSSAHSSTFFSREPSISSFLEMSLHFEQQQ  
QQPQQHSRPLSHNSGNVLSAQANNPGLPASGNSSNSLQRLSASSLDESPLPPGWEKGIKDG LPPFFIDHNNKTTT  
WVDPRTDRATPGTQGLSERKRPDVLSDPLL NPTLNPLPAGWEMAMHSDGIPYFINHRKRTTTWIDPRTDVDMQE  
YFRNQTYSAATS VRRRDSGRSAHALSFGNGASPPAPGLENGPPSELRVHASTMTRISPRNTPFSSFDALPDG  
YDQMTGNSSPLASFNLTSPPPPVSPGITGMDSQSLAGLSQRELQARRMMLQKEQIRLQMQQLLQEELEIQRAQRN  
LAVLETTTRGGS AKLPPPQLTVSECLTTTTATATADVTSRRSVSDTSMPEPVVATKANRSSSTAGSTLYSPMQQ  
LVLRLGHSQPQQQFGFSPASTRRSTCNTSRC PLRDRNLPASFFRSP

tr:A0A2J7PQI8\_9NEOP [A0A2J7PQI8] SubName: Full=Uncharacterized protein  
{ECO:0000313|EMBL:PNF18603.1}; 45..59

MALNPDSEQHKG NLVVRIDEDSDSDLQALFDSVLKPD SKRPLQVPLRMRKLPNSFFNPPSPASLQQT YA  
SAQQQQHGLKQRSYDITPVDELGPLPPGWAQARTPEGQVYYLK PLRMRKLPNSFFNPP

tr:W4YAW0\_STRPU [W4YAW0] SubName: Full=Uncharacterized protein  
{ECO:0000313|EnsemblMetazoa:SPU\_012881-tr}; 45..59

MEPAGGRKQNAVHVVRGDSGAELDDLFRNVLNTPEAADKVPSQVPWRKRNPASFFQEPRISHSRESSA  
DSTNYSGNMNASHEIASRSLGPQGMTIAHSRAHSSPASLQEMRNINPQDVIRNQHLRQQSYDISD TDNPNLPSG  
WEMAVTPTGQKYFLDFDDKRHDVKTVCVSFITVRG PWRKRNPASFFQEP

tr:A0A0J7KY09\_LASNI [A0A0J7KY09] SubName: Full=Yorkie-like protein  
{ECO:0000313|EMBL:KMQ95206.1}; 46..60

MALNQDVDQLSKSNLVVRVDQNS ESDLQALFDTVLKPD SKRPLQVPLRMRNLPNSFFNPPSTGGSKSPS  
ISHSRENSADSAFGTAVAATPSGGGGGGGGAPNVSANGNGSGGGTTTGAGGGGGGAGGGGGAGGGGGANSTAGA



VAAAAVAAAAAAGLTVAHPRAHSSPASLQQTYASAQQAPQHAPQPHARHHHQQKORSYDVISTVDDLGLPLPHG  
WEQARTSEGQIYFLNQVAISTAEIDKMSVSDIALNIVKPINNRQDILEIQGNLGDNGLITL  
PLMRNLNSFFNPP

tr:W4Y1C6\_STRPU [W4Y1C6] SubName: Full=Uncharacterized protein  
{ECO:0000313|EnsemblMetazoa:SPU\_009506-tr}; 139..153  
MDKLVKPSASTSPPTANNGKRGPTCSLSGSSSSEGEESDHEEIPSPCSSTSSGPTYVRPPGFKHHGQE  
IKVQEQRPKVNTSVRIKRKIKRQSMKDVLPVLSHVTSHPVTKVTMEEKTTGVQVLPSPGMKTKVRKEPIPMRLRA  
LPQSFQQPNTVNSASPGSMYSVLPPLCKMEQNSDLGKVP PMRLRALPQSFQQP

tr:A0A2A3EAS4\_APICC [A0A2A3EAS4] SubName: Full=WW domain-containing  
transcription regulator protein {ECO:0000313|EMBL:PBC28574.1}; 46..60  
MALNQDQDQSLKSNLVVRIDQNSESDLQALFDSVLKPGSKRPLQVPLMRNLPSFFNPPSTVGGGGPT  
PGGNATGTPATGAAGAATGGSGNSAGSGSNAAGAAAAGLTVAHPRAHSSPASLQQTYASAQQAPQHAPQPHARHH  
HHQKORSYDVISTVDDLGLPLPHGWEQARTPEGQIYFLKHAPLRGSIQESVSFLLIDIAVATHLQRAPTSGLMLPQ  
NWLQQQQPTGGGIQNNQTLQACQQKLRQLQSLQMERERLKRQEQEIIIRQQELMLRQSTTDAAMDFFLSGINEQHAR  
QESADSGGLGSAISLPHPTPEDFLANIDNMDGTSDDGAPMETPDLSTLSDNIDSTDDLVPVSLQLSEDFSSDILD  
DVQSLINPNTTKPENVTWL PLMRNLPSFFNPP

tr:A0A023F3K9\_TRIIF [A0A023F3K9] SubName: Full=Putative ww domain-  
containing transcription regulator protein 1 {ECO:0000313|EMBL:JAC15946.1};  
44..58  
MAGNPDVEFKSSLVVRIDQSDSELQALFDSVLKPGSKRPLQVPLMRKLPDSFFNPPSTGSKSPSVSS  
ISHSRENSADSAFGNATTTVSGLQVNHPRAHSSPASLQQTYASAQQTQPQHLKORSYDITALDELGLPLPPGWEQA  
RTSEGQVYFLNHITQTTTWEDEPRKANAVAQQRASDLLNAAASSPGHSTSPQPHQKNGSGGSGSGNSGSSNGGA  
APTGLGPLPDGWEQAATAEAGEIYFINHQTKTTSWFDPRIPVHLQRAPSTTGALPSWLQPVVTSQTLQATQQKLR  
LQSLQMERERLKRQEQEIMRQELMLRDAPATTGLDPFLPGVTDHSRQESADSGGLGNSYSLPQTPDDFLTSM  
MDASVSDGGTASEMAGLDSHEITSLSDNIDSTDDLVPVSLQLGEEFTSDILDVQALINPTSKGNSLTWL  
PLMRKLPDSFFNPP

tr:A0A1E1WGE3\_PECGO [A0A1E1WGE3] SubName: Full=Uncharacterized protein  
{ECO:0000313|EMBL:JAT86052.1}; 44..58  
MALNSDGEQKSNLVLRVDQSDSVLQSLFDTVLKPGSKRPLQVPLMRQLPKSFFNPPSTGSKSPSVSH  
SRENSADSAFGSSSATGAAPVSHSRAHSSPASLQQTYAAGQONQOPPLHHQHSKORSYDVGTHIPDDLGLPLPAGW  
EQARTPEGQIYYLNHITKTTTWEDEPRKSLAAQAVAAQHQSAETLLSQTTPAQTIPTSPSTPAKSTSSSTPSDPLGP  
LPEGWEQAATPEGEIYFINHAARTTSWFDPRIPQHLQRTPAANAGAAGGGWANASIQACQQKLRQLQSLQLERERL  
KQRQEQEIRLQELMARQASSIVSSLASSTGAVASTELPLDPFLSGLTDHQEQESADSGLGMVAVSQQSYMPHTPED  
FLAGMDDRMDCSTSEAGANIDSTDIALGDNIDSTDDLVPVSLQVTVAY PLMRQLPKSFFNPP

tr:A0A0K8T4K1\_LYGHE [A0A0K8T4K1] SubName: Full=Uncharacterized protein  
{ECO:0000313|EMBL:JAG60336.1}; 48..62  
MSGNPDGRGVQQGSNLVVRIDHDSETELQALFDSVLKPEAKQRPQSKPFRMRNLNSFFNPPSTGSKSP  
SVSSISHSRENSADSAFGTTTTTMMGLTVNHPRAHSSPASLQQTYASASVAVASSPQHLKORSYDISSLDLGLPL  
LGWEQARTSEGQIYFLNHMTQTTTWEDEPRKTAQAQQQAQQRSQELLNTVATSPHPSTSPQPHQKNGGVS  
AGLGLPLPDGWEQAQTLQEVYFINHRTKTTTSWFDPRIPVHLQRAPAAGNVLPVSWLQQLSPLSANIAASQQKLR  
LQSLQERERLKVRAEIMRQELMLRDAPATTGLDPFLSGLADHSRQESADSGLGLGNNYSLPHTPDDFLSTMDN  
MDGVSEAGAEMGSLDSHELTISDNIDSTDDLVPVSLQLGEEFTSDILDVQALINPNSKPGNSLTWL  
PFRMRNLNSFFNPP

tr:A0A146KK45\_LYGHE [A0A146KK45] SubName: Full=Yorkie  
{ECO:0000313|EMBL:JAP96953.1}; Flags: Fragment; 13..27  
VLKPDSCRPLQVPWMSMRKLPDSFFNPPPTGSKSINHSRENSVDSAFGSSSGGGSGTGATAVSTAALQN  
QHHRHSSPASLQQTYAVGQQTAPTHHHIKORSYDVASKSSEDSTPLPPGWEQARTPEGQVYYLNHLTRTTTWE  
PRKSLVSQGAQQHQAELTSHQVSTQTPSQSPACTAKANTDIDLGLPLPEGWEQAQTPEGG  
PWSMRKLPDSFFNPP

tr:A0A182IXU2\_9DIPT [A0A182IXU2] SubName: Full=Uncharacterized protein  
{ECO:0000313|VectorBase:AATE007567-PA}; 65..79  
MAFNSTGAGGSAAAAAAVASEENEPTGASKKNLIILVDKDSNDKLNELFDKTLNKLPLQIPYRMR

KLPESFFMPPSSGSKSPSVSHSRENSADSAFGSGTTILGGVTVGTTGPNGLPIHHSRAHSSPASLGKIPVGMGGL  
GGGVVAAAIAAAAAAAAAANGSGGGGGGGGGGAGGSGAVNGSKANAAAIAAQAQNAAGNDASSLGAAVLQQAAL  
SKAAIQHLHSRGRSYDVSNLHANFGELEPPGWEQAKTQDGRYYYYIKPGVMVMVLLRFSAAVESEKHAAWKDTSNKK  
SNKPAPATQNOQK PYRMRKLPESEFFMPP

tr:B4GCJ5\_DROPE [B4GCJ5] SubName: Full=GL10424  
{ECO:0000313|EMBL:EDW32472.1}; 61..75

MSTSNTNNIIIEKEIDDEDMLSPIKSSNNLVVRVNQDTPDDNLQALFDSVLNPGDAKRPLQLPFRMRKLPN  
SFFTPPAPSHSRANSADSTYDAGSQSNINKTAQPVDVQQPAISQIQPSQQSRLAIHHFRARSSPASLQQNYNVRS  
RSDANPGPSGGQPTYPENSAEFPNSAANTIELDGMNTCMGGQDMPMSTQTVHKKQRSYDVVSPIQQLQSGLGALPP  
GWEQAKTNDGQIYYLNHTTKSTQWEDPRIQYRQQQRLMAERIKQSESGLTGLDCPDNLVSSLIQIEDNICTNLFN  
DAQTIVNPPSSHKPDDLEWYKIN PFRMRKLPNSEFFTPP

tr:A0A1Q3FK93\_CULTA [A0A1Q3FK93] SubName: Full=Uncharacterized protein  
{ECO:0000313|EMBL:JAV27997.1}; Flags: Fragment; 66..80

MAFNSSSSASNNNNNTASNTSASEENDGASKKKNLIIILVDKDSNDKLNELFDKTLNKLPLQIPYRM  
RKLPSDFFKPPSSGSKSPSVSHSRENSADSAFGSGTTILGGVNPVTGPNGLPIHHSRAHSSPASLGKIPAGLISS  
LTGGSGSGVAQATGNSKAQQQADSSSLGASSVAQQQQQQQQQAQQGLPKQAIQHL PYRMRKLPSDFFKPP

tr:A0A195B2H4\_9HYME [A0A195B2H4] SubName: Full=Protein yorkie  
{ECO:0000313|EMBL:KYM78480.1}; 46..60

MALNQDQDQLSKSNPVVRVDQNSEDLQALFDTVLKPDSCRPLQVPLRLRNLPSFFNPPSTGSKSPSI  
SHSRENSADSAFGAAVPATPNGGGSGVPNGGTNGSGGGGGGXXXXSPRPASPFLIPAPATAAQPPSSRRTRRH  
SKRRNTRRSRTRVTTIIRSSAATTSSARSTTWARCRTDGSKRAPPRARSTSSRLPQTGKTGKIQGN  
PLRLRNLPSFFNPP

tr:A0A131YDR7\_RHIAP [A0A131YDR7] SubName: Full=Protein yorkie  
{ECO:0000313|EMBL:JAP76600.1}; 59..73

MSSSPSQPNNGAATNTRGEMIEQKGNHIVRIRSDSDINLDDLFKAVMQPSDRVPLSVPMRLRNLPSF  
FQQPDRSKSASHSRESSSDATFSPSEASAAAAAAAAAAAAVAAPPSPVNHPRAHSSPASLQQSYNAPSPQHRLQ  
QSYDLVDDLLPPGWEMAKTSTGQRYFLNHLTQTTTWDPRKKTPTSTKHHATPPPPHTAAPPAGPFKNLGLPLDGW  
EQATTAEGEVYFINHIERTTSWFDPRIPAHQAQKPLLQSHASPLPGHQSSQSGNAVSSSTGPTSPDTMNSISAVVA  
ATSSLTLLQQQRQOKMRLQQLQMERERLKIQQEILRQTAFLGNSARNEMMLRRTLTEEILPSPTSPTASDVAGVG  
PTTDPFLGGDFHSRQESADSGLGLGPNYSLPHTPEDFLSSMDDSIDAGLNDDPNQNSELSLDGLQGTGIDLGTE  
NMDSDDLVPQLSTNFFLGLSPF PMRLRNLPSFFQQP

tr:A0A131YJL0\_RHIAP [A0A131YJL0] SubName: Full=Protein yorkie  
{ECO:0000313|EMBL:JAP79484.1}; 59..73

MSSSPSQPNNGAATNTRGEMIEQKGNHIVRIRSDSDINLDDLFKAVMQPSDRVPLSVPMRLRNLPSF  
FQQPDRSKSASHSRESSSDATFSPSEASAAAAAAAAAAAAVAAPPSPVNHPRAHSSPASLQQSYNAPSPQHRLQ  
QSYDLVDDLLPPGWEMAKTSTGQRYFLNHLTQTTTWDPRKKTPTSTKHHATPPPPHTAAPPAGPFKNLGLPLDGW  
EQATTAEGEVYFINHIERTTSWFDPRIPAHQAQKPLLQSHASPLPGHQSSQSGNAVSSSTGPTSPDTMNSISAVVA  
ATSSLTLLQQQRQOKMRLQQLQMERERLKIQQEILRQTAFLGNSARNEMMLRRTLTEEILPSPTSPTASDVAGVG  
PTTDPFLGGDFHSRQESADSGLGLGPNYSLPHTPEDFLSSMDDSIDAGLNDDPNQNSELSLDGLQGTGIDLGTE  
NMDSDDLVPQLQEEELQGDLLSDMEALLTSSKDSVLTWL PMRLRNLPSFFQQP

tr:A0A182V6X1\_ANOME [A0A182V6X1] SubName: Full=Uncharacterized protein  
{ECO:0000313|VectorBase:AMEM009880-PA}; 24..38

MDSNDKLNELFDKALSINKVPLQIPYRMRKLPESEFFMPPSSGSKSPSVSHSRENSADSAFGSGTTILGGV  
AGVAATGPNGLPIHHSRAHSSPASLGKIPGGMSGLGGGAVAAAAAAAAAAAAAGNGAGGGSGGGGGGGGGTGG  
TGAAGASKSAAAQAAAAVAQNDATSLGAAVLQQAALSKAAIQHLHSRGRSYDVSNLHANFGELEPPGWEQAKTQ  
DGRYYYYIK PYRMRKLPESEFFMPP

tr:A0A0B6YQ79\_9EUPU [A0A0B6YQ79] SubName: Full=Uncharacterized protein  
{ECO:0000313|EMBL:CEK58307.1}; 38..52

MSQDRTPGPIVHVRENSDTELEALFNHAMNPSETNKYVPLRERKLPASFFCPPEPPKPMQQQMGVGDKNP  
TDAPVFHGAVNPNMNIAMHRAHSSPASLQQLSAAPPPTSSSHVRQHSYDALDEQPLPAGWDMAKTPQGQRYLNL  
HVLQITTWNDPRKTHGTGNPATISSNNNNNANTTNLNSLSQTGVSSIPIHSSPGTTPVNVDKVPLPPGWERAYT  
ADLEVYFINHIDRTTSWFHPSLPTHLQRPGMKFQQQLTSGPMSQQDRLKHLKQLQQLQMEQERLKKRQDEIALQE

MALRAQVGETVIGTSGDITAIQSSEITSITDPFFGQGTGSDHHSRQESADSGLGGMGTNYSLPRTPDFLGNMED  
MDTQDGGQKLQGGSDFGSMDMASVNDVVDHLTMDSEDLVPSLQEEINSELLKDVETVLGSKDNPLTWL  
PLRERKLPASFFCPP

tr:A0A0B6YR91\_9EUPU [A0A0B6YR91] SubName: Full=Uncharacterized protein  
{ECO:0000313|EMBL:CEK58306.1}; 38..52

MSQDRTGPIVHVRENSDTELEALFNHAMNPSETNKYVPLRERKLPASFFCPPEPPKPMQQQMGVVKDNP  
TDAPVVFHGAVNPNMNIAMHRAHSSPASLQQSLSAAPPPTSSSHVRQHSYDALDEQPLPAGWDMAKTPQGQRYLLN  
HVLQITTWNDPRKTHGTGNPATISSNNNNNANTTNLNSLSQTGVSSIPIHSSPGTTPVNVDKVPLPPGWERAYT  
ADLEVYFINHIDRTTSWFHPSLPHLQRPGMKFQQQLTSGPMSPOQDRLKHLKQLQQLQMEQERLKKRQDEIALQE  
MALRAQVGETVIGTSGDITAIQSSEITSITDPFFGQGTGSDHHSRQESADSGLGGMGTNYSLPRTPDFLGNMED  
MDTQDGGGNQQ PLRERKLPASFFCPP

tr:T1E377\_9DIPT [T1E377] SubName: Full=Putative yorkie  
{ECO:0000313|EMBL:JAA94768.1}; Flags: Fragment; 62..76

MAFNSSSSNNNSASNTANSSEENDGSSKKKNLIILVDKDSNDKLNELFDKTLNKLPLQIPYRMRKLP  
DSFFKPPSSGSKSPSVSHSRENSADSAFGSGTTILGGVTTGPNGLPIHHSRAHSSPASLGKIPAGLVASLTAANS  
QQQSSNNSSNGNNSKTKQQGGNGEGASAVAVAQQTQQQQQQQQQSLTRQAILHSRGRSYDVSNOHANYGELPPGW  
EQAKTQDGRIYYINHNTRTTTWEDPRITAALQQQESLFOQQSSVETLFTNTGSQTLSSAISSTPN  
PYRMRKLPDSFFKPP

tr:A0A182R0B2\_9DIPT [A0A182R0B2] SubName: Full=Uncharacterized protein  
{ECO:0000313|VectorBase:AFAF020431-PA}; 72..86

MAFNGGNGSSAAAAAAAAAAVAAATNATTDENESTGANKKKNLIILVDKDSNDKLNELFDKTLNKLPL  
QIPYRMRKLPESFFMPSSGSKSPSVSHSRENSADSAFGSGTTILGGVTGVTGPNGLPIHHSRAHSSPASLGK  
IPVGLGGLGGGAVAVAAAAAAAAAAGGGNAAAGGAGGGGGGGGGGGGGGGGAGSGASTSTGGGVKSAAAAQAAA  
QNDASSLGA AVLQQAALSKAAIQHLHSRGRSYDVSNLHANFNGELPPGWEQAKTQDGRIYYIK  
PYRMRKLPESFFMP

tr:A0A0K8W0H5\_BACLA [A0A0K8W0H5] SubName: Full=Protein yorkie  
{ECO:0000313|EMBL:JAI44579.1}; 59..73

MSLSKTVGSLNKGNAKEKSTSKESNNLVVRIDQSDNNLQALFDSVLNPTESKCPQVPPFRMRQLPESF  
FKPPATASRSPVAHSRANSADSAYDTGSQPNVSQGNISTSSVAAPATITQPQVTANRLSISHSRAHSSPASLQ  
QTYNVHIGNVMETSACLQDGIGPVFTTGAVFPFPPSVNAGA AVRMEQGEQVPKDPAPNIQTFHMKQRSYDVVSTIQ  
LQNELGPLPPGWEQAKTNDGQIYYLNHTTKSTQWEDPRIQLKQQIFQDGLSHNVNLKGKESVNLADNLGPLEGW  
EQAYTESGDVYFINHVNRTTSWNDPRIPDFLQKPVKSQKPGPSWLNQIHIEKEQDYFKPSSEQSSLTRQNGSLQM  
DPFLSGDNHARQESSDGLSLSSNTFSTTADLMPNIDDSMDCISGNYSESGSLNALSGIDCPDNLVSSLQVT  
PFRMRQLPESFFKPP

tr:A0A1A9UJ16\_GLOAU [A0A1A9UJ16] SubName: Full=Uncharacterized protein  
{ECO:0000313|VectorBase:GAUT006492-PA}; 63..77

MSLSKSSANDENKCSVKTTDDSSTTAKTSNNLVVRINQSDENLQALFDSVLNPHESKRPLQVPPFRMRKL  
PNSFFNPPAASPKSPTVSHSRANSVDSAYDCGSQPNINQASVATSLSDLQSTTAVVQQPTTTAITQQQPPPPPPPE  
TQRLQICHRAHSSPASLQQSYNLHGNISSDATTSTFIQQQQPQGDGSGTGTVAGTGFTNNMVGFTAAAAAAGLN  
ANSIIGLVNQANAGATSGGGLQTYHMKQRSYDVISPIQLQNELGPLPPGWEQAKTNDGQIYYLNHTTKTTQWED  
PRIQFKQQALNAAANARLNKTTGGNAASLLNGDLGPLEGWEQALTETGDVYFINHIDRTTSWNDPRIPILFQK  
AVKAKNEMSWVNAVEVDKNDIFKQKTIQKPLNKHVSLHMDPFLSGDNHARQESSDGLSLSSNSFAVNTDFIT  
HMDNNMDCISENGSIIIDNLDTTLLQNDNICMLSDVLNPSSTKPDNLEWYKLN PFRMRKLPNSFFNPP

tr:A0A0K8TY67\_BACLA [A0A0K8TY67] SubName: Full=Protein yorkie  
{ECO:0000313|EMBL:JAI19030.1}; 59..73

MSLSKTVGSLNKGNAKEKSTSKESNNLVVRIDQSDNNLQALFDSVLNPTESKCPQVPPFRMRQLPESF  
FKPPATASRSPVAHSRANSADSAYDTGSQPNVSQGNISTSSVAAPATITQPQVTANRLSISHSRAHSSPASLQ  
QTYNVHIGNVMETSACLQDGIGPVFTTGAVFPFPPSVNAGA AVRMEQGEQVPKDPAPNIQTFHMKQRSYDVVSTIQ  
LQNELGPLPPGWEQAKTNDGQIYYLNHTTKSTQWEDPRIQLKQQIFQDGLSHNVNLKGKESVNLADNLGPLEGW  
EQAYTESGDVYFINHVNRTTSWNDPRIPDFLQKPVKSQKPGPSWLNQIHIEKEQDYFKPSSEQSSLTRQNGSLQM  
DPFLSGDNHARQESSDGLSLSSNTFSTTADLMPNIDDSMDCISGNYSGCV PFRMRQLPESFFKPP

tr:A0A0P4VUL1\_9HEMI [A0A0P4VUL1] SubName: Full=Putative ww domain-  
containing transcription regulator protein 1 {ECO:0000313|EMBL:JAI56237.1};  
44..58

MAGNPDVEFKSSLVVRIDQSDSELQALFDSVLKPGSKRPLQVPLMRKLPDSFFNPPSTGSKSPSVSS  
ISHSRENSADSAFGNATTTVTGLQVNHPRAHSSPASLQQTYASAQQQTQPQHLKQRSYDITALDELGPLPPGWEQA  
RTSEGQVYFLNHITQTTTWTEDPRKANAVVQQRASDLLNAAASSPGHSTSPQPHQAVHLQRAPSTTGALPSWLQPV  
VTQSQTLOATQQKLRQLQSLQMERERLKIQQEIMRQQEMLLRDAPATTGLDPFLPGVTDHSRQESADSGLGLGNS  
YSLPQTPDDFLTSMMDASVSDGGTASEMTGLDSHEITSLSDNIDSTDDLVPSSLQLGEEFTSDILDDVQALINPT  
SKGGNSLTWL PLRMRKLPDSFFNPP

tr:V5HBD0\_IXORI [V5HBD0] SubName: Full=Putative yorkie  
{ECO:0000313|EMBL:JAB80740.1}; Flags: Fragment; 39..53

IEQKGNHIVRIRSDSDINLDDLFKAVMQPSNRVPLSVPMLRNLNPASFFQQPERSKSSASHSRESSNDA  
TFSPSSEATAAVVAAAAAVPSLPVNHPRAHSSPASLQQSYNAPSPQHLRQQSYDLADEGSLPPGWEMAKTSTGQR  
YFLNHLTQTTTWTEDPRKKSSGAGPKHHATPPPPHTAAPAALHFKNLGLPLPDGWEQATTGEGEVYFINHIERTTS  
WFDPRIPiHLQKPLLQNGSVPGISGSPNQLPGSGNPAAIGGNSPESMNAISAVVAATSSSLTIQQQRQQLRL  
QQQMERERLKLRRQQEILRQTAFLGNPRNEMLLRRNLTEEILPSPTSPPTSDGGVGPPTDPFLGGDFHSRQESAD  
SGLGLGNYSLPHTPEDFLSSMDDSIDAGLNDDPSHQNSELSLDGLQGTGIDMGTENMDSDDLVPSSLQEELQGD  
LSDMEALLTSSKDSVLTWL PMRLRNLNPASFFQQP

tr:A0A131XWQ1\_IXORI [A0A131XWQ1] SubName: Full=Putative transcriptional  
coactivator {ECO:0000313|EMBL:JAP70722.1}; 63..77

MSSPSQPNIAAAAAAAAAANSRGDLIEQKGNHIVRIRSDSDINLDDLFKAVMQPSNRVPLSVPMLRNL  
PASFFQQPERSKSSASHSRESSNDATFSPSSEATAAVVAAAAAVPSLPVNHPRAHSSPASLQQSYNAPSPQHLRQQ  
SYDLADEGSLPPGWEMAKTSTGQRYFLNHLTQTTTWTEDPRKKSSGAGPKHHATPPPPHTAAPAALHFKNLGLPL  
DGWEQATTGEGEVYFINHIERTTSWFDPRIPiHLQKPLLQNGSVPGISGSPNQRPPPPQLPGSGNPAAIGGP  
NSPESMNAISAVVAATSSSLTIQQQRQQLRLQQQMERERLKLRRQQEILRQTAFLGNPRNEMLLRRNLTEEILPS  
PTSPPTSDGGVGPPTDPFLGGDFHSRQESADSGLGLGNYSLPHTPEDFLSSMDDSIDAGLNDDPSHQNSELSLD  
GLQGTGIDMGTENMDSDDLVPSSLQEELQGDLLSDMEALLTSSKDSVLTWL PMRLRNLNPASFFQQP

tr:V5GZ01\_IXORI [V5GZ01] SubName: Full=Putative yorkie  
{ECO:0000313|EMBL:JAB69599.1}; 63..77

MSSPSQPNIAAAAAAAAAANSRGDLIEQKGNHIVRIRSDSDINLDDLFKAVMQPSNRVPLSVPMLRNL  
PASFFQQPERSKSSASHSRESSNDATFSPSSEATAAVVAAAAAVPSLPVNHPRAHSSPASLQQSYNAPSPQHLRQQ  
SYDLADEGSLPPGWEMAKTSTGQRYFLNHLTQTTTWTEDPRKKSSGAGPKHHATPPPPHTAAPAALHFKNLGLPL  
DGWEQATTGEGEVYFINHIERTTSWFDPRIPiHLQKPLLQNGSVPGISGSPNQLPGSGNPAAIGGNSPESMN  
AISAVVAATSSSLTIQQQRQQLRLQQQMERERLKLRRQQEILRQTAFLGNPRNEMLLRRNLTEEILPSPTSPPT  
DGGVGPPTDPFLGGDFHSRQESADSGLGLGNYSLPHTPEDFLSSMDDSIDAGLNDDPSHQNSELSLDGLQGTGI  
DMGTENMDSDDLVPSSLQEELQGDLLSDMEALLTSSKDSVLTWL PMRLRNLNPASFFQQP

tr:A0A1Y3BEU9\_EURMA [A0A1Y3BEU9] SubName: Full=Yorkie-like protein  
{ECO:0000313|EMBL:OTF79451.1}; 61..75

MHLKPDSETTNTNNNNNSNNNANGNAIVRVETAADDELDFKAVMSPNDGQSRLPQQVPMRQRRLPP  
SFFRPPSAASSINSLASASHSRESSLDGGYQSQGQTPIASNGQNKINNSPLIGYSAANGLAIHPRANSSPAALP  
PASLNTGSTSGNASLNGGQTFGSNDIKSPNSATNQISHYRQMSYDLQIRLPDGWEMSYTASGERYFLNHKEK  
TTTWTEDPRKKIVEMLRSTPPPPHQPSQQPQQPIIQPSTPTAVPLQASTTPAVVEPEQLSYIDPSIVPLPDGWE  
QAQTSSGDIYFISHVDQTTTWFHPSIPRNLQMKRIQQQTCIQPPPFQNSTNIPPELVVALKNMNTSGQAQAPPV  
AVTATATSTTQNHRLDLELERERMKQRQEELLQSSLLSSTASNIMLSSSSETAASPFLPLPNGCHSRQESFDSG  
LDLGNSSNFMPHTPDNFRRLSNNAQQSSMAAAVVAPTNTPATISDDLAFENMQISGLDLDSESMDFMQGLDM  
DLSNVEELLNSNKDNIMTWL PMRQRRLPPSFFRPP

tr:A0A1Y3B4I1\_EURMA [A0A1Y3B4I1] SubName: Full=Yes-associated protein  
1-like protein {ECO:0000313|EMBL:OTF74823.1}; Flags: Fragment; 46..60

MAENMSHESTMYVAPNPETHFEELFRVVQONANNNSNNNNQOSTNVPMRQRNFPSFFRPPSSSSSASHS  
RDSLLDASFNSNFIVKNISNPSNSAKPPATPIQSNSSHRNGRHVSPSPPFVHQKAHSLPASLSNQKLVTSIINL  
DDNNSKNSVIIISQQQTPPPPPPPQQYRHOQLKLPNHITNSNNNNHFHFRQQSYDIDKIPLPNGWMSFDSNGERY  
FIDHKHKITTTWDDPRIKITQQNFTTLAQTSNSNINHVPFDRQSQQIQPKSI PMRQRNFPSFFRPP

tr:H2Z0P5\_CIOSA [H2Z0P5] SubName: Full=Uncharacterized protein  
{ECO:0000313|Ensembl:ENSCSAVP00000011157}; 34..48  
GHNQIIHVRQDSASELEALFNTVMNPNFKSKSLPMKARNLPKSFFFTQPKPRQTSISSSSDSNTSHASS  
ILAPNANNNGSSVGSVSMAPGSPMNGNISHKSNYPMSPAQRLKASDIPADMPLPAGWSAAKTADGQQYYMNHND  
RSTTWEDPRIPIIKQQRQSQPIYPHLQHISLPPGWEQATTPQGEIYFIDHQTKTTSWVDRPFQGRFYVNQMDMSS  
VGQSRPTMPMPQQQSMLKHLVQEKEHLMRRQLLKQKIHPNPRNFTPTPEISPPQPKFHPNPRNSPQPQKFTPTPE  
IHSPPPFGNPSFHQRDASLDGSGVMGMSNYSLRTPDGFLLNVEEMETGTTQPQSTHHAANQRFDFLDLTPASSV  
DFNGSPVPTSGGQRAGGNMDGSELVPSLQDTLPQDFDVESMLNHVKTENIDNSMIWL PMKARNLPKSFFFTQP

tr:H2Z0P4\_CIOSA [H2Z0P4] SubName: Full=Uncharacterized protein  
{ECO:0000313|Ensembl:ENSCSAVP00000011156}; 34..48  
GHNQIIHVRQDSASELEALFNTVMNPNFKSKSLPMKARNLPKSFFFTQPKPRQTSISSSSDSNTSHASS  
ILAPNANNNGSSVGSVSMAPGSPMNGNISHKSNYPMSPAQRLKASDIPADMPLPAGWSAAKTADGQQYYMNHND  
RSTTWEDPRIPIIKQQRQSQPIYPHLQHISLPPGWEQATTPQGEIYFIDHQTKTTSWVDRPFQGRFYVNQMDMSS  
VGQSRPTMPMPQQQSMLKHLVQEKEHLMRRQLLKQKIHPNPRNFTPTPEISPPQPKFHPNPRNSPQPQKFTPTPE  
IHSPPPFVQLSNPGMDGFMGQGNPSFHQRDASLDGSGVMGMSNYSLRTPDGFLLNVEEMETGTTQPQSTHHAAN  
QRFDFLDLTPASSVDFNGSPVPTSGGQRAGGNMDGSELVPSLQDTLPQDFDVESMLNHVKTENIDNSMIWL  
PMKARNLPKSFFFTQP

tr:H2Z0P3\_CIOSA [H2Z0P3] SubName: Full=Uncharacterized protein  
{ECO:0000313|Ensembl:ENSCSAVP00000011155}; 46..60  
NNDSTPTQTTITQGHNQIIHVRQDSASELEALFNTVMNPNFKSKSLPMKARNLPKSFFFTQPKPRQTSMY  
HHGHSNHFHFRSKSSPASLQMLDVGNTLVKASDIPADMPLPAGWSAAKTADGQQYYMNHNDRSTTWEDPRIPIIK  
QQRQSQVAVMQSQSVSGNLLPPPAHSNPGHNIQTDHVSPTDPHVPSQVNQMDMSSVGQSRPTMPMPQQQSMLKH  
LVQEKEHLMRRQLLKQKHFHPNPRNSPQPQKFTPTPEIHSPPPFVQLSNPGMDGFMGQGNPSFHQRDASLDGSGV  
MGSNYSLRTPDGFLLNVEEMETGTTQPQSTHHAANQRFDFLDLTPASSVD PMKARNLPKSFFFTQP

tr:H2Z0P6\_CIOSA [H2Z0P6] SubName: Full=Uncharacterized protein  
{ECO:0000313|Ensembl:ENSCSAVP00000011158}; 34..48  
GHNQIIHVRQDSASELEALFNTVMNPNFKSKSLPMKARNLPKSFFFTQPKPRQTSISSSSDSNTSHASS  
ILAPNANNNGSSVGSVSMAPGSPMNGNISHKSNYPMSPAQRLKASDIPADMPLPAGWSAAKTADGQQYYMNHND  
RSTTWEDPRIPIIKQQRQTPDTPHVPSQVNQMDMSSVGQSRPTMPMPQQQSMLKHLVQEKEHLMRRQLLKQKIHP  
NPRNFTPTPEISPPQPKFHPNPRNSPQPQKFTPTPEIHSPPPFGNPSFHQRDASLDGSGVMGMSNYSLRTPDGF  
LNVEEMETGTTQPQSTHHAANQRFDFLDLTPASSVDFNGSPVPTSGGQRAGGNMDGSELVPSLQDTLPQDFDVE  
SMLNHVKTENIDNSMIWL PMKARNLPKSFFFTQP

tr:A0A2T7PTI5\_POMCA [A0A2T7PTI5] SubName: Full=Uncharacterized protein  
{ECO:0000313|EMBL:PVD36736.1}; 49..63  
MLVFTSTLHVKGCLLEIVDNGNLAAMPYPRYPSPYIHTPDRVILVPSTPMKLRALPQSFQWQP  
NLAQQV  
SPATMYPLLPCLCNKDTEEDIAEVRPVTTPNESGAETKRLAPERKISVANTDLLFKLFENISDEKKTATVHLKRG  
RPRRMPKISCTKGLLFNDPVLVDAIADTLFPQLSIESSRFGGNTSLQLVTLGTGDKTVTLPSLTLEQNPQMLS  
ELVTHI PMKLRALPQSFQWQP

tr:H2Z0P2\_CIOSA [H2Z0P2] SubName: Full=Uncharacterized protein  
{ECO:0000313|Ensembl:ENSCSAVP00000011154}; 51..65  
MDVDENNDSTPTQTTITQGHNQIIHVRQDSASELEALFNTVMNPNFKSKSLPMKARNLPKSFFFTQPKPR  
QTSMYHHGHSQSVGGLVAPNSVQINHSRSSSSDSNTSHASSILAPNANNNGSSVGSVSMAPGSPMNGNISHKSN  
YPMSPAQRRVAHSAFVNSQGHNSLQIPQVSHSRKSSPASLQMLDVGNTLVKASDIPADMPLPAGWSAAKTADGQ  
QYYMNHNDRSTTWEDPRIPIIKQQRQSQVAVMQSQSVSGNLLPPPAHSNPGHNIQTDHSHISLPPGWEQATTPQ  
GEIYFIDHQTKTTSWVDRPFQGISPQTNNNPPNNSQLQQQLMKVNQMDMSSVGQSRPTMPMPQQQSMLKHLVQEKE  
HLMRRQLLKQLSNPGMDGFMGQGNPSFHQRDASLDGSGVMGMSNYSLRTPDGFLLNVEEMETGDGNRRVHGSQQH  
IGSSTQPQSTHHAANQRFDFLDLTPASSVDFNGSPVPTSGGQRAGGNMDGSELVPSLQDTLPQDFDVESMLNHV  
KTENIDNSMIWL PMKARNLPKSFFFTQP

tr:A0A3B0JPZ1\_DROGU [A0A3B0JPZ1] SubName: Full=Blast:Protein yorkie  
{ECO:0000313|EMBL:SPP73228.1}; 65..79  
MLTTMSTSNNTNIIIEKEIDDEDMLSPIKSSNNLVVRVNQDSTDNLQALFDSVLNPGDAKRPLQLPFRMR  
KLPNSFFTPPAPSHSRANSADSTYDAGSQSNINKSAQPVDVQQPAISQIQPSQQSRLAIHHFRARSSPASLMQNY  
NVRSRSEANPGASSQGPSYESSAEFPNSAANTIELDGMSTCMEGQDMQTVHKKQRSYDVVSPFIQLQSQLGALPP

GWEQAKTNDGQIYYLNHTTKSTQWEDPRIQYRQQOQLMAERIKQSDVLTQTTQTTSTIANSLGPLPDGWEQAV  
TESGDIYFINHIDRTTSWIDPRMQSGLTVLDCPDNLVSSLQIEDNICTNLFNDAQTIVNPPSSHKPDDLEWYKIN  
PFRMRKLPNSFFTPP

tr:A0A3B0JII2\_DROGU [A0A3B0JII2] SubName: Full=Blast:Protein yorkie  
{ECO:0000313|EMBL:SPP73229.1}; 65..79

MLTTMSTSNTNIIIEKEIDDEDMLSPIKSSNNLVVRVNDTDDNLQALFDSVLNPGDAKRPLQLPFRMR  
KLPNSFFTPPAPSHSRANSADSTYDAGSQSNINKSAQPVDVQQPAISQIQPSQQSRLAIHHFRARSSPASLMQNY  
NVRSRSEANPGASSQGPSYPESAEFPNSAANTIELDGMSTCMEGQDMQTVHKKQRSYDVVSPIQQLQSGLGALPP  
GWEQAKTNDGQIYYLNHTTKSTQWEDPRIQYRQQOQLMAERIKQSESGLTVLDCPDNLVSSLQIEDNICTNLFN  
DAQTIVNPPSSHKPDDLEWYKIN PFRMRKLPNSFFTPP

tr:A0A2Y9D1E4\_9DIPT [A0A2Y9D1E4] SubName: Full=Uncharacterized protein  
{ECO:0000313|VectorBase:ADIR016051-PA}; 83..97

MAFNGGAAGGNGSAAAAAAVAAGAGGGGAANNATDENESTGANKKKNLIIIVDKDSNDKLNEL  
FDKTLNKNLPLQIPYRMRKLPESFFMPPSSGSKSPSVSHSRENSADSAFGSGTTILGGVTGVAGVTGPNGLPIHH  
SRAHSSPASLGKIPVGLGGLGGGVVAAAAAAGGNGAGGGGGGGGGGAGSGAAAGSSAAVKSAAAQ  
AAAQNDASSLGAAVLQQAALSKAAIQHLHSRGRSYDVSNLNANFGELEPPGWEQAKTQDGRYYINHNTRTTTWE  
PRIIALQESLQSSVETIYNTGSQTLLSPTISSPTPTNNVFPDAIQMTNDNLAPSNAAPPAAMLTGSNVDLG  
PLPEGWEEGITEKGERYYINHATRSTTWRDPRLSNQDWAVQEQTVRLYNLQLERERLRKRQOEIKSHMGDDPFLS  
GIADHTRQESGDSGLSESSMTQSMPTPEFLSSIDDSMDGLSMTDNTMDTIAFGDNLETPDEFMLDDPLLLEKID  
AVTNLSLMDPTSSKPDNTLYDII PYRMRKLPESFFMPP

tr:A0A0L8FZ90\_OCTBM [A0A0L8FZ90] SubName: Full=Uncharacterized protein  
{ECO:0000313|EMBL:KOF69904.1}; 42..56

MSQQRTEQKGNQVVHVRGDSDSLALFKAAAMPSEVPHQLPLRMRNLPASFFTPPDPTQQKQHSREGS  
TDSTGAGSGSVLNSPGLTIAHPRAHSSPASLAQTMSAAPPSSQHVRQHSYDLTDEQPLPPGWEMAKTNQGHRY  
LK PLRMRNLPASFFTPP

tr:A0A0L8FXC6\_OCTBM [A0A0L8FXC6] SubName: Full=Uncharacterized protein  
{ECO:0000313|EMBL:KOF69030.1}; 67..81

MIENSRNFPSSGNTAFLVPSISATPMPPSLTSFSQSQSMTAPLLTSSIDGALSYSNDKHHPPYPIPLR  
QRDLPASFWQEPNSQTRQCLDHLAAAAGLSHTSLQSRSSSTLSGSSQLASNSFLSSSPMSSNSHFLPFLALYP  
DLMLSNTAFNRYVRRPSQLNPAGDLASSTPLNRLKGGTLNSSIGDAVQQNRLNYPYSAQRTQSRFPITEYLYNMY  
GSKYRYANPVVLQQTPLSEKTWDDVRIKMIANSRSTHSTHEANEKLNKNSKHDDIVNPNINSQIYLKRRR  
SDNHIKSLDDSVLPLLSLQSLQTSSTSSSPTDKNATIKTAGTALSERAADFSRLRLSDCYKSSTKHSPHSRLSDGM  
LFDNSVNDSDQLNARCVCDDVLKDCPNQPKRNNSNLSQTNNGTSVSTATNDNATLATNNSNPGLGFLPY  
FQVFPHLWPPFPPLPPSASLSLAATATARERYLPDNIYAYSNQERSIRLMRPRSTLGARYHPFGDVR  
PLRQRDLPASFWQEP

tr:A0A226EVH2\_FOLCA [A0A226EVH2] SubName: Full=Transcriptional  
coactivator YAP1 {ECO:0000313|EMBL:OXA60841.1}; 51..65

MATGGSGGGLPNGQSHKNQVIHIRGDSSELQALFDSVLAPNANRRPKQVPLRLRNLPDSFFNPPSIGS  
KSPSCSVSHSRENSVDSTLNPNVRRSPLSTAGASHSRAHSSPATLEQTYSVAAALPGLSLSQSGSANNLSDDPLPP  
GWEQACTPEGQIYFINHITRSTTWEDPRKAQTQQILAAIGNGTGSLSSQANHSNGNVIQAVGSAVGPLEGWEQAI  
TPEGEIYFIDHMNRSTTSWFDPRIPMHLQRPQVLQHQINAAALAQASALAAASAAASASSNVNTAVTSAAGTASL  
LNNNTSIQLSRQQEVRLQQLQLERERLKLKRQOEIMQQMEKEQARLRQONRLQQMEDGEIDPFLGGSMVNPSTPSS  
DFHSRQESADSGLMGNSYSLPNTPEDFLSNMDDNMDTISGLFYPRVYYPSETE PLRLRNLPDSFFNPP

tr:U4UWQ5\_DENPD [U4UWQ5] SubName: Full=Uncharacterized protein  
{ECO:0000313|EMBL:ERL94741.1}; 41..55

MARNQDEAKQVVRVDQDSETDLQALFDSVLKPDSCRPLQVPWMSMRKLPDSFFTPPSTGSKSINHSRENS  
VDSAFDVSQVNSVPLQTAHHRHSSPASLQQTAVGQQQPPAHHHIKQRSYDVASKSEDNTPLPPGWQARTPE  
GQVYYLE PWSMRKLPDSFFTPP

tr:A0A1A9Y6J1\_GLOFF [A0A1A9Y6J1] SubName: Full=Uncharacterized protein  
{ECO:0000313|VectorBase:GFUI033359-PA}; 63..77

MSLSKSSANDENKCSVKTTDDSSTTAKTSNNLVVRINQDSDENLQALFDSVLNPHESKRPLQVPFRMRKL  
PNSFFNPPAASPKSPTVSHSRANSVDSAYDCGSQPNINQASVATSLSDLQSTTAVVQQPTTTTITQQQPPPPPE

TQRLQICHSTRAHSSPASLQQSYNLHGNGNISDDATTSFIQQQQQQGDSSTGAVAGTGFTNNMVGFTA AAAAGLNAN  
SIIIGLVNQNANAGATGAGGPLQTYHMKQRSYDVISPIQLQNELGLPLPPGWEQAKTNDGQIYYLNHTTKTTQWEDPR  
IQFKQQQALNAAANARLNKKTGGNAASLLNGDLGPLEGWEQALTETGDVYFINHIDRTTSWNDPRIPIILFQKAV  
KAKNEMSWVNAVEVDKNDNDFKQKTIQKPLNKHNVSLHMDPFLSGDNHARQESSDSGLSLSSNSFAVNTDFITHM  
DSSMDCISENGSIIIDNLDLTTLLQLDNLCMLNDVLSNPSTKPDNLEWYKLN PFRMRKLPNSFFNPP

tr:A0A194QUS4\_PAPMA [A0A194QUS4] SubName: Full=Protein yorkie  
{ECO:0000313|EMBL:KPJ08730.1}; 44..58

MALNSDSEQKSNLVLVRVDQSDSVLQSLFDTVLKPDSCRPLQVPLRMRQLPKSFFNPPSTGSKSPSVSH  
SRENSADSAFGSSSATGAAPVSHSRAHSSPASLQQTYAAGQQTQQAPLHHQHSKQRSYDVGTHMQDDLGLPLPSGW  
EQARTPEGQIYYLKLQVRIQSVVSAIVSRPPRRDRSGRGLKPMRHQSFCHLVNNTPTGVTNMVNNKNSKMNIIIS  
PLRMRQLPKSFFNPP

tr:A0A182R729\_ANOFN [A0A182R729] SubName: Full=Uncharacterized protein  
{ECO:0000313|VectorBase:AFUN001978-PA}; 70..84

MAFNGGAAGGNGSAAAAVAAGAANNASDENESTGANKKKNLIIILVDKDSNDKLNELFDKTLNKLPLQI  
PYRMRKLPESFFMPPSSGSKSPSVSHSRENSADSAFGSGTTILGGVTVGATGPNGLPIHHSRAHSSPASLGKIPV  
GLGGLGGGVVAAAAAAAAAAAAAAAAAGGNGAGGGGGGGGGNSGGGAGNAGASGSKSAAAAAQAQAAAAAAAAQNDASS  
LGA AVLQQAALSKAAIQHLHSRGRSYDVSNLHANFGE LPPGWEQAKTQDGR IYYIK PYRMRKLPESFFMPP

tr:V5GQC1\_ANOGL [V5GQC1] SubName: Full=Yorkie protein  
{ECO:0000313|EMBL:JAB63817.1}; 41..55

MALNQDEAKQEV RVNQDSETDLQALFDTVLKPDSCRPLQVPWSMRKLPDSFFNPPSTGSKSINHSRENS  
VDSAFGGGATAAAPVNSVPLQTAHHRHRAHSSPASLQQTYAVGQQQAPVHHIKQRSYDVASKTEDNTPLPPGWEQAR  
TPEGQVYYLNHTTRTTTWTWEDPRKSLAAQAAAQQHQSAEQLLTAHQISHPQSPNPNTAKVNSDVDLGLPLPEGWEQA  
QTPEGEIYFINHQTRTTTWFDPRIPTHLQQRPA GANLVGSTWHSQALSSSPSKAQQIRLQQLRMERERLQQRQOE  
IMRQQDIMMRSSSDLPVMDPFLSSSLTDHSRQEYRGVVGLVWGQHTRCHTHLKIF PWSMRKLPDSFFNPP

tr:V5I8I0\_ANOGL [V5I8I0] SubName: Full=WW domain-containing transcription  
regulator protein 1 {ECO:0000313|EMBL:JAB63816.1}; 41..55

MALNQDEAKQEV RVNQDSETDLQALFDTVLKPDSCRPLQVPWSMRKLPDSFFNPPSTGSKSINHSRENS  
VDSAFGGGATAAAPVNSVPLQTAHHRHRAHSSPASLQQTYAVGQQQAPVHHIKQRSYDVASKTEDNTPLPPGWEQAR  
TPEGQVYYLNHTTRTTTWTWEDPRKSLAAQAAAQQHQSAEQLLTAHQISHPQSPNPNTTHLQQRPA GANLVGSTWHS  
QALSSSPSKAQQIRLQQLRMERERLQQRQOEIMRQQDIMMRSSSDLPVMDPFLSSSLTDHSRQEYRGVVGLVWGQH  
TRCHTHLKIF PWSMRKLPDSFFNPP

tr:A0A183R065\_9TREM [A0A183R065] SubName: Full=Uncharacterized protein  
{ECO:0000313|WBParaSite:SROB\_0000934101-mRNA-1}; 38..52

MEGYDSRKPPSVRVTVLEDPNSSLQELFNPASQRQVPLHQRNLPKSFFVPPGDVNDNSRLSKLNSVNC  
NERNSTDFVVFHGKANSSPA CLDAALRTSISANVPNHSHQKSLDVASKYKTD FNP DFAFGSGCGPGIFQGGQRNSQ  
QTALLYGPTMTFAISELPVGYDMAINESNQVYFLNHQTQETTWFDPRIPEKFKQWGMTPEELEQVHLRYAKQFLC  
TTPSSNLNVCVQMPFFAQTGIHYVDTYQM QSFSVWLI PLHQRNLPKSFFVPP

tr:T1IUK9\_STRMM [T1IUK9] SubName: Full=Uncharacterized protein  
{ECO:0000313|EnsemblMetazoa:SMAR004835-PA}; 47..61

MSEDELEIHEQKGNHVLHIRGSDSDLEALFKSVINPTDTQVSLIVPMRLRKLKPKSFFKPPETGSRTPP  
QQTSTSSRSLPASGGTTTGLQIHHPRARSSPASLQQSLIPNEPPPQOHARQQSYDISDDLPLPPGWEMSKTLTG  
QRYFLK PMRLRKLKPKSFFKPP

tr:T1JIB8\_STRMM [T1JIB8] SubName: Full=Uncharacterized protein  
{ECO:0000313|EnsemblMetazoa:SMAR013599-PA}; 47..61

MTQQQRDLLEQKCNQIVHIRGSDSDLEALFNAVMPNSDTQVQLTVPMLRKLKLPNSFFKPPNAGSKTLP  
QIQPSSPAALSREANPESSIPSPPTTSAGLQIHHLRAHSSPASLTQNI VAPAQHQLRQQSYDITDDIPLPPGW  
EMARTTSGLR YFLK PMRLRKLKLPNSFFKPP

tr:A0A369SJ87\_9METZ [A0A369SJ87] SubName: Full=Transcriptional  
coactivator YAP1 {ECO:0000313|EMBL:RDD46562.1}; 35..49

MDQKQPVVHERHDSKEELERL FNVLNSQNNPTVPMRDRRLPY SFFQGPTRPYDSNNTTATLSTDNFNG  
VGDSIVHPRIKSSPASFPYHNNSDMTNSNNSAFQHRNQPLHPKHSSSAAFRNENAHSNKSF PADVNYKNLNP  
NVAMRQLPMASPVQQNGLHIRGGSGSGLHPNNGPMQAKLPDGWEKAFTPEGQVYFVNHITRTTTSWNDPRRSMMQA

QSPNPVIQSPLKTTYDLPNDKAMQELQMMQLERKHLEQKREEMLRKESEIKRQIETYQRQQIPVGRTEQLLHRPG  
LATTAAPNGIPNHNPLIKREPSSPSPMQIDYPTPQHNSLPTDIQANLSQGMNLNRYGGNINISINNQLANGGFNNQ  
IISENNEPDIIEELIQSLSTSAQDLIDIEATLIDRDIAKIESDLVNTPEPDWY PMRDRRLPYSFFQGP

tr:A0A154P2I5\_9HYME [A0A154P2I5] SubName: Full=Yorkie like protein  
{ECO:0000313|EMBL:KZC06149.1}; 46..60

MALNQDVDQLSKSNLVVRMDQNSESDLQALFDSVLKPDSCRPLQVPLMRNLPSFFNPPSTGSKSPSI  
SHSRENSADSAFGTAPGAGAVAAAAAAGLTVAHRAHSSPASLQQTYSASAQQAPQHAPQPHARHHHHQKQRSYDV  
ISTVDDLGLPLPHGWEQARTPEGQIYFLNHLTRTTTWEDPRKTAATAANVAAVAAAVDNGKTTSAATNSLGLPLPDGW  
EQARTPEGEIYFINHQTRTTSWFDPRIPTHLRAPTSGAMLPQNWLQOPTGGGIQSNQTLQACQQKLRQLQSLQME  
RERLQKRRQEIIMRQQLMLRQSTTTDAAMDFFLSGINEQHARQESADSGGLGGSAYSLSLPHTPEDFLANIDDNMDGT  
SDGGAPMETPDLSTLSDNIDSTDDLVPSSLQLEDFSSDILDDVQSLINPNTTKPENVLTWL  
PLMRNLPSFFNPP

tr:A0A2A4J152\_HELVI [A0A2A4J152] SubName: Full=Uncharacterized protein  
{ECO:0000313|EMBL:PCG65254.1}; 44..58

MALNSDAEQSKSNLVLRVDQSDSVLQSLFDTVLKPDSCRPLQVPLMRQLPKSFFNPPSTGSKSPSVSH  
SRENSADSAFGSSSATGASPVSHSRAHSSPASLQQTYAAGQQNQPPPLHHQHTKORSYDVGTHIPDDLGLPLPPGW  
EQARTPEGQIYYLNHIKTTTTWDDPRKTLAAQSVAGSVQHQSTDALLTQAASPQNIPTPAPAAKSTSSNTTDP  
LGPLPEGWEQAATAEGEIYFINHAARTTSWFDPRIPQHLQRTPAAGGAVPDGGWANASLQACQQKLRQLQSLQLER  
ERLQKRRQEIIRLQQLIMARQSSSIVSSLANSTGVASTDLPLDFLSGLSDHQEQESADSGLGMGVPHSYSPHPT  
PEGFLAGMDDRMDCSTSEAGANLDSTDITLADNLDSTDDLVPSSLQLENEFTNDILLDDVQSLINSTPSKPDNVLTWL  
PLMRQLPKSFFNPP

tr:E9IY16\_SOLIN [E9IY16] SubName: Full=Uncharacterized protein  
{ECO:0000313|EMBL:EFZ14541.1}; Flags: Fragment; 47..61

MALNQDVVDQLSKSNPVVRVDQNSESDLQALFDTVLKPDSCRPLQVPLMRNLPSFFNPPSTGSKSPS  
ISHSRENSADSAFGVAVTGGTPNGGGGAGGSGVGTGTGSGNAGAGGGANGTANAIAAAAAVAAAAGLTVSHRAH  
SSPASLQQTYASAQQAPQHAPQPHARHHHHQKORSYDVIAPTVDLGLPLPTGWEQARTQEGQIYFL  
PLMRNLPSFFNPP

tr:A0A1B0FBE8\_GLOMM [A0A1B0FBE8] SubName: Full=Vismay  
{ECO:0000313|VectorBase:GMOY000857-PA}; 63..77

MSLSKSSANDENKCSVKTTDDSSTTAKTSNNLVVRINQSDSDENLQALFDSVLNPHESKRPLQVPPFRMRKL  
PNSFFNPPAASPSTVSHSRANSVDSAYDCGSQPNINQASVATSLSDLQSTTAVVQQPTTTTITQQQPPPPPPP  
ETQRLQICHSRAHSSPASLQQSYNLHGGNISDDATTSFIQQQQPQGDGSGTGTVAGTGFTNMMVGFATAAAAAAGL  
NANSIIGLVNQANAGASGSGGPLQTYHMKQRSYDVISPIQLQNELGPLPPGWQAKTNDGQIYYLNHTTKTTQWE  
DPRIQFKQQALNAAANARLNKTTGGNAASLLNGDLGPLPEGWEQALTETGDVYFINHIDRTTWNDRIPILFQ  
KAVKAKNEMSWVNAVEVDKDNDFKQKTIQKPLNKHNVSLHMDPFLSGDNHARQESSDGLSLSSNSFGVNTDFI  
THMDNMDCISENGSIIIDNLDTTQLNDNICMLNDVLSNPSTKPDNLEWYKLN PFRMRKLPNSFFNPP

tr:A0A224YXB1\_9ACAR [A0A224YXB1] SubName: Full=Protein yorkie  
{ECO:0000313|EMBL:MAA22247.1}; 59..73

MSSSPSQPNNGAATNTRGEMIEQKGNHIVRIRSDSDINLDDLKAVMQPSDRVPLSVPMLRNLNPASF  
FQQPDRSKSASHRESSSDATFSPSEASAAAAAATAVAAPPSPVNHRAHSSPASLQQSYNAPSQHLRQQ  
SYDLVDDLPPGWEMAKTSTGQRYFLNHLTQTTTWDDPRKKTPSNKHATPPPPHTAAPPAGPFKNLGLPLPDGWE  
QATTAEGEVYFINHIERTTSWFDPRIPAHQAQKPLLSHASPLPGAQSQSGNAVSTGPTSPDTMNSISAVVAA  
TSSLTLLQQRQKMRLLQQLQMERERLQKIRQEIILRQTAFLGNSARNEMMLRRTLTEEILPSPTSPTASDVAGVGP  
TTDPFLGGDFHSRQESADSGLGLGPNYSLPHTPEDFLSSMDDSIDAGLNDDPNNQNSELSLDGLQGTGIDLGTEN  
MDSDDLVPSSLQEEELQGDLLSDMEALLTSSKDSVLTWL PMRLRNLPAFFQQP

tr:A0A2R5LJ54\_9ACAR [A0A2R5LJ54] SubName: Full=Putative transcriptional  
coactivator yap1 {ECO:0000313|EMBL:MBY09455.1}; Flags: Fragment; 41..55

DVIEQKGNHIVRIRSDSDINLDDLKAVMQPSNRVPLSVPMLRNLNPASFFQQPERSKASHSRESSS  
DATFPDTAGPPLAINHRAHSSPASLQQTYSSPQQHRLQRSYDLADEASLPPGWEMAKTATGQRYFLNHLTQTT  
TWEDPRKKTGGSKQTPPPPPHTAAPPVLPNFKNLGPLPDGWEQATTSEGEVYFINHIERTTSWFDPRIPHLQK  
PSLQGTSAQPSEGNADISAVVAATSSLTIIQQRRQKLRLLQQLQRRERERLQKIRQEIILRQTAFLGNPARNQEMLLR  
RTLTEEILSNPTSPSDPFLGGDFHTRQESADSGLGLGPNYSLPHTPEDFLSTMDDDSTMDGLNDDASQRDISLESLSQGTG  
LDLGAENMDSDDLVPSSLQEEELQGDLLSDMEALLTSSKDSVLTWL PMRLRNLPAFFQQP



tr:A0A224YX93\_9ACAR [A0A224YX93] SubName: Full=Protein yorkie  
{ECO:0000313|EMBL:MAA22248.1}; 59..73

MSSSPSQPNNGAATNNGRGEMIEQKGNHIVRIRSDSDINLDDLFKAVMQPSDRVPLSVPMRLRNLPAASF  
FQQPDRSKSASHSRESSSDATFSPSEASAAAAA AVAAPPSLPVNH PRAHSSPASLQQSYNAPSQHLRQQ  
SYDLVDDLPPGWEMAKTSTGQRYFLNHLTQTTTWDDPRKKTPSNKHATPPPPPHHTAAPPAGPFKNLGPLPDGWE  
QATTAEGEVYFINHIERTTSWFDPRIPAHQAQKPLLSHASPLPGAQSQSGNAVSSTGPTSPDTMNSISAVVAA  
TSSLTLQQQRQOKMRLQQLQMERERLKIQQEILRQTAFLGNSARNEMMLRRTLTEEILPSPTSPTASDVAGVGP  
TTDPFLGGDFHSRQESADSGLGPGNYSLPHTPEDFLSSMDDSIDAGLNDDPNNQNSELSLDGLQGTGIDLGTEN  
MDSDDLVPQLSTNFFVGLSPF PMRLRNLPAFFQQP

tr:A0A0L7LBH0\_9NEOP [A0A0L7LBH0] SubName: Full=Uncharacterized protein  
{ECO:0000313|EMBL:KOB72745.1}; 44..58

MALNSEAEQKSNLVLVRVDQSDSVLQSLFDTVLKPD SKRPLQVPLRMRQLPKSFFNPPSTGSKSPSVSH  
SRENSADSAFGSSSATGASPVSHSRAHSSPASLQQTYAAAGQQNQQQPPLHHQHAKQRSYDVPHIPDDLGLPLPPG  
WEQARTPEGQIYYLK PLRMRQLPKSFFNPP

tr:A0A3Q0KCM0\_SCHMA [A0A3Q0KCM0] SubName: Full=Uncharacterized protein  
{ECO:0000313|WBParaSite:Smp\_014840.1}; 38..52

MEGYDSRKPPSVRVTVLEDPNSSLQELFNPASQRQVPLHQRLPKSFFVPPGDVNDNSRLSKLNSVNC  
NERNSTDFVVFHASKANSSPACLDAALRTSISANVPNHSHQKSLDVASKYKTD FSPDFAFSGSCGPGFFQQRNSQ  
QTALLYGPTMTFAISELPVGYDMAINESNQVYFLNHQTQETTWFDPRIPEKFQKWGMTPEELEQVHLRYAKQFLC  
TTPSSNLNVCVQVDRISPSPVPTACVSASSPSGFLSKNQSGVPSPMVVISVSPNSSTSGPLPHNLPLSSSST  
CTNVQNRRLRSTTAVNNNNNNNNNNNGNNGNQNIAANHRAHPNQLPYPHHQHSHQVNEQLQTSGGIQHQHQHSQ  
LPVQSQPTSQSLVTHFRSCSQPVSMSSGRDCGSSTGIILSSNSSGVSTATTTVTGTLGHTQLRIPGSLSGILSS  
SSLTGLCGSNVNTGQQGCVTGSI STSSGQLVQGLECLRLNASVTSTNALNNSNHVLLDQQQIPKTQRVQQPQFIL  
SASSGIVYGSNINAAAARLVGTVLPNTPQPGNQSHSHQSSMDSGVGQSLTGQSNPSANQTPHEHTVMLFCDPISIGAC  
GAEHMEGIAYPNEELICTGFNDFDNIDISDMST PLHQRLPKSFFVPP

tr:A0A195E7L9\_9HYME [A0A195E7L9] SubName: Full=Yorkie like protein  
{ECO:0000313|EMBL:KYN20824.1}; 46..60

MALNQDQDQLSKSNPVVRVDQNSESDLQALFDTVLKPD SKRPLQVPLRLRNL PDSFFNPPSTGSKSPSI  
SHSRENSADSAFGAAVPATPNGDQKQRSYDVI STVDDLGLPLPHGWEQARTPEGQIYFLNHLTRTTTWEDPRKTA  
AASVAAVA AVAVESSKSNALGPLPDGWEQARTAEGEIYFINHQTRTTSWFDPRIPSHLQRTPASGAML PQNWQLQQ  
PTGIQSNQNLQACQKQKIRLQSLQLERERLKRQEQEIMRQQQEMMLRQSTTDAVMDPFLSGINEHARQESADSG  
GLGSAYSLPQASDDFLNIDENMDGTS DGGAPMDTPDLSTLSDNIDSTDDLLPSLQQLNEEFSTDLDDVQSLINPN  
TTKPENVLTL PLRLRNL PDSFFNPP

tr:A0A1B1JCF7\_SACKO [A0A1B1JCF7] SubName: Full=Yes-associated protein  
1-like protein {ECO:0000313|EMBL:ANS11592.1};>gp:KU359113\_1 [KU359113] yes-  
associated protein 1-like protein [Saccoglossus kowalevskii] 45..59

MTMDPKGHQIVHVRGSDTDLEDLFRAVMNPTGIVKEPLPQHPVPLRMRKLPPSFFKEPKPMASSPSG  
SHSRESSTDNPPGGPFGAQTGLPLVNH PRAHSSPASLQQMQAAAASQQQQQTVTPQHTRHTSYDVTTIEDLPLP  
PGWEVARTPSGQRYFLNHMDQTTTWNDRKNTQAQLAQLQQAQARALLQQQQPQQQQPDLGLPATWEQAS  
TPEGLRATAGQTVGLSGTQLNRNQIQQALQQQQLQAQQQGPLSRQQQHPQKERLQQQLQLERELRRRQLEIQQQ  
EMLIRKEIVGEDGQPVSKSNQSQDREMTSVSTTGVDPFLLSGGTYHSRDESGDSGLGMSSNYSLPRTPDMLSNV  
DEMDTSDGERKPDMAATPIQTPMNDYLESMQGTNVDIGSLEDEEGDDLVPQLQALSSDILTDVEAVLSPHKIE  
NFLTWL PLRMRKLPPSFFKEP

tr:A0A195CJ14\_9HYME [A0A195CJ14] SubName: Full=Protein yorkie  
{ECO:0000313|EMBL:KYN00059.1}; 47..61

MALNQDVVEQLSKSNPVVRVDQNSESDLQALFDTVLKPD SKRPLQVPLRMRNL PDSFFNPPSTGSKSPS  
ISHSRENSADSAFGAAVPATPNGGSVPNGGTNGTANAIAAAA AVAAAAGLTVSH PRAHSSPASLQQTYASAQQAP  
QHAPQPHARHHHQKQRSYDVI STVDDLGLPLPHGWEQARTPEGQIYFLK PLRMRNL PDSFFNPP

tr:A0A182M3F8\_9DIPT [A0A182M3F8] SubName: Full=Uncharacterized protein  
{ECO:0000313|VectorBase:ACUA008517-PA}; 70..84

MAFNNGAAGNGSAAGAVAAGAANNASDENESTGANKKKNLIILVDKDSNDKLNELFDKTL SNKLPLQI  
PYRMRKLPEFFMPSSSGSKSPSVSHSRENSADSAFGSGTTILGGVTGVATGPNGLPIHHSRAHSSPASLGKIPV

GLGGLGGGAVAAAAAAAAAAAAAAAAAGGNGAGGGGGGGGGGGGAGNNAGASGSKSAVAAAQAAAAAAAAAQNDA  
LGA AVLQQAALSKAAIQHLHSRGRSYDVSNLHANFNGELPPGW EQAKTQDGR IYYIK PYRMRKLPESFFMPP

tr:A0A3M7PAX5\_BRAPC [A0A3M7PAX5] SubName: Full=E3 ubiquitin-ligase  
BRE1A-like {ECO:0000313|EMBL:RMZ96251.1}; 341..355

MDDSKSQLPTVQPQVRKLYFKSSATEALHSAILLKSRSNQS KSHVTKMPSIGTAATPKTESDDHELES  
PLKIKENLQTS AKTIKSGLDMLRSSSDEEDSHSDNLERKKPDIILLDINKSLRKRKKEEALSNSSSDEEDSSLRT  
NKQTS LNLNLKPIGNKPPYITPVVSANY SANYLDNELVASPNLSLSPSGFSSPHSVKSQKSCSDQEFSSSLASIS  
SPTSCCSSLT TNDGLLDFDDSSSTASGPVYVRQPGFEHHAHEVLKQDVKLNLNKNFVINDKSKSKFQKKNLNGSSS  
TGALVENCEAKPKAKKCMVMNPDYLTENSESSIMLKPIRQKREPLPLRLRALPASFWEQPNLNPISPATMYLPP  
LHRNEIENDLGEHLNEDYVHSSSVLRERERVSPANTELLFKLFDNIEQCKDKKQVQLILNSRSHSKVKAMTKAL  
IKGEDPCIQDAEGLFPQLKLD SKTETNYISNSVSSSNLPLIEQNYSQLSEIVASL PLRLRALPASFWEQ

tr:A0A2L2YT68\_PARTP [A0A2L2YT68] SubName: Full=Yorkie-like protein  
{ECO:0000313|EMBL:LAA11274.1}; Flags: Fragment; 48..62

MSQQRDVIEQKQGHNKILRIRGDSETNLDDL FNAVMPKGNQAHQSKPMRSRNLPKSFFQPPERGSKSA  
SHSRESSTDN TFSPPPPQV PQSNNNNNNRSAASPGISNSNNAVSPPPAHPNGLVINHPRAHSSPASLQQTYNAA  
QHQLRQQSYDITDIIPMPAGWEMARTENGORYFLNHLTKTTTWEDPRKNLSTGSLSSSSGVTSLSPSTSPASSL  
INLQLVNNLAQG PLPDGWEQATTPDNEIYYINHRQTTSWYDPSLPPQLQNTPVVPI LGYGAHSQSVLGLSSQQS  
QASAASVT TSLTAASNQTLQOQQOQLRLQLRLOMERERLRLRQOEILRNSNLGNSSPTLNEYLMRKTLOEEGVANS  
SSSNRHTDASQSNSTNLDPFISAD PMRSRNLPKSFFQPP

tr:A0A2B4S6G3\_STYPI [A0A2B4S6G3] SubName: Full=Protein **FAM181B**  
{ECO:0000313|EMBL:PFX24075.1}; 244..258

MKHCRNDTSGISSLSDEKGNKVSAPDQLANILNTQFQSVFSIEIPAPQDLLPPI SPFPRMPDILISKSG  
VLKLLQELKVHKADGPDQEMNSLGEESVATPTSLNFVSNATSALKFALDKPIKPKRKVNHRKYLQRQLSGRSSS  
AATSSFDGSWISQGEILFDHVLKSGQRGSASAVARA EKSSTAIPWKNRSEETQALGTDNVLDFVQKRAQKKEKN  
WKITRSQQINDTKTSQALFSQPSQPLKRRKLPE SFWTEPSPKASRKPLQATRNSKTNLATNELQRSELEILDWLR  
PELDDFIERWSESEECASNSSRPDSLSDSPSTIDPHSPYSDESENVGLMDEFFEQRVPFSDSSTKNGECTSNI  
PSTRNYANANIN FVNNRTYNVPQDYVQRPLNHSVSCYGGQYGF SANNEWSANPVQP NYFETGYNVLS  
PLKRRKLPE SFWTEP

tr:A0A210QKD5\_MIZYE [A0A210QKD5] SubName: Full=Yorkie-like  
{ECO:0000313|EMBL:OWF49209.1}; 43..57

MSQDQTERKGTQVVHVREDSGSELDALFNAV MNPKSGQSGQIPLMRNL PASFWKPPDQQRVQHMKQ  
GSNDSTGGYPGHPGSGVGSQGNLQIAHMRAHSSPASLQQTLSTVPQGPQAPAHARQHSCDALLDNEPLPPGWE  
IAKMPDQGRYYLQKNPPPDI FNKASSPNSNHLTQSTTWQDPRKAVSTTALNSQQSPSSQQSPNVSMQNLNLDL  
PQGWEQASTPEGDIYYINHHERTT SWYDPRIPERMROQARINSVGPQGRQMGQLAPPPQHPQONGGTQRSQQ  
ANLQFSKLOMEKERLRKRQEEIARQQQLQOQQOQQQDAIPVSQSINISQANEMTSVTD PFLGQTNSSDHSRQES  
TDSGVGGMGTGTNY SMPRTPEDFLSNVDEMDTQEGGHRQGD FNNMDIGGNIGESGEP SNMDS EDLVPSLQEDISN  
ELLNDMENVLNSNKLEDNLLTWL PLMRNL PASFWKPP

tr:A0A1L8DHT7\_9DIPT [A0A1L8DHT7] SubName: Full=Putative transcriptional  
coactivator yorkie {ECO:0000313|EMBL:JAV06022.1}; Flags: Fragment;  
102..116

DCVWDFCTTNPWNCASARDSVISWKAESGCFRTLAMALNNSNSGSSNNLSNTPNNNNNESENVKQGN  
LVVRMEDEDSATKLQALFDTVLK PSEQNRPLQIPLMRKLPNSFFNPPSTGSKSPSVSHSRENSIDSAFGSGTTIV  
YAPGGGASGAANSVLTQRLSISHSRAHSSPATLEQTHAASLKSA AAAASVATANAAQNTQAQPQTPLKAVHASQR  
SYDVISAIQLQDELGLDLP GWEQARTAEQIYYLNHNTRTTQWEDPRKQLAAHQALVSHQSADSLRSQPPQQQQ  
PPIQQNSGNPVTKLSSATSVSSDLLGLPLD GWEQAVTSAGETYFINHFNRTTSWFDPRIPEHFQRSEMSRTAGG  
WLNHNLEKEREY LKQRQOEIQHQTMGLQMDPFLPGVTDHSRQESSD SGLSLTSNHYSLPQNSDFMSVDDSDMDCI  
SESGTLETSTLENTDDLVP SLQLGEGFNNDILDDVHSLMDSEVKTD SLTWI PLMRKLPNSFFNPP

tr:A0A1L8DFT9\_9DIPT [A0A1L8DFT9] SubName: Full=Putative transcriptional  
coactivator yap1 isoform x1 {ECO:0000313|EMBL:JAV05247.1}; Flags: Fragment;  
102..116

DCVWDFCTTNPWNCASARDSVISWKAESGCFRTLAMALNNSNSGSSNNLSNTPNNNNNESENVKQGN  
LVVRMEDEDSATKLQALFDTVLK PSEQNRPLQIPLMRKLPNSFFNPPSTGSKSPSVSHSRENSIDSAFGSGTTIV  
YAPGGGASGAANSVLTQRLSISHSRAHSSPATLEQTHAASLKSA AAAASVATANAAQNTQAQPQTPLKAVHASQR

SYDVISAIQLQDELGLDPPGWEQARTAEQGIIYYLNHNTRTTQWEDPRKQLAAHQALVSHQSADSLRLSOPPPQQQ  
PPIQQNSGNPVTKLSSATSVSSDLLGLPLPDGWEQAVTSAAEHFQRSEMSRTAGGWLNIHNLEKEREYLKQRQQE  
IQHQTMGLQMDPFLPGVTDHSRQESSDSGLSLTSNHYSLPQNSDFMSVDDSMDCISESGTLETSTLENTDDLVP  
LQLGEGFNNDILDDVHSLMDSEVKTDLSLTIW PLRMRKLPNSFFNPP

tr:A0A1L8DFM1\_9DIPT [A0A1L8DFM1] SubName: Full=Putative transcriptional  
coactivator yap1 isoform x1 {ECO:0000313|EMBL:JAV05248.1}; Flags: Fragment;  
128..142

LCRNAKVSDRKKKSVEHRKGFRETLETVCGIFFCTTNPWNCASARDSVISWKAESGCFRTLAMALNNSN  
SSGSSNNLSNTPNNNNNESENVKQGNLVVRMEDSATKLQALFDTVLKLPSEQNRPLQIPLRMRKLPNSFFNPPST  
GSKSPSVSHSRENSIDSAFGSGTTIVYAPGGGASGAANSVLTQRLSISHSRAHSSPATLEQTHAASLKSAAAAA  
VATANAAQNTQAQPQTPLKAVHASQRSYDVISAIQLQDELGLDPPGWEQARTAEQGIIYYLNHNTRTTQWEDPRKQ  
LAAHQALVSHQSADSLRLSOPPPQQQPPPIQQNSGNPVTKLSSATSVSSDLLGLPLPDGWEQAVTSAAEHFQRSEM  
SRTAGGWLNIHNLEKEREYLKQRQQEIQHQTMGLQMDPFLPGVTDHSRQESSDSGLSLTSNHYSLPQNSDFMSV  
DSMDCISESGTLETSTLENTDDLVPVSLQLGEGFNNDILDDVHSLMDSEVKTDLSLTIW PLRMRKLPNSFFNPP

tr:A0A0K2UK18\_LEPSM [A0A0K2UK18] SubName: Full=Putative LOC100881892  
[Megachile rotundata] {ECO:0000313|EMBL:CDW38385.1}; 163..177

MSCATAPVMYQPYSPYNNSSPSATMPPQGFHSSPDRVPPSQQSGIVEDNNNRSHLENKHHVQQVFKVEH  
LHSTPPQDLSSYQPNVSNNTSSCNNSQSSPPTSRPPSHLNQHDDESDSTISAHRLSSNIVVFTHYVGNASSVVE  
DHFSRALSSYERDETSYKPMASARNLPASFWTAPSDYTPPSPRHSASATACNLLNQSSTVPYGDYIPESITGALHQ  
LAADWQYPHASVGHTPSSSSYSNYSNYAARFQSANYWSPRLVGSSTTSSVKSEWSPEPPYSDFSSPHHLSHH  
PYHHYSNIAAVALGLESNPSSDASLVNKPHTTAPGPATTAGTDLFWTTTF PMSARNLPASFWTAP

tr:A0A2G8K7X8\_STIJA [A0A2G8K7X8] SubName: Full=Uncharacterized protein  
{ECO:0000313|EMBL:PIK44110.1}; 93..107

MGNRYGRSVSSEQNDYQKEKSTQGGKYEITPPCKRRKISGNFEVDKTFHVSKDDVVARATCSPKAERAP  
CTKDKDANFSTTNDKTDSATNPLPLRKRRLPASFWQEPGKSEIKPPIKVESSPRQTAFLPISPRQSSSFGRYVKD  
FLGSNLSASEKLELLRLNSLERDSYNHLCTREISGRRCPSYPCVLMHCKNQHEEIHFRDFPPFYPRNDYPFLHP  
TQGASLPFPARNAFSSNHERHANVVGMPYPPSPFPYYPDLLRHNEVIDSNYGSRFIFPMETNVSPFLPSSHFNP  
SVVRPVPKHLNISRFSFHSFDVR PLRKRRLPASFWQEP

tr:A0A2G8L677\_STIJA [A0A2G8L677] SubName: Full=Putative transcriptional  
coactivator YAP1 isoform X1 {ECO:0000313|EMBL:PIK55763.1}; 48..62

MTSVDMVDAEDRKTQVISHMKGDSATELEHLFQRLVHPSADKEELPKPMKERNLPPSFFSQPGPRLSPN  
GNHRRDSSQDESHYSDSPTDSGITSPPSGPQSLSTHGLNIVHQRRARSSPAILQEMRSAVGQQLQVQHLKQQSYD  
ITDNADILSSIPLPPGWEVAHTPNGQQYFLE PMKERNLPPSFFSQP

tr:A0A2G8LFH1\_STIJA [A0A2G8LFH1] SubName: Full=Uncharacterized protein  
{ECO:0000313|EMBL:PIK58900.1}; 234..248

MANRRPRVRRLAPSWGLSAVLHALAGPPYEPMANASLAALTKKTLFLIAVASARRRSLHALTTPKNHI  
RFEGHGVMPDPAFIAKNQALTFPLPGDIFIPEIKTLSSVAEDKRWCPVRALKWYLSRTEKLRQTTSLFILPRP  
YTSASKDTLSRWLVETIRPFTTGAARPRAHDIRGISASTALFAGIPIEDILKAAAWKTPTTFVACYLTDTLHAEA  
AFGSAMVRGPADPLPMKLRALPQSFQQPNSVNTMSPGNMYLPVLPPLCKSEHSNVDPSEIRPISPTLEDDMTRP  
KLEDHNYTTMEVHPKTSILNNNSNKVKDRNSESYTVESTGKSVLSSPRERDLFLCKDSVQESSSPLVRRRHHHPGR  
PTARILKVSPASQELLMKLFEGVEGGEKGPVKVTGPNI PRKFRQRQDSKLSQPTSNKHLIKDPYMINAVTDGLLP  
MLSLETISKQSTAPSSQLALVALKAGDKTLTLPVSLVEQNYPAVLSELVKAL PMKLRALPQSFQQP

tr:A0A1Y1JY79\_PHOPY [A0A1Y1JY79] SubName: Full=Uncharacterized protein  
{ECO:0000313|EMBL:JAV54274.1}; 42..56

MALSQDESSKQVVRVDQDSETDLQALFDSVLKPDSCRPLQVPWSMRKLPDSFFNPPSTGSKSINHSREN  
SVDSAFGSSSGGGSGTGATAVSTVPLQNQHHRHRAHSSPASLQQTYAVGQQTAPSHHHVKQRSYDVATKSSDSTP  
LPPGWEQARTPEGQVYYLNHLTRTTTQWEDPRKTLVTQAAVQQHQSAAEQLLPAHQVAQSQSPTQSSACTAQHLQRT  
PGGTSILQQPWQHTSTLSPQSSPAKQQQLRLQLLQLERERLQQRQQEIRRQQELMLRGSNTELPMDPFLSSSLTDH  
SRQESADSGLMGTTYSMPHTPEDFLSNMDDNMDVASESHTMDTPDISSLSDNIDSTDDLVPVTLQLGEEFPNVML  
DDVQSLINAPTTKPDNVLWL PWSMRKLPDSFFNPP

tr:A0A1Y1K3R9\_PHOPY [A0A1Y1K3R9] SubName: Full=Uncharacterized protein  
{ECO:0000313|EMBL:JAV54275.1}; 42..56

MALSQDESSKQVVRVDQDSETDLQALFDSVLKPDSCRPLQVPWSMRKLPDSFFNPPSTGSKSINHNSREN  
SVDSAFGSSSSGGGGSGTGATAVSTVPLQNQHHRHRAHSSPASLQOQTYAVGQQTAPSHHHVKQRSYDVATKSSSEDSTP  
LPPGWEQARTPEGQVYYLNLHTRTTTTWEDPRKTLVTQAAVQOQHQSAAEQLLPAHQVAQSQSPTQSSACTAKANTDV  
DLGPLPEGWEQAQTPEGEIYFINHQSRRTTSWFDPRIPQHLQRTPGGTSILQQPWQHTSTLSPQSSPAKQQQLRLQ  
LLQLERERLQKQOQEIRRQOELMLRGSNTELPMDPFLSSSLTDHSRQESADSGLGMGTYSMPHTPEDFLSNMDDN  
MDVASESHTMDTPDISSLSDNIDSTDDLVPRTLQLGEEFPNVMLDDVQSLINAPTTPKPDNVLWL  
PWSMRKLPDSFFNPP

tr:U3FU04\_CALJA [U3FU04] SubName: Full=Protein **FAM181B**  
{ECO:0000313|EMBL:JAB51546.1}; 218..232

MAVQAALLSTHPFVFPFGGGSPDGLGGAFGALDKGCCFEDDETGMPAGALLSGAEGGDVREATRDLLSF  
IDSASSNIKLALDKPGKSKRKNVNRKYLQKQIKRCSGLMGAAAPGPPSPSAADTPAKRPLAAPGAPTVAAPAHSK  
AAPRREASQAAAAASLQSRSLAALFDSLHRVPGGAEPAGGAVVTPAAGLGAGGAGGDAAGLAGGAAVPGAKKVP  
RARNLPPSFFTEPSRAGGGCGSPGPDVSLGDLEKGAEEFFELLGPDYAGGTEAAVLLAAEPLDVFPTGASVLR  
GPPELEPGLFEPFPAVVGNNLLYPEPWSVPGCPPTKKPPLTVPRGGLTLNEPLRPLYPAAADSFGGEDGPGHLASF  
APFFPDCALPPPPPHQVYPDYDYSAGYSRTAYSSLRPDGVEGEPGEEGAHRDPLRARNLPPSFFTEP

tr:D2HNZ1\_AILME [D2HNZ1] SubName: Full=Family with sequence similarity  
181 member A {ECO:0000313|Ensembl:ENSAMEP00000020920}; Flags: Fragment;  
159..173

QVSSVFPFGAASHPQSPRSSWKAPCSGPLVMASDSVDMKMLLNFNVLASSDIKAALDKSAPCRRSVDHRK  
YLQKQLKRFSQKYPRLPRLPGRPLPGRGAETHLRGADHRPGRPLPGLPGLPGRGAEPYLRKRGSEDRPGRLLLD  
LQRQNPAAARPGQVPMRKRQLPASFWEEPRTHTSYPLGLEGGGLGREGPPYEGKKHKKGLEPLDPEMAPVPASPR  
ALAEKEPLKMSGVSLVGRVNAWSSCCPFQYHGQPVYAGPPGALPQSSVPLGLLWRKSPAPPGELAHFCKDVGPGQ  
KVYRPVVLKPIPTKPAVPPPIFNVFGYL PMRKRQLPASFWEEP

tr:H2NM42\_PONAB [H2NM42] SubName: Full=**FAM181A** isoform 2  
{ECO:0000313|EMBL:PNJ33980.1}; SubName: Full=Family with sequence  
similarity 181 member A {ECO:0000313|Ensembl:ENSPPYP00000006927};  
191..205

MPLERPSGERNDAHTKHRPGEKRASTAKQVSSVPFLGAAGHQQLPSSWKASCSPGLVMASDSV  
KMLLNFNVLASSDIKAALDKSAPCRRSVDHRKYLQKQLKRFSQKYSRPLPGRPLPGRGAEPYLRKRGSEDRPGRLLLD  
LGPDSSPGGGGCKEKALRNPNYREECLAKEQLPQOQHPEAAQPGQVPMRKRQLPASFWEEPRTHTSYHVGLGGL  
GPREGPPYEGKKNCKGLEPLGPETTPVPMSPRALAEKEPLKMPGVSLVGRVNAWSSCCPFQYHGQPIYPGLPLGTL  
QSPVPSLGLWRKSPAPPGLTHLCKDVGDLGQKVCRPVVLKPIPTKPAVPPPIFNVFGYL  
PMRKRQLPASFWEEP

tr:A0A2F0B0K3\_ESCRO [A0A2F0B0K3] SubName: Full=Uncharacterized protein  
{ECO:0000313|EMBL:MBV96545.1}; Flags: Fragment;197..211

MPAAWYVGDVTGSSPSNATCGWVALGKSPDLSEPQLHVQQLRALPWSRQPPAEPSSWKAPCSGPLVM  
ASDSVDMKMLLNFNVLASSDIKAALDKSAPCRRSVDHRKYLQKQLKRFSQKYSRPLPGRPLPGRGAEPHLKRGSEDRP  
GRLPLDSGHSSSPSGGGCKEKALGNPNYREECLSKEQTLHGPDPEAARPGQVPMRKRQLPASFWEEPRTHTSYPV  
GLEGGGLGREGPPYEGKHKRKGLEPLGPETAPVPASPRAPAEKEPLKMPGVSLVGRVNAWSSCCPFQYHGQPVYPG  
PPGALPQSPLSLGLWRKSSASPGELAHFCKDVEGPGQKVYRPVVLKPIPTKPAVPPPIFNVFGYL  
PMRKRQLPASFWEEP

tr:A0A384AAL9\_BALAS [A0A384AAL9] SubName: Full=LOW QUALITY PROTEIN:  
protein **FAM181A** {ECO:0000313|RefSeq:XP\_007184309.1}; 226..240

MLCIWRGAPDWPEGPPSSGDSSSIQPARGLHNCLQPDHGACRPRRAWPRSAAGTLPGLHGGARGPAPSV  
SSVPCPGAASRLQSPSSWKAPCSGPLVMASDSVDMKMLLNFNVLASSDIKAALDKSAPCRRSVDHRKYLQKQLKR  
FSQKYSRPLPGRPLPGRGAEPHLKRGSEDPGRLPLDSGHSSSPSGGGCKEKALGNPNYREECLSKEQTLHGPDPEA  
ARPGQVPMRKRQLPASFWEEPRTHTSYPVGLEGGGLGREGPPYEGKHKRKGLEPLGPETAPVPASPRAPAEKEPL  
KMPGVSLVGRVNAWSSCCPFQYHGQPVYPGPAGALPQSPLSLGLWRKSSASPSSELAHFCKDVEGPGQKVYRPVVL  
KPIPTKPAVPPPIFNVFGYL PMRKRQLPASFWEEP

tr:A0A2K6TRB4\_SAIBB [A0A2K6TRB4] SubName: Full=Yes associated protein 1  
{ECO:0000313|Ensembl:ENSSBOP00000022186}; 80..94

AGPGELEAFPSSGGEGPPQGGPPSAPGQPAPAATQAAPQAPPAGHQIVHVRGDSETDLEALFNAVMN  
PKTANVPQTVPMRLRKLKLPDSFFKPEPKSHSRQASTDAGTAGALTPQHVRHSSPASLQLGAVSPGTLTPTGVVS

GPAATPTAQHLRQSSFEIPDDVPLPAGWEMAKTSSGQRYFLNHIDQTTTWQDPRKAMLSQMNVTAPTSPVQQNM  
MNSASGPLPDGWEQAMTQDGEIYYINHKNKTTSWLDPRLDPRFAMNQRISSAPVKQPPPLAPQSPQGGVMGGSS  
SNQQQQMRLQQLQMEKERLRLKQOELLRQVRPQAMRNINPSTANSPKCQELALRSQLEQDGGTQNPVSSPGM  
SQELRTMTTNSSDPFLNSGTYHSRDESTDSGLSMSSYSVPRTPDFFLNSVDEMDTGDTINQSTLPSQQNRFPDYL  
EAI PGTNVDLGTLEGDGMNIEGEEELMPSLQEQALSSDILNDMESVLAATKLDKESFLTWL

PMRLRKL PDSFFKPP

tr:A0A2K6TR83\_SAIBB [A0A2K6TR83] SubName: Full=Yes associated protein 1  
{ECO:0000313|Ensembl:ENSSBOP00000022163}; 13..27

MNPKTANVPQTVPMRLRKL PDSFFKPPPEPKSHSRQASTDAGTAGALTPQHVRHSSPASLQLGAVSPGT  
LTPTGVVSGPAATPTAQHLRQSSFEIPDDVPLPAGWEMAKTSSGQRYFLNHIDQTTTWQDPRKAMLSQMNVTAPT  
SPPVQQNMNSASGPLPDGWEQAMTQDGEIYYINHKNKTTSWLDPRLDPRFAMNQRISSAPVKQPPPLAPQSPQ  
GGVMGGSSSNQQQQMRLQQLQMEKERLRLKQOELLRQELALRSQLEQDGGTQNPVSSPGMSQELRTMTTNS  
DPFLNSGTYHSRDESTDSGLSMSSYSVPRTPDFFLNSVDEMDTGDTINQSTLPSQQNRFPDYLEAIPGTNVDLGT  
LEGDGMNIEGEEELMPSLQEQALSSDILNDMESVLAATKLDKESFLTWL PMRLRKL PDSFFKPP

tr:A0A2K6TRA6\_SAIBB [A0A2K6TRA6] SubName: Full=Yes associated protein 1  
{ECO:0000313|Ensembl:ENSSBOP00000022197}; 66..80

PAQPPQGGPPSAPGQPAPAATQAAPQAPPAGHQIVHVRGDSETDLEALFNAVMPKTANVPQTVPMRL  
RKL PDSFFKPPPEPKSHSRQASTDAGTAGALTPQHVRHSSPASLQLGAVSPGTLTPTGVVSGPAATPTAQHLRQ  
SFEIPDDVPLPAGWEMAKTSSGQRYFLNHIDQTTTWQDPRKAMLSQMNVTAPTSPVQQNMNSASAMNQRISS  
APVKQPPPLAPQSPQGGVMGGSSSNQQQQMRLQQLQMEKERLRLKQOELLRQVRPQAMRNINPSTANSPKCQELA  
LRSQLEQDGGTQNPVSSPGMSQELRTMTTNSSDPFLNSGTYHSRDESTDSGLSMSSYSVPRTPDFFLNSVDE  
MDTGDTINQSTLPSQQNRFPDYLEAIPGTNVDLGTLEGDGMNIEGEEELMPSLQEQALSSDILNDMESVLAATKLDK  
ESFLTWL PMRLRKL PDSFFKPP

tr:A0A2K6G6P6\_PROCO [A0A2K6G6P6] SubName: Full=Family with sequence  
similarity 181 member A {ECO:0000313|Ensembl:ENSPCOP00000021907};  
191..205

MPLLEACPREREQHGTDAHRRPAGDEQSAGKQVSLVFPFPGAVGRQQSPSSWKAPSSGGLVMSASDSV  
KMLLNFNVLASSDIKAALDKSAPCRRSVDHRKYLQKQLKRFSSQKYSRLPRGLPGRAAEPHLKRGEEDRPGRLLLD  
PGPESSPGGGGCKEKAPGSPYGEELSKQVQLQGQSPEATRPGQVPMRKRQLPASFWEEP RPTHSYPMGLEGGL  
GPREGPPYEGKKHCKGLEPLGPEVALVPMSPRALAEKEPLEMPGVSLVGRGNAWSCCPLQYHGQPIYPGLPGALP  
QSPVPSLGLWRKSPAFPGE LAHLCKDVGDLGQVCRPVVLKPIPTKPAMAPP I FNVFYGL  
PMRKRQLPASFWEEP

tr:A0A2K6TR76\_SAIBB [A0A2K6TR76] SubName: Full=Yes associated protein 1  
{ECO:0000313|Ensembl:ENSSBOP00000022158}; 13..27

MNPKTANVPQTVPMRLRKL PDSFFKPPPEPKSHSRQASTDAGTAGALTPQHVRHSSPASLQLGAVSPGT  
LTPTGVVSGPAATPTAQHLRQSSFEIPDDVPLPAGWEMAKTSSGQRYFLNHIDQTTTWQDPRKAMLSQMNVTAPT  
SPPVQQNMNSASGPLPDGWEQAMTQDGEIYYINHKNKTTSWLDPRLDPRFAMNQRISSAPVKQPPPLAPQSPQ  
GGVMGGSSSNQQQQMRLQQLQMEKERLRLKQOELLRQAMRNINPSTANSPKCQELALRSQLEQDGGTQNPVS  
SPGMSQELRTMTTNSSDPFLNSGTYHSRDESTDSGLSMSSYSVPRTPDFFLNSVDEMDTGDTINQSTLPSQQNRF  
PDYLEAIPGTNVDLGTLEGDGMNIEGEEELMPSLQEQALSSDILNDMESVLAATKLDKESFLTWL  
PMRLRKL PDSFFKPP

tr:A0A2K6FBU1\_PROCO [A0A2K6FBU1] SubName: Full=Yes associated protein 1  
{ECO:0000313|Ensembl:ENSPCOP00000011450}; 85..99

MDPGQQQPQPAPQGGQQAQTPQGGQPPSGPGQPAPPASQAAPQAPPAGHQIVHVRGDSETDLEALF  
NAVMPKTANVPQTVPMRLRKL PDSFFKPPPEPKSHSRQASTDAGTAGALTPQHVRHSSPASLQLGAVSPGT  
LTPTGVVSGPAATPAAQHLRQSSFEIPDDVPLPAGWEMAKTSSGQRYFLNHIDQTTTWQDPRKAMLSQMNVTAPT  
SPPVQQNLMSASAMNQRISSAPVKQPPPLAPQSPQGGVMGGGSSSNQQQQMRLQQLQMEKERLRLKQOELLRQVRPQ  
AMRNINPSTANSPKCQELALRSQLEQDGGTQNPVSSPGMSQELRTMTTNSSDPFLNSGTYHSRDESTDSGLS  
MSSYSVPRTPDFFLNSVDEMDTGDTINQSTLPSQQNRFPDYLEAIPGTNVDLGTLEGDGMNIEGEEELMPSLQEQAL  
SSDILNDMESVLAATKLDKESFLTWL PMRLRKL PDSFFKPP

tr:A0A2K6SBJ8\_SAIBB [A0A2K6SBJ8] SubName: Full=Family with sequence  
similarity 181 member A {ECO:0000313|Ensembl:ENSSBOP00000004756};  
186..200

LPLGERRSSGRQEGCRPHRTPMACYVPQVSSVSFLGAASHQQSPSSWKALCGGPLVMASDSVVKMLLN  
FVNLAASSDIKAALDKSAPCRRSVDHRKYLQKQLKRFSQKYSRLPRGLPGRAAEPYLKRGPEDRPGRLLLDLGPES  
SPGGGGGCKEKVLRNPNCREECLAKEQLPQGQHPEAAQAGQVPMRKRQLPASFWEEP RPPTHSYHVGLGGLGPREG  
PPYEGKKNCKGLEPLGPETASVPMSPSALAEKESLKMPGVSLVGRVNAWSCC PFQYHGQPIYPGPLGALPQSPVP  
SLGLWRKSPAFFGELAYLCKDADGLGQKVCPRMVLKPIPTKPAVPPPIFNVFGYL PMRKRQLPASFWEEP

tr:F7EAB4\_MACMU [F7EAB4] SubName: Full=Family with sequence similarity  
181 member A {ECO:0000313|Ensembl:ENSMUP00000016280}; 184..198

RSSGERNDAAYRKHRPGEKKAGHSKVS LVPFLGAAGHQSPSSWKASC SGPLVMASDSVVKMLLN FV  
NLAASSDIKAALDKSAPCRRSVDHRKYLQKQLKRFSQKYSRLPRGLPGRAAEPYLKRGS EDRPGRLLLDLGPDS SP  
GGGGGCKEKALRNPNYREECLAKEQLPQGQHPEAAQPGQVPMRKRQLPASFWEEP RPPTHSYHVGLGGLGPREGPP  
YEGKKNCKGLEPLGPEIVPVPMS PRALAEKEPLKMPGVSLVGRVNAWSCC PFQYHGQPIYPGPLGALPQSPVPSL  
GLWKKSPAFFGELAH LCKDADSLGQKVCPRVVLKPIPTKPAVPPPIFNVFGYL PMRKRQLPASFWEEP

tr:H9F9V4\_MACMU [H9F9V4] SubName: Full=Yorkie homolog isoform 3  
{ECO:0000313|EMBL:AFE71413.1}; Flags: Fragment;20..34

EALFNAVMPNPKTANVPQTVPMRLRKL PDSFFKPP EPKSHSRQASTDAGTAGALTPQH VRAHSSPASLQL  
GAVSPGTLTPTGVVSGPAATPTAQHLRQSSFEIPDDVPLPAGWEMAKTSSGQRYFLNHIDQTTTWQDPRKAMLSQ  
MNVTAPTSPPVQONMMNSASGPLPDGWEQAMTQDGEIYYINHKNKTT SWLDRPDRPFAMNQ RISISQAPVKQPPP  
LAPQSPQGGVMGGSSSNQOQQMRLQQLQMEKERLR LKQOELLRQELALRSQLPTLEQDGGTQNPVSSPGMSQELR  
TMTTNSDPFLNSGTYHSRDESTDSGLSMSSYSVPRTPD DFLNSVDEMDTGDTINQSTLPSQQNRFPDYLEAIPG  
TNVDLGTLEGDGMNIEGEE LMPSLQEALSSDILNDMESVLAATKLDKESFLTWL PMRLRKL PDSFFKPP

tr:H9F9V3\_MACMU [H9F9V3] SubName: Full=Yorkie homolog isoform 2  
{ECO:0000313|EMBL:AFE71412.1}; Flags: Fragment;20..34

EALFNAVMPNPKTANVPQTVPMRLRKL PDSFFKPP EPKSHSRQASTDAGTAGALTPQH VRAHSSPASLQL  
GAVSPGTLTPTGVVSGPAATPTAQHLRQSSFEIPDDVPLPAGWEMAKTSSGQRYFLNHIDQTTTWQDPRKAMLSQ  
MNVTAPTSPPVQONMMNSASAMNQ RISISQAPVKQPPPLAPQSPQGGVMGGSSSNQOQQMRLQQLQMEKERLR LKQ  
QELLRQELALRSQLPTLEQDGGTQNPVSSPGMSQELRTMTTNSDPFLNSGTYHSRDESTDSGLSMSSYSVPRTP  
DDFLNSVDEMDTGDTINQSTLPSQQNRFPDYLEAIPG TNVDLGTLEGDGMNIEGEE LMPSLQEALSSDILNDMES  
VLAATKLDKESFLTWL PMRLRKL PDSFFKPP

tr:F7HRP8\_CALJA [F7HRP8] SubName: Full=Family with sequence similarity  
181 member A {ECO:0000313|Ensembl:ENSCJAP00000017662}; 189..203

MPLERRSSRDSDDAATECRPGRKGRST EKQVSSVSFPGAASHQQSPSSWKASC SGPLVMASDSVVKM  
LLNFVNLAASSDIKAALDKSAPCRRSVDHRKYLQKQLKRFSQKYSRLPRGLPGRAAEPYLKRGPEDRPGRLLLDLG  
PDSSSPGGGGCKEKVLRNPNCREECLAKEQLPQGQHPEAAQPGQVPMRKRQLPASFWEEP RPPTHSYHVGLGGLGP  
REGPPYEGKKNCKGLEPLGPETASVPMSPSALVEKESLKMPGVSLVGRVNAWSCC PLQYHGQPIYPGPLGALPQ  
PVPSLGLWRKSPAFFGELAH LCKDADGLGQKVCPRMVLKPIPTKPAVPPPIFNVFGYL PMRKRQLPASFWEEP

tr:G7MW15\_MACMU [G7MW15] SubName: Full=Uncharacterized protein  
{ECO:0000313|EMBL:EHH28130.1}; Flags: Fragment;190..204

PLEEKRSSGERNDAAYRKHRPGEKKAGHSKAVSLVPFLGAAGHQSPSSWKASC SGPLVMASDSVVK  
MLLN FVNLAASSDIKAALDKSAPCRRSVDHRKYLQKQLKRFSQKYSRLPRGLPGRAAEPYLKRGS EDRPGRLLLDL  
GPDSSPGGGGGCKEKALRNPNYREECLAKEQLPQGQHPEAAQPGQVPMRKRQLPASFWEEP RPPTHSYHVGLGGLG  
PREGPPYEGKKNCKGLEPLGPEIVPVPMS PRALAEKEPLKMPGVSLVGRVNAWSCC PFQYHGQPIYPGPLGALPQ  
SPVPSLGLWKKSPAFFGELAH LCKDADGLGQKVCPRVVLKPIPTKPAVPPPIFNVFGYL  
PMRKRQLPASFWEEP

tr:A0A2K5IFP6\_COLAP [A0A2K5IFP6] SubName: Full=Yes associated protein 1  
{ECO:0000313|Ensembl:ENSCANP00000015376}; 60..74

XXXXXXXXXXXXPAATQAAPQAPPAGHQIVHVRGDSE TDLEALFNAVMPNPKTANVPQTVPMRLRKL PDS  
FFKPP EPKSHSRQASTDAGTAGAVTPQH VGVHSSPASLQLGAVSPGTLTPTGVVSGPAATPTAQSLQSSFEIPD  
DVPLPADWEMAKTSSGQRYFLNHIDQTTTWQDPRKAMLSQ MNVTAPTSPPVQONMMNSASGPLPDGWEQAMTQD  
GEIYYINHKNKTT SWLDRPDRPFAMNQ RISISQSDPVKQPPPLAPQSPQGGVMGGSSSNQOQQMRLQQLQMEKERLR  
LKQOELLRQAMRNINPSTANSPKCQELALRSQLPTLEQDAGTPNPVSSPGMSQELRTMTTNSDPFLNSGTYHSR  
DESTDSGLSMSSYSVPRTPD DFLNSVDEMDTGDTINQSTLPSQQNRFPDYLEAIPG TNVDLGTLEGDGMNIEGEE  
LMPSLQEALSSDILNDMESVLAATKLDKESFLTWL PMRLRKL PDSFFKPP

tr:A0A2K5IG17\_COLAP [A0A2K5IG17] SubName: Full=Yes associated protein 1 {ECO:0000313|Ensembl:ENSCANP00000015402}; 48..62

PAATQAAPQAPPAGHQIVHVRGDETDLEALFNAVMPKNTANVPQTVPMRLRKLKLPDSFFKPPPEPKSHSR  
QASTDAGTAGAVTPQHVGVSHPASLQGLAVSPGTLTPTGVVSGPAATPTAQLQSSFEIPDDVPLPADWEMAK  
TSSGQRYFLNHIDQTTTWQDPRKAMLSQMNVTAPTSPVQONMMNSASAMNQRISQSDPVKQPPPLAPQSPQGGV  
MGGNSNSNQQQQMRLQQLQMEKERLRLKQQELLRQVRPQAMRNINPSTANSKQELALRSQLPQDAGTNPV  
SSPGMSQELRTMTTNSDPFLNSGTYHSRDESTDSGLSMSSYSVPRTPDDFLNSVDEMDTGDITINQSTLPSQQNR  
FPDYLEAIPGTNVDLGTLEGDGMNIEGEELMPSLQEQALSSDILNDMESVLAATKLDKESFLTWL  
PMRLRKLKLPDSFFKPP

tr:A0A2K5IFJ4\_COLAP [A0A2K5IFJ4] SubName: Full=Yes associated protein 1 {ECO:0000313|Ensembl:ENSCANP00000015390}; 60..74

XXXXXXXXXXXXPAATQAAPQAPPAGHQIVHVRGDETDLEALFNAVMPKNTANVPQTVPMRLRKLKLPDS  
FFKPPPEPKSHSRQASTDAGTAGAVTPQHVGVSHPASLQGLAVSPGTLTPTGVVSGPAATPTAQLQSSFEIPD  
DVPLPADWEMAKTSSGQRYFLNHIDQTTTWQDPRKAMLSQMNVTAPTSPVQONMMNSASGPLPDGWEQAMTQDG  
EIYYINHKNKTTSWLDPRLDPRFAMNQRISQSDPVKQPPPLAPQSPQGGVMGGNSNSNQQQQMRLQQLQMEKERLR  
LKQQELLRQVRPQELALRSQLPQDAGTNPVSSPGMSQELRTMTTNSDPFLNSGTYHSRDESTDSGLSMSS  
YSVPRTPDDFLNSVDEMDTGDITINQSTLPSQQNRFPDYLEAIPGTNVDLGTLEGDGMNIEGEELMPSLQEQALSSD  
ILNDMESVLAATKLDKESFLTWL PMRLRKLKLPDSFFKPP

tr:A0A2K5I8C1\_COLAP [A0A2K5I8C1] SubName: Full=Family with sequence similarity 181 member A {ECO:0000313|Ensembl:ENSCANP00000012883}; 190..204

TPLEEKRSSGERNNAAYRKHRRPGEKKAGTAKQVSLPFLGAAGHQSSPSSWKASCGLVMASDSQV  
MLLNFNVLASSDIKAALDKSAPCRRSVDHRKYLQKQLKRFSQKYSRLPRGLPGRATEPYLKRGESEDRPGRLLLDL  
GPDSSPGGGGGCKEKALRNYPREECLAKEQLPQGQHPAAQPGQVPMRKRQLPASFWEEP RPPTHSYHVGLGGLG  
PREGPPYEGKKNCKGLEPLGPEIVPVPMSPRALAEKEPLKMPGVSLVGRVNAWSCCPFYHGQPIYPGPLGALPQ  
SPVPSLGLWKKSPAFPGEVLVHLCKDADGLGQKVCRPVVLKPIPTKPAVPPPIFNVFGYL  
PMRKRQLPASFWEEP

tr:A0A2K5PHS9\_CEBCA [A0A2K5PHS9] SubName: Full=Family with sequence similarity 181 member A {ECO:0000313|Ensembl:ENSCCAP00000003177}; 190..204

MPLERRSSDRKDAAHIECRPGWKQSTEQVSSVSFPGAASQQSSPSSWKASCGLVMASDSQV  
MLLNFNVLASSDIKAALDKSAPCRRSVDHRKYLQKQLKRFSQKYSRLPRGLPGRATEPYLKRGPDPNQPGRLLLDL  
GPDSSPGGGGGCKEKVLRNCPREECLAKEQLPQGQHPAARPGQVPMRKRQLPASFWEEP RPPTHSYHVGLGGLG  
PREGPPYEAKKNCKGLEPLGPETASVSMSPSALAEKESLKMMPGVSLVGRVNAWSCCPFYHGQPIYPGPLGALPQ  
SPVPSLGLWRKSPTFPGELAYLCKDADGLGQKVCRPVVLKPIPTKPAVPPPIFNVFGYL  
PMRKRQLPASFWEEP

tr:L8YB02\_TUPCH [L8YB02] SubName: Full=Protein **FAM181A** {ECO:0000313|EMBL:ELV12145.1}; 160..174

MAAGRDANGPFVQPALSVPFPGAAGHQHSPSSWKVPCGGPLVMASDSQV KMLLNFNVLASSDIKAALD  
KSAPCRRSVDHRKYLQKQLKRFSQKYSRLPRGLPSRVAEPLKRGPDQRHPGGGGGGCKEKALGSPYGEELCSKEQ  
TLRGQNPEAARPGQVPMRKRQLPASFWEEP RPPTHSYPMGLEGLGPREGPPYEGKKNCKGLEPLGPETAPMPVSP  
RALAEKEPLKMPGVSLVGRVNAWSCCPFYHGQPLYPGPPGALPQSPVPSLGLWRKNPTSPGEPGEPAPFCKDQV  
SLGQKVHRPVVLKPSPTKPAVPPPIFNVFGYL PMRKRQLPASFWEEP

tr:G3MYF5\_BOVIN [G3MYF5] SubName: Full=Family with sequence similarity 181 member A {ECO:0000313|Ensembl:ENSBTAP00000054587}; 161..175

RQVGSVLFPGAASCLENPASSWKARCSGALVMASDSQV KMLLNFNVLASSDIKAALDKSAPCRRSVDHR  
KYLQKQLKRFSQKYSRLPRGLPGRGAEPLKRGPEDRPGRPLPLESGHGSSPGGGGGCKEKALGNLDREESLSKE  
RTLHGPDPGAARPGQVPMRKRQLPASFWEEP RPPTHSYPMGLEGLGPREGPPYEGKKNCKGLEPLGPETTPVPTS  
PRAPAEKEPLKMPGVSLVGRVSAWSCCPFYHGQPVYPSPPGALPQSPMPSLGLWRKSAASPGELAHFCKDAEGP  
GQKVYRPVVLKPIPTKPAVPPPIFNVFGYL PMRKRQLPASFWEEP

tr:W5PX95\_SHEEP [W5PX95] SubName: Full=Family with sequence similarity 181 member A {ECO:0000313|Ensembl:ENSOARP00000015079}; 217..231

MPWEGGGEREKERERERQTGRVSHSTLKDSGESSPWLTPSDCLSALEHGSCRPGVLGVSFLVPGAAS

CLENPASSWKARGSGALVMASDSDVKMLLNFNVLASSDIKAALDKSAPCRRSVDHRKYLQKQLKRFSQKYSRLPR  
GLPGRGAEPHLKRGPEDRPGRPLHLESGHGSSPSGGGGYKEKALGNPDREESLSKERTLHGPDGAARPGQVPMR  
KRQLPASFWEEP RP THSY PVGLEGG LGPREGPPYEGKKHCKGLEPLGPETAPVPTSPRAPAEKEPLKMPGVSLVG  
RVSAWSCCPFYHQPIYPSPPGALPQSPMPSLGLWRKSAASPGELAHFCKDAEGPGQKVYRPVVLKPIPTKPAV  
PPPIFNVFGYL PMRKRQLPASFWEEP

tr:H0X0L5\_OTOGA [H0X0L5] SubName: Full=Family with sequence similarity  
181 member A {ECO:0000313|Ensembl:ENSOGAP00000008466}; 170..184

PGEIPMACCISQVSSVPFRGVADHQQNPPSSWKAPCSGPLVMASDSDVKMLLNFNVLASSDIKAALDKS  
APCRRSVDHRKYLQKQLKRFSQKYSRLPRGLPGRAAEPHLKRGPEDRPGRLLLLDPGPESSPGGGGGYKEKALGNP  
YSEECLSKAQVLQGSPEAARPGQVPMRKRQLPASFWEEP RP THSY SMGLEGG LGPREGPPYEGKKCKGLES LG  
PEAAPVPMSPRALAEKEPLKMPGVSLVGRSSAWSCCPQYHQPIY PGLSGTLPQSP I PSLGLWRKSPA FPGELA  
HFCKEVDGLGQVYRPVVLKPIPTK PAMAPPIFNVFGYL PMRKRQLPASFWEEP

tr:H2NET4\_PONAB [H2NET4] SubName: Full=Uncharacterized protein  
{ECO:0000313|Ensembl:ENSPPYP00000004258}; 181..195

MAVQAALLSTHPFV PFGFGGSPDGLGGAFGALDKGCCFEDDET GAPAGALLSGAEGGDVREATRDL LSF  
IDSASSNIKLALDKPGKSKRKNVHRKYLQKQIKRCSGLMGAAPPGPSAASQSRSLIVLFD SMRHVP GGAE P  
AVAAPAAGLGGAGTGGAGGDVAGPAGATAIPGARKVPLRARNLPPSFFTEPSRAGGGGCVPSGPDVSLGDLEKGA  
EAVEFFELLGPDY GAGTEAAVLLAAEPLDVFPAGASVLRGPPELEPGLFEPPPAVVGNNLLY PEPWSVPGCPPTKK  
SPLTAPRGGLTLNEPLRPLYPAAADSPGGEDGPGHLASFAPFFPDCALPPPPPHQVSYDYSAGYSRTAYSSLWR  
SDGVWEGAPGEEGAHRD PLRARNLPPSFFTEP

tr:H2NFY0\_PONAB [H2NFY0] SubName: Full=Uncharacterized protein  
{ECO:0000313|Ensembl:ENSPPYP00000004665}; 172..186

LLSGAEGGEVREATRDL LSFIDSASSNIKLALDKPGKSKRKNVHRKYLQKQIKRCSGLMGAAPPGPS  
SAADTPAKRPLAAPSAPTVAAPAHGKAAPRREASQAAAAASLQSRSLAALFDSL RHVPGGAE P  
GGAGTGGAGGDVAGPAGATAIPGARKVPLRARNLPPSFFTEPSRAGGGGCVPSGPDVSLGDLEKGA EAVEFFELL  
GPDY GAGTEAAVLLAAEPLDVFPAGASVLRGPPELEPGLFEPPPAVVGNNLLY PEPWSVPGCPPTKK  
SPLTAPRGGLTLNEPLRPLYPAAADSPGGEDGPGHLASFAPFFPDCALPPPPPHQVSYDYSAGYSRTAYSSLWR  
LTL PLRARNLPPSFFTEP

tr:A0A2J8TLZ9\_PONAB [A0A2J8TLZ9] SubName: Full=FAM181A isoform 5  
{ECO:0000313|EMBL:PNJ33983.1}; Flags: Fragment; 129..143

MASDSDVKMLLNFNVLASSDIKAALDKSAPCRRSVDHRKYLQKQLKRFSQKYSRLPRGLPGRAAEPYLK  
RGSEDRPGRLLLLDLGPDSSPGGGGGCKEKALRNYPYREECLAKEQLPQGHPEAAQPGQVPMRKRQLPASFWEEP  
R P THSYHVGLEGG LGPREGPPYEGKKCKGLES LGP PETTPVPMSPRALAEKEPLKMPGVSLVGRVNAWSCCPFYH  
GQPIYPGGLGTL P PMRKRQLPASFWEEP

tr:A0A2J8QMV0\_PANTR [A0A2J8QMV0] SubName: Full=FAM181A isoform 5  
{ECO:0000313|EMBL:PNI97569.1}; Flags: Fragment; 129..143

MASDSDVKMLLNFNVLASSDIKAALDKSAPCRRSVDHRKYLQKQLKRFSQKYSRLPRGLPGRAAEPYLK  
RGSEDRPGRLLLLDLGPDSSPGGGGGCKEKVLRNYPYREECLAKEQLPQRQHPEAAQPGQVPMRKRQLPASFWEEP  
R P THSYHVGLEGG LGPREGPPYEGKKCKGLES LGP PETTLVPMSPRALDEKEPLKMPGVSLVGRVNAWSCCPFYH  
GQPIYPGGLGAL P PMRKRQLPASFWEEP

tr:A0A2K5KWF0\_CERAT [A0A2K5KWF0] SubName: Full=Family with sequence  
similarity 181 member A {ECO:0000313|Ensembl:ENSCATP00000005007};  
191..205

MPLLEKRSSGERNDAAYRKHRPGEKKAGTAKQVSLVPFLGAAGHQSPSSWKASCSPGLVMASDSDV  
KMLLNFNVLASSDIKAALDKSAPCRRSVDHRKYLQKQLKRFSQKYSRLPRGLPGRAAEPYLKRGSEDRPGRLLLL  
LGPDSSPGGGGGCKEKALRNYPYREECLAKEQLLQGHPEAAQPGQVPMRKRQLPASFWEEP RP THSYHVGLEGG  
LPREGPPYEGKKCKGLES LGP EIVPVPMSPRALAEKEPLKMPGVSLVGRVNAWSCCPFYHQPIY PGLGALP  
QSPVPSLGLWKKSPA FPGELAH LCKDADGLGQKVC RPVVLKPIPTK PAAPPIFNVFGYL  
PMRKRQLPASFWEEP

tr:A0A337SBL9\_FELCA [A0A337SBL9] SubName: Full=Family with sequence  
similarity 181 member B {ECO:0000313|Ensembl:ENSFCAP000000047839};  
221..235

MAVQAALLSTHPFV PFGFGGSPDGLGGAFGALDKGCCFEDDETGT PAGEDLAGNEGGDMREATRDL LSF



IDSASSNIKLALDKPGKSKRKVNHRKYLQKQIKRCSGLMGAAPPGPPSPGAADTPAKRPLAAPSAQAVAVPPHGK  
AVPRREASQAAAAASLQSRSLAALFDSLRLHVPDTEGAGGSLAAPAAGLGGAGAGGSGGEAAGTAGGTAVPGARK  
VPLRARNLPPSFFTEPSRAGGGGCGSPGVS LGDLEKGAEELEFFELLGPDYAGGTEASVLLAAEPLDVFTGA  
AVLRGPPELEPLGFEPAMVGSLLYSESWAPGCPQTKKPLAAPRGGLTLNEPLRPLYPSAADSPGAEDGPGL  
LASFAPFFSDCALPAPPPPHQVSYDYSAGYSRTAYSSLWRPDGVWEGAPGEEGAHRD PLRARNLPPSFFTEP

tr:A0A337SGJ8\_FELCA [A0A337SGJ8] SubName: Full=Yes associated protein 1  
{ECO:0000313|Ensembl:ENSFCAP00000049727}; 82..96

WTPGRRPHSPRPPAPRAPPPAQPPPGQPPPAPGPAAPPQPAGHQIVHVRGDSETDLEALFNAV  
MNPKTANVPQTVPMRLRKL PDSFFKPEPKSHSRQASTDAGSAGALAPQHVRHSSPASLQLGAVSPGTLTPTGV  
VSGPAATPAAQHLRQSSFEIPDDVPLPAGWEMAKTSSGQRYFLNHIDQTTTWQDPRKAMLSQMSVTAPTSPVQO  
NMMNSASGPLPDGWEQAMTQDGEIYYINHKNKTTSWLDPRLDPRFAVNQRVQGSAPAKQPPPLAPQSPGGVLGS  
GGSNQMRLLQQLQMEKERLRLKQEQELLRQVRPQAMRNINPSSANSKPCQELALRSQLPTLDQEGGTQNPVPSGM  
SQELRTMTTSSDPFLNSGTYHSRDESTDSGLSMSSYSVPRTDFFLNSVDEMDTGDTINQSTLPSQQNPPIPGTN  
VDLGTLEGDGMNIEGEEELMPSLQEQALSSDILNDMESVLAATKLDKESFLTWL PMRLRKL PDSFFKPP

tr:A0A337S1H6\_FELCA [A0A337S1H6] SubName: Full=Family with sequence  
similarity 181 member A {ECO:0000313|Ensembl:ENSFCAP00000040424};  
190..204

LGYGGIRT LAEPCDLAPKQGAHPGDLRAALCRVSSVPSPGAASHEQNPPASWKAPCSGLLVMANDSDVK  
MLLNFNVLASSDIKAALDKSAPCRRSVDHRKYLQKQLKRFSSQKYSRLPRGLPGRGAEPHLKRGPEDRPGRPLDS  
GRDSSPGGGGGCKEKALGNPYREECLSKEQTLQGNPEAARPGQVPMRKRQLPASFWEEP RATHSYPLGLEGGPG  
PREGPPYEGKKHCKGLEPLDPETAPVPASPRAPAEKEPLKMSGVSLVGRVNAWSCCPFYHGQPVYPPGPPGALPQ  
SPVPGLSLWRKSPASPGELAHFCKDVGDPGQKVYRPVVLKPIPTKPAVPPPIFNVFGYL  
PMRKRQLPASFWEEP

tr:A0A2I2UR01\_FELCA [A0A2I2UR01] SubName: Full=Yes associated protein 1  
{ECO:0000313|Ensembl:ENSFCAP00000034850}; 82..96

WTPGRRPHSPRPPAPRAPPPAQPPPGQPPPAPGPAAPPQPAGHQIVHVRGDSETDLEALFNAV  
MNPKTANVPQTVPMRLRKL PDSFFKPEPKSHSRQASTDAGSAGALAPQHVRHSSPASLQLGAVSPGTLTPTGV  
VSGPAATPAAQHLRQSSFEIPDDVPLPAGWEMAKTSSGQRYFLNHIDQTTTWQDPRKAMLSQMSVTAPTSPVQO  
NMMNSASGPLPDGWEQAMTQDGEIYYINHKNKTTSWLDPRLDPRFAVNQRVQGSAPAKQPPPLAPQSPGGVLGS  
GGSNQMRLLQQLQMEKERLRLKQEQELLRQVRPQELALRSQLPTLDQEGGTQNPVPSPGMSQELRTMTTSSDPFL  
NSGTYHSRDESTDSGLSMSSYSVPRTDFFLNSVDEMDTGDTINQSTLPSQQNPPIPGTNVDLGTLEGDGMNIEG  
ELMPSLQEQALSSDILNDMESVLAATKLDKESFLTWL PMRLRKL PDSFFKPP

tr:A0A337S140\_FELCA [A0A337S140] SubName: Full=Yes associated protein 1  
{ECO:0000313|Ensembl:ENSFCAP00000042260}; 82..96

WTPGRRPHSPRPPAPRAPPPAQPPPGQPPPAPGPAAPPQPAGHQIVHVRGDSETDLEALFNAV  
MNPKTANVPQTVPMRLRKL PDSFFKPEPKSHSRQASTDAGSAGALAPQHVRHSSPASLQLGAVSPGTLTPTGV  
VSGPAATPAAQHLRQSSFEIPDDVPLPAGWEMAKTSSGQRYFLNHIDQTTTWQDPRKAMLSQMSVTAPTSPVQO  
NMMNSASAVNQRVQGSAPAKQPPPLAPQSPGGVLGSGGSNQMRLLQQLQMEKERLRLKQEQELLRQVRPQAMRNI  
NPSSANSKPCQELALRSQLPTLDQEGGTQNPVPSPGMSQELRTMTTSSDPFLNSGTYHSRDESTDSGLSMSSYS  
VPRTDFFLNSVDEMDTGDTINQSTLPSQQNPPIPGTNVDLGTLEGDGMNIEGEEELMPSLQEQALSSDILNDMESV  
LAATKLDKESFLTWL PMRLRKL PDSFFKPP

tr:A0A2K6P1K7\_RHIRO [A0A2K6P1K7] SubName: Full=Family with sequence  
similarity 181 member A  
{ECO:0000313|Ensembl:ENSRROP00000010416};>tr:A0A2K6JWU0\_RHIBE [A0A2K6JWU0]  
SubName: Full=Family with sequence similarity 181 member A  
{ECO:0000313|Ensembl:ENSRBIP00000003484}; 191..205

TPLEEKRSSGERNDVAYRKHRRPGEKKAGTAKQVSLVPFLGAAGHQOSPSSWKASCSPGLVMASDSV  
KMLLNFNVLASSDIKAALDKSAPCRRSVDHRKYLQKQLKRFSSQKYSRLPRGLPGRAEPPYLKRGSEDRPGRLLLD  
LGPDSSPGGGGGCKEKALRNYPYREECLAKEQLPQGHPEAAQPGQVPMRKRQLPASFWEEP RATHSYHVGLEGLL  
GPREGPPYEGKKHCKGLEPLGPEIVPVPMSPRALAEKEPLKMPGVSLVGRVNAWSCCPFYHGQPIYPPGPLGALP  
QSPVPSLGLWKKSPAFPGELAHLCADGLGQKVCRPVVLKPIPTKPAVPPPIFNVFGYL  
PMRKRQLPASFWEEP

tr:A0A2K6Q6P6\_RHIRO [A0A2K6Q6P6] SubName: Full=Uncharacterized protein {ECO:0000313|Ensembl:ENSRROP00000024452}; 221..235

MAVQAALLSTHPFVFPFGFGGSPDGLGGAFGALDKGCCFEDDETGAPAGALLSGAEGGDVREATRDLLSF  
IDSASSNIKLALDKPGKSKRKVNHRKYLQKQIKRCSGLMGAVPPGPPSPSAADTPAKRPLAAPCAPTVAAPAHCK  
AVPRREAQAASLQSRSLAALFDSLRLHVPGGAEPAGGAVVAVVAGLGGAGTGGAGGDAVGPAGATAVPGARK  
VPLRARNLPPSFFTEPSRAGGGGCGSPGPDVSLGDLEKGAEAVEFFELLGPDYAGTEAAVLLAAEPLDVFPAGA  
SVLRGPPELESGLFDPAPAVVGNLLYPEPWSVPGCPPTKKPPLTAPRGGLTLNEPLRPLYPAAADSPPGGEDGPGH  
LASFSPPFFDCALPPPPPHQVSYDYSAGYSRNAYSSLWRPDGVWEGAPGEEGAHRD PLRARNLPPSFFTEP

tr:F6R5L7\_MONDO [F6R5L7] SubName: Full=Family with sequence similarity 181 member B {ECO:0000313|Ensembl:ENSMODP00000005604}; 222..236

MAVQAAILSPHHFIPFCFPGSPGALGMDFGDLDKCCYEDEAGGTGAALLGGGGGGDFREATRDLLSF  
IDSASSNIKLALDKPVKSKRKVNHRKYLQKQIKRCTGMMTSSPASASGPAPSASPSGPAAVSVGALEAPTCKSK  
APPKREGSQAASLQSKSLAALFDSLHQVRGGGGEKGGAGTLAAVTGGGGGGSGGAGVEGGVPAVAPPGAGGNK  
KVPLRNRNLPPSFFTEPSRAGSCGSPGGVTLRELEKGGAEVEFFELLGPDYCAGGEVGGLLPSEPLDLFPAAVR  
PPQELEHILYDPHTLVAGLLYSEPWSTPCPPAKKPAPVSNRGGGGLTLNETLRPLYSSSTSDS  
PLRNRNLPPSFFTEP

tr:A0A096NJH4\_PAPAN [A0A096NJH4] SubName: Full=Family with sequence similarity 181 member A {ECO:0000313|Ensembl:ENSPANP00000013125}; 191..205

TPLEEKRSSGERNDAAYRKHRPGEKKAGTAKQVSLVPFLGAAGHQOSPSSWKASCGLVMASDSDV  
KMLLNFNVLASSDIKAALDKSAPCRRSVDHRKYLQKQLKRFSQKYSRLPRGLPGRAPPEYLKRGSEDRPGRLLLDL  
LGPDSSPGGGGCKEKALRNYPYREECLAKEQLPQGQHPEAAQPGQVPMRKRQLPASFWEEPRTHSYHVGLEGGL  
GPREGPPYEGKKNCKGLEPLGPEIVPVPMSPRALAEKEPLKMPGVSLVGRVNAWSCCPFYHGQPIYPGPLGALP  
QSPVPSLGLWKKSPAFPGEHLCKDADGLGQKVCPRVVLKPIPTKPAVPPPIFNVFGYL  
PMRKRQLPASFWEEP

tr:A0A2K5CEF3\_AOTNA [A0A2K5CEF3] SubName: Full=Family with sequence similarity 181 member A {ECO:0000313|Ensembl:ENSANAP00000007036}; 190..204

MPLKERRSSRDGKDAAHTECRPGWKQSTEQVSSVSFPGAASHQOSPSSWKASCGLVMASDSDV  
MLLNFNVLASSDIKAALDKSAPCRRSVDHRKYLQKQLKRFSQKYSRLPRGLPGRAAESYLKRGFENRPGRLLLDL  
GPDSSPGGGGCKEKVLRNPCREECLAKEQLPQGQHPEAARPGQVPMRKRQLPASFWEEPRTHSYHVGLEGGL  
PREGPPYEGKKNCKGLEPLGPETASGPMSPSALAEKESLKMPEVSLVGRVNAWSCCPFYHGQPIYPGPLGALPQ  
SPVPSLGLWRKSPAFPGEHLCKDADGLGQKVCPRMVLKPIPTKPAVPPPIFNVFGYL  
PMRKRQLPASFWEEP

tr:A0A2K5CEB8\_AOTNA [A0A2K5CEB8] SubName: Full=Family with sequence similarity 181 member A {ECO:0000313|Ensembl:ENSANAP00000007038}; 225..239

MLCIWRGAPDWPEGPPSSGELSSIQPTQGLHNCFQPDGAQPAVPGVPVGLQRTCRATLVGPRPAPSVS  
SVSFPGAASHQOSPSSWKASCGLVMASDSDVKMLLNFNVLASSDIKAALDKSAPCRRSVDHRKYLQKQLKRF  
SQKYSRLPRGLPGRAAESYLKRGFENRPGRLLLDLGPDSSPGGGGCKEKVLRNPCREECLAKEQLPQGQHPEAA  
RPGQVPMRKRQLPASFWEEPRTHSYHVGLEGGLGPREGPPYEGKKNCKGLEPLGPETASGPMSPSALAEKESL  
MPEVSLVGRVNAWSCCPFYHGQPIYPGPLGALPQSPVPSLGLWRKSPAFPGEHLCKDADGLGQKVCPRMVLK  
PIPTKPAVPPPIFNVFGYL PMRKRQLPASFWEEP

tr:A0A2K5CZ67\_AOTNA [A0A2K5CZ67] SubName: Full=Family with sequence similarity 181 member B {ECO:0000313|Ensembl:ENSANAP00000013999}; 218..232

MAVQAALLSTHPFVFPFGFGGSPDGLGGAFGALDKGCCFEDDETGAPAGALLSGAEGGDVREATRDLLSF  
IDSASSNIKLALDKPGKSKRKVNHRKYLQKQIKRCSGLMGAAPPGPPSPSAAGHARQTAAGRPRGRPDSRGPSPRQ  
GCPPAGGVAGRGRQLASRSLAALFDSLRLHVSOGAEPAGGAVLAPAAGLGGAGGDTAGPAGGAAVPGARKVPL  
RARNLPPSFFTEPSRGGGSGCGRVAGRELGRPGEGRGRVLRAGARLRRRHRGGRLAGRREPLDVFPAGASV  
LRGPPELEPGLFEPSSVGNLLYPEPWSVPGCPPTKKPPLTAPARLDLERALAPLYPAAADSPPGGEDGPGHLAS  
FAPFFPDCALPPPPPHSGPHRLLPWRPDGVWEGAPGEEGAHR PLRARNLPPSFFTEP

tr:G3W8G2\_SARHA [G3W8G2] SubName: Full=Yes associated protein 1  
{ECO:0000313|Ensembl:ENSSHAP00000011717}; 82..96

MDPGQQPPQPPSQGQGGQPPSQPPQGGQGGPPTGPGPAGTSAAPPPPAGHQIVHVRGDSETDLEALFNAV  
MNPKTANVPQTVPMRLRKLKLPDSFFKPPPEPKSHSRQASTDAGTAGALTPQHVRHSSPASLQLGAVSPGTLSPSGV  
VSAPGAAPSGQHLRQSSFEIPDDVPLPAGWEMAKTSSGQRYFLNHIDQTTTWQDPRKAMLSQMNVTAPTSPVQ  
NIMNSASGPLPDGWEQAMTQDGEIYYINHKNKTTSWLDPRLDPRFAMNQRISSQAPVKQPPPLAPQSPQGSVMGG  
GSSNQQQMRLQQLQVEKERLRLKHQELLRQALRNVPSTANSPKRQEIALLRSQLPTMEQDGGTQNPVSSPGMNQ  
ELRTMTTNSSDPFLNSGTYHSRDESTDSGLSMSSYSVPRTPDFFLNSVDEMDTGDSISQSNIPSQNRFPDYLEA  
IPGTNVDLGTLEGDGMNIEGEEMLPSLQEQALSSDILNDMESVLAATKLDKESFLTWL PMRLRKLKLPDSFFKPP

tr:G3W7G9\_SARHA [G3W7G9] SubName: Full=Uncharacterized protein  
{ECO:0000313|Ensembl:ENSSHAP00000011374}; 217..231

REEMAAGVIRNLCDFRLQAAFHQPFLLPTSGHRDPDFPETSEEEEEEDGEEEEEGEKLGDNLLELAGSNPGC  
QRSDQNLITGPTRSSPSSAEMTLQLLRFSELISCDIQKYFGQKTKDDDDPDACNIYEDCRPPGKSARELYYADLMQ  
IVQSGDQEDDQEDTDVVGGLPKGLDCPARFISSRDRSQKLGPLVELFEYGLCQYARQVSDSRRLRLEKKYGHITPMH  
KRKLPQSFWKEPAPSSLCLLNTSTPDFSLLANWTSVAQELHGVGGRELDLDRQALE PMHKKRKLKQSFWKEP

tr:A0A2R9CPZ2\_PANPA [A0A2R9CPZ2] SubName: Full=Yes associated protein 1  
{ECO:0000313|Ensembl:ENSPPAP00000040677}; 89..103

MGFYHISQAGRKLLTSGDPPPLASQSGGTTGGPPSPGPGQPAPAATQAAPQAPPAGHQIVHVRGDSETDL  
EALFNAVMPKTANVPQTVPMRLRKLKLPDSFFKPPPEPKSHSRQASTDAGTAGALTPQHVRHSSPASLQLGAVSPG  
TLTPTGVVSGPAATPTAQHLRQSSFEIPDDVPLPAGWEMAKTSSGQRYFLNHIDQTTTWQDPRKAMLSQMNVTAP  
TSPVQQNMMNSASGPLPDGWEQAMTQDGEIYYINHKNKTTSWLDPRLDPRFAMNQRISSQAPVKQPPPLAPQSP  
QGGVMGGSNSNQQQMRLQQLQMEKERLRLKQEQELLRQVRPQAMRNINPSTANSPKCQELALRSQLPTLEQDGGT  
QNPVSSPGMSQELRTMTTNSSDPFLNSGTYHSRDESTDSGLSMSSYSVPRTPDFFLNSVDEMDTGDTINQSTLPS  
QQNRFPDYLEAIPGTNVDLGTLEGDGMNIEGEEMLPSLQEQALSSDILNDMESVLAATKLDKESFLTWL  
PMRLRKLKLPDSFFKPP

tr:A0A2R9CFK0\_PANPA [A0A2R9CFK0] SubName: Full=Yes associated protein 1  
{ECO:0000313|Ensembl:ENSPPAP00000040720}; 70..84

XXXXXXXXXXXXXQGGPPSGPGQPAPAATQAAPQAPPAGHQIVHVRGDSETDLEALFNAVMPKTANVPQTV  
PMRLRKLKLPDSFFKPPPEPKSHSRQASTDAGTAGALTPQHVRHSSPASLQLGAVSPGTLTPTGVVSGPAATPTAQH  
LRQSSFEIPDDVPLPAGWEMAKTSSGQRYFLNHIDQTTTWQDPRKAMLSQMNVTAPTSPVQQNMMNSASAMNQ  
ISQAPVKQPPPLAPQSPQGGVMGGSNSNQQQMRLQQLQMEKERLRLKQEQELLRQVRPQAMRNINPSTANSPKC  
QELALRSQLPTLEQDGGTQNPVSSPGMSQELRTMTTNSSDPFLNSGTYHSRDESTDSGLSMSSYSVPRTPDFFLN  
SVDEMDTGDTINQSTLPSQQNRFPDYLEAIPGTNVDLGTLEGDGMNIEGEEMLPSLQEQALSSDILNDMESVLAAT  
KLDKESFLTWL PMRLRKLKLPDSFFKPP

tr:A0A2R9CFQ0\_PANPA [A0A2R9CFQ0] SubName: Full=Yes associated protein 1  
{ECO:0000313|Ensembl:ENSPPAP00000040719}; 70..84

XXXXXXXXXXXXXQGGPPSGPGQPAPAATQAAPQAPPAGHQIVHVRGDSETDLEALFNAVMPKTANVPQTV  
PMRLRKLKLPDSFFKPPPEPKSHSRQASTDAGTAGALTPQHVRHSSPASLQLGAVSPGTLTPTGVVSGPAATPTAQH  
LRQSSFEIPDDVPLPAGWEMAKTSSGQRYFLNHIDQTTTWQDPRKAMLSQMNVTAPTSPVQQNMMNSASGPLPD  
GWEQAMTQDGEIYYINHKNKTTSWLDPRLDPRFAMNQRISSQAPVKQPPPLAPQSPQGGVMGGSNSNQQQMRLQ  
QLQMEKERLRLKQEQELLRQVRPQELALRSQLPTLEQDGGTQNPVSSPGMSQELRTMTTNSSDPFLNSGTYHSRDE  
STDSGLSMSSYSVPRTPDFFLNSVDEMDTGDTINQSTLPSQQNRFPDYLEAIPGTNVDLGTLEGDGMNIEGEEML  
PSLQEQALSSDILNDMESVLAATKLDKESFLTWL PMRLRKLKLPDSFFKPP

tr:A0A2R9CFK2\_PANPA [A0A2R9CFK2] SubName: Full=Yes associated protein 1  
{ECO:0000313|Ensembl:ENSPPAP00000040679}; 79..93

AGPGELEAFPSTGGEKGPSGGPPSGPGQPAPAATQAAPQAPPAGHQIVHVRGDSETDLEALFNAVMP  
KTANVPQTVPMRLRKLKLPDSFFKPPPEPKSHSRQASTDAGTAGALTPQHVRHSSPASLQLGAVSPGTLTPTGVVSG  
PAATPTAQHLRQSSFEIPDDVPLPAGWEMAKTSSGQRYFLNHIDQTTTWQDPRKAMLSQMNVTAPTSPVQQNMM  
NSASGPLPDGWEQAMTQDGEIYYINHKNKTTSWLDPRLDPRFAMNQRISSQAPVKQPPPLAPQSPQGGVMGGSNS  
NQQQMRLQQLQMEKERLRLKQEQELLRQVRPQAMRNINPSTANSPKCQELALRSQLPTLEQDGGTQNPVSSPGMS  
QELRTMTTNSSDPFLNSGTYHSRDESTDSGLSMSSYSVPRTPDFFLNSVDEMDTGDTINQSTLPSQQNRFPDYLE  
AIPGTNVDLGTLEGDGMNIEGEEMLPSLQEQALSSDILNDMESVLAATKLDKESFLTWL PMRLRKLKLPDSFFKPP

tr:A0A2R9CI69\_PANPA [A0A2R9CI69] SubName: Full=Yes associated protein 1 {ECO:0000313|Ensembl:ENSPPAP00000040718}; 70..84

XXXXXXXXXXXXXQPPSGPGQPAPAATQAAPQAPPAGHQIVHVRGDSETDLEALFNAVMPNPKTANVPQTV  
PMRLRKLKLPDSFFKPPPEPKSHSRQASTDAGTAGALTPQHVRHSSPASLQLGAVSPGTLTPTGVVSGPAATPTAQH  
LRQSSFEIPDDVPLPAGWEMAKTSSGQRYFLNHIDQTTTWQDPRKAMLSQMNVTAPTSPPPVQQNMNSASGPLPD  
GWEQAMTQDGEIYYINHKNKTTSWLDPRLDPRFAMNQIRISQSAPVKQPPPLAPQSPQGGVMGGSNSNQQQMRLQ  
QLQMEKERLRLKQOELLRQVRPQAMRNINPSTANSPKCQELALRSQLPTLEQDGGTQNPVSSPGMSQELRTMTN  
SSDPFLNSGTYHSRDESTDSGLSMSSYSVPRTPDDFLNSVDEMDTGDTINQSTLPSQQNRFPDYLEAIPGTNVDL  
GTLEGDGMNIEGELMPSLQEQALSSDILNDMESVLAATKLDKESFLTWL PMRLRKLKLPDSFFKPP

tr:A0A2R9APL7\_PANPA [A0A2R9APL7] SubName: Full=Uncharacterized protein {ECO:0000313|Ensembl:ENSPPAP00000019316}; 148..162

NPLSPSPPPPGRSPPAPSLRPLLTRPNELPREAAQPARPGASRLRRARRAGAGAGPXXXXXXXXXXXXX  
XXXXXXXXXXXXXXXXXXXXAAASLQSRSLAALFDSLHVPGGAEPVAAPAAAGLGGAGTGGAGGDVAGPAGATAIPGA  
RKVPLRARNLPPSFFTEPSRAGGGCGPSGPDVSLGDLEKGAEEVFFELLGPDYAGTEAAVLLAAEPLDVFP  
GASVLRGPPPELEPGLFEPFPAVVGNNLYPEPWSVPGCPPTKKSPLTAPRGGLTLNEPLRPLYPAAADSFGGEDG  
GHLASFAPFFPDICALPPPPPHQVSYDYSAGYSRTAYSSLWRSQDGVWEGAPGEEGAHRD  
PLRARNLPPSFFTEP

tr:F7DKK6\_HORSE [F7DKK6] SubName: Full=Family with sequence similarity 181 member A {ECO:0000313|Ensembl:ENSECAP00000015981}; 118..132

VMASDSVVMKLLNFVNLAASSDIKAALDKSAPCRRSVDHRKYLQKQLKRFSQKYSRLPRGLPGRGAEPHL  
KRGPEDRPGRLLALAGKALGNPYREECLSKEQTLQGNPEAARPGQVPMRKRQLPASFWEEPRTHSYPLGLEG  
GLGPREGPPYEGKKHKGLEPTAPVPASPRAPAEKEPLKMPGVSLVGRVNAWSCCPFYHGQPIYPGPPGALPQS  
VPVSLGLWRKSPASPGELAHFCKDVGPGQKVYRPVVLKPIPTKPAVPPPIFNVFGYL PMRKRQLPASFWEEP

tr:U6DXK6\_NEOVI [U6DXK6] SubName: Full=Chromosome 14 open reading frame 152, isoform CRA\_a {ECO:0000313|EMBL:CCP87720.1}; Flags: Fragment; 30..44

LGNPYREECLSKEQSLQRQNPAAARPGQVPMRKRQLPASFWEEPRAHSYSLGLEGELGPREGSPYEGK  
KPCCKGLEPWPDEMAPVPASPRAPAGKEPLKMSGVSLVGRVNAWGYCPFYHGQPIYAGPPGALPQSPVNLGLWR  
KSPASPGELAHFCKDVGPGQKVYRPVVLKPIPTKPAVPPPIFNVFGYL PMRKRQLPASFWEEP

tr:U6DAP2\_NEOVI [U6DAP2] SubName: Full=Yes-associated protein 1 {ECO:0000313|EMBL:CCP79172.1}; Flags: Fragment; 44..58

QAAPQAPPAGHQIVHVRGDSETDLEALFNAVMPNPKTANVPQTVPMRLRKLKLPDSFFKPPPEPKSHSRQAST  
DGGTGGALTPQHVRHSSPASLQLGAASPGSLTPTGVVSGPAATPTAQHLRQSSFEIPDDVPLPAGWEMAKTSSG  
QRYFLNHIDQTTTWQDPRKAMLSQMSVTAPTSPPPVQQSLMTSASGPLPDGWEQAMTQDGEIYYINHKNKTTSWL  
PRLDPRF PMRLRKLKLPDSFFKPP

tr:G3TYB5\_LOXAF [G3TYB5] SubName: Full=Family with sequence similarity 181 member A {ECO:0000313|Ensembl:ENSLAFP00000020573}; 131..145

VMASDSVVMKLLNFVNLAASSDIKAALDKSAPCRRSVDHRKYLQKQLKRFSQKYSRLPRGLPGRAAEPHL  
KRGPEDRSRLPLDSDHPSPSGVGGCKEKALGNPGREECLSRQEQTLQGNPEAAQPGQVPMRKRQLPASFWEE  
PRPAHSFPLGLEGLGAREGPPYEGKKTCCGLEPLGPETAPVPMSPRALAEKEPLKMPGVSLMGQVNAWSCCPFY  
YHGQPIYPGPPGALPQGSVNLGLWRTSPASTGELTPFCKDADGPGQKVYRPVVLKPIPTKPAVPPPIFNVFGYL  
PMRKRQLPASFWEEP

tr:A0A0D9RF42\_CHLSB [A0A0D9RF42] SubName: Full=Family with sequence similarity 181 member A {ECO:0000313|Ensembl:ENSCSAP00000007231}; 191..205

TPLEEKRSSGERNDAGYRKHRRPGEKKAGHKSQVSLVPFLGAAGHQSPSSWKASCSPGLVMASDSV  
KMLLNLFVNLAASSDIKAALDKSAPCRRSVDHRKYLQKQLKRFSQKYSRLPRGLPGRAAEPYLRKGSSEDRPGRLLLD  
LGPDSSPGGGGCKEKAPRNPYREECLAKEQLPQGHPEAAQPGQVPMRKRQLPASFWEEPRTHSYHVGLEGLG  
GPREGPPYEGKKNCKGLEPLGPEIVPVPMSPRALAEKEPLKMPGVSLVGRVNAWSCCPFYHGQPIYPGPLGALP  
QSPVPSLGLWKKSPAFPGELAHLCKDADGLGQKVCPRVVLKPIPTKPAVPPPIFNVFGYL  
PMRKRQLPASFWEEP

tr:A0A286ZNK4\_PIG [A0A286ZNK4] SubName: Full=Yes associated protein 1  
{ECO:0000313|Ensembl:ENSSSCP00000033204}; 13..27

MNPKTANVPQTVPMRLRKLKLPDSFFKPPPEPKSHSRQASTDAGTAGALTPQHVRHSSPASLQLGAI SPGT  
LTPTGVVSGPAATPTAQHLRQSSFEIPDDVPLPAGWEMAKTSSGQRYFLNHIDQTTTWQDPRKAMLSQMNVTAPT  
SPPVQONMMNSASGPLPDGWEQAMTQDGEIYYINHKNKTTSWLDPRLDPRFAMNQIRISQSAPVKQPPPLAPQSPQ  
GGVMGGSSNQOQMRLLQQLQMEKERLRLKQOELLRQAMRNINPSTANSPKCQELALRSQLPTLEQDGGTQNPVS  
SPGMSQELRTMTTNSDPFLNSGTYHSRDESTDSGLSMSSYSVPRTPDFFLNSVDEMDTGDTINQSTLPSQQNRF  
PDYLEAIPGTNVDLGTLEGDGMNIEGELMPSLQEQALSSDILNDMESVLAATKLDKESFLTWL  
PMRLRKLKLPDSFFKPP

tr:A0A287AIA3\_PIG [A0A287AIA3] SubName: Full=Yes associated protein 1  
{ECO:0000313|Ensembl:ENSSSCP00000043628}; 13..27

MNPKTANVPQTVPMRLRKLKLPDSFFKPPPEPKSHSRQASTDAGTAGALTPQHVRHSSPASLQLGAI SPGT  
LTPTGVVSGPAATPTAQHLRQSSFEIPDDVPLPAGWEMAKTSSGQRYFLNHIDQTTTWQDPRKAMLSQMNVTAPT  
SPPVQONMMNSASGPLPDGWEQAMTQDGEIYYINHKNKTTSWLDPRLDPRFAMNQIRISQSAPVKQPPPLAPQSPQ  
GGVMGGSSNQOQMRLLQQLQMEKERLRLKQOELLRQELALRSQLPTLEQDGGTQNPVSSPGMSQELRTMTTNS  
DPFLNSGTYHSRDESTDSGLSMSSYSVPRTPDFFLNSVDEMDTGDTINQSTLPSQQNRFPDYLEAIPGTNVDLGT  
LEGDGMNIEGELMPSLQEQALSSDILNDMESVLAATKLDKESFLTWL PMRLRKLKLPDSFFKPP

tr:A0A2K6A3S4\_MANLE [A0A2K6A3S4] SubName: Full=Yes associated protein 1  
{ECO:0000313|Ensembl:ENSMLEP00000034725}; 74..88

GGRTSCGQGRPRSPQRPFQFGPGMDPAFVVLFCFFAPPAGHQIVHVRGDSETDLEALFNAVMPKTANV  
PQTVPMRLRKLKLPDSFFKPPPEPKSHSRQASTDAGTAGALTPQHVRHSSPASLQLGAVSPGTLTPTGVVSGPAATP  
TAQHLRQSSFEIPDDVPLPAGWEMAKTSSGQRYFLNHIDQTTTWQDPRKAMLSQMNVTAPTSPPVQONMMNSASG  
PLPDGWEQAMTQDGEIYYINHKNKTTSWLDPRLDPRFAMNQIRISQSAPVKQPPPLAPQSPQGGVMGGSSNSNQOQ  
MRLQQLQMEKERLRLKQOELLRQVRPQAMRNINPSTANSPKCQELALRSQLPTLEQDGGTQNPVSSPGMSQELRT  
MTTNSDPFLNSGTYHSRDESTDSGLSMSSYSVPRTPDFFLNSVDEMDTGDTINQSTLPSQQNRFPDYLEAIPGT  
NVDLGTLEGDGMNIEGELMPSLQEQALSSDILNDMESVLAATKLDKESFLTWL PMRLRKLKLPDSFFKPP

tr:A0A287BCL2\_PIG [A0A287BCL2] SubName: Full=Uncharacterized protein  
{ECO:0000313|Ensembl:ENSSSCP00000054260}; 171..185

MIVPPLCSENVLVSSVAFPGAASRLQNSPSSWKAPCSGPLVMASDSVDMKMLLNFNVLASSDIKAALDK  
SAPCRRSVDHRKYLQKQLKRFSSQKYSRLPRGLPGRGAEPHLKRGPEDRPGRPLDTHGNSSPSGGGCKEKASGN  
PYREESLPKEQTLHGQDPEAARPGQVPMRKRQLPASFWEEPQPTHSYVPLEGGWAPGRDLPTTGRNTAKAWSPW  
GPRHPPGRPLRRSHSRCPGSPWGAIVSVPGAAAPSSSTTDSPTQAHQGPCLRARSPAWACGGRARLPASWPTSAR  
MRAAQRKCTDP PMRKRQLPASFWEEP

tr:A0A2K6A3X1\_MANLE [A0A2K6A3X1] SubName: Full=Yes associated protein 1  
{ECO:0000313|Ensembl:ENSMLEP00000034770}; 39..53

APPAGHQIVHVRGDSETDLEALFNAVMPKTANVPQTVPMRLRKLKLPDSFFKPPPEPKSHSRQASTDAGTA  
GALTPQHVRHSSPASLQLGAVSPGTLTPTGVVSGPAATPTAQHLRQSSFEIPDDVPLPAGWEMAKTSSGQRYFL  
NHIDQTTTWQDPRKAMLSQMNVTAPTSPPVQONMMNSASGPLPDGWEQAMTQDGEIYYINHKNKTTSWLDPRLDP  
RFAMNQIRISQSAPVKQPPPLAPQSPQGGVMGGSSNSNQOQMRLLQQLQMEKERLRLKQOELLRQELALRSQLPTLE  
QDGGTQNPVSSPGMSQELRTMTTNSDPFLNSGTYHSRDESTDSGLSMSSYSVPRTPDFFLNSVDEMDTGDTINQ  
STLPSQQNRFPDYLEAIPGTNVDLGTLEGDGMNIEGELMPSLQEQALSSDILNDMESVLAATKLDKESFLTWL  
PMRLRKLKLPDSFFKPP

tr:A0A2K5YCV9\_MANLE [A0A2K5YCV9] SubName: Full=Family with sequence  
similarity 181 member A {ECO:0000313|Ensembl:ENSMLEP00000013386};  
191..205

TPLEEKRSSGERNDAAYRKHRRPGEKKAGTAKQVSLVPFLGAAGHQQSPSSWKASCSPGLVMASDSV  
KMLLNFNVLASSDIKAALDKSAPCRRSVDHRKYLQKQLKRFSSQKYSRLPRGLPGRGAEPYLKRGSEDRPGRLLLD  
LGPDSSPGGGGCKEKALRNPYREECLAKEQLLQGHPEAAQPGQVPMRKRQLPASFWEEPRTHTSYHVPLEGGL  
GPREGPPYEGKNCKGLEPLGPEIVPVPMSPRALAEKEPLKMPGVS LVGRVNAWSCCFQYHGQPIYPGPLGALP  
QSPVPSLGLWKKSPAFPGELAHLC KDVDGLGQKVC RPVVLKPIPTKPAVPPPIFNVFGYL  
PMRKRQLPASFWEEP

tr:A0A287BEM1\_PIG [A0A287BEM1] SubName: Full=Uncharacterized protein  
{ECO:0000313|Ensembl:ENSSSCP00000054978}; 226..240

MLCIWRGAPDWPEGPPSSGDSSSIQPTRGLHNCLQPDHGARRPRGAWPRSAAGNLPGHLGRAPGPAPSV  
SSVAFPGAASRLQNSPSSWKAPCSGPLVMASDSDVKMLLNFNVLASSDIKAALDKSAPCRRSVDHRKYLQKQLKR  
FSQKYSRLPRGLPGRGAEPHLKRGPEDRPGRLPLDTGHNSSPSGGGGCKEKASGNPYREESLPKEQTLHGQDPEA  
ARPGQVPMRKRQLPASFWEEPQPTHSYVVGLEGGWAPGRDLPTTGRNTAKAWSPWGRPHPPGRPLRRSHSRCPGS  
PWGAVSVPGAAAPSTTDSPTQAHQGPCLRARSAPWACGGRARLPPASWPTSARMRRAQGRKCTDP  
PMRKRQLPASFWEEP

tr:A0A2K6A3U6\_MANLE [A0A2K6A3U6] SubName: Full=Yes associated protein 1  
{ECO:0000313|Ensembl:ENSMLEP00000034745}; 74..88

GGRTSCGQGRPRSPQRPFQFGPGMDPAFVVLFCSEFFAPPAGHQIVHVRGDSETDLEALFNAVMPKNTANV  
PQTVPMRLRKLKLPDSFFKPEPKSHSRQASTDAGTAGALTPQHVRHSSPASLQLGAVSPGTLTPTGVVSGPAATP  
TAQHRLRQSSFEIPDDVPLPAGWEMAKTSSGQRYFLNHIDQTTTWQDPRKAMLSQMNVTAPTSPFPVQNMNSASA  
MNQRISQSAPVKQPPLAPQSPQGGVMGGSNSNQOQMRLOQLQMEKERLRLKQQLLRLQELALRSQLEPTLEQDG  
GTQNPVSSPGMSQELRMTTNSSDPFLNSGTYSRDESTSDGLSMSSYSVPRTPDDFLNSVDEMDTGDITINQSTL  
PSQQNRFDPDYLEAIPGTNVLDLGTLEGDGMNIEGEEMLPSLQALSSDILNDMESVLAATKLDKESFLTWL  
PMRLRKLKLPDSFFKPP

tr:L8IIT5\_9CETA [L8IIT5] SubName: Full=Protein **FAM181A**  
{ECO:0000313|EMBL:ELR56048.1}; Flags: Fragment;161..175

RQVGSVLFPGAASCLNPASSWKARCSGALVMASDSDVKMLLNFNVLASSDIKAALDKSAPCRRSVDHR  
KYLQKQLKRFSQKYSRLPRGLPGRGAEPHLKRGPEDRSGRPLPLESHGHSSPGGGGGCKEKALGNLDREESLSKE  
RTLHGPDPGAARPGQVPMRKRQLPASFWEEPPTHSYVVGLEGGLPREGPPYEGKKHCKGLEPLGPETTPVPTS  
PRAPAEKEPLKMPGVS LVGRVSAWSCCPFYHGQPVYPSPPGALPQSPMPSLGLWRKSAASPGELAHFCKDAEGP  
GQKVYRPVVLKPIPTKPAVPPPIFNVFGYL PMRKRQLPASFWEEP

tr:G1S3Q5\_NOMLE [G1S3Q5] SubName: Full=Family with sequence similarity  
181 member B {ECO:0000313|Ensembl:ENSNLEP00000020143}; 219..233

MAVQAALLSTHPFVFPFGGGSPDGLGGAFGLDLDKCCFEDDETGAAGALLSGVEGGDVREATRDLLSF  
IDSASSNIKLALDKPGKSKRVNHRKYLQKQIKRCSGLMGAAPPGPSAADTPAKRPLAAPSAPTVAAPAHGK  
AAPRREASQAAAAAFLQSLAALFDSLHHPGGAEPAGGAVAAPAAGLGGAGTGGAGGDAAGPAGATAIPGARKVP  
LRARNLPPSFFTEPSRAGGGGCGSPGPDVSLGDLEKGAEAFFELLGPDYAGATEAAVLLAAEPLDVFPAGASV  
LRGPPPELEPGLFEPPPAVGNLLYPEPWSVPGCPPTKKSPLTAPRGGLTLNEPLRPLYPAAADSPGGEDGPGHLA  
SFAPFFPDCALPPPPPHQVSYDYSAGYSRTAYSSLWRS DGVWEGAPGEEGAHRD PLRARNLPPSFFTEP

tr:G1S5Y3\_NOMLE [G1S5Y3] SubName: Full=Family with sequence similarity  
181 member A {ECO:0000313|Ensembl:ENSNLEP00000020921}; 167..181

TPLEERRSSGESNDAAHKTHRRPGEKRAEHSKVSVPFLGAAGHQQLPSSWKASCGLVMASDSDVK  
MLLNFNVLASSDIKAALDKSAPCRRSVDHRKYLQKQLKRFSQKYSRLPRGLPGRAAEPYLKRGSEDRPGRNPYRE  
ECLAKEQLPQGQHPEAAQPGQVPMRKRQLPASFWEEPPTHSYHVGLEGGLPREGPPYEGKKNCKGLEPLGPET  
TPVPMSPRVLVEKEPLKMPGVS LVGRVNAWSCCPFYHGQPIYPGLGALPQSPVPSLGLWRKSPAAPPGELAHLC  
KDAGGLGQKVCPRVVLKPIPTKPAVPPPIFNVFGYL PMRKRQLPASFWEEP

tr:J9NZN3\_CANLF [J9NZN3] SubName: Full=Family with sequence similarity  
181 member B {ECO:0000313|Ensembl:ENSCAFP00000038753}; 221..235

MAVQAALLSTHPFVFPFGGGSPDALGGAFGALDLDKCCFEDDEPGPPAGALLAGAEGGDVREATRDLLSF  
MDSASSNIKLALDKPGKSKRVNHRKYLQKQIKRCSGLMGAAPPGPSGAADAPAKRPLGAAGAQAAGVAGPPPGK  
AAPRREASQAAAANSLQSRSLAALFDSLRLHVPAGDERPGASGAAPAAALGAAGAGGSGDAAGPAGGTAGPGARK  
VPLRARNLPPSFFTEPSRAGRGCGSPGPGVSLGDLEKGADEILELLAAGSGTGAGAGAGVLLAAEPLVFPAG  
AAVLRGPPPELEPGLFEPPAATVGALLYPEPWSAPGCPPAKRPPPAAPRGGLALTEPLRPAYPAAADCQGGEDAPG  
LLASFAPFFSDCALPPQPPPHQVSYEYAGAGYGRSGYAGLWRPDAAWEGAPGEEGAPRD PLRARNLPPSFFTEP

tr:J9NTW6\_CANLF [J9NTW6] SubName: Full=Family with sequence similarity  
181 member A {ECO:0000313|Ensembl:ENSCAFP00000036602}; 193..207

MQRQEERGLGELLEKSGRPAQKNKNLAAKCGTWERVSSVPFPGAASHQQSPSSWKAPCSGPLVMASDS  
DVKMLLNFNVLASSDIKAALDKSAPCRRSVDHRKYLQKQLKRFSQKYSRLPRGLPGRGAEPHLKRGAE DRPGRLP  
LGSGHDSSTGEGGGCKEKALGNPYREECLSKEQTLQRQNEAARPGQVPMRKRQLPASFWEEPPTHSYPLGLEG  
GLGPREGPPYESKKHCKGLEPLDPETAPVPTSPRAPAEKEPLKMSGVSLVGRVNAWSCCPFYHGQPVYAGPPGA  
LPQSPVPGLGLWRKSPASPGELAHFCKHVDGPGQKVYRPVVLKPIPTKPAVPPPIFNVFGYL  
PMRKRQLPASFWEEP

tr:F1PKW9\_CANLF [F1PKW9] SubName: Full=Family with sequence similarity  
181 member A {ECO:0000313|Ensembl:ENSCAFP00000025965}; 169..183

MAAVGLESLGEVSSVFPFGAASHQQSPSSWKAPCSGPLVMASDSVDMKMLLNFNVLASSDIKAALDKSA  
PCRRSVDHRKYLQKQLKRFSQKYSRLPRGLPGRGAEPHLKRGAEPRGRLPLGSGHDSSTGEGGGCKEKALGNPY  
REECLSKEQTLQRONPEAARPGQVPMRKRQLPASFWEEPRTHTSYPLGLEGLGPREGPPYESSKKHCKGLEPLDP  
ETAPVPTSPRAPAEKEPLKMSGVSLVGRVNAWSSCCPFQYHGQPVYAGPPGALPQSPVPLGLLWRKSPASPGELAH  
FCKHVDGPGQKVYRPVVLKPIPTKPAVPPPIFNVFGYL PMRKRQLPASFWEEP

tr:A0A2I2Y768\_GORGO [A0A2I2Y768] SubName: Full=Family with sequence  
similarity 181 member A {ECO:0000313|Ensembl:ENSGGOP00000030748};  
191..205

TPLEERRSSGERNDAAHTNHRPGEKRASTAKQVSSVSFLGAASHQQSLSSSWKASCSGPLVMASDSV  
KMLLNFNVLASSDIKAALDKSAPCRRSVDHRKYLQKQLKRFSQKYSRLPRGLPGRGAEPYLRKGSSEDRPRRLLLD  
LGPDSSPGGGGGCKEKVLRNPYREECLAKEQLPQRQHPEAAQPGQVPMRKRQLPASFWEEPRTHTSYHVGLEGL  
GPREGPPYEGKKNCKGLEPLGPETTLVPMSPRALAEKEPLKMPGVSLVGRVNAWSSCCPFQYHGQPIYPGPLGALP  
QSPVPSLGLWRKSPAFPGELAHCKDVDGLGQKVCPRVVLKPIPTKPAVPPPIFNVFGYL  
PMRKRQLPASFWEEP

tr:D2HS97\_AILME [D2HS97] SubName: Full=Uncharacterized protein  
{ECO:0000313|EMBL:EFB15216.1}; Flags: Fragment; 70..84

EGGDVREATRDLLSFIDSASSNIKLALDKPGKSKRKVNHRKYLQKQIKRCSGLMGAAPPGPSGAAKV  
PLRARNLPPSFFTEPSRAGGGGXGAAGPGVSLGDLEKGAEEVEFFELLGPDYAGATEASVLLAAEPLDVFPTGAA  
VLRGPPPELEPGLFEPPPAMVGSLLYSESWSAPGXPSAKKPPLAAPRGGLTLNEPLRPLYPSAADSPGGEDGPGLL  
ASFAPFFSDCALPPPPPHQVSYEYSAGYSRTAYSSSLWRPDGVWEGAPGEEGAHRD PLRARNLPPSFFTEP

tr:G3RHC5\_GORGO [G3RHC5] SubName: Full=Family with sequence similarity  
181 member A {ECO:0000313|Ensembl:ENSGGOP00000015043}; 169..183

MAAVGLESLGEVSSVSFLGAASHQQSLSSSWKASCSGPLVMASDSVDMKMLLNFNVLASSDIKAALDKSA  
PCRRSVDHRKYLQKQLKRFSQKYSRLPRGLPGRGAEPYLRKGSSEDRPRRLLLDLGPDSSPGGGGGCKEKVLRNPY  
REECLAKEQLPQRQHPEAAQPGQVPMRKRQLPASFWEEPRTHTSYHVGLEGLGPREGPPYEGKKNCKGLEPLGP  
ETTLVPMSPRALAEKEPLKMPGVSLVGRVNAWSSCCPFQYHGQPIYPGPLGALPQSPVPSLGLWRKSPAFPGELAH  
LCKDVDGLGQKVCPRVVLKPIPTKPAVPPPIFNVFGYL PMRKRQLPASFWEEP

tr:K9ITQ5\_DESRO [K9ITQ5] SubName: Full=Putative ubiquitin protein ligase  
rsp5/nedd4 {ECO:0000313|EMBL:JAA51862.1}; Flags: Fragment; 45..59

SQAAPQAPPAGHQIVHVRGDSETDLEALFNAVMPNKTANVPQTVPMRLRKLKLPDSFFKPPPEPKSHSRQAS  
TDAGSAGALTPQHVAHSSPASLQLGAVSPGTLTPTGVVSGPAATPTAQHLRQSSFEIPDDVPLPAGWEMAKTSS  
GQRYFLNHIDQTTTWDPRKAMLSQLNVTAPTSPVQONMMNSASGPLPDGWEQAMTQDGEIYYINHKNKTTSWL  
DPRLDPRFAMNQRIQSAPVKQPPPLAPQSPQGGVMGGGNSNQQQMRLQQLQMEKERLRLKQQLLQELALRS  
QLPTLEQDGGTQNPVSSPGMSQELRTMTTNSDPPFLNSGTYHSRDESTDSGLSMSSYSVPRTPDFFLNSVDEMDT  
GDTINQSTLPSQQNRFPDYLEAIPGTNVDLGTLEGDMNIEGEEELMPSLQEQALSSDILNDMESVLAATKLDKESF  
LTWL PMRLRKLKLPDSFFKPP

tr:K9ISJ3\_DESRO [K9ISJ3] SubName: Full=Putative ubiquitin protein ligase  
rsp5/nedd4 {ECO:0000313|EMBL:JAA51843.1}; Flags: Fragment; 40..54

QAPPAGHQIVHVRGDSETDLEALFNAVMPNKTANVPQTVPMRLRKLKLPDSFFKPPPEPKSHSRQASTDAGS  
AGALTPQHVAHSSPASLQLGAVSPGTLTPTGVVSGPAATPTAQHLRQSSFEIPDDVPLPAGWEMAKTSSGQRYF  
LNHIDQTTTWDPRKAMLSQLNVTAPTSPVQONMMNSASGPLPDGWEQAMTQDGEIYYINHKNKTTSWLDPRLD  
PRFGKAMNQRIQSAPVKQPPPLAPQSPQGGVMGGGNSNQQQMRLQQLQMEKERLRLKQQLLQELALRSQLP  
TLEQDGGTQNPVSSPGMSQELRTMTTNSDPPFLNSGTYHSRDESTDSGLSMSSYSVPRTPDFFLNSVDEMDT  
GDTINQSTLPSQQNRFPDYLEAIPGTNVDLGTLEGDMNIEGEEELMPSLQEQALSSDILNDMESVLAATKLDKESFL  
L PMRLRKLKLPDSFFKPP

tr:K9J2W4\_DESRO [K9J2W4] SubName: Full=Putative ubiquitin protein ligase  
rsp5/nedd4 {ECO:0000313|EMBL:JAA51926.1}; Flags: Fragment; 40..54

QAPPAGHQIVHVRGDSETDLEALFNAVMPNKTANVPQTVPMRLRKLKLPDSFFKPPPEPKSHSRQASTDAGS  
AGALTPQHVAHSSPASLQLGAVSPGTLTPTGVVSGPAATPTAQHLRQSSFEIPDDVPLPAGWEMAKTSSGQRYF  
LNHIDQTTTWDPRKAMLSQLNVTAPTSPVQONMMNSASGPLPDGWEQAMTQDGEIYYINHKNKTTSWLDPRLD  
PRFGKAMNQRIQSAPVKQPPPLAPQSPQGGVMGGGNSNQQQMRLQQLQMEKERLRLKQQLLQELLRQVPRQAMRNI

NPSTANSPKCQELALRSQLPTLEQDGGTQNPVSSPGMSQELRTMTTNSSDPFLNSGTYHSRDESTDSGLSMSSYS  
VPRTPDFFLNSVDEMDTGDITINQSTLPSQQNRFPDYLEAIPGTNVDLGTLEGDGMNIEGEELMPSLQEQALSSDIL  
NDMESVLAATKLDKESFLTWL PMRLRKL PDSFFKPP

tr:G7PBC7\_MACFA [G7PBC7] SubName: Full=Uncharacterized protein  
{ECO:0000313|EMBL:EHH63846.1}; Flags: Fragment;190..204

PLEEKRSSGERNDAAYRKHRRPGEKKAGHSKAVSLVPFLGAAGHQQSPSSWKASCGLVMASDSQV  
MLLNFNVLASSDIKAALDKSAPCRRSVDHRKYLQKQLKRFSQKYSRLPRGLPGRAAEPYLKRGSEDRPGRLLLLL  
GPDSSPGGGGGCKEKALRNYPYREECLAKEQLPQGQHPAAQPGQVPMRKRQLPASFWEEP RPPTHSHYVGLGGLG  
PREGPPYEGKKNCKGLEPLGPEIVPVPMSPRALAEKEPLKMPGVSLVGRVNAWSCCPFYHGQPIYPGPLGALPQ  
SPVPSLGLWKKSPAFFGELAHLCCKDADGLGQKVCRPVVLKPIPTKPAMPPPIFNVFGYL  
PMRKRQLPASFWEEP

tr:A0A2K5V0J7\_MACFA [A0A2K5V0J7] SubName: Full=Family with sequence  
similarity 181 member A {ECO:0000313|Ensembl:ENSMFAP00000018250};  
191..205

TPLEEKRSSGERNDAAYRKHRRPGEKKAGTAKQVSLVPFLGAAGHQQSPSSWKASCGLVMASDSQV  
KMLLNFNVLASSDIKAALDKSAPCRRSVDHRKYLQKQLKRFSQKYSRLPRGLPGRAAEPYLKRGSEDRPGRLLLLL  
LGPDSSPGGGGGCKEKALRNYPYREECLAKEQLPQGQHPAAQPGQVPMRKRQLPASFWEEP RPPTHSHYVGLGGLG  
GPREGPPYEGKKNCKGLEPLGPEIVPVPMSPRALAEKEPLKIPGVSLVGRVNAWSCCPFYHGQPIYPGPLGALP  
QSPVPSLGLWKKSPAFFGELAHLCCKDADGLGQKVCRPVVLKPIPTKPAVPPPIFNVFGYL  
PMRKRQLPASFWEEP

tr:G1QDK3\_MYOLU [G1QDK3] SubName: Full=Family with sequence similarity  
181 member B {ECO:0000313|Ensembl:ENSMLUP00000021786}; 174..188

MAVQAALLSTHPFVFPFGGGSPDGLGGAFGALDKCCFEDDEPGMPAGALLAGTEGGDAREATRDLISF  
IDSASSNIKLALDKPSKSKRVNHRKYLQKQIKRCSGLMGAAPAGPPSPGAADTPAKRALGTPGAQTAAPVAPRQ  
GPPRERALGVREEMLPALRGTAAPGARKVPLRARNLPPSFFTEPSRASGGGCGPSGCSVNLCDLEKGPETLEFLE  
LLGPDYAGSEAGVLLPAEPLDVFPTGATVLRGPPELEPLGFEPAMGGSLPYPEPWSAPACPATKKPSLAPPR  
GGSTLTEPLRLLYPAAVNSPGGEDGPGPLASFGPFFSDCVLPQPPPPQPRQVAYDVCAGYGRYAYSSLRPDGL  
WEGDPGEEGAPRD PLRARNLPPSFFTEP

tr:G1PSC1\_MYOLU [G1PSC1] SubName: Full=Family with sequence similarity  
181 member A {ECO:0000313|Ensembl:ENSMLUP00000014064}; 221..235

MVTICDGKECGNALPLGCFVSGEALLIGLRPQLWGLVLHSAHSRAAQLLPAGQPELAGRAGLTQVSPV  
PFPGAARTSRPPSSWKARCSGLVMASDSQV KMLLNFNVLASSDIKAALDKSAPCRRSVDHRKYLQKQLKRFSQKY  
SRLPRGLPGRAEPPRRGPEDRPGRLPLNPGPDASPSGGDCKEKALGNYPYREECLSREQLTQGNPGAARPGQ  
VPMRKRQLPASFWEEP RPPTHSHYVVALEGLVGPREGPPYCKKHCRLGELFGPDMALIPMSPRALAEKEPKLP  
SLVGRVNAWSCCPFYHGQPIYPGPPGALPPGPVPSLGLWRKSPASPGELAHKADVDGPGQKVHRPVVLKPIPT  
KPAMPPPIFNVFGYL PMRKRQLPASFWEEP

tr:G1U198\_RABIT [G1U198] SubName: Full=Yes associated protein 1  
{ECO:0000313|Ensembl:ENSOCUP00000023132}; 13..27

MNPKTANVPQTPMRLRKL PDSFFKPPPEPKSHSRQASTDAGTAGALTPQHVRHSSPASLQLGAVSPGT  
LTPTGVVSGPAATPTTQHLQSSFEIPDDVPLPAGWEMAKTSSGQRYFLNHIDQTTTWDPRKAMLSQMNVTAP  
TSPPVQONMMNSASGPLPDGWEQAMTQDGEIYYINHKNKTTSWLDPRLDPRFAMNQRISQSAPVKQPPPLAPQSP  
QGGVMGGSSNQQQMRLQQLQMEKERLRLKHQELLRQAMRNINPSTANSPKCQELALRSQLPTLEQDGGTQNPV  
SSPGMSQELRTMTTNSSDPFLNSGTYHSRDESTDSGLSMSSYSVPRTPDFFLNSVDEMDTGDITINQSSLPSQQNR  
FPDYLEAIPGTNVDLGTLEGDGMNIEGEELMPSLQEQALSSDILNDMESVLAATKLDKESFLTWL  
PMRLRKL PDSFFKPP

tr:L5L0E6\_PTEAL [L5L0E6] SubName: Full=65 kDa Yes-associated protein  
{ECO:0000313|EMBL:ELK16513.1}; 298..312

METATLMRSQYHDGSRGAGGFGRLLQLIPASENLPIFEHAGDNQPAPPVVRGRGARREEPLGLGGCGDV  
GQASRPRGLDRPHPEMLGRIQAQAFGFDQKFQAYRKDDFVMVGTEVKKIEAINVPCTQLSMSFFNRLYDENIVR  
DSGHIVKCLDSFCDPFLISDELKRVLLVEDSEKYEVSQPDREEFLFLFKHLCLGGALCQYEDVNLNYPLETTKL  
IYKDLVSVRKNPQTKKIQTSSIFKVTAYPAPPGSQAASQAPPAGHQIVHVRGDSETDLEALFNAVMPKTANVP  
QTPMRLRKL PDSFFKPPPEPKSHSRQASTDAGTAGALTPQHVRHSSPASLQLGAVSPGALPTPTGVVSGPAATPT  
AQHLRQSSFEIPDDVPLPAGWEMAKTSSGQRYFLNHIDQTTTWDPRKAMLSQMNVTAPTSPPVQONMMNSASGP



LPDGWEQAMTQDGEIYYINHKNKTTSWLDPRLDPRFAMNQRISQSAPVKQPPPLAPQSPQGGVMGGGNSNQQQQM  
RLQQLQMEKERLRLKQQLLQAMRNINPSTANSPKCQELALRSQLPTLEQDGGTQNPVSSPGMSQELRTMTTNS  
SDPFLNSGTYHSRDESTDSGLSMSSYSVPRTPDDFLNSVDEMMDTGD SINQSTLPSQQNRFPDYLEAIPGTNVDLG  
TLEGDMNIEGEELMPSLQEQALSSDILNDMESVLAATKLDKESFLTWL PMRLRKLPSDFKPP

tr:A0A2K6BGS7\_MACNE [A0A2K6BGS7] SubName: Full=Family with sequence  
similarity 181 member A {ECO:0000313|Ensembl:ENSMNEP00000010610};  
191..205

TPLEEKRSSGERNDAAYRKHRRPREKKAGTAKQVSLVPFLGAAGHQSPSSWKASCSPGLVMASDSDV  
KMLLNFNVLASSDIKAALDKSAPCRRSVDHRKYLQKQLKRFSSQKYSRLPRGLPGRAAEPYLKRGSEDRPGRLLLL  
LGPDSSPGGGGGCKEKVLRNPYREECLAKEQLPQQQHPEAAQPGQVPMRKRQLPASFWEEP RP THSYHVGLEGLL  
GPREGPPYEGKKNCKGLEPLGPEIVPVPMSPRALAEKEPLKMPGVS LVGRVNAWSCCPFYHGQPIYPGPLGALP  
QSPVPSLGLWKKSPAFPGELAHLCADGLGQKVCPRVVLKPIPTKPAVPPPIFNVFGYL  
PMRKRQLPASFWEEP

tr:A0A091CSR7\_FUKDA [A0A091CSR7] SubName: Full=Protein **FAM181A**  
{ECO:0000313|EMBL:KFO21372.1}; 298..312

MRRRKRNRNKRKRRKAGQGSWLPKPKPHGALPFLESHRYRAPSUYQPYATCFLYISSLSSPQPADILVSS  
FTIGQNGPPVDGKHQPD DARRSWKEGAGPGTNLLDPGTSTVSDFGGSAWWKSRAYERLPKTEFDSQEAPDQGP  
TLLRAASPLQRAPSSWKAPHPGPLVMASDTDVKMLLNFNVLASSDIKAALDKSAPCRRSVDHRKYLQKQLKRFSSQ  
KYSRLPRGLPGRAAEPHLKRGPEDRPGRLLLLHPGPDSPGGGGGGCKEKALGSPFGEECLSKEQILQGGGLGAAKP  
GQVPMRKRQLPASFWEEP RP THSYPMGLEGLLGPREGSPYESSKNCKGLESSVPEAAPGPMSPRVLANKEPLKMP  
GVSLVGCVDWASCCPFYHGQPIYPSPPGALPPSPLPSLGLWRKSPALPAELAHFCKHVDSPGQKVYRPMVLKPI  
PTKPAVPPPIFNVFSYL PMRKRQLPASFWEEP

tr:R9PXS9\_RAT [R9PXS9] SubName: Full=Transcriptional coactivator YAP1  
{ECO:0000313|Ensembl:ENSRNOP00000007866}; 70..84

MEPAQQPPPQAPQGPAPPSVSPAGTPAAPPAPPAGHVHVHVRGDSSETDLEALFNAVMNPKTANVPQTV  
PMRLRKLPSDFKPPPEPKSHSRQASTDAGTAGALTPQHVRHSSPASLQLGAGTLTASGVVSGPAATPAAQHLRQ  
SSFEIPDDVPLPAGWEMAKTSSGQRYFLNHNDQTTTWQDPRKAMLSQLNVPTSASPAVQTLMNSASGPLPDGWE  
QAMTQDGEVYYINHKNKTTSWLDPRLDPRFAMNQRITQSAPVKQPPPLAPQSPQGGV LGGGSSNQQQQIQLQQLQ  
MEKERLRLKQQLFRQVRPQEV LNGISSPQPVALTGAGWRDSECSVFSRDDSGIEDNDNQ  
PMRLRKLPSDFKPP

tr:A0A0G2K0Y6\_RAT [A0A0G2K0Y6] SubName: Full=Transcriptional coactivator  
YAP1 {ECO:0000313|Ensembl:ENSRNOP00000071631}; 13..27

MNPKTANVPQTVPMRLRKLPSDFKPPPEPKSHSRQASTDAGTAGALTPQHVRHSSPASLQLGAGTLTA  
SGVVSGPAATPAAQHLRQSSFEIPDDVPLPAGWEMAKTSSGQRYFLNHNDQTTTWQDPRKAMLSQLNVPTSASPA  
VPQTLMNSASGPLPDGWEQAMTQDGEVYYINHKNKTTSWLDPRLDPRFAMNQRITQSAPVKQPPPLAPQSPQGGV  
LGGGSSNQQQQIQLQQLQMEKERLRLKQQLFRQAIRNINPSTANAPKCQELALRSQLPSLEQDGGTQNAVSSPG  
MTQELRTMTTNSDPFLNSGTYHSRDESTDSGLSMSSYSIPRTPDDFLNSVDEMMDTGD TISQSTLPSQQSRFPDY  
LEALPGTNVDLGTLEGDMNIEGEELMPSLQEQALSSEILDVESVLAATKLDKESFLTWL  
PMRLRKLPSDFKPP

tr:A0A250Y0P1\_CASCN [A0A250Y0P1] SubName: Full=Transcriptional  
coactivator YAP1 {ECO:0000313|EMBL:JAV37197.1}; 13..27

MNPKTANVPQTVPMRLRKLPSDFKPPPEPKSHSRQASTDAGTAGALTPQHVRHSSPASLQLGAVSPGT  
LTPAGGVSGPAATPTAQHLRQPSFEIPDDVPLPAGWEMAKTSSGQRYFLNHIDQTTTWQDPRKAMLSQMNVTAPT  
SPPVPQNMNSASGPLPDGWEQAMTQDGEIYYINHKNKTTSWLDPRLDSRFAMNQRISQSAPVKQPPPMAPQSPQ  
GGVMGGGNSQQQMLQQLQMEKERLRLKQQLLQAMRNINPSTANSPKCQELALRSQLPTLEPDGGTQNPVSS  
PGMSQELRTMTTNSDPFLNSGTYHSRDESTDSGLSMSSYSVPRTPDDFLNSVDEMMDTGD TINQSTLPSQQNRFP  
DYLEAIPGTNVDLGTLEGDMNIEGEELMPSLQEQALSSDILNDMESVLAATKLDKESFLTWL  
PMRLRKLPSDFKPP

tr:G5AXI8\_HETGA [G5AXI8] SubName: Full=Protein **FAM181A**  
{ECO:0000313|EMBL:EHB01749.1}; Flags: Fragment; 151..165

LLRAASPLQKAPSSWKAPCSGPLVMASDTDVKMLLNFNVLASSDIKAALDKSAPCRRSVDHRKYLQKQL  
KRFSSQKYSRLPRGLPGRAAEPHLRRGPQDRPGRALALHPGPDSPGGGGGGCKEKALGSPFGEECLSKEQNLQGGPA  
AKPGQVPMRKRQLPASFWEEP RP THSYAMGLEGLLGP RERSPYESSKNCKGLESMVPEAAPGPMSPRALADKEPL

KMPGVSLVGCVDAWSCCPFYHRQPIYPPGGALPPSPMPSLGLWRKSPALPPEQAHFCKRVDGPGQKVYRPVVL  
KPIPTKPAMPPPIFNIFGYL PMRKRQLPASFWEEP

tr:A0A1A6HND2\_NEOLE [A0A1A6HND2] SubName: Full=Uncharacterized protein  
{ECO:0000313|EMBL:OBS79237.1}; 129..143

MAADSDVKMLLNFNVLASSDIKAALDKSAPCRRSVDHRKYLQKQLKRFSQKYSRLPRGLPGRVTEPHLQ  
RGPEERPGQLPLHSCPESSPGGGGICKEKVLGTFREDCLSKEQSFGGLNPEAARPGQLPMRKRQLPASFWEEP  
PTLSYPMGLEVGLAPREASLYENKKNCKGLES LGPETAPLPMSPRVLADMEPLKMSGVSLVGS LDAWSYCPFQYH  
GQPIFPSLPGVLPQGPVPSLGLWRKSPASPVELTHFCKD VDSPGPKVYRPVVLKPIPTKPAMPPPIFNVFGYL  
PMRKRQLPASFWEEP

tr:A0A1A6HHX5\_NEOLE [A0A1A6HHX5] SubName: Full=Uncharacterized protein  
{ECO:0000313|EMBL:OBS78168.1}; Flags: Fragment;218..232

MAVQAALLTSHFPFIPFGFGGSADGLVSSFGSLDKGCCFEDDESGAPAGALLSGSEGGDVREATRDLLSF  
IDSASSNIKALDKPGKSKRKVNHRKYLQKQIKRCSGLMGTAPPGPPSPSTADAPVKRPPGAQGAPTVAAPAHCK  
ATPRREATQAAAAASLQSRSLAALFDSLHHPGGAEPAGGAVAVSVPLGAASPAGDGAGTSGSSAASGTRKVP  
RARNLPPSFFTEPSRVGGSGSSGGCGPSGQAVSLGDLEKGAEEVEFFELLAPXFGAGNDSGALLAAEPLDAFPA  
GATVLRGPLELESGPFEQPAMVGNLLYPEPWSAPSCPQTKKPPLASVRGGVTLNEPVRLLYPTALDSPDCALPPP  
HQMSYDYSAGYSRAVYPSLWRPDGVTNLPE PLRARNLPPSFFTEP

tr:G3UYA6\_MOUSE [G3UYA6] SubName: Full=Transcriptional coactivator YAP1  
{ECO:0000313|Ensembl:ENSMUSP00000134007}; 70..84

MEPAQQPPPQPAPQGPAPPSVSPAGTPAAPPAPPAGHQVVHVRGDSETDLEALFNAMNPKTANVPQTV  
PMRLRKL PDSFFKPPPEPKSHSRQASTDAGTAGALTPQH VRAHSSPASLQLGAVSPGTLTASGVVSGPAAAAPAAQH  
LRQSSFEIPDDVPLPAGWEMAKTSSGQRYFLNHNDQTTTWQDPRKAMLSQLNVPAPASPAVPQTLMNSASG  
PLPDGWEQAMTQDGEVYYINHKNKTTSWLDPRLDPRFAMNQ RITQSAPVKQPPPLAPQSPQGGV  
LGGGSSNQQQIQLQLQMEKERLRLKQOELFRQTVRLGISSAQPVAYTGAGWRDSECSVFSWDVSGIENNDNQ  
PMRLRKL PDSFFKPP

tr:G3UYV4\_MOUSE [G3UYV4] SubName: Full=Transcriptional coactivator YAP1  
{ECO:0000313|Ensembl:ENSMUSP00000134237}; 70..84

MEPAQQPPPQPAPQGPAPPSVSPAGTPAAPPAPPAGHQVVHVRGDSETDLEALFNAMNPKTANVPQTV  
PMRLRKL PDSFFKPPPEPKSHSRQASTDAGTAGALTPQH VRAHSSPASLQLGAVSPGTLTASGVVSGPAAAAPAAQH  
LRQSSFEIPDDVPLPAGWEMAKTSSGQRYFLNHNDQTTTWQDPRKAMLSQLNVPAPASPAVPQTLMNSASG  
PLPDGWEQAMTQDGEVYYINHKNKTTSWLDPRLDPRFAMNQ RITQSAPVKQPPPLAPQSPQGGV  
LGGGSSNQQQIQLQLQMEKERLRLKQOELFRQAIRNINPSTANAPKCQTVRLGISSAQPVAYTGAGWRDSECSVFSWDVSGIENNDNQ  
PMRLRKL PDSFFKPP

tr:G3UY62\_MOUSE [G3UY62] SubName: Full=Transcriptional coactivator YAP1  
{ECO:0000313|Ensembl:ENSMUSP00000133959}; 70..84

MEPAQQPPPQPAPQGPAPPSVSPAGTPAAPPAPPAGHQVVHVRGDSETDLEALFNAMNPKTANVPQTV  
PMRLRKL PDSFFKPPPEPKSHSRQASTDAGTAGALTPQH VRAHSSPASLQLGAVSPGTLTASGVVSGPAAAAPAAQH  
LRQSSFEIPDDVPLPAGWEMAKTSSGQRYFLNHNDQTTTWQDPRKAMLSQLNVPAPASPAVPQTLMNSASG  
PLPDGWEQAMTQDGEVYYINHKNKTTSWLDPRLDPRFAMNQ RITQSAPVKQPPPLAPQSPQGGV  
LGGGSSNQQQIQLQLQMEKERLRLKQOELFRQEVPKTVRLGISSAQPVAYTGAGWRDSECSVFSWDVSGIENNDNQ  
PMRLRKL PDSFFKPP

tr:A0A140LHM6\_MOUSE [A0A140LHM6] SubName: Full=Protein **FAM181B**  
{ECO:0000313|Ensembl:ENSMUSP00000146473}; 215..229

MAVQAALLSSHFPFIPFGFGGSADGLVSAFGLDKGCCFEDDESGATAGALLSGSEGGDVREATRDLLSF  
IDSASSNIKALDKPGKSKRKVNHRKYLQKQIKRCSGLMGTAPPRPASPSAADAPAKRPPGAPTVAATPAHCKA  
APRREATQAAAAASLQSRSLAALFDSL RHIPGGAETAGGAEAVSVPLGAASAVGDGAGTAVSSVAPGTRK  
VPLRARNLPPSFFTEPSRVGCGGASGVPSGQGVSLGDLEKGAEEVEFFELLAPDFGSGNDSGVLMAADPLD  
PFPAGATVLRGPLELESGPFEQPAMVGNLLYPEPWNTPELSSDQEASCGWRSRRRDLERACAPPVPHSLGL  
SRWGGRASLVFFHP LLPRLCVAAPSGVL PLRARNLPPSFFTEP

tr:Q3U046\_MOUSE [Q3U046] SubName: Full=Uncharacterized protein  
{ECO:0000313|EMBL:BAE34009.1}; Flags: Fragment;>gp:AK157234\_1 [AK157234]  
Mus musculus activated spleen cDNA, RIKEN full-length enriched library,

clone:F830207J03 product:yes-associated protein, full insert sequence. [Mus musculus] 138..152

LGVWSQSFCLSWDAAAAGGKEREEGRSSRRGGEERGGGLGQGVQGDAGPRRSPPNLSAVPRASNEAAAM  
EPAQQPPPPQAPQGPAPPSVSPAGTPAAPAPPAGHQVVHVRGDSETDLEALFNAVMPKNTANVPQTVPMRLRKL  
PDSFFKPPPEPKSHSRQASTDAGTAGALTPQHVRHSSPASLQLGAVSPGTLTASGVVSGPAAAPAAQHLRQSSFE  
IPDDVPLPAGWEMAKTSSGQRYFLK PMRLRKL PDSFFKPP

tr:A0A087WP32\_MOUSE [A0A087WP32] SubName: Full=Family with sequence  
similarity 181, member A {ECO:0000313|Ensembl:ENSMUSP00000139607}; Flags:  
Fragment; 129..143

MAADSDVKMLLNFNVLASSDIKAALDKSAPCRRSVDHRKYLQKQLKRFSQKYSRLPRGLPGRVAEPHLQ  
RGPEERPGRPPLHPCPQSSPGGGGSCTEKALGTPFREECLSKDQGFRLNPEAARPGQVPMRKRQLPASFWEEP  
PTLSYPMGLEVGLAPR PMRKRQLPASFWEEP

tr:A0A1A8AEC2\_NOTFU [A0A1A8AEC2] SubName: Full=Family with sequence  
similarity 181, member B {ECO:0000313|EMBL:SBP53442.1}; 148..162

MNSQFMSFCFPDSVMEYDVEKSLDGSLCEAENDDDFKETTRDLLSFIDSASSNIKLALDKPVKSKRKY  
NHRKYLQKQIKRCTGIITPGHVAEGPVERQGSPPGMPQGLQSKTTPPKRDEVQASLQSKSLAALFSPAKEVRGEKA  
KKPPLRHRNLPPSFFTEPANCSKVIISTSGMTLKDLEGNPEAAEFFELLGPDYSNMIGDQDLYQGAPLRAQPDIG  
GLDPVSYDAHHLVGGLLYSEPWTS CSGPPKLGESLRTGLAQPPPIYSQSEEASGSIDDSGLSSLAFSNFFTDCSI  
PQVTYDLNCGYSKANYSSP PLRHRNLPPSFFTEP

tr:A0A1A8G386\_9TELE [A0A1A8G386] SubName: Full=Family with sequence  
similarity 181, member A {ECO:0000313|EMBL:SBQ64819.1}; 98..112

MANADSEVKTLNLFVNLASSDIKAALDKSAPCRRSVDHRKYLQKQLKRFSQKYSRVPRCHAHRSADHRC  
LKSPGTAAQETASHEQDVENVGIEVEQVPMRKRQLPASFWEEPRTKAKRDKTGLGLKKS AIGSSDGSKNEMRKA  
ALDDGANASSRRNSADKEVLKLDVTS HHSVSVCGCCPLQYHGHVHLHSHIVVPHPLWSKAAAGTESEHPFGPR  
IHTHVVKPIPTKPTPQSPIFSVFGFI PMRKRQLPASFWEEP

tr:A0A1A8HK71\_9TELE [A0A1A8HK71] SubName: Full=Family with sequence  
similarity 181, member B {ECO:0000313|EMBL:SBQ83826.1}; 155..169

MAVQTAIMNSQFMSFCFPDSVMEYDVEKSLDGSLCEAENDDDFKETTRDLLSFIDSASSNIKLALDKP  
VSKSRKVNHRKYLQKQIKRCTGIITPGNVAEGPVERQGSPPGMPQGLQSKTTPPKRDEVQASLQSKSLAALFSPA  
EIRGEKAKKPPPLRHRNLPPSFFTEPANCSKVIISTSGMTLKDLEGNPEAAEFFELLGPDYSNMIGDQDLYQGAPL  
RAQPDGLGDPVSYDAHHLVGGLLYSEPWTS CSGPSKLGESLRTGLAQPPVYSQSEEASGSIDDSGLSTLAFSN  
FFTDCSIPQVTYDLNCGYSKANYSSP PLRHRNLPPSFFTEP

tr:A0A1A7Z0A9\_9TELE [A0A1A7Z0A9] SubName: Full=Family with sequence  
similarity 181, member A {ECO:0000313|EMBL:SBP36317.1}; 106..120

MKSTTFVNMANADSEVKTLNLFVNLASSDIKAALDKSAPCRRSVDHRKYLQKQLKRFSQKYSRVPRCH  
AHRADYRCLKPPGTAAQEKATAQDVENVGSEVEQVPMRKRQLPASFWEEPRTKAKRDKSYLGLKSTTG PSE  
SENEKRKPLDDGAKASSRRNSADKEVLKLDVTS HHSVSVCGCCPLQYHGHVHLHGHIVVPHQPLGLWSKAATG  
TESEHPFGPRIHTHVVKPIPTKPTPQSPIFSVFGFI PMRKRQLPASFWEEP

tr:A0A1A7X5B1\_9TELE [A0A1A7X5B1] SubName: Full=Yes-associated protein 1  
{ECO:0000313|EMBL:SBP13302.1}; 45..59

MDPSQHNPPVGHQIVHVRGDSETDLETLFNIVMNPNSANIPHSVPMRQRKLPDSFFNPPEPKSHSRQAS  
TDAGSGGVLI PHHVRHSSPASLQLGAVSAGLSGLAPAGASPQHLRQSSYEIPDDVPLPAGWEMAKTSSGQRYF  
LNHIDKTTTWQDPRKPLLQMNQTSPPSSVPVPPQNLNMNPTSGPLPEGWEQAITPEGEIYYINHKNKTTSWLDPRL  
EPRYGLNQQRITQSAPGKQGGPLPPNTHGGVNPMLRQQIEKERLRLKQHEVLRQRPQELALRNQLPTSMEQDGPT  
NPVSSPLAQDARTMTANSSDPFLNSGTYHSRDESTDSGLSMSSYSVPRTPD DFLNSVDEMDTGDQLPPSMATQPN  
RFPDYLDITPGTDVLDLGTLESESMAVEGEELMPSLHEPLSSDILSDMESVLAATKIDKESFLTWL  
PMRQRKLPDSFFNPP

tr:A0A0S7FXX3\_9TELE [A0A0S7FXX3] SubName: Full=YAP1  
{ECO:0000313|EMBL:JAO19315.1}; 45..59

MDAHRGAPPAGQQIVHVRGD SKTELEALFNAVMPKNTANVPQTVPMRKRQLPASFWEEPRTKAKRDKSYLGLKSTTG PSE  
SDGGVCGSLAPHHVRHSSPASLQVNSLSAQADADAAATPIIPDDVPLPEGWEMAKTSTGQRYFINHVHRTTTWQ

DPRLSQLQSAAAQHQIACTPSHAHFSFNPAPTTQPKNIIIPETAPKVNPAILTAMQORLEKLRKQGI PPQFVPQ  
VRENTKLERVVPKISNVILNFCFL PMRMRKFPDSFFKPP

tr:A0A0S7F445\_9TELE [A0A0S7F445] SubName: Full=YAP1  
{ECO:0000313|EMBL:JAO09842.1}; Flags: Fragment;56..70

TSPLVLIWGNMMDPNQLNPPAGHQIVHVRGDSQTDLELLFN SVMNPKTSNVPPSVPMRMRKLPDSFFKPP  
PEPKSHSRQASTDAGSGGVLTPHHVRAHSSPASLQLGAVSGGSLSGMASAGASPQHLRQSSYEIPDDVPLPSGWE  
MAKTSSGQRYFLNHNEKSTTWQDPRKSLQMNQPPPPSSVVPVQPQT LIS PANGSLPEGWEQAITQEGEIYYINHT  
NKTTSWLDPRLPRYALNQRLTQSAPGKQSGQLPSSTHGGVMGNNQLRLQQIEKERLRLQELALRNQLPTSMD  
QDGSTNPVSSPLAQDARTMTVNSSDPFLNSGTYHSRDESTDSGLSMSSYSVPRTPD DFLNSVDEMDTGDPLPASI  
ASQPSRFPDYLD AIPGTDVDLGTLEGESMAVEGEELMASLQEP LSSDILSDMESVLAATKIDKENFLT WL  
PMRMRKLPDSFFKPP

tr:A0A0S7F337\_9TELE [A0A0S7F337] SubName: Full=YAP1  
{ECO:0000313|EMBL:JAO09840.1}; Flags: Fragment;56..70

TSPLVLIWGNMMDPNQLNPPAGHQIVHVRGDSQTDLELLFN SVMNPKTSNVPPSVPMRMRKLPDSFFKPP  
PEPKSHSRQASTDAGSGGVLTPHHVRAHSSPASLQLGAVSGGSLSGMASAGASPQHLRQSSYEIPDDVPLPSGWE  
MAKTSSGQRYFLNHNEKSTTWQDPRKSLQMNQPPPPSSVVPVQPQT LIS PANGSLPEGWEQAITQEGEIYYINHT  
NKTTSWLDPRLPRYALNQRLTQSAPGKQSGQLPSSTHGGVMGNNQLRLQQIEKERLRLQVHRPQELALRNQL  
PTSMDQDGSTNPVSSPLAQDARTMTVNSSDPFLNSGTYHSRDESTDSGLSMSSYSVPRTPD DFLNSVDEMDTGDPL  
LPASIASQPSRFPDYLD AIPGTDVDLGTLEGESMAVEGEELMASLQEP LSSDILSDMESVLAATKIDKENFLT WL  
PMRMRKLPDSFFKPP

tr:A0A0S7FZJ3\_9TELE [A0A0S7FZJ3] SubName: Full=YAP1  
{ECO:0000313|EMBL:JAO19322.1}; 45..59

MDAHRGAPPAGQQIVHVRGDSKTELEALFNAV MNPSKATRQQSVPMRMRKFPDSFFKPPPEPRGHSRQAS  
SDGGVCGSLAPHVRAHSSPASLPVNSLSAQADADAAATPIIPDDVPLPEGWEMAKTSTGQRYFINHVHRTTTWQ  
DPRLSQLQSAAAQHQIACTPSHAHFSFNPAPTTQPKNIIIPETAPKVNPAILTAMQORLEKLRKQGI PPQFVPQ  
VQEAGGSNQMPGGMDHRS AQMLVPSVDIRIRALNQEPNLNGAHSRNESTDSGLSVSSLRTSDHMLSSVDHMDT  
GDSSDPPSMGLQESMPVLPINEDLMPGIPD SLTSDMLMEMDTVLSGPHMDRDSLLTWL PMRMRKFPDSFFKPP

tr:A0A1A8LRE1\_9TELE [A0A1A8LRE1] SubName: Full=Family with sequence  
similarity 181, member B {ECO:0000313|EMBL:SBR47157.1}; 148..162

MNSQFMSFCFPDSVMEYDAEKSLDGSL LCEAENDDDFKETTRD LLSFIDSASSNIKLALDKPVKSKRKV  
NHRKYLQKQIKRCTGIIAPGNVAEGPVERQSGPGMQPGPLQSKTPPKRDEVQASLQSKSLAALFSPAKEVRGEKA  
KKPPLRHRNLPPSFFTEPANCSKVI STSGMTLKD LERGNPEAAEFFELLGPDYSNMIGDQDLYQGAPLRAQPD LG  
GLDPVSYDAHHLVGLLYSEPWTS CSGPSKKLGESLPTGLAQ PPIYSQSEEASGSIDDSGLSTLAFSNFFTDCSI  
PQV TYDLNCGYSKANYSSP PLRHRNLPPSFFTEP

tr:A0A1A8PAY9\_9TELE [A0A1A8PAY9] SubName: Full=Yes-associated protein 1  
{ECO:0000313|EMBL:SBR78413.1};>tr:A0A1A8SGI5\_9TELE [A0A1A8SGI5] SubName:  
Full=Yes-associated protein 1 {ECO:0000313|EMBL:SBS16675.1}; 45..59

MDPSQHNPAGHQIVHVRGDSETDLET LFNIVMNPSSSTNIPHSVPMRQRKLPDSFFNPPPEPKSHSRQAS  
TDAGSGGVLI PHHVRAHSSPASLQLGAVSAGSL SGLAPAGASPQHLRQSSYEIPDDVPLPAGWEMAKTSSGQRYF  
LNHIDKTTTWQDPRKPLLQMNQTSPPSSVVPVQQNLMNPTSGLPEGWEQAITPEGEIYYINHKNKTTSWLDPRL  
EPRYGLNQQRNTQSAPGKQGGPLPTNSHGGVNQMRLQQIEKERLRLKQHDVLRQRPELALRNQLPTSMEQDGPT  
NPVSSPLAQDARTMTANSSDPFLNSGTYHSRDESTDSGLSMSSYSVPRTPD DFLNSVDEMDTGDQLPPSMATQPN  
RFPDYLD AIPGTDVDLGTLESESMAVEGEELMPSLQEP LSSDILSDMESVLAATKIDKESFLT WL  
PMRQRKLPDSFFNPP

tr:A0A1A8NTF5\_9TELE [A0A1A8NTF5] SubName: Full=Family with sequence  
similarity 181, member A {ECO:0000313|EMBL:SBR72002.1};>tr:A0A1A8SN00\_9TELE  
[A0A1A8SN00] SubName: Full=Family with sequence similarity 181, member A  
{ECO:0000313|EMBL:SBS19074.1}; 98..112

MANADSEVK TLLNFVN LASSDIKAALDKSAPCRRSVDHRKYLQKQLKRFSQKYSRVPRCHAHKSADHRC  
LKPPGTAAQETASHAQDVENVGIEVEQVPMRKRQLPASFWEEPRTKAKRDKTGLGLKKS AIGSSDGNKNEMRKA  
ALDDGANASSRRNSADKEVLKLDV TSHHFVSVCGCCPLQYHGHHVLHSHIVVPHPLWSKAAAAGTESEHPFGPK  
IHTHVVKPIPTKPTPQSPIFSVFGFI PMRKRQLPASFWEEP

tr:A0A1A8JU42\_NOTKU [A0A1A8JU42] SubName: Full=Family with sequence  
similarity 181, member B {ECO:0000313|EMBL:SBR23665.1}; 148..162

MNSQFMSFCFPDVSVEYDVEKSLDGSLLCCEAIEDDFKETTDRDLSFIDSASSNIKLALDKPVKSKRKV  
NHRKYLQKQIKRCTSIITPGHVAEGPVERQSGPMQPGPLQSKTTPKRDEVQASLQSKSLAALFSPAKEIRGEKA  
KKPPLRHRNLPPSFFTEPANCSKVISTSGMTLKDLEGRNPEAAEFFELLGPDYSNMIGDQDLYQGAPLRAQPD LG  
GLDPVSYDAHHLVGGLLYSEPWTSCSGPSKKLGEESLRTGLAQPPPIYSQSEEASGSIDDSGLSSLAFSNFFTDCSI  
PQVTYDLNCGYSKANYSSP PLRHRNLPPSFFTEP

tr:A0A1A8JCC2\_NOTKU [A0A1A8JCC2] SubName: Full=Family with sequence  
similarity 181, member A {ECO:0000313|EMBL:SBR07473.1}; 98..112

MANADSEVKTLNLFVNLAASDIKAAALDKSAPCRRSVDHRKYLQKQLKRFSQKYSRVPRCHAHRSADHRC  
LKPPGTAAQETASHAQDVENVGIEVEQVPMRKRQLPASFWEEPQTKAKRDKTGLGLKKS AIGSSDGSKNEMRKA  
ALDDGANASSRRNSADKEVLKLDVTSHHFVSVGCCPLQYHGHVHLSHIVVPHPLWSKAAAGTESEHPFGPR  
IHTHVVKPIPTKPTQSPIFS VFGFI PMRKRQLPASFWEEP

tr:A0A1A8QZZ7\_9TELE [A0A1A8QZZ7] SubName: Full=Family with sequence  
similarity 181, member B {ECO:0000313|EMBL:SBR98783.1}; 148..162

MNSQFMSFCFPDVSMEYDVEKSLDGSLLCCEAENDDDFKETTDRDLSFIDSASSNIKLALDKPVKSKRKV  
NHRKYLQKQIKRCTGI IAPGNVAEGPVERQSGPMQPGPLQSKTTPKRDEVQASLQSKSLAALFSPAKEVRGEKA  
KKPPLRHRNLPPSFFTEPANSSKVISTSGMTLKDLEGRNPEAAEFFELLGPDYSNMIGDQDLYQGAPLRAQPD LG  
GLDPVSYDAHHLVGGLLYSEPWTSCSGPSKKLGEESLRTGLAQPPPIYSQSEEASGSIDDSGLSTLAFSNFFTDCSI  
PQVTYDLNCGYSKANYSSP PLRHRNLPPSFFTEP

tr:H0ZR92\_TAEGU [H0ZR92] SubName: Full=Uncharacterized protein  
{ECO:0000313|Ensembl:ENSTGUP00000013135}; 38..52

PPAGHQIVHVRGDSETDLEALFNAVMPKGANVPHTLPMRLRKL PDSFFKPPPEPKAHSRQASTDAGTAG  
ALTPQHVAHSSPASLQLGAVSPGTLTPSGVVTGPGAPSSQHLRQSSFEIPDDVPLPPGWEMAKTPSGQRYFLNH  
IDQTTTTWQDPRKAMLSQMNVTAPTSPSVQONIMNSASGPLPDGWEQAMTQDGEIYYINHKNKTTSWLDPRLDPRF  
AMNQRISSAPVKQPPPLAPQSPQGGVMGGSSSNQQQQMRLQQLQMEKERLR LKHQELLRQALRNINPSTANS PK  
PMRLRKL PDSFFKPP

tr:H0Z1D1\_TAEGU [H0Z1D1] SubName: Full=Uncharacterized protein  
{ECO:0000313|Ensembl:ENSTGUP00000004369}; 58..72

SPRSAEAVPEASRGSPGAHRLGPLAELFEYGVHRCLPARAAGGKTQRLERKYGHITPMHRRKLPPSFW  
KEPGPGPASLLHTGTPDFSDLLANWTVEPGPELPGRPGLEAEFFAG PMHRRKLPPSFWKEP

tr:A0A1A7Y3K7\_9TELE [A0A1A7Y3K7] SubName: Full=Family with sequence  
similarity 181, member B {ECO:0000313|EMBL:SBP24868.1}; 148..162

MNSQFMSFCFPDVSMEYDVEKSLDGSLLCCEAENDDDFKETTDRDLSFIDSASSNIKLALDKPVKSKRKV  
NHRKYLQKQIKRCTGI IITPGNVTGDPVKRQGFPGTQPGPLQSKTLPKRQGVQASLQSKSLAALFSPVKEIRGEKA  
KKPPLRHRNLPPSFFTEPANCSKVSSTSGMTLKDLEGRNPEAAEFFELLGPDYSNMISDQDLYQGAPLRAQPD LG  
GLDPISYDTHHLVGGLLYSEPWTSCSGPSKKLGEESLRTGLAQPPVYSQSEEASGPIDDIGLSTLAFSNFFTDCSI  
PQVTYDLNCGYNKNTNYSSL PLRHRNLPPSFFTEP

tr:A0A1A7XQJ1\_9TELE [A0A1A7XQJ1] SubName: Full=Family with sequence  
similarity 181, member B {ECO:0000313|EMBL:SBP20372.1}; 148..162

MNSQFMSFCFPDVSMEYDVEKSLDGSLLCCEAENDDDFKETTDRDLSFIDSASSNIKLALDKPVKSKRKV  
NHRKYLQKQIKRCTGI IITPGNVTGDPVKRQGFPGTQPGPLQSKTLPKRQGVQASLQSKSLAALFSPVKEIRGEKA  
KKPPLRHRNLPPSFFTEPANCSKVSSTSGMTLKDLEGRNPEAAEFFELLGPDYSNMISDQDLYQGAPLRAQPD LG  
GLDPISYDTHHLVGGLLYSEPWTSCSGPSKKLGEESLRTGLAQPPVYSQSEEASGPIDDSGLSTLAFSNFFTDCSI  
PQVTYDLNCGYNKNTNYSSL PLRHRNLPPSFFTEP

tr:A0A3P8SX74\_AMPPE [A0A3P8SX74] SubName: Full=Family with sequence  
similarity 181 member B {ECO:0000313|Ensembl:ENSAPEP00000016920};  
155..169

MAVQTAIMNPQFMNFCFPGSVMEYDVEKSLDGSLLGAEENDEYKETTDRDLSFIDSASSNIKLALDKP  
VSKRKVNHRKYLQKQIKRCTGI IITPGNVAEAPVKRQGSPLTQPSPLQSKTLPKRQGVQANLQSKSLAALFSPVK  
DIRGEKAKKPLRHRNLPPSFFTEPANCSKVSSTSGMSLKDLEGRNPEAADFFELLGPDYSNMVSDQDLYQGMFP

RVQPELGGPDPASYDAHHLVGGLLYSEPWTSCSGPSKKLGETLRTGPAQPPAYCHSEAASGPIEDNALCTLAFPN  
FFTDCAIPQVTYDLSGGSFNILTWRQISSW PLRHRNLPPSFFTEP

tr:A0A1A8V5Z3\_NOTFU [A0A1A8V5Z3] SubName: Full=Uncharacterized protein  
{ECO:0000313|EMBL:SBS55226.1}; 47..61

MDAHRGGAPPAGQQVVHVRGDSKTELEALFSAVMDPGKASRQPQSLPMRMRKLPDSFFKPPPEPRGHSRQ  
ASSDGGVCGSLAPHHVRAHSSPASLPVNSLTAQADADVAATPIIPDDVPLPDGWELAKTLTGQRYFINHLEKTTT  
WLDPRLSQLQSAAAQHPISCAPIHTHSFSNPAPTTQAQHIHPETAQKMNPAIILGLAMQQRQEKERLRCKQGLPPQ  
ITPQDAAGRNIQIPRGMHDHRSQMLVPSVDARIRALNQEPTLNGAHSRNESTDSGLSVSSLPRTSDHLLSSVDHM  
DTGDSSEPSSVTMQETMPVLPITEGEEMLMPCIPDGLNSDLLMDMETVLSGPHMDRDSLLTTL  
PMRMRKLPDSFFKPP

tr:S4RVF5\_PETMA [S4RVF5] SubName: Full=Uncharacterized protein  
{ECO:0000313|Ensembl:ENSPMAP00000009195}; 52..66

KTPTKSLQPMELGGDHQLGPMGQVVLHVRGDSETDLETFLFNTVMNPQGGALPWRYRKLPPSFFREPDSG  
SHSRQSSADSTSPCGIVPQHSRSHSSPANLQQIQGGLGGFGPLQLSCSELQQATLAVAEPPLPPGWVATTPSGQ  
RYII PWRYRKLPPSFFREP

tr:A0A091QPY5\_9GRUI [A0A091QPY5] SubName: Full=Uncharacterized protein  
{ECO:0000313|EMBL:KFQ29233.1}; Flags: Fragment; 56..70

SPQHTAEAEAPCASPRGIHRLGPLAGLFEYGVHRCLSPQAAGGKTQQLERKYGHITPMHRRKLPSSFRE  
PGPSPAGLLHTGIPDFSDLLANWTVEPGLDAGRELPPELGRPGLESEPFAG PMHRRKLPSSFRE

tr:A0A3B4C0E7\_PYGNA [A0A3B4C0E7] SubName: Full=Family with sequence  
similarity 181 member B {ECO:0000313|Ensembl:ENSPNAP00000004365};  
156..170

MAVQAAIMNSQFLNFCFPGSVMEYEVEKGLDGSLLGEADCEDDFRETTRDLSFIDSASSNIKLALDKP  
VSKSRKVNHRKYLQKQIKRCTGIIASGNAATQEPCKGQDSPAAPTSTLQSKTPTKRKDGSAQLNSKSLAALFNPA  
KDLRGERAKKPLRHRNLPPSFFTEPANSSRVTSTSGMSLKDLEGRNPDAAEFFELLGPDYSNMVSEQELFQSTP  
IRVQQEGTGGPEPGSFDSSHFPVTGGFLYAEPWDTSSNVAKKTGDMRTVPGQPHLYGNTDSSGPVQVEQSSPCALT  
FPNFFTDSCSVSQVSYDLASGYSRALLKKKRTAWPAQPG PLRHRNLPPSFFTEP

tr:A0A2G9QIE7\_LITCT [A0A2G9QIE7] SubName: Full=Uncharacterized protein  
{ECO:0000313|EMBL:PIO15402.1}; 115..129

MASDNEVKTLNLFVNLASCDIKAALDKSAPCRRSVDHRKYLQKQKRFSSQKYSRLPRCHSSKNVDLRKG  
LVERINLATHSKGLSEKVMATLDENTDGNACSRIGAEGEKPDQVPMRKRQLPPSFWEEPSTSLLEMSCPSKL  
DLLYKERTSVTGTLLSFDNKKLKNVVIQETSSPSCLEKEAGKVPSVTPLAGRVNVCSCCPLQYHGQMLYHHSH  
HGTLPDPFAALALWSKSTTIPTVEIQHLCKDSGQRIYRHVVFKPIPTKPAMPASIFNVFGYI  
PMRKRQLPPSFWEEP

tr:A0A091EZ7\_CORBR [A0A091EZ7] SubName: Full=Uncharacterized protein  
{ECO:0000313|EMBL:KFO63283.1}; Flags: Fragment; 60..74

SPQSTEAPEAVVPRRSPGATHMLGPLAELFEYGVHRCLPARVAGSKTQRLERKYGHITPMHRRKLPSS  
FWKEPGPGPASLLHAGTPDFSDLLANWTVEPPELPGTGRELPGRLGLEAEPFAG PMHRRKLPSSFWEK

tr:A4IGV8\_XENTR [A4IGV8] SubName: Full=LOC100038276 protein  
{ECO:0000313|EMBL:AAI35265.1}; Flags: Fragment;>gp:BC135264\_1 [BC135264]  
LOC100038276 protein [Xenopus tropicalis] 144..158

CTLAGWIILSNGIACIDFVWKSVFLNIMASDSEVKTLNLFVNLASCDIKAALDKSAPCRRSVDHRKYLQ  
KQLKRFSQKYSRLPRCTPSKSVDLRKGLLDQRNNTSLNGLSEKAMHALETEESI IKDTFTQENSSEAGRDPQVP  
MRKRHLPASFWEEP RPSSSLELHCPSPDPDKFESTDTLLPLYETKRGKNLAIHESHSSSSSFYPSEDKESGKLP  
VASLTELVNACSCCPFYHGQAMYQHYPGELSSNPFTALALWSKSTVPTLELQHLCKESGQRIYRHVVLPKIP  
PAVHSSLFNVFGYI PMRKRHLPASFWEEP

tr:F6YXE9\_XENTR [F6YXE9] SubName: Full=Family with sequence similarity  
181 member A {ECO:0000313|Ensembl:ENSXETP00000058802}; 144..158

CTLAGWIILSNGIACIDFVWKSVFLNIMASDSEVKTLNLFVNLASCDIKAALDKSAPCRRSVDHRKYLQ  
KQLKRFSQKYSRLPRCTPSKSVDLRKGLLDQRNNTSLNGLSEKSMHALETEESI IKDTFTQENSSEAGRDPQVP  
MRKRHLPASFWEEP RPSSSLELHCPSPDPDKFESTDTLLPLYETKRGKNLAIHESHSSSSSFYPSEDKESGKLP

VASLTTELVNACSCCPFYHGQAMYQHYPGELSSNPFTALALWSKSTVPTLELQHLCKESGQRIYRHVVVKPIPTK  
PAVHSSLFNVFGYI PMRKRHLPASFWEEP

tr:A0A2P4T9W7\_BAMTH [A0A2P4T9W7] SubName: Full=Uncharacterized protein  
{ECO:0000313|EMBL:POI33134.1}; 127..141

MASDSEVKTLNLFVNLASSDIKAALDKSAPCRRSVDHRKYLQKQLKRFSQKYSRVPRCHPTKTPECGPR  
RGAEDRARSCQPDVDPDPGPHNGAATEKVLQAAEAESLKRQAVPEQNPETNRPDQVPMRKRQLPASFWEEP  
QSLPARGFPPGPEGLPVPRDPPPFEGKSKRSQDTIGPESHEPSLNAGEKDPTGVLAGRVGAWTCCPFPCPGPAV  
YQPPGTLPPSPFPGLGLWRKGNATLPAAEQPFCKDAEGTGQKLYRPVVKPIPTKTPIPPPIFNVFGYL  
PMRKRQLPASFWEEP

tr:A0A2P4SF16\_BAMTH [A0A2P4SF16] SubName: Full=Uncharacterized protein  
{ECO:0000313|EMBL:POI22702.1}; 166..180

MAVPAALLSPHLLSFCFPAGGLLGYADLEKGYEGGGGGGGGGGGCEAGDFKEATRDLDSFIDSASSN  
IKLALDKPVKSKRKNHRKYLQKQIKRCTGIIAPPPAAPPSSACPKPPPPRREGSQAGSSLQSRSLAALFGSLQ  
PGRGSAGSDGGAAGGGPRKVPDRNLPPSFFTEPGAKETEKGGGPEAAEFFELLGPEYGALLPEHAAPPQDAF  
PAARPPAELGLEHGLYEAAPLPAAPHLLGGLLYPEPPWSPGPCSPAKKAPPEPLRPLYPEPAAGGDAFGPFPF  
ECPLPPPQMPYDYGGFHRAAYTGL PLRDRNLPPSFFTEP

tr:A0A2P4SIM1\_BAMTH [A0A2P4SIM1] SubName: Full=Uncharacterized protein  
{ECO:0000313|EMBL:POI23956.1}; 202..216

MHGRAAAPRVSPGGLSLCTDMAAGVIQPLAKLRLPSPFPHGLLLPARPEPDFDLSEEDDEEEEEEEED  
EEEEAEESAGCSGPEPAGPNAEATLRLRFLSELISCDIQRYFGQRGEEAAGGHGMPEDCSSPRSSPRDASLGH  
MARGGRAQPEAALGGHGAHRLGPLAELFEYGVHRCLAPRVVSGKTQRLERKYGHITPMHRRKLPPSFWREP  
PGSLHAGTPDFSDLLAHWTVEPGPELPGSGRELPPVLGHAGLEAEPYGG L PMHRRKLPPSFWREP

tr:H2LC86\_ORYLA [H2LC86] SubName: Full=Family with sequence similarity  
181 member B {ECO:0000313|Ensembl:ENSORLP00000003522}; 155..169

MAVQTAIMNPQFMSFCFPGSVMEFDFVEKSLDGSLLCEAEQDEDFKETTDRDLSFIDSASSNIKLALDKP  
VSKRKNHRKYLQKQIKRCTGIIITPGNGAETPVKRQSSPVSQQSSLQNKVLPKRDGVQANLQSKSLAALFSPVK  
ELRGERAKKPLRHRNLPPSFFTEPANCSKVSPTSEVTLKDLERGSDFEFELLGPDYSSMVSQDLYPSVPLRMQ  
SELGGLDPASYDAHVVAAHLYTADPWTSCSGPSKKLGENPRAGPVQPPAYFQSEEASGGMDDNALCTLAFFNFFP  
DCSLPQVITYDLNSGYNRSKRERGGGGYKC PLRHRNLPPSFFTEP

tr:A0A3P9L0R8\_ORYLA [A0A3P9L0R8] SubName: Full=Family with sequence  
similarity 181 member B {ECO:0000313|Ensembl:ENSORLP00020014325};  
155..169

MAVQTAIMNPQFMSFCFPGSVMEFDFVEKSLDGSLLCEAEQDEDFKETTDRDLSFIDSASSNIKLALDKP  
VSKRKNHRKYLQKQIKRCTGIIITPGNGAETPVKRQSSPVSQQSSLQNKVLPKRDGAQANLQSKSLAALFSPVK  
DIRGERAKKPLRHRNLPPSFFTEPANCSKVSPTSEVTFKDLERGSDFEFELLGPDYSSMVSQELYPSVPLRMQ  
SELGVLDPASYDAHVVAAHLYTADPWTSCSGPSKKLGENPRAGPVQPPAYFQSEEASGGMDDNALCTLAFFNFFP  
DCSLPQVITYDLNSGYNRSMFVVLWEDAF PLRHRNLPPSFFTEP

tr:A0A3P9IJ23\_ORYLA [A0A3P9IJ23] SubName: Full=Family with sequence  
similarity 181 member B {ECO:0000313|Ensembl:ENSORLP00015019934};  
155..169

MAVQTAIMNPQFMSFCFPGSVMEFDFVEKSLDGSLLCEAEQDEDFKETTDRDLSFIDSASSNIKLALDKP  
VSKRKNHRKYLQKQIKRCTGIIITPGNGAETPVKRQTSPPVSQQSSLQNKVLPKRDGVQANLQSKSLAALFSPVK  
EIRGERAKKPLRHRNLPPSFFTEPANCSKVSPTSEVTLKDLERGSDFEFELLGPDYSSMVSQDLYPSVPLRMQ  
SELGGLDPASYDAHVVAAHLYAADPWTSCSGPSKKLGENPRAGPVQPPTYFQSEEASGGMDDNALCTLAFFNFFP  
DCSLPQVITYDLNSGYNRSGARQGPAAPEEGSTPGRKGAHQGCC PLRHRNLPPSFFTEP

tr:A0A3P9I183\_ORYLA [A0A3P9I183] SubName: Full=Uncharacterized protein  
{ECO:0000313|Ensembl:ENSORLP00015013735}; 42..56

MDAHRSGRQVVHVRGDSQKELEALFSRVMPNSEASRQPSVPMRMRKLPDSFFKPPEPRGHSRQASSDG  
GVCGLTTPHHSRTVSAPAALPVNSLSTQAADVAATSIIPDDVPLPPGWEMAKTPTGQRYFLNHLDKTTTWLDPRL  
SQLQSAQHPIANAPVHSHSFSNPAPTTQAQSVNPESGLPEGWQAVTPEGEMYIDHINKTTTWVDPRLGPPPQ  
VTQQVRGQINQAAAPKRTDSRTFWVACMAVDHMKNQMSAGLDHDRSGQVLVPSVDARIRHFNI IAHSRNESTDS

GLSVSSLPRTNDHMLSVPDHMDTGNALKHTKLFPLNAVPVELGPMPLPMSEGEELMPCIEPEGLSSDLLMDMETVL  
SGSHMDRDNLLTLWL PMRMRKLPDSFFKPP

tr:A0A3P9L293\_ORYLA [A0A3P9L293] SubName: Full=Yes-associated protein 1  
{ECO:0000313|Ensembl:ENSORLP00020014834}; 45..59

MDPSQHNPPVGHQIVHVRGDSETDLEALFNAVMPKNAVPPQSVPMRMRKLPDSFFKPPPEPKSHSRQAS  
TDAGSGGVLTPHHVRAHSSPASLQLGAVSGGSLSGMASAGASPOHLRQSSYEIPDDVPLPPGWEMAKTSSGQRYF  
LNHIDQTTTWQDPRKALLQLNQATPPSTVPVQQQNLSPASGPLEGWEQAITPEGEIYYINHKNKTTSWLDPRL  
ETRYALNQQRITQSAPVKQGGPLPPNPHGGVMGGNNQMRLQOMEKERIRLQKQELLRQSRPQVLDEFALRNQL  
PTSMDQDGSSNPVSSPMAQDARTMTANSNDPFLNSGTYHSRDESTDSGLSMSSYSVPRTPDDFLNSVDEMDTGDP  
LAPSMATQPSRFPDYLDITPGTDVDLGTLEGESMAVEGEELMPSLQEQALSSDILNDMESVLAATKIDKESFLTWL  
PMRMRKLPDSFFKPP

tr:W5L798\_ASTMX [W5L798] SubName: Full=Yes-associated protein 1  
{ECO:0000313|Ensembl:ENSAMXP00000015710}; 45..59

MDPGQHNPAGHQIVHVRGDSETDLEALFNAVMPKNAVPPSVPMRMRKLPDSFFKPPPEPKSHSRQAS  
TDAGTAGTLTPQHVRHSSPASLQLGAVSPGTLTGLPQPGTSPQHLRQPSYEIPDDVPLPPGWEMAKTASGQRYF  
LKKAMLQMNQPPPGSPVPVQQQNLNPASGPLPDGWEQAITSEGEIYYINHKNKTTSWLDPRLDPRFALNQQRIS  
QSAPVKPGPPLPSSPPNAGVIGGSCQMRLQQLQOMEKERLRKQELLRRPQELALRNQLPTSMEQDGGTQNPVSS  
PGMGQDARSMTTNSDPFLNSGTYHSRDESTDSGLSMSSYSVPRTPDDFLNSVDEMETSDSLVPASMATQPRGFP  
DYLDIAIPGTDVDLGTLEGESMAVEGEELMPSLQEQALSSDILNDMESVLAATKIDKESFLTWL  
PMRMRKLPDSFFKPP

tr:A0A3B1JDI6\_ASTMX [A0A3B1JDI6] SubName: Full=Yes-associated protein 1  
{ECO:0000313|Ensembl:ENSAMXP00000040328}; 45..59

MDPGQHNPAGHQIVHVRGDSETDLEALFNAVMPKNAVPPSVPMRMRKLPDSFFKPPPEPKSHSRQAS  
TDAGTAGTLTPQHVRHSSPASLQLGAVSPGTLTGLPQPGTSPQHLRQPSYEIPDDVPLPPGWEMAKTASGQRYF  
LNHIDQSTTCPVPVQQQNLNPASGPLPDGWEQAITSEGEIYYINHKNKTTSWLDPRLDPRFALNQQRISQSAPV  
KPGPPLPSSPPNAGVIGGSCQMRLQQLQOMEKERLRKQELLRRPQELALRNQLPTSMEQDGGTQNPVSSPGMGQ  
DARSMTTNSDPFLNSGTYHSRDESTDSGLSMSSYSVPRTPDDFLNSVDEMETSDSLVPASMATQPRGFPDYLDIA  
IPGTDVDLGTLEGESMAVEGEELMPSLQEQALSSDILNDMESVLAATKIDKESFLTWL PMRMRKLPDSFFKPP

tr:W5LT58\_ASTMX [W5LT58] SubName: Full=Family with sequence similarity  
181 member B {ECO:0000313|Ensembl:ENSAMXP00000026269}; 156..170

MAVQAAIMNSQFLNFCFPGSVMEYEVEKGLDGGLGEADCERDFRETTRDLLSFIDSASSNIKLALDKP  
VKSKRNVNHRKYLQKQIKRCTGIISSGTAATQEPCKRQDSPQTPTSTLQSKTPPKRGAQANLQSKSLAALFNPA  
KDLRGERAKKPLRHRNLPPSFFTEPANCSRVTSTSGMSLKDRLRGNPDAAEFFELLGPDYSNMVTEQELFHTTT  
PVRVQOEGTGGPEPGAFFDHFVTGGFLYAEPWGTGSGASKKTGDMRTVPGQPPLYGSTDSSGPAPAEQSSPCSSL  
TFPNFFTDPCVSVQSYDLASGYTRGNKDDNGVSLDTAMVPPRECLALVKGHTIPLRHRNLPPSFFTEP

tr:A0A2U9B3Z1\_SCOMX [A0A2U9B3Z1] SubName: Full=Putative transcriptional  
coactivator YAP1 {ECO:0000313|EMBL:AWO98672.1};>gp:CP026245\_269 [CP026245]  
putative transcriptional coactivator YAP1 [Scophthalmus maximus] 45..59

MDPSQPNPPAGHQIVHVRGDSETDLEALFNAVMPKNTIVPPSVPMRMRKLPDSFFKPPPEPKSHSRQAS  
TDAGSGVALTPHHVRAHSSPASLQLGAVSGGSLSGMVPAGSPSHLRQSSYEIPDDVPLPPGWEMAKTSSGQRYFL  
NHIDQTTTWQDPRKALLQMNQAAPANSVPVQQQNLNMPSTSGSLPDGWEQAITSEGEIYYINHKNKTTSWLDPRLD  
QRYALNPQRITQSAPVKQGGQLPPSAHTGVLGGNNQMRLQOIEKERLRKQELLRQRQELALRNQLPMDQDGS  
TNPVSSPMAQDARTMTANSNDPFLNSGTYHSRDESTDSGLSMSSYSVPRTPDDFLNSVDEMDTGDPPLPSSMATQP  
SRFPDYLDIAIPGTDVDLGTLEGESMVVEGEELMPSLQEQALSSDILNDMESVLAATKIDKESFLTWL  
PMRMRKLPDSFFKPP

tr:A0A091T886\_PHALP [A0A091T886] SubName: Full=Protein **FAM181A**  
{ECO:0000313|EMBL:KFQ70649.1}; Flags: Fragment; 6..20

RPDQVPMRKRQLPASFWEEPRPAQSLPTRAFFPTGPEGLPAPRDPPPYEKGKSKRSSDTAGPESPPESAP  
HTGDKDSTGVLSGQVGSWTCCFPFCPGPGVYQPPGALPPSPFPGLGLWRKSTAALPAEVPHFCKEADSTGQKLYR  
PVVLKPIPTKPAVPPPIFNVFGYL PMRKRQLPASFWEEP

tr:A0A2U9B4K8\_SCOMX [A0A2U9B4K8] SubName: Full=Uncharacterized protein  
{ECO:0000313|EMBL:AWO98678.1};>gp:CP026245\_275 [CP026245] putative protein



**FAM181B** [Scophthalmus maximus] 155..169

MAVQTAIMNPQFMNFCFPGSVMEYDVEKSLDGSLLGEAENDEYKETTTRDLLSFIDTASSNIKLALDKP  
VKSKRKNVHRKYLQKQIKRCTGIITPGNGAEAPVKRQSGPMAQPSPLQNKTLPKRDGLQANLQSKSLAALFSPVK  
EVRGEKAKKPLRHRNLPPSFFTEPANCSKVSSTSGMSLKDLERGNPEAAEFFELLGPDYSNMVSDQDLYQSVPL  
RVQPELGGPDPASYDTHHLVGGLLYSEPWTSCSGPSKPKGDSLRTGPAQPPVYQSEAAAGPVEDNALCTLAFPN  
FFTDCSLPQVTTYDLGGGYNRANYSSL PLRHRNLPPSFFTEP

tr:A0A2U9CK07\_SCOMX [A0A2U9CK07] SubName: Full=**FAM181** domain containing protein {ECO:0000313|EMBL:AWP16523.1};>gp:CP026259\_639 [CP026259] **FAM181** domain containing protein [Scophthalmus maximus] 152..166

MSMFDALCACENTQWSNVPMSRNLGDGEAGALTWTDSKVLAKKQKTKKMANADSEVKTLNLFVNLASSDI  
KAALDKSAPCRRSVDHRKYLQKQLKRFSQRYSRGPRCHTHRPEYGRGRPGGAARQGPDAEQAGGSEARGGDDDD  
GSAVEQVPMRKRLLPASFWEEPKLTPAKRERTHLGLKRGSSAGAPEGGDNDKRKRSCGDDAKAALSAAGRSSAD  
REALKVDLSSHCVSVCGCCPFQYHGHQGLHSHIVVPHAMALWGEAAGAEAEAGPEHPYQKIHITHVVVKPIPTK  
PAVQSPIFSVFGFI PMRKRLLPASFWEEP

tr:A0A1A8IR53\_NOTKU [A0A1A8IR53] SubName: Full=Uncharacterized protein {ECO:0000313|EMBL:SBQ99822.1}; Flags: Fragment; 32..46

VHVRGDSKTELEALFSAVMDPGKASRQPQSLPMRMRKLPDSFFKPPPEPRGHSRQASSDGGVCGSLAPHH  
VRAHSSPASLPVNSLTAQADADVAATPIIPDDVPLPDGWELAKTLTGQRYFINHLEKTTTWLDPRLSOLQSAQAQ  
HPISCAPIHHTSFSNPAPTTQAQHIHPETAQKMNPAIILGLAMQQRQEKERLRCKQGLPQPQITPDAAAGRNQMPRG  
MDHDRSTQMLVPSVDARIRALNQEPTLNGAHSRNESTDSGLSVSSLPRTSDHMLCSV PMRMRKLPDSFFKPP

tr:A0A1A8JKU0\_NOTKU [A0A1A8JKU0] SubName: Full=Yes-associated protein 1 {ECO:0000313|EMBL:SBR09786.1}; 45..59

MDPSQHNPAGHQIVHVRGDSETDLETFLNIVMNPSSANIPHSVPMRQRKLPDSFFNPPEPKSHSRQAS  
TDAGSGGVLIIPHVRAHSSPASLQLGAVSAGSLSGLAPAGASPQHLRQSSYEIPDDVPLPAGWEMAKTSSGQRYF  
LNHIDKTTTWQDPRKPLLQMNQTSPPSSVVPVQQLNLMNPTSGPLPEGWEQAITPEGEIYYINHKNKTTSWLDPRL  
EPRYGLNQQRNTQSAPGKQGGPLPTNSHGGVNMRLQOIEKERLRKQHEVLRQRPQELALRNQLPTSMEQDGP  
NPVSSPLAQDARTMTANSSDPFLNSGTYHSRDESTDSGLSMSSYSVPRTPDDFLNSVDESDTDSGLSMSSYSVPRT  
PDDFLNSVDEMDTGDQLPPSMATQPNRFPDYLDLAI PGTDVDLGTLESESMAVEGEELMPSLQEPSSDILSDMES  
VLAATKIDKESFLTWL PMRQRKLPDSFFNPP

tr:A0A1A8JN51\_NOTKU [A0A1A8JN51] SubName: Full=Yes-associated protein 1 {ECO:0000313|EMBL:SBR21534.1};>tr:A0A1A8CUN3\_9TELE [A0A1A8CUN3] SubName: Full=Yes-associated protein 1 {ECO:0000313|EMBL:SBP82406.1}; 45..59

MDPSQHNPAGHQIVHVRGDSETDLETFLNIVMNPSSANIPHSVPMRQRKLPDSFFNPPEPKSHSRQAS  
TDAGSGGVLIIPHVRAHSSPASLQLGAVSAGSLSGLAPAGASPQHLRQSSYEIPDDVPLPAGWEMAKTSSGQRYF  
LNHIDKTTTWQDPRKPLLQMNQTSPPSSVVPVQQLNLMNPTSGPLPEGWEQAITPEGEIYYINHKNKTTSWLDPRL  
EPRYGLNQQRNTQSAPGKQGGPLPTNSHGGVNMRLQOIEKERLRKQHEVLRQRPQELALRNQLPTSMEQDGP  
NPVSSPLAQDARTMTANSSDPFLNSGTYHSRDESTDSGLSMSSYSVPRTPDDFLNSVDEMDTGDQLPPSMATQPN  
RFPDYLDLAI PGTDVDLGTLESESMAVEGEELMPSLQEPSSDILSDMESVLAATKIDKESFLTWL  
PMRQRKLPDSFFNPP

tr:A0A091MVH1\_APAVI [A0A091MVH1] SubName: Full=Protein **FAM181A** {ECO:0000313|EMBL:KFP81473.1}; 127..141

MASDSEVKTLNLFVNLASSDIKAALDKSAPCRRSVDHRKYLQKQLKRFSQKYSRI PRCHPSKPSECGWR  
RGPEDQGRGPQPEAPDPSPHGGATAEKVLLTAEVEESLAGERVLQEQNPEATRDPQVPMRKRQLPASFWEEP  
QSLPARVFPASPEGLPAPRDPHPHEGKSKRSLDSAGPESPEPAPHTGEKDPAGVFSGRVGAWTCPPFSCPGP  
VYQPPGALPPSPFPLGLWRKSGAKLPAEVPQPVVLKPIPTKPAIPPIIFNVFSYL PMRKRQLPASFWEEP

tr:A0A315VJ38\_GAMAF [A0A315VJ38] SubName: Full=Uncharacterized protein {ECO:0000313|EMBL:PWA23163.1}; 46..60

MDAHRGAPPAGQVHVVRGDSKTELEALFNAVMPNSKAARQPPSVPMRMRKFPDSFFKPPQPRGHSRQA  
SSDGGVCGSLAPHHVRAHSSPASLPVNSLSAQADADADAAATPIIPDDVPLPDGWEMAKTPTGQRYFINHVHRTT  
TWQDPRLAQLQSAQAQHQIACPTPSHAHSFSNPAPTTQPKNIITETGPLPEGWEQAVTAEGEMYYIDHINQATTWD  
DPRLAPKVNPAIHSLAMQQRLEKLRKQGVLPQFAPQFDEIKHTRI QVQEAGGSNQMPGGMDHRSQMLVPSVD  
IRIRALNQEPNLNGAHSRNESTDSGLSVSSLSRTSDHMLSSVDHMDTGDSSSEPPSMGLQESMPVLPINEDLMPGI  
PDSLTTDMLMEMDTVLSGPHMDRDSLLTTLW PMRMRKFPDSFFKPP

tr:A0A099ZW71\_CHAVO [A0A099ZW71] SubName: Full=Protein **FAM181A**  
{ECO:0000313|EMBL:KGL86061.1}; Flags: Fragment;127..141  
MASDSEVKTLNLFVNLASSDIKAALDKSAPCRRSVDHRKYLQKQLKRFSQKYSRIPRCHPGKPPESGWR  
RVAEDRGRVQPPELDPSPHGGAAATEKVLRTTEAEESLAGERVLQEQNPEASRPDQVPMRKRQLPASFWEEP  
RPAQSLPTRAFFPPGLEGLPAPRDPPIYEGKSKRSDTTGPESPPDAAPHGREKDPTGVLSSGRVGAWTCCPFPCPGP  
VYQPPGALPPSPFPLRLWRKRAS PMRKRQLPASFWEEP

tr:A0A0Q3MCH6\_AMAAE [A0A0Q3MCH6] SubName: Full=Yorkie isoform X1  
{ECO:0000313|EMBL:KQK80359.1}; 84..98  
MDPGQTOQQQPPQASQPPASQAPPQPPGAVSGAPSGAAQPPGAAPPPAGHQIVHVRGDSETDLEALFN  
AVMNPKGANVPHTLPMRLRKLKLPDSFFKPPPEPKAHSRQASTDAGTAGALTPQHVRHSSPASLQLGAVSPGTLTPS  
GVVTGPGAPASQHLRQSSFEIPDDVPLPPGWEMAKTPSGQRYFLNHIDQTTTWDPRKAMLSQMNVTAPTS  
QONIMNSASAMNQRISQSAPVKQPPPLAPQSPQGGVMGGSSSNQQQMRLQQLQMEKERLRLKHQELLRQELALRS  
QLPTMEQDGGSNPVS SPGMSQELRTMTTNSSDPFLNSGTYHSRDESTDSGLSMSSYSVPRTPDDFLNSVDEMDT  
GDSISQSNIPSHQNRFPDYLEAIPGTNVDLGTLEGDGMNIEGELMPSLQEQALSSDILNDMESVLAATKLDKESF  
LTWL PMRLRKLKLPDSFFKPP

tr:A0A0Q3PKI1\_AMAAE [A0A0Q3PKI1] SubName: Full=Uncharacterized protein  
{ECO:0000313|EMBL:KQK76684.1}; 178..192  
MAVPAALLSPHLLSFCFPAAGLLGYADLEKGYEGGGDAAGDFKEATRDLLSFIDSASSNIKLALDKP  
VKSKRKNVHRKYLQKQIKRCTGIIAAAPPPPPAPPAPSASSPPASCPAKPPPRREGSOGASSLQSKSLAALFGSL  
QHGGPGAGGGEVAGGGGGATGGGGAAGGGPRKVLDRNLPPSFFTEPALPAAARGPVPGAKEPEKGGGDAVEFF  
ELGPEYSALLPEHGAPQDAFPGGAAARLPAELALEHGLYDAALPLPSAHHPLLGGLLYEPWSPPGPCSPGKKA  
PSEALRPLYPGGGEPAASGGSEEPGGHLPAFGASFFPECLPPPQVPYEYSAGFPRAAFP  
PLDRNLPPSFFTEP

tr:A0A1A8C8U4\_9TELE [A0A1A8C8U4] SubName: Full=Uncharacterized protein  
{ECO:0000313|EMBL:SBP75140.1}; 47..61  
MDAHRGGAPPAGQVVHVRGDSKTELEALFSAVMDPGKASRQPQSLPMRMRKLKLPDSFFKPPPEPRGHSRQ  
ASSDGGVCGSLAPHVRAHSSPASLPVNSLTAQADADVAATPIIPDDVPLPDGWELAKTLTGQRYFINHLEKTTT  
WLDPXLSQLQSAQAHPISCAPIHTHSFNPAPTQAQHIHPETAQKMNPAIILGLAMQORQEKERLRCKQGLPPQ  
ITPQDAAGRNPMPRGMDHRSQAQMLVPSVDARIRALNQEPTLNGAHSRNESTDSGLSVSSLPRTSDHMLSSVDHM  
DTGDSSEPSVTMQETMPVLPITEGEELMPCIPDGLNSDLLMDMETVLSGPHMDRDSLTLTWL  
PMRMRKLKLPDSFFKPP

tr:A0A1A8EFM5\_9TELE [A0A1A8EFM5] SubName: Full=Family with sequence  
similarity 181, member B {ECO:0000313|EMBL:SBQ44452.1}; 148..162  
MNSQFMSFCFPDSVMEYDVEKSLDGSLLCEAENDDDFKETTDRDLSFIDSASSNIKLALDKPVKSKRKY  
NHRKYLQKQIKRCTGIIIPGHVAEGPVERQSGPMQPGPLQSKTPPKRDEVQASLQSKSLAALFSPAKEVRGEKA  
KKPPLRHRNLPPSFFTEPTNCSKVIISTSGMTLKDLEGRNPEAAEFFELLGPDYSNMIGDQDLYQGAPLRAQPD  
GLDPVSYDAHHLVGGLLYSEPWTS CSGPSKKGESLRTGLAQPPPIYSQSEEASGSIDDSGLSSLAFSNFFTDCSI  
PQVTYDLNCGYSKANYSSP PLRHRNLPPSFFTEP

tr:A0A1A8C923\_9TELE [A0A1A8C923] SubName: Full=Family with sequence  
similarity 181, member B {ECO:0000313|EMBL:SBP75588.1}; 148..162  
MNSQFMSFCFPDSVMEYDVEKSLDGSLLCEAENDDDFKETTDRDLSFIDSASSNIKLALDKPVKSKRKY  
NHRKYLQKQIKRCTGIIIPGHVAEGPVERQSGPMQPGPLQSKTPPKRDEVQASLQSKSLAALFSPAKEIRGEKA  
KKPPLRHRNLPPSFFTEPANCSKVIISTSGMTLKDLEGRNPEAAEFFELLGPDYSNMIGDQDLYQGAPLRAQPD  
GLDPVSYDAHHLVGGLLYSEPWTS CSGPSKKGESLRTGLAQPPPIYSQSEEASGSIDDSGLSSLAFSNFFTDCSI  
PQVTYDLNCGYSKANYSSP PLRHRNLPPSFFTEP

tr:A0A093CA05\_9AVES [A0A093CA05] SubName: Full=Protein **FAM181A**  
{ECO:0000313|EMBL:KFV09112.1}; 108..122  
MASDSEVKTLNLFVNLASSDIKAALDKSAPCRRSVDHRKYLQKQLKRFSQKYSRIPRCHPSKPPECGWR  
RGAEDRGGHPQPAEAEESLTGERVLQEQNPEAARPDQVPMRKRQLPASFWEEP  
RPAQSLPARAFPAGPEGLLAPK  
DPPPYEGKSKSWSSDTASPEPPESAPHAGEKDPAGLLGGVGAWTCCPFPCPGPGVYQPPGTLPPSPFPLGLGLW  
RKSAAATLPAEVPHFCKEADGMGQNLRYRPVVLKPIPTKPAVPPPIFNVFSYL PMRKRQLPASFWEEP

tr:A0A3B3ZMU0\_9GOBI [A0A3B3ZMU0] SubName: Full=Uncharacterized protein  
{ECO:0000313|Ensembl:ENSPMGP00000005977}; 46..60

MDAHYGAPPAGQQVVHVRGDSQTELEALFNAVMPNSKVQRQPTSVPMKDRKLPKSFFFTQPEPRGHSRQA  
SSDGGVSNLTTPRHVRAHSSPAILPPQADVTTAPIIPDDMPLPHGWEMAQTPSGQRYFLNHVDKTTTWHDPRLAQ  
LQSAAAQHPLSAAGPPAHSHSLSPLEGEQAVTGDGEVYYIDHINKITTWVDPRLGSTLSNLYMKILRNRMPPGG  
MDHDRNTQTLVPLDVRIRASNHEPTLNGAHSRNESTDSGLSVSSLPRTTDHMLSPVDHMDTGDSGESSLTLQE  
SMPPVLPMSSEGDELMLSSDLLMDMETVLSGSHMDRDSLTLWL PMKDRKLPKSFFFTQP

tr:A0A3B4AU07\_9GOBI [A0A3B4AU07] SubName: Full=Yes-associated protein 1  
{ECO:0000313|Ensembl:ENSPMGP00000019821}; 13..27

MNPKSTIVPPSVPMRMRKLPDSFFFKPPEPKSHSRQASTDAGSGASQTPHHVRAHSSPANLQLGAVSAGS  
LSGMSGASQPQLRQSSYEIPDDVPLPPGWELAKTASGQRYFLNHIEQTTTWDPRKALLQLNQAPASTVPVQ  
QQNLMNPATGPLPDGWEQAITSEGEIYYINHKNKTTSWLDPRLDPRFGLNQQRISQSAPVKPTGQLPPHSAVMGG  
NNQMRLQOLEKERLRLKQOELLRQRPELALRNQLPMDQDGGSNPVSSPMAQDTRTMTANSSDFFLNSGTYHSRD  
ESTDSGLSMSSYSVPRTPDDFLNSVDEMDTGTSMASQPSRFPDYLDALPGTDVDLGTLESESMAVEGEEELMPSLQ  
EALSSDIFNDMESVLTGKIDKESFLTWL PMRMRKLPDSFFFKP

tr:A0A3B4AT14\_9GOBI [A0A3B4AT14] SubName: Full=Family with sequence  
similarity 181 member B {ECO:0000313|Ensembl:ENSPMGP00000019860};  
161..175

MAVQAAIMNPQFLNFCFPGSVMEYDVEKSLDDSSILGEAETEEDYKETTDRLLSFIDSASSNIKLALDK  
PVKSKRKVNHRKYLQKQIKRGTGIIALSNAEPPPPGKRHGSPPMAQTSSTLHTKNLPKRDGVHANLQSKSLAAL  
FSPVQDVRGGDKAKKPLRHRNLPPSFFTEPANCSRVSPTAGTMLKELERGAHVDFELLGPDYSSMVSEQDL  
YQTLVREHSEMGLETTSYDSQHLVGNLLYSAEPKLTNTQAPGFCHSDATSGPIEDGSLCTLAFFNFFTDCSIP  
QVTYDTSGAFSRPNYSSL PLRHRNLPPSFFTEP

tr:A0A3B3ZMV8\_9GOBI [A0A3B3ZMV8] SubName: Full=Uncharacterized protein  
{ECO:0000313|Ensembl:ENSPMGP00000005978}; 46..60

MDAHYGAPPAGQQVVHVRGDSQTELEALFNAVMPNSKVQRQPTSVPMKDRKLPKSFFFTQPEPRGHSRQA  
SSDGGVSNLTTPRHVRAHSSPAILPPQADVTTAPIIPDDMPLPHGWEMAQTPSGQRYFLNHVDKTTTWHDPRLAQ  
LQSAAAQHPLSAAGPPAHSHSLSPLEGEQAVTGDGEVYYIDHINKITTWVDPRLDFLMI FMCYLRASRNEST  
DSGLSVSSLPRTTDHMLSPVDHMDTGKTESCVFDAISSSLTLQESMPPVLPMSSEGDELMLSSDLLMDMETVLSG  
SHMDRDSLTLWL PMKDRKLPKSFFFTQP

tr:U3JNH0\_FICAL [U3JNH0] SubName: Full=Uncharacterized protein  
{ECO:0000313|Ensembl:ENSFALP00000004324}; 57..71

PPPPAGAVAPRDSPGATHRLGPLAELFEYGVHRCLPARAAGGRTQRLERKYGHITPMHRRKLPSPFWK  
EPGPGPASLLHTGTPDFSDLLANWTVEPGPELPGRPGLAEFPFAG PMHRRKLPSPFWKEP

tr:A0A093GY73\_DRYPU [A0A093GY73] SubName: Full=Uncharacterized protein  
{ECO:0000313|EMBL:KFV74321.1}; Flags: Fragment; 59..73

PQCAEAQPEAEALQGSAAVHRLGPLAELFEYGVHRCLPPRGAGSKTQRLERKYGHITPMHRRKLPSPF  
WREPGPGPTGLLHTSTPDFSDLLANWTVEPGLELPGTGRELPSDPGRPGLEAEPFTG PMHRRKLPSPFWREP

tr:I3JBA7\_ORENI [I3JBA7] SubName: Full=Uncharacterized protein  
{ECO:0000313|Ensembl:ENSONIP00000006147}; 45..59

MDAHRGAPPAGQQIVHVRGDSQTELEALFTAVMNPNAKQPSSLPMMRMRKLPDSFFRQPDPRGHSRQAS  
SDGGVCGSQAPHVRAHSSPASLPVNSLSTQAADVAATPIIPDDMPLPRGWEMAKTPTGQRYFLNHLDKTTTWH  
PRLAQLQSAAAQHPI SGPPVHAHSLSNPAPSPLPEGWEQAVTADGEMYYIDHINKITTWVDPRLKFNFKKDRKV  
LKSFPHNCNSQKASLPVFCVTAQKMNP SILGMAMQQSQEKDRLRCKQGIPOQIPPOQDVGGRSQMPGGMDHDSA  
QTLIPSLDVRIRASNHEPTLNGAHSRNESTDSGLSVSSLPRTTDHMLSSVEHMDTGNVPKHTTSTTQKHLRGLFC  
WGDSEPPSMALQDSMPVLPMSSEGEEELMPCIP EGLSSDLLMDMETVLSGSHMDRDSLTLWL  
PMRMRKLPDSFFRQP

tr:I3KYB3\_ORENI [I3KYB3] SubName: Full=Family with sequence similarity  
181 member A {ECO:0000313|Ensembl:ENSONIP00000026110}; 103..117

NMANADSEVKTLNLFVNLASSDIKAALDKSAPCRRSVDHRKYLQKQLKRFSQKYSRVPRCHTHRSAEYR  
CAKPMGTVHQSVTEKASSGAQDQVDHGLSSVEQVPMRKRQLPASFWEEPCLTPTKREHSYLGMKRSHAGTSEGTE

EKRKRSYDDDGAKAAI SACSRRSSTDKETLKL DVTSHHCVSVCGCCPFQYHGHQILHNHIFVPHPPGLWSKASG  
TETERSEHPYGQKIHTHV VVKPIPTKPTAQSPIFSVFGFI PMRKRQLPASFWEEP

tr:A0A3P9PTW4\_POERE [A0A3P9PTW4] SubName: Full=Uncharacterized protein  
{ECO:0000313|Ensembl:ENSPREP00000025143}; 46..60

MDAHRGAPPAGQQVHVVRGDSNTELEALFNAVMPNGKAARQTQSVPMRMRKFPDSFFKPPPEPRGHSRQA  
SSDGGVCSLAPHHVRAHSSPASLPINSVNAVATPIIPDDVPLPEDWEMAKTPTGQRYFINCFIFLIVNKIKQLF  
ISLPKICKLQTFSLTLHLAPATICLLTLYFYCCSGPLPKGWEQAVTAEGEVYIDHIKQETTWDPRLAKTRKAQ  
TEARRPSTICPTGQREYQAGASRSINIQCYPKLLLSLKSNEIKHTRIQQVEAGGSNQMPGGMDHDRSAQMLVPSV  
DIRIRTLNQESNLNGAHSRNESTDSGLSVSSLSRTSDHMLSSVDHMDIGDSSEPPSMGLQESMPVLPINEELMSG  
IPDSLTS DMLMEMD TVLSGPHMDRDSLTLTWL PMRMRKFPDSFFKPP

tr:Q4TA32\_TETNG [Q4TA32] SubName: Full=Chromosome undetermined SCAF7454,  
whole genome shotgun sequence {ECO:0000313|EMBL:CAF90250.1}; Flags:  
Fragment; 131..145

DEEKGLDESL LCEAENEEDYRETT RDLLSFIDSASSNIKLALDKPVKSKRKNVHRKYLQKQIKRCTGII  
TPGNVAEAPVKRQVSP LAQSSPLQSKT PPKREGLQASLQSKSLAALFSPVRDVKGEKTKKPLRHRNLPPSFFTE  
PVSYSKVSSTSGM TLRDLERANPETADFFDLLGPEYGGMVSEQDLYQGIPLRVQPD LGGLDPCYDAHHLVGGLL  
YPEPWTSCSGT SRKAGSGPRSGPHQSPAYCPPEASGPMEEHSLCTLAFPNLF TDCSTPQV TYDLNGACNRPHYS  
L PLRHRNLPPSFFTEP

tr:H3DJ10\_TETNG [H3DJ10] SubName: Full=Family with sequence similarity  
181 member A {ECO:0000313|Ensembl:ENSTNIP00000020504}; 105..119

GRKMASADSEVK TLLNFVNLASSDIKAALDKSAPCRRSVDHRKYLQKQLKRFSQKYSRIPRCHMHRSTE  
HVCAKPAGGVYQRVA AKSDSEVPAAENAAAAAQTPMRKRQLPASFWEEP KLGQTRGQRLALGTDAGGDPEVSQD  
EPRKSADR SALKLDLSSHRCASVCGCCPFQYHGHILHGHIVLPPPP PWSKAAVSDAGRAAHPYAPQIHTHV VVK  
PIPTKPAVQSSIFS VFGFI PMRKRQLPASFWEEP

tr:Q4THS3\_TETNG [Q4THS3] SubName: Full=Chromosome undetermined SCAF2719,  
whole genome shotgun sequence {ECO:0000313|EMBL:CAF87559.1}; Flags:  
Fragment; 47..61

ATWTRTTAPPAGQQIVHVVRGDSQTELEALFSAVMNPSKAARQPSSLPMRMRKLPDSFFRQPDSRGHSRK  
PMRMRKLPDSFFRQP

tr:Q4RM11\_TETNG [Q4RM11] SubName: Full=Chromosome 10 SCAF15019, whole  
genome shotgun sequence {ECO:0000313|EMBL:CAG10571.1}; Flags: Fragment;  
105..119

GRKMASADSEVK TLLNFVNLASSDIKAALDKSAPCRRSVDHRKYLQKQLKRFSQKYSRIPRCHMHRSTE  
HVCAKPAGGVYQRVA AKSDSEVPAAENAAAAAQTPMRKRQLPASFWEEP KLGQTRGQRLALGTDAGGDPEVSQD  
EPRKRSRAGDAPASLAASGRRCADR SALKLDLSSHRCASVCGCCPFQYHGHILHGHIVLPPPP PWSKAAVSDA  
GRAAHPYAPQIHTHV VVKPIPTKPAVQSSIFS VFGFI PMRKRQLPASFWEEP

tr:H3CX97\_TETNG [H3CX97] SubName: Full=Uncharacterized protein  
{ECO:0000313|Ensembl:ENSTNIP00000012882}; 40..54

APPAGQQIVHVVRGDSQTELEALFSAVMNPSKAARQPSSLPMRMRKLPDSFFRQPDSRGHSRKASSDGGV  
CNSLTPHHIRAHSSPASLPVNSLSSQAPDVAATPIIPDDVPLPHGWEMAKTPTGQRYFLNHLDKTTTWHDPRIAQ  
LQSAAAQRPIASTPVH THSLSNPAQRPLPEGWEQAVTADGEVYIDHINKTTT WVDPRLGSTLSNMSIRETFVPS  
RSVFQIMTQKMNPNILGLALQQRQEKERM RQQQLPPLPQEAAGR NQMPGGLDHDRNAQMLVPPPLDVRIRAPN  
HEPTLNGAHSRNESTDSGLSHSLPRTSDHMLSSVDHMDTGDSGDASSMTLQESMPVLP MSEGEEELIPCIPEGLGS  
DLLMDMETVLSGSHMDRDSLTLTWL PMRMRKLPDSFFRQP

tr:Q4SFS1\_TETNG [Q4SFS1] SubName: Full=Chromosome 7 SCAF14601, whole  
genome shotgun sequence {ECO:0000313|EMBL:CAG00511.1}; 46..60

MDAHHGAPPAGQQIVHVVRGDSQTELEALFSAVMNPSKAARQPSSLPMRMRKLPDSFFRQPDSRGHSRKA  
SSDGGV CNSLTPHHIRAHSSPASLPVNSLSSQAPDVAATPIIPDDVPLPHGWEMAKTPTGQRYFLNHLDKTTTWH  
DPRIAQLQSAAAQRPIASTPVH THSLSNPAQPTTQPQNSISPEPGPLPEGWEQAVTADGEVYIDHINKTTT WVD  
PRLAQKMNPNILGLALQQRQEKERM RQQQLPPLPQSPLTQREHRQRPERHSLPRTSDHMLSSVDHMDTG NVL  
YIFHEAFSKKQNSFAFGTKKNPLSQFHSSRLVPSGDSGDASSMTLQESMPVLP MSEGEEELIPCIPEGLGSDLLMD  
METVLSGSHMDRDSLTLTWL PMRMRKLPDSFFRQP

tr:A0A1D5NXI5\_CHICK [A0A1D5NXI5] SubName: Full=Transcriptional  
coactivator YAP1 {ECO:0000313|Ensembl:ENSGALP00000045081}; 83..97  
MDPGQPQPQPQAAPQPPAPQQAAPQPPGRGSGAPGGAAQPPGAGPPPAGHQIVHVRGDSETDLEALFNA  
VMNPKGANVPHTLPMRLRKLPSFFFKPPEPKAHSRQASTDAGTAGALTPQHVRHSSPASLQLGAVSPGTLTPSG  
VVTGPGAPSSQHLRQSSFEIPDDVPLPPGWEMAKTPSGQRYFLNHIDQTTTWQDPRKAMLSQMNVTAPTSPPVQQ  
NLMNSASAMNQRISQSAPVKQPPPLAPQSPQGGVMGGSSSNQQQQMRLQQLQMEKERLRLKHQELLRQELALRSQ  
LPTMEQDGGSQNPVSSPGMSQELRTMTTNSSDPFLNSGTYHSRDESTDSGLSMSSYSVPRTPDDFLNSVDEMDTG  
DSISQSNIPSHQNRFPDYLEAIPGTNVDLGTLEGDGMNIEGEEELMPSLQEQALSSDILNDMESVLAATKLDKESFL  
TWL PMRLRKLPSFFFKPP

tr:A0A1D5PM63\_CHICK [A0A1D5PM63] SubName: Full=Transcriptional  
coactivator YAP1 {ECO:0000313|Ensembl:ENSGALP00000053936}; 13..27  
MNPKGANVPHTLPMRLRKLPSFFFKPPEPKAHSRQASTDAGTAGALTPQHVRHSSPASLQLGAVSPGT  
LTPSGVVTGPGAPSSQHLRQSSFEIPDDVPLPPGWEMAKTPSGQRYFLNHIDQTTTWQDPRKAMLSQMNVTAPTS  
PPVQQNLMNSASGPLPDGWEQAMTQDGEIYYINHKNKTTSWLDPRLDPRFAMNQRISQSAPVKQPPPLAPQSPQG  
GVMGGSSSNQQQQMRLQQLQMEKERLRLKHQELLRQAMRNPSTANS PKHQELALRSQLPTMEQDGGSQNPVSSPG  
MSQELRTMTTNSSDPFLNSGTYHSRDESTDSGLSMSSYSVPRTPDDFLNSVDEMDTGDSISQSNIPSHQNRFPDY  
LEAIPGTNVDLGTLEGDGMNIEGEEELMPSLQEQALSSDILNDMESVLAATKLDKESFLTWL  
PMRLRKLPSFFFKPP

tr:A0A1A8L4M2\_9TELE [A0A1A8L4M2] SubName: Full=Uncharacterized protein  
{ECO:0000313|EMBL:SBR39331.1}; Flags: Fragment; 34..48  
QVVHVRGDSKTELEALFSAVMDPGKASRQPQSLPMRMRKLPSFFFKPPEPRGHSRQASSDGGVCGSLAP  
HHVRAHSSPASLPVNSLTAQADADVAATPIIPDDVPLPDGWEMAKTLTGQRYFINHLEKTTTWLDPRLSQLQSAA  
AQHPISCAPIHHTSFSNPAPTTQAQNIHPETAQKMNPAIILGLAMQQRQEKERLRCKQGLPPQITPQDAAGRNPMP  
RGMDDHRSQAQMLVPSVDARIRALNQEPTLNGAHSRNESTDSGLSVSSLPRTSDHMLSSVDHMDTGDSSEPSSVTM  
QETMPVLPITEGEEELMPCIPDGLNSDLLMDMETVLSGPHMDRDSLLTWTW PMRMRKLPSFFFKPP

tr:A0A1D5NUE6\_CHICK [A0A1D5NUE6] SubName: Full=Uncharacterized protein  
{ECO:0000313|Ensembl:ENSGALP00000043963}; 156..170  
MAAGVIQPLAELRLPSFFPHGLLLPARPEPDFDLSEEDDEEEEEEEEEDEEEAAEESAGCSGPEPAGPNA  
AETTLRLLRFSELISCDIQRYFGRRGREEAAGGHSVPEDCSSPHSSPRDRLGPLAELFEYGVHRCLAPRVVSGKT  
QRLERKYGHITPMHRRKLPPSFWREP GPGPGSLLHASTPDFSDLLAHWTVEPGPELPGSGRELPPVLGHAGLEAE  
PYSGL PMHRRKLPPSFWREP

tr:A0A1L1RVL6\_CHICK [A0A1L1RVL6] SubName: Full=Family with sequence  
similarity 181 member B {ECO:0000313|Ensembl:ENSGALP00000062873};  
142..156  
MAVPAALLSPHLLSFCFPAGGLLGYADLEKGYEGGGVGGGGGGGCEAGDFKEATRDLISFIDSASS  
NIKALDKPVKSKRKNVNRKYLQKQIKRCTGIIAGSSLQSRSLAALFGSLQPGRGSAGSDGGGAAGGGPRKVPLR  
DRNLPPSFFTEPGAKETEKGGGPEAAEFFELLGPEYGALLPEHAAPPQDAFPAGRPPAELGLEHGLYEAAPLPAA  
PHLLGGLLYPEPPWSPGPCSPAKKAPPEALRPLYPEPAAGGDAFGPFFPECP LPPRRCP TTTAAASTGRPTPG  
C PLRDRNLPPSFFTEP

tr:R4GJN3\_CHICK [R4GJN3] SubName: Full=Family with sequence similarity  
181 member A {ECO:0000313|Ensembl:ENSGALP00000042353}; 111..125  
MASDSEVKTLNLFVN LASSDIKAALDKSAPCRRSVDHRKYLQKQLKRFSQKYSRVPRCHPTKPPESDR  
ARSCHGAATEKVLQAAEAEESLTREQAVPEQNPNRDPQVPMRKRQLPASFWEEP RPPQSLPAGGFPPGPEGLP  
VPRDPPPFEGKSKRSQDTIGPESHEPALNAGEKDPTGVLSGRVGAWTCCPFP CPGPAVYQPPGTLPPSFPPLG  
LWRKGTATLPAAEQPFCKDAEGTGQKLYRPVVLKPIPTKPTIPPIFNVFGYLPMRKRQLPASFWEEP

tr:A0A1A8MTN2\_9TELE [A0A1A8MTN2] SubName: Full=Uncharacterized protein  
{ECO:0000313|EMBL:SBR60250.1}; Flags: Fragment; 34..48  
QVVHVRGDSKTELEALFSAVMDPGKASRQPQSLPMRMRKLPSFFFKPPEPRGHSRQASSDGGVCGSLAP  
HHVRAHSSPASLPVNSLTAQADADVAATPIIPDDVPLPDGWEMAKTLTGQRYFINHLEKTTTWLDPRLSQLQSAA  
AQHPISCAPIHHTSFSNPAPTTQAQNIHPETGPLEGWEQAVTADGEVYYIDHINKNTTWVDPRLAQKMNPAIILG  
LAMQQRQEKERLRCKQGLPPQITPQDAAGRNPMPRGMDDHRSQAQMLVPSVDARIRALNQEPTLNGAHSRNESTDS  
GLSVSSLPRTSDHMLSSVDHMDTGDSSEPSSVTM QETMPVLPITEGEEELMPCIPDGLNSDLLMDMETVLSGPHMD  
RDSLLTWTW PMRMRKLPSFFFKPP

tr:A0A3P9ACG0\_ESOLU [A0A3P9ACG0] SubName: Full=Uncharacterized protein {ECO:0000313|Ensembl:ENSELUP00000038723}; 48..62

MDARQGQGAPPVGGQIVHVRGDSQTDLEALFNAVINPKTATLPPSSLPMMRKLKLPDSFFRQPDPRSHSR  
QASSDGNMVGSLAPHHVRAHSSPASLPINTLVTPATNSMATQPLPDDMPLPPGWEMAKTTSQGQPYFLNHLEQTTT  
WHDPRLSHLQTTAAPHPLSAPPPHTHTLAHPGPLEGWEQAVTPEGEVYYINHTTKTTSWLDPRLGKTPPTSSSGS  
KYLMPPTTLTSDPVGVVTRRRQQLQAEKDRLRRKQODLVRPIRAQVRAKTSYNVFIYLDRLFYCTSQYRNFIYISI  
NCAALLTSRFLCDWTLPSYYPVFCVMIGDSGAAQPMAFLEAGPGVCMAMDGEELMPSIQEALSSELLSDMDTVLW  
L PMRMRKLKLPDSFFRQP

tr:A0A3P8Z603\_ESOLU [A0A3P8Z603] SubName: Full=Family with sequence similarity 181 member B {ECO:0000313|Ensembl:ENSELUP00000024251}; 173..187

MAVQTAVMNSPFINFCFPGAVLMEYDMDKSLDGSLLGEMGSEEGGDFRETTRDILLSFIDSASSNIKLAL  
DKPVKSKRKVNHRKYLQKQIKRCTGIISPLGNPAPAAPGPGGLGNKRQGSPTSQAQPHSTPFQPGKPIILKRDGL  
QANLQSKSLAALFKPVKDPVKGERAKKPLRHRNLPLSFFTEPANSPTTATNTPGVTSTSGMFLEDLERGGGNPE  
AADFFELLGPDYSQMLGDQDLFQPSRAGRQVHQLNPDINGPDQALPPSYDFQQLVGGFLYAEPWSTTCTGPKSK  
KGGENTRNSLGPQTMLYSHSDPPMTGSGEDNTLCALAFSNFYFDCSVPQVSYDLSGGDVHSLLCQSGTGEPCFGG  
VKNLL PLRHRNLPLSFFTEP

tr:G1K8Z4\_ANOCA [G1K8Z4] SubName: Full=Uncharacterized protein {ECO:0000313|Ensembl:ENSACAP00000000911}; 209..223

MAVQAAPLAPHGHFPLPFGFSALPAGSLGDFGDLKGFEEGSTLLLDGGTADGDPGDFKELLSFIDSAS  
SNIKLALDKPVKSKRKVNHRKYLQKQIKRNGIIGGTSGTQESSPNPSSQPSSVTAACHCKPPFQQKRTNPSSLSP  
SSGAVHCKPPQPSKRDAASAATLVQSQSLAALFDSLQPSGVGLSSMQPEGGLGSSVPHVVGKKVPLRHRNLPPSF  
FTEPSHS PLRHRNLPPSFTEP

tr:G1KYC8\_ANOCA [G1KYC8] SubName: Full=Family with sequence similarity 181 member A {ECO:0000313|Ensembl:ENSACAP00000020801}; 140..154

SADSEVKTLNLFVNLAASSDIKALDKSAPCRRSVDHRKYLQKQLKRFSQKYARLPRCHHHHHPHMQQP  
SSLRERKAELEGKSRGLNTSESPEASEGRVAVVATTSASILAQSDKACKADHERQQQGTSEALARPQVPMRKR  
QLPASFWEEPRTQGPLSLFASSPLSSSKDLLPLYEGKKSILKGPDGFAKLVPLYEGKKSHPDRRPAEAL  
QVLSTWGCWPFQCHGPQTSPLGYVPLPLAALPSPAAPFPALGLWRKNGGSSMEGEAFGKLGGMGQKVYHRPVV  
WKPIPTKPAAPPATLFSVFGYI PMRKRQLPASFWEEP

tr:A0A1A8EM70\_9TELE [A0A1A8EM70] SubName: Full=Yes-associated protein 1 {ECO:0000313|EMBL:SBQ46838.1}; 45..59

MDPSQHNPAGHQIVHVRGDSQTDLETLFNIVMNPSSSTNIPHSVPMRQRKLPDSFFNPPEPKSHSRQAS  
TDAGSGGVLIIPHVRAHSSPASLQLGAVSAGLSGLAPAGASPQHLRQSSYEIPDDVPLPAGWEMAKTSSGQRYF  
LNHIDKTTTWQDPRKPLLQMNQTSPPSSVVPVQQLSMNPTSGPLPEGWEQAITPEGEIYYINHKNKTTSWLDPRL  
EPRYGLNQQRNTQSAPGKQGGPLPTNSHGGVNMRLQQLIEKERLRLKQHEVLRQRPQELALRNQLPTSMEQDGPT  
NPVSSPLAQDARTMTANSSDPFLNSGTYHSRDESTDSGLSMSSYSVPRTPDDFLNSVDEMMDTGDQLPPSLATQPN  
RFPDYLDIAPGTDVDLGTLESESMAVEGEELMPSLQEPSSDILSDMESVLAATKIDKESFLLTWL  
PMRQRKLPDSFFNPP

tr:A0A1A8EXZ4\_9TELE [A0A1A8EXZ4] SubName: Full=Uncharacterized protein {ECO:0000313|EMBL:SBQ50724.1}; Flags: Fragment; 39..53

PPAGQQVHVVRGDSKTELEALFSVAVMDPGKASRQPHSLPMRMRKLKLPDSFFKPPPEPRGHSRQASSDGGVC  
GSLAPHHVRAHSSPASLPVNSLTAQADADVAASPIIPDDVPLPDGWELAKTLTGQRYFINHLEKTTTWLDPRLSQ  
LQSAQAHPISCAPIHTHSFNPAPTQAPNIHPETAQKMNPAIILGLAMQQRQEKERLRCKQGLPPQITPQDAAG  
RNQMPRGMDHDSRQMLVPSVDARIRALNQEPTLNGAHSRNESTDSGLSVSSLPRTSDHMLSSVDHMDTGDSSSE  
SSVTMQETMPVLPITEGEELMPCIPDGLNSDLLMDMETVLSGPHMDRDSLLTWL PMRMRKLKLPDSFFKPP

tr:A0A3B3CWB4\_ORYME [A0A3B3CWB4] SubName: Full=Yes-associated protein 1 {ECO:0000313|Ensembl:ENSOME00000022098}; 69..83

QKALKGIKRQQAALNPASQSACGTMDPSQHNPAGHQIVHVRGDSQTDLEALFNAVMPKGAIVVPQSV  
MRMRKLKLPDSFFKPPPEPKSHSRQASTDAGSGGVLTIPHVRAHSSPASLQLGAVSGGSLSGMASAGASPQHLRQSS  
YEIPDDVPLPPGWEMAKTTSQRYFLNHIDQTTTWQDPRKALLQLNQATPPSTVVPVQQQNLISPASGPLPEGWEQA  
ITPEGEIYYINHKNKTTSWLDPRLETRYALNQQRITQSAPVKQGGPLPPNPHGGVMGGNSQMLRQQLIEKERMLK  
QOELLRQRPQELALRNQLPTSMDQDGSSNPVSSPMAQDARTMTANSTDPFLNSGTYHSRDESTDSGLSMSSYSVP

RTPDDFLNSVDEMDTVSTFTIPPSRFPDYLDITIPGTDVDLGTLESESMAVEGEEELMPSLQEQALSSDILNDMETVL  
AATKIDKESFLTWL PMRMRKLPDSFFKPP

tr:A0A3B4UIT5\_SERDU [A0A3B4UIT5] SubName: Full=Family with sequence  
similarity 181 member B

{ECO:0000313|Ensembl:ENSSDUP00000018277};>tr:A0A3B4YF40\_SERLL [A0A3B4YF40]  
SubName: Full=Family with sequence similarity 181 member B  
{ECO:0000313|Ensembl:ENSSLDP00000029230}; 155..169

MAVQTAIMNPQFMNFCFPGSVMEYDVEKSLDGSLLGAEENDEYKETTDRDLSFIDSASSNIKLALDKP  
VKSkrkVnhrkylQkQIKRctGIITPGNVAEAPVkrQGSPLAQSPQLQSKTLpkrdgVqANLQSKSLAALFSPVK  
DIRGEKAKKPLRHRNLPPSFFTEPANCSKVSSTSGMTLKDlerGNPEAAEFFELLGPDYSNMVSDQDLYHSMPL  
RVQPEMGGPDASYDAHHLVGGLLYSEPWTSCSGPSKQGESLRTGPAQPPVYCHSEAATGPIEDNALCTLAFPN  
FFTDCSIPQVTYDLSAGSICFGLRCWWSGAISSSSDDCLQNL PLRHRNLPPSFFTEP

tr:A0A1V4KB13\_PATFA [A0A1V4KB13] SubName: Full=Protein **FAM181A**  
{ECO:0000313|EMBL:OPJ81531.1}; 167..181

MSDAAAASTGEKSRRTPLSRLVRRIIIFSWETLHSASSEMASDSEVKTLNfVNLASSDIKAALDKSA  
PCRRSVDHRKYLQKQLKRFSQKYSRIprchpskPpECGWRRGPEdRGHGpQPEAPDPSPHGGAATEKVLRTAELE  
ESLTGERVLQEQNPEASRPDQVPMKRQLPASFWEEPRAQSLPARAFPSNSEGLPVSrdPPPYEGKSKRSSDT  
TGPESPPESALHTGEKDPARVISGRVGTWTCPPFCPRPGVYQPLGSLPPSPFLGLGLWRKSAATLPVEVPNFCK  
EADGTGQKLYRPVVLKPIPTKPAVPPPIFNvFGYL PMKRQLPASFWEEP

tr:A0A1V4KTG3\_PATFA [A0A1V4KTG3] SubName: Full=Uncharacterized protein  
{ECO:0000313|EMBL:OPJ87712.1}; 187..201

MHGRAAAPRVSPGPRVPLCANMAAGVIQPLAKLQLPSPFRHNLPLPTRPEPDFDLSEEEEEEEEEEDDE  
EETAENVGPELAIPSAAETTLQLLKFSELISCDIQRYFGRRQEEATGSRGVPEDCGSPQCAKAHPDATTLQGG  
PGAMHRLGPLAELFEYGVHRCLPPQAASGKTQRLERKYGHITPMHRRKLPPSFWREPpGPGPSTLLHTSTPDFSDL  
LANWTVEPGQELPGTGQEPPEPGRPGLEAEPFTGL PMHRRKLPPSFWREP

tr:A0A060VV16\_ONCMY [A0A060VV16] SubName: Full=Uncharacterized protein  
{ECO:0000313|EMBL:CDQ56195.1}; 103..117

MASADSEVKTLNfVNLASSDIKAALDKSAPCRRSVDHRKYLQKQLKRFSQKYSRMprchthrsADMTF  
INEKGGSGAQDEVNVRMGONPIADSANSKQDQVPMKRQLPASFWEEPRLAQNTTEPSLYGWKKSQGVTRINRVE  
KKIKNHQEPKPTLFQSNRLGSIEKEPLNVDLVSHNVSVCGCCPFQYHGHHVFQSHIVVPHSTVGLWGKASVAEIE  
TPDMAHGHNNTHVvVVKPIPTKPTVPSSIFSVFGFI PMKRQLPASFWEEP

tr:A0A060Z9U1\_ONCMY [A0A060Z9U1] SubName: Full=Uncharacterized protein  
{ECO:0000313|EMBL:CDR00833.1}; 158..172

MAVQTAIMNSPFVNFVFCFPGSVMMEEETTRSLDGSPLSESEERGEYRETTNRNLSFIDSASSNIKLALDKP  
VKSkrkVnhrkylQkQIKRctGFISPTGNPAAAPGANKRKLQTPSPFQGGKPVHKRDGLQANLQTKSLAALFNS  
VKEPVKGERAKKPLRHRNLPPSFFTEPANTTTTTSRVTSTRACSWIWNGERGTQTSLTCWGRTTVTCsvirtCF  
RLAACPVGLGPLLLLLRRQGRAAYGRAQEHHPCTVTLCPTPLRQGLQRIVTHCALWPFQLLPRLLCVSGLICGGY  
NTKDFSSL PLRHRNLPPSFFTEP

tr:A0A060XRJ6\_ONCMY [A0A060XRJ6] SubName: Full=Uncharacterized protein  
{ECO:0000313|EMBL:CDQ79555.1}; 48..62

MDARQGQCAPPVGGQIVHVRGDSQTDLEALFNsvMNPKTSALPPSSLPMRMRKLPDSFFRQPDPRSHSR  
QASSDGTIVGSLTPHHVRAHSSPASLPINALSAPATSAMATQPLPDDVPLPPGWEMTKTPSGQCYFLNHLDQTTT  
WHDPRLSHLQTNAAHLLSAPPHHTHTLAHPANTHTQSNTSSNTGTTLFFSLSVSVSPSLSLSLRERERERET  
QTDRTDRQTDRTDRQTDRTDISVQPLDN PMRMRKLPDSFFRQP

tr:A0A0P7WT42\_9TELE [A0A0P7WT42] SubName: Full=Uncharacterized protein  
{ECO:0000313|EMBL:KPP66915.1}; 75..89

MLRMASADSEVKTLNfVNLASSDIKAALDKSAPCRRSVDHRKYLQKQLKRFSQKcarmprwhahRAPD  
AGEQVPMKRQLPASFWEEPsaargrRETGPGAWRKCHAASSLLQEQERRKSSSEEPASDAAVSTQQRLLTLETETEP  
PVLHMMSSGSVNVCGCCPSFQFHGHVVFQSHVVLPSSAFSHVGLWskAREAADGASHGQKRQSHAVLkPIPTKPP  
GPSPVFSVFGFI PMKRQLPASFWEEP

tr:A0A0P7XD32\_9TELE [A0A0P7XD32] SubName: Full=Uncharacterized protein  
{ECO:0000313|EMBL:KPP73128.1}; 70..84

MQQAEFFVPEKPISTFWSNNNSVKDFQLSQHNPPAGHQIVHVRGDSETDLEALFNAVMPKNAIVPHSV  
PMRMRKLPDSFFKPPPEPKSHSRQASTDAGTAGSLTPQHVAHSSPASLQLGAVSPASMAMTPPGGPPQHLRQSS  
YEIPDDVPLPPGWEMAKTSSGQRYFLNHLEQSTTWQDPRKTMQMNTSPNSSVSVQQGIMGTASGFLPEGWEQAV  
TTDGEIYYINHNKNTTSWLDPRLDPRYALNQQRIGQSATVKQAPALPSSPQGGVMGGGSQLRLQLQMEKERVR  
LKQQELLRQRPQVGLPTLHA PMRMRKLPDSFFKPP

tr:A0A0P7XN64\_9TELE [A0A0P7XN64] SubName: Full=Protein **FAM181B**-like  
{ECO:0000313|EMBL:KPP78288.1}; 214..228

MSPSVQLGGVQKCPQWQDQGF AHLPEQEDAACFCEAPPPGTAVDAVGEAGCDAVMAVQAALMTPQF  
ANFCFPVLEYEAEKPFDDGSLGEGACEGDFREATRDLLSFIDSASSNIKLALDKPVKSRRKVNHRKYLQKQIK  
RCAGIAGTLGAAQDLGKRPSSPPTHPGGCVPARPPSKRDGLQANLQSRSLAALFEPMRDARGDKARKPPLRQRN  
LPPSFFTEPAHRCARVTSTSGVTLKDLERGNPEAADFLELLGPDYSGMLTGEQETVPPCASGQSARTEAPQPPPYC  
PSDSSVSSTLEEAAPCALAFHSFFTECSIPPGAYDFGAGYSRAAFPSL PLRQRNLPPSFFTEP

tr:A0A3N0YHY1\_ANAGA [A0A3N0YHY1] SubName: Full=Uncharacterized protein  
{ECO:0000313|EMBL:ROL45481.1}; 154..168

MAASVIRTLNLGFTKPPFPSPFFPAEDEEEETEYEEELREDSLEEEEDGVASESQEEEPWSFDLTPNN  
TEMTNQLLRFAELISNDVQRYFGRSQDPDACDIYAERPCPKVGGQRYYADFIKVASGQVEEPESLGPLAELFQ  
DAQRKGRGLPMSQRRLPISFWTEPFAHQLDVLSDANTQENSLSMIDTSESSINISTLSMFSNTSVCTMTSSSVS  
GTLSSSSTPDFSDLLAHWAMDRENPFENCDYQLS PMSQRRLPISFWTEP

tr:A0A3N0YL46\_ANAGA [A0A3N0YL46] SubName: Full=Protein **FAM181A**  
{ECO:0000313|EMBL:ROL46601.1}; 107..121

MANSDSEVKTLNLFVNLAASDIKAALDRSAPCRRSVDHRKYLQKQLKRFSHRYSKVPRCHPHRTSDPTC  
AKAGVFARDGPGNGTEARLATDLSPNSEDDARAGHVPMRKRQLPASFWKEPQSSTGSRECLEHFLKTNANGTVN  
VRSHGERKMIHDNPLSSNAEPPRRSAACACCPLOYHALHSRFLLPQADAAAYRNKTTETHNFIDGLHNSSSHVV  
IKPIPTKPAISSIFSFGFI PMRKRQLPASFWKEP

tr:A0A3N0YUP0\_ANAGA [A0A3N0YUP0] SubName: Full=Protein **FAM181B**  
{ECO:0000313|EMBL:ROL49926.1}; 156..170

MAVQAAIMNSQFLNFCFPGSVM DYEVKGLGGLLGEVDCDGFRETTRDLLSFIDSASSNIKLALDKP  
VSKSRKVNHRKYLQKQIKRGTGII SPGTTVPQEPCKRQGSQPNPTSNLSSKTPPKKDGMOANLQSKSLAALFNPA  
KDVRGERAKKPPLRHRNLPPSFFTEPANSSRVSTSGMSLKDLERGTPAAEFLELLGPDYSNMVSEQDLFHTAP  
IRIQQEVSMGPEPYDSSHFFVTGGFLYTEPWGTCSDTPKKS GDMRTLVPQPNLYTHTDLSGSLPVEQSSPCALTF  
NFFTDCSTPPVSYDLANGYNRGSFSSL PLRHRNLPPSFFTEP

tr:A0A3N0YBQ8\_ANAGA [A0A3N0YBQ8] SubName: Full=Transcriptional  
coactivator YAP1 {ECO:0000313|EMBL:ROL43198.1}; 45..59

MDPSQHNPPAGHQIVHVRGDSETDLEALFNAVMPKNTIVPPSVPMRMRKLPDSFFKPPPEPKSHSRQAS  
TDAGTAGTLTPQHVAHSSPASLQLGAVSPGNLSSMGPANAPPQHLRQSSYEIPDDVPLPPGWEMAKTSPGQRYF  
LK PMRMRKLPDSFFKPP

tr:A0A096M0A1\_POEFO [A0A096M0A1] SubName: Full=Yes-associated protein 1  
{ECO:0000313|Ensembl:ENSPFOP00000024842}; 45..59

MDPNQHNPPAGHQIVHVRGDSQTDLELLFN SVMNPKSSNVPASLPMRMRNL PDSFFKPPPEPKSHSRQAS  
TDAGSGGVLT PHHVAHSSPASLQLGAVSGGSLSGMASAGASPOHLRQSSYEIPDDVPLPAGWEMAKTTSQRYF  
LNHNDKSTTWQDPRKALLQTSQPAPSSVVPVQPNLMNPANGPLPEHWEQAITSEGEIYYINHEKRTTSWLDPR  
EPRYAALNQQRMTQSAPGKQSGQLPPSTHGGVMAGNNQLRLQOIEKDRLRLQQRHPQRPQELALRNQLPTSMDQD  
GSTNPISSPLAQDARTMTVNSSDPFLNSGTYHSRDESTDSGLSMSSYSVPRTPDFFLNSVDEMDTGDSL P  
ASMAS QPSRFPDYLDGIPGTDVLDLGTLEGESMAVESEELMASLQEPLSSDILSDMESVLAATKIDKENFLT  
WL PMRMRNL PDSFFKPP

tr:A0A087X9W3\_POEFO [A0A087X9W3] SubName: Full=Yes-associated protein 1  
{ECO:0000313|Ensembl:ENSPFOP0000002566}; 45..59

MDPNQHNPPAGHQIVHVRGDSQTDLELLFN SVMNPKSSNVPASLPMRMRNL PDSFFKPPPEPKSHSRQAS  
TDAGSGGVLT PHHVAHSSPASLQLGAVSGGSLSGMASAGASPOHLRQSSYEIPDDVPLPAGWEMAKTTSQRYF  
LKLQKSEREQDISSHNKSTTWQDPRKALLQTSQPAPSSVVPVQPNLMNPANGPLPEHWEQAITSEGEIYYIN  
HEKRTTSWLDPRLEPRYALNQQRMTQSAPGKQSGQLPPSTHGGVMAGNNQLRLQOIEKDRLRLQQRHPQ  
ELALRNQLPTSMDQD GSTNPISSPLAQDARTMTVNSSDPFLNSGTYHSRDESTDSGLSMSSYSVPRTPD  
FFLNSVDEMDTGDSL P



SLPASMASQPSRFPDYLDGIPGTDVDLGTLEGESMAVESEELMASLQEPSSDILSDMESVLAATKIDKENFLTW  
L PMRMRNLPDSFFKPP

tr:A0A087YKH0\_POEFO [A0A087YKH0] SubName: Full=Uncharacterized protein  
{ECO:0000313|Ensembl:ENSPFOP00000018523}; 46..60

MDAHRGAPPAGQQVVHVRGDSNTELEALFNAVMPNGKAARQTQSVPMRMRKFPDSFFKPPPEPRGHSRQA  
SSDGGVCGSLAPHHVRAHSSPASLPINSVNVAATPVIIPDDVPLPEDWEMAKTPTGQRYFINHAQRSTTWQDPRLS  
QLQSAAAHNPAPTTQPKNIIIPETGPLPKGWEQAVTAEGEVYYIDHIKQETTWDPRLVQCALLEQLNLWQQDSKK  
EGSQAPKVNPAAGLPLAIQQRLEKLRKHPVPPQFAPQVQEAGGSNQMPGGMDHRSQMLVPSVDIRIRALNQES  
NLNGRFVNNCRAHSRNESTDSGLSVSSLSRTSDHMLSSVDHMDTGIDVSCPGYCKSHSVVICSGDSSEPPSMGL  
QESMPVLPINEELMSGIPDSLTSMDLMDTIVLSGPHMDRDSLTLTWL PMRMRKFPDSFFKPP

tr:A0A087YS39\_POEFO [A0A087YS39] SubName: Full=Family with sequence  
similarity 181 member B {ECO:0000313|Ensembl:ENSPFOP00000020842};  
155..169

MAVQTAIMNPQFMSFCFPDSVMEYDVEKSLDGSLLCEAENDEDFKETTRDLLSFIDSASSNIKLALDKP  
VKSKRKNVHRKYLQKQIKRCTGIITPGNTSEAPVKRQGSQVPSQQGPLQSKTLQKREGGQANLQSKSLAALFSPVK  
EIRGEKAKKPPMRHRNLPPSFFTEPANCSRVSSTSGMTLKDLEGRNPEAADFFELLGPDYSNMVNEQDIYQGVPL  
RGQPDGLGLDPASYDHLVGGLLYTEPWTNCSGPKKPSSEGLRTGPPQPPVYSQAEDTSVPLDDNGLCTLTFFPNF  
PDCSISQVTYDLNGGYNKTNFSC L PMRHRNLPPSFFTEP

tr:A0A087YQW4\_POEFO [A0A087YQW4] SubName: Full=Family with sequence  
similarity 181 member A {ECO:0000313|Ensembl:ENSPFOP00000020417};  
108..122

KELLVKMSSADSEVKTLLNFVNLAASSDIKAALDKSAPCRRSVDHRKYLQKQLKRFSQKFSRVPRGQTLT  
SADYRCARGAERQRTVTDEASSDAQLAQSVGGVMDQVPMRKRQLPASFWEEPRLTKARRDKPCLDLRRSSSSGT  
SDDGENERRRSQEDAQKTANSSSGRRSSAEKEVLKLDLTSHRSVSFCSCCPFFQFQGHQVLHSQIVVPHPPFGLWS  
KAAEPERSEHPYGQKLHTHVVVKPIPTKATAQSPILSVFGFI PMRKRQLPASFWEEP

tr:U3ITU9\_ANAPL [U3ITU9] SubName: Full=Family with sequence similarity  
181 member A {ECO:0000313|Ensembl:ENSAPLP00000010672}; 109..123

MASDSEVKTLLNFVNLAASSDIKAALDKSAPCRRSVDHRKYLQKQLKRFSQKYSRVPRCHPEVDPDPGPHS  
GAAAEKVLQAAEAVESLAGERALPEQNPEAGRAEQVPMVPMRKRQLPASFWEEPRAQSLPSRGFPFPGPECAAPR  
DTPPFEGKKSRSRLDTAGPESPPEPALQAGEKDPAGVLSGRVGTWTCPPFCPGPAVYQPPGTLPPSPFPGGLGLW  
RKSAATLPAAEQPFCKEAEGAGQKLYRPVVLKPIPTKPAVPPPIFNVFGYL PMRKRQLPASFWEEP

tr:A0A0A1CTT9\_ANAPL [A0A0A1CTT9] SubName: Full=Yes-associated protein 1  
{ECO:0000313|EMBL:AIX99598.1}; Flags: Fragment;>gp:KM924429\_1 [KM924429]  
Yes-associated protein 1 [Anas platyrhynchos] 13..27

MNPKGANVPHTLPMRLRKLKLPDSFFKPPPEPKAHSRQASTDAGTAGALTPQHVRHSSPASLQLGAVSPGT  
LTPSGVVTGPGAPSSQHLRQSSFEIPDDVPLPPGWEMAKTSPGQRYFLNHIDQTTTWQDPKAMLSQMNVTAPTS  
PPVQQNLNMSASGPLPDGWEQAMTQDGEIYYINHNKNTTSLWLDPRDPFAMNQRISSAPVKQPPPLAPQSPQG  
GVMGGSSSNQQQQMRLQQLQMEKERLRLKHQELLRQELALRSQLPMTMEQDGGSQNPVSSPGMSQELRTMTTNSD  
PFLNSGTYHSRDESTDSGLSMSSYSVPRTPDDFLNSVDEMMDTGDSISQSNIPSHQNRFPDYLEAIPGTNVLDLGT  
EGDGMNIEGEELMPSLQEQALSSDILNDMESVLAATKLDKESFLTWL PMRLRKLKLPDSFFKPP

tr:A0A087V9J2\_BALRE [A0A087V9J2] SubName: Full=Protein **FAM181A**  
{ECO:0000313|EMBL:KFO09284.1}; 112..126

MASDSEVKTLLNFVNLAASSDIKAALDKSAPCRRSVDHRKYLQKQLKRFSQKYSRIPRCHPSKPSSETGWR  
RGVGDGRGATEKVLRTAEVEEGLTGELVLQEQNPEAGRPDQVPMRKRQLPASFWEEPAPASLPARAFPTGAEGL  
PSPRPDPPEYEGKKSRSRLDTAGPESPPEPAPHAGEKDPAGVLSGRVGVWTCPPFCPGPVYQPPGTLPPSPFPG  
LGLWRKSAATLPVEVPHFCKEADGMGQKLYRPVVLKPIPTKPAIPPPPIFNVFGYL PMRKRQLPASFWEEP

tr:A0A3B5MWC4\_9TELE [A0A3B5MWC4] SubName: Full=Uncharacterized protein  
{ECO:0000313|Ensembl:ENSXCOP00000023934}; 46..60

MDAHRGAPPAGQQVVHVRGDSKTELEALFNAVMPNSKATRQPPSVPMRMRKFPDSFFKPPPEPRGHSRQA  
SSDGGGLCGSLAPHHVRAHSSPASLPVNSLSAQADADAAATPIIPDDVPLPDGWEAKTSTGQRYFINHVHRTTTW  
QDPRLSQLQSAAAHQIACPLPEGWEQAVTTDGEMYYIDHINQATTWDDPRLAQTEAGHPSTICPTGHRERQAGA  
SRSINIQCYPKLLLSLKLNETKHTRIQVQEAGGSNQMPGGMDHRSQMLVPSVDIRIRALNQEPNLNGAHSRNE

STDSGLSVSSLSRTSDHMLSSVDHMDTGIVPYSCFYQLPSQIHDIFNFIFPPSMGLQESMPVLPINEDLMPGIPD  
SLTSDMLMEMDVTLSGPHMDRDSLTLTWL PMRMRKFPDSFFKPP

tr:A0A3B5LC93\_9TELE [A0A3B5LC93] SubName: Full=Family with sequence  
similarity 181 member B {ECO:0000313|Ensembl:ENSXCOP00000008462};  
155..169

MAVQTAIMNPQFMSFCFPDSVMEYDVEKSLDGSLLCEAENDEDFKETTRDLLSFIDSASSNIKLALDKP  
VSKSRKVNHRKYLQKQIKRCTGIIITPGNTSEAPLKRQGSFVNQQGPVQSKTLQKREGGQANLQSKSLAALFSPVK  
EIRGEKAKKPPMRHRNLPPSFFTEPANCSRVSSTSGMTLKDRLERGNPEAADFFELLGPDYSNMVNEQDIYQGVPL  
RGQPDGLGGLDPASYDHLVGGLLYTEPWTNCSGQCKKPSSEGLRSGPPQPPVYSQAEDTSVPLDDNGLCTLTFFPNFF  
PDCSISQVTYDLNGGYNKTHFSCPGFFF PMRHRNLPPSFFTEP

tr:K7FW09\_PELSI [K7FW09] SubName: Full=Yes associated protein 1  
{ECO:0000313|Ensembl:ENSPSIP00000012219}; 73..87

MDPGQPQQAPPAQQQAPQPPGAQSGAGQPPGAGPPPAGHQIVHVRGDSETDLEALFNAVMPKGANVP  
HTLPMRLRKLPSFFKPPPEPKAHSRQASTDAGSAGALTPQHVRHSSPASLQVGAVSPGTLTPSGVVTGPGAAPS  
SQHLRQSSFEIPDDVPLPPGWEMAKTPSGQRYFLNHIDQTTTWDQPRKAILSQMNVTAPTSPVQOSIMNSASAM  
NQRISQSAPVKQPPPLAPQSPQGGVMGGSSNQOQMRLLQQLQMEKERLRLKHQELLRQALRNINPSTANSFKRQ  
ELALRSQPLSMEQDGGSQNPVSSPGMSQELRTMTTNSDDPFLNSGTYHSRDESTDSGLSMSSYSVPRTPDDFLNS  
VDEMMDTGDISQSNIPSHQNRFPDYLEAIPGTNVDLGTLEGDMNIEGEEELMPSLQEQALSSDILNDMESVLAATKL  
DKESFLTWL PMRLRKLPSFFKPP

tr:G3PEP3\_GASAC [G3PEP3] SubName: Full=Yes-associated protein 1  
{ECO:0000313|Ensembl:ENSGACP00000016067}; 38..52

PPVGHQIVHVRGDSETDLEALFNAVMPKNTIVPPSVPMRMRKLPSFFKPPPEPKSHSRQASTDAGTGG  
VLTPHHVRHSSPASLQLGAVTGGMSGMPPSPQHRLRQSSYEIPDDVPLPPGWEMAKTASGQRYFLKTTAWQDP  
RKALLQMNQAPPSTGPVQQNIMNPASGPLPEAWQAITSDGEIYYINHKNKTTSWLDPRLDPRFALNQQRISQ  
SAPVKQGGQLPPGFAVGNQMRLLQQMEKERLRQKQELLRQRQVRNREEKSRKKWKKRRNELSIRNQLPTSMQ  
DGGTNPVSSPMAQDARTMTANSTDPFLNSGTYHSRDESTDSGLSMSSYSVPRTPDDFLNSVDEMMDTGDALPPSMA  
TQPSRFPDYLDIAIPGTDVLDLGTLESESMAVEGEEELMPSLQEQALSSDILNDMESVLAATKIDKESFLTWL  
PMRMRKLPSFFKPP

tr:A0A226P518\_COLVI [A0A226P518] SubName: Full=Uncharacterized protein  
{ECO:0000313|EMBL:OXB74499.1};>tr:A0A226MFB5\_CALSU [A0A226MFB5] SubName:  
Full=Uncharacterized protein {ECO:0000313|EMBL:OXB53971.1}; 179..193

MAAGVIQPLAELRLPSFFPHSLLLPRRTEPEFPDLSEEDDEEEEEDEEEAAEESTGCSEPELASPNA  
ETTLRLLRFSELISCDIQRYFGQRGREGAAAGGHSVPEDCSSPRSSPRDLDLEHTARAGQAQAVLGGGHGAAHRLG  
PLAELFEYGVHRCLAPQAAGGKTQRLERKYGHITPMHRRKLPPSFWREPAPGPASLLHAGTPDFSDLLAHWTAEP  
GPPELPGSGRELPPAQGHAGMEAEPYGGL PMHRRKLPPSFWREP

tr:A0A226P454\_COLVI [A0A226P454] SubName: Full=Uncharacterized protein  
{ECO:0000313|EMBL:OXB74169.1}; 164..178

MAVPAALLSPHLLSFCFPAGGLLGYADLEKGYEGGGGGGGGGGGEDFKEATRDLDSFIDSASSNIK  
LALDKPVKSKRKNVHRKYLQKQIKRCTGIIAPPPAAPPAPCPKPPPPRRDGSQAGSSLQSRSLAALFGSLRPG  
RGSAGSDGGAAGGGPRKVLDRNLPPSFFTEPGAKEAEKAGGQEAADFLELLGPEYGALLPEHACPPRDAFPA  
ARPPAELGMEHGMYEAAAPHLLGGLPYPEPPWSPPGPCSPAKKAPSEALRPLYPEPSVGGDAFGFFFPECPLQLP  
YEYGAGFHRAAYSGL PLDRNLPPSFFTEP

tr:A0A226P1D5\_COLVI [A0A226P1D5] SubName: Full=Uncharacterized protein  
{ECO:0000313|EMBL:OXB73199.1}; 127..141

MASDSEVKTLLNFVNASSDIKAALDKSAPCRRSVDHRKYLQKQLKRFSQKYSRVPRCHATKPLECGPR  
RGAEDRARSCQPEVPDPSPHSGAATEKVLQAAEAESLAGEQAVPEQNPEDSRPDLVPMRKRQLPASFWEEPRA  
QSI PARGFPLGTEGLPVPRDPPPFEGKSKRSQDAAGPESHEPALHAGEKDPTSVLSGRVGAWTCCPFPCPGPAV  
YQPPGTLPPSFPGLGLWRKDAASLPAAEQPFSKEAEGTGQKLYRPVVLKPIPTKPTIPPPPIFNVFGYL  
PMRKRQLPASFWEEP

tr:G3PED8\_GASAC [G3PED8] SubName: Full=Family with sequence similarity  
181 member B {ECO:0000313|Ensembl:ENSGACP00000015962}; 153..167

MAVQTAIMNPQFMNFCFPGSVMEYDVEKSLDGSLLGEAETEEDYRETTSDLLSFIDSASSNIKLALDKP

VKSKRKNVHRKYLQKQIKRCTGIITPANTAEAPVKRQGSPPAAQPSQSKTPPKRDGVQASLQSKSLAALFSPVKDI  
RGERTRPPLRHRNLPPSFFTEPANCSKVSSTSGMTLKDLEGRNPEAAEFFELLGPDYSNMVSEQDLYQSVRVQP  
EMGGPDPTSYEAQHLVGGLLYSEPWTSYSGPCKKVGASQPPVYCPSEAASVSVEDNALCTLAFFNYFTDCSAPQA  
TYDLSGGYNRANYSSL PLRHRNLPPSFFTEP

tr:G3NZF7\_GASAC [G3NZF7] SubName: Full=Family with sequence similarity  
181 member A {ECO:0000313|Ensembl:ENSGACP00000010729}; 104..118

MANADSEVKTLNLFVNLASSDIKAALDKSAPCRRSVDHRKYLQKQLKRFSQKYSRVPRCHAHRSQDYG  
TEPMGAARLRADVTKKAASDAPRAEDAGSAAEQVPMRKRQLPASFWEEPKLSPAKREAPHLGLKRSHAGAAEGSE  
NEKRRRGCDKDDARAALSASSWSRSGADREALKLDVTSRHCANACGCCPFQYHGHQVLHSHIVVPHQPGLGWSKAA  
EAERPEHPYGAKIHTHVVKPIA PMRKRQLPASFWEEP

tr:G3PEN8\_GASAC [G3PEN8] SubName: Full=Yes-associated protein 1  
{ECO:0000313|Ensembl:ENSGACP00000016062}; 38..52

PPVGHQIVHVRGDSSETDLEALFNAMNPKNTIVPPSVPMRMRKLPDSFFKPPPEPKSHSRQASTDAGTGG  
VLTPHHVRAHSSPASLQLGAVTGGSMSGMPSPQHLRQSSYEIPDDVPLPPGWEMAKTASGQRYFLKAILIRTT  
AWQDPRKALLQMNQAPPSTGPVQQNIMNPASGGLPEAWEQAITSDEIYYINHNKNTTSWLDPRLDPRFALNQ  
QRISQSAPVKQGGQLPPGFAVGNMQMRLQOMEKERLRQKQOELLRQRPQVRNREEKSRKKWKELSI RNQLPTSM  
QDGGTNPVSSPMAQDARTMTANSTDPFLNSYVSSGTYHSRDESTDSGLSMSSYSVPRTPDDFLNSVDEMDTGDAL  
PPSMATQPSRFPDYLDIAIPGTDVDLGTLESESMAVEGEELMPSLQEQALSSDILNDMESVLAATKIDKESFLT  
PMMRMRKLPDSFFKPP

tr:G3QBL9\_GASAC [G3QBL9] SubName: Full=Uncharacterized protein  
{ECO:0000313|Ensembl:ENSGACP00000027285}; 49..63

LGDMDAHRGAPPVGGQIVHVRGDSQTELEALFSAVMNPNKSARQPSSLPMMRMRKLPDSFFRQPD SRGHS  
RQASSDGGVCGSLTPHHVRAHSSPASLPVNSLSTQAADVAAATVVPDDVPLPHGWEMAKTPTGQRYFLNHLDKTT  
TWHDPRLSQLQSAAAQHPIAGTPVHAHSLSNPAPTTQQQNTNPETGIAPPPSSHRSRTSLPTFLYSFHLYNRNR  
LKRNRQREKERLRCKQGLPQITQEAGGRNQMPGMDHDRNAQTLVPLDVRIRASSHEPTLNGAHSRNESTDSG  
LSVSSLPRSSDHMLSSVGDGETSSMTVQESMSVLPMSSEGEELMPCIEGLSSDLLMDMETVLSGSHMDRDSLLT  
WL PMRMRKLPDSFFRQP

tr:M4B0N5\_XIPMA [M4B0N5] SubName: Full=Family with sequence similarity  
181 member B {ECO:0000313|Ensembl:ENSXMAP00000020280}; 155..169

MAVQTAIMNPQFMSFCFPDSVMEYDVEKSLDGSLLCEAENDEDFKETTRDLSFIDSASSNIKLALDKP  
VKSKRKNVHRKYLQKQIKRCTGIITPGNTSEAPVKRQGSPPVSOQGPVQSKTLQKREGGQANLQSKSLAALFSPVK  
EIRGEKAKKPPMRHRNLPPSFFTEPANCSRVSSSTSGMTLKDLEGRNPEAADFFELLGPDYSNMVNEQDIYQGVPL  
RGQPDGLGDPASYDHLVGGLLYTEPWTNCSGQCKKPSGLRSGPPQPPVYSQAEDTSVPLDDNGLCTLTFPNPF  
PDCSISQVTYDLNGGYNKTHFSYGSNGSWKGFPTTPIWP PMRHRNLPPSFFTEP

tr:A0A3M0K2T0\_HIRRU [A0A3M0K2T0] SubName: Full=Uncharacterized protein  
{ECO:0000313|EMBL:RMC07463.1}; 171..185

MAVPAALLSPHLLSFCFPAAGGLLGYADLEKGYEGGGDDAGDFREATRDLSFIDSASSNIKLALDRP  
VKSRRKNVHRKYLQKQIKRCTGIIAAAAPPPAACPPAACPARPPPRREPAQAAGSSLQSKSLAALFGLSQRGRGA  
AGGAEAKAGGGGAGGGEKAAGGPRKVPLRDRNLPPSFFTEPALPGPAARGPPAKEPEKGGGSGAEAAEFFELL  
PEYGALLPEHAAPTDAFGRLPAELGLEHGLYELPLPAGPHLLGGLLYPEPPWSPAAPCSPPRKAPAEPPRPLF  
PGGAEPVPGGGGGGDEPGHLPAGFAPFFPECPLPPPQPPYDGGGFHRRGGYPGL PLRDRNLPPSFFTEP

tr:A0A3M0JCV9\_HIRRU [A0A3M0JCV9] SubName: Full=Uncharacterized protein  
{ECO:0000313|EMBL:RMB98792.1}; 127..141

MASDSEVKTLNLFVNLASSDIKAALDKSAPCRRSVDHRKYLQKQLKRFSQKYSRI PRCHPSKAPECGWR  
RGAEDRARGPQPEAPDPSPHGGAAEKVVRTAEAEESLTGEMGLQEOKPEAARPDQVPMRKRQLPASFWEEP  
RSLTAGAFPASPEGLQAPRDPPEYEGKKNRSPDAAGPESPPDTVPHAGEKDPAGALSGRVGAWTCCFPFCPGP  
VYQPPGALPPSPFPLGWPWRKSAATLPAEVPHFCKEADGPGQKLYRPMVLKPIPTKPAIPPIFNVFGYL  
PMRKRQLPASFWEEP

tr:A0A3M0K235\_HIRRU [A0A3M0K235] SubName: Full=Uncharacterized protein  
{ECO:0000313|EMBL:RMC07369.1}; 13..27

MNPKGANVPHTLPMRLRKLPSFFKPPPEPKAHSRQASTDAGTAGALTPQHVRHSSPASLQLGAVSPGT

LTPSGVVTGPGAPSSQHLRQSSFEIPDDVPLPPGWEMAKTPSGQRYFLKSGKLVSKIIVLLEAKTVATAFDVLLH  
FGRPSVAEFCL PMRLRKL PDSFFKPP

tr:A0A3M0KX01\_HIRRU [A0A3M0KX01] SubName: Full=Uncharacterized protein  
{ECO:0000313|EMBL:RMC17829.1}; 165..179

MAAGVIQPLAELRLPSFFPHGLLLPMHPEPDFDLSEEEEEEEEEEEEEEDVEAVEESVRPELAGVSST  
AESTLRLLLKFSELISCDIQRYFGRRGREEAGSRAVPEDCGSPQGAEAVPEAAAPGATHRLGPLAELFEYGVHRCL  
PARAAGGKTQRLERKYGHITPMHRRKLPSPFWKEPGPGPASLLHAGTPDFSDLLANWTVEPGPELPGTGREPPGR  
PGLEAEPFAGL PMHRRKLPSPFWKEP

tr:A0A0S7IVU8\_9TELE [A0A0S7IVU8] SubName: Full=F181A  
{ECO:0000313|EMBL:JAO56122.1}; Flags: Fragment;102..116

MSSADSEVKTLNLFVNLAASSDIKAAALDKSAPCRRSVDHRKYLQKQLKRFSQKFSRVPRGQSLTSADYRC  
ARGAERKRAAATDQASSDAQHAQSDGGVMDQVPMRKRQLPASFWEEPRLTKARRDKPFLDLIRSSSSSEGGENEK  
RRRSQEDAQKTANSSFGRRSSAEKEVLKLDLTSRHSVSFSCCCPFQLQGQQLLHSQIVVPHPPFGLWSKAAEPQR  
PEHPHGQKLHTHVVVKPIPTKATAQSPVS PMRKRQLPASFWEEP

tr:A0A0S7FQL2\_9TELE [A0A0S7FQL2] SubName: Full=YAP1  
{ECO:0000313|EMBL:JAO19316.1}; 45..59

MDAHRGAPPAGQQIVHVRGDSKTELEALFNAVMPNSKATRQQSVPMRMRKFPDSFFKPPPEPRGHSRQAS  
SDGGVCGSLAPHVRAHSSPASLPVNSLSAQADADAAATPIIPDDVPLPEGWEMAKTSTGQRYFINHVHRTTTWQ  
DPRLSQLQSAQAQHQIACTPSHAHSFNSPAPTTQPKNIIPETGITLQCCTLFVVICLPLTWSVLGVVPLGFSLGC  
LH PMRMRKFPDSFFKPP

tr:A0A0S7F408\_9TELE [A0A0S7F408] SubName: Full=YAP1  
{ECO:0000313|EMBL:JAO09838.1}; Flags: Fragment;56..70

TSPLVLIWGNMDDPNQLNPPAGHQIVHVRGDSQTDLELLFNVMNPKTSNVPPSVPMRMRKLPDSFFKPP  
PEPKSHSRQASTDAGSGGVLTPHHVRAHSSPASLQLGAVSGGSLSGMASAGASPQHLRQSSYEIPDDVPLPSGWE  
MAKTSSGQRYFLNHNEKSTTWQDPRKSLLOMNQPPPPSSVPVQPQTILISPANGSLPEGWEQAITQEGEIYYINHT  
NKTTSWLDPRLPRYALNQRLTQSAPGKQSGQLPSSTHGGVMGNNQLRLQQIEKERLRLQVHRPQELALRNQL  
PTSMDQDGSTNPVSSPLAQDARTMTVNSSDPFLNSGTYHSRDESTDSGLSMSSYSVPRTPDFFLNSVDEMDTGPK  
RSQ PMRMRKLPDSFFKPP

tr:A0A0S7EM87\_9TELE [A0A0S7EM87] SubName: Full=YAP1  
{ECO:0000313|EMBL:JAO03874.1}; Flags: Fragment;45..59

MDAHRGAPPAGQQIVHVRGDSKTELEALFNAVMPNSKATRQQSVPMRMRKFPDSFFKPPPEPRGHSRQAS  
SDGGVCGSLAPHVRAHSSPASLPVNSLSAQADADAAATPIIPDDVPLPEGWEMAKTSTGQRYFINHVHRTTTWQ  
DPRLSQLQSAQAQHQIACTPSHAHSFNSPAPTTQPKNIIPETAPKVNPAITLTLAMQORLEKLRKQGIIPPQFVPQ  
VQEAGGSNQMPGGMDHDSRAQMLVPSVDIRIRALNQEPNLNGAHSRNESTDSGLSVSSLSRTSDHMLSSVDHMDT  
GIVPLLTTPNSLHFLRIFLLICSFLNA PMRMRKFPDSFFKPP

tr:A0A0S7F1Z1\_9TELE [A0A0S7F1Z1] SubName: Full=YAP1  
{ECO:0000313|EMBL:JAO09835.1}; Flags: Fragment;56..70

TSPLVLIWGNMDDPNQLNPPAGHQIVHVRGDSQTDLELLFNVMNPKTSNVPPSVPMRMRKLPDSFFKPP  
PEPKSHSRQASTDAGSGGVLTPHHVRAHSSPASLQLGAVSGGSLSGMASAGASPQHLRQSSYEIPDDVPLPSGWE  
MAKTSSGQRYFLNHNEKSTTWQDPRKSLLOMNQPPPPSSVPVQPQTILISPANGSLPEGWEQAITQEGEIYYINHT  
NKTTSWLDPRLPRYALNQRLTQSAPGKQSGQLPSSTHGGVMGNNQLRLQQIEKERLRLQVHRPQELALRNQL  
PTSMDQDGSTNPVSSPLAQDARTMTVNSSDPFLNSGTYHSRDESTDSGLSMSSYSVPRTPDFFLNSVDEMDTGEW  
YV PMRMRKLPDSFFKPP

tr:A0A0S7EXX9\_9TELE [A0A0S7EXX9] SubName: Full=YAP1  
{ECO:0000313|EMBL:JAO09841.1}; Flags: Fragment;56..70

TSPLVLIWGNMDDPNQLNPPAGHQIVHVRGDSQTDLELLFNVMNPKTSNVPPSVPMRMRKLPDSFFKPP  
PEPKSHSRQASTDAGSGGVLTPHHVRAHSSPASLQLGAVSGGSLSGMASAGASPQHLRQSSYEIPDDVPLPSGWE  
MAKTSSGQRYFLNHNEKSTTWQDPRKSLLOMNQPPPPSSVPVQPQTILISPANGSLPEGWEQAITQEGEIYYINHT  
NKTTSWLDPRLPRYALNQRLTQSAPGKQSGQLPSSTHGGVMGNNQLRLQQIEKERLRLQELALRNQLPTSMD  
QDGSTNPVSSPLAQDARTMTVNSSDPFLNSGTYHSRDESTDSGLSMSSYSVPRTPDFFLNSVDEMDTGEWYV  
PMRMRKLPDSFFKPP

tr:A0A0S7IV94\_9TELE [A0A0S7IV94] SubName: Full=F181A  
{ECO:0000313|EMBL:JAO56123.1}; 102..116  
MSSADSEVKTLLNFVNLIASSDIKAALDKSAPCRRSVDHRKYLQKQLKRFSQKFSRVPRGQSLTSADYRC  
ARGAERKRAAATDQASSDAQHAQSDGGVMDQVPMRKRQLPASFWEEPRLTKARRDKPFLDLIRSSSSSEGGENEK  
RRRSQEDAQKTANSSFGRRSSAEKEVLKLDLTSRHSVSFCSCCPFQLQGQQLLHSQIVVPHPPFGLWSKAAEPQR  
PEHPHGQKLHTHVVKPIPTKATAQSPIFSVFGFI PMRKRQLPASFWEEP

tr:A0A0S7MHU2\_9TELE [A0A0S7MHU2] SubName: Full=F181B  
{ECO:0000313|EMBL:JAP01008.1}; Flags: Fragment;196..210  
KLHEQHQQVFIHRTKSCFEETFSSGITVDATGVAAGLDRVMAVQTAIMNPQFMSFCFPDSVMEYDVEK  
SLDGSLCEAENDEDFKETTRDLSFIDSASSNIKLALDKPVKSKRKNHRKYLQKQIKRCTGIITPGNTSEAPV  
KRQGSFVSQQGPLQSKTLQKREGGQANLQSKSLAALFSPVKEIRGEKAKKPPMRHRNLPPSFFTEPANCSRVSST  
SGMTLTKDLERGNPEAADFFELLGPDYSNMVNEQDIYQGVPLRGQPDMMGGDPASYDHLVGGLLYTEPWTNCSGPS  
KKPSEGLRSGPPQPPVYSQAEDTSVPLDDNGLCTLFTFTSSQTAPYLRPMT PMRHRNLPPSFFTEP

tr:A0A0S7F5E5\_9TELE [A0A0S7F5E5] SubName: Full=YAP1  
{ECO:0000313|EMBL:JAO09837.1}; Flags: Fragment;56..70  
TSPLVLIWGNMDPNQLNPPAGHQIVHVRGDSQTDLELLFNSVMNPKTSNVPPSVPMRMRKLPDSFFKPP  
PEPKSHSRQASTDAGSGGVLTTPHHVRAHSSPASLQLGAVSGGSLSGMASAGASPOHLRQSSYEIPDDVPLPSGWE  
MAKTSSGQRYFLNHNEKSTTWQDPRKSLLOMNQPPPPSSVVPVQPTLISPANGSLPEGWEQAITQEGEIYYINHT  
NKTTSWLDRLEPRYALNQRLTQSAPGKQSGQLPSSTHGGVMGNNQLRLQOIEKERLRLQELALRNQLPTSMD  
QDGSTNPNVSSPLAQDARTMTVNSSDPFLNSGTYHSRDESTDSGLSMSSYSVPRTPDFFLNSVDEMDTGPKRSQ  
PMRMRKLPDSFFKPP

tr:A0A218V6B6\_9PASE [A0A218V6B6] SubName: Full=Protein **FAM181B**  
{ECO:0000313|EMBL:OWK61122.1}; 150..164  
MAVPAALLSPHLLSFCFPAAGGLGYADLEKGYEGGGDAGDFREATRDLLSFIDSASSNIKLALDRP  
IKRCTGIIAAAAPPPAACPPAACPARPPRREPAQAAGSSLQSRSLAALFGFLPRGRAAAGGAEPKAGGGEKAAG  
GPRKVPDRNLPPSFFTEPALPGPAARGPPAKEPEKGGGSAEAAEFFELLCEPEYGALLPEHAAATDAFGGRLPA  
ELGLEPGLYELPLPAGPHPLLGLLYPEPPWSPAAPCSPPRKAPAEPLRPIYPGGAEPVPGGGGSEEPGGHLPAG  
FAPFFPECPLPPPQPPYDYGGGYHRGGYPGL PLRDRNLPPSFFTEP

tr:A0A218U9Q2\_9PASE [A0A218U9Q2] SubName: Full=Uncharacterized protein  
{ECO:0000313|EMBL:OWK50230.1}; 171..185  
MAGRQRQGVIOPLAELRLPSFFPHGLLLPHTPEPDFDLSEEEEEEEEEEEEEEDVEAVEESVRPELAGV  
SSTAETTLRLRFLSELIQRYFGRRGREEAASSRPVQDCGSPPSAEAVPEAPRGSFGATHRLGPLAELEFEY  
GVHRCLPARAAGGKTQRLERKYGHITPMHRRKLPPSFWKEPGPGPASLLHSGTPDFSDLLANWTVEPGPELPGAG  
RELLGRPGLEAEPFAGL PMHRRKLPPSFWKEP

tr:A0A218UEN4\_9PASE [A0A218UEN4] SubName: Full=Protein **FAM181A**  
{ECO:0000313|EMBL:OWK52237.1}; 172..186  
MVILMWGQLKAALPGAACALSKCRGCQVQVQVWLGCCTGCPVRRRCRQHREMASDSEVKTLLNFVNLIAS  
SDIKAALDKSAPCRRSVDHRKYLQKQLKRFSQKYSRI PRCHPSKAPECGWRRGAEDRARGPQPEAPEPSPHKVVQ  
TAEAEESLTGERVLQEQKPEAARPDQVPMRKRQLPASFWEEP RPAQSLAARAFASPEGLQAPRDPPEYEGKSK  
RSPDAAGPESPPDSAPHAGEKEPAGPLSGRVGAWTCCPFPCPGVYQPPGALPPSFFPGLGLWRKSAATLPAEV  
PHFCKEADGQKLYRPMVLKPIPTKPAIPPLFNVFGYL PMRKRQLPASFWEEP

tr:A0A091LX75\_CARIC [A0A091LX75] SubName: Full=Protein **FAM181A**  
{ECO:0000313|EMBL:KFP62949.1}; 110..124  
MASDSEVKTLLNFVNLIASSDIKAALDKSAPCRRSVDHRKYLQKQLKRFSQKYSRI PRCHPSKTPECGWG  
PPGGGPATEKVLQTAEEEDSLSERVLQEQNPEAARPDQVPMRKRQLPASFWEEP RPAQSLPARAFPTIPEGLPA  
PRDPPPEYAKKSKQSLDAVGPEPPEPVPHAGEKDPAGVLSGRVGAWTCCPFPCPGVYQPPGALPPSFFPGLG  
LWRKSAALPAEVPFRFCKEADGTGQKLYRPVVLKPIPTKPAIPPIFNVFGYLPMRKRQLPASFWEEP

tr:A0A091UR35\_NIPNI [A0A091UR35] SubName: Full=Uncharacterized protein  
{ECO:0000313|EMBL:KFQ93176.1}; Flags: Fragment;60..74  
SPQCAEAQPEAVAPRGSFGAMHRLGPLAELEFEYGVHRCLPPRAAGGKTQRLERKYGHITPMHRRKLPPS  
FWREPGPGPAGLLHAGTPDFSDLLANWTVEPGPELPGTGRELPPPEPDRPGLEAEPFAG PMHRRKLPPSFWREP

tr:A0A093PGK4\_9PASS [A0A093PGK4] SubName: Full=Protein **FAM181A**  
{ECO:0000313|EMBL:KFW76013.1}; Flags: Fragment;80..94  
FAQKYSRMPRCHPSKPPECGWRRGAEDRGRGPQLEAPDPSPHGGAATEKVMQTAEAEETLTGERVLQEQ  
KPEAVRPDQVPMRKRQLPASFWEEPRAQNLRTARAFPASPEGLPAPRDPYEGKSKWSPDAAGPESPPDPAPH  
AGEKDPAGVLSGRVGAWTCCPFPCPGTGVYQPPGALPPSPFPGLGLWRKSAATLPAEVPHFCKEADGTGQKLYRP  
MVLKPIPTKPTIPPPPIFNVFGYL PMRKRQLPASFWEEP

tr:W5N5Z2\_LEPOC [W5N5Z2] SubName: Full=Family with sequence similarity  
181 member A {ECO:0000313|Ensembl:ENSLOCP00000016051}; 90..104  
MACTDSEVKTLNLFVNLAASDIKAALDKSAPCRRYSRIPRCQSYRTSESGIGKALEDKSGTYPLETVNR  
NLSLAHLSEKIGSDLRQDQVPMRKRQLPASFWEEPSSKSKHETFPQAVWRKNQAVGGSGLSGSVEQIRKKCEGP  
KTTSVHINRQSVAEKEPLTVEMTSLTGSASLCGCCPFQYHGQHVYQSHVVLPQSGFSDSSMWGKPSVAQTEGLDS  
CKDVAINGQKSHTHVVKPIPTKPTVPSPIFSVFGFI PMRKRQLPASFWEEP

tr:A0A3L8SGS6\_CHLGU [A0A3L8SGS6] SubName: Full=Uncharacterized protein  
{ECO:0000313|EMBL:RLW01486.1}; 170..184  
MAAGVIQPLAELRLPSPFPHGLLLPHTPEPDIPDLSEEEEEEEEEEEEEEDVEAVEESERPELASVSST  
AETTLRLLLKFSELISCDIQRIFYGRRGEEAASSHPVQDCGSPQSAEAVPEVVAPRGSPTHTQLGFLAELFEYG  
VHRCLPARAAGGKTQRLERKYGHITPMHRRKLPSPFWKEPGPGPASLLHTGTPDFSDLLANWTVPEPPELPGTGR  
ELLGRPGLEAEFPAGL PMHRRKLPSPFWKEP

tr:A0A226MJJ1\_CALSU [A0A226MJJ1] SubName: Full=Uncharacterized protein  
{ECO:0000313|EMBL:OXB55378.1}; 160..174  
MAVPAALLSPHLLSFCFPAGGLLGYADLEKGYEGGGGGGGGDFKEATRDLDSFIDSASSNIKLALD  
KPVKSKRKNVNRKYLQKQIKRGTGIIAPPPAAPPPAPCPKPPPPRRDGSQAGSSLQSRSLAALFGSLRPGRGS  
GSDGGGAAGGGPRKVLDRNLPPSFFTEPGAKEAEKAGGQEAADFLELLGPEYGALLPEHACPPRDAFPAARPP  
AELGMEHGMYEAAAPHLLGLPYPEPPWSPGPGPCSPAKKAPSEALRPLYPEPSVGGDAFGPFFPECPLQPYEYG  
AGFHRAAYTGL PLRDRNLPPSFFTEP

tr:A0A226MRB7\_CALSU [A0A226MRB7] SubName: Full=Uncharacterized protein  
{ECO:0000313|EMBL:OXB57873.1}; 85..99  
MDPGQPQPQPQAAPQPAPQQAAPQPPGAVS GAPGGAQPPGAGPPPAGHQIVHVRGDSETDLEALF  
NAVMNPKGANVPHTLPMRLRKL PDSFFKPEPKAHSRQASTDAGTAGALTPQHVRHSSPASLQLGAVSPGTLTP  
SGVVTGPGAPSSQHLRQSSFEIPDDVPLPPGWEMAKTPSGQRYFLNLDNTHAELYLAIALALITLALCWENDGD  
QSKGSENMSHIDQTTTWDPRKAMLSQMNVTAPTSPVQNLNMSASAMNQRISQSAPVKQPPPLAPQSPQGGVM  
GGSSSNQQQQMRLQQLQMEKERLRLKHQELLRQAMRNPSTANSPKHQELALRSQLPTMEQDGGSQNPVSSPGMSQ  
ELRTMTTNSSDPFLNSGTYHSRDESTDSGLSMSSYSVPRTPDDFLNSVDEMDTGDSISQSNIPSHQNRFPDYLEA  
IPGTNVDLGTLEGDGMNIEGELMPSLQEQALSSDILNDMESVLAATKLDKESFLTWL PMRLRKL PDSFFKPP

tr:A0A226NKW2\_CALSU [A0A226NKW2] SubName: Full=Uncharacterized protein  
{ECO:0000313|EMBL:OXB68018.1}; 127..141  
MASDSEVKTLNLFVNLAASDIKAALDKSAPCRRSVDHRKYLQKQLKRFSQKYSRVPRCHATKPLECGPR  
RGAEDRRASCQPEVDPDPGPHSGAATEKVLQAAEAESLAGEQAVPEQNPEASRPDLVPMRKRQLPASFWEEPRA  
QSI PARGFPLGTEGLVPRDPPPFEGKSKRSQDAAGPESHEPALHAGEKDPTSVLSGRVGAWTCCPFPCGPV  
YQPPGTLPPSPFPGLGLWRKDAASLPAEAQPF SKEAEGTGQKLYRPVVLKPIPTKPTIPPPPIFNVFGYL  
PMRKRQLPASFWEEP

tr:A0A151P7M0\_ALLMI [A0A151P7M0] SubName: Full=Transcriptional  
coactivator YAP1 isoform B {ECO:0000313|EMBL:KYO44970.1}; 13..27  
MNPKGANVPHTLPMRLRKL PDSFFKPEPKAHSRQASTDAGSAGALTPQHVRHSSPASLQLGAVSPGT  
LTPSGVVTGPGPASSQHLRQSSFEIPDDVPLPPGWEMAKTPSGQRYFLNHIDQTTTWDPRKAMLSQMNVTAPT  
SPPVQPNIMNSASAMNPRITQSAPVKQPPSLAPQSPQGGVMGSGNSNQQQQMRLQQLQMEKERLRLKHQELLRQ  
LRNINPSTANSPKHQELALRSQLPTMEQDSSGNSQNPVSSPGMSQELRTMTTNSSDPFLNSGTYHSRDESTDSGLSM  
SSYSVPRTPDDFLNSVDEMDTGDSISQSNIPSHQNRFPDYLEAIPGTNVDLGTLEGDGMNIEGELMPSLQEQALS  
SDILNDMESVLAATKLDKESFLTWL PMRLRKL PDSFFKPP

tr:A0A151NHH5\_ALLMI [A0A151NHH5] SubName: Full=Uncharacterized protein  
{ECO:0000313|EMBL:KYO35955.1}; 130..144  
MTLQLLRFSELISSDIQRIFYGRKDKEEDPDSCNIYEDCFSPQRSGRELYYADLMHIAQSGELDDEDSHS

AQVPLGQLDQQVWRSICNKDGGQKLGPLAELFEYGLRQYIKQTVSDSRRLRLEKKYAHITPMHRRKLPSPFWKEP  
SPGPAGILNTNTPDFSDLLANWTVEPGQELPNASRELAGELGRQAMEADQFNVL PMHRRKLPSPFWKEP

tr:A0A151P7T5\_ALLMI [A0A151P7T5] SubName: Full=Transcriptional  
coactivator YAP1 isoform A {ECO:0000313|EMBL:KYO44969.1}; 13..27

MNPKGANVPHTLPMRLRKLKLPDSFFKPPPEPKAHSRQASTDAGSAGALTPQHVRHSSPASLQLGAVSPGT  
LTPSGVVTGPGPASSQHLRQSSFEIPDDVPLPPGWEMAKTPSGQRYFLNHIDQTTTWQDPRKAMLSQMNVTAPT  
SPPVQPNIMNSASGPLPDGWEQAMTQDGEIYYINHNKTTSWLDPRLDPRFAMNPRITQSAPVKQPPSLAPQSPQ  
GGVMGSGNSNQQQMRLQQLQMEKERLRLKHQELLRQALRNINPSTANSPKHQELALRSQLPTMEQDSGSQNPVS  
SPGMSQELRTMTTNSSDPFLNSGTYHSRDESTDSGLSMSSYSVPRTPDDFLNSVDEMDTGDSISQSNIPSHQNR  
PDYLEAIPGTNVDLGTLEGDMNIEGEEELMPSLQEQALSSDILNDMESVLAATKLDKESFLTWL  
PMRLRKLKLPDSFFKPP

tr:A0A091GQR5\_BUCRH [A0A091GQR5] SubName: Full=Protein **FAM181A**  
{ECO:0000313|EMBL:KFO85936.1}; 124..138

MASDSEVKTLNLFVNLAASSDIKAALDKSAPCRRSVDHRKYLQKQLKRFSQKYSRIPRCHSSKPSKPECGWR  
RDRGRGPQPETPDPGPHGGAAAEKVLQTSVEVEESLTGERVLQEQNPEAARPDQVPMRKRQLPASFWEEP  
PAGAFPTSPGFPAPRDPHPHYEGKSKRSRPGAASPEPPEVPHAREKDPARVLSGRVGAWTCCPFPCPGVYQ  
PPGALPPSPFPGLGLWRKSVATLPAEGPRFCKEAEAGAGQKLFPRPVVLPKPIPTNPAVPPPIFNVFGYL  
PMRKRQLPASFWEEP

tr:A0A2I0TS16\_LIMLA [A0A2I0TS16] SubName: Full=Sentrin-specific  
protease 3-like {ECO:0000313|EMBL:PKU36598.1}; 166..180

MAAGIIRPLAELRLPSPFPHSLLLPTRPEPDPDLSEEEEEEEEEEEDEEEVAEESVKPELAVPSAAETT  
LRLKLFSELISCDIQRYFGRQGEATGSHGVPEDCGSPRHAEGQPEAVAPRGSFGATHRLGPLAELFEYGVHRC  
LPPRAAGGKTQRLERKYGHITPMHRRKLPSPFWREPAPVPTGLLHTGTDPDFSDLLANWTVEPGPELPGTGRELPP  
EPGHPGLEAEPFAGL PMHRRKLPSPFWREP

tr:A0A2I0UHA0\_LIMLA [A0A2I0UHA0] SubName: Full=Uncharacterized protein  
{ECO:0000313|EMBL:PKU45414.1}; 127..141

MASDSEVKTLNLFVNLAASSDIKAALDKSAPCRRSVDHRKYLQKQLKRFSQKYSRIPRCHPSKAPESGWR  
RVVEDRGRGPQPELDPSPHGGAVTEKVLRTGEAEESLAGEGVLQEQNPEAARPDQVPMRKRQLPASFWEEP  
PSLPARAFPAGIEGLPAPRDPHPYEGKSKRSSDTASPEPPEPAPHAGDKEPAGVLSGRVGAWTCCPFPCPGP  
VYQAPGALAPSPFPGLGLWRKSVAAALPGEVPHFCKEADGMGQKLYRPMVLKPIPTKPAVPPPIFNVFGYL  
PMRKRQLPASFWEEP

tr:A0A3B3WPM6\_9TELE [A0A3B3WPM6] SubName: Full=Yes-associated protein 1  
{ECO:0000313|Ensembl:ENSPMEP00000004758}; 45..59

MDPNQHNPAGHQIVHVRGDSQTDLELLFNVSVMNPKSSNPVSLPMRMRNLKLPDSFFKPPPEPKSHSRQAS  
TDAGSGGVLTPHHVRHSSPASLQLGAVSGGSLSGMASAGASQHLRQSSYEIPDDVPLPAGWEMAKTTSGQRYF  
LNYLKLINLKLIFAYKCLGRYNTESLIATYANLVSVLVCNPPGPLEPHWEQAITSEGEIYYINHEKRTTSWLD  
EPRYALNQQRMTQSAPGKQSQQLPSTLGGVMAGNNQLRLQIQEKDRLRLQHRPQVSHQFGLGAFISEGGDGRG  
TFPFCIRFMCKRQSPKIKEIGTDLIVGTSEVMNKKPTVVTKIT PMRMRNLKLPDSFFKPP

tr:A0A3B3WZA6\_9TELE [A0A3B3WZA6] SubName: Full=Family with sequence  
similarity 181 member B {ECO:0000313|Ensembl:ENSPMEP00000008073};  
155..169

MAVQTAIMNPQFMSFCFPDSVMEYDVEKSLDGSLLCEAENDEDFKETTRDLLSFIDSASSNIKLALDKP  
VKSKRKNVHRKYLQKQIKRGTGIIITPGNTSEAPVKRQGSFVSQQGPLQSKTLQKREGGQANLQSKSLAALFSPVK  
EIRGEKAKKPPMRHRNLPPSFFTEPANCSRVSSTSGMTLKDRLERGNPEAADFFELLGPDYSNMVNEQDIYQGVPL  
RGQPDGLGDPASYDHLVGGLLYTEPWTNCSGPKKPESEGLRTGPPQPPVYSQAEDTSVPLDDNGLCTLTFFPNFF  
PDCSISQVTYDLNDGSNNPSGHIDSHTN PMRHRNLPPSFFTEP

tr:A0A3B3Y9M5\_9TELE [A0A3B3Y9M5] SubName: Full=Yes-associated protein 1  
{ECO:0000313|Ensembl:ENSPMEP00000024061}; 45..59

MDPNQHNPAGHQIVHVRGDSQTDLELLFNVSVMNPKSSNPVSLPMRMRNLKLPDSFFKPPPEPKSHSRQAS  
TDAGSGGVLTPHHVRHSSPASLQLGAVSGGSLSGMASAGASQHLRQSSYEIPDDVPLPAGWEMAKTTSGQRYF  
LNHNKSTTWQDPRKALLQTSQPAPSSVPPVPPQNLMPNANGPLPEHWEQAITSEGEIYYINHEKRTTSWLD  
PRL

EPRYALNQQRMTQSAPGKQSGQLPPSTLGGVMAGNNQLRLQOIEKDRLRLQQHRPQVSHQFGLGAFISEGGDGRG  
TFPFFSQRLILVLPSSSNRKRDFRCWMESMPCQSN PMRMRNLPSDFFKPP

tr:A0A3B3WPN1\_9TELE [A0A3B3WPN1] SubName: Full=Yes-associated protein 1  
{ECO:0000313|Ensembl:ENSPMEP00000004763}; 45..59

MDPNQHNPPAGHQIVHVRGDSQTDLELLFNFSVMNPKSSNPASLPMRMRNLPSDFFKPPEPKSHSRQAS  
TDAGSGGVLTPHHVRAHSSPASLQLGAVSGGSLSGMASAGASPOHLRQSSYEIPDDVPLPAGWEMAKTTSGQRYF  
LNHNNDKSTTWQDPRKALLQTSQPAPPSSVPVPPQNLMPNANGPLPEHWEQAITSEGEIYYINHEKRTTSLWDPRL  
EPRYALNQQRMTQSAPGKQSGQLPPSTLGGVMAGNNQLRLQOIEKDRLRLQQHRPQVSHQFGLGAFISEGGDGRG  
TFPFCIRFMCKRQSPKIKEIGTDLIVGTSEVMNKKPTVVTKIT PMRMRNLPSDFFKPP

tr:A0A091K654\_COLST [A0A091K654] SubName: Full=Protein **FAM181A**  
{ECO:0000313|EMBL:KFP32510.1}; 108..122

MASDSEVKTLNLFVNLASSDIKAALDKSAPCRRSVDHRKYLQKQLKGGWRRGAEERGRGPQPEAPDPGP  
HGRAAAEKVLQAGEAEETLARERVLQEQNPEASRPDQVPMRKRQLPASFWEEP RPVQSLPARVFPEGLPSPRDPL  
LYEGKSKRSPDIAGPESSPEPSSHAGEKDPAEVLSRVGSWTCCPFPCPGVYQPPGALPPAPFPGLGLWTKS  
AALLPAEVPFHCKEADSVGQKLYRPVVLKPIPTKPTIPSPIFNVFGYL PMRKRQLPASFWEEP

tr:A0A3B4Y209\_SERLL [A0A3B4Y209] SubName: Full=Uncharacterized protein  
{ECO:0000313|Ensembl:ENSSLDLP00000021918}; 46..60

MDAHRGAPPAGQQIVHVRGDSQTELEALFSAVMNPASKATRQPASLPMRMRKLPDSFFRQPDPRGHSRQA  
SSDGGVCGSLTPHHVRAHSSPASLPDVGQILLFTLSTPCTPSTSLTVYFHCCSGPLPEGWEQAVTADGEVYYIDH  
INKTTAWVAPRLGKTFCSNVHHKLLFSNKNKDRKSFDFNFCYSMLLKCFTFWKYLLNGQKGLFSMFMFPAQK  
MNPGLGLALQQRQEKERLRCKGLPPQITPQDQELRNIFVRVFLCSAHSRNESTDSGLSVSSLPRTSDHMLSSVD  
HMDTGDSGDNSMTLQESMPVLPMSSEGEELMPCIPPEGLSSDLLMDMETVLSGSHMDRDSLLTWL  
PMRMRKLPDSFFRQP

tr:A0A146RFW2\_FUNHE [A0A146RFW2] SubName: Full=Uncharacterized protein  
{ECO:0000313|EMBL:JAQ66927.1}; 204..218

MAVQTAIMNPQFMSFCFPDSVMEYDVEKSLDGSLLCEAENDEDFKETTRDLSFIDSASSNIKLALDKP  
VKSKRKNVHRKYLQKQIKRCTGIITPGNTSEAPVKRQSSPVSQQGPLQSKNLKRKNVHRKYLQKQIKRCTGIITP  
GNTSETPVKRQSSPVSQQGPLQSKNLQKREGGQANLQSKSLAALFSPEKEIRGEKAKKPLRHRNLPPSFFTEPA  
NCSRVSSTSGMTLKDRLERGNPEAAEFFELLGPDYSNMVTEQDVYQGVSPRVQPDLGGLDSTSYDHLVSGLLYPEP  
WTNCLGPKKPGDGLRTGPPQPPVYGQAEDPSGPLDDSGLCTLAFFPNFFPDCSIPQAAAYDLNGGYSKTSYSCL  
PLRHRNLPPSFFTEP

tr:A0A146Y1A6\_FUNHE [A0A146Y1A6] SubName: Full=Transcriptional  
coactivator YAP1 {ECO:0000313|EMBL:JAR47983.1}; 46..60

MDAHRGAPPAGQQVVHVRGDSKTELEALFNAVMPGKAARQPHSLPMRMRKLPDSFFKPPPEPRGHSRQA  
SLDGGGLCGSLAPHHVRAHSSPASLPVNSLSAQADADAAATPIIPDDVPLPDGWEMAKTPTGQRYFINHVHKT  
QDPRLSQLQSAQAQHQIACPIHAHSFSNPAPTTQPKNIIPETAQKVN PANLGLAMQQRQEKLRKHSILPQFVP  
QESGGSNQMPGGMDHRTAQMLVPSVDVIRALKQEPNLNGAHSRNESTDSGLSVSSLPRTSDHMLSSVDHMDTG  
DSSEPPSMSLQESMPVLPMDDELMPGIPDGLTSDILMDMDTVLSGSHMDRDSLLTWL PMRMRKLPDSFFKPP

tr:A0A146NMN4\_FUNHE [A0A146NMN4] SubName: Full=Transcriptional  
coactivator YAP1 {ECO:0000313|EMBL:JAQ32692.1}; 45..59

MDPNQHNPPAGHQIIVHVRGDSQTDLELLFNFSVMNPKNSNPASLPMRMRKLPDSFFKPPPEPKSHSRQAS  
TDAGSGGVLTXXXXXXXXXXXXXXXXXXXXXXXXXXXXXXXXXQASTDAGSGGVLTPHHVRAHSSPASLQLGAVSGGSL  
SGMASAGASPOHLRQSSYEIPDDMPLPAGWEMAKTHSGQRYFLNHIDKTTTWQDPRKSLLOMNQAPAPPSSVPVPPQ  
QNLMPNANGALPEGWEQAITPEGEIYYINHNKNTTSLWDPRYAQNQQRITQSAPVKQSGQLPPSTHGGVMGGNNQ  
LRLPQIEKERLRLQQHRPQELAVRXXXXXXXXXXXXXXXXXXXXXXXXXXXXXXXXXLRQLQQHRPQELAVRNQLPTSM  
QDGSTNPVSSPLAQDARTMTVNSSDPFLNSGTYHSRDESTDSGLSMSSYSVPRTPDFFLNSVDEMDTGDPPLPSI  
ATQPNRFPDYLDIAIPGTDVDLGTLESESMVVEGEELMASLQEPSSDILSDMESVLAATKIDKENFLT  
PMRMRKLPDSFFKPP

tr:A0A146S711\_FUNHE [A0A146S711] SubName: Full=Uncharacterized protein  
{ECO:0000313|EMBL:JAQ76422.1}; Flags: Fragment; 215..229

RPLSTDKHLPTPNLDCLWKLHERDQEQVFICGRKSCSEETLSSRITVDATGVAAGLDRVMAVQTAIMN  
PQFMSFCFPDSVMEYDVEKSLDGSLLCEAENDEDFKETTRDLSFIDSASSNIKLALDKPVKSKRKNVHRKYLQK



QIKRCTGIITPGNTSEAPVKRQSSPVSQQGPLQSKNLQKREGGQANLQSKSLAALFSPEKEIRGEKAKKPPLRHR  
NLPPSFFTEPANCSRVSSSTSGMTLKDLEGRNPEAAEFFELLGPDYSNMVTEQDVYQGVSPRVQPDGLGGLDSTSYD  
HLVSGLLYEPWNTCLGPCKKPGDGLRTGPPQPPVYQQAEDPSGPLDDSGLCTLAFFNFFPDCSIPQAAYDLNGG  
YSKTSYSCL PLRHRNLPPSFFTEP

tr:A0A147ARY4\_FUNHE [A0A147ARY4] SubName: Full=Protein **FAM181A**  
{ECO:0000313|EMBL:JAR81187.1}; Flags: Fragment; 90..104

VNLASSDIKAALDKSAPCRRSVDHRKYLQKQLKRFQKFSRVPRCQTLRSADYRCARAAGAERQSAAVV  
DEAGSDAQHAQNVGGVTEQVPMRKRQLPASFWEEPRLTKTKRDKSCLDLRRSSSGTSEGTENEKRRRSQDDALKT  
AIISSSSRRSSADKDXXXXXXXXXXXXXXXXXXXXXXXXXXXXXXXXXXXXXXXXXXXXXXXXXXXXXXXXXXXXXR  
TSHHSVSFCGCWPFQFHGNQVLHSQIVVPHPPVSLWSKAAGPEPERPEHPYQQLHPTHVVKPIPTKPTAQSPIF  
SVFGFI PMRKRQLPASFWEEP

tr:A0A1L8HJ61\_XENLA [A0A1L8HJ61] SubName: Full=Uncharacterized protein  
{ECO:0000313|EMBL:OCT96130.1}; 54..68

MEPGSQQQPSAPAQQPPPVGHQVHVVRTDSETDLEALFNAMNPKNANLPQTLPMRMRKLPDSFFKQFPQ  
PEAKSHSRQASTDGGGAGALTPQHVRHSSPASLQLAAVSPGALSPQGVVVTGLAPPSAPHLRQSSYEIPDDVPLP  
PGWEMAKTPSGQRYFLNHIDQTTTWDPRKAMLSQINVTAPTSPPVQQNIMTPTGFLPDGWEQALTPGEYAFIN  
HKNKSTSWLDRPLDPRFAMNQRLSQNAPVKAPPALPPPSPQTVLGSQGNQMQRLQQLQMEKERLRLKHQELLR  
QVRPQELALRSQIIPMEQDGGTQNPVCTTGISQELRTMTMNSSDPFLNSGTYHSRDESTDSGLSMSSYSVPRTPD  
DFLNSVDEMMDTGEAITQSTIPTQNRFPDYLETLPGTNVDLGTLEGEAMNVEGEELMPSLQEQALSSDILNDMETV  
LAATKLDKESFLTWL PMRMRKLPDSFFKQP

tr:A0A1L8HAV2\_XENLA [A0A1L8HAV2] SubName: Full=Uncharacterized protein  
{ECO:0000313|EMBL:OCT93186.1}; 54..68

MEPGSQQQPSAPGQQPPPVGHQIVHVVRTDSETDLEALFNAMNPKNANVPQTLPMRMRKLPDSFFKQFPE  
PKSHSRHVDQTTTWDPRKAMLSQINVTAPTSPPVQQNIMTPTAMNQRLSQSAPVKSPALQPPSPSGVLGSG  
GNQQMRLQQLQMEKERLRLKHQELLRQVRPQELALRSQIIPMEQDQSGPPNPVCSSGISQELRTMTMNSSDPFLNS  
GTYHSRDESTDSGLSMSSYSVPRTPDDFLNSVDEMMDTGEAITQSTIPTQNRFPDYLETLPGTNVDLGTLEGEAM  
NVEGEELMPSLQEQALSSDILNDMETVLAATKLDKESFLTWL PMRMRKLPDSFFKQP

tr:A0A147AQR8\_FUNHE [A0A147AQR8] SubName: Full=Transcriptional  
coactivator YAP1 {ECO:0000313|EMBL:JAR80920.1}; Flags: Fragment; 126..140

RSSRPLSCVRALPRLVKRVFCTPCREKRDGTGLFFFFFLLWPPFPAGIHRGGGGAAAGGGGGGTLWLL  
EDLFRQLTGLDMDAHRGAPPAGQQVHVVRGDSKTELEALFNAMNPGKAARQPHSLPMRMRKLPDSFFKPPPEPRG  
HSRQASSDGGLCGLSAPHVRAHSSPASLPVNSLSAQADADAAATPIIPDDVPLPDGWEAKTPTGQRYFINHVH  
KTTTWDPRLSQLQSAQAQHQIACTPIHAHSFSNPAPTTPQPKNIIPETGPLEGWEQAVTADGEMYYIDHINKTT  
TWDDPRLAQKVNPNANLGLAMQQRQEKRLRLKHSILPQFVPPQESGGSNQMPGMDHRTAQMLVPSVDVIRALKQE  
PNLNGAHSRNESTDSGLSVSSLPRTSDHMLSSVDHMDTGDSSSEPPSMSLQESMPVLPMDDELMPGIPDGLTSDIL  
MDMDTVLSGSHMDRDSLTLWL PMRMRKLPDSFFKPP

tr:A0A1L8HB22\_XENLA [A0A1L8HB22] SubName: Full=Uncharacterized protein  
{ECO:0000313|EMBL:OCT93300.1}; 151..165

MNHQFLSLYIPGSIVDYEKRYQEGVDYLGAVESGDFKETTKDLFSINTASSNIKLALDKPGKSKRKVN  
HRKYLQKQIKRCTGLMGSNINQSGPKRSPTSPGNSSMTPSGFPWKPPTKRSTQSNLQSKSLAALFDNVKEIRD  
ERCKKVPLRNRNLPPSFFTEPEPSCSGLLSNSGVALRDLGKCNQETLELFDLGLSDYNNMSEQEI IQGASVRLHQ  
DVSVEQSLYEPHLLNGLFYSDMWNPCNQVKKSSVGTGNLGLNETLKSAPLQALYTNNDPTMDSTMDDESCPSL  
TTYTPCFPSPDCSLPQIFDYDNTQNCNRI SYPVM PLRNRNLPPSFFTEP

tr:A0A3B5KEE0\_TAKRU [A0A3B5KEE0] SubName: Full=Uncharacterized protein  
{ECO:0000313|Ensembl:ENSTRUP00000053746}; 155..169

MLTLISDSEAAFKWLSFDFRARGPVFFPQSIKSPRCYGSKQTRKDTKVQKGGCWGGGGVVGTEIVNK  
SDQNRSA PASTSNAPRLCALLVSFCVSKLRFLAATPNFGDMAHAGAPPAGQQIVHVVRGDSQTELEALFSAMNPN  
SKASRQPPSLPMRMRKLPDSFFRQPDSRGHSRQASSDGGVCSSSLTPHHIRAHSSPASLPVNSLSAQAPDVAAAPI  
IPDDVPLPHGWEMAKTPTGQRYFLNHLDKTTTTWHDPRIAQLQSAQAQRPIAGTVPVHTHSLNPAQPATQPQNNMS  
PETGPLEGWEQAVTADGEVYYIDHINKTTTTWVDPRLAQKMNPNILGLSLQQRQEKERMRRQQGLPPQLPPQEEAA  
GRNQVSGGLDHRNTQMLVPPLDVRIRAPNHEPTLNGAHSRNESTDSGLSVSSLPRTSDHMLSSVDHMDTGDSDG  
ASSMTLQESMPVLPMSSEGEELIPCIPEGLGSDLLMDMETVLSGSHMDRDSLTLWL PMRMRKLPDSFFRQP

tr:H2UEB8\_TAKRU [H2UEB8] SubName: Full=Family with sequence similarity  
181 member B {ECO:0000313|Ensembl:ENSTRUP00000035287}; 155..169

MAVQTAIMNPQFMNFAPFGSVMGYDMEKGLDEGLLCEADNEEDYRETTRDLLSFMDSSASSNIKLALDKP  
VKSKRKNVHRKYLQKQIKRCTGIITPGNVAEAPVKRQVSPLTQSSPLQSKTTPPKREGIQASLQSKSLAALFSPVK  
DVRGEKTKKPLRHRNLPPSFFTEPVSCSKVSSTSGMTRLRLERANPETADFFDLLGPDYSSMVSEQDLYQGIPL  
RVQPDGLGDPACYDTHHLVGGLLYPEPWTSCSDTSKKAGSGPRSGPHQLPAYCPSDPCGPMEDHSLCTLAFPNL  
FTDCSTPQVTYDLNGASEQTLHTEGIWIFCP PLRHRNLPPSFFTEP

tr:A0A3P8VK80\_CYNSE [A0A3P8VK80] SubName: Full=Uncharacterized protein  
{ECO:0000313|Ensembl:ENSCSEP00000015683}; 46..60

MDAHRGAPPAGQQVVHVRGDSQTELEALFSAVMNPNAKAVRQPASLPMRMRKLPDSFFRQPDPRGHSRQA  
SSDGGVCGTTLPHHVRHSSPASLPVNSLSTQTADVAATPIIPDDVPLPHGWEMAKTSTGQRYFLNHHDKTTTWH  
DPRLSQLQSPAAQHPIAGPPLHAHSLSNPAQTTOQQNINPETGPLPEGWEQAVTADGEVYIDHINKSTTWVDP  
LAQNMNPGILGMVMQQRQEKERLRCKQGHPQAAPQEVGGRNQMSGGIDHDRNSQTLVPNLDVIRIRSSNHEPTLN  
GAHSRNESTDSGLSVSSLPRTSDHMLSSVDHMDTGDSDGENSSITLQESMPVMPMSEGEDELMPCIPEGLSSDLLMD  
METVLSGSHMERDSSLTTLW PLRMRKLPDSFFRQP

tr:A0A3P8V3D9\_CYNSE [A0A3P8V3D9] SubName: Full=Family with sequence  
similarity 181 member B {ECO:0000313|Ensembl:ENSCSEP00000008629};  
155..169

MAVQTAIMNPQFMNFCFPGSVMYDVKSLDGSLLGEAENDEYKETTDRLLNFIDSASSNIKLALDKP  
VKSKRKNVHRKYLQKQIKRCTGIITPGTGAEPGKRGQSPLAQPSPLQNKTLPKRDGVQANLQSKSLAALFSPAK  
EIRGEKAKKPLRHRNLPPSFFTEPANCSKVSSTSGMTRLKDLERGNPEAVEFFELLGPDYSNMVSDQDLYPNSSL  
RLQPEMGTLDPACYDSHHLVGGLLYSEPWTSCSGPSKNLRASPAQPPVYCQSEAAAAAAAAAAGNMDDNALCTLTF  
PNFFTDCSIQVQTYDLNGETDDAVETRLPGENMEPQN PLRHRNLPPSFFTEP

gp:AK141493\_1 [AK141493] Mus musculus 12 days embryo spinal cord cDNA,  
RIKEN full-length enriched library, clone:C530038J03 product:hypothetical  
Alanine-rich region profile containing protein, full insert sequence. [Mus  
musculus] 128..142

KRKNVHRKYLQKQIKRCSGLMGTAPPRPASPSAADAPAKRPPGAPTVAATPAHCKAAPRREATQAAAAAS  
LQSRSLAALFDSLRLHIPGGAETAGGAEAVSVPLGAASAVGDGAGTAVSSVAPGTRKRVPLRARNLPPSFFTEPSR  
VCGGASGVPSPGQVSLDLEKGAEAFFELLAPDFGSGNDSGVLMAADPLDFFPAGATVLRGPLELESQPFPEQ  
PAMVGNLLYEPWNTSPSPQTKKPPVAGVRRGVTLNPEVRLLYPTALDSPGGEDAPALSSFTFFFDPCALPPPHQ  
VSYDYSAGYSRAVYPSLWRPDGVWEGASGEEGGHPD PLRARNLPPSFFTEP

gp:BT029961\_1 [BT029961] IP17673p [Drosophila melanogaster] 88..102

MCACLIAKIILCSFRLYTISAFYMLTTMSASSNTNSLIEKEIDDEDMLSPIKSNLNVVRVNDTDDNLQ  
ALFDSVLNPGDAKRPLQLPLRMRKLPNSFFTPPAPSHSRANSADSTYDAGSQSSINIGNKASIVQQPDGQSPIAA  
IPQLQIQPSPQHSRLAIHHSRARSPPASLQQNYNVRARSDAAAANNPNANPSSQQQPAGPTFFPNSAQEFPSGAP  
ASSAIDLAMNTCMSQDIPMSMQTVHKKQRSYDVISPQLNRQLGALPPGWEQAKTNDGQIYYLNHTTKSTQWED  
PRIQYRQQQILMAERIKQNDVLQTTKQTTTSTC PLRMRKLPNSFFTPP

gp:BT029965\_1 [BT029965] IP17873p [Drosophila melanogaster] 88..102

MCACLIAKIILCSFRLYTISAFYMLTTMSASSNTNSLIEKEIDDEDMLSPIKSNLNVVRVNDTDDNLQ  
ALFDSVLNPGDAKRPLQLPLRMRKLPNSFFTPPAPSHSRANSADSTYDAGSQSSINIGNKASIVQQPDGQSPIAA  
IPQLQIQPSPQHSRLAIHHSRARSPPASLQQNYNVRARSDAAAANNPNANPSSQQQPAGPTFFPNSAQEFPSGAP  
ASSAIDLAMNTCMSQDIPMSMQTVHKKQRSYDVISPQLNRQLGALPPGWEQAKTNDGQIYYLNHTTKSTQWED  
PRIQYRQQQILMAERIKQNDVLQTTKQTTTSTMLTIWVHCRMVGSRLPSPEIFTL PLRMRKLPNSFFTPP

gp:AK093387\_1 [AK093387] Homo sapiens cDNA FLJ36068 fis, clone  
TESTI2019352. [Homo sapiens] 191..205

MPLERSSGERNDAAPTNRHPGKRTSTAKQVSSVPFLGAAGHQQLPSSWKASCSPVMSDSDV  
KMLLNFNVLASSDIKAAALDKSAPCRRSVDHRKYLQKQLKRFSSQKYSRLPRGLPGRAAEPYLRKGSSEDRPRRLLLD  
LGPDSSPGGGGCKEKVLRSPYREECLAKEQLPQRQHPEAAQPGQVPMRKRQLPASFWEEPRTSHSYHVGLEGLL  
GPREGPPYEGKKNCKGLEPLGPETTLVSMSPRALAEKEPLKMPGVSLLVGRVNAWSSCFQYHGQPIYPGPLGALP  
QSPVPSLGLWRKSPAFPGELAHLCCKVDVGLGQKVCPRVVLKPIPTKPAVPPPIFNVFGYL  
PMRKRQLPASFWEEP

gp:BC150621\_1 [BC150621] family with sequence similarity 181, member B [Homo sapiens] 221..235

MAVQAALLSTHPFVFPFGFGGSPDGLGGAFGALDKGCCFEDDETGAPAGALLSGAEGGDVREATRDLLSF  
IDSASSNIKLALDKPGKSKRKVNHRKYLQKQIKRCSGLMGAAPPSPSAADTPAKRPLAAPSAPTVAAPAHGK  
AAPRREASQAAAAASLQSRSLAALFDSLRLHVPGGAEPAGGEVAAPAAGLGGAGTGGAGGDVAGPAGATAIPGARK  
VPLRARNLPPSFFTEPSRAGGGGCGPSGPDVSLGDLEKGAEEVEFFELLGPDYAGTEAAVLLAAEPLDVFPAGA  
SVLRGPPELEPGLFEPFPAVVGNNLLYPEPWSVPGCSPTKKSPLTAPRGGLTLNEPLSPLYPAAADSPPGGEDGRGH  
LASFAFFFPDCALPPPPPPHQQVSYNYSAGYSRTAYSSLWRS DGVWEGAPGEEGAHRD PLRARNLPPSFFTEP

gp:AB041569\_1 [AB041569] Mus musculus brain cDNA, clone MNCb-1231. [Mus musculus] 215..229

MAVQAALLSSHPIFPFGFGGSADGLVSAFGSLDKGCCFEDDESGATAGALLSGSEGGDVREATRDLLSF  
IDSASSNIKLALDKPGKSKRKVNHRKYLQKQIRRC SGLMGTAPPRPASPSAADAPAKRPPGAPTVAATPAHCKAAP  
RREATQAAAAASLQSRSLAALFDSLRLHIPGGAETAGGAEAVSVPLGAASAVGDGAGTAVSSVAPGTRKRVPLRAR  
NLPPSFFTEPSRVCWLAPAASHRARA PLRARNLPPSFFTEP

gp:DQ186896\_1 [DQ186896] neuron-specific YAPdeltaC insert13 isoform [Rattus norvegicus] 70..84

MEPAQQPPPQPAPQGPAPPSVSPAGTPAAPPAPPAGHQVVHVRGDSETDLEALFNAVMPKNTANVPQTV  
PMRLRKL PDSFFKPPPEPKSHSRQASTDAGTAGALTPQHVRHSSPASLQLGAGTLTASGVVSGPAATPAAQHRLRQ  
SSFEIPDDVPLPAGWEMAKTSSGQRYFLNHNDQTTTWQDPRKAMLSQLNVPTSASPAVPQTLMNSASGPLPDGWE  
QAMTQDGEVYYINHKNKTTSWLDPRLDPRFAMNQRIQSAPVKQPPPLAPQSPQGGV LGGGSSNQQQQIQLQQLQ  
MEKERLRLKQQELFRQTVRAGISSPQPVALTGAGWRDSECSVFSRDDSGIEDNDNQ PMRLRKL PDSFFKPP

gp:DQ186897\_1 [DQ186897] neuron-specific YAPdeltaC insert25 isoform [Rattus norvegicus] 70..84

MEPAQQPPPQPAPQGPAPPSVSPAGTPAAPPAPPAGHQVVHVRGDSETDLEALFNAVMPKNTANVPQTV  
PMRLRKL PDSFFKPPPEPKSHSRQASTDAGTAGALTPQHVRHSSPASLQLGAGTLTASGVVSGPAATPAAQHRLRQ  
SSFEIPDDVPLPAGWEMAKTSSGQRYFLNHNDQTTTWQDPRKAMLSQLNVPTSASPAVPQTLMNSASGPLPDGWE  
QAMTQDGEVYYINHKNKTTSWLDPRLDPRFAMNQRIQSAPVKQPPPLAPQSPQGGV LGGGSSNQQQQIQLQQLQ  
MEKERLRLKQQELFRQVRPQTVRAGISSPQPVALTGAGWRDSECSVFSRDDSGIEDNDNQ  
PMRLRKL PDSFFKPP

gp:KJ898207\_1 [KJ898207] YAP1 [synthetic construct] 85..99

MDPGQQPPPQPAPQGGQPPSQPPQGGQPPSGPGQPAPAATQAAPQAPPAGHQIVHVRGDSETDLEALF  
NAVMPKNTANVPQTVPMRLRKL PDSFFKPPPEPKSHSRQASTDAGTAGALTPQHVRHSSPASLQLGAVSPGTLTP  
TGVVSGPAATPTAQHLRQSSFEIPDDVPLPAGWEMAKTSSGQRYFLNHIDQTTTWQDPRKAMLSQMNVTAPTSP  
VQQNMMNSASGPLPDGWEQAMTQDGEIYYINHKNKTTSWLDPRLDPRFAMNQRIQSAPVKQPPPLAPQSPQGGV  
MGGSNSNQQQMRLQQLQMEKERLRLKQQELLRQAMRNINPSTANSPKCQELALRSQLPTLEQDGGTQNPVSSPG  
MSQELRTMTTNSDPFLNSGTYHSRDESTDSGLSMSSYSVPRTPDDFLNSVDEMDTGDTINQSTLPSQQNRFPDY  
LEAIPGTNVDLGTLEGDGMNIEGEEELMPSLQEQALSSDILNDMESVLAATKLDNESFLTWL  
PMRLRKL PDSFFKPP

gp:BC129216\_1 [BC129216] Yes-associated protein 1 [Danio rerio] 45..59

MDPNQHNPPAGHQIVHVRGDSETDLEALFNAVMPKNTIVPPSVPMRLRKL PDSFFTPPEPKSHSRQAS  
TDAGTAGTVTPHHVRHSSPASLQLGAVSPGALTSMPANAPPQHLRQSSYEIPDDMPLPPGWEMAKTPSGQRYF  
LNHNDQTTTWQDPRKALLQMNQAAPASVPVQQQNMNPASGPLPDGWEQAITSEGEIYYINHKNKTTSWLDPRL  
DPRFAMNQRIQSAPVKQGSQLPSSPQSGVMSGNNPIRLQQIHIEKERLRIKQELLRQRPELALRNQLPTSME  
QDGGTQNPVSSPGMQDARNMTTNSDPFLNSGTYHSRDESTDSGLSMSSYSVPRTPDDFLNSVDEMETGDTLGP  
SSMATQPSRFPDYLD AIPGTDVLDLGTLEGESMAVEGEEELMPSLQEQALSSDILNDMESVLAATKIDKENFLTWL  
PMRLRKL PDSFFTPP
